# Supplementary material for: Comparative Analysis of Molecular Conformers Using Localization–Delocalization Matrices and Frobenius Distance
Source: Research Square preprint supplement (doi:10.21203/rs.3.rs-7999250/v1), 2025-11-18
Supplement: Supplementary file 1 [file 0bb5d257b64582a50f582ab4.xlsx]

## Sheet: Boltzmann_distribution
Conformer ID	E (HF)	Delta E(HF)	HF (kcal/mol)	Boltzman distribution	Boltzman's weight	% (percentage)	Conformer_type	FD_R	FD_W	Nloc	Ndeloc
1	-632.798	0	0	1	0.930874	0.930874	1rcp with1ccp	0	0.00265617	42.8552	19.1442
2	-632.795	0.0036285	2.27689	0.0219509	0.0204335	0.0204335	acyclic	0.0522662	0.0500145	42.8658	19.1337
3	-632.795	0.003726	2.33808	0.0198101	0.0184407	0.0184407	acyclic	0.0403177	0.0389104	42.8764	19.1236
4	-632.794	0.0041076	2.57753	0.0132575	0.012341	0.012341	acyclic	0.0465293	0.044375	42.8797	19.1214
5	-632.794	0.0044027	2.76271	0.00971793	0.00904617	0.00904617	1rcp	0.0453744	0.0433532	42.8713	19.1289
6	-632.794	0.0048037	3.01434	0.00637208	0.0059316	0.0059316	1rcp	0.0497859	0.047685	42.8685	19.1316
7	-632.791	0.0070331	4.41329	0.000609883	0.000567724	0.000567724	acyclic	0.0508615	0.0485753	42.892	19.1065
8	-632.791	0.0070648	4.43318	0.000589871	0.000549095	0.000549095	acyclic	0.0510738	0.0489627	42.892	19.1089
9	-632.791	0.0071508	4.48715	0.000538824	0.000501578	0.000501578	acyclic	0.0510668	0.0487452	42.8837	19.1169
10	-632.791	0.0073653	4.62175	0.000429934	0.000400214	0.000400214	acyclic	0.0474767	0.045216	42.8847	19.1161
11	-632.791	0.0073653	4.62175	0.000429934	0.000400214	0.000400214	acyclic	0.0490229	0.0467548	42.8843	19.116
12	-632.791	0.0076827	4.82092	0.000307838	0.000286558	0.000286558	acyclic	0.0488792	0.0466966	42.8753	19.1224
13	-632.791	0.0079002	4.9574	0.000244853	0.000227927	0.000227927	1rcp	0.0496394	0.0475594	42.8775	19.1231
					1	1				42.8564	19.143

## Sheet: LDM
LDM — diallyl_monosulfide_1_LIDI_matrix
	S1	C2	C3	C4	C5	C6	C7	H8	H9	H10	H11	H12	H13	H14	H15	H16	H17		nloc	Ndeloc		nloc	Ndeloc
S1	14.6663	0.538987	0.53901	0.0426254	0.0426357	0.0212842	0.021288	0.0264234	0.0290277	0.026426	0.0290185	0.00792985	0.00792887	0.00153356	0.00143106	0.00143029	0.00153377		42.8552	19.1442
C2	0.538987	4.0127	0.021765	0.51463	0.00681486	0.0357208	0.00387025	0.466046	0.459067	0.00534012	0.00247808	0.0195909	0.000275506	0.00629503	0.00599821	0.000227443	0.000119319
C3	0.53901	0.021765	4.01285	0.00682941	0.51468	0.0038754	0.0357355	0.00533992	0.00246404	0.466054	0.459083	0.000275792	0.0195793	0.000119432	0.000229883	0.00599961	0.0062958
C4	0.0426254	0.51463	0.00682941	3.96827	0.000839792	0.916073	0.000888271	0.0197259	0.0184493	0.000704614	0.0083034	0.472754	0.000202233	0.0303835	0.029953	0.00126794	5.54281e-05
C5	0.0426357	0.00681486	0.51468	0.000839792	3.9683	0.000886201	0.916137	0.000703597	0.00825994	0.0197273	0.0184706	0.00020183	0.472742	5.52186e-05	0.00126866	0.0299508	0.0303889
C6	0.0212842	0.0357208	0.0038754	0.916073	0.000886201	4.09088	0.00297446	0.00948352	0.00603604	0.000361972	0.00786481	0.0291588	0.000192437	0.484592	0.478032	0.00464798	0.000167499
C7	0.021288	0.00387025	0.0357355	0.000888271	0.916137	0.00297446	4.09092	0.000361852	0.00782731	0.00948393	0.006042	0.000192097	0.0291606	0.000167269	0.00465272	0.477983	0.484601
H8	0.0264234	0.466046	0.00533992	0.0197259	0.000703597	0.00948352	0.000361852	0.399257	0.0145524	0.000914919	0.000223192	0.0013635	2.10675e-05	0.000812204	0.000481728	3.45118e-05	1.01237e-05
H9	0.0290277	0.459067	0.00246404	0.0184493	0.00825994	0.00603604	0.00782731	0.0145524	0.389288	0.000222612	0.000119948	0.00505263	0.000261675	0.000438626	0.00399444	0.000352783	0.000201721
H10	0.026426	0.00534012	0.466054	0.000704614	0.0197273	0.000361972	0.00948393	0.000914919	0.000222612	0.399263	0.014552	2.11118e-05	0.00136371	1.01157e-05	3.4741e-05	0.000481543	0.000812202
H11	0.0290185	0.00247808	0.459083	0.0083034	0.0184706	0.00786481	0.006042	0.000223192	0.000119948	0.014552	0.389259	0.000263228	0.00505193	0.000202918	0.000359565	0.00399783	0.000439224
H12	0.00792985	0.0195909	0.000275792	0.472754	0.00020183	0.0291588	0.000192097	0.0013635	0.00505263	2.11118e-05	0.000263228	0.411155	2.2174e-05	0.00366639	0.0067027	0.000106467	8.50702e-06
H13	0.00792887	0.000275506	0.0195793	0.000202233	0.472742	0.000192437	0.0291606	2.10675e-05	0.000261675	0.00136371	0.00505193	2.2174e-05	0.411156	8.51294e-06	0.00010656	0.00670204	0.00366642
H14	0.00153356	0.00629503	0.000119432	0.0303835	5.52186e-05	0.484592	0.000167269	0.000812204	0.000438626	1.01157e-05	0.000202918	0.00366639	8.51294e-06	0.413261	0.0168212	0.000180365	3.11851e-06
H15	0.00143106	0.00599821	0.000229883	0.029953	0.00126866	0.478032	0.00465272	0.000481728	0.00399444	3.4741e-05	0.000359565	0.0067027	0.00010656	0.0168212	0.409539	0.00476315	0.000181132
H16	0.00143029	0.000227443	0.00599961	0.00126794	0.0299508	0.00464798	0.477983	3.45118e-05	0.000352783	0.000481543	0.00399783	0.000106467	0.00670204	0.000180365	0.00476315	0.409498	0.0168189
H17	0.00153377	0.000119319	0.0062958	5.54281e-05	0.0303889	0.000167499	0.484601	1.01237e-05	0.000201721	0.000812202	0.000439224	8.50702e-06	0.00366642	3.11851e-06	0.000181132	0.0168189	0.413264
	16.0048	6.09993	6.10019	6.03196	6.03206	6.09223	6.09229	0.945755	0.945616	0.945774	0.94573	0.958465	0.958441	0.95855	0.96455	0.964443	0.958567	61.9994
LDM — diallyl_monosulfide_2_LIDI_matrix
	S1	C2	C3	C4	C5	C6	C7	H8	H9	H10	H11	H12	H13	H14	H15	H16	H17
S1	14.6657	0.538799	0.53937	0.041968	0.0431194	0.0221199	0.0216192	0.0297316	0.0262786	0.0298365	0.0258431	0.00737022	0.00260294	0.0015228	0.00138073	0.00104418	0.00157055		42.8658	19.1337
C2	0.538799	4.00737	0.0214104	0.515302	0.00398035	0.0358947	0.000784364	0.46301	0.465673	0.00273839	0.00529643	0.0195188	0.0039131	0.00630036	0.00616489	0.00016459	5.9124e-05
C3	0.53937	0.0214104	4.01296	0.00791325	0.514716	0.00489355	0.0362572	0.0017643	0.00532699	0.457167	0.465905	0.000288048	0.0192676	0.000141257	0.000282804	0.00629627	0.00630176
C4	0.041968	0.515302	0.00791325	3.96695	0.00081704	0.914628	0.000247546	0.0191027	0.019592	0.010277	0.000771531	0.472607	0.000686556	0.0301879	0.0303972	3.83435e-05	3.11378e-05
C5	0.0431194	0.00398035	0.514716	0.00081704	3.96655	0.00103081	0.923528	0.0040054	0.000419298	0.0195848	0.018584	0.000144501	0.471038	4.13149e-05	0.00114503	0.0305726	0.0306314
C6	0.0221199	0.0358947	0.00489355	0.914628	0.00103081	4.08952	0.000262287	0.00628353	0.00917888	0.00994567	0.000417916	0.0290968	0.00179339	0.48418	0.480843	4.01635e-05	2.05822e-05
C7	0.0216192	0.000784364	0.0362572	0.000247546	0.923528	0.000262287	4.08367	0.000756905	0.000204534	0.00890775	0.00649525	5.10768e-05	0.0301428	1.10001e-05	0.000194703	0.481715	0.484487
H8	0.0297316	0.46301	0.0017643	0.0191027	0.0040054	0.00628353	0.000756905	0.403828	0.0150037	0.000111851	0.000222212	0.00516549	0.00573616	0.000459751	0.0041484	0.000155866	5.42429e-05
H9	0.0262786	0.465673	0.00532699	0.019592	0.000419298	0.00917888	0.000204534	0.0150037	0.397718	0.000247016	0.000853263	0.00150284	0.000336	0.00082259	0.000499085	3.1507e-05	2.36403e-05
H10	0.0298365	0.00273839	0.457167	0.010277	0.0195848	0.00994567	0.00890775	0.000111851	0.000247016	0.384357	0.0144251	0.000356703	0.00121948	0.000258128	0.000459031	0.000444558	0.000770256
H11	0.0258431	0.00529643	0.465905	0.000771531	0.018584	0.000417916	0.00649525	0.000222212	0.000853263	0.0144251	0.401051	2.22135e-05	0.00518852	9.8202e-06	3.1358e-05	0.00429539	0.000490748
H12	0.00737022	0.0195188	0.000288048	0.472607	0.000144501	0.0290968	5.10768e-05	0.00516549	0.00150284	0.000356703	2.22135e-05	0.40968	0.000160256	0.00363912	0.00681517	6.01135e-06	5.99775e-06
H13	0.00260294	0.0039131	0.0192676	0.000686556	0.471038	0.00179339	0.0301428	0.00573616	0.000336	0.00121948	0.00518852	0.000160256	0.418447	0.000142125	0.00212203	0.00674554	0.00372354
H14	0.0015228	0.00630036	0.000141257	0.0301879	4.13149e-05	0.48418	1.10001e-05	0.000459751	0.00082259	0.000258128	9.8202e-06	0.00363912	0.000142125	0.411155	0.0169511	1.84127e-06	5.60752e-07
H15	0.00138073	0.00616489	0.000282804	0.0303972	0.00114503	0.480843	0.000194703	0.0041484	0.000499085	0.000459031	3.1358e-05	0.00681517	0.00212203	0.0169511	0.415967	6.45902e-05	1.58374e-05
H16	0.00104418	0.00016459	0.00629627	3.83435e-05	0.0305726	4.01635e-05	0.481715	0.000155866	3.1507e-05	0.000444558	0.00429539	6.01135e-06	0.00674554	1.84127e-06	6.45902e-05	0.416679	0.0170846
H17	0.00157055	5.9124e-05	0.00630176	3.11378e-05	0.0306314	2.05822e-05	0.484487	5.42429e-05	2.36403e-05	0.000770256	0.000490748	5.99775e-06	0.00372354	5.60752e-07	1.58374e-05	0.0170846	0.41425
LDM — diallyl_monosulfide_3_LIDI_matrix
	S1	C2	C3	C4	C5	C6	C7	H8	H9	H10	H11	H12	H13	H14	H15	H16	H17
S1	14.665	0.537783	0.537704	0.0427353	0.0415921	0.0220489	0.0192615	0.029799	0.0260843	0.0308859	0.0279115	0.00756922	0.00703273	0.00151446	0.00146418	0.00123342	0.00111508		42.8764	19.1236
C2	0.537783	4.00842	0.0219324	0.515202	0.0054718	0.0357986	0.00255807	0.465189	0.46598	0.00181802	0.0039478	0.0195466	0.000292888	0.00629647	0.0063066	0.000117289	0.000244747
C3	0.537704	0.0219324	4.01422	0.00711473	0.515714	0.00482969	0.0372665	0.00346252	0.00508425	0.46656	0.455276	0.000300655	0.0195996	0.000137953	0.000507716	0.00635646	0.00640498
C4	0.0427353	0.515202	0.00711473	3.96707	0.000769446	0.914726	0.000346084	0.0191569	0.0196873	0.000453346	0.0106806	0.47259	6.89922e-05	0.0302189	0.0304296	2.73562e-05	5.08582e-05
C5	0.0415921	0.0054718	0.515714	0.000769446	3.97258	0.000515571	0.923135	0.000469648	0.00093457	0.0189073	0.019063	3.30643e-05	0.473003	1.85814e-05	8.59635e-05	0.0305251	0.03052
C6	0.0220489	0.0357986	0.00482969	0.914726	0.000515571	4.09044	0.000630136	0.00636523	0.00916903	0.000268827	0.0117071	0.0290084	2.4718e-05	0.484258	0.481418	2.54264e-05	4.14447e-05
C7	0.0192615	0.00255807	0.0372665	0.000346084	0.923135	0.000630136	4.08486	8.20764e-05	0.000597855	0.00656214	0.00929293	1.56159e-05	0.0293734	2.25075e-05	3.36924e-05	0.481615	0.484303
H8	0.029799	0.465189	0.00346252	0.0191569	0.000469648	0.00636523	8.20764e-05	0.406282	0.015133	0.00151699	0.000344138	0.00524746	0.000151134	0.000476145	0.00437508	1.6806e-05	1.15946e-05
H9	0.0260843	0.46598	0.00508425	0.0196873	0.00093457	0.00916903	0.000597855	0.015133	0.398204	0.000183691	0.000324064	0.00147964	1.84198e-05	0.000814672	0.000499788	2.79489e-05	6.68296e-05
H10	0.0308859	0.00181802	0.46656	0.000453346	0.0189073	0.000268827	0.00656214	0.00151699	0.000183691	0.410912	0.01506	0.000132821	0.0052329	1.11907e-05	0.000120348	0.00432365	0.000490499
H11	0.0279115	0.0039478	0.455276	0.0106806	0.019063	0.0117071	0.00929293	0.000344138	0.000324064	0.01506	0.382438	0.000271777	0.00150991	0.000294173	0.00106262	0.000534157	0.000762686
H12	0.00756922	0.0195466	0.000300655	0.47259	3.30643e-05	0.0290084	1.56159e-05	0.00524746	0.00147964	0.000132821	0.000271777	0.409938	1.60126e-05	0.00364637	0.00685135	2.69106e-06	1.49508e-06
H13	0.00703273	0.000292888	0.0195996	6.89922e-05	0.473003	2.4718e-05	0.0293734	0.000151134	1.84198e-05	0.0052329	0.00150991	1.60126e-05	0.410545	1.06461e-06	6.94802e-06	0.00681171	0.00367034
H14	0.00151446	0.00629647	0.000137953	0.0302189	1.85814e-05	0.484258	2.25075e-05	0.000476145	0.000814672	1.11907e-05	0.000294173	0.00364637	1.06461e-06	0.411645	0.0170232	9.66918e-07	1.00854e-06
H15	0.00146418	0.0063066	0.000507716	0.0304296	8.59635e-05	0.481418	3.36924e-05	0.00437508	0.000499788	0.000120348	0.00106262	0.00685135	6.94802e-06	0.0170232	0.416075	2.15456e-06	3.83314e-06
H16	0.00123342	0.000117289	0.00635646	2.73562e-05	0.0305251	2.54264e-05	0.481615	1.6806e-05	2.79489e-05	0.00432365	0.000534157	2.69106e-06	0.00681171	9.66918e-07	2.15456e-06	0.415037	0.0169917
H17	0.00111508	0.000244747	0.00640498	5.08582e-05	0.03052	4.14447e-05	0.484303	1.15946e-05	6.68296e-05	0.000490499	0.000762686	1.49508e-06	0.00367034	1.00854e-06	3.83314e-06	0.0169917	0.412748
LDM — diallyl_monosulfide_4_LIDI_matrix
	S1	C2	C3	C4	C5	C6	C7	H8	H9	H10	H11	H12	H13	H14	H15	H16	H17
S1	14.6664	0.538824	0.536842	0.0418267	0.0410033	0.0214281	0.0190902	0.0259906	0.0300178	0.0296276	0.0296593	0.00748629	0.00659776	0.00151995	0.00144231	0.00120941	0.00110255		42.8797	19.1214
C2	0.538824	4.00754	0.0219536	0.514731	0.00554646	0.0359725	0.00268127	0.466035	0.464227	0.00143517	0.00493933	0.0195617	0.000265617	0.00632468	0.00631356	0.000119948	0.000246414
C3	0.536842	0.0219536	4.00639	0.00751457	0.515343	0.00478418	0.0371821	0.00515479	0.00352658	0.461283	0.463285	0.000302162	0.0196052	0.000144555	0.000602584	0.0063708	0.00638792
C4	0.0418267	0.514731	0.00751457	3.96879	0.00106485	0.917508	0.000164929	0.0196581	0.0191481	0.00689427	0.00095811	0.472597	0.000241302	0.030366	0.0305201	3.53953e-05	2.29968e-05
C5	0.0410033	0.00554646	0.515343	0.00106485	3.97322	0.000630391	0.923595	0.000878869	0.000385866	0.0180867	0.0198424	3.93571e-05	0.473379	2.08247e-05	7.74563e-05	0.0304786	0.0305126
C6	0.0214281	0.0359725	0.00478418	0.917508	0.000630391	4.08965	0.000361576	0.00938387	0.00639816	0.0063084	0.00136564	0.0290972	0.000197154	0.484385	0.481534	3.55351e-05	2.26959e-05
C7	0.0190902	0.00268127	0.0371821	0.000164929	0.923595	0.000361576	4.08321	0.000558923	0.000209177	0.0064272	0.00965	1.3296e-05	0.0295459	1.42913e-05	4.2768e-05	0.481342	0.484223
H8	0.0259906	0.466035	0.00515479	0.0196581	0.000878869	0.00938387	0.000558923	0.398862	0.0150219	0.000170262	0.000381082	0.00144699	1.24859e-05	0.000815505	0.000501964	2.63081e-05	6.91799e-05
H9	0.0300178	0.464227	0.00352658	0.0191481	0.000385866	0.00639816	0.000209177	0.0150219	0.406871	0.000180703	0.00341383	0.00525942	2.30489e-05	0.000479403	0.00442819	1.21844e-05	2.05446e-05
H10	0.0296276	0.00143517	0.461283	0.00689427	0.0180867	0.0063084	0.0064272	0.000170262	0.000180703	0.395163	0.0153477	0.000278691	0.0050009	0.000164443	0.000252483	0.00420039	0.000480008
H11	0.0296593	0.00493933	0.463285	0.00095811	0.0198424	0.00136564	0.00965	0.000381082	0.00341383	0.0153477	0.406	0.000149945	0.00154858	6.92041e-05	0.000795247	0.000554202	0.000815905
H12	0.00748629	0.0195617	0.000302162	0.472597	3.93571e-05	0.0290972	1.3296e-05	0.00144699	0.00525942	0.000278691	0.000149945	0.410233	1.01028e-05	0.00365851	0.0068557	2.25482e-06	8.94295e-07
H13	0.00659776	0.000265617	0.0196052	0.000241302	0.473379	0.000197154	0.0295459	1.24859e-05	2.30489e-05	0.0050009	0.00154858	1.01028e-05	0.411666	8.07561e-06	6.61307e-06	0.00681128	0.0036762
H14	0.00151995	0.00632468	0.000144555	0.030366	2.08247e-05	0.484385	1.42913e-05	0.000815505	0.000479403	0.000164443	6.92041e-05	0.00365851	8.07561e-06	0.412283	0.0170394	1.1664e-06	6.66435e-07
H15	0.00144231	0.00631356	0.000602584	0.0305201	7.74563e-05	0.481534	4.2768e-05	0.000501964	0.00442819	0.000252483	0.000795247	0.0068557	6.61307e-06	0.0170394	0.416913	2.31684e-06	4.79031e-06
H16	0.00120941	0.000119948	0.0063708	3.53953e-05	0.0304786	3.55351e-05	0.481342	2.63081e-05	1.21844e-05	0.00420039	0.000554202	2.25482e-06	0.00681128	1.1664e-06	2.31684e-06	0.413866	0.0169564
H17	0.00110255	0.000246414	0.00638792	2.29968e-05	0.0305126	2.26959e-05	0.484223	6.91799e-05	2.05446e-05	0.000480008	0.000815905	8.94295e-07	0.0036762	6.66435e-07	4.79031e-06	0.0169564	0.412616
LDM — diallyl_monosulfide_5_LIDI_matrix
	S1	C2	C3	C4	C5	C6	C7	H8	H9	H10	H11	H12	H13	H14	H15	H16	H17
S1	14.6695	0.539961	0.536293	0.0410761	0.044058	0.0216688	0.0210648	0.0302	0.0262698	0.0269537	0.0273559	0.00723575	0.00496246	0.00156926	0.00147357	0.0011189	0.00146509		42.8713	19.1289
C2	0.539961	4.00404	0.0223813	0.51536	0.00185474	0.0360481	0.000941334	0.464256	0.465319	0.00370028	0.00716655	0.0194816	0.000425369	0.00631827	0.00635647	9.84467e-05	0.000115665
C3	0.536293	0.0223813	4.00872	0.00565503	0.514236	0.00347425	0.0368315	0.00304687	0.00534436	0.466313	0.460417	0.000305222	0.0190766	0.000123405	0.000579783	0.00646208	0.00637103
C4	0.0410761	0.51536	0.00565503	3.96778	0.00455336	0.914254	0.000554707	0.0192576	0.0197049	0.000732831	0.00364737	0.47194	0.00820382	0.0302959	0.0304407	0.000178716	5.53611e-05
C5	0.044058	0.00185474	0.514236	0.00455336	3.96947	0.00319028	0.923483	0.000394567	0.000377096	0.0188822	0.0194225	0.000602525	0.468345	9.39155e-05	0.000119628	0.0307492	0.0306089
C6	0.0216688	0.0360481	0.00347425	0.914254	0.00319028	4.08829	0.000404267	0.00650553	0.00964939	0.000361306	0.00467786	0.0289392	0.00622482	0.484178	0.481296	0.000138661	3.23244e-05
C7	0.0210648	0.000941334	0.0368315	0.000554707	0.923483	0.000404267	4.08971	0.000202728	0.000310551	0.00673953	0.00951854	6.49075e-05	0.0285937	3.01125e-05	4.0956e-05	0.482174	0.484769
H8	0.0302	0.464256	0.00304687	0.0192576	0.000394567	0.00650553	0.000202728	0.406492	0.0149744	0.000205837	0.00319017	0.00527239	8.10819e-05	0.000482647	0.00447518	1.31237e-05	1.74517e-05
H9	0.0262698	0.465319	0.00534436	0.0197049	0.000377096	0.00964939	0.000310551	0.0149744	0.397898	0.000659337	0.000531144	0.00139289	5.83516e-05	0.000815933	0.000509074	2.437e-05	4.30635e-05
H10	0.0269537	0.00370028	0.466313	0.000732831	0.0188822	0.000361306	0.00673953	0.000205837	0.000659337	0.401746	0.0148428	9.12696e-05	0.0051725	1.65614e-05	5.04391e-05	0.00456457	0.000502874
H11	0.0273559	0.00716655	0.460417	0.00364737	0.0194225	0.00467786	0.00951854	0.00319017	0.000531144	0.0148428	0.394566	0.000169305	0.00115957	0.000153987	0.00134933	0.000461287	0.000770448
H12	0.00723575	0.0194816	0.000305222	0.47194	0.000602525	0.0289392	6.49075e-05	0.00527239	0.00139289	9.12696e-05	0.000169305	0.409028	0.00131523	0.00363353	0.0068392	3.16879e-05	1.15338e-05
H13	0.00496246	0.000425369	0.0190766	0.00820382	0.468345	0.00622482	0.0285937	8.10819e-05	5.83516e-05	0.0051725	0.00115957	0.00131523	0.403108	0.00030369	0.000158229	0.00661455	0.00360187
H14	0.00156926	0.00631827	0.000123405	0.0302959	9.39155e-05	0.484178	3.01125e-05	0.000482647	0.000815933	1.65614e-05	0.000153987	0.00363353	0.00030369	0.411449	0.0169744	6.31051e-06	2.36935e-06
H15	0.00147357	0.00635647	0.000579783	0.0304407	0.000119628	0.481296	4.0956e-05	0.00447518	0.000509074	5.04391e-05	0.00134933	0.0068392	0.000158229	0.0169744	0.416202	4.34939e-06	3.64836e-06
H16	0.0011189	9.84467e-05	0.00646208	0.000178716	0.0307492	0.000138661	0.482174	1.31237e-05	2.437e-05	0.00456457	0.000461287	3.16879e-05	0.00661455	6.31051e-06	4.34939e-06	0.418544	0.0171618
H17	0.00146509	0.000115665	0.00637103	5.53611e-05	0.0306089	3.23244e-05	0.484769	1.74517e-05	4.30635e-05	0.000502874	0.000770448	1.15338e-05	0.00360187	2.36935e-06	3.64836e-06	0.0171618	0.41469
LDM — diallyl_monosulfide_6_LIDI_matrix
	S1	C2	C3	C4	C5	C6	C7	H8	H9	H10	H11	H12	H13	H14	H15	H16	H17
S1	14.6796	0.537874	0.540588	0.0420888	0.0381256	0.0190209	0.019089	0.0269932	0.0279191	0.0268633	0.0306842	0.00755466	0.0074697	0.00158584	0.00126525	0.00137188	0.00158466		42.8685	19.1316
C2	0.537874	4.01021	0.0220421	0.513514	0.00603505	0.0357868	0.00272788	0.462186	0.466122	0.00538451	0.00235348	0.0197761	0.000334621	0.00632464	0.00599791	0.000259841	0.000117835
C3	0.540588	0.0220421	4.00455	0.0019524	0.515069	0.000879089	0.0367249	0.00588158	0.00417876	0.464232	0.464562	0.000319932	0.0193446	5.25757e-05	0.00015972	0.00651573	0.0063368
C4	0.0420888	0.513514	0.0019524	3.96885	0.00660571	0.920588	0.00324112	0.0184451	0.0201416	0.00033902	0.000365786	0.473221	0.00196068	0.0307686	0.0299961	0.000132742	0.000205029
C5	0.0381256	0.00603505	0.515069	0.00660571	3.96245	0.00752157	0.914464	0.00330528	0.000673239	0.0197179	0.0192127	0.000196071	0.470476	0.00018414	0.00276417	0.0307089	0.0302755
C6	0.0190209	0.0357868	0.000879089	0.920588	0.00752157	4.07949	0.00685376	0.00602893	0.00991228	0.000364964	8.45501e-05	0.0294209	0.00162022	0.484589	0.478705	0.000188744	0.000587753
C7	0.019089	0.00272788	0.0367249	0.00324112	0.914464	0.00685376	4.0838	0.0032473	0.000266404	0.0106968	0.00684888	0.00018351	0.0283264	0.000253089	0.00526097	0.481808	0.483855
H8	0.0269932	0.462186	0.00588158	0.0184451	0.00330528	0.00602893	0.0032473	0.397351	0.0149539	0.000428373	0.00218804	0.00517875	0.00012757	0.000447661	0.00394772	0.000587284	0.000100247
H9	0.0279191	0.466122	0.00417876	0.0201416	0.000673239	0.00991228	0.000266404	0.0149539	0.399415	0.000761018	0.000184034	0.00124638	6.4477e-05	0.000776813	0.00046946	2.26219e-05	1.60716e-05
H10	0.0268633	0.00538451	0.464232	0.00033902	0.0197179	0.000364964	0.0106968	0.000428373	0.000761018	0.39733	0.0150669	1.3725e-05	0.00110499	2.23721e-05	6.5113e-05	0.00052971	0.000794715
H11	0.0306842	0.00235348	0.464562	0.000365786	0.0192127	8.45501e-05	0.00684888	0.00218804	0.000184034	0.0150669	0.407327	0.000168809	0.00528557	4.15386e-06	1.8967e-05	0.00478932	0.000515586
H12	0.00755466	0.0197761	0.000319932	0.473221	0.000196071	0.0294209	0.00018351	0.00517875	0.00124638	1.3725e-05	0.000168809	0.414381	7.75828e-05	0.00374664	0.00678238	2.87804e-05	1.56545e-05
H13	0.0074697	0.000334621	0.0193446	0.00196068	0.470476	0.00162022	0.0283264	0.00012757	6.4477e-05	0.00110499	0.00528557	7.75828e-05	0.405455	4.08926e-05	0.000107259	0.00678938	0.00361088
H14	0.00158584	0.00632464	5.25757e-05	0.0307686	0.00018414	0.484589	0.000253089	0.000447661	0.000776813	2.23721e-05	4.15386e-06	0.00374664	4.08926e-05	0.415399	0.016918	8.76602e-06	1.83923e-05
H15	0.00126525	0.00599791	0.00015972	0.0299961	0.00276417	0.478705	0.00526097	0.00394772	0.00046946	6.5113e-05	1.8967e-05	0.00678238	0.000107259	0.016918	0.411514	0.000239492	0.000560449
H16	0.00137188	0.000259841	0.00651573	0.000132742	0.0307089	0.000188744	0.481808	0.000587284	2.26219e-05	0.00052971	0.00478932	2.87804e-05	0.00678938	8.76602e-06	0.000239492	0.418707	0.0171123
H17	0.00158466	0.000117835	0.0063368	0.000205029	0.0302755	0.000587753	0.483855	0.000100247	1.60716e-05	0.000794715	0.000515586	1.56545e-05	0.00361088	1.83923e-05	0.000560449	0.0171123	0.412659
LDM — diallyl_monosulfide_7_LIDI_matrix
	S1	C2	C3	C4	C5	C6	C7	H8	H9	H10	H11	H12	H13	H14	H15	H16	H17
S1	14.6664	0.536573	0.536507	0.0407134	0.0407042	0.0189952	0.0189949	0.030473	0.02929	0.0292623	0.0304939	0.00670985	0.00671083	0.00109325	0.00121507	0.00121513	0.00109308		42.892	19.1065
C2	0.536573	4.00496	0.0226402	0.515383	0.00541676	0.0371977	0.00249428	0.465583	0.464358	0.00527306	0.00227476	0.0195837	0.000300862	0.00639261	0.00634126	0.000114647	0.000231544
C3	0.536507	0.0226402	4.00477	0.00541828	0.515336	0.00249411	0.0371919	0.00227488	0.00527422	0.464321	0.465562	0.000300788	0.0195849	0.000231564	0.000114639	0.00634184	0.00639212
C4	0.0407134	0.515383	0.00541828	3.9735	0.00102675	0.923388	0.000546395	0.0187157	0.0199933	0.00064497	0.000290154	0.473091	3.18722e-05	0.0304654	0.0304912	2.73224e-05	6.48022e-05
C5	0.0407042	0.00541676	0.515336	0.00102675	3.9734	0.000546297	0.923354	0.000290204	0.000644724	0.0199902	0.0187026	3.18674e-05	0.473063	6.48003e-05	2.73183e-05	0.0304755	0.0304616
C6	0.0189952	0.0371977	0.00249411	0.923388	0.000546297	4.08298	0.000744731	0.00656145	0.00971604	9.44057e-05	0.000155659	0.029394	2.72172e-05	0.484092	0.481405	2.96632e-05	5.19471e-05
C7	0.0189949	0.00249428	0.0371919	0.000546395	0.923354	0.000744731	4.08298	0.000155666	9.44193e-05	0.0097167	0.00656531	2.72186e-05	0.0293892	5.19487e-05	2.96632e-05	0.481413	0.484077
H8	0.030473	0.465583	0.00227488	0.0187157	0.000290204	0.00656145	0.000155666	0.409452	0.0157359	0.00244278	0.000233807	0.0051847	3.37785e-05	0.000490209	0.00429853	9.97162e-06	1.34731e-05
H9	0.02929	0.464358	0.00527422	0.0199933	0.000644724	0.00971604	9.44193e-05	0.0157359	0.405787	0.000793443	0.00244281	0.00155265	0.000168562	0.000820156	0.000558607	2.02609e-05	1.68961e-05
H10	0.0292623	0.00527306	0.464321	0.00064497	0.0199902	9.44057e-05	0.0097167	0.00244278	0.000793443	0.405789	0.015736	0.000168555	0.00155264	1.68962e-05	2.02603e-05	0.000558616	0.000820146
H11	0.0304939	0.00227476	0.465562	0.000290154	0.0187026	0.000155659	0.00656531	0.000233807	0.00244281	0.015736	0.409451	3.37792e-05	0.00518472	1.34733e-05	9.97172e-06	0.00429862	0.000490235
H12	0.00670985	0.0195837	0.000300788	0.473091	3.18674e-05	0.029394	2.72186e-05	0.0051847	0.00155265	0.000168555	3.37792e-05	0.410075	4.64557e-06	0.00366633	0.00679746	1.77812e-06	1.60199e-06
H13	0.00671083	0.000300862	0.0195849	3.18722e-05	0.473063	2.72172e-05	0.0293892	3.37785e-05	0.000168562	0.00155264	0.00518472	4.64557e-06	0.410075	1.60205e-06	1.77809e-06	0.00679748	0.00366653
H14	0.00109325	0.00639261	0.000231564	0.0304654	6.48003e-05	0.484092	5.19487e-05	0.000490209	0.000820156	1.68962e-05	1.34733e-05	0.00366633	1.60205e-06	0.411823	0.0169408	2.33774e-06	5.26753e-06
H15	0.00121507	0.00634126	0.000114639	0.0304912	2.73183e-05	0.481405	2.96632e-05	0.00429853	0.000558607	2.02603e-05	9.97172e-06	0.00679746	1.77809e-06	0.0169408	0.414371	1.35104e-06	2.33763e-06
H16	0.00121513	0.000114647	0.00634184	2.73224e-05	0.0304755	2.96632e-05	0.481413	9.97162e-06	2.02609e-05	0.000558616	0.00429862	1.77812e-06	0.00679748	2.33774e-06	1.35104e-06	0.41437	0.0169409
H17	0.00109308	0.000231544	0.00639212	6.48022e-05	0.0304616	5.19471e-05	0.484077	1.34731e-05	1.68961e-05	0.000820146	0.000490235	1.60199e-06	0.00366653	5.26753e-06	2.33763e-06	0.0169409	0.411818
LDM — diallyl_monosulfide_8_LIDI_matrix
	S1	C2	C3	C4	C5	C6	C7	H8	H9	H10	H11	H12	H13	H14	H15	H16	H17
S1	14.6654	0.536874	0.536896	0.0408829	0.0409241	0.018968	0.0189708	0.0293794	0.030389	0.0303893	0.0293794	0.00671801	0.00671809	0.00108682	0.0012162	0.00121619	0.00108683		42.892	19.1089
C2	0.536874	4.0053	0.0222447	0.515322	0.00548405	0.0371676	0.00253651	0.463555	0.466131	0.00209388	0.00533168	0.0196241	0.000318403	0.00639499	0.00633943	0.000116858	0.000234005
C3	0.536896	0.0222447	4.00525	0.00547998	0.515358	0.00253605	0.0371732	0.00532922	0.00208897	0.466157	0.463509	0.000318085	0.0196578	0.000233953	0.000116828	0.00634838	0.00639581
C4	0.0408829	0.515322	0.00547998	3.97332	0.000980554	0.923369	0.000516236	0.0198722	0.0188263	0.00036974	0.00054164	0.473083	2.91758e-05	0.0304507	0.0304664	2.73936e-05	6.42814e-05
C5	0.0409241	0.00548405	0.515358	0.000980554	3.97349	0.000516285	0.923458	0.000542068	0.000370325	0.0188338	0.0198661	2.92258e-05	0.473136	6.42865e-05	2.74046e-05	0.0304822	0.0304678
C6	0.018968	0.0371676	0.00253605	0.923369	0.000516285	4.08269	0.000753953	0.00967657	0.00657069	8.11123e-05	0.000276499	0.0294272	1.14746e-05	0.484069	0.481349	2.89997e-05	5.25525e-05
C7	0.0189708	0.00253651	0.0371732	0.000516236	0.923458	0.000753953	4.08286	0.000276537	8.1143e-05	0.00658053	0.00967748	1.14809e-05	0.0294365	5.2552e-05	2.90008e-05	0.481381	0.484101
H8	0.0293794	0.463555	0.00532922	0.0198722	0.000542068	0.00967657	0.000276537	0.406129	0.015717	0.000222101	0.00509775	0.00154741	2.35298e-05	0.000810441	0.000556458	1.4286e-05	3.06054e-05
H9	0.030389	0.466131	0.00208897	0.0188263	0.000370325	0.00657069	8.1143e-05	0.015717	0.409292	0.0013019	0.000222109	0.00520649	0.000149475	0.000492742	0.00430824	1.55875e-05	5.46196e-06
H10	0.0303893	0.00209388	0.466157	0.00036974	0.0188338	8.11123e-05	0.00658053	0.000222101	0.0013019	0.409293	0.0157171	0.00014947	0.00520652	5.4616e-06	1.55875e-05	0.00430833	0.000492745
H11	0.0293794	0.00533168	0.463509	0.00054164	0.0198661	0.000276499	0.00967748	0.00509775	0.000222109	0.0157171	0.406128	2.35296e-05	0.00154736	3.06051e-05	1.42856e-05	0.000556468	0.000810455
H12	0.00671801	0.0196241	0.000318085	0.473083	2.92258e-05	0.0294272	1.14809e-05	0.00154741	0.00520649	0.00014947	2.35296e-05	0.410473	1.0038e-05	0.00366809	0.00679934	1.91779e-06	1.19759e-06
H13	0.00671809	0.000318403	0.0196578	2.91758e-05	0.473136	1.14746e-05	0.0294365	2.35298e-05	0.000149475	0.00520652	0.00154736	1.0038e-05	0.410473	1.19756e-06	1.91788e-06	0.00679933	0.00366803
H14	0.00108682	0.00639499	0.000233953	0.0304507	6.42865e-05	0.484069	5.2552e-05	0.000810441	0.000492742	5.4616e-06	3.06051e-05	0.00366809	1.19756e-06	0.411801	0.0169303	2.28949e-06	5.52609e-06
H15	0.0012162	0.00633943	0.000116828	0.0304664	2.74046e-05	0.481349	2.90008e-05	0.000556458	0.00430824	1.55875e-05	1.42856e-05	0.00679934	1.91788e-06	0.0169303	0.414121	1.3013e-06	2.28965e-06
H16	0.00121619	0.000116858	0.00634838	2.73936e-05	0.0304822	2.89997e-05	0.481381	1.4286e-05	1.55875e-05	0.00430833	0.000556468	1.91779e-06	0.00679933	2.28949e-06	1.3013e-06	0.414122	0.0169302
H17	0.00108683	0.000234005	0.00639581	6.42814e-05	0.0304678	5.25525e-05	0.484101	3.06054e-05	5.46196e-06	0.000492745	0.000810455	1.19759e-06	0.00366803	5.52609e-06	2.28965e-06	0.0169302	0.411802
LDM — diallyl_monosulfide_9_LIDI_matrix
	S1	C2	C3	C4	C5	C6	C7	H8	H9	H10	H11	H12	H13	H14	H15	H16	H17
S1	14.6628	0.537622	0.538796	0.0417043	0.0427551	0.0193988	0.0214485	0.0301365	0.0290885	0.0252924	0.0309475	0.00700072	0.0026194	0.00109862	0.00124479	0.00103501	0.00155215		42.8837	19.1169
C2	0.537622	4.005	0.02186	0.514892	0.00423316	0.0372264	0.000758167	0.464438	0.463431	0.00510439	0.0043361	0.0195724	0.00432758	0.00639521	0.00634813	0.000175558	5.61346e-05
C3	0.538796	0.02186	4.00664	0.00537098	0.514484	0.00270901	0.0362084	0.00109301	0.00567148	0.465749	0.46425	0.000243916	0.019462	0.000250122	0.000119643	0.00631867	0.00629238
C4	0.0417043	0.514892	0.00537098	3.97305	0.000649908	0.923291	0.000302382	0.0186763	0.0197816	0.000796331	0.000435844	0.473024	0.000550974	0.0304466	0.0304482	4.21863e-05	3.72705e-05
C5	0.0427551	0.00423316	0.514484	0.000649908	3.96852	0.00014823	0.923812	0.00307906	0.000678437	0.0185968	0.0202673	0.000168109	0.472249	1.51024e-05	2.2524e-05	0.0306067	0.0305871
C6	0.0193988	0.0372264	0.00270901	0.923291	0.00014823	4.08327	0.000251552	0.00661645	0.00967618	0.000512545	0.000258595	0.0293539	6.96388e-05	0.484093	0.481296	1.33091e-05	1.86545e-05
C7	0.0214485	0.000758167	0.0362084	0.000302382	0.923812	0.000251552	4.08303	0.000595322	0.000205146	0.00657882	0.00919869	7.43635e-05	0.0300619	1.30578e-05	1.70958e-05	0.481571	0.484297
H8	0.0301365	0.464438	0.00109301	0.0186763	0.00307906	0.00661645	0.000595322	0.406289	0.0156662	0.000208821	0.00019495	0.00510018	0.00433164	0.000493835	0.00432996	0.000129238	4.33464e-05
H9	0.0290885	0.463431	0.00567148	0.0197816	0.000678437	0.00967618	0.000205146	0.0156662	0.406097	0.000435719	0.00439148	0.00157113	0.000663956	0.000810875	0.00055852	3.84297e-05	1.7261e-05
H10	0.0252924	0.00510439	0.465749	0.000796331	0.0185968	0.000512545	0.00657882	0.000208821	0.000435719	0.400272	0.0150256	1.24415e-05	0.00518586	6.63925e-05	2.49821e-05	0.00435502	0.000496191
H11	0.0309475	0.0043361	0.46425	0.000435844	0.0202673	0.000258595	0.00919869	0.00019495	0.00439148	0.0150256	0.405257	2.61138e-05	0.00126998	2.56181e-05	1.47653e-05	0.000468112	0.000806961
H12	0.00700072	0.0195724	0.000243916	0.473024	0.000168109	0.0293539	7.43635e-05	0.00510018	0.00157113	1.24415e-05	2.61138e-05	0.410192	0.000126007	0.00365384	0.00679339	5.36273e-06	6.42189e-06
H13	0.0026194	0.00432758	0.019462	0.000550974	0.472249	6.96388e-05	0.0300619	0.00433164	0.000663956	0.00518586	0.00126998	0.000126007	0.418256	1.13481e-05	1.81246e-05	0.00679091	0.00371768
H14	0.00109862	0.00639521	0.000250122	0.0304466	1.51024e-05	0.484093	1.30578e-05	0.000493835	0.000810875	6.63925e-05	2.56181e-05	0.00365384	1.13481e-05	0.4117	0.0169176	1.88056e-06	1.45715e-06
H15	0.00124479	0.00634813	0.000119643	0.0304482	2.2524e-05	0.481296	1.70958e-05	0.00432996	0.00055852	2.49821e-05	1.47653e-05	0.00679339	1.81246e-05	0.0169176	0.413778	1.35514e-06	1.36631e-06
H16	0.00103501	0.000175558	0.00631867	4.21863e-05	0.0306067	1.33091e-05	0.481571	0.000129238	3.84297e-05	0.00435502	0.000468112	5.36273e-06	0.00679091	1.88056e-06	1.35514e-06	0.416104	0.0170322
H17	0.00155215	5.61346e-05	0.00629238	3.72705e-05	0.0305871	1.86545e-05	0.484297	4.33464e-05	1.7261e-05	0.000496191	0.000806961	6.42189e-06	0.00371768	1.45715e-06	1.36631e-06	0.0170322	0.413384
LDM — diallyl_monosulfide_10_LIDI_matrix
	S1	C2	C3	C4	C5	C6	C7	H8	H9	H10	H11	H12	H13	H14	H15	H16	H17
S1	14.6638	0.537816	0.538326	0.0409029	0.0438343	0.0191375	0.0209411	0.0305065	0.0288943	0.029966	0.0253833	0.00667978	0.00376561	0.00110389	0.00121839	0.00104462	0.00157352		42.8847	19.1161
C2	0.537816	4.00334	0.0223602	0.51504	0.00328756	0.0372036	0.000726328	0.465469	0.462501	0.00538837	0.0047752	0.0196135	0.00361001	0.00639496	0.00634197	0.000161665	6.77598e-05
C3	0.538326	0.0223602	4.00806	0.00560459	0.514364	0.00266234	0.0362437	0.00228837	0.00333505	0.464427	0.465709	0.000317534	0.0194206	0.000242462	0.000121084	0.00635685	0.00628707
C4	0.0409029	0.51504	0.00560459	3.97382	0.000442179	0.92358	0.000229435	0.0186716	0.0200048	0.000630599	0.000934377	0.473028	0.000321769	0.0304663	0.0304902	3.7125e-05	3.04547e-05
C5	0.0438343	0.00328756	0.514364	0.000442179	3.96809	0.000216295	0.92405	0.000368082	0.0043434	0.020155	0.0186516	5.43457e-05	0.471794	2.33316e-05	1.55802e-05	0.0306523	0.0306083
C6	0.0191375	0.0372036	0.00266234	0.92358	0.000216295	4.08278	0.000198868	0.00655526	0.00957132	0.000104406	0.000577521	0.0293557	0.000216106	0.48405	0.481378	1.76162e-05	1.29535e-05
C7	0.0209411	0.000726328	0.0362437	0.000229435	0.92405	0.000198868	4.08415	0.000151384	0.000698656	0.00951101	0.00663125	1.25109e-05	0.0298859	1.22966e-05	7.12404e-06	0.481686	0.48437
H8	0.0305065	0.465469	0.00228837	0.0186716	0.000368082	0.00655526	0.000151384	0.409191	0.0156505	0.00243422	0.00018279	0.00518022	0.000168241	0.000489515	0.00429031	1.30406e-05	1.3691e-05
H9	0.0288943	0.462501	0.00333505	0.0200048	0.0043434	0.00957132	0.000698656	0.0156505	0.404259	0.000637297	0.000295122	0.00155895	0.00637731	0.000802947	0.000552314	0.000187366	5.37898e-05
H10	0.029966	0.00538837	0.464427	0.000630599	0.020155	0.000104406	0.00951101	0.00243422	0.000637297	0.403295	0.0151101	0.000170982	0.00109805	1.75598e-05	2.03821e-05	0.000462711	0.000790459
H11	0.0253833	0.0047752	0.465709	0.000934377	0.0186516	0.000577521	0.00663125	0.00018279	0.000295122	0.0151101	0.399651	2.51234e-05	0.00522283	6.24227e-05	2.66718e-05	0.00443642	0.000500853
H12	0.00667978	0.0196135	0.000317534	0.473028	5.43457e-05	0.0293557	1.25109e-05	0.00518022	0.00155895	0.000170982	2.51234e-05	0.409515	1.47139e-05	0.00366359	0.00679009	1.50952e-06	1.50982e-06
H13	0.00376561	0.00361001	0.0194206	0.000321769	0.471794	0.000216106	0.0298859	0.000168241	0.00637731	0.00109805	0.00522283	1.47139e-05	0.418835	2.80883e-05	1.08053e-05	0.00677285	0.00371459
H14	0.00110389	0.00639496	0.000242462	0.0304663	2.33316e-05	0.48405	1.22966e-05	0.000489515	0.000802947	1.75598e-05	6.24227e-05	0.00366359	2.80883e-05	0.411609	0.016928	2.66456e-06	1.68701e-06
H15	0.00121839	0.00634197	0.000121084	0.0304902	1.55802e-05	0.481378	7.12404e-06	0.00429031	0.000552314	2.03821e-05	2.66718e-05	0.00679009	1.08053e-05	0.016928	0.41422	1.09874e-06	7.74935e-07
H16	0.00104462	0.000161665	0.00635685	3.7125e-05	0.0306523	1.76162e-05	0.481686	1.30406e-05	0.000187366	0.000462711	0.00443642	1.50952e-06	0.00677285	2.66456e-06	1.09874e-06	0.416649	0.0170449
H17	0.00157352	6.77598e-05	0.00628707	3.04547e-05	0.0306083	1.29535e-05	0.48437	1.3691e-05	5.37898e-05	0.000790459	0.000500853	1.50982e-06	0.00371459	1.68701e-06	7.74935e-07	0.0170449	0.413422
LDM — diallyl_monosulfide_11_LIDI_matrix
	S1	C2	C3	C4	C5	C6	C7	H8	H9	H10	H11	H12	H13	H14	H15	H16	H17
S1	14.6639	0.537875	0.538356	0.0409079	0.0438633	0.0191337	0.0209414	0.0289129	0.0305141	0.0299856	0.0253901	0.00668027	0.00376851	0.00110415	0.00121852	0.00104492	0.00157357		42.8843	19.116
C2	0.537875	4.00313	0.022383	0.515058	0.00328981	0.0372064	0.000726141	0.462417	0.465467	0.00539891	0.00477624	0.019624	0.00360483	0.00639458	0.00633979	0.00016148	6.7776e-05
C3	0.538356	0.022383	4.00795	0.00560453	0.514361	0.00266226	0.0362407	0.00334084	0.00228803	0.464427	0.465674	0.000317527	0.0194419	0.000242503	0.000121091	0.00635071	0.0062861
C4	0.0409079	0.515058	0.00560453	3.9737	0.000443066	0.923545	0.000229383	0.0199999	0.018666	0.000630538	0.000934426	0.472994	0.00032182	0.0304609	0.0304846	3.71236e-05	3.04507e-05
C5	0.0438633	0.00328981	0.514361	0.000443066	3.96817	0.000216498	0.924034	0.00434936	0.000368508	0.020152	0.0186384	5.43954e-05	0.471827	2.33891e-05	1.56003e-05	0.030642	0.03061
C6	0.0191337	0.0372064	0.00266226	0.923545	0.000216498	4.08268	0.000198817	0.00957041	0.00654597	0.000104358	0.000577522	0.0293561	0.000216121	0.484034	0.481348	1.76144e-05	1.29486e-05
C7	0.0209414	0.000726141	0.0362407	0.000229383	0.924034	0.000198817	4.0841	0.000698645	0.00015135	0.00951112	0.00663452	1.25076e-05	0.0298843	1.22956e-05	7.123e-06	0.481691	0.484356
H8	0.0289129	0.462417	0.00334084	0.0199999	0.00434936	0.00957041	0.000698645	0.404258	0.0156502	0.000637281	0.000295144	0.00155896	0.00637777	0.000802948	0.000552337	0.000187364	5.37907e-05
H9	0.0305141	0.465467	0.00228803	0.018666	0.000368508	0.00654597	0.00015135	0.0156502	0.40919	0.00243421	0.000182794	0.00518023	0.000168278	0.00048954	0.00429044	1.30398e-05	1.36912e-05
H10	0.0299856	0.00539891	0.464427	0.000630538	0.020152	0.000104358	0.00951112	0.000637281	0.00243421	0.403294	0.01511	0.000170984	0.0010982	1.75587e-05	2.03825e-05	0.000462673	0.000790482
H11	0.0253901	0.00477624	0.465674	0.000934426	0.0186384	0.000577522	0.00663452	0.000295144	0.000182794	0.01511	0.399651	2.51254e-05	0.00522289	6.2424e-05	2.66723e-05	0.00443648	0.000500863
H12	0.00668027	0.019624	0.000317527	0.472994	5.43954e-05	0.0293561	1.25076e-05	0.00155896	0.00518023	0.000170984	2.51254e-05	0.409515	1.47161e-05	0.00366361	0.0067901	1.50952e-06	1.50971e-06
H13	0.00376851	0.00360483	0.0194419	0.00032182	0.471827	0.000216121	0.0298843	0.00637777	0.000168278	0.0010982	0.00522289	1.47161e-05	0.418837	2.80926e-05	1.08069e-05	0.00677286	0.00371459
H14	0.00110415	0.00639458	0.000242503	0.0304609	2.33891e-05	0.484034	1.22956e-05	0.000802948	0.00048954	1.75587e-05	6.2424e-05	0.00366361	2.80926e-05	0.411604	0.0169282	2.66451e-06	1.68686e-06
H15	0.00121852	0.00633979	0.000121091	0.0304846	1.56003e-05	0.481348	7.123e-06	0.000552337	0.00429044	2.03825e-05	2.66723e-05	0.0067901	1.08069e-05	0.0169282	0.414218	1.09886e-06	7.74881e-07
H16	0.00104492	0.00016148	0.00635071	3.71236e-05	0.030642	1.76144e-05	0.481691	0.000187364	1.30398e-05	0.000462673	0.00443648	1.50952e-06	0.00677286	2.66451e-06	1.09886e-06	0.416647	0.0170445
H17	0.00157357	6.7776e-05	0.0062861	3.04507e-05	0.03061	1.29486e-05	0.484356	5.37907e-05	1.36912e-05	0.000790482	0.000500863	1.50971e-06	0.00371459	1.68686e-06	7.74881e-07	0.0170445	0.413422
LDM — diallyl_monosulfide_12_LIDI_matrix
	S1	C2	C3	C4	C5	C6	C7	H8	H9	H10	H11	H12	H13	H14	H15	H16	H17
S1	14.6616	0.539621	0.539568	0.043698	0.0436971	0.0209971	0.0209964	0.0297934	0.025562	0.0298149	0.0255605	0.00348961	0.0034832	0.00158195	0.00104114	0.00104083	0.00158192		42.8753	19.1224
C2	0.539621	4.00609	0.0219859	0.514175	0.00340999	0.0362324	0.000725212	0.462538	0.465321	0.00314743	0.00507931	0.0194182	0.00376533	0.00628212	0.00635489	0.000168162	6.6186e-05
C3	0.539568	0.0219859	4.00611	0.00342238	0.514099	0.000726038	0.0362233	0.00314822	0.00508	0.462556	0.465347	0.00377145	0.0194126	6.62131e-05	0.00016838	0.00635195	0.00628152
C4	0.043698	0.514175	0.00342238	3.96823	0.000481824	0.924004	0.000199731	0.0200758	0.0185743	0.00442646	0.000324608	0.471722	0.000237452	0.0305864	0.0306229	1.86715e-05	2.17642e-05
C5	0.0436971	0.00340999	0.514099	0.000481824	3.96818	0.000199776	0.923977	0.00442205	0.000324153	0.0200758	0.018558	0.000237478	0.471713	2.17628e-05	1.8668e-05	0.0306097	0.0305784
C6	0.0209971	0.0362324	0.000726038	0.924004	0.000199776	4.08343	0.000120826	0.00932415	0.00661906	0.000748123	0.000173754	0.0299412	0.000194407	0.484271	0.481626	8.33077e-06	6.68156e-06
C7	0.0209964	0.000725212	0.0362233	0.000199731	0.923977	0.000120826	4.0835	0.000747863	0.000173853	0.00932425	0.0066231	0.00019445	0.0299451	6.68158e-06	8.33237e-06	0.481641	0.484291
H8	0.0297934	0.462538	0.00314822	0.0200758	0.00442205	0.00932415	0.000747863	0.401793	0.0150895	0.000345498	0.000279855	0.00110347	0.00654318	0.000775963	0.000455278	0.000188053	5.64426e-05
H9	0.025562	0.465321	0.00508	0.0185743	0.000324153	0.00661906	0.000173853	0.0150895	0.398927	0.000279923	0.000892442	0.00521663	0.000287943	0.000500063	0.00442378	3.2757e-05	2.07612e-05
H10	0.0298149	0.00314743	0.462556	0.00442646	0.0200758	0.000748123	0.00932425	0.000345498	0.000279923	0.401787	0.0150896	0.00654513	0.00110334	5.64474e-05	0.000188071	0.000455257	0.000775964
H11	0.0255605	0.00507931	0.465347	0.000324608	0.018558	0.000173754	0.0066231	0.000279855	0.000892442	0.0150896	0.398933	0.000287971	0.00521663	2.07526e-05	3.27569e-05	0.0044231	0.000499996
H12	0.00348961	0.0194182	0.00377145	0.471722	0.000237478	0.0299412	0.00019445	0.00110347	0.00521663	0.00654513	0.000287971	0.418701	3.14077e-05	0.00371362	0.00676481	1.24284e-05	2.14047e-05
H13	0.0034832	0.00376533	0.0194126	0.000237452	0.471713	0.000194407	0.0299451	0.00654318	0.000287943	0.00110334	0.00521663	3.14077e-05	0.418697	2.13993e-05	1.24275e-05	0.00676471	0.00371351
H14	0.00158195	0.00628212	6.62131e-05	0.0305864	2.17628e-05	0.484271	6.68158e-06	0.000775963	0.000500063	5.64474e-05	2.07526e-05	0.00371362	2.13993e-05	0.413178	0.0170319	1.39841e-06	1.21578e-06
H15	0.00104114	0.00635489	0.00016838	0.0306229	1.8668e-05	0.481626	8.33237e-06	0.000455278	0.00442378	0.000188071	3.27569e-05	0.00676481	1.24275e-05	0.0170319	0.41646	1.37153e-06	1.39847e-06
H16	0.00104083	0.000168162	0.00635195	1.86715e-05	0.0306097	8.33077e-06	0.481641	0.000188053	3.2757e-05	0.000455257	0.0044231	1.24284e-05	0.00676471	1.39841e-06	1.37153e-06	0.416465	0.0170317
H17	0.00158192	6.6186e-05	0.00628152	2.17642e-05	0.0305784	6.68156e-06	0.484291	5.64426e-05	2.07612e-05	0.000775964	0.000499996	2.14047e-05	0.00371351	1.21578e-06	1.39847e-06	0.0170317	0.413185
LDM — diallyl_monosulfide_13_LIDI_matrix
	S1	C2	C3	C4	C5	C6	C7	H8	H9	H10	H11	H12	H13	H14	H15	H16	H17
S1	14.6669	0.537943	0.539981	0.0439415	0.0415741	0.0200436	0.0223813	0.0278728	0.0266912	0.0255976	0.0313803	0.00568592	0.00215753	0.00146039	0.00110171	0.00107512	0.00155608		42.8775	19.1231
C2	0.537943	4.00941	0.0223672	0.513963	0.0037831	0.0366536	0.000700325	0.462341	0.46594	0.00532382	0.00351942	0.0192497	0.00300014	0.00633293	0.00644872	0.000150722	5.25856e-05
C3	0.539981	0.0223672	4.00309	0.00178985	0.514429	0.000908377	0.0359909	0.00716296	0.00370703	0.465346	0.464858	0.000454586	0.0194703	0.000118077	0.00010242	0.00624151	0.0062833
C4	0.0439415	0.513963	0.00178985	3.97066	0.0029835	0.924004	0.000634025	0.0197459	0.018917	0.000380293	0.000418959	0.469198	0.00382594	0.0305685	0.0307165	8.12001e-05	3.79808e-05
C5	0.0415741	0.0037831	0.514429	0.0029835	3.96801	0.0004156	0.92239	0.00210672	0.000424602	0.0185225	0.0203554	0.00587268	0.470455	4.76064e-05	0.000137009	0.0304535	0.0305799
C6	0.0200436	0.0366536	0.000908377	0.924004	0.0004156	4.08801	7.58608e-05	0.00999547	0.00686107	0.000304993	0.000220064	0.0289671	0.000472195	0.484453	0.481865	1.26954e-05	7.84985e-06
C7	0.0223813	0.000700325	0.0359909	0.000634025	0.92239	7.58608e-05	4.08196	0.000377219	0.000285578	0.00655637	0.00874125	0.00160638	0.0300337	1.2052e-05	4.57487e-05	0.481393	0.48424
H8	0.0278728	0.462341	0.00716296	0.0197459	0.00210672	0.00999547	0.000377219	0.400984	0.0150341	0.000540539	0.00374985	0.000986428	0.00253543	0.000767825	0.000465059	9.89293e-05	2.62309e-05
H9	0.0266912	0.46594	0.00370703	0.018917	0.000424602	0.00686107	0.000285578	0.0150341	0.400195	0.00065322	0.000234992	0.00521361	0.000265997	0.000513013	0.00462242	2.83024e-05	2.82087e-05
H10	0.0255976	0.00532382	0.465346	0.000380293	0.0185225	0.000304993	0.00655637	0.000540539	0.00065322	0.399756	0.0150415	7.94823e-05	0.00510665	4.26534e-05	2.44491e-05	0.00420947	0.000491167
H11	0.0313803	0.00351942	0.464858	0.000418959	0.0203554	0.000220064	0.00874125	0.00374985	0.000234992	0.0150415	0.405503	6.43118e-05	0.00144801	1.89423e-05	1.39919e-05	0.000463642	0.000816196
H12	0.00568592	0.0192497	0.000454586	0.469198	0.00587268	0.0289671	0.00160638	0.000986428	0.00521361	7.94823e-05	6.43118e-05	0.40807	0.0058322	0.00364287	0.00665538	0.000135289	7.79864e-05
H13	0.00215753	0.00300014	0.0194703	0.00382594	0.470455	0.000472195	0.0300337	0.00253543	0.000265997	0.00510665	0.00144801	0.0058322	0.41709	4.03709e-05	0.000152269	0.00674436	0.00372411
H14	0.00146039	0.00633293	0.000118077	0.0305685	4.76064e-05	0.484453	1.2052e-05	0.000767825	0.000513013	4.26534e-05	1.89423e-05	0.00364287	4.03709e-05	0.413105	0.0170564	1.7159e-06	9.84481e-07
H15	0.00110171	0.00644872	0.00010242	0.0307165	0.000137009	0.481865	4.57487e-05	0.000465059	0.00462242	2.44491e-05	1.39919e-05	0.00665538	0.000152269	0.0170564	0.417338	4.22606e-06	2.9067e-06
H16	0.00107512	0.000150722	0.00624151	8.12001e-05	0.0304535	1.26954e-05	0.481393	9.89293e-05	2.83024e-05	0.00420947	0.000463642	0.000135289	0.00674436	1.7159e-06	4.22606e-06	0.414765	0.0169667
H17	0.00155608	5.25856e-05	0.0062833	3.79808e-05	0.0305799	7.84985e-06	0.48424	2.62309e-05	2.82087e-05	0.000491167	0.000816196	7.79864e-05	0.00372411	9.84481e-07	2.9067e-06	0.0169667	0.412662
Weighted Ensemble LDM (Σ w·LDM)
	S1	C2	C3	C4	C5	C6	C7	H8	H9	H10	H11	H12	H13	H14	H15	H16	H17
S1	14.6665	0.538926	0.539018	0.0425753	0.0425563	0.0212278	0.021216	0.0265923	0.0289289	0.0266111	0.0289266	0.00788484	0.00773927	0.00152719	0.00142355	0.00141291	0.00153031		42.8564	19.143
C2	0.538926	4.01234	0.0217766	0.514634	0.00666977	0.0357511	0.00372017	0.465859	0.459514	0.00524521	0.00258701	0.019593	0.000397662	0.00629741	0.00601124	0.000224318	0.000119054
C3	0.539018	0.0217766	4.01261	0.0067307	0.514697	0.0038236	0.0357948	0.00522076	0.00259359	0.46583	0.459386	0.000278936	0.0195665	0.000120697	0.000231435	0.00602639	0.00629812
C4	0.0425753	0.514634	0.0067307	3.96833	0.000952963	0.916248	0.000906544	0.0196764	0.0185341	0.000873866	0.00790021	0.472762	0.000252531	0.0303871	0.0299776	0.00118479	5.75727e-05
C5	0.0425563	0.00666977	0.514697	0.000952963	3.96821	0.00101001	0.916466	0.000848026	0.00775245	0.0197184	0.0185011	0.00019764	0.472651	5.6645e-05	0.00126004	0.0299971	0.0303964
C6	0.0212278	0.0357511	0.0038236	0.916248	0.00101001	4.09048	0.00292569	0.0092947	0.0062435	0.000537085	0.00748745	0.0291644	0.000252598	0.484571	0.4782	0.00433199	0.0001691
C7	0.021216	0.00372017	0.0357948	0.000906544	0.916466	0.00292569	4.09045	0.000426581	0.00730893	0.00945596	0.0061238	0.000184408	0.0291761	0.000161621	0.00444279	0.478241	0.484575
H8	0.0265923	0.465859	0.00522076	0.0196764	0.000848026	0.0092947	0.000426581	0.399509	0.0145948	0.000903018	0.000269707	0.00158942	0.000193254	0.000791622	0.000697124	4.91535e-05	1.32938e-05
H9	0.0289289	0.459514	0.00259359	0.0185341	0.00775245	0.0062435	0.00730893	0.0145948	0.390072	0.000257147	0.000144364	0.00484083	0.000291326	0.000460506	0.00379271	0.000331083	0.000189874
H10	0.0266111	0.00524521	0.46583	0.000873866	0.0197184	0.000537085	0.00945596	0.000903018	0.000257147	0.39916	0.0145769	3.29463e-05	0.001408	1.52053e-05	4.41827e-05	0.000537679	0.00080605
H11	0.0289266	0.00258701	0.459386	0.00790021	0.0185011	0.00748745	0.0061238	0.000269707	0.000144364	0.0145769	0.389959	0.000252933	0.00500993	0.000193887	0.00035041	0.0039757	0.000447502
H12	0.00788484	0.019593	0.000278936	0.472762	0.00019764	0.0291644	0.000184408	0.00158942	0.00484083	3.29463e-05	0.000252933	0.411153	2.7735e-05	0.00366721	0.00670984	9.99195e-05	8.4256e-06
H13	0.00773927	0.000397662	0.0195665	0.000252531	0.472651	0.000252598	0.0291761	0.000193254	0.000291326	0.001408	0.00500993	2.7735e-05	0.411283	1.20083e-05	0.000140904	0.0067072	0.00366713
H14	0.00152719	0.00629741	0.000120697	0.0303871	5.6645e-05	0.484571	0.000161621	0.000791622	0.000460506	1.52053e-05	0.000193887	0.00366721	1.20083e-05	0.413218	0.0168302	0.00016817	3.33412e-06
H15	0.00142355	0.00601124	0.000231435	0.0299776	0.00126004	0.4782	0.00444279	0.000697124	0.00379271	4.41827e-05	0.00035041	0.00670984	0.000140904	0.0168302	0.409866	0.00444002	0.000180422
H16	0.00141291	0.000224318	0.00602639	0.00118479	0.0299971	0.00433199	0.478241	4.91535e-05	0.000331083	0.000537679	0.0039757	9.99195e-05	0.0067072	0.00016817	0.00444002	0.410011	0.0168359
H17	0.00153031	0.000119054	0.00629812	5.75727e-05	0.0303964	0.0001691	0.484575	1.32938e-05	0.000189874	0.00080605	0.000447502	8.4256e-06	0.00366713	3.33412e-06	0.000180422	0.0168359	0.413265

## Sheet: Weighted_lDM
Weighted LDM — diallyl_monosulfide_1_LIDI_matrix (× 0.930874)
	S1	C2	C3	C4	C5	C6	C7	H8	H9	H10	H11	H12	H13	H14	H15	H16	H17	Total	Nloc
S1	13.6525	0.501728	0.50175	0.0396789	0.0396885	0.0198129	0.0198164	0.0245969	0.0270211	0.0245993	0.0270126	0.00738169	0.00738077	0.00142755	0.00133214	0.00133142	0.00142775	57.7136	39.8927
C2	0.501728	3.73532	0.0202605	0.479056	0.00634377	0.0332515	0.00360271	0.43383	0.427334	0.00497098	0.00230678	0.0182366	0.000256461	0.00585988	0.00558357	0.000211721	0.000111071
C3	0.50175	0.0202605	3.73546	0.00635732	0.479102	0.0036075	0.0332652	0.00497079	0.00229371	0.433838	0.427348	0.000256727	0.0182259	0.000111176	0.000213992	0.00558488	0.0058606
C4	0.0396789	0.479056	0.00635732	3.69396	0.00078174	0.852749	0.000826868	0.0183623	0.017174	0.000655906	0.00772942	0.440074	0.000188253	0.0282832	0.0278825	0.00118029	5.15966e-05
C5	0.0396885	0.00634377	0.479102	0.00078174	3.69399	0.000824941	0.852808	0.00065496	0.00768897	0.0183636	0.0171938	0.000187878	0.440063	5.14015e-05	0.00118097	0.0278804	0.0282882
C6	0.0198129	0.0332515	0.0036075	0.852749	0.000824941	3.80809	0.00276884	0.00882796	0.00561879	0.00033695	0.00732114	0.0271431	0.000179134	0.451094	0.444988	0.00432668	0.00015592
C7	0.0198164	0.00360271	0.0332652	0.000826868	0.852808	0.00276884	3.80813	0.000336838	0.00728624	0.00882834	0.00562433	0.000178818	0.0271449	0.000155707	0.00433109	0.444942	0.451102
H8	0.0245969	0.43383	0.00497079	0.0183623	0.00065496	0.00882796	0.000336838	0.371658	0.0135464	0.000851674	0.000207764	0.00126925	1.96112e-05	0.00075606	0.000448428	3.21262e-05	9.42388e-06
H9	0.0270211	0.427334	0.00229371	0.017174	0.00768897	0.00561879	0.00728624	0.0135464	0.362378	0.000207224	0.000111657	0.00470336	0.000243586	0.000408306	0.00371832	0.000328396	0.000187776
H10	0.0245993	0.00497098	0.433838	0.000655906	0.0183636	0.00033695	0.00882834	0.000851674	0.000207224	0.371664	0.0135461	1.96524e-05	0.00126944	9.41642e-06	3.23395e-05	0.000448256	0.000756057
H11	0.0270126	0.00230678	0.427348	0.00772942	0.0171938	0.00732114	0.00562433	0.000207764	0.000111657	0.0135461	0.362351	0.000245032	0.00470271	0.000188891	0.000334709	0.00372147	0.000408862
H12	0.00738169	0.0182366	0.000256727	0.440074	0.000187878	0.0271431	0.000178818	0.00126925	0.00470336	1.96524e-05	0.000245032	0.382733	2.06412e-05	0.00341294	0.00623937	9.91075e-05	7.91896e-06
H13	0.00738077	0.000256461	0.0182259	0.000188253	0.440063	0.000179134	0.0271449	1.96112e-05	0.000243586	0.00126944	0.00470271	2.06412e-05	0.382734	7.92447e-06	9.91935e-05	0.00623875	0.00341297
H14	0.00142755	0.00585988	0.000111176	0.0282832	5.14015e-05	0.451094	0.000155707	0.00075606	0.000408306	9.41642e-06	0.000188891	0.00341294	7.92447e-06	0.384694	0.0156584	0.000167897	2.90294e-06
H15	0.00133214	0.00558357	0.000213992	0.0278825	0.00118097	0.444988	0.00433109	0.000448428	0.00371832	3.23395e-05	0.000334709	0.00623937	9.91935e-05	0.0156584	0.381229	0.00443389	0.000168611
H16	0.00133142	0.000211721	0.00558488	0.00118029	0.0278804	0.00432668	0.444942	3.21262e-05	0.000328396	0.000448256	0.00372147	9.91075e-05	0.00623875	0.000167897	0.00443389	0.381191	0.0156563
H17	0.00142775	0.000111071	0.0058606	5.15966e-05	0.0282882	0.00015592	0.451102	9.42388e-06	0.000187776	0.000756057	0.000408862	7.91896e-06	0.00341297	2.90294e-06	0.000168611	0.0156563	0.384697
Weighted LDM — diallyl_monosulfide_2_LIDI_matrix (× 0.0184407)
	S1	C2	C3	C4	C5	C6	C7	H8	H9	H10	H11	H12	H13	H14	H15	H16	H17	Total
S1	0.270445	0.00993582	0.00994635	0.000773919	0.00079515	0.000407906	0.000398673	0.00054827	0.000484596	0.000550205	0.000476564	0.000135912	4.8e-05	2.80815e-05	2.54617e-05	1.92554e-05	2.8962e-05	1.14331
C2	0.00993582	0.0738985	0.000394821	0.00950252	7.34003e-05	0.000661923	1.44642e-05	0.00853821	0.00858732	5.04977e-05	9.76697e-05	0.000359941	7.21602e-05	0.000116183	0.000113685	3.03516e-06	1.09029e-06
C3	0.00994635	0.000394821	0.0740016	0.000145926	0.00949171	9.02403e-05	0.000668607	3.2535e-05	9.82333e-05	0.00843047	0.0085916	5.3118e-06	0.000355307	2.60488e-06	5.2151e-06	0.000116107	0.000116209
C4	0.000773919	0.00950252	0.000145926	0.0731533	1.50668e-05	0.0168664	4.56492e-06	0.000352266	0.00036129	0.000189516	1.42276e-05	0.0087152	1.26606e-05	0.000556686	0.000560545	7.0708e-07	5.74201e-07
C5	0.00079515	7.34003e-05	0.00949171	1.50668e-05	0.0731459	1.90087e-05	0.0170305	7.38623e-05	7.73214e-06	0.000361156	0.000342701	2.6647e-06	0.00868625	7.61875e-07	2.11151e-05	0.00056378	0.000564864
C6	0.000407906	0.000661923	9.02403e-05	0.0168664	1.90087e-05	0.0754136	4.83674e-06	0.000115872	0.000169265	0.000183405	7.70666e-06	0.000536565	3.30713e-05	0.00892861	0.00886707	7.40641e-07	3.79549e-07
C7	0.000398673	1.44642e-05	0.000668607	4.56492e-06	0.0170305	4.83674e-06	0.0753056	1.39578e-05	3.77175e-06	0.000164265	0.000119777	9.41891e-07	0.000555854	2.0285e-07	3.59046e-06	0.00888315	0.00893426
H8	0.00054827	0.00853821	3.2535e-05	0.000352266	7.38623e-05	0.000115872	1.39578e-05	0.00744687	0.000276678	2.0626e-06	4.09774e-06	9.5255e-05	0.000105779	8.47812e-06	7.64992e-05	2.87427e-06	1.00027e-06
H9	0.000484596	0.00858732	9.82333e-05	0.00036129	7.73214e-06	0.000169265	3.77175e-06	0.000276678	0.00733419	4.55514e-06	1.57347e-05	2.77135e-05	6.19607e-06	1.51691e-05	9.20347e-06	5.8101e-07	4.35942e-07
H10	0.000550205	5.04977e-05	0.00843047	0.000189516	0.000361156	0.000183405	0.000164265	2.0626e-06	4.55514e-06	0.0070878	0.000266009	6.57785e-06	2.2488e-05	4.76005e-06	8.46484e-06	8.19795e-06	1.4204e-05
H11	0.000476564	9.76697e-05	0.0085916	1.42276e-05	0.000342701	7.70666e-06	0.000119777	4.09774e-06	1.57347e-05	0.000266009	0.00739566	4.09631e-07	9.56799e-05	1.81091e-07	5.78263e-07	7.921e-05	9.04973e-06
H12	0.000135912	0.000359941	5.3118e-06	0.0087152	2.6647e-06	0.000536565	9.41891e-07	9.5255e-05	2.77135e-05	6.57785e-06	4.09631e-07	0.00755477	2.95522e-06	6.71078e-05	0.000125676	1.10853e-07	1.10603e-07
H13	4.8e-05	7.21602e-05	0.000355307	1.26606e-05	0.00868625	3.30713e-05	0.000555854	0.000105779	6.19607e-06	2.2488e-05	9.56799e-05	2.95522e-06	0.00771645	2.62089e-06	3.91317e-05	0.000124392	6.86645e-05
H14	2.80815e-05	0.000116183	2.60488e-06	0.000556686	7.61875e-07	0.00892861	2.0285e-07	8.47812e-06	1.51691e-05	4.76005e-06	1.81091e-07	6.71078e-05	2.62089e-06	0.00758197	0.00031259	3.39543e-08	1.03406e-08
H15	2.54617e-05	0.000113685	5.2151e-06	0.000560545	2.11151e-05	0.00886707	3.59046e-06	7.64992e-05	9.20347e-06	8.46484e-06	5.78263e-07	0.000125676	3.91317e-05	0.00031259	0.0076707	1.19109e-06	2.92053e-07
H16	1.92554e-05	3.03516e-06	0.000116107	7.0708e-07	0.00056378	7.40641e-07	0.00888315	2.87427e-06	5.8101e-07	8.19795e-06	7.921e-05	1.10853e-07	0.000124392	3.39543e-08	1.19109e-06	0.00768384	0.000315052
H17	2.8962e-05	1.09029e-06	0.000116209	5.74201e-07	0.000564864	3.79549e-07	0.00893426	1.00027e-06	4.35942e-07	1.4204e-05	9.04973e-06	1.10603e-07	6.86645e-05	1.03406e-08	2.92053e-07	0.000315052	0.00763906
Weighted LDM — diallyl_monosulfide_3_LIDI_matrix (× 0.012341)
	S1	C2	C3	C4	C5	C6	C7	H8	H9	H10	H11	H12	H13	H14	H15	H16	H17	Total
S1	0.180981	0.00663679	0.00663582	0.000527398	0.00051329	0.000272106	0.000237707	0.000367751	0.000321907	0.000381164	0.000344456	9.3412e-05	8.67912e-05	1.869e-05	1.80695e-05	1.52216e-05	1.37612e-05	0.765145
C2	0.00663679	0.049468	0.000270669	0.00635813	6.75277e-05	0.000441791	3.15693e-05	0.00574092	0.00575068	2.24362e-05	4.87199e-05	0.000241226	3.61454e-06	7.7705e-05	7.783e-05	1.44747e-06	3.02043e-06
C3	0.00663582	0.000270669	0.0495396	8.78031e-05	0.00636445	5.96034e-05	0.000459908	4.2731e-05	6.27449e-05	0.00575784	0.00561858	3.71039e-06	0.000241879	1.70249e-06	6.26574e-06	7.84453e-05	7.9044e-05
C4	0.000527398	0.00635813	8.78031e-05	0.0489577	9.49576e-06	0.0112887	4.27103e-06	0.000236416	0.000242962	5.59476e-06	0.000131809	0.00583225	8.51435e-07	0.000372933	0.000375533	3.37604e-07	6.27643e-07
C5	0.00051329	6.75277e-05	0.00636445	9.49576e-06	0.0490257	6.36268e-06	0.0113924	5.79595e-06	1.15336e-05	0.000233336	0.000235257	4.08048e-07	0.00583735	2.29314e-07	1.06088e-06	0.000376712	0.000376648
C6	0.000272106	0.000441791	5.96034e-05	0.0112887	6.36268e-06	0.0504803	7.77653e-06	7.85535e-05	0.000113155	3.3176e-06	0.000144478	0.000357994	3.05046e-07	0.00597625	0.0059412	3.13788e-07	5.1147e-07
C7	0.000237707	3.15693e-05	0.000459908	4.27103e-06	0.0113924	7.77653e-06	0.0504114	1.01291e-06	7.37815e-06	8.09836e-05	0.000114684	1.92716e-07	0.000362498	2.77766e-07	4.15799e-07	0.00594363	0.0059768
H8	0.000367751	0.00574092	4.2731e-05	0.000236416	5.79595e-06	7.85535e-05	1.01291e-06	0.00501393	0.000186757	1.87212e-05	4.24702e-06	6.47591e-05	1.86514e-06	5.87612e-06	5.3993e-05	2.07404e-07	1.43089e-07
H9	0.000321907	0.00575068	6.27449e-05	0.000242962	1.15336e-05	0.000113155	7.37815e-06	0.000186757	0.00491425	2.26694e-06	3.99929e-06	1.82602e-05	2.27319e-07	1.00539e-05	6.16791e-06	3.44918e-07	8.24747e-07
H10	0.000381164	2.24362e-05	0.00575784	5.59476e-06	0.000233336	3.3176e-06	8.09836e-05	1.87212e-05	2.26694e-06	0.00507108	0.000185856	1.63915e-06	6.45794e-05	1.38104e-07	1.48522e-06	5.33583e-05	6.05327e-06
H11	0.000344456	4.87199e-05	0.00561858	0.000131809	0.000235257	0.000144478	0.000114684	4.24702e-06	3.99929e-06	0.000185856	0.00471968	3.35401e-06	1.86338e-05	3.6304e-06	1.31138e-05	6.59205e-06	9.41233e-06
H12	9.3412e-05	0.000241226	3.71039e-06	0.00583225	4.08048e-07	0.000357994	1.92716e-07	6.47591e-05	1.82602e-05	1.63915e-06	3.35401e-06	0.00505906	1.97612e-07	4.5e-05	8.45527e-05	3.32105e-08	1.84508e-08
H13	8.67912e-05	3.61454e-06	0.000241879	8.51435e-07	0.00583735	3.05046e-07	0.000362498	1.86514e-06	2.27319e-07	6.45794e-05	1.86338e-05	1.97612e-07	0.00506655	1.31384e-08	8.57457e-08	8.40635e-05	4.52957e-05
H14	1.869e-05	7.7705e-05	1.70249e-06	0.000372933	2.29314e-07	0.00597625	2.77766e-07	5.87612e-06	1.00539e-05	1.38104e-07	3.6304e-06	4.5e-05	1.31384e-08	0.00508012	0.000210084	1.19328e-08	1.24464e-08
H15	1.80695e-05	7.783e-05	6.26574e-06	0.000375533	1.06088e-06	0.0059412	4.15799e-07	5.3993e-05	6.16791e-06	1.48522e-06	1.31138e-05	8.45527e-05	8.57457e-08	0.000210084	0.0051348	2.65895e-08	4.73049e-08
H16	1.52216e-05	1.44747e-06	7.84453e-05	3.37604e-07	0.000376712	3.13788e-07	0.00594363	2.07404e-07	3.44918e-07	5.33583e-05	6.59205e-06	3.32105e-08	8.40635e-05	1.19328e-08	2.65895e-08	0.00512198	0.000209696
H17	1.37612e-05	3.02043e-06	7.9044e-05	6.27643e-07	0.000376648	5.1147e-07	0.0059768	1.43089e-07	8.24747e-07	6.05327e-06	9.41233e-06	1.84508e-08	4.52957e-05	1.24464e-08	4.73049e-08	0.000209696	0.00509374
Weighted LDM — diallyl_monosulfide_4_LIDI_matrix (× 0.000567724)
	S1	C2	C3	C4	C5	C6	C7	H8	H9	H10	H11	H12	H13	H14	H15	H16	H17	Total
S1	0.00832648	0.000305903	0.000304778	2.3746e-05	2.32786e-05	1.21653e-05	1.0838e-05	1.47555e-05	1.70418e-05	1.68203e-05	1.68383e-05	4.25015e-06	3.74571e-06	8.62911e-07	8.18832e-07	6.86608e-07	6.25941e-07	0.0351995
C2	0.000305903	0.00227518	1.24636e-05	0.000292225	3.14886e-06	2.04225e-05	1.52222e-06	0.000264579	0.000263553	8.14782e-07	2.80418e-06	1.11056e-05	1.50797e-07	3.59067e-06	3.58436e-06	6.80973e-08	1.39895e-07
C3	0.000304778	1.24636e-05	0.00227452	4.2662e-06	0.000292573	2.71609e-06	2.11092e-05	2.9265e-06	2.00212e-06	0.000261881	0.000263018	1.71545e-07	1.11304e-05	8.20671e-08	3.42101e-07	3.61685e-06	3.62657e-06
C4	2.3746e-05	0.000292225	4.2662e-06	0.00225318	6.04543e-07	0.000520891	9.36344e-08	1.11604e-05	1.08708e-05	3.91404e-06	5.43942e-07	0.000268305	1.36993e-07	1.72395e-05	1.7327e-05	2.00948e-08	1.30558e-08
C5	2.32786e-05	3.14886e-06	0.000292573	6.04543e-07	0.00225569	3.57888e-07	0.000524347	4.98955e-07	2.19065e-07	1.02683e-05	1.1265e-05	2.2344e-08	0.000268749	1.18227e-08	4.39738e-08	1.73034e-05	1.73227e-05
C6	1.21653e-05	2.04225e-05	2.71609e-06	0.000520891	3.57888e-07	0.00232179	2.05276e-07	5.32745e-06	3.63239e-06	3.58143e-06	7.75308e-07	1.65192e-05	1.11929e-07	0.000274997	0.000273379	2.01742e-08	1.2885e-08
C7	1.0838e-05	1.52222e-06	2.11092e-05	9.36344e-08	0.000524347	2.05276e-07	0.00231814	3.17314e-07	1.18755e-07	3.64887e-06	5.47854e-06	7.54848e-09	1.67739e-05	8.11353e-09	2.42804e-08	0.00027327	0.000274905
H8	1.47555e-05	0.000264579	2.9265e-06	1.11604e-05	4.98955e-07	5.32745e-06	3.17314e-07	0.000226443	8.52831e-06	9.66619e-08	2.16349e-07	8.21489e-07	7.08856e-09	4.62982e-07	2.84977e-07	1.49357e-08	3.92751e-08
H9	1.70418e-05	0.000263553	2.00212e-06	1.08708e-05	2.19065e-07	3.63239e-06	1.18755e-07	8.52831e-06	0.00023099	1.02589e-07	1.93812e-06	2.9859e-06	1.30854e-08	2.72169e-07	2.51399e-06	6.91739e-09	1.16637e-08
H10	1.68203e-05	8.14782e-07	0.000261881	3.91404e-06	1.02683e-05	3.58143e-06	3.64887e-06	9.66619e-08	1.02589e-07	0.000224344	8.71326e-06	1.58219e-07	2.83913e-06	9.3358e-08	1.4334e-07	2.38466e-06	2.72512e-07
H11	1.68383e-05	2.80418e-06	0.000263018	5.43942e-07	1.1265e-05	7.75308e-07	5.47854e-06	2.16349e-07	1.93812e-06	8.71326e-06	0.000230496	8.51272e-08	8.79167e-07	3.92888e-08	4.51481e-07	3.14634e-07	4.63209e-07
H12	4.25015e-06	1.11056e-05	1.71545e-07	0.000268305	2.2344e-08	1.65192e-05	7.54848e-09	8.21489e-07	2.9859e-06	1.58219e-07	8.51272e-08	0.000232899	5.73558e-09	2.07702e-06	3.89214e-06	1.28012e-09	5.07713e-10
H13	3.74571e-06	1.50797e-07	1.11304e-05	1.36993e-07	0.000268749	1.11929e-07	1.67739e-05	7.08856e-09	1.30854e-08	2.83913e-06	8.79167e-07	5.73558e-09	0.000233713	4.58472e-09	3.7544e-09	3.86693e-06	2.08707e-06
H14	8.62911e-07	3.59067e-06	8.20671e-08	1.72395e-05	1.18227e-08	0.000274997	8.11353e-09	4.62982e-07	2.72169e-07	9.3358e-08	3.92888e-08	2.07702e-06	4.58472e-09	0.000234063	9.67367e-06	6.62192e-10	3.78351e-10
H15	8.18832e-07	3.58436e-06	3.42101e-07	1.7327e-05	4.39738e-08	0.000273379	2.42804e-08	2.84977e-07	2.51399e-06	1.4334e-07	4.51481e-07	3.89214e-06	3.7544e-09	9.67367e-06	0.000236692	1.31532e-09	2.71957e-09
H16	6.86608e-07	6.80973e-08	3.61685e-06	2.00948e-08	1.73034e-05	2.01742e-08	0.00027327	1.49357e-08	6.91739e-09	2.38466e-06	3.14634e-07	1.28012e-09	3.86693e-06	6.62192e-10	1.31532e-09	0.000234961	9.62655e-06
H17	6.25941e-07	1.39895e-07	3.62657e-06	1.30558e-08	1.73227e-05	1.2885e-08	0.000274905	3.92751e-08	1.16637e-08	2.72512e-07	4.63209e-07	5.07713e-10	2.08707e-06	3.78351e-10	2.71957e-09	9.62655e-06	0.000234252
Weighted LDM — diallyl_monosulfide_5_LIDI_matrix (× 0.000549095)
	S1	C2	C3	C4	C5	C6	C7	H8	H9	H10	H11	H12	H13	H14	H15	H16	H17	Total
S1	0.00805496	0.00029649	0.000294476	2.25547e-05	2.4192e-05	1.18982e-05	1.15666e-05	1.65826e-05	1.44246e-05	1.48001e-05	1.5021e-05	3.97312e-06	2.72486e-06	8.61674e-07	8.09131e-07	6.14382e-07	8.04474e-07	0.034044
C2	0.00029649	0.0021986	1.22895e-05	0.000282981	1.01843e-06	1.97938e-05	5.16882e-07	0.000254921	0.000255504	2.0318e-06	3.93512e-06	1.06973e-05	2.33568e-07	3.46933e-06	3.49031e-06	5.40566e-08	6.35111e-08
C3	0.000294476	1.22895e-05	0.00220117	3.10515e-06	0.000282365	1.9077e-06	2.0224e-05	1.67302e-06	2.93456e-06	0.00025605	0.000252812	1.67596e-07	1.04748e-05	6.77613e-08	3.18356e-07	3.5483e-06	3.4983e-06
C4	2.25547e-05	0.000282981	3.10515e-06	0.00217869	2.50023e-06	0.000502013	3.04587e-07	1.05743e-05	1.08199e-05	4.02394e-07	2.00275e-06	0.00025914	4.50468e-06	1.66354e-05	1.67148e-05	9.81322e-08	3.03985e-08
C5	2.4192e-05	1.01843e-06	0.000282365	2.50023e-06	0.00217962	1.75177e-06	0.00050708	2.16655e-07	2.07062e-07	1.03681e-05	1.06648e-05	3.30843e-07	0.000257166	5.15685e-08	6.56874e-08	1.68842e-05	1.68072e-05
C6	1.18982e-05	1.97938e-05	1.9077e-06	0.000502013	1.75177e-06	0.00224486	2.21981e-07	3.57215e-06	5.29843e-06	1.98391e-07	2.56859e-06	1.58904e-05	3.41802e-06	0.00026586	0.000264277	7.61378e-08	1.77491e-08
C7	1.15666e-05	5.16882e-07	2.0224e-05	3.04587e-07	0.00050708	2.21981e-07	0.00224564	1.11317e-07	1.70522e-07	3.70064e-06	5.22658e-06	3.56404e-08	1.57006e-05	1.65346e-08	2.24887e-08	0.000264759	0.000266184
H8	1.65826e-05	0.000254921	1.67302e-06	1.05743e-05	2.16655e-07	3.57215e-06	1.11317e-07	0.000223203	8.22234e-06	1.13024e-07	1.75171e-06	2.89504e-06	4.45217e-08	2.65019e-07	2.4573e-06	7.20618e-09	9.58265e-09
H9	1.44246e-05	0.000255504	2.93456e-06	1.08199e-05	2.07062e-07	5.29843e-06	1.70522e-07	8.22234e-06	0.000218484	3.62038e-07	2.91649e-07	7.64827e-07	3.20406e-08	4.48025e-07	2.7953e-07	1.33814e-08	2.3646e-08
H10	1.48001e-05	2.0318e-06	0.00025605	4.02394e-07	1.03681e-05	1.98391e-07	3.70064e-06	1.13024e-07	3.62038e-07	0.000220597	8.15009e-06	5.01157e-08	2.8402e-06	9.09377e-09	2.76959e-08	2.50638e-06	2.76125e-07
H11	1.5021e-05	3.93512e-06	0.000252812	2.00275e-06	1.06648e-05	2.56859e-06	5.22658e-06	1.75171e-06	2.91649e-07	8.15009e-06	0.000216654	9.29645e-08	6.36713e-07	8.45532e-08	7.40911e-07	2.5329e-07	4.23049e-07
H12	3.97312e-06	1.06973e-05	1.67596e-07	0.00025914	3.30843e-07	1.58904e-05	3.56404e-08	2.89504e-06	7.64827e-07	5.01157e-08	9.29645e-08	0.000224595	7.22185e-07	1.99515e-06	3.75537e-06	1.73997e-08	6.33313e-09
H13	2.72486e-06	2.33568e-07	1.04748e-05	4.50468e-06	0.000257166	3.41802e-06	1.57006e-05	4.45217e-08	3.20406e-08	2.8402e-06	6.36713e-07	7.22185e-07	0.000221345	1.66754e-07	8.68827e-08	3.63202e-06	1.97777e-06
H14	8.61674e-07	3.46933e-06	6.77613e-08	1.66354e-05	5.15685e-08	0.00026586	1.65346e-08	2.65019e-07	4.48025e-07	9.09377e-09	8.45532e-08	1.99515e-06	1.66754e-07	0.000225925	9.32057e-06	3.46507e-09	1.301e-09
H15	8.09131e-07	3.49031e-06	3.18356e-07	1.67148e-05	6.56874e-08	0.000264277	2.24887e-08	2.4573e-06	2.7953e-07	2.76959e-08	7.40911e-07	3.75537e-06	8.68827e-08	9.32057e-06	0.000228534	2.38823e-09	2.00329e-09
H16	6.14382e-07	5.40566e-08	3.5483e-06	9.81322e-08	1.68842e-05	7.61378e-08	0.000264759	7.20618e-09	1.33814e-08	2.50638e-06	2.5329e-07	1.73997e-08	3.63202e-06	3.46507e-09	2.38823e-09	0.00022982	9.42346e-06
H17	8.04474e-07	6.35111e-08	3.4983e-06	3.03985e-08	1.68072e-05	1.77491e-08	0.000266184	9.58265e-09	2.3646e-08	2.76125e-07	4.23049e-07	6.33313e-09	1.97777e-06	1.301e-09	2.00329e-09	9.42346e-06	0.000227704
Weighted LDM — diallyl_monosulfide_6_LIDI_matrix (× 0.0204335)
	S1	C2	C3	C4	C5	C6	C7	H8	H9	H10	H11	H12	H13	H14	H15	H16	H17	Total
S1	0.299956	0.0109907	0.0110461	0.000860022	0.00077904	0.000388665	0.000390055	0.000551565	0.000570485	0.000548912	0.000626986	0.000154368	0.000152632	3.24042e-05	2.58536e-05	2.80323e-05	3.23803e-05	1.26688
C2	0.0109907	0.0819426	0.000450398	0.0104929	0.000123317	0.00073125	5.57403e-05	0.00944408	0.0095245	0.000110025	4.80899e-05	0.000404094	6.83749e-06	0.000129235	0.000122558	5.30946e-06	2.40778e-06
C3	0.0110461	0.000450398	0.081827	3.98943e-05	0.0105247	1.79629e-05	0.000750418	0.000120181	8.53866e-05	0.00948589	0.00949263	6.53733e-06	0.000395279	1.07431e-06	3.26364e-06	0.000133139	0.000129483
C4	0.000860022	0.0104929	3.98943e-05	0.0810974	0.000134978	0.0188108	6.62274e-05	0.000376898	0.000411564	6.92736e-06	7.47429e-06	0.00966956	4.00635e-05	0.00062871	0.000612925	2.71239e-06	4.18946e-06
C5	0.00077904	0.000123317	0.0105247	0.000134978	0.0809668	0.000153692	0.0186857	6.75385e-05	1.37566e-05	0.000402906	0.000392583	4.00641e-06	0.00961349	3.76262e-06	5.64817e-05	0.00062749	0.000618635
C6	0.000388665	0.00073125	1.79629e-05	0.0188108	0.000153692	0.0833583	0.000140046	0.000123192	0.000202543	7.4575e-06	1.72766e-06	0.000601172	3.31069e-05	0.00990186	0.00978163	3.85671e-06	1.20099e-05
C7	0.000390055	5.57403e-05	0.000750418	6.62274e-05	0.0186857	0.000140046	0.0834464	6.63538e-05	5.44357e-06	0.000218573	0.000139947	3.74975e-06	0.000578808	5.1715e-06	0.0001075	0.00984502	0.00988686
H8	0.000551565	0.00944408	0.000120181	0.000376898	6.75385e-05	0.000123192	6.63538e-05	0.00811928	0.000305561	8.75317e-06	4.47094e-05	0.00010582	2.60671e-06	9.14729e-06	8.06658e-05	1.20003e-05	2.04839e-06
H9	0.000570485	0.0095245	8.53866e-05	0.000411564	1.37566e-05	0.000202543	5.44357e-06	0.000305561	0.00816145	1.55503e-05	3.76047e-06	2.54679e-05	1.31749e-06	1.5873e-05	9.59271e-06	4.62244e-07	3.284e-07
H10	0.000548912	0.000110025	0.00948589	6.92736e-06	0.000402906	7.4575e-06	0.000218573	8.75317e-06	1.55503e-05	0.00811885	0.000307869	2.80451e-07	2.25788e-05	4.5714e-07	1.33049e-06	1.08238e-05	1.62388e-05
H11	0.000626986	4.80899e-05	0.00949263	7.47429e-06	0.000392583	1.72766e-06	0.000139947	4.47094e-05	3.76047e-06	0.000307869	0.00832311	3.44937e-06	0.000108003	8.4878e-08	3.87563e-07	9.78626e-05	1.05352e-05
H12	0.000154368	0.000404094	6.53733e-06	0.00966956	4.00641e-06	0.000601172	3.74975e-06	0.00010582	2.54679e-05	2.80451e-07	3.44937e-06	0.00846725	1.58529e-06	7.6557e-05	0.000138588	5.88084e-07	3.19876e-07
H13	0.000152632	6.83749e-06	0.000395279	4.00635e-05	0.00961349	3.31069e-05	0.000578808	2.60671e-06	1.31749e-06	2.25788e-05	0.000108003	1.58529e-06	0.00828488	8.35579e-07	2.19168e-06	0.000138731	7.37829e-05
H14	3.24042e-05	0.000129235	1.07431e-06	0.00062871	3.76262e-06	0.00990186	5.1715e-06	9.14729e-06	1.5873e-05	4.5714e-07	8.4878e-08	7.6557e-05	8.35579e-07	0.00848805	0.000345693	1.79121e-07	3.75818e-07
H15	2.58536e-05	0.000122558	3.26364e-06	0.000612925	5.64817e-05	0.00978163	0.0001075	8.06658e-05	9.59271e-06	1.33049e-06	3.87563e-07	0.000138588	2.19168e-06	0.000345693	0.00840868	4.89366e-06	1.14519e-05
H16	2.80323e-05	5.30946e-06	0.000133139	2.71239e-06	0.00062749	3.85671e-06	0.00984502	1.20003e-05	4.62244e-07	1.08238e-05	9.78626e-05	5.88084e-07	0.000138731	1.79121e-07	4.89366e-06	0.00855565	0.000349664
H17	3.23803e-05	2.40778e-06	0.000129483	4.18946e-06	0.000618635	1.20099e-05	0.00988686	2.04839e-06	3.284e-07	1.62388e-05	1.05352e-05	3.19876e-07	7.37829e-05	3.75818e-07	1.14519e-05	0.000349664	0.00843208
Weighted LDM — diallyl_monosulfide_7_LIDI_matrix (× 0.000400214)
	S1	C2	C3	C4	C5	C6	C7	H8	H9	H10	H11	H12	H13	H14	H15	H16	H17	Total
S1	0.00586971	0.000214744	0.000214717	1.62941e-05	1.62904e-05	7.60215e-06	7.60203e-06	1.21957e-05	1.17223e-05	1.17112e-05	1.22041e-05	2.68537e-06	2.68577e-06	4.37533e-07	4.86287e-07	4.86311e-07	4.37468e-07	0.0248127
C2	0.000214744	0.00160284	9.06092e-06	0.000206264	2.16786e-06	1.4887e-05	9.98245e-07	0.000186333	0.000185842	2.11035e-06	9.10392e-07	7.83767e-06	1.20409e-07	2.55841e-06	2.53786e-06	4.58833e-08	9.26671e-08
C3	0.000214717	9.06092e-06	0.00160276	2.16847e-06	0.000206245	9.98178e-07	1.48847e-05	9.10439e-07	2.11082e-06	0.000185828	0.000186324	1.2038e-07	7.83815e-06	9.26752e-08	4.588e-08	2.53809e-06	2.55822e-06
C4	1.62941e-05	0.000206264	2.16847e-06	0.00159025	4.1092e-07	0.000369553	2.18675e-07	7.49029e-06	8.0016e-06	2.58126e-07	1.16124e-07	0.000189338	1.27557e-08	1.21927e-05	1.2203e-05	1.09348e-08	2.59347e-08
C5	1.62904e-05	2.16786e-06	0.000206245	4.1092e-07	0.00159021	2.18636e-07	0.000369539	1.16144e-07	2.58027e-07	8.00036e-06	7.48504e-06	1.27538e-08	0.000189326	2.5934e-08	1.09332e-08	1.21967e-05	1.21912e-05
C6	7.60215e-06	1.4887e-05	9.98178e-07	0.000369553	2.18636e-07	0.00163407	2.98052e-07	2.62599e-06	3.8885e-06	3.77825e-08	6.22967e-08	1.17639e-05	1.08927e-08	0.00019374	0.000192665	1.18716e-08	2.079e-08
C7	7.60203e-06	9.98245e-07	1.48847e-05	2.18675e-07	0.000369539	2.98052e-07	0.00163407	6.22998e-08	3.77879e-08	3.88876e-06	2.62753e-06	1.08933e-08	1.1762e-05	2.07906e-08	1.18716e-08	0.000192668	0.000193734
H8	1.21957e-05	0.000186333	9.10439e-07	7.49029e-06	1.16144e-07	2.62599e-06	6.22998e-08	0.000163869	6.29771e-06	9.77634e-07	9.35726e-08	2.07499e-06	1.35186e-08	1.96188e-07	1.72033e-06	3.99078e-09	5.39214e-09
H9	1.17223e-05	0.000185842	2.11082e-06	8.0016e-06	2.58027e-07	3.8885e-06	3.77879e-08	6.29771e-06	0.000162401	3.17547e-07	9.77648e-07	6.2139e-07	6.74607e-08	3.28238e-07	2.23562e-07	8.10869e-09	6.76207e-09
H10	1.17112e-05	2.11035e-06	0.000185828	2.58126e-07	8.00036e-06	3.77825e-08	3.88876e-06	9.77634e-07	3.17547e-07	0.000162403	6.29775e-06	6.74582e-08	6.21387e-07	6.7621e-09	8.10846e-09	2.23566e-07	3.28234e-07
H11	1.22041e-05	9.10392e-07	0.000186324	1.16124e-07	7.48504e-06	6.22967e-08	2.62753e-06	9.35726e-08	9.77648e-07	6.29775e-06	0.000163868	1.35189e-08	2.075e-06	5.39221e-09	3.99082e-09	1.72037e-06	1.96199e-07
H12	2.68537e-06	7.83767e-06	1.2038e-07	0.000189338	1.27538e-08	1.17639e-05	1.08933e-08	2.07499e-06	6.2139e-07	6.74582e-08	1.35189e-08	0.000164118	1.85922e-09	1.46732e-06	2.72044e-06	7.11628e-10	6.4114e-10
H13	2.68577e-06	1.20409e-07	7.83815e-06	1.27557e-08	0.000189326	1.08927e-08	1.1762e-05	1.35186e-08	6.74607e-08	6.21387e-07	2.075e-06	1.85922e-09	0.000164118	6.41161e-10	7.11618e-10	2.72045e-06	1.4674e-06
H14	4.37533e-07	2.55841e-06	9.26752e-08	1.21927e-05	2.5934e-08	0.00019374	2.07906e-08	1.96188e-07	3.28238e-07	6.7621e-09	5.39221e-09	1.46732e-06	6.41161e-10	0.000164817	6.77996e-06	9.35595e-10	2.10814e-09
H15	4.86287e-07	2.53786e-06	4.588e-08	1.2203e-05	1.09332e-08	0.000192665	1.18716e-08	1.72033e-06	2.23562e-07	8.10846e-09	3.99082e-09	2.72044e-06	7.11618e-10	6.77996e-06	0.000165837	5.40706e-10	9.35553e-10
H16	4.86311e-07	4.58833e-08	2.53809e-06	1.09348e-08	1.21967e-05	1.18716e-08	0.000192668	3.99078e-09	8.10869e-09	2.23566e-07	1.72037e-06	7.11628e-10	2.72045e-06	9.35595e-10	5.40706e-10	0.000165837	6.77997e-06
H17	4.37468e-07	9.26671e-08	2.55822e-06	2.59347e-08	1.21912e-05	2.079e-08	0.000193734	5.39214e-09	6.76207e-09	3.28234e-07	1.96199e-07	6.4114e-10	1.4674e-06	2.10814e-09	9.35553e-10	6.77997e-06	0.000164815
Weighted LDM — diallyl_monosulfide_8_LIDI_matrix (× 0.000400214)
	S1	C2	C3	C4	C5	C6	C7	H8	H9	H10	H11	H12	H13	H14	H15	H16	H17	Total
S1	0.0058693	0.000214864	0.000214873	1.63619e-05	1.63784e-05	7.59128e-06	7.59239e-06	1.1758e-05	1.21621e-05	1.21622e-05	1.17581e-05	2.68864e-06	2.68867e-06	4.34962e-07	4.86739e-07	4.86736e-07	4.34963e-07	0.0248136
C2	0.000214864	0.00160298	8.90264e-06	0.000206239	2.19479e-06	1.4875e-05	1.01515e-06	0.000185521	0.000186552	8.38001e-07	2.13381e-06	7.85386e-06	1.2743e-07	2.55936e-06	2.53713e-06	4.67681e-08	9.36522e-08
C3	0.000214873	8.90264e-06	0.00160296	2.19316e-06	0.000206254	1.01496e-06	1.48772e-05	2.13283e-06	8.36036e-07	0.000186563	0.000185503	1.27302e-07	7.86732e-06	9.36314e-08	4.67563e-08	2.54071e-06	2.55969e-06
C4	1.63619e-05	0.000206239	2.19316e-06	0.00159018	3.92431e-07	0.000369545	2.06605e-07	7.95314e-06	7.53455e-06	1.47975e-07	2.16772e-07	0.000189335	1.16766e-08	1.21868e-05	1.21931e-05	1.09633e-08	2.57263e-08
C5	1.63784e-05	2.19479e-06	0.000206254	3.92431e-07	0.00159025	2.06625e-07	0.000369581	2.16943e-07	1.48209e-07	7.53755e-06	7.95068e-06	1.16966e-08	0.000189355	2.57283e-08	1.09677e-08	1.21994e-05	1.21936e-05
C6	7.59128e-06	1.4875e-05	1.01496e-06	0.000369545	2.06625e-07	0.00163395	3.01742e-07	3.8727e-06	2.62968e-06	3.24623e-08	1.10659e-07	1.17772e-05	4.59232e-09	0.000193731	0.000192642	1.16061e-08	2.10323e-08
C7	7.59239e-06	1.01515e-06	1.48772e-05	2.06605e-07	0.000369581	3.01742e-07	0.00163402	1.10674e-07	3.24745e-08	2.63362e-06	3.87306e-06	4.59483e-09	1.17809e-05	2.10321e-08	1.16065e-08	0.000192655	0.000193744
H8	1.1758e-05	0.000185521	2.13283e-06	7.95314e-06	2.16943e-07	3.8727e-06	1.10674e-07	0.000162539	6.29018e-06	8.88879e-08	2.04019e-06	6.19295e-07	9.41695e-09	3.2435e-07	2.22702e-07	5.71745e-09	1.22487e-08
H9	1.21621e-05	0.000186552	8.36036e-07	7.53455e-06	1.48209e-07	2.62968e-06	3.24745e-08	6.29018e-06	0.000163804	5.21041e-07	8.88911e-08	2.08371e-06	5.98219e-08	1.97202e-07	1.72422e-06	6.23835e-09	2.18595e-09
H10	1.21622e-05	8.38001e-07	0.000186563	1.47975e-07	7.53755e-06	3.24623e-08	2.63362e-06	8.88879e-08	5.21041e-07	0.000163805	6.2902e-06	5.98201e-08	2.08372e-06	2.18581e-09	6.23835e-09	1.72425e-06	1.97203e-07
H11	1.17581e-05	2.13381e-06	0.000185503	2.16772e-07	7.95068e-06	1.10659e-07	3.87306e-06	2.04019e-06	8.88911e-08	6.2902e-06	0.000162538	9.41686e-09	6.19273e-07	1.22486e-08	5.7173e-09	2.22706e-07	3.24356e-07
H12	2.68864e-06	7.85386e-06	1.27302e-07	0.000189335	1.16966e-08	1.17772e-05	4.59483e-09	6.19295e-07	2.08371e-06	5.98201e-08	9.41686e-09	0.000164277	4.01734e-09	1.46802e-06	2.72119e-06	7.67528e-10	4.79294e-10
H13	2.68867e-06	1.2743e-07	7.86732e-06	1.16766e-08	0.000189355	4.59232e-09	1.17809e-05	9.41695e-09	5.98219e-08	2.08372e-06	6.19273e-07	4.01734e-09	0.000164277	4.79279e-10	7.67561e-10	2.72119e-06	1.468e-06
H14	4.34962e-07	2.55936e-06	9.36314e-08	1.21868e-05	2.57283e-08	0.000193731	2.10321e-08	3.2435e-07	1.97202e-07	2.18581e-09	1.22486e-08	1.46802e-06	4.79279e-10	0.000164809	6.77574e-06	9.16286e-10	2.21162e-09
H15	4.86739e-07	2.53713e-06	4.67563e-08	1.21931e-05	1.09677e-08	0.000192642	1.16065e-08	2.22702e-07	1.72422e-06	6.23835e-09	5.7173e-09	2.72119e-06	7.67561e-10	6.77574e-06	0.000165737	5.208e-10	9.16349e-10
H16	4.86736e-07	4.67681e-08	2.54071e-06	1.09633e-08	1.21994e-05	1.16061e-08	0.000192655	5.71745e-09	6.23835e-09	1.72425e-06	2.22706e-07	7.67528e-10	2.72119e-06	9.16286e-10	5.208e-10	0.000165737	6.7757e-06
H17	4.34963e-07	9.36522e-08	2.55969e-06	2.57263e-08	1.21936e-05	2.10323e-08	0.000193744	1.22487e-08	2.18595e-09	1.97203e-07	3.24356e-07	4.79294e-10	1.468e-06	2.21162e-09	9.16349e-10	6.7757e-06	0.000164809
Weighted LDM — diallyl_monosulfide_9_LIDI_matrix (× 0.000501578)
	S1	C2	C3	C4	C5	C6	C7	H8	H9	H10	H11	H12	H13	H14	H15	H16	H17	Total
S1	0.00735456	0.000269659	0.000270248	2.0918e-05	2.1445e-05	9.72999e-06	1.07581e-05	1.51158e-05	1.45901e-05	1.26861e-05	1.55226e-05	3.51141e-06	1.31383e-06	5.51045e-07	6.24359e-07	5.19137e-07	7.78522e-07	0.0310981
C2	0.000269659	0.00200882	1.09645e-05	0.000258259	2.12326e-06	1.86719e-05	3.8028e-07	0.000232952	0.000232447	2.56025e-06	2.17489e-06	9.8171e-06	2.17062e-06	3.2077e-06	3.18408e-06	8.80559e-08	2.81559e-08
C3	0.000270248	1.09645e-05	0.00200964	2.69396e-06	0.000258054	1.35878e-06	1.81614e-05	5.4823e-07	2.84469e-06	0.000233609	0.000232858	1.22343e-07	9.7617e-06	1.25456e-07	6.00102e-08	3.16931e-06	3.15612e-06
C4	2.0918e-05	0.000258259	2.69396e-06	0.00199279	3.2598e-07	0.000463103	1.51668e-07	9.36763e-06	9.92201e-06	3.99422e-07	2.1861e-07	0.000237258	2.76357e-07	1.52713e-05	1.52722e-05	2.11597e-08	1.86941e-08
C5	2.1445e-05	2.12326e-06	0.000258054	3.2598e-07	0.00199052	7.43487e-08	0.000463364	1.54439e-06	3.40289e-07	9.32775e-06	1.01656e-05	8.43197e-08	0.00023687	7.57505e-09	1.12976e-08	1.53517e-05	1.53418e-05
C6	9.72999e-06	1.86719e-05	1.35878e-06	0.000463103	7.43487e-08	0.00204808	1.26173e-07	3.31867e-06	4.85336e-06	2.57081e-07	1.29706e-07	1.47233e-05	3.49293e-08	0.00024281	0.000241407	6.67553e-09	9.35667e-09
C7	1.07581e-05	3.8028e-07	1.81614e-05	1.51668e-07	0.000463364	1.26173e-07	0.00204796	2.98601e-07	1.02897e-07	3.29979e-06	4.61386e-06	3.72991e-08	1.50784e-05	6.54948e-09	8.57486e-09	0.000241546	0.000242913
H8	1.51158e-05	0.000232952	5.4823e-07	9.36763e-06	1.54439e-06	3.31867e-06	2.98601e-07	0.000203785	7.85783e-06	1.0474e-07	9.77828e-08	2.55814e-06	2.17266e-06	2.47697e-07	2.17181e-06	6.4823e-08	2.17416e-08
H9	1.45901e-05	0.000232447	2.84469e-06	9.92201e-06	3.40289e-07	4.85336e-06	1.02897e-07	7.85783e-06	0.000203689	2.18547e-07	2.20267e-06	7.88045e-07	3.33026e-07	4.06717e-07	2.80141e-07	1.92755e-08	8.65772e-09
H10	1.26861e-05	2.56025e-06	0.000233609	3.99422e-07	9.32775e-06	2.57081e-07	3.29979e-06	1.0474e-07	2.18547e-07	0.000200768	7.53649e-06	6.24037e-09	2.60112e-06	3.3301e-08	1.25305e-08	2.18438e-06	2.48879e-07
H11	1.55226e-05	2.17489e-06	0.000232858	2.1861e-07	1.01656e-05	1.29706e-07	4.61386e-06	9.77828e-08	2.20267e-06	7.53649e-06	0.000203268	1.30981e-08	6.36996e-07	1.28495e-08	7.40597e-09	2.34795e-07	4.04754e-07
H12	3.51141e-06	9.8171e-06	1.22343e-07	0.000237258	8.43197e-08	1.47233e-05	3.72991e-08	2.55814e-06	7.88045e-07	6.24037e-09	1.30981e-08	0.000205743	6.32022e-08	1.83269e-06	3.40741e-06	2.68983e-09	3.22108e-09
H13	1.31383e-06	2.17062e-06	9.7617e-06	2.76357e-07	0.00023687	3.49293e-08	1.50784e-05	2.17266e-06	3.33026e-07	2.60112e-06	6.36996e-07	6.32022e-08	0.000209788	5.69196e-09	9.09089e-09	3.40617e-06	1.86471e-06
H14	5.51045e-07	3.2077e-06	1.25456e-07	1.52713e-05	7.57505e-09	0.00024281	6.54948e-09	2.47697e-07	4.06717e-07	3.3301e-08	1.28495e-08	1.83269e-06	5.69196e-09	0.000206499	8.48549e-06	9.4325e-10	7.30874e-10
H15	6.24359e-07	3.18408e-06	6.00102e-08	1.52722e-05	1.12976e-08	0.000241407	8.57486e-09	2.17181e-06	2.80141e-07	1.25305e-08	7.40597e-09	3.40741e-06	9.09089e-09	8.48549e-06	0.000207542	6.79706e-10	6.85313e-10
H16	5.19137e-07	8.80559e-08	3.16931e-06	2.11597e-08	1.53517e-05	6.67553e-09	0.000241546	6.4823e-08	1.92755e-08	2.18438e-06	2.34795e-07	2.68983e-09	3.40617e-06	9.4325e-10	6.79706e-10	0.000208709	8.54297e-06
H17	7.78522e-07	2.81559e-08	3.15612e-06	1.86941e-08	1.53418e-05	9.35667e-09	0.000242913	2.17416e-08	8.65772e-09	2.48879e-07	4.04754e-07	3.22108e-09	1.86471e-06	7.30874e-10	6.85313e-10	8.54297e-06	0.000207344
Weighted LDM — diallyl_monosulfide_10_LIDI_matrix (× 0.0059316)
	S1	C2	C3	C4	C5	C6	C7	H8	H9	H10	H11	H12	H13	H14	H15	H16	H17	Total
S1	0.0869798	0.00319011	0.00319314	0.00024262	0.000260008	0.000113516	0.000124214	0.000180953	0.000171389	0.000177746	0.000150563	3.96218e-05	2.23361e-05	6.54784e-06	7.22698e-06	6.19629e-06	9.33349e-06	0.367764
C2	0.00319011	0.0237462	0.000132632	0.00305501	1.95005e-05	0.000220677	4.30829e-06	0.00276098	0.00274337	3.19617e-05	2.83246e-05	0.000116339	2.14131e-05	3.79324e-05	3.7618e-05	9.58934e-07	4.01924e-07
C3	0.00319314	0.000132632	0.0237742	3.32442e-05	0.003051	1.57919e-05	0.000214983	1.35737e-05	1.97822e-05	0.00275479	0.0027624	1.88348e-06	0.000115195	1.43819e-06	7.18223e-07	3.77063e-05	3.72924e-05
C4	0.00024262	0.00305501	3.32442e-05	0.0235711	2.62283e-06	0.00547831	1.36092e-06	0.000110752	0.000118661	3.74046e-06	5.54235e-06	0.00280581	1.9086e-06	0.000180714	0.000180855	2.20211e-07	1.80645e-07
C5	0.000260008	1.95005e-05	0.003051	2.62283e-06	0.0235371	1.28297e-06	0.0054811	2.18331e-06	2.57633e-05	0.000119552	0.000110634	3.22357e-07	0.00279849	1.38394e-07	9.24157e-08	0.000181817	0.000181556
C6	0.000113516	0.000220677	1.57919e-05	0.00547831	1.28297e-06	0.0242174	1.1796e-06	3.88832e-05	5.67732e-05	6.19297e-07	3.42562e-06	0.000174126	1.28185e-06	0.00287119	0.00285534	1.04492e-07	7.6835e-08
C7	0.000124214	4.30829e-06	0.000214983	1.36092e-06	0.0054811	1.1796e-06	0.0242256	8.97948e-07	4.14415e-06	5.64155e-05	3.93339e-05	7.42098e-08	0.000177271	7.29384e-08	4.22569e-08	0.00285717	0.00287309
H8	0.000180953	0.00276098	1.35737e-05	0.000110752	2.18331e-06	3.88832e-05	8.97948e-07	0.00242716	9.28324e-05	1.44388e-05	1.08424e-06	3.0727e-05	9.97938e-07	2.9036e-06	2.54484e-05	7.73518e-08	8.12096e-08
H9	0.000171389	0.00274337	1.97822e-05	0.000118661	2.57633e-05	5.67732e-05	4.14415e-06	9.28324e-05	0.0023979	3.78019e-06	1.75055e-06	9.24704e-06	3.78276e-05	4.76276e-06	3.2761e-06	1.11138e-06	3.1906e-07
H10	0.000177746	3.19617e-05	0.00275479	3.74046e-06	0.000119552	6.19297e-07	5.64155e-05	1.44388e-05	3.78019e-06	0.00239219	8.96272e-05	1.0142e-06	6.51317e-06	1.04158e-07	1.20898e-07	2.74462e-06	4.68869e-06
H11	0.000150563	2.83246e-05	0.0027624	5.54235e-06	0.000110634	3.42562e-06	3.93339e-05	1.08424e-06	1.75055e-06	8.96272e-05	0.00237057	1.49022e-07	3.09798e-05	3.70266e-07	1.58206e-07	2.63151e-05	2.97086e-06
H12	3.96218e-05	0.000116339	1.88348e-06	0.00280581	3.22357e-07	0.000174126	7.42098e-08	3.0727e-05	9.24704e-06	1.0142e-06	1.49022e-07	0.00242908	8.72769e-08	2.1731e-05	4.02761e-05	8.95389e-09	8.95567e-09
H13	2.23361e-05	2.14131e-05	0.000115195	1.9086e-06	0.00279849	1.28185e-06	0.000177271	9.97938e-07	3.78276e-05	6.51317e-06	3.09798e-05	8.72769e-08	0.00248436	1.66609e-07	6.40926e-08	4.01738e-05	2.20335e-05
H14	6.54784e-06	3.79324e-05	1.43819e-06	0.000180714	1.38394e-07	0.00287119	7.29384e-08	2.9036e-06	4.76276e-06	1.04158e-07	3.70266e-07	2.1731e-05	1.66609e-07	0.0024415	0.00010041	1.58051e-08	1.00067e-08
H15	7.22698e-06	3.7618e-05	7.18223e-07	0.000180855	9.24157e-08	0.00285534	4.22569e-08	2.54484e-05	3.2761e-06	1.20898e-07	1.58206e-07	4.02761e-05	6.40926e-08	0.00010041	0.00245698	6.5173e-09	4.59661e-09
H16	6.19629e-06	9.58934e-07	3.77063e-05	2.20211e-07	0.000181817	1.04492e-07	0.00285717	7.73518e-08	1.11138e-06	2.74462e-06	2.63151e-05	8.95389e-09	4.01738e-05	1.58051e-08	6.5173e-09	0.00247139	0.000101103
H17	9.33349e-06	4.01924e-07	3.72924e-05	1.80645e-07	0.000181556	7.6835e-08	0.00287309	8.12096e-08	3.1906e-07	4.68869e-06	2.97086e-06	8.95567e-09	2.20335e-05	1.00067e-08	4.59661e-09	0.000101103	0.00245225
Weighted LDM — diallyl_monosulfide_11_LIDI_matrix (× 0.00904617)
	S1	C2	C3	C4	C5	C6	C7	H8	H9	H10	H11	H12	H13	H14	H15	H16	H17	Total
S1	0.132652	0.00486571	0.00487006	0.00037006	0.000396794	0.000173087	0.000189439	0.000261551	0.000276036	0.000271255	0.000229683	6.04308e-05	3.40906e-05	9.98836e-06	1.10229e-05	9.45249e-06	1.42348e-05	0.560865
C2	0.00486571	0.036213	0.00020248	0.0046593	2.97602e-05	0.000336575	6.5688e-06	0.0041831	0.00421069	4.88394e-05	4.32067e-05	0.000177522	3.26099e-05	5.78464e-05	5.73508e-05	1.46078e-06	6.13113e-07
C3	0.00487006	0.00020248	0.0362566	5.06995e-05	0.00465299	2.40833e-05	0.000327839	3.02218e-05	2.06979e-05	0.00420128	0.00421257	2.8724e-06	0.000175874	2.19372e-06	1.09541e-06	5.74496e-05	5.68651e-05
C4	0.00037006	0.0046593	5.06995e-05	0.0359468	4.00805e-06	0.00835454	2.07504e-06	0.000180922	0.000168856	5.70396e-06	8.45297e-06	0.00427878	2.91124e-06	0.000275555	0.000275768	3.35826e-07	2.75462e-07
C5	0.000396794	2.97602e-05	0.00465299	4.00805e-06	0.0358967	1.95847e-06	0.00835896	3.9345e-05	3.33358e-06	0.000182298	0.000168606	4.9207e-07	0.00426823	2.11581e-07	1.41123e-07	0.000277193	0.000276904
C6	0.000173087	0.000336575	2.40833e-05	0.00835454	1.95847e-06	0.0369326	1.79853e-06	8.65755e-05	5.92159e-05	9.44037e-07	5.22436e-06	0.000265561	1.95506e-06	0.00437866	0.00435436	1.59343e-07	1.17135e-07
C7	0.000189439	6.5688e-06	0.000327839	2.07504e-06	0.00835896	1.79853e-06	0.0369455	6.32006e-06	1.36914e-06	8.60392e-05	6.0017e-05	1.13146e-07	0.000270339	1.11228e-07	6.44359e-08	0.00435746	0.00438156
H8	0.000261551	0.0041831	3.02218e-05	0.000180922	3.9345e-05	8.65755e-05	6.32006e-06	0.00365698	0.000141574	5.76495e-06	2.66992e-06	1.41026e-05	5.76944e-05	7.26361e-06	4.99653e-06	1.69493e-06	4.86599e-07
H9	0.000276036	0.00421069	2.06979e-05	0.000168856	3.33358e-06	5.92159e-05	1.36914e-06	0.000141574	0.0037016	2.20203e-05	1.65359e-06	4.68612e-05	1.52227e-06	4.42846e-06	3.8812e-05	1.17961e-07	1.23853e-07
H10	0.000271255	4.88394e-05	0.00420128	5.70396e-06	0.000182298	9.44037e-07	8.60392e-05	5.76495e-06	2.20203e-05	0.00364826	0.000136688	1.54675e-06	9.93448e-06	1.58839e-07	1.84383e-07	4.18542e-06	7.15084e-06
H11	0.000229683	4.32067e-05	0.00421257	8.45297e-06	0.000168606	5.22436e-06	6.0017e-05	2.66992e-06	1.65359e-06	0.000136688	0.00361531	2.27289e-07	4.72472e-05	5.64698e-07	2.41282e-07	4.01331e-05	4.53089e-06
H12	6.04308e-05	0.000177522	2.8724e-06	0.00427878	4.9207e-07	0.000265561	1.13146e-07	1.41026e-05	4.68612e-05	1.54675e-06	2.27289e-07	0.00370454	1.33125e-07	3.31417e-05	6.14244e-05	1.36553e-08	1.36571e-08
H13	3.40906e-05	3.26099e-05	0.000175874	2.91124e-06	0.00426823	1.95506e-06	0.000270339	5.76944e-05	1.52227e-06	9.93448e-06	4.72472e-05	1.33125e-07	0.00378887	2.54131e-07	9.77613e-08	6.12684e-05	3.36028e-05
H14	9.98836e-06	5.78464e-05	2.19372e-06	0.000275555	2.11581e-07	0.00437866	1.11228e-07	7.26361e-06	4.42846e-06	1.58839e-07	5.64698e-07	3.31417e-05	2.54131e-07	0.00372344	0.000153136	2.41036e-08	1.52596e-08
H15	1.10229e-05	5.73508e-05	1.09541e-06	0.000275768	1.41123e-07	0.00435436	6.44359e-08	4.99653e-06	3.8812e-05	1.84383e-07	2.41282e-07	6.14244e-05	9.77613e-08	0.000153136	0.00374708	9.94048e-09	7.0097e-09
H16	9.45249e-06	1.46078e-06	5.74496e-05	3.35826e-07	0.000277193	1.59343e-07	0.00435746	1.69493e-06	1.17961e-07	4.18542e-06	4.01331e-05	1.36553e-08	6.12684e-05	2.41036e-08	9.94048e-09	0.00376906	0.000154187
H17	1.42348e-05	6.13113e-07	5.68651e-05	2.75462e-07	0.000276904	1.17135e-07	0.00438156	4.86599e-07	1.23853e-07	7.15084e-06	4.53089e-06	1.36571e-08	3.36028e-05	1.52596e-08	7.0097e-09	0.000154187	0.00373989
Weighted LDM — diallyl_monosulfide_12_LIDI_matrix (× 0.000286558)
	S1	C2	C3	C4	C5	C6	C7	H8	H9	H10	H11	H12	H13	H14	H15	H16	H17	Total
S1	0.00420141	0.000154633	0.000154617	1.2522e-05	1.25218e-05	6.01689e-06	6.01669e-06	8.53753e-06	7.325e-06	8.54369e-06	7.32458e-06	9.99977e-07	9.9814e-07	4.5332e-07	2.98347e-07	2.98259e-07	4.53312e-07	0.0177659
C2	0.000154633	0.00114798	6.30024e-06	0.000147341	9.77159e-07	1.03827e-05	2.07815e-07	0.000132544	0.000133341	9.0192e-07	1.45552e-06	5.56445e-06	1.07899e-06	1.80019e-06	1.82105e-06	4.81881e-08	1.89661e-08
C3	0.000154617	6.30024e-06	0.00114798	9.8071e-07	0.000147319	2.08052e-07	1.03801e-05	9.02146e-07	1.45571e-06	0.000132549	0.000133349	1.08074e-06	5.56283e-06	1.89739e-08	4.82506e-08	1.8202e-06	1.80002e-06
C4	1.2522e-05	0.000147341	9.8071e-07	0.00113713	1.38071e-07	0.000264781	5.72345e-08	5.75289e-06	5.32261e-06	1.26844e-06	9.30189e-08	0.000135176	6.80439e-08	8.76478e-06	8.77525e-06	5.35046e-09	6.23669e-09
C5	1.25218e-05	9.77159e-07	0.000147319	1.38071e-07	0.00113711	5.72475e-08	0.000264773	1.26717e-06	9.28885e-08	5.75287e-06	5.31793e-06	6.80512e-08	0.000135173	6.23631e-09	5.34947e-09	8.77146e-06	8.76247e-06
C6	6.01689e-06	1.03827e-05	2.08052e-07	0.000264781	5.72475e-08	0.00117014	3.46237e-08	2.67191e-06	1.89675e-06	2.14381e-07	4.97907e-08	8.57988e-06	5.5709e-08	0.000138772	0.000138014	2.38725e-09	1.91465e-09
C7	6.01669e-06	2.07815e-07	1.03801e-05	5.72345e-08	0.000264773	3.46237e-08	0.00117016	2.14306e-07	4.98191e-08	2.67194e-06	1.8979e-06	5.57212e-08	8.58101e-06	1.91466e-09	2.38771e-09	0.000138018	0.000138778
H8	8.53753e-06	0.000132544	9.02146e-07	5.75289e-06	1.26717e-06	2.67191e-06	2.14306e-07	0.000115137	4.32401e-06	9.90052e-08	8.01947e-08	3.16208e-07	1.875e-06	2.22359e-07	1.30463e-07	5.3888e-08	1.61741e-08
H9	7.325e-06	0.000133341	1.45571e-06	5.32261e-06	9.28885e-08	1.89675e-06	4.98191e-08	4.32401e-06	0.000114316	8.02141e-08	2.55736e-07	1.49487e-06	8.25123e-08	1.43297e-07	1.26767e-06	9.38679e-09	5.9493e-09
H10	8.54369e-06	9.0192e-07	0.000132549	1.26844e-06	5.75287e-06	2.14381e-07	2.67194e-06	9.90052e-08	8.02141e-08	0.000115135	4.32404e-06	1.87556e-06	3.1617e-07	1.61755e-08	5.38934e-08	1.30458e-07	2.22359e-07
H11	7.32458e-06	1.45552e-06	0.000133349	9.30189e-08	5.31793e-06	4.97907e-08	1.8979e-06	8.01947e-08	2.55736e-07	4.32404e-06	0.000114318	8.25204e-08	1.49487e-06	5.94683e-09	9.38676e-09	1.26747e-06	1.43278e-07
H12	9.99977e-07	5.56445e-06	1.08074e-06	0.000135176	6.80512e-08	8.57988e-06	5.57212e-08	3.16208e-07	1.49487e-06	1.87556e-06	8.25204e-08	0.000119982	9.00013e-09	1.06417e-06	1.93851e-06	3.56146e-09	6.13369e-09
H13	9.9814e-07	1.07899e-06	5.56283e-06	6.80439e-08	0.000135173	5.5709e-08	8.58101e-06	1.875e-06	8.25123e-08	3.1617e-07	1.49487e-06	9.00013e-09	0.000119981	6.13213e-09	3.56121e-09	1.93848e-06	1.06414e-06
H14	4.5332e-07	1.80019e-06	1.89739e-08	8.76478e-06	6.23631e-09	0.000138772	1.91466e-09	2.22359e-07	1.43297e-07	1.61755e-08	5.94683e-09	1.06417e-06	6.13213e-09	0.000118399	4.88062e-06	4.00726e-10	3.48392e-10
H15	2.98347e-07	1.82105e-06	4.82506e-08	8.77525e-06	5.34947e-09	0.000138014	2.38771e-09	1.30463e-07	1.26767e-06	5.38934e-08	9.38676e-09	1.93851e-06	3.56121e-09	4.88062e-06	0.00011934	3.93022e-10	4.00743e-10
H16	2.98259e-07	4.81881e-08	1.8202e-06	5.35046e-09	8.77146e-06	2.38725e-09	0.000138018	5.3888e-08	9.38679e-09	1.30458e-07	1.26747e-06	3.56146e-09	1.93848e-06	4.00726e-10	3.93022e-10	0.000119341	4.88058e-06
H17	4.53312e-07	1.89661e-08	1.80002e-06	6.23669e-09	8.76247e-06	1.91465e-09	0.000138778	1.61741e-08	5.9493e-09	2.22359e-07	1.43278e-07	6.13369e-09	1.06414e-06	3.48392e-10	4.00743e-10	4.88058e-06	0.000118401
Weighted LDM — diallyl_monosulfide_13_LIDI_matrix (× 0.000227927)
	S1	C2	C3	C4	C5	C6	C7	H8	H9	H10	H11	H12	H13	H14	H15	H16	H17	Total
S1	0.00334299	0.000122612	0.000123076	1.00155e-05	9.47586e-06	4.56847e-06	5.1013e-06	6.35296e-06	6.08365e-06	5.83439e-06	7.15243e-06	1.29597e-06	4.9176e-07	3.32863e-07	2.5111e-07	2.4505e-07	3.54672e-07	0.0141316
C2	0.000122612	0.000913852	5.09809e-06	0.000117146	8.6227e-07	8.35435e-06	1.59623e-07	0.00010538	0.0001062	1.21344e-06	8.02172e-07	4.38753e-06	6.83813e-07	1.44344e-06	1.46984e-06	3.43537e-08	1.19857e-08
C3	0.000123076	5.09809e-06	0.000912413	4.07955e-07	0.000117252	2.07044e-07	8.20329e-06	1.63263e-06	8.44931e-07	0.000106065	0.000105954	1.03612e-07	4.43781e-06	2.69129e-08	2.33444e-08	1.42261e-06	1.43213e-06
C4	1.00155e-05	0.000117146	4.07955e-07	0.00090502	6.80021e-07	0.000210606	1.44511e-07	4.50063e-06	4.31169e-06	8.66789e-08	9.54921e-08	0.000106943	8.72036e-07	6.96739e-06	7.00113e-06	1.85077e-08	8.65684e-09
C5	9.47586e-06	8.6227e-07	0.000117252	6.80021e-07	0.000904416	9.47264e-08	0.000210238	4.80179e-07	9.67783e-08	4.22177e-06	4.63955e-06	1.33854e-06	0.000107229	1.08508e-08	3.1228e-08	6.94118e-06	6.96998e-06
C6	4.56847e-06	8.35435e-06	2.07044e-07	0.000210606	9.47264e-08	0.000931767	1.72907e-08	2.27824e-06	1.56382e-06	6.95162e-08	5.01586e-08	6.60239e-06	1.07626e-07	0.00011042	0.00010983	2.89362e-09	1.78919e-09
C7	5.1013e-06	1.59623e-07	8.20329e-06	1.44511e-07	0.000210238	1.72907e-08	0.000930389	8.59784e-08	6.5091e-08	1.49437e-06	1.99237e-06	3.66137e-07	6.84548e-06	2.74698e-09	1.04274e-08	0.000109723	0.000110371
H8	6.35296e-06	0.00010538	1.63263e-06	4.50063e-06	4.80179e-07	2.27824e-06	8.59784e-08	9.1395e-05	3.42668e-06	1.23204e-07	8.54692e-07	2.24834e-07	5.77894e-07	1.75008e-07	1.06e-07	2.25486e-08	5.97872e-09
H9	6.08365e-06	0.0001062	8.44931e-07	4.31169e-06	9.67783e-08	1.56382e-06	6.5091e-08	3.42668e-06	9.12152e-05	1.48887e-07	5.3561e-08	1.18832e-06	6.06278e-08	1.16929e-07	1.05357e-06	6.45087e-09	6.42952e-09
H10	5.83439e-06	1.21344e-06	0.000106065	8.66789e-08	4.22177e-06	6.95162e-08	1.49437e-06	1.23204e-07	1.48887e-07	9.11151e-05	3.42836e-06	1.81162e-08	1.16394e-06	9.72186e-09	5.57262e-09	9.59451e-07	1.1195e-07
H11	7.15243e-06	8.02172e-07	0.000105954	9.54921e-08	4.63955e-06	5.01586e-08	1.99237e-06	8.54692e-07	5.3561e-08	3.42836e-06	9.2425e-05	1.46584e-08	3.3004e-07	4.31746e-09	3.18914e-09	1.05677e-07	1.86033e-07
H12	1.29597e-06	4.38753e-06	1.03612e-07	0.000106943	1.33854e-06	6.60239e-06	3.66137e-07	2.24834e-07	1.18832e-06	1.81162e-08	1.46584e-08	9.30101e-05	1.32932e-06	8.30309e-07	1.51694e-06	3.0836e-08	1.77752e-08
H13	4.9176e-07	6.83813e-07	4.43781e-06	8.72036e-07	0.000107229	1.07626e-07	6.84548e-06	5.77894e-07	6.06278e-08	1.16394e-06	3.3004e-07	1.32932e-06	9.5066e-05	9.20163e-09	3.47063e-08	1.53722e-06	8.48826e-07
H14	3.32863e-07	1.44344e-06	2.69129e-08	6.96739e-06	1.08508e-08	0.00011042	2.74698e-09	1.75008e-07	1.16929e-07	9.72186e-09	4.31746e-09	8.30309e-07	9.20163e-09	9.41577e-05	3.88762e-06	3.91099e-10	2.2439e-10
H15	2.5111e-07	1.46984e-06	2.33444e-08	7.00113e-06	3.1228e-08	0.00010983	1.04274e-08	1.06e-07	1.05357e-06	5.57262e-09	3.18914e-09	1.51694e-06	3.47063e-08	3.88762e-06	9.51225e-05	9.63232e-10	6.62515e-10
H16	2.4505e-07	3.43537e-08	1.42261e-06	1.85077e-08	6.94118e-06	2.89362e-09	0.000109723	2.25486e-08	6.45087e-09	9.59451e-07	1.05677e-07	3.0836e-08	1.53722e-06	3.91099e-10	9.63232e-10	9.45362e-05	3.86718e-06
H17	3.54672e-07	1.19857e-08	1.43213e-06	8.65684e-09	6.96998e-06	1.78919e-09	0.000110371	5.97872e-09	6.42952e-09	1.1195e-07	1.86033e-07	1.77752e-08	8.48826e-07	2.2439e-10	6.62515e-10	3.86718e-06	9.40569e-05

## Sheet: FD
Frobenius_Distance_Full_MATRIX
Confomer ID	1	2	3	4	5	6	7	8	9	10	11	12	13
1	0	0.0522662	0.0403177	0.0465293	0.0453744	0.0497859	0.0508615	0.0510738	0.0510668	0.0474767	0.0490229	0.0488792	0.0496394
2		0	0.0530449	0.0346627	0.0441639	0.0498944	0.0446627	0.0503752	0.0393307	0.039763	0.0400137	0.0373349	0.0448892
3			0	0.0452486	0.0338314	0.0573734	0.0468154	0.0444936	0.0459375	0.0444897	0.0473933	0.0488553	0.0506905
4				0	0.0385491	0.0447928	0.0327577	0.0282238	0.031607	0.037528	0.0340378	0.03632	0.0331914
5					0	0.0445524	0.0394579	0.0389127	0.0374487	0.0387207	0.04191	0.0437198	0.0394962
6						0	0.0388474	0.0439657	0.0435841	0.0449989	0.0453282	0.0461117	0.0418343
7							0	0.023316	0.0240586	0.0232615	0.0280663	0.0353232	0.0352493
8								0	0.0275192	0.0308943	0.026635	0.0355304	0.0303963
9									0	0.0236733	0.0249446	0.0313134	0.0283095
10										0	0.0219972	0.0302622	0.0358626
11											0	0.0237678	0.0315243
12												0	0.0321105
13													0
