# Supplementary material for: Comparative Analysis of Molecular Conformers Using Localization–Delocalization Matrices and Frobenius Distance
Source: Research Square preprint supplement (doi:10.21203/rs.3.rs-7999250/v1), 2025-11-18
Supplement: Supplementary file 1 [file 8d51f7669c7f083e3b1e6de2.pdf]

*Comparative Analysis of Molecular Conformers Using Localization–Delocalization Matrices and Frobenius Distance*

Pomila<sup>1</sup> and Robert Mawhinney<sup>2\*</sup>

<sup>1</sup> Department of Materials Science, Lakehead University, Thunder Bay, Ontario, Canada

<sup>2</sup> Department of Chemistry, Lakehead University, Thunder Bay, Ontario, Canada

\*Corresponding author: Robert Mawhinney ([rmawhinn@lakeheadu.ca](mailto:rmawhinn@lakeheadu.ca))

ORCID: R. Mawhinney 0000-0002-6077-240.

Pomila 0009-0008-2550-1553

Supplementary Figures — QTAIM Molecular Graphs

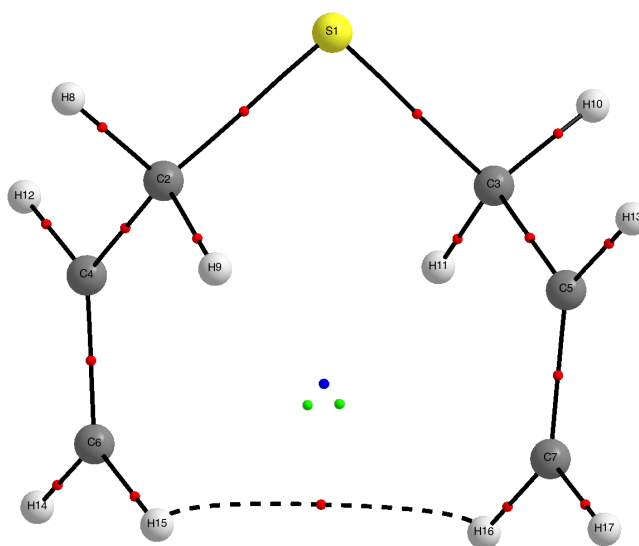

**Figure S1.** Diallyl monosulfide\_conformer\_1

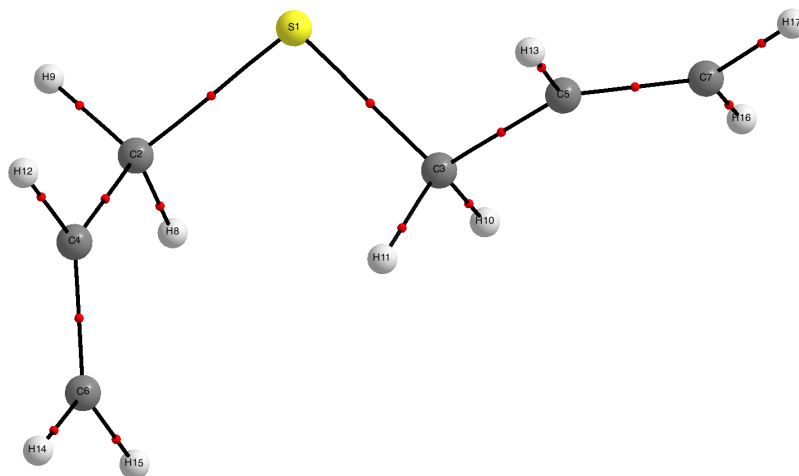

**Figure S2.** Diallyl monosulfide\_conformer\_2

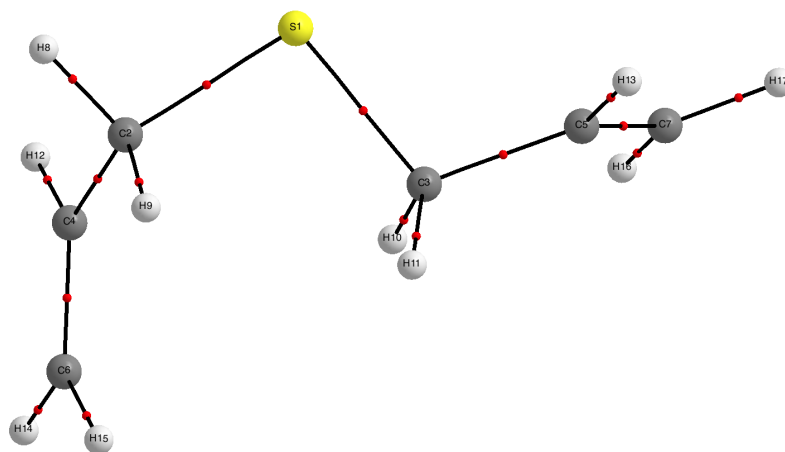

**Figure S3.** Diallyl monosulfide\_conformer\_3



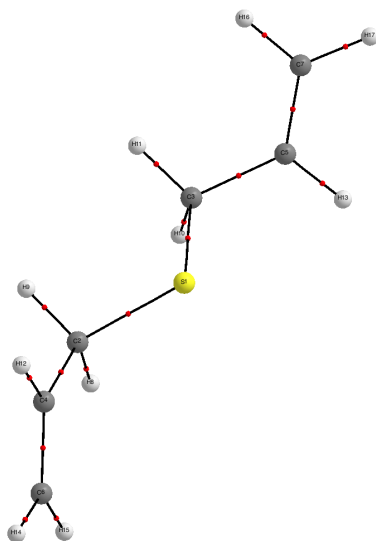

**Figure S4.** Diallyl monosulfide\_conformer\_4

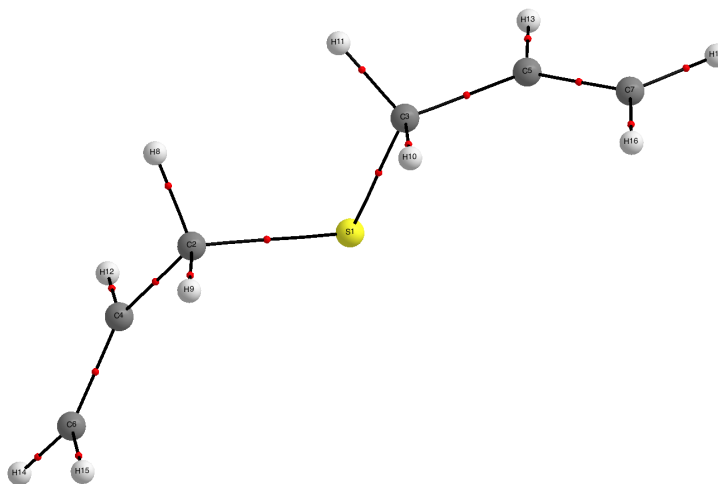

**Figure S5.** Diallyl monosulfide\_conformer\_5

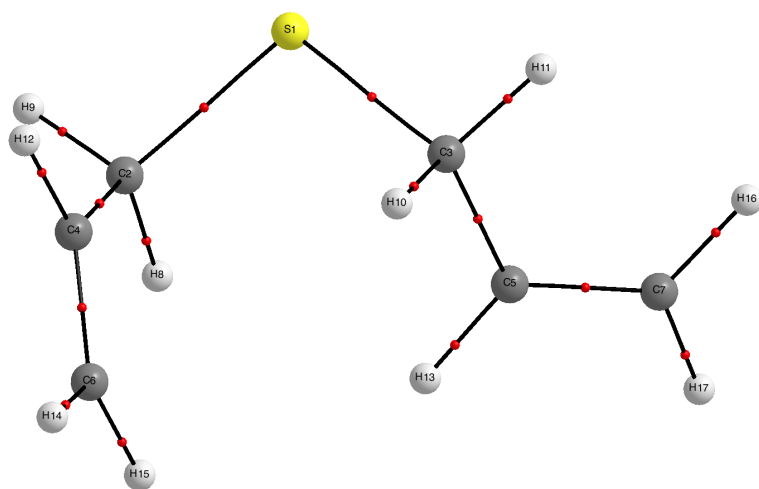

**Figure S6.** Diallyl monosulfide\_conformer\_6

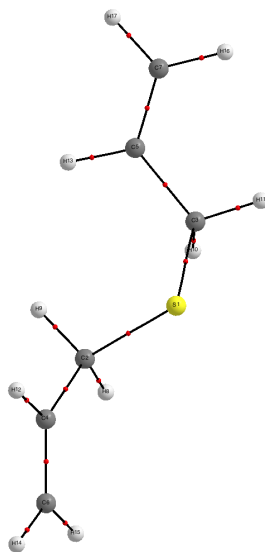

**Figure S7.** Diallyl monosulfide\_conformer\_7

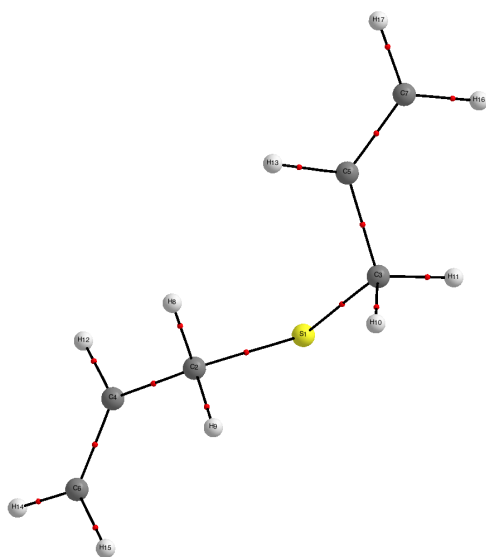

**Figure S8.** Diallyl monosulfide\_conformer\_8

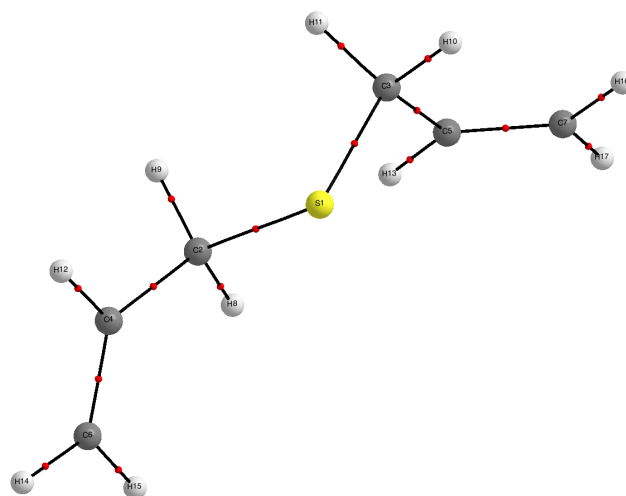

**Figure S9.** Diallyl monosulfide\_conformer\_9

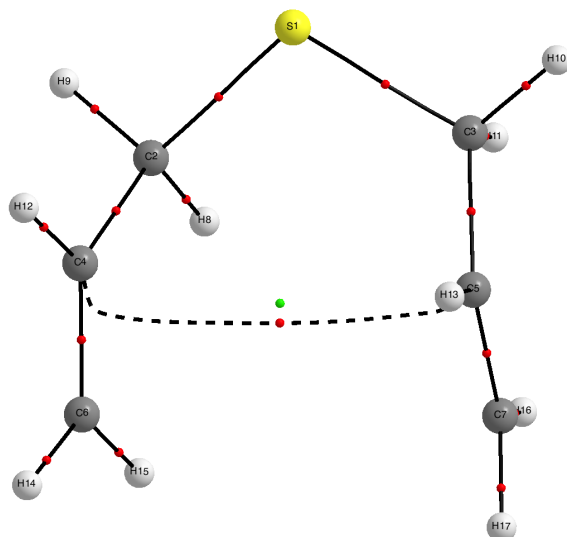

**Figure S10.** Diallyl monosulfide\_conformer\_10

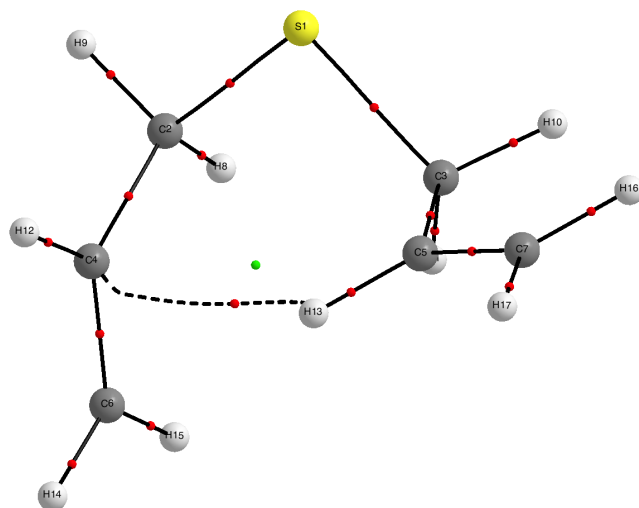

**Figure S11.** Diallyl monosulfide\_conformer\_11

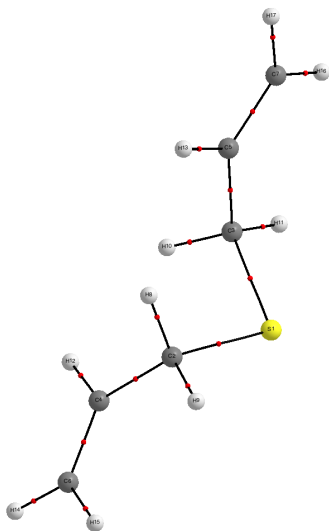

**Figure S12.** Diallyl monosulfide\_conformer\_12

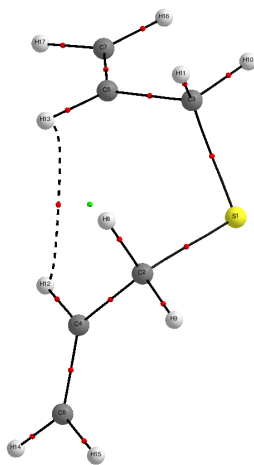

**Figure S13.** Diallyl monosulfide\_conformer\_13

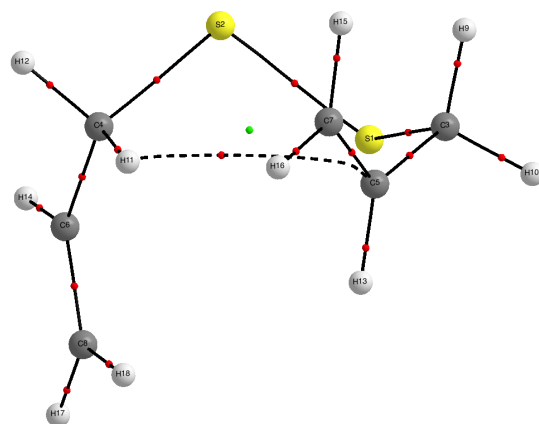

**Figure S14.** Diallyl disulfide\_conformer\_1

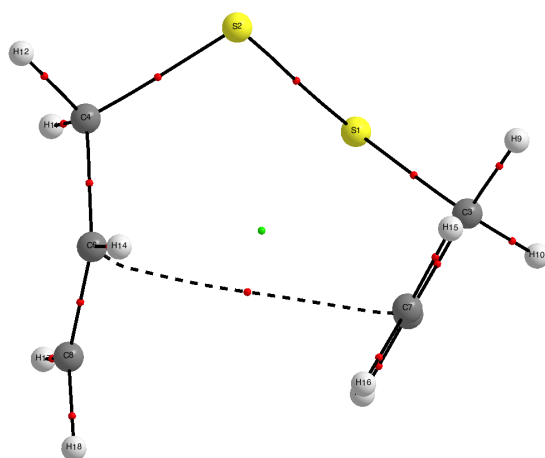

**Figure S15.** Diallyl disulfide\_conformer\_2

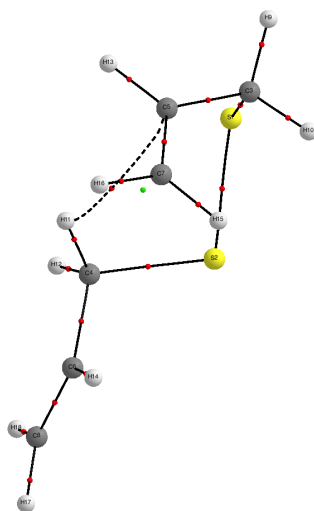

**Figure S16.** Diallyl disulfide\_conformer\_3

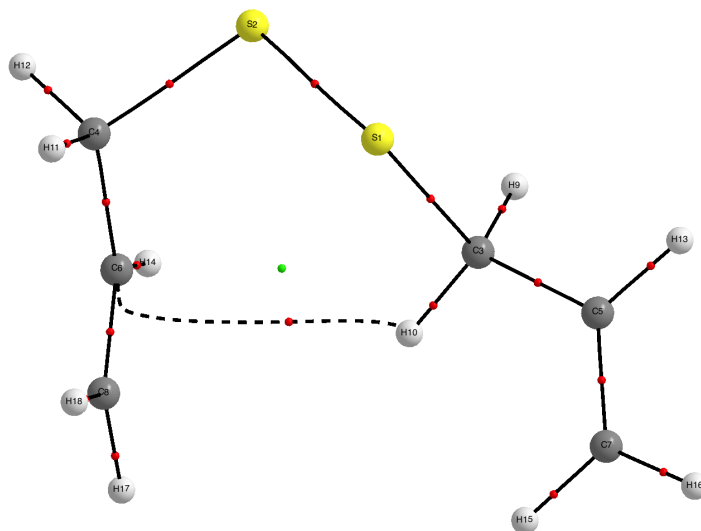

**Figure S17.** Diallyl disulfide\_conformer\_4

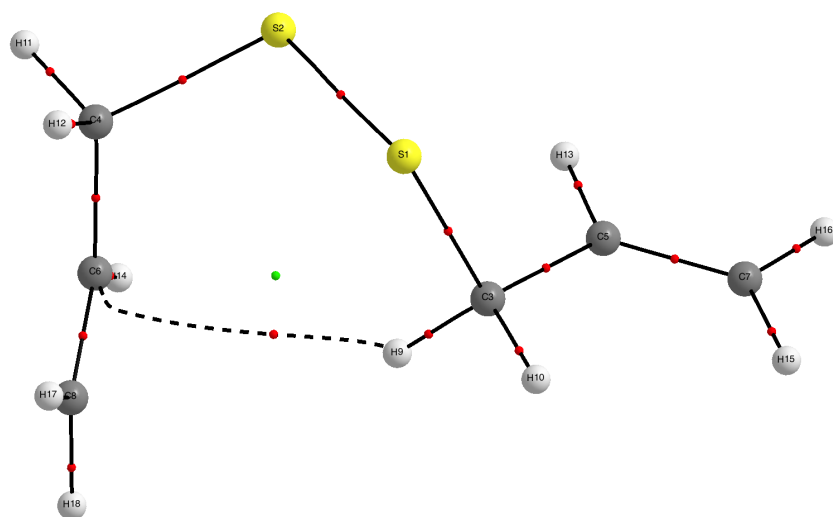

**Figure S18.** Diallyl disulfide\_conformer\_5

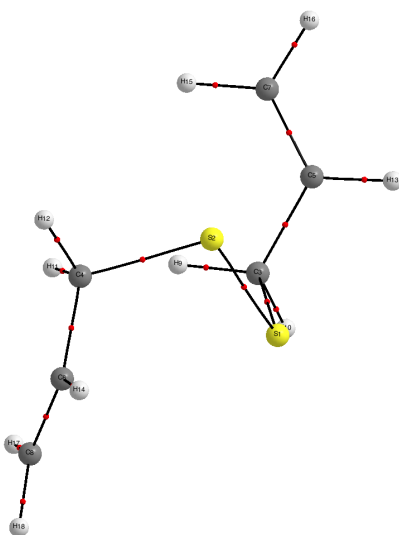

**Figure S19.** Diallyl disulfide\_conformer\_6



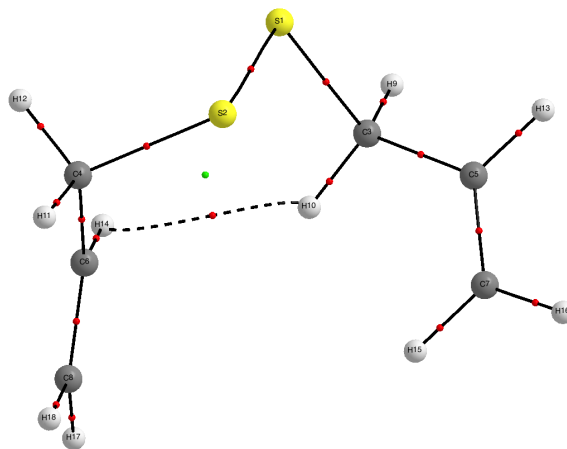

**Figure S20.** Diallyl disulfide\_conformer\_7

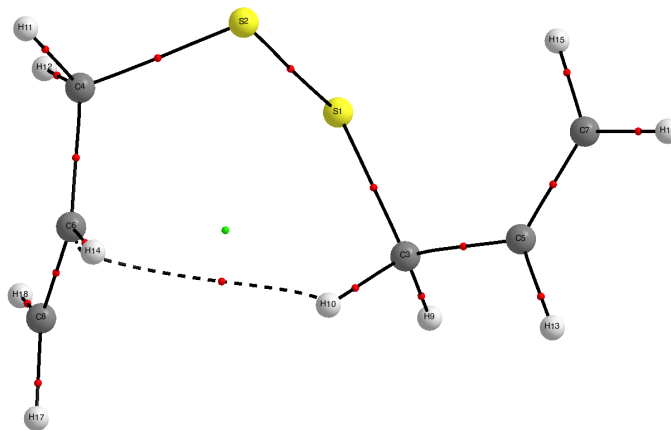

**Figure S21.** Diallyl disulfide\_conformer\_8

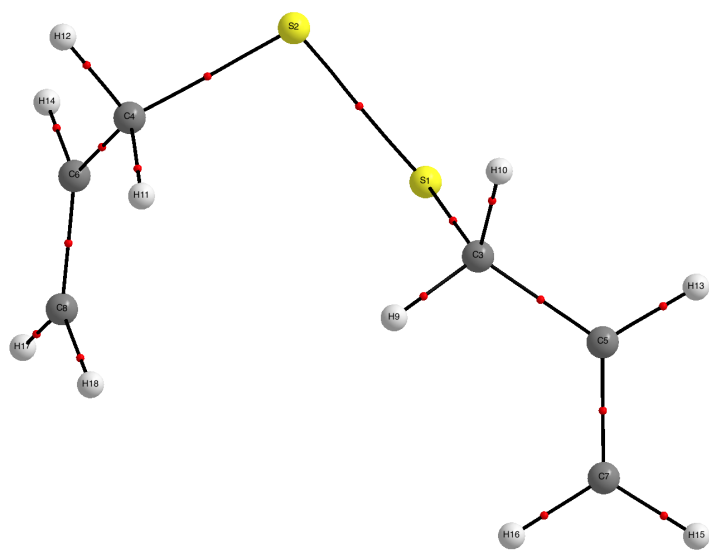

**Figure S22.** Diallyl disulfide\_conformer\_9

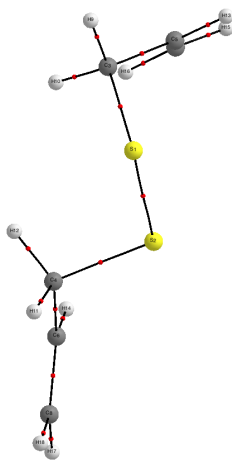

**Figure S23.** Diallyl disulfide\_conformer\_10

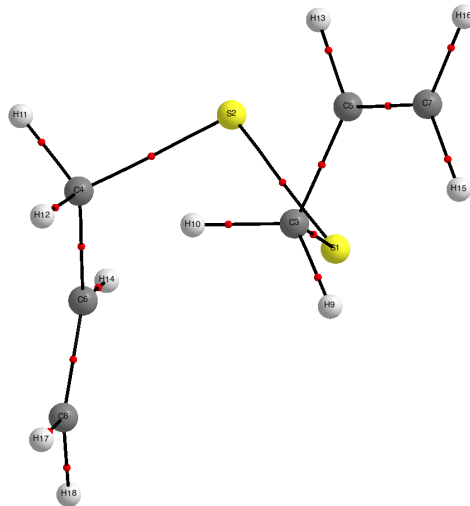

**Figure S24.** Diallyl disulfide\_conformer\_11

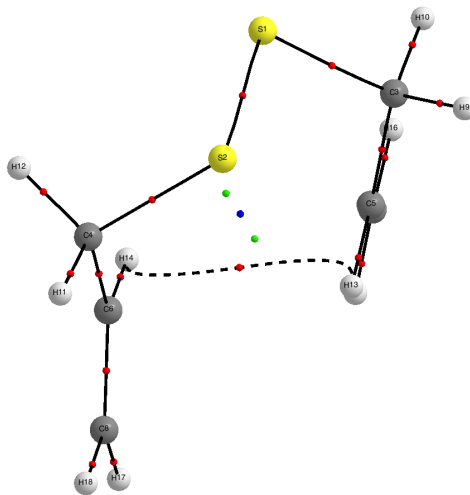

**Figure S25.** Diallyl disulfide\_conformer\_12

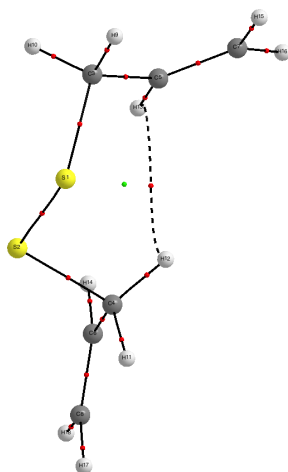

**Figure S26.** Diallyl disulfide\_conformer\_13

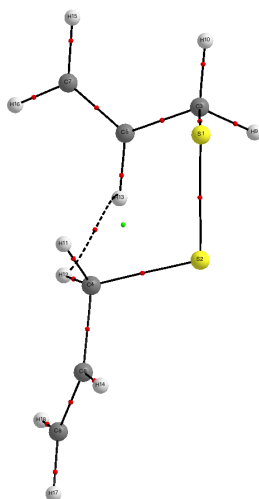

**Figure S27.** Diallyl disulfide\_conformer\_14

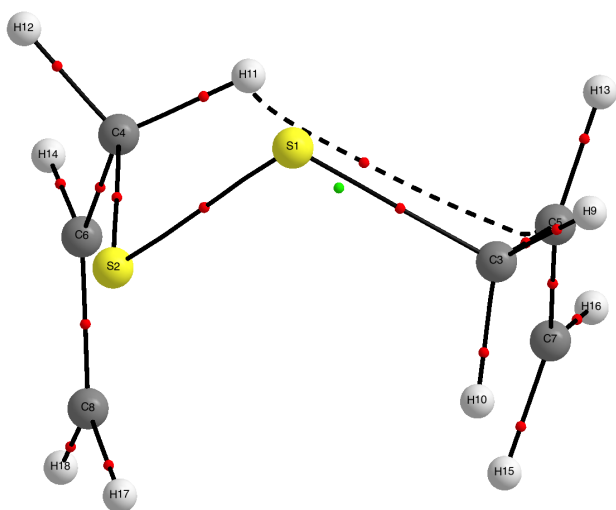

**Figure S28.** Diallyl disulfide\_conformer\_15

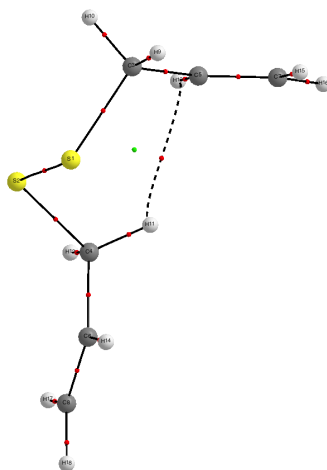

**Figure S29.** Diallyl disulfide\_conformer\_16

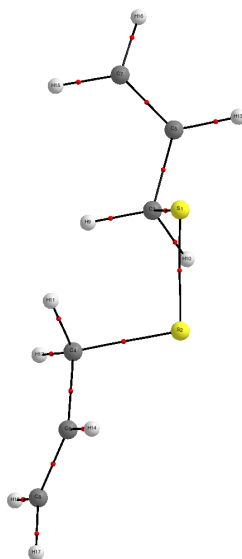

**Figure S30.** Diallyl disulfide\_conformer\_17

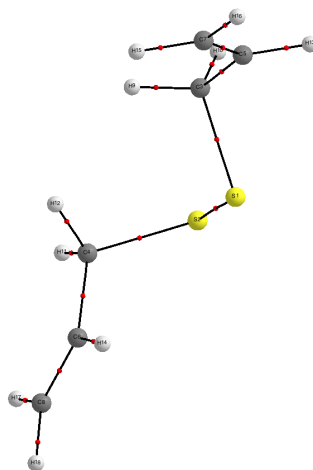

**Figure S31.** Diallyl disulfide\_conformer\_18

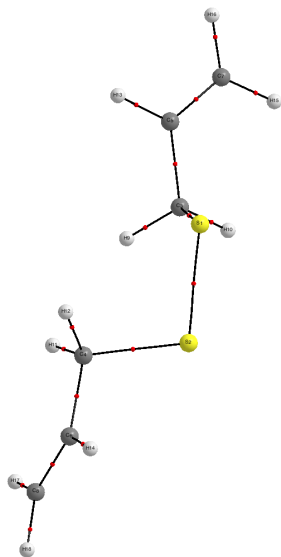

**Figure S32.** Diallyl disulfide\_conformer\_19

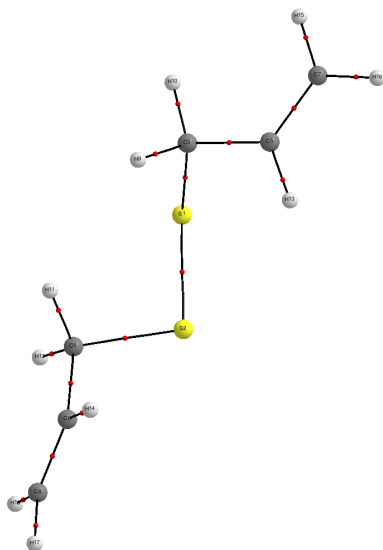

**Figure S33.** Diallyl disulfide\_conformer\_20

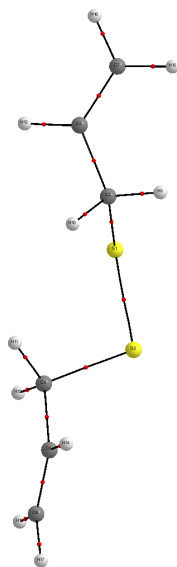

**Figure S34.** Diallyl disulfide\_conformer\_21

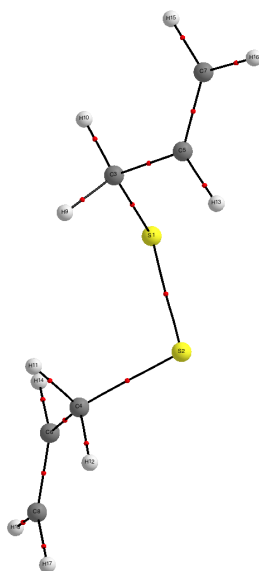

**Figure S35.** Diallyl disulfide\_conformer\_22



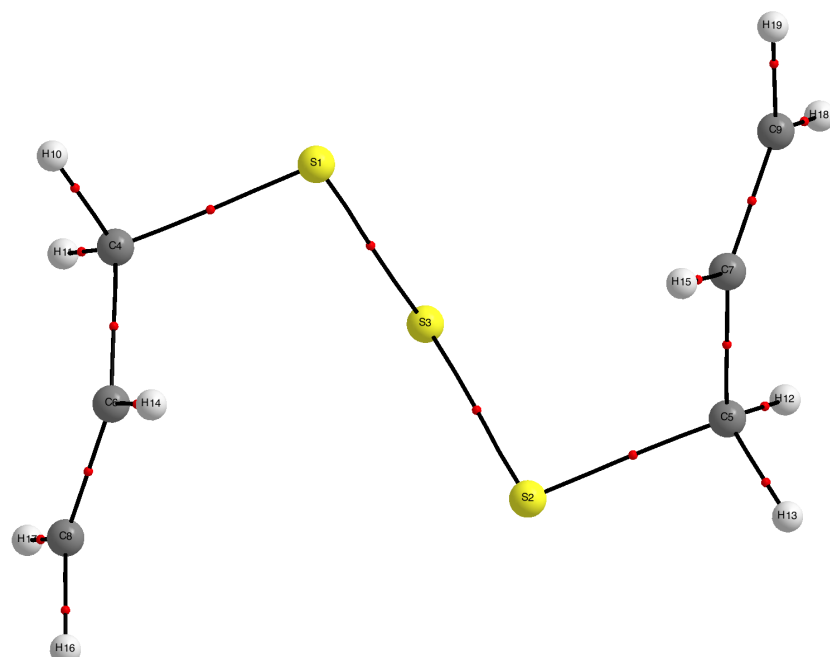

**Figure S36.** Diallyl trisulfide\_conformer\_1

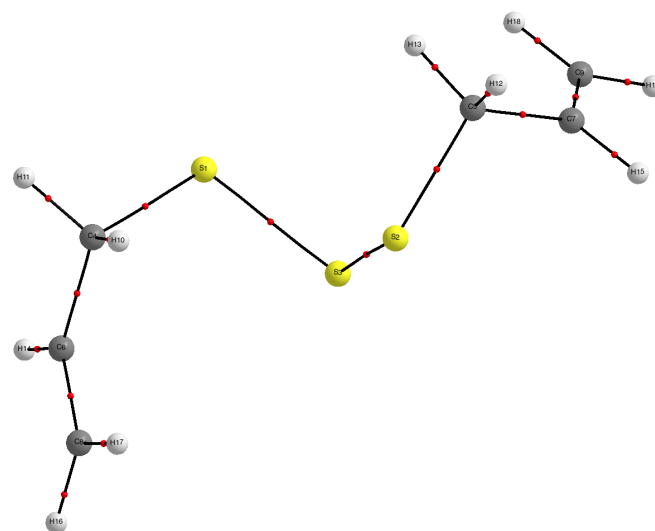

**Figure S37.** Diallyl trisulfide\_conformer\_2

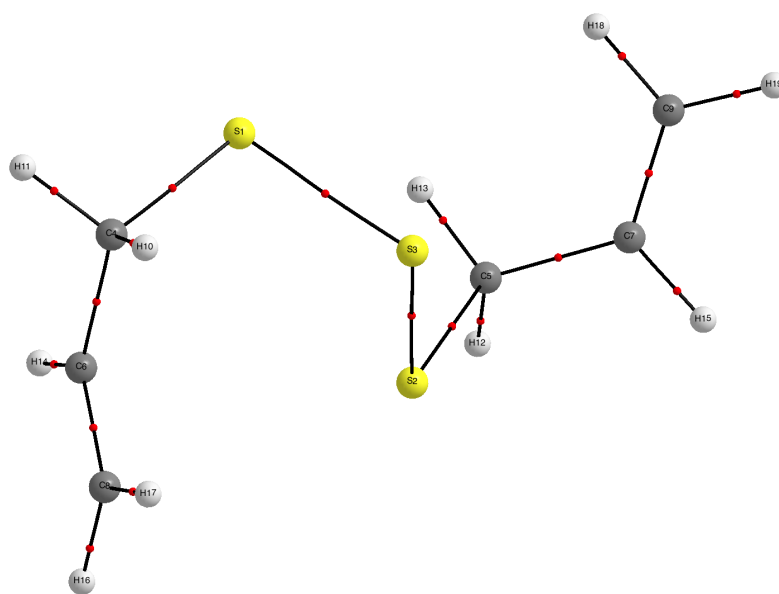

**Figure S38.** Diallyl trisulfide\_conformer\_3

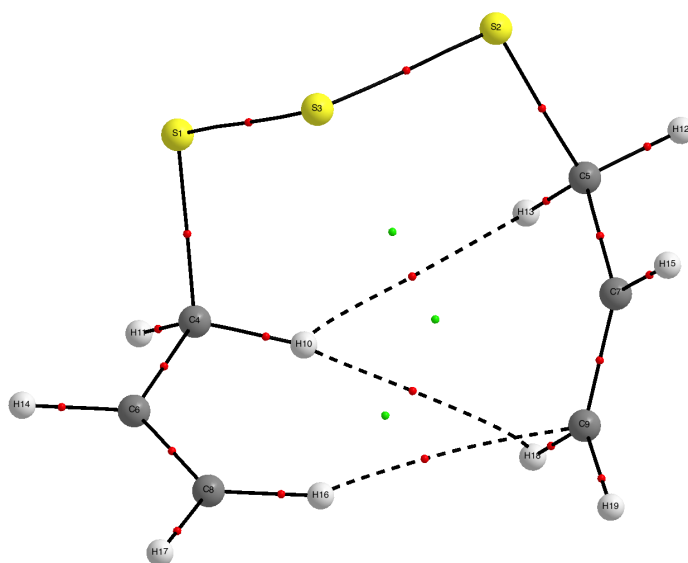

**Figure S39.** Diallyl trisulfide\_conformer\_4

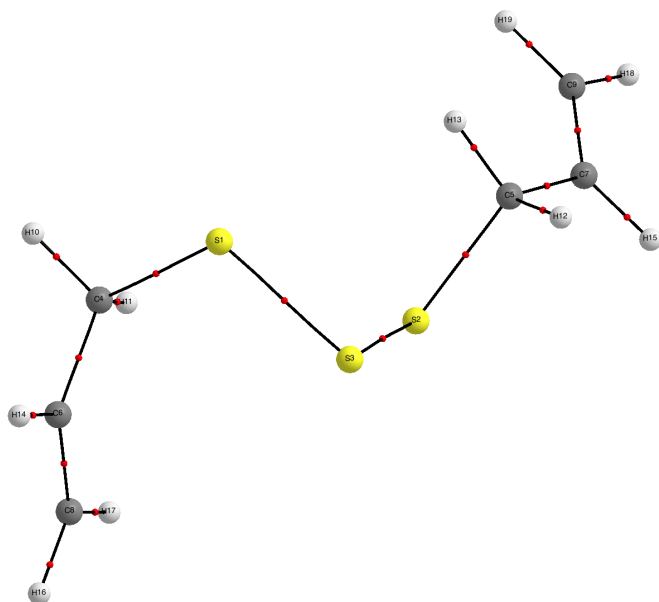

**Figure S40.** Diallyl trisulfide\_conformer\_5

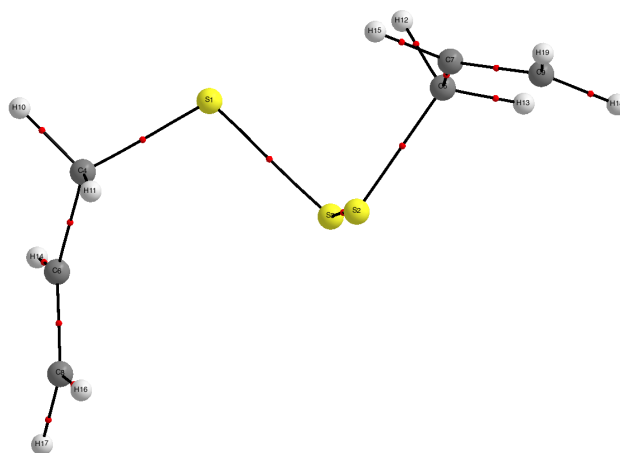

**Figure S41.** Diallyl trisulfide\_conformer\_6

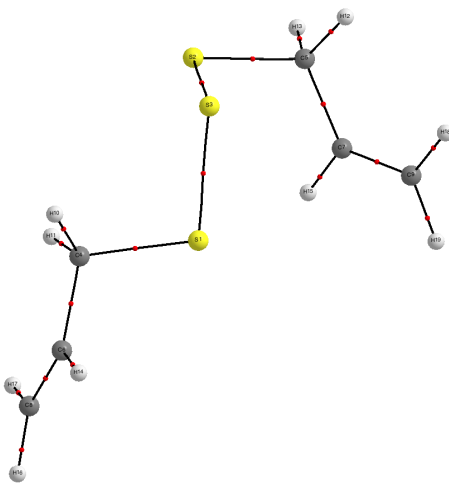

**Figure S42.** Diallyl trisulfide\_conformer\_7

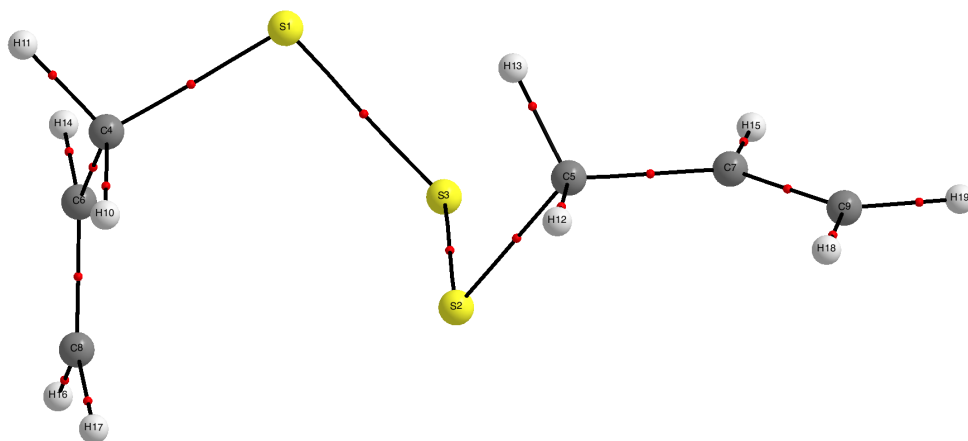

**Figure S43.** Diallyl trisulfide\_conformer\_8

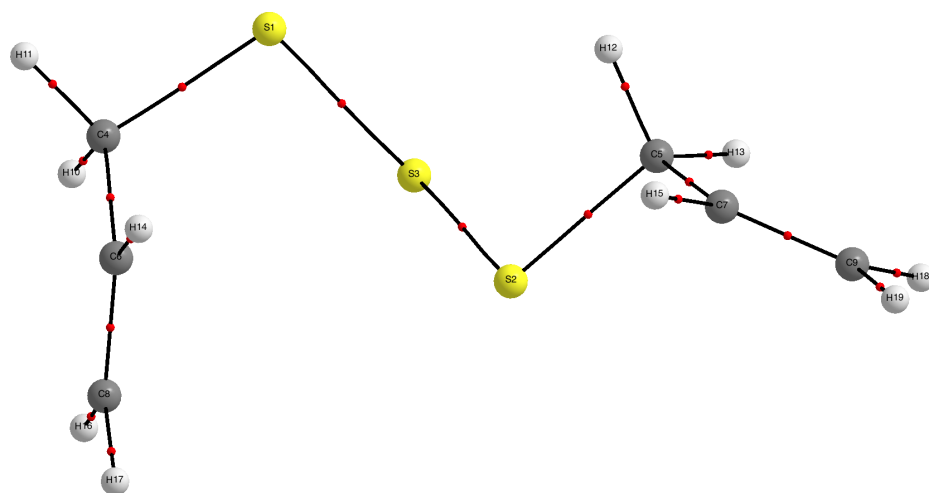

**Figure S44.** Diallyl trisulfide\_conformer\_9

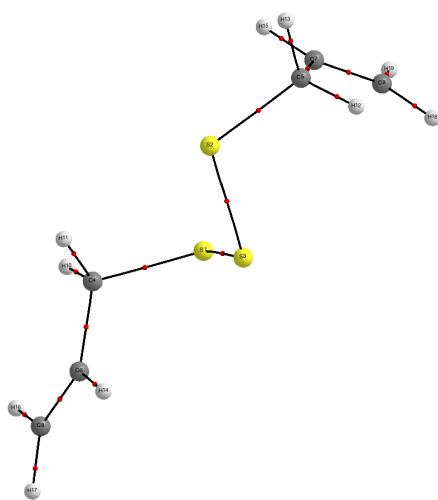

**Figure S45.** Diallyl trisulfide\_conformer\_10

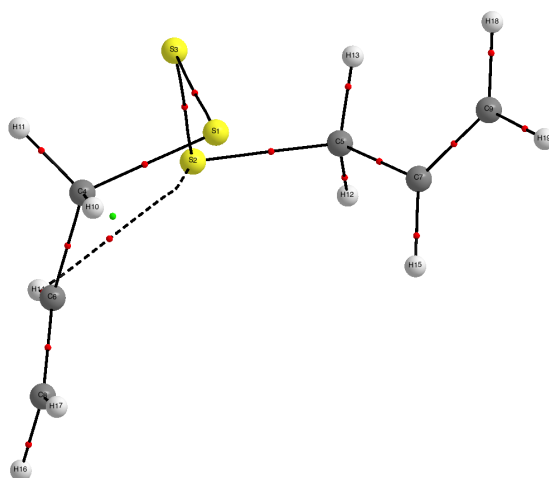

**Figure S46.** Diallyl trisulfide\_conformer\_11

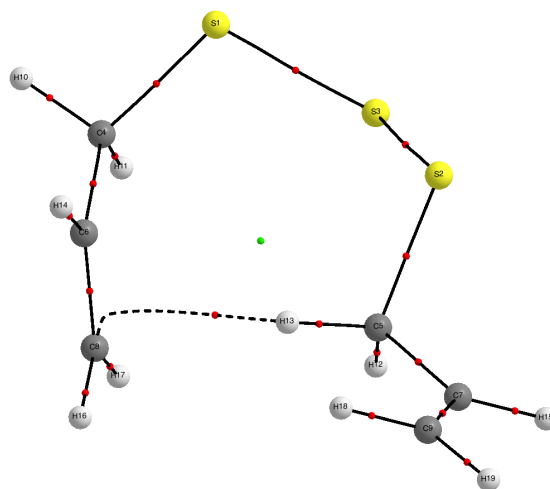

**Figure S47.** Diallyl trisulfide\_conformer\_12

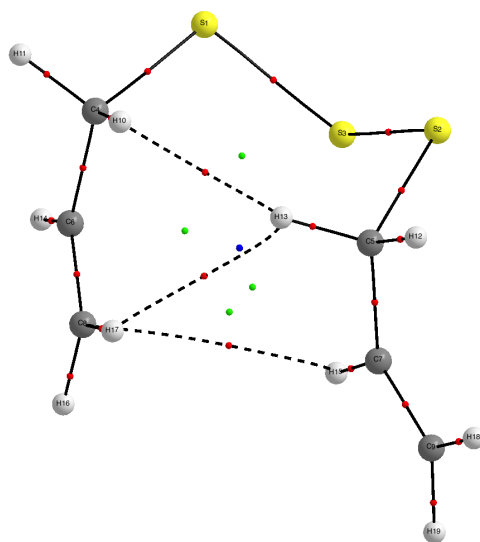

**Figure S48.** Diallyl trisulfide\_conformer\_13

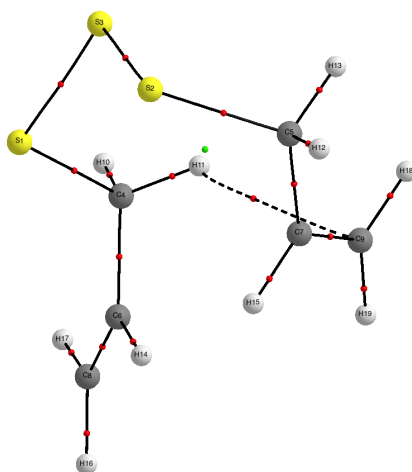

**Figure S49.** Diallyl trisulfide\_conformer\_14

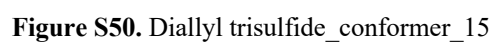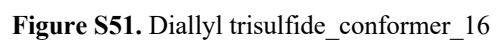



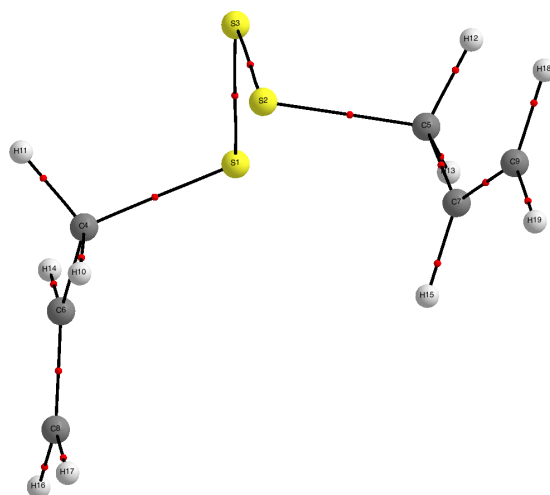

**Figure S52.** Diallyl trisulfide\_conformer\_17

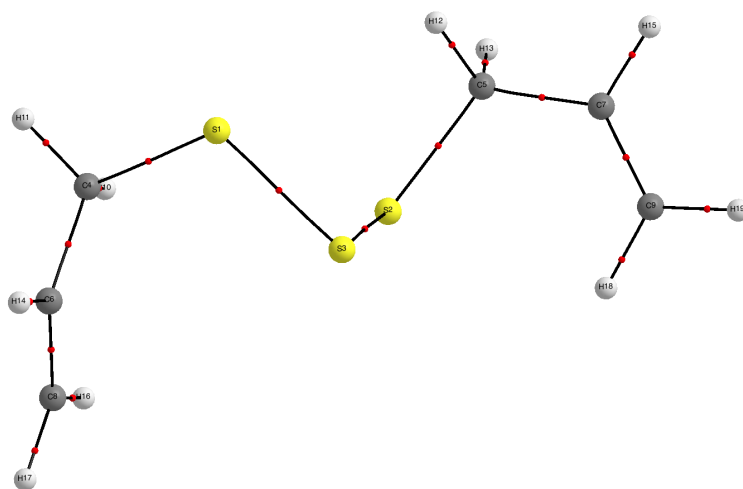

**Figure S53.** Diallyl trisulfide\_conformer\_18

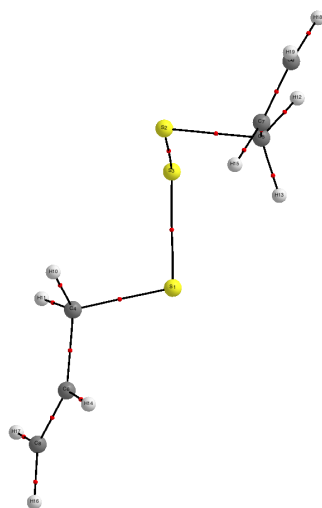

**Figure S54.** Diallyl trisulfide\_conformer\_19

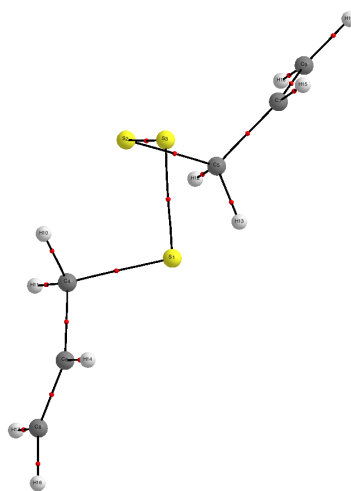

**Figure S55.** Diallyl trisulfide\_conformer\_20

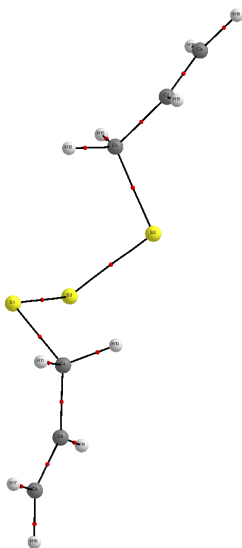

**Figure S56.** Diallyl trisulfide\_conformer\_21

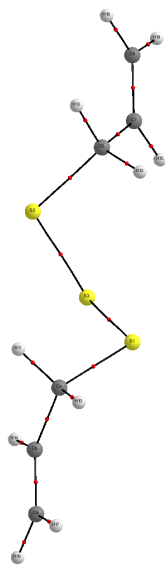

**Figure S57.** Diallyl trisulfide\_conformer\_22

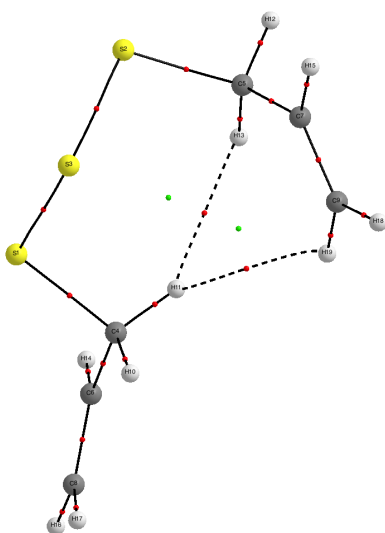

**Figure S58.** Diallyl trisulfide\_conformer\_23

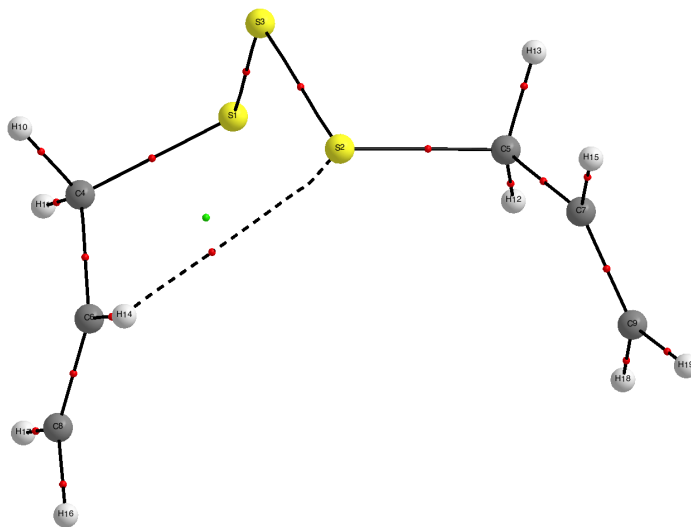

**Figure S59.** Diallyl trisulfide\_conformer\_24

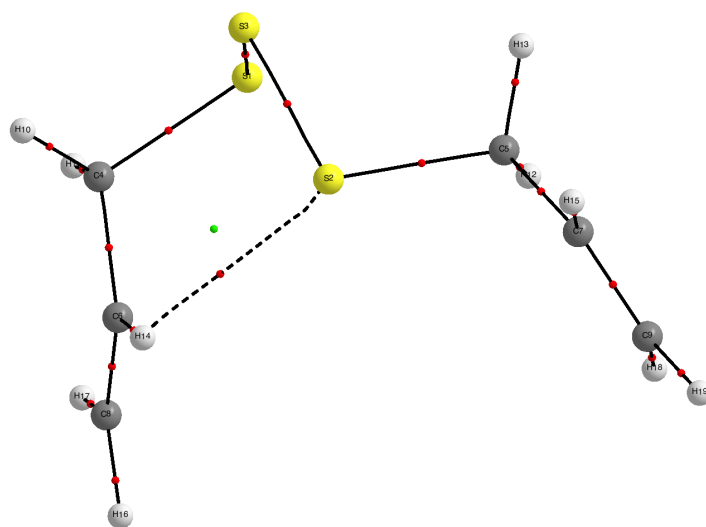

**Figure S60.** Diallyl trisulfide\_conformer\_25

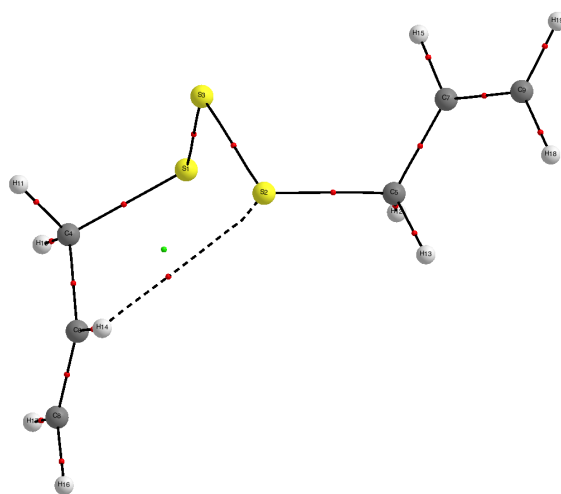

**Figure S61.** Diallyl trisulfide\_conformer\_26

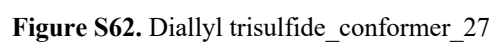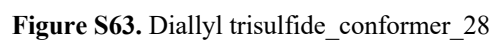

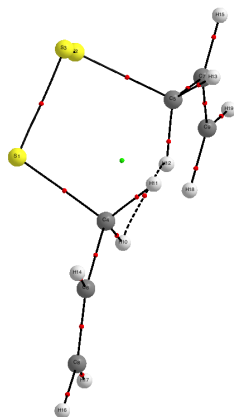

**Figure S64.** Diallyl trisulfide\_conformer\_29

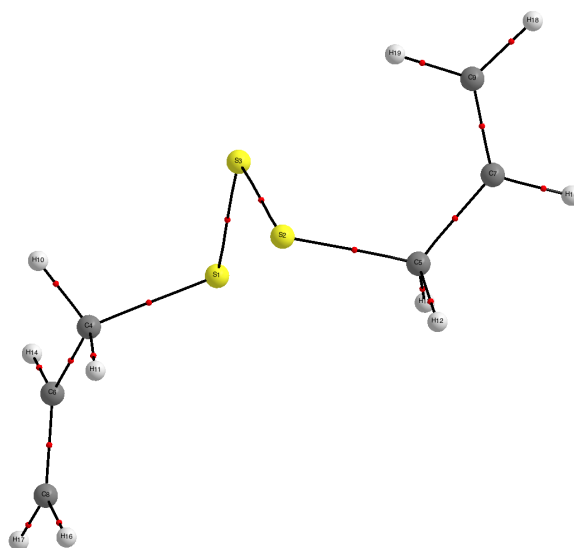

**Figure S65.** Diallyl trisulfide\_conformer\_30

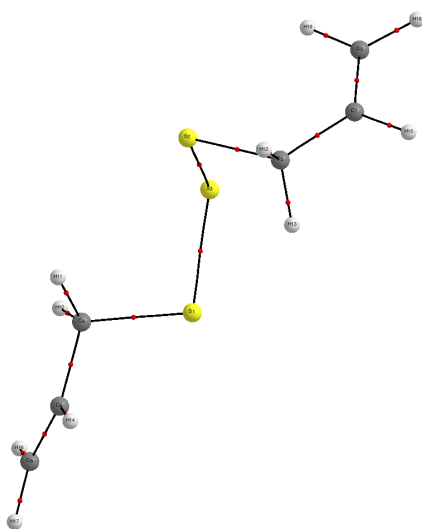

**Figure S66.** Diallyl trisulfide\_conformer\_31

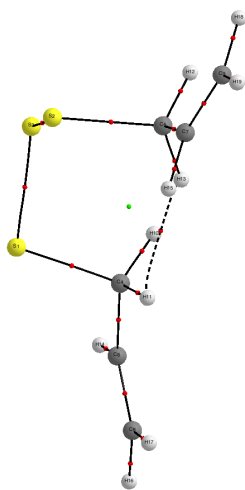

**Figure S67.** Diallyl trisulfide\_conformer\_32



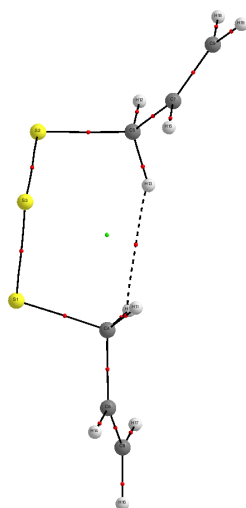

**Figure S68.** Diallyl trisulfide\_conformer\_33

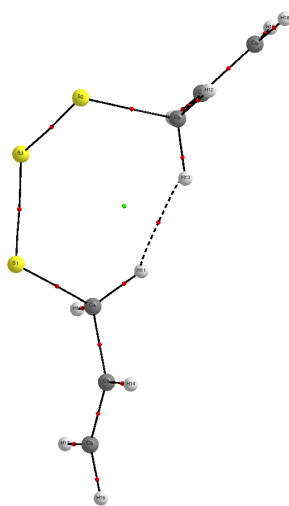

**Figure S69.** Diallyl trisulfide\_conformer\_34

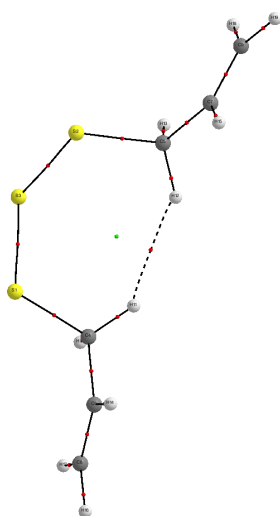

**Figure S70.** Diallyl trisulfide\_conformer\_35

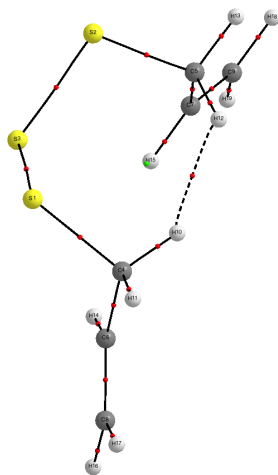

**Figure S71.** Diallyl trisulfide\_conformer\_36

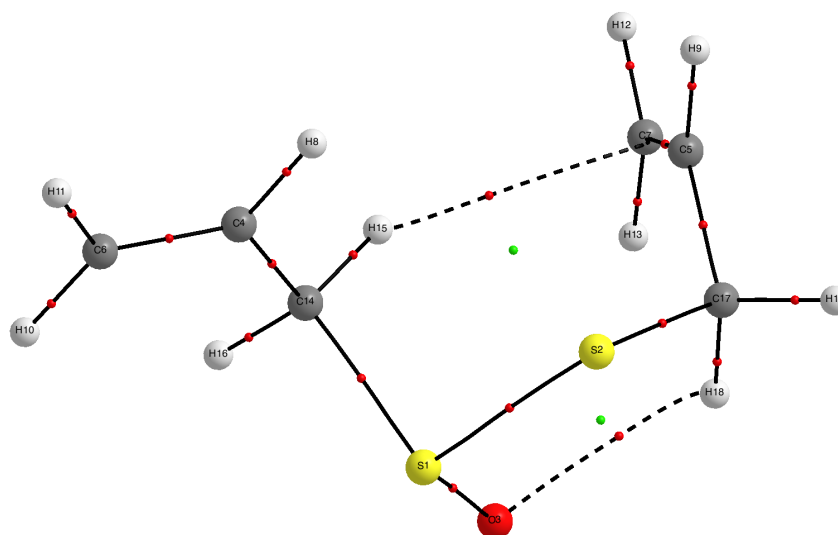

**Figure S72.** Allicin\_conformer\_1

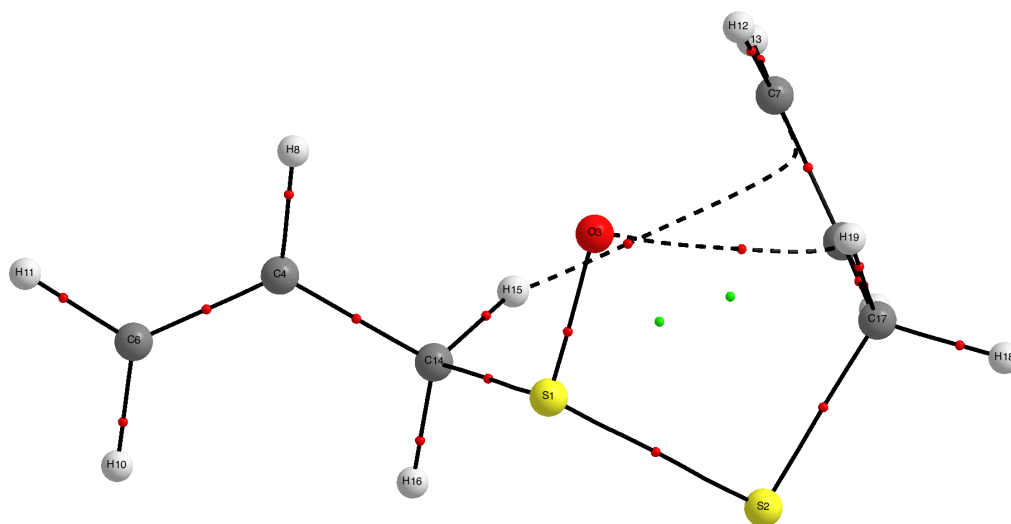

**Figure S73.** Allicin\_conformer\_2

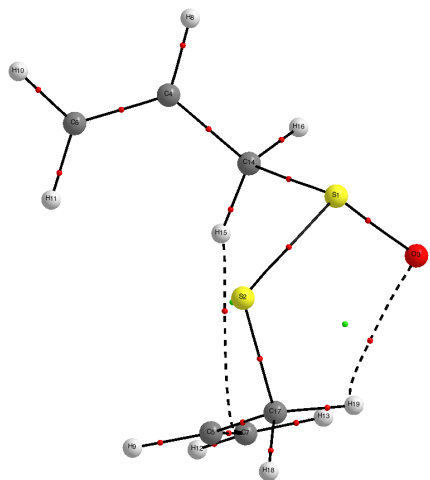

**Figure S74.** Allicin\_conformer\_3

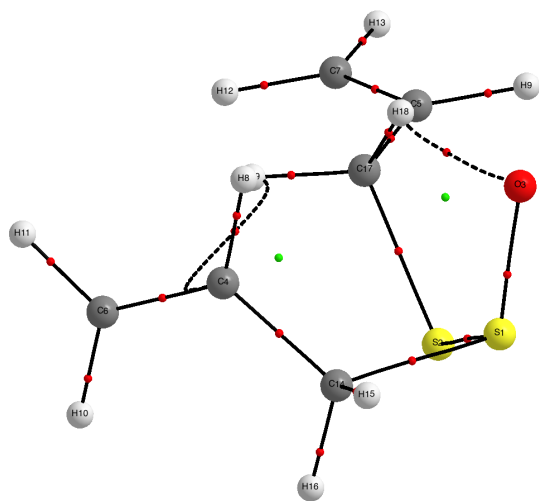

**Figure S75.** Allicin\_conformer\_4

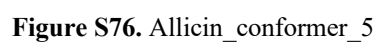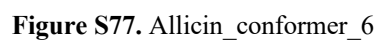

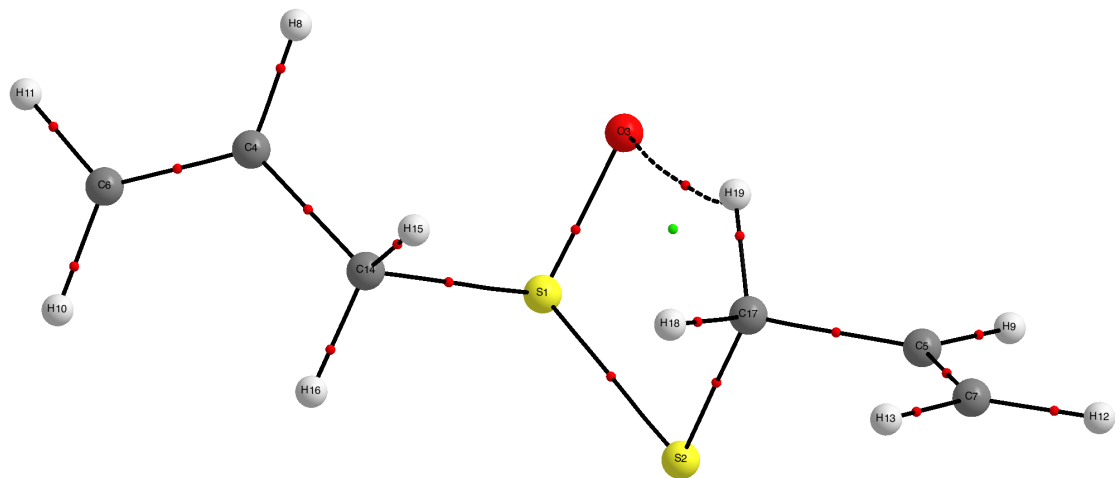

**Figure S78.** Allicin\_conformer\_7

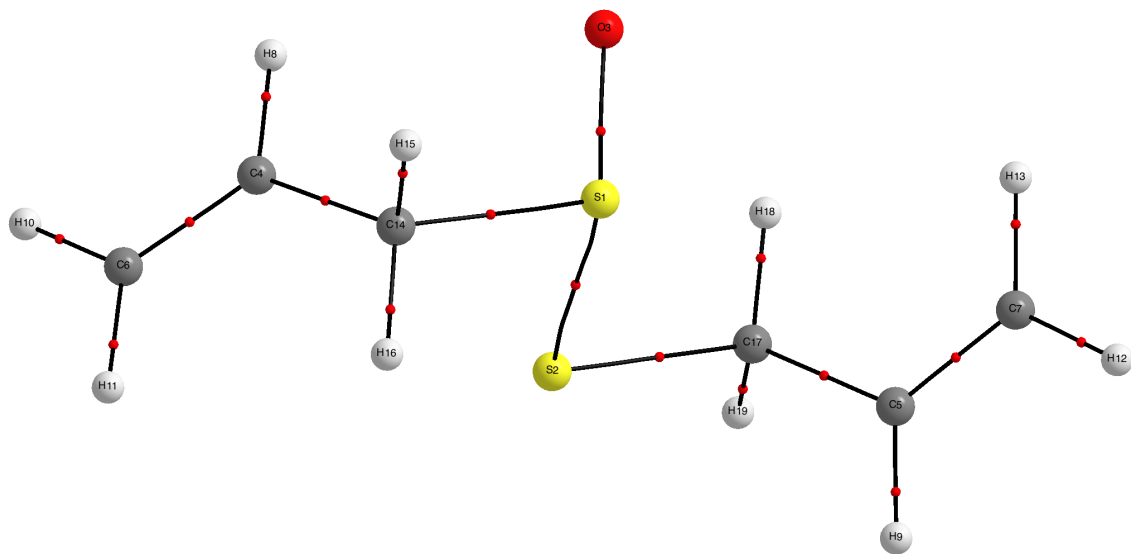

**Figure S79.** Allicin\_conformer\_8

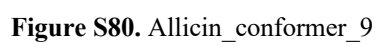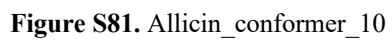

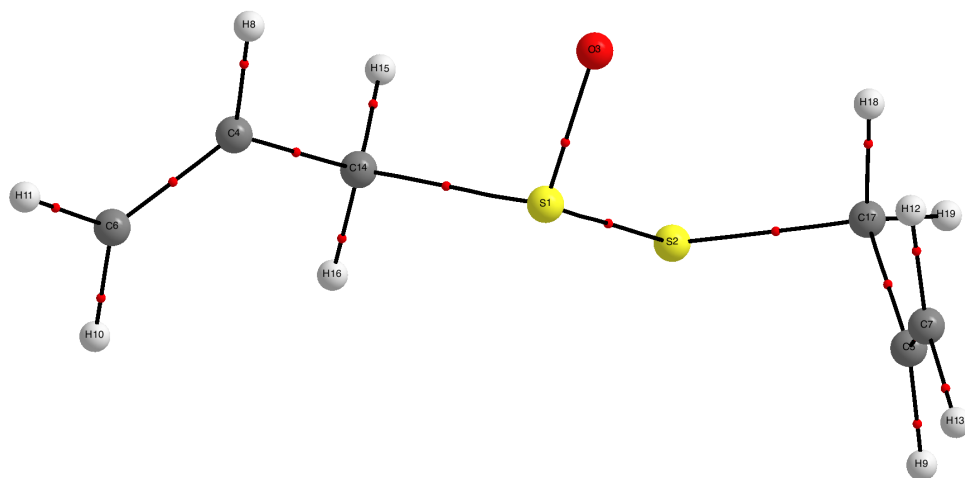

**Figure S82.** Allicin\_conformer\_11

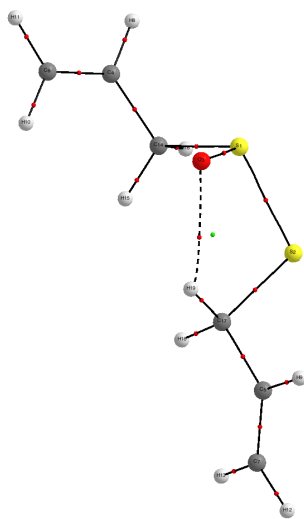

**Figure S83.** Allicin\_conformer\_12



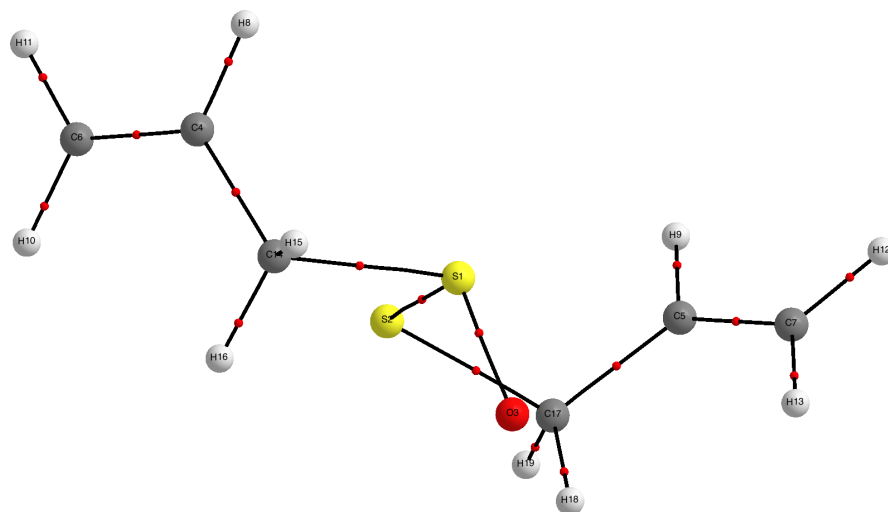

**Figure S84.** Allicin\_conformer\_13

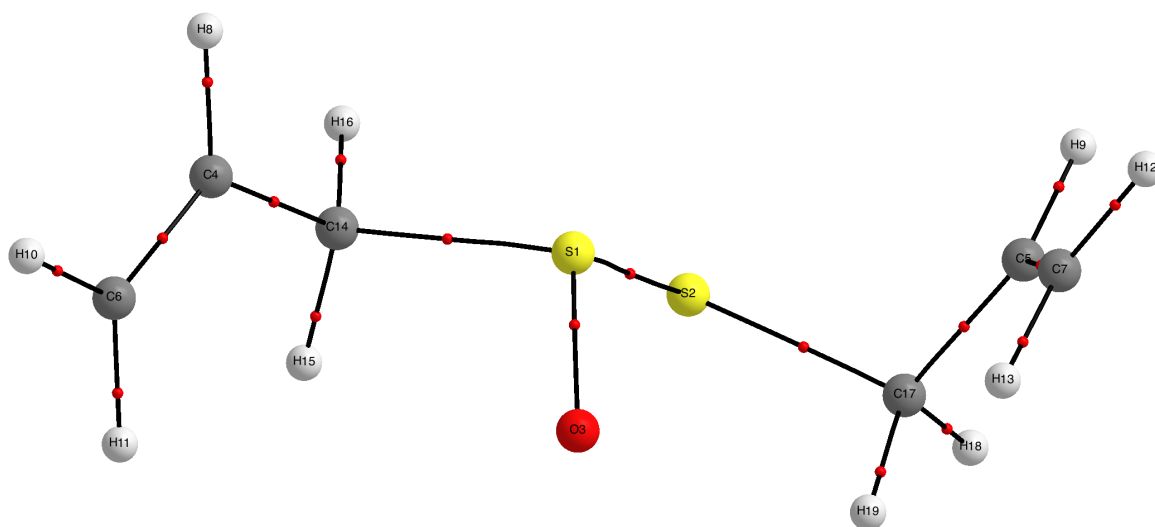

**Figure S85.** Allicin\_conformer\_14

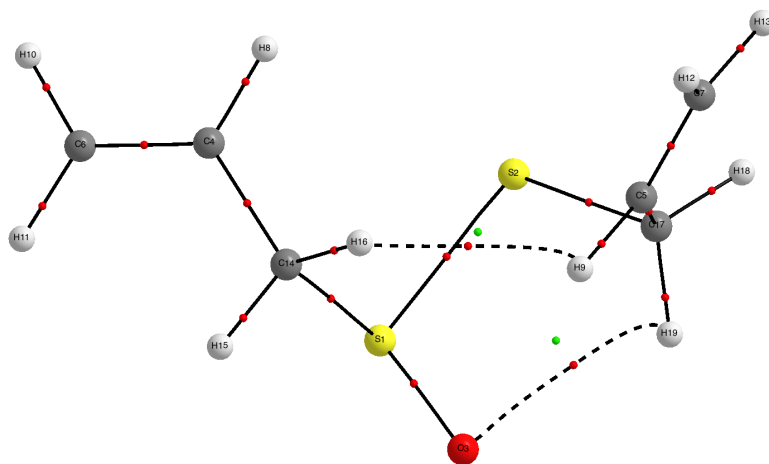

**Figure S86.** Allicin\_conformer\_15

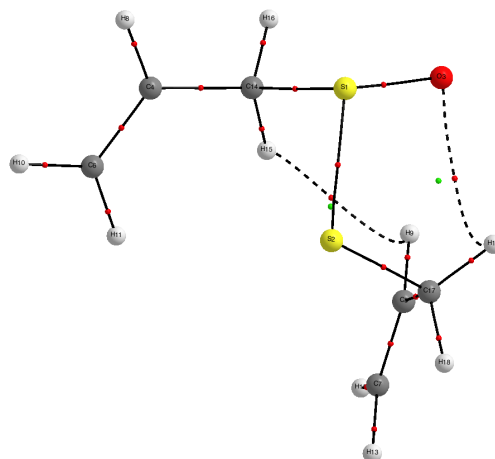

**Figure S87.** Allicin\_conformer\_16

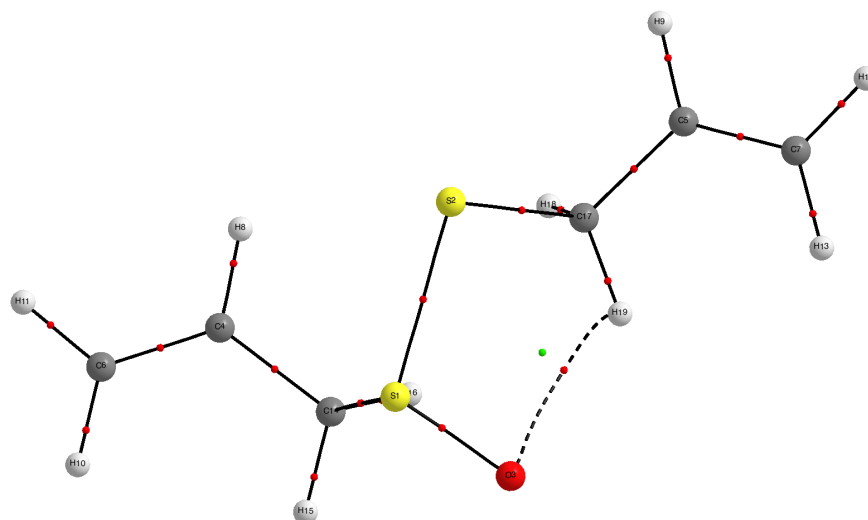

**Figure S88.** Allicin\_conformer\_17

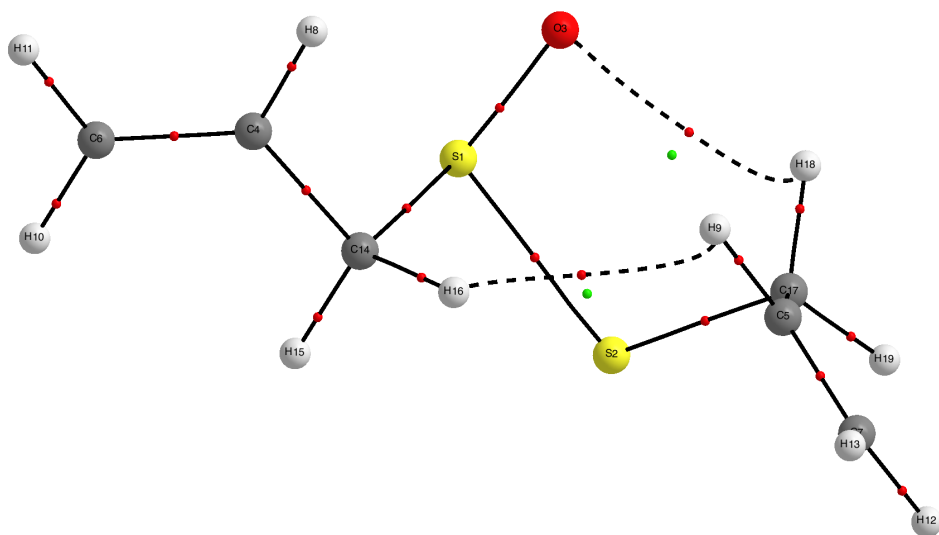

**Figure S89.** Allicin\_conformer\_18

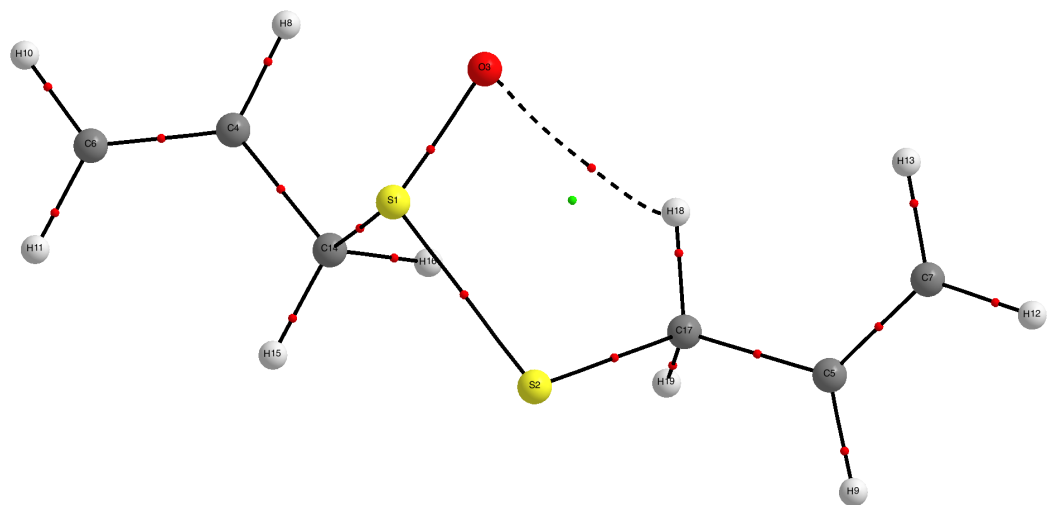

**Figure S90.** Allicin\_conformer\_19

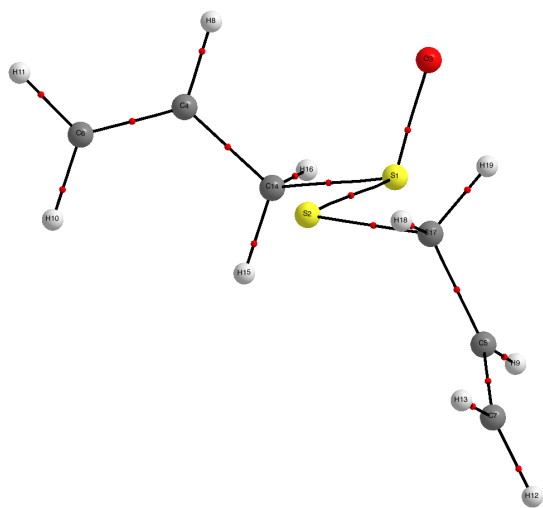

**Figure S91.** Allicin\_conformer\_20

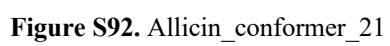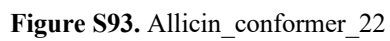

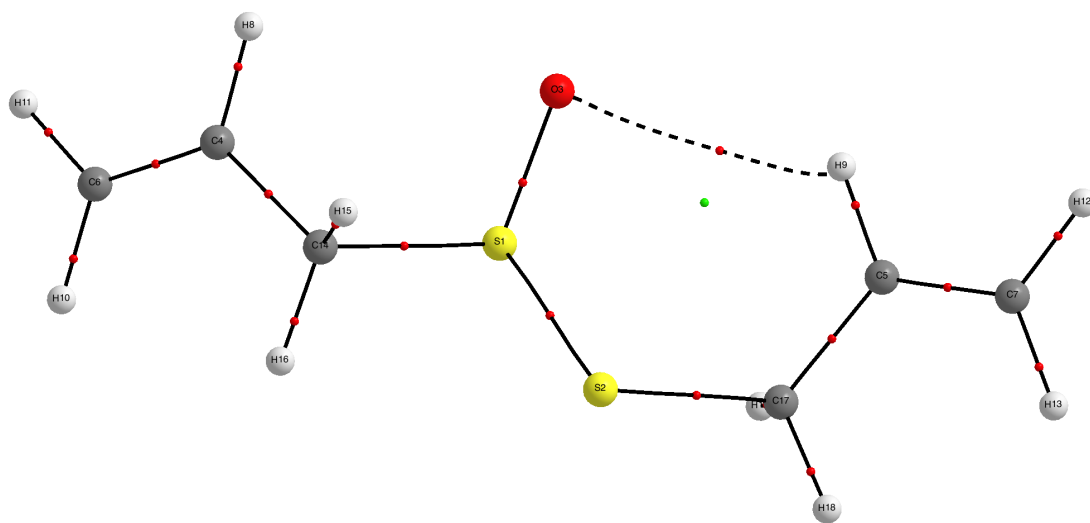

**Figure S94.** Allicin\_conformer\_23

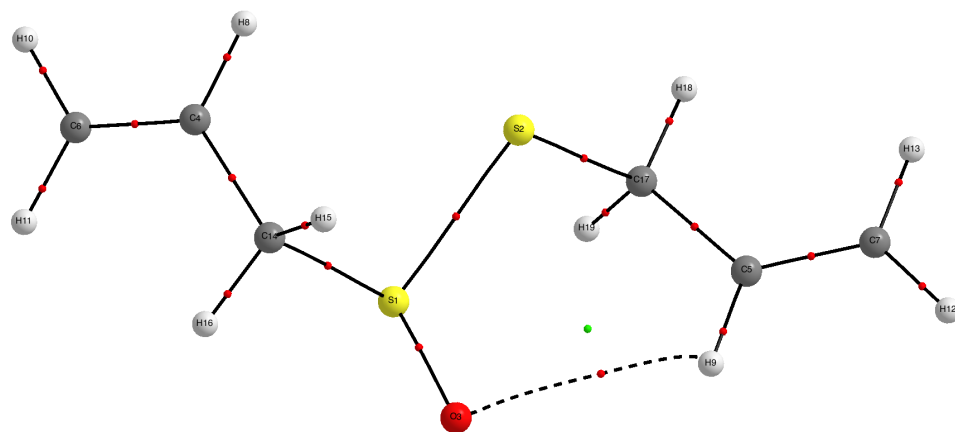

**Figure S95.** Allicin\_conformer\_24

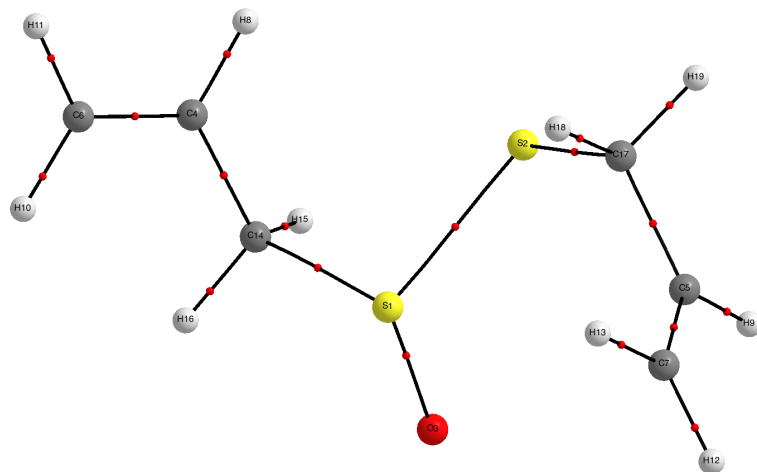

**Figure S96.** Allicin\_conformer\_25

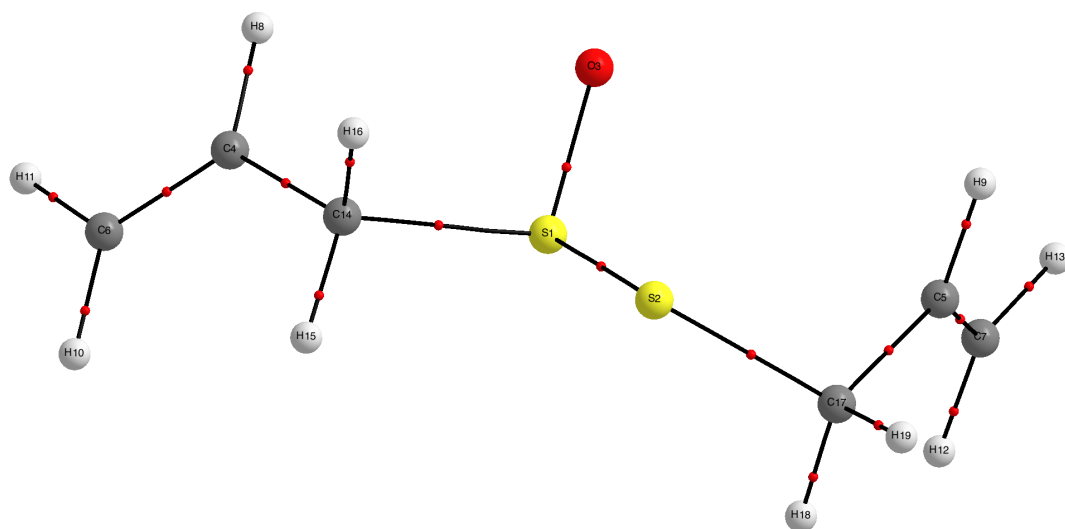

**Figure S97.** Allicin\_conformer\_26

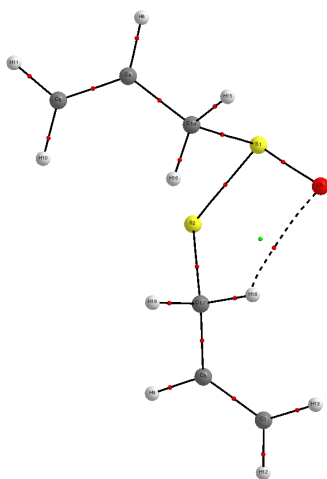

**Figure S98.** Allicin\_conformer\_27

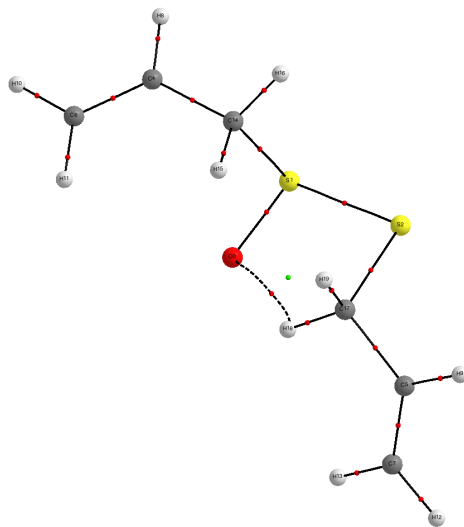

**Figure S99.** Allicin\_conformer\_28



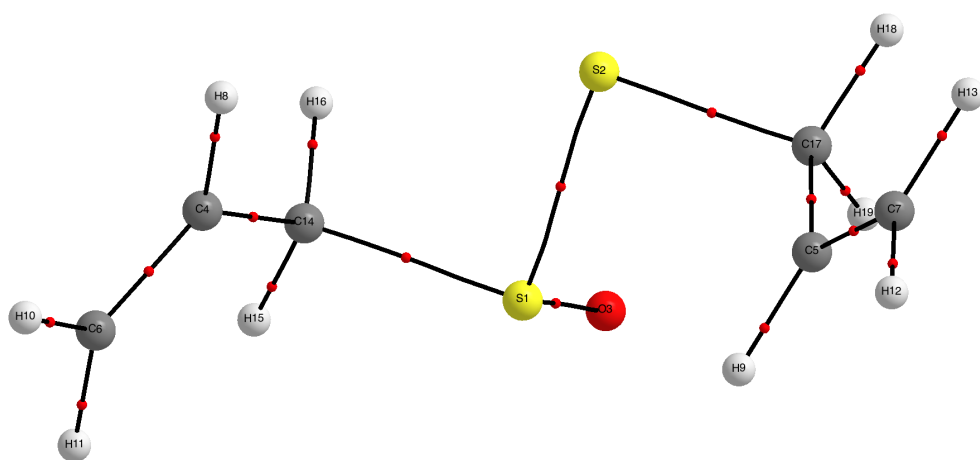

**Figure S100.** Allicin\_conformer\_29

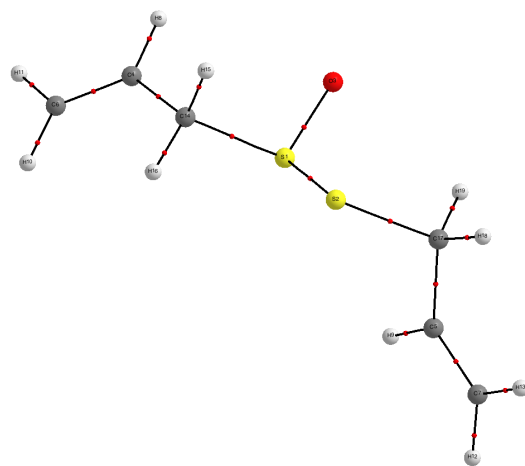

**Figure S101.** Allicin\_conformer\_30

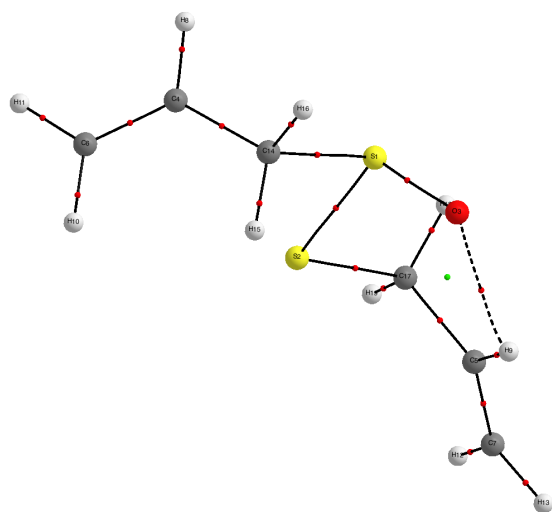

**Figure S102.** Allicin\_conformer\_31

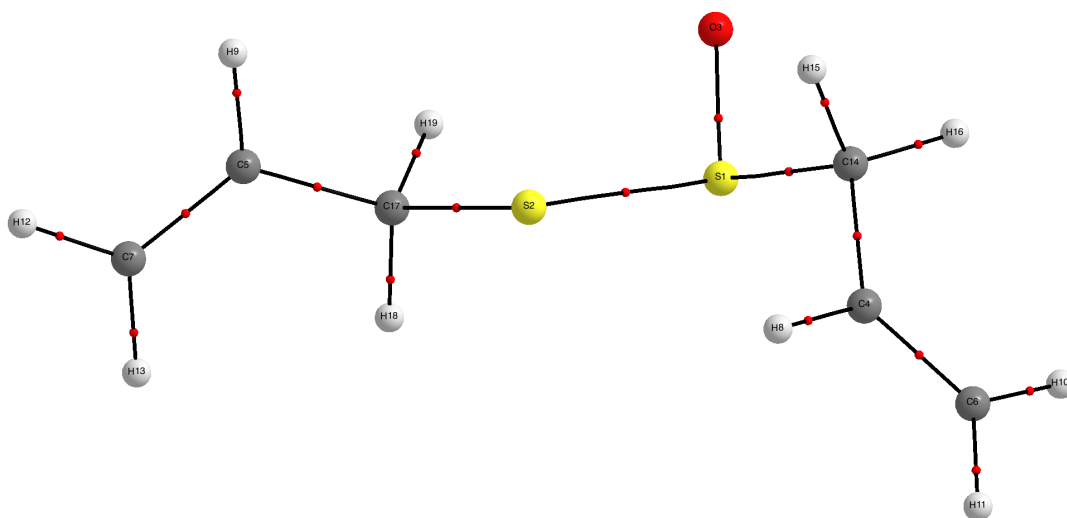

**Figure S103.** Allicin\_conformer\_32

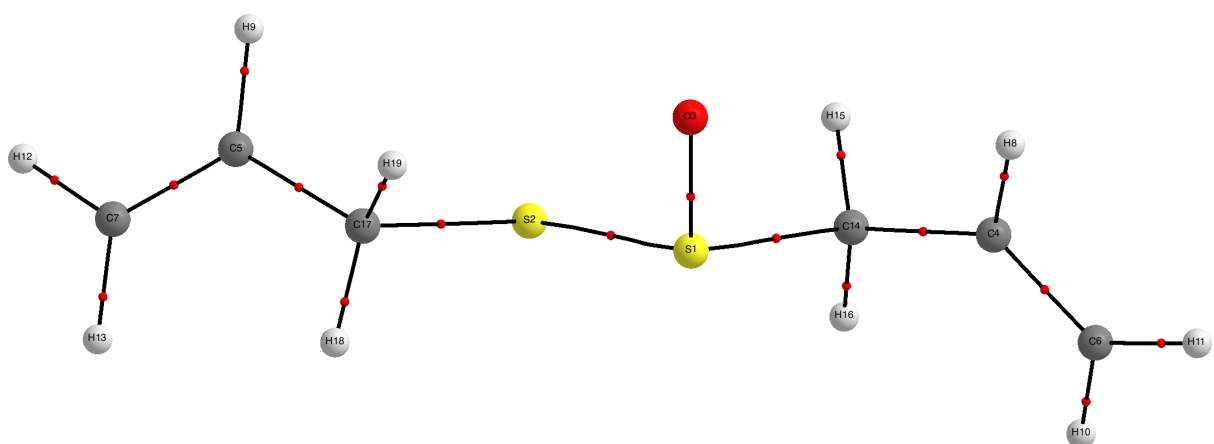

**Figure S104.** Allicin\_conformer\_33

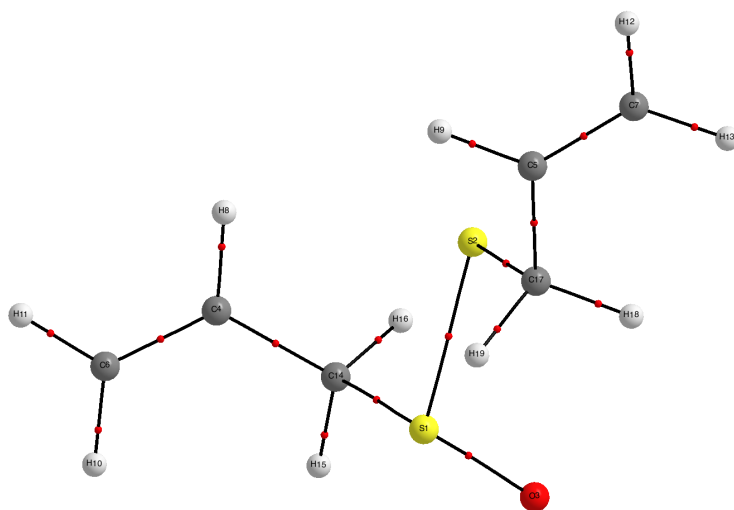

**Figure S105.** Allicin\_conformer\_34

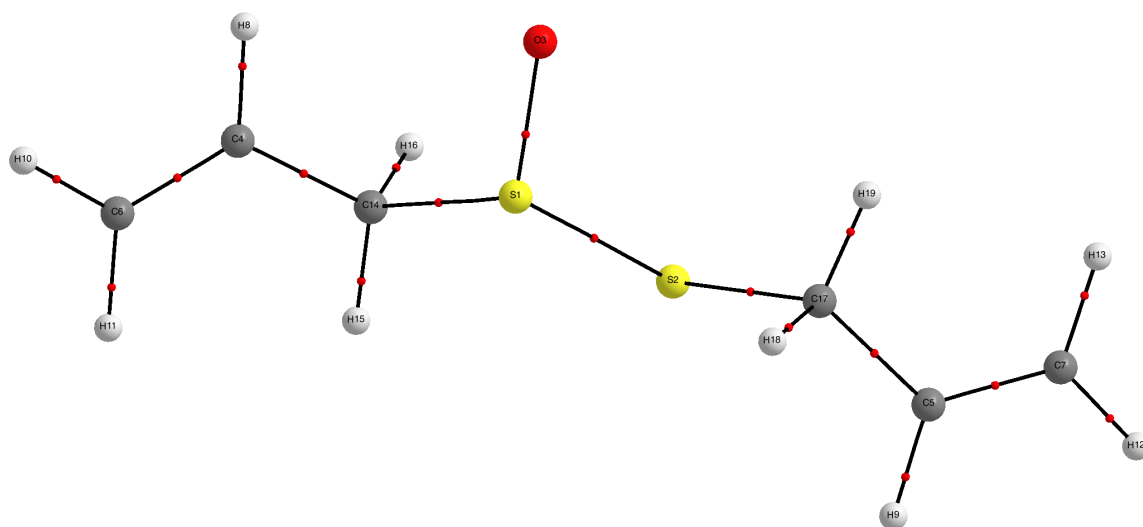

**Figure S106.** Allicin\_conformer\_35

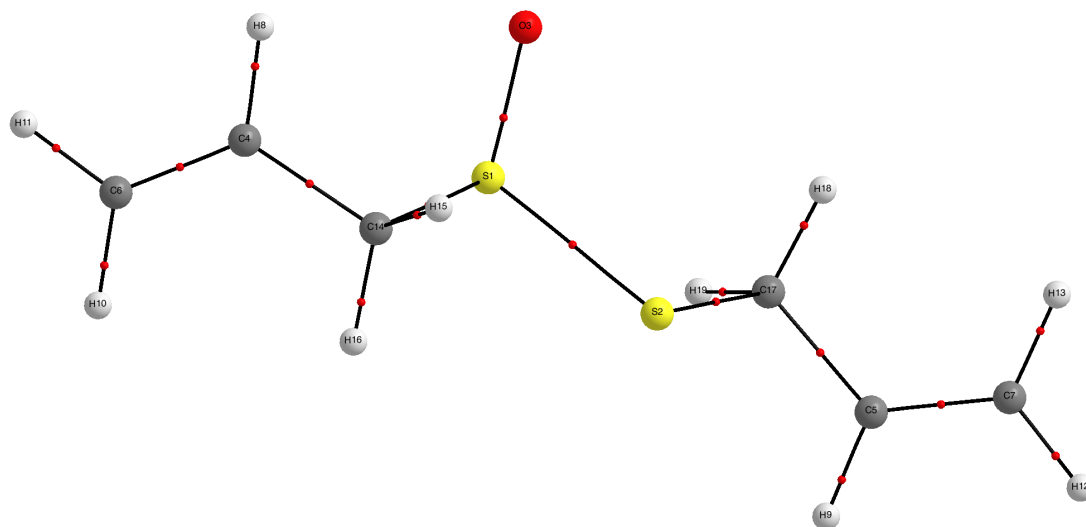

**Figure S107.** Allicin\_conformer\_36

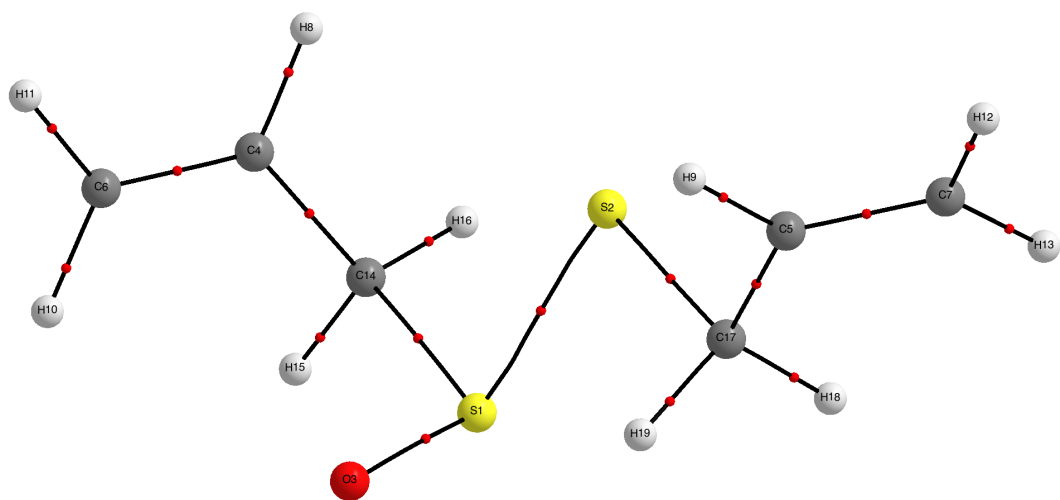

**Figure S108.** Allicin\_conformer\_37

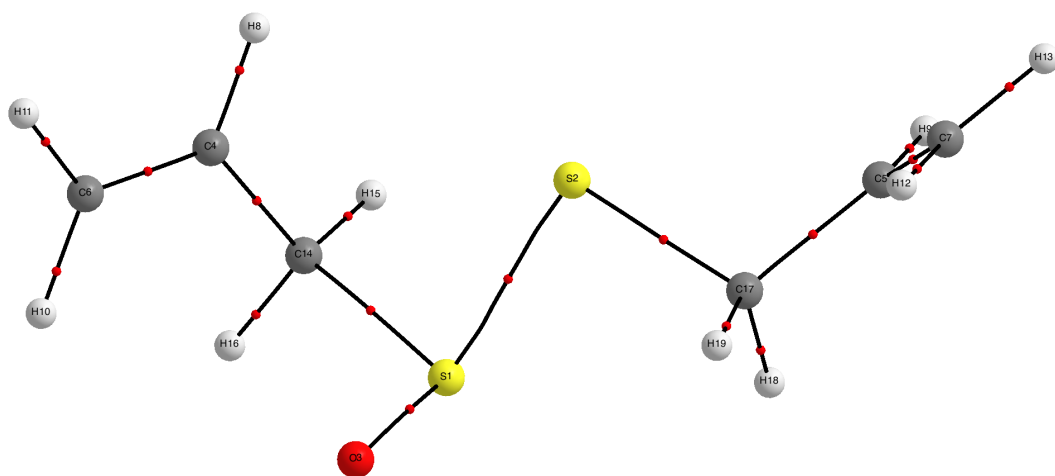

**Figure S109.** Allicin\_conformer\_38

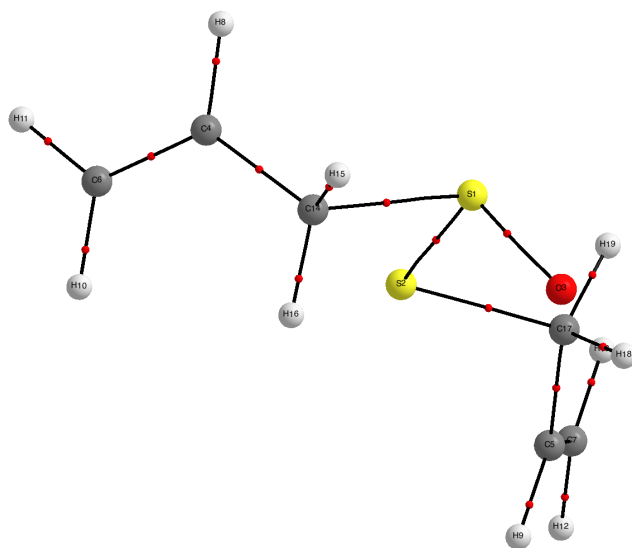

**Figure S110.** Allicin\_conformer\_39

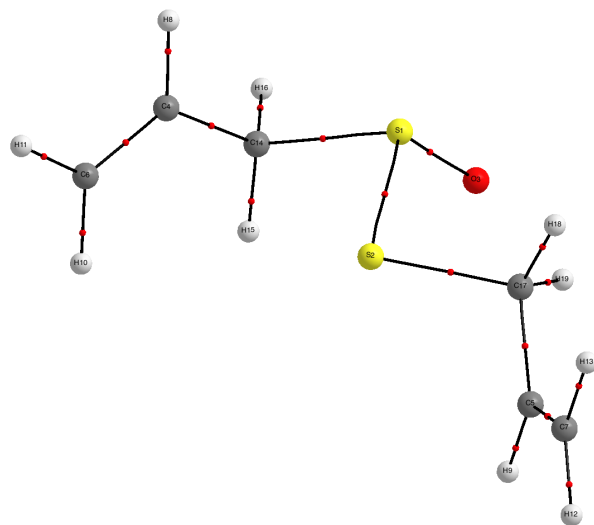

**Figure S111.** Allicin\_conformer\_40

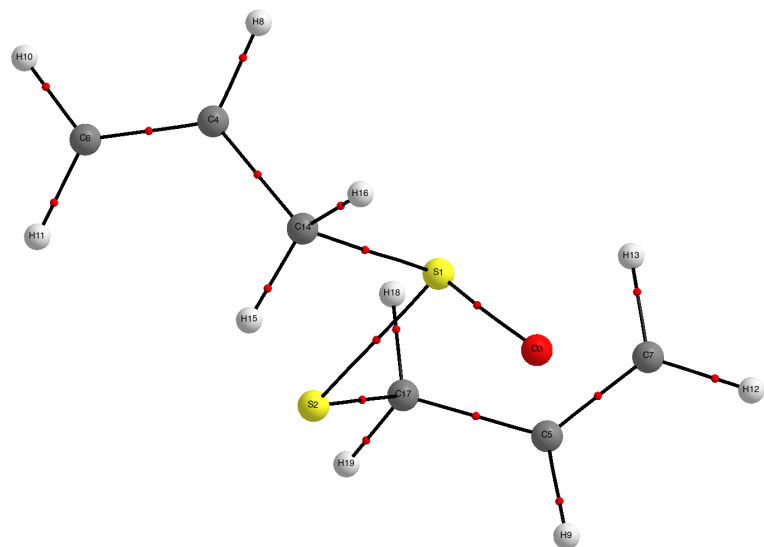

**Figure S112.** Allicin\_conformer\_41

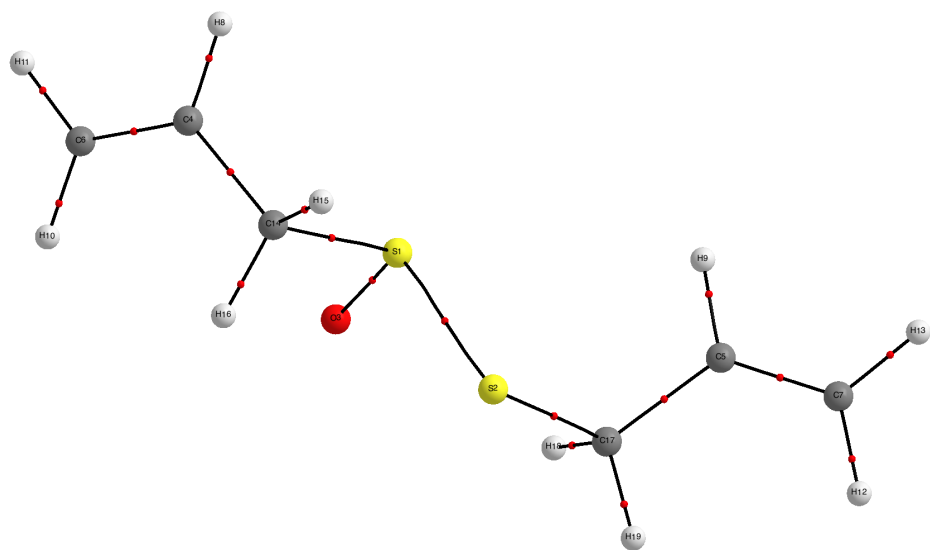

**Figure S113.** Allicin\_conformer\_42

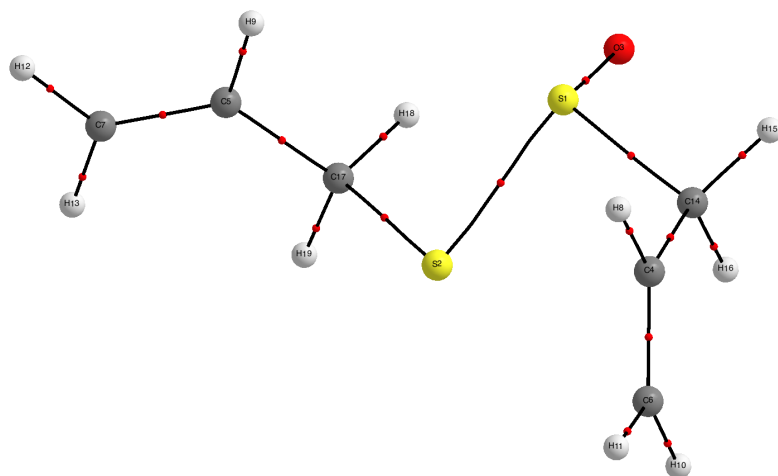

**Figure S114.** Allicin\_conformer\_43

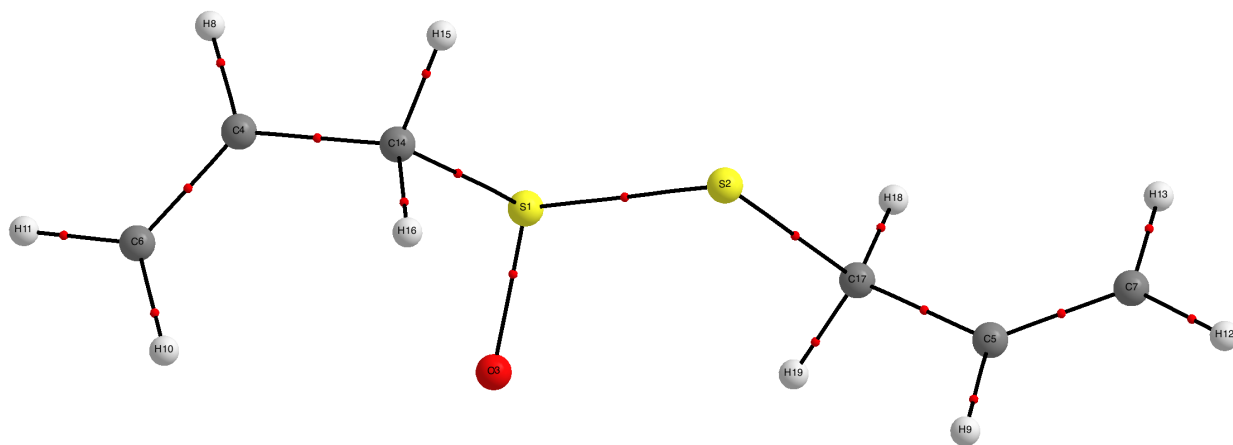

**Figure S115.** Allicin\_conformer\_44



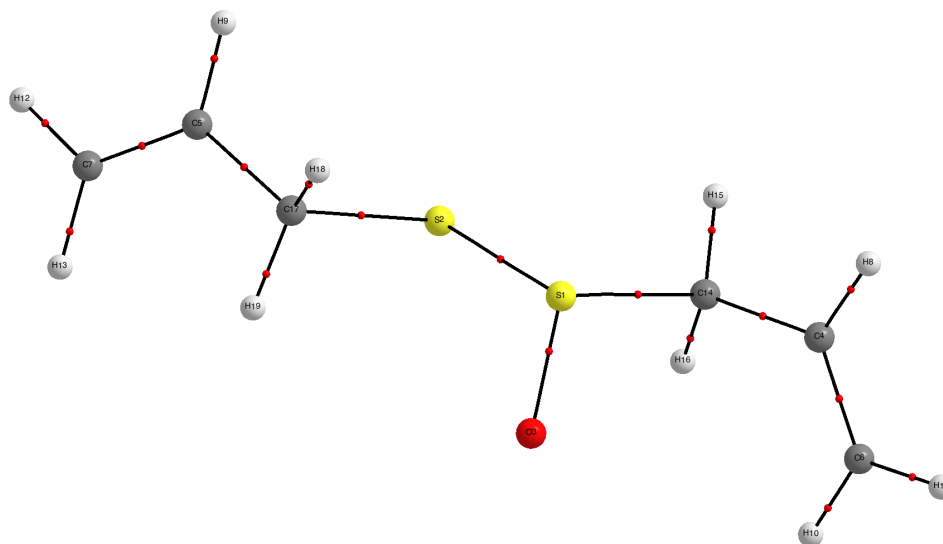

**Figure S116.** Allicin\_conformer\_45

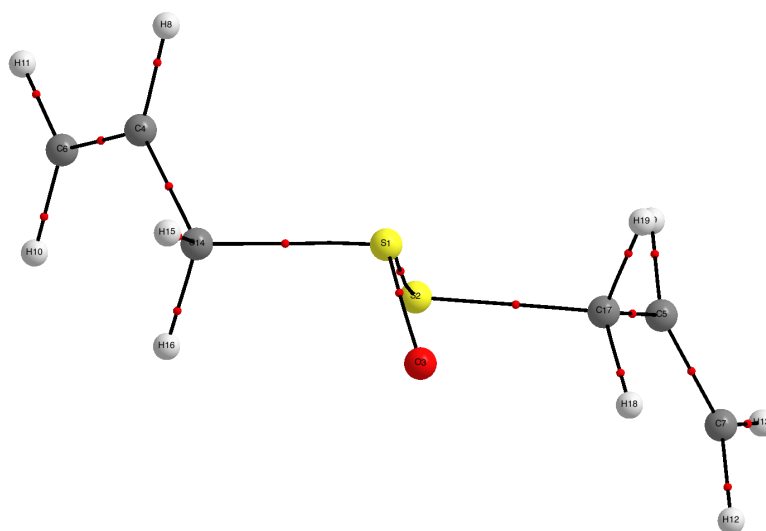

**Figure S117.** Allicin\_conformer\_46

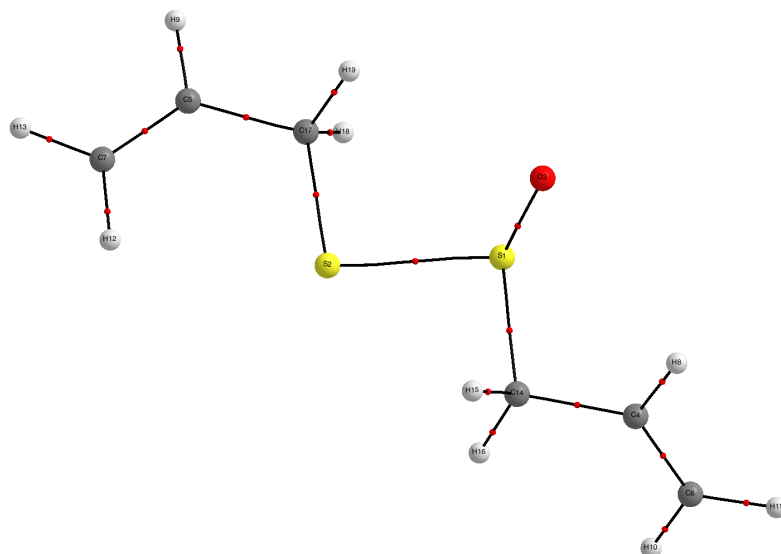

**Figure S118.** Allicin\_conformer\_47

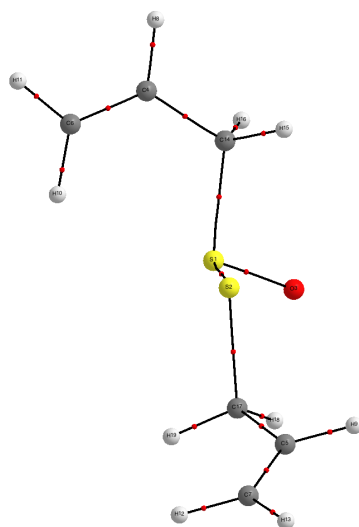

**Figure S119.** Allicin\_conformer\_48

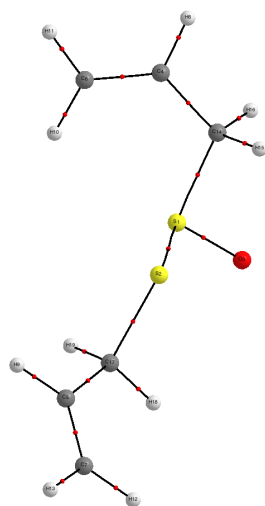

**Figure S120.** Allicin\_conformer\_49

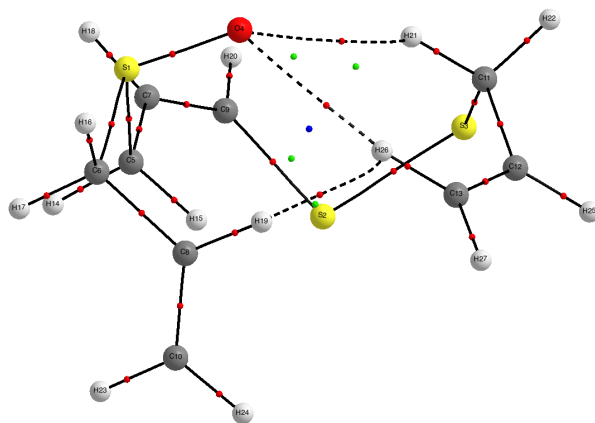

**Figure S121.** Ajoene\_(Z)\_conformer\_1

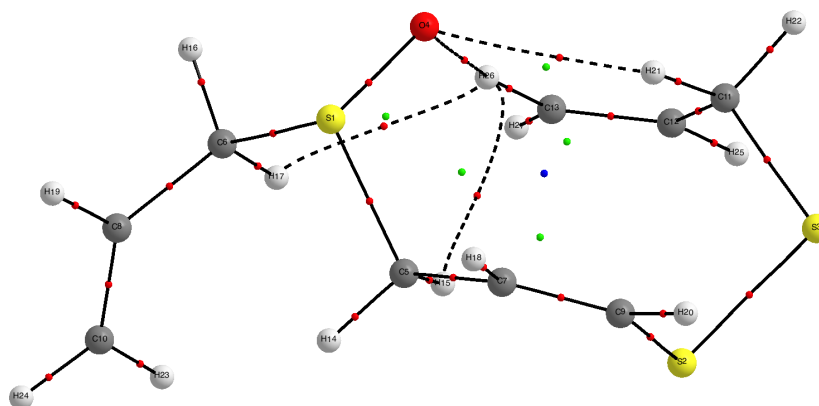

**Figure S122.** Ajoene\_(Z)\_conformer\_2

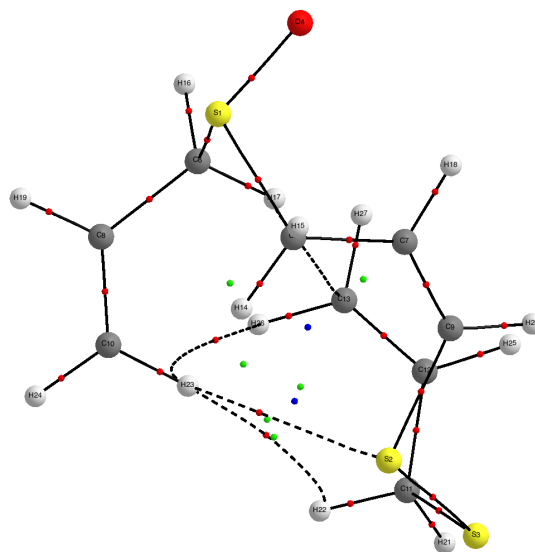

**Figure S123.** Ajoene\_(Z)\_conformer\_3



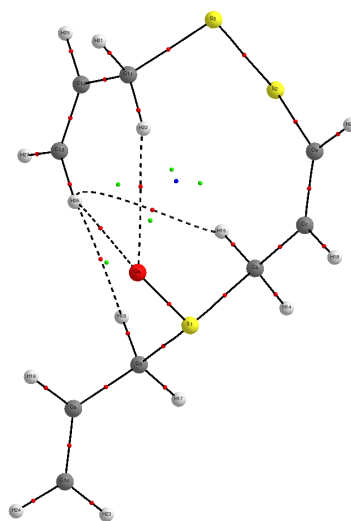

**Figure S126.** Ajoene\_(Z)\_conformer\_6

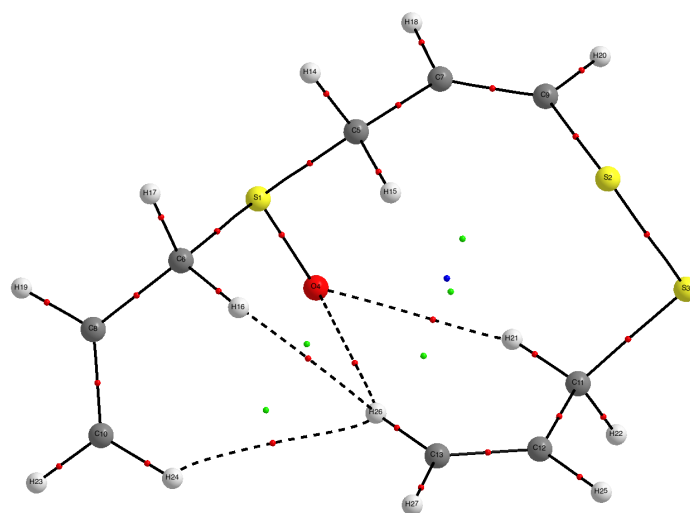

**Figure S127.** Ajoene\_(Z)\_conformer\_7

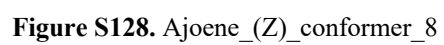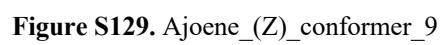

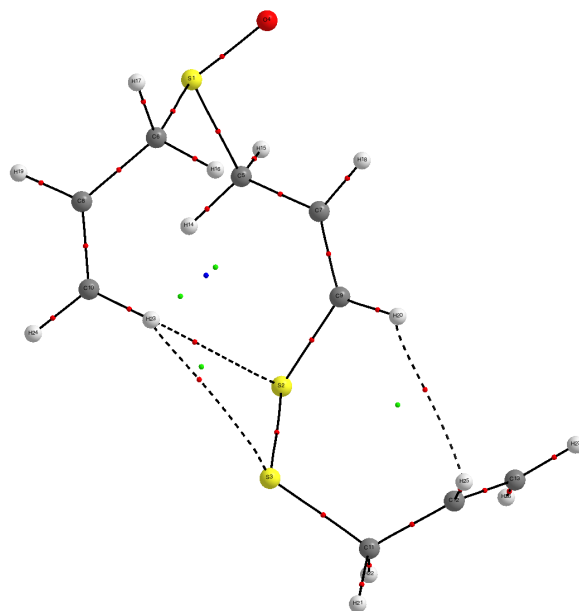

**Figure S130.** Ajoene\_(Z)\_conformer\_10

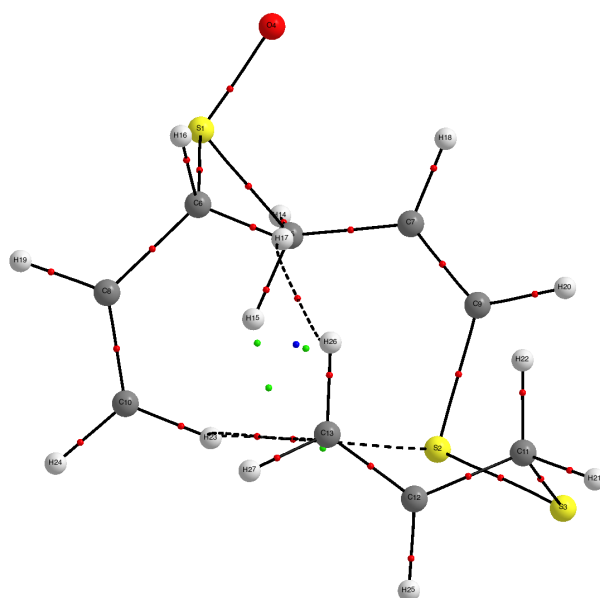

**Figure S131.** Ajoene\_(Z)\_conformer\_11



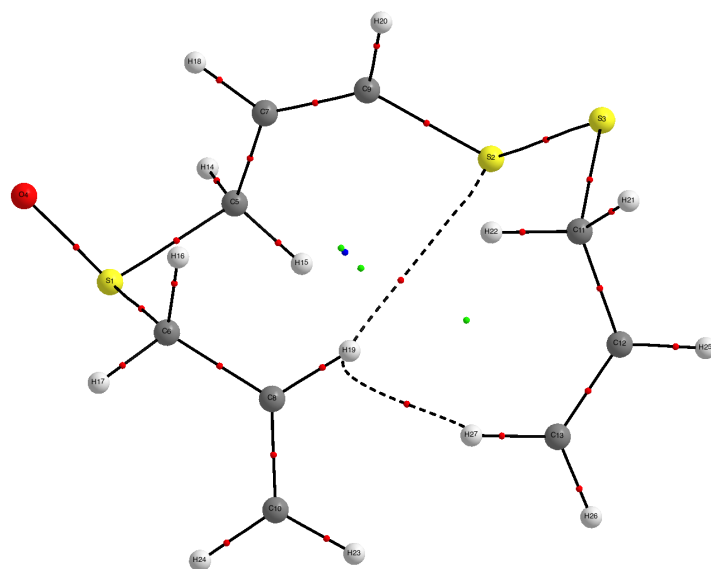

**Figure S132.** Ajoene\_(Z)\_conformer\_12

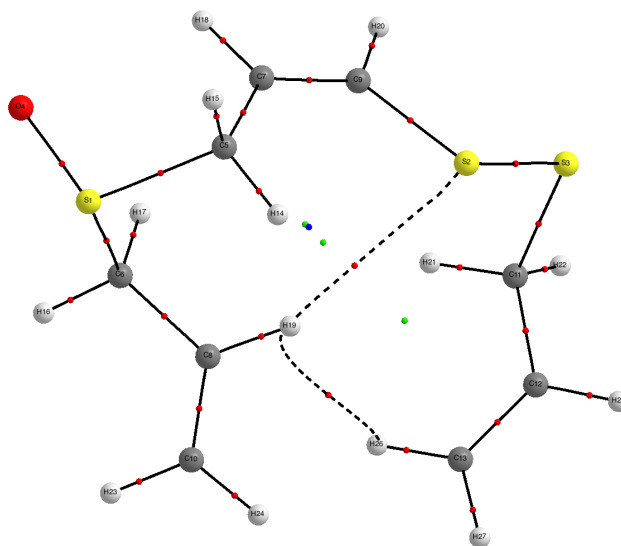

**Figure S133.** Ajoene\_(Z)\_conformer\_13

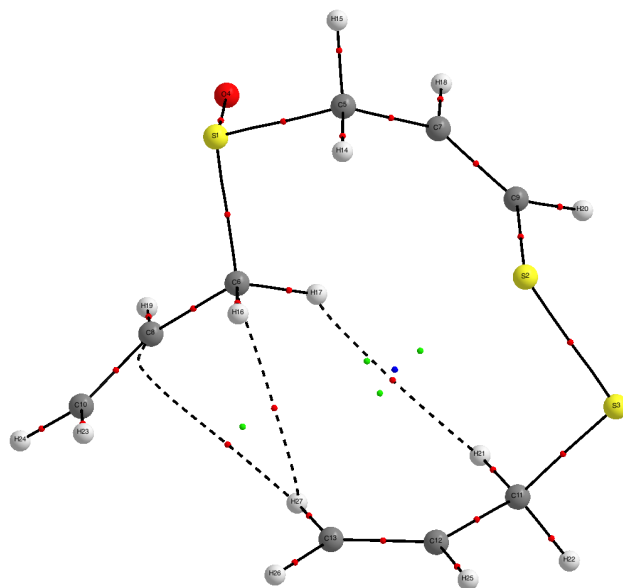

**Figure S134.** Ajoene\_(Z)\_conformer\_14

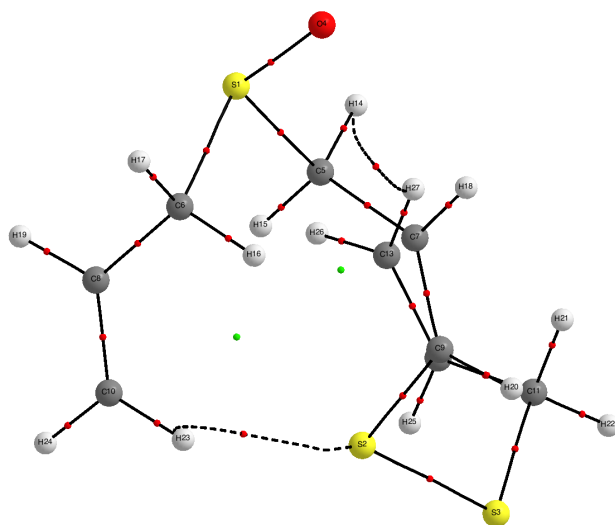

**Figure S135.** Ajoene\_(Z)\_conformer\_15

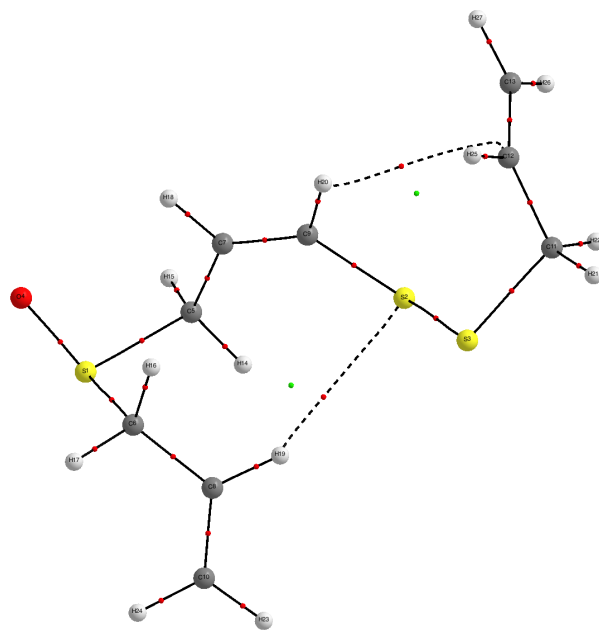

**Figure S136.** Ajoene\_(Z)\_conformer\_16

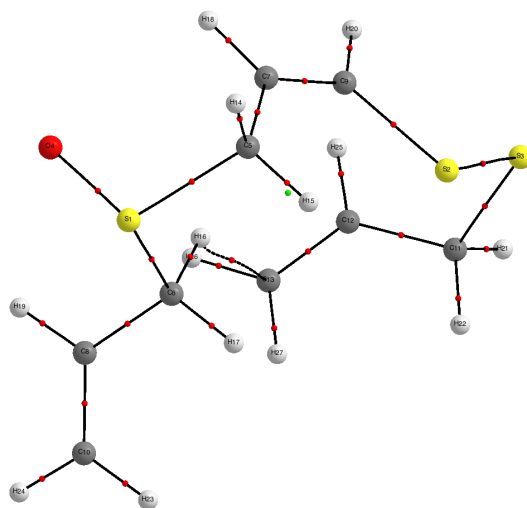

**Figure S137.** Ajoene\_(Z)\_conformer\_17

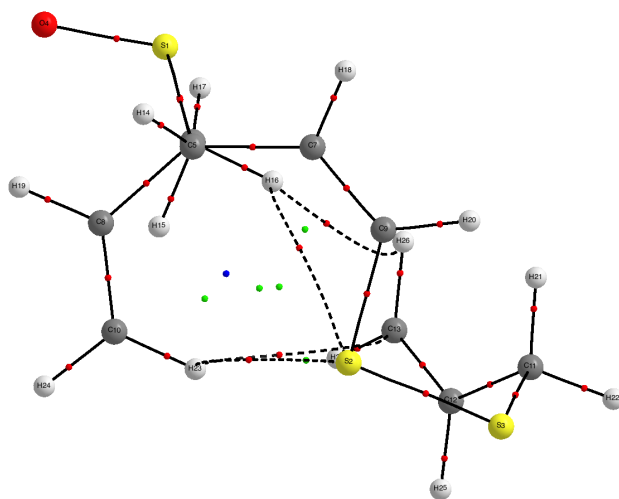

**Figure S138.** Ajoene\_(Z)\_conformer\_18

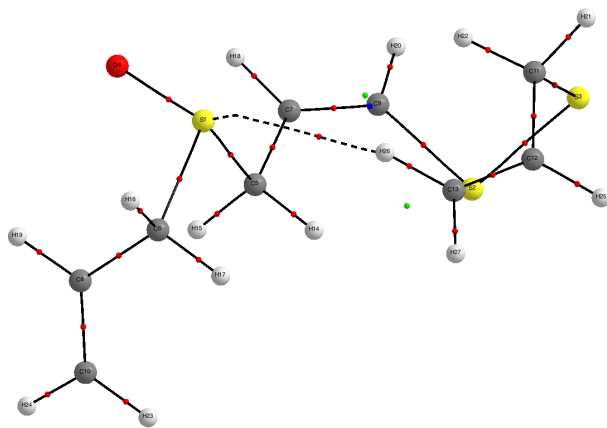

**Figure S139.** Ajoene\_(Z)\_conformer\_19

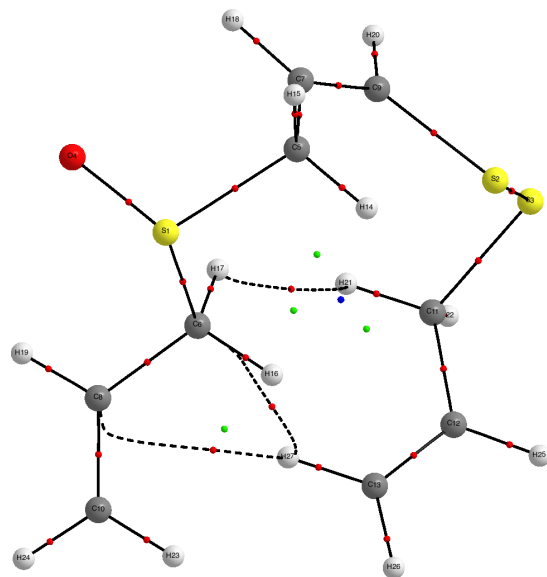

**Figure S140.** Ajoene\_(Z)\_conformer\_20

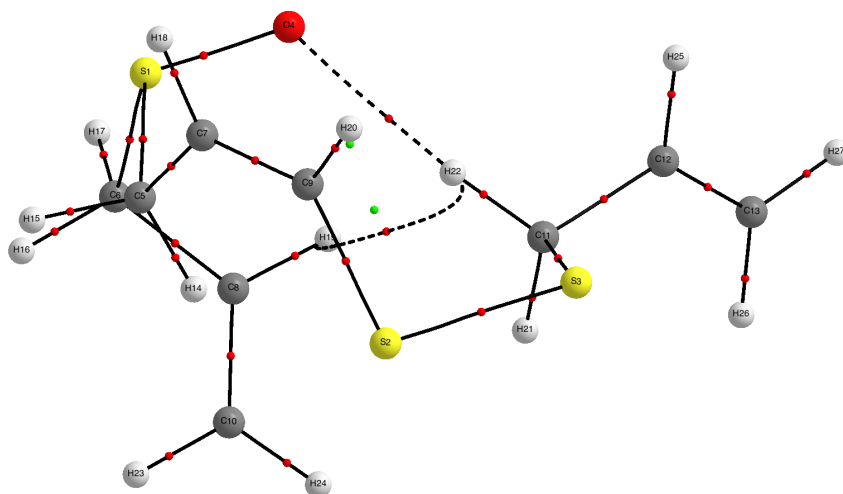

**Figure S141.** Ajoene\_(Z)\_conformer\_21

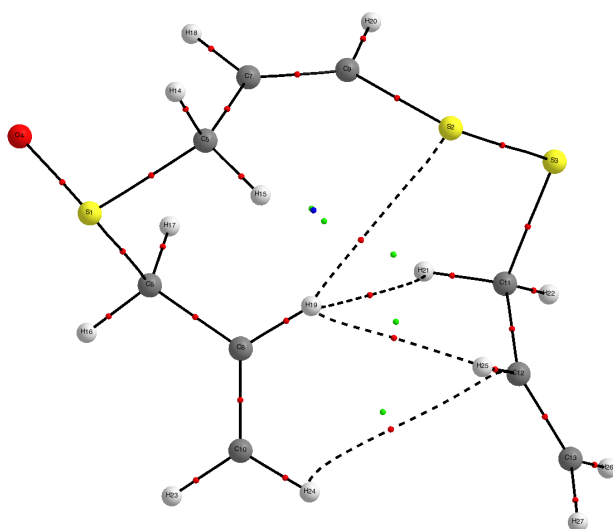

**Figure S142.** Ajoene\_(Z)\_conformer\_22

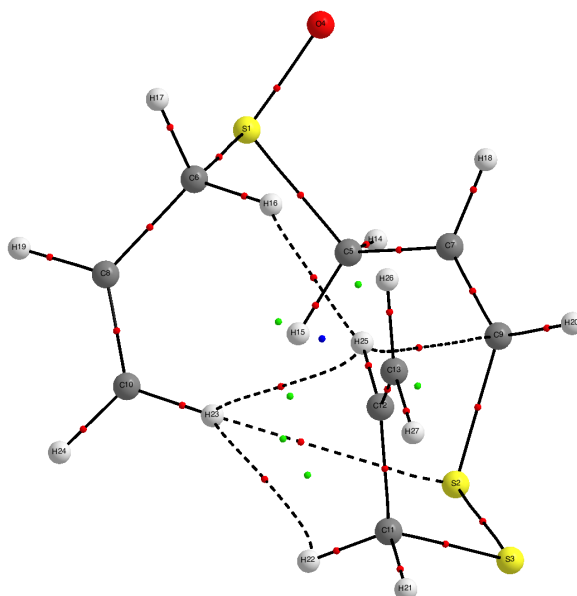

**Figure S143.** Ajoene\_(Z)\_conformer\_23

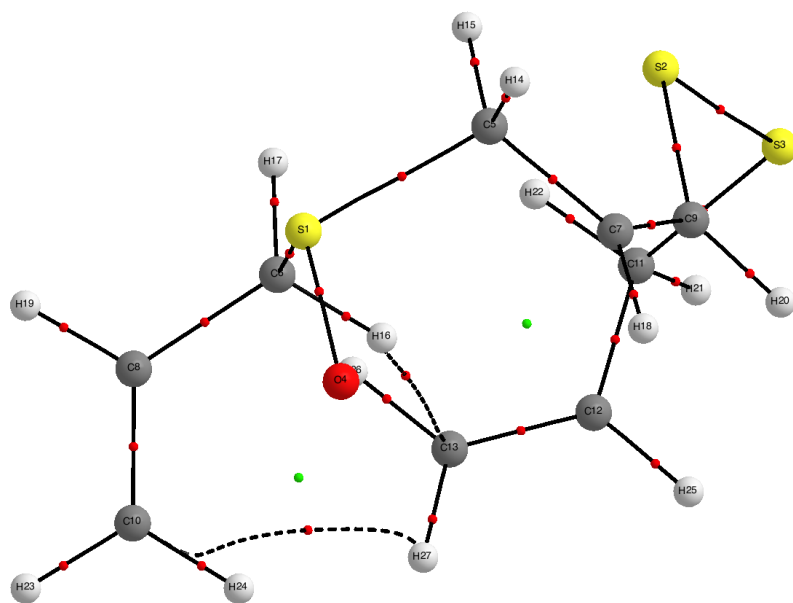

**Figure S144.** Ajoene\_(Z)\_conformer\_24

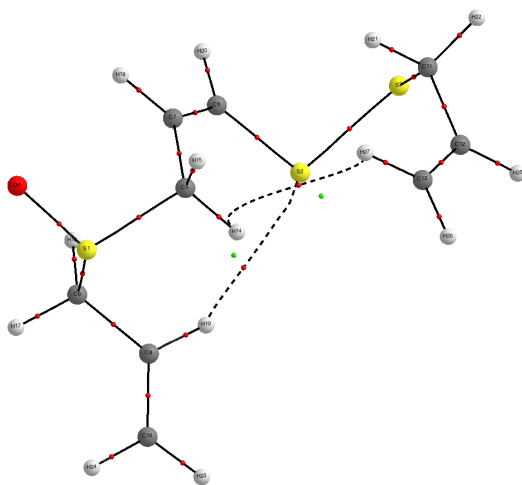

**Figure S145.** Ajoene\_(Z)\_conformer\_25

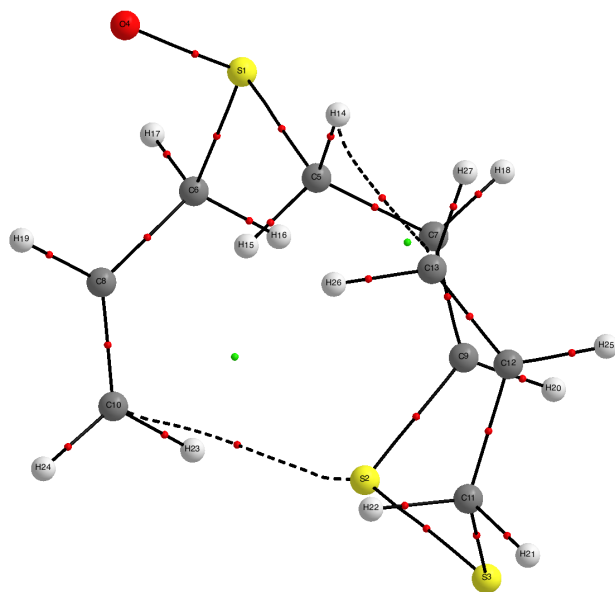

**Figure S146.** Ajoene\_(Z)\_conformer\_26

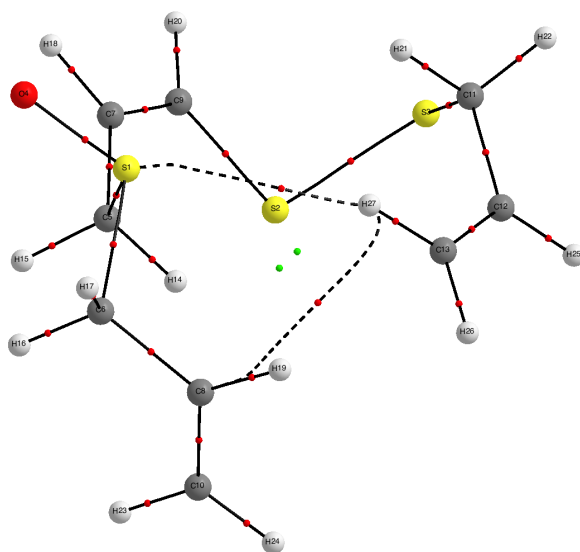

**Figure S147.** Ajoene\_(Z)\_conformer\_27



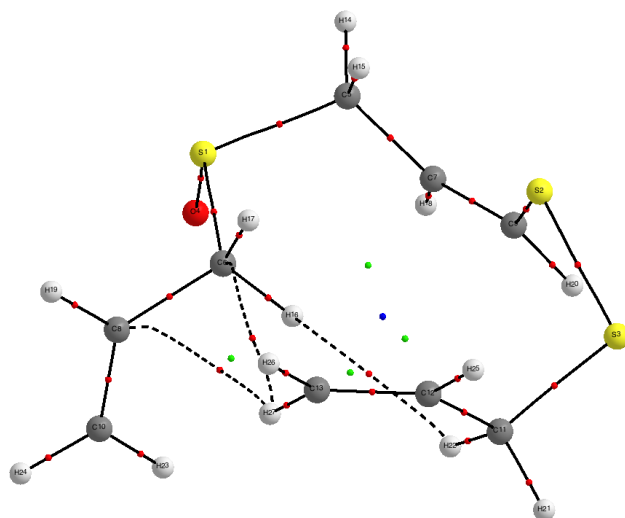

Figure S148. Ajoene\_(Z)\_conformer\_28

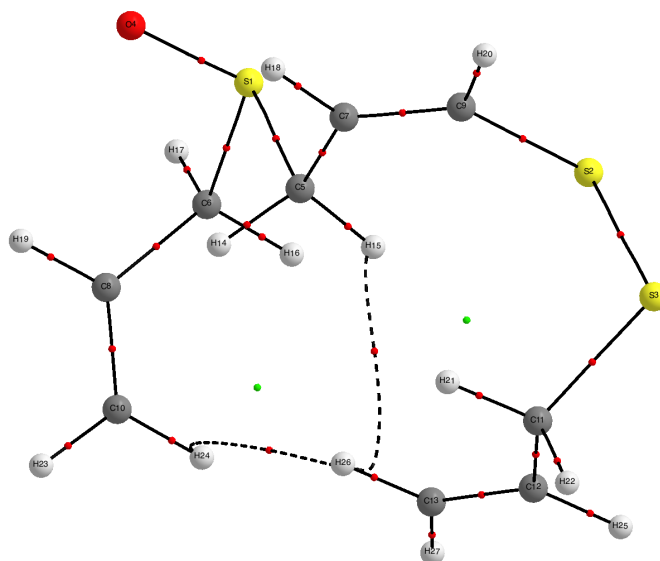

Figure S149. Ajoene\_(Z)\_conformer\_29

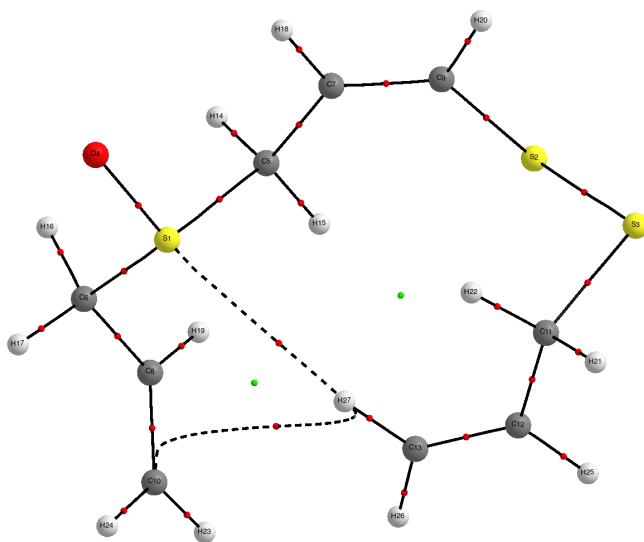

**Figure S150.** Ajoene\_(Z)\_conformer\_30

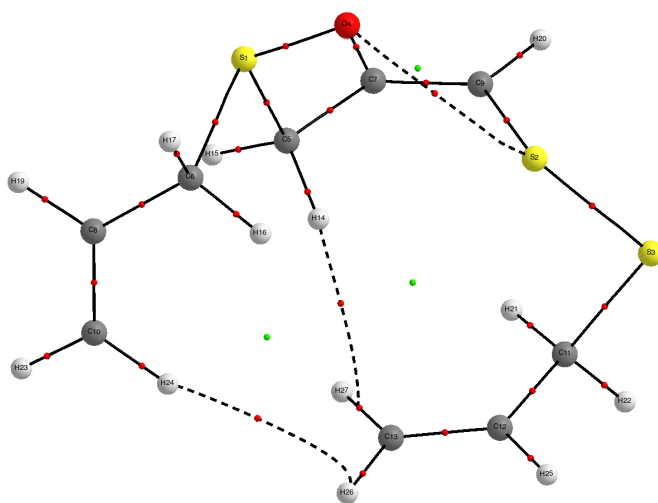

**Figure S151.** Ajoene\_(Z)\_conformer\_31

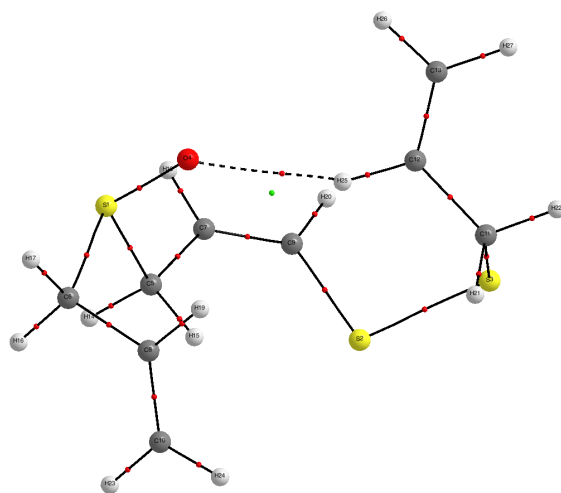

**Figure S152.** Ajoene\_(Z)\_conformer\_32

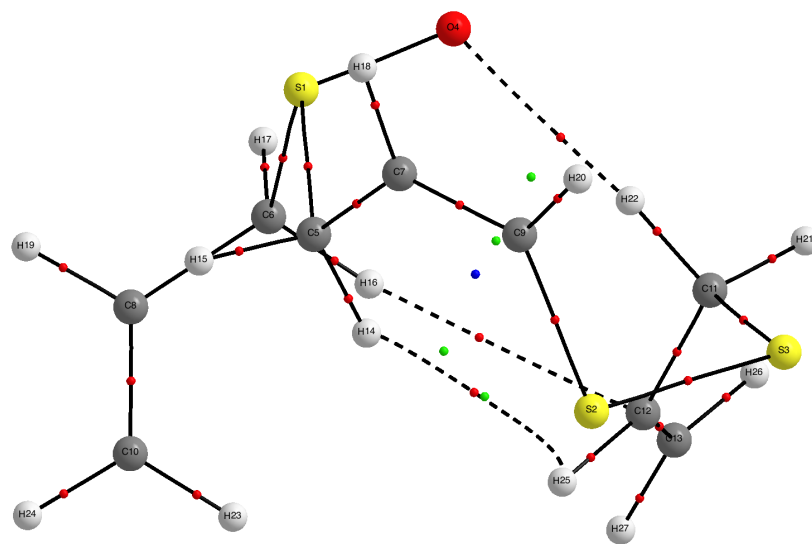

**Figure S153.** Ajoene\_(Z)\_conformer\_33

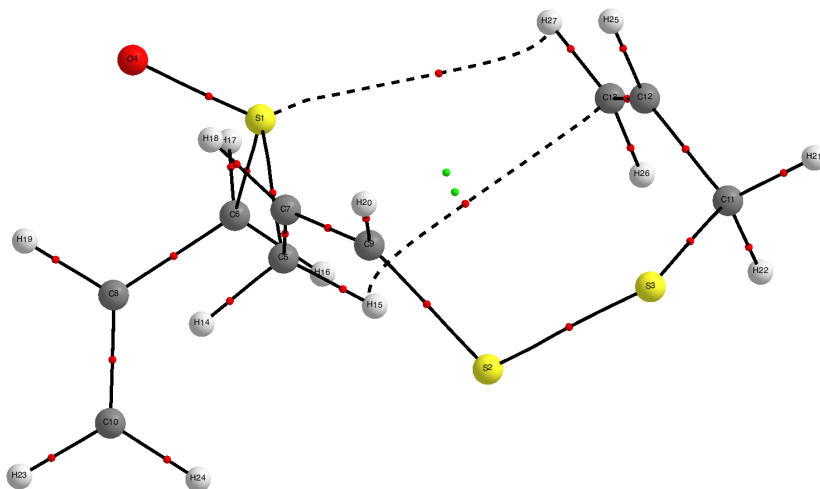

**Figure S154.** Ajoene\_(Z)\_conformer\_34

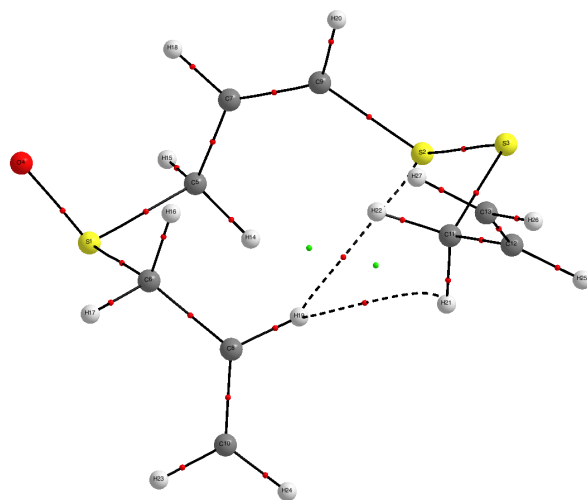

**Figure S155.** Ajoene\_(Z)\_conformer\_35

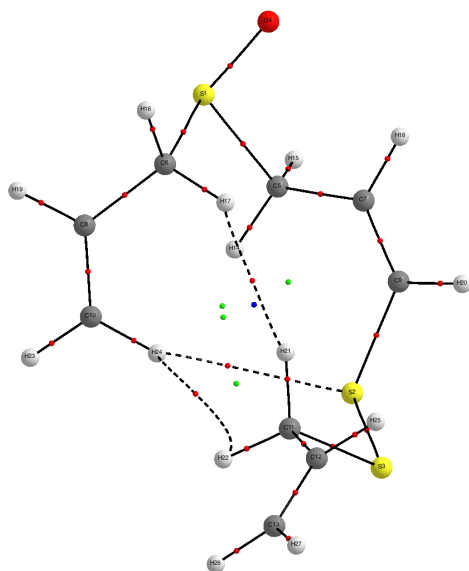

**Figure S156.** Ajoene\_(Z)\_conformer\_36

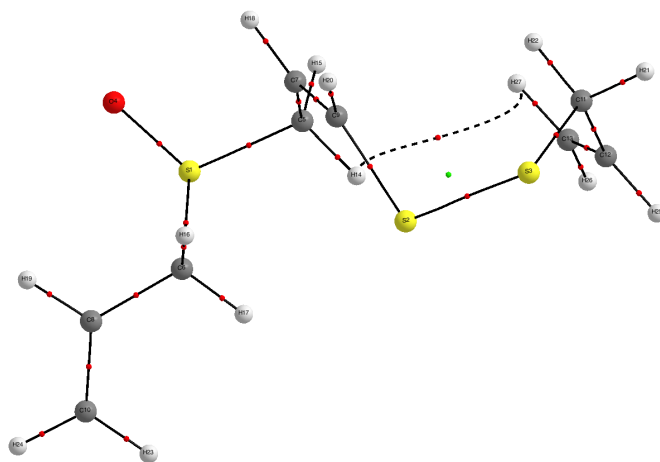

**Figure S157.** Ajoene\_(Z)\_conformer\_37

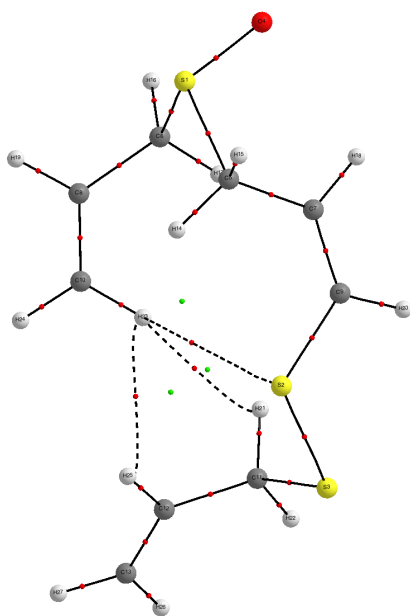

**Figure S158.** Ajoene\_(Z)\_conformer\_38

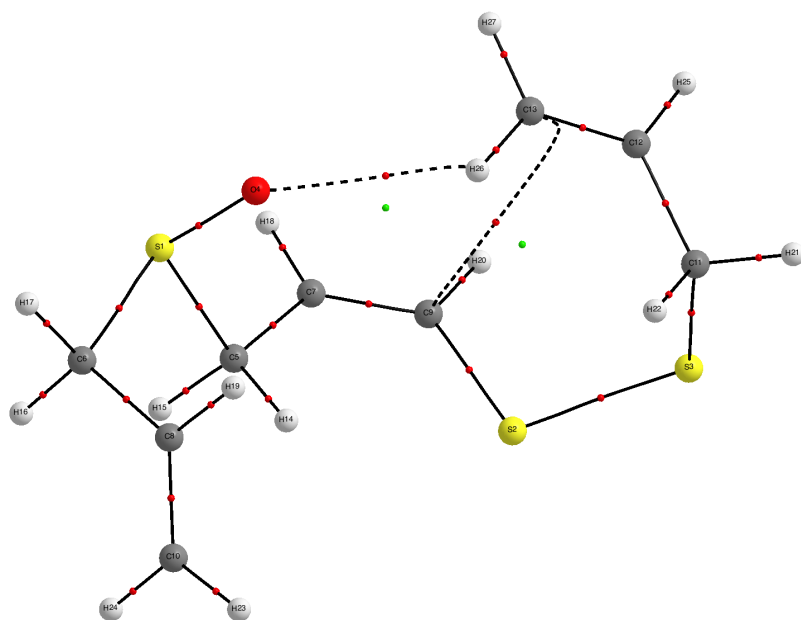

**Figure S159.** Ajoene\_(Z)\_conformer\_39

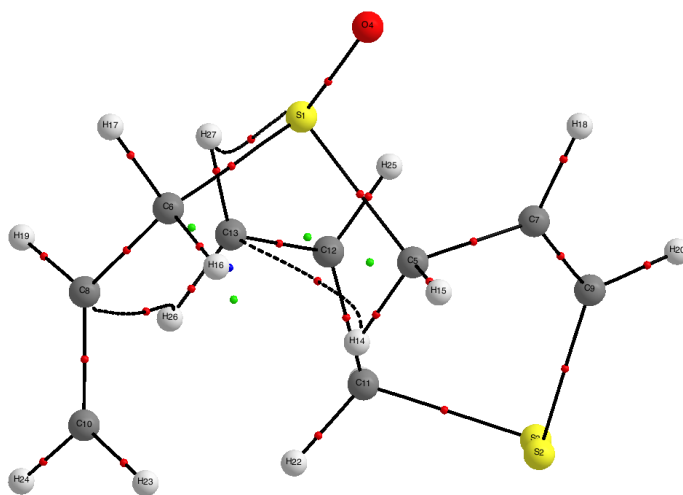

**Figure S160.** Ajoene\_(Z)\_conformer\_40

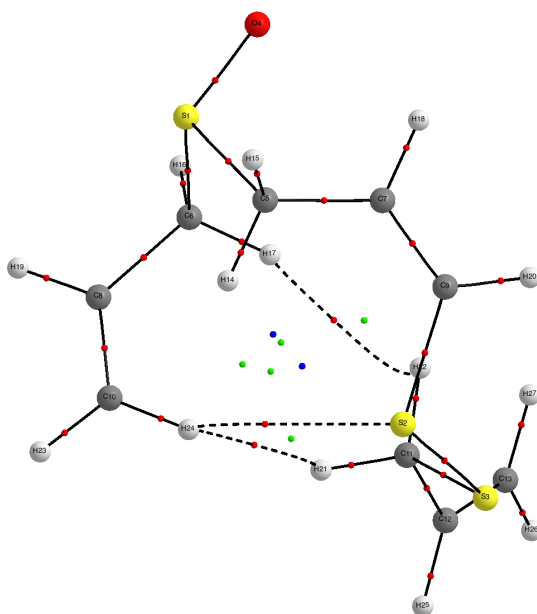

**Figure S161.** Ajoene\_(Z)\_conformer\_41

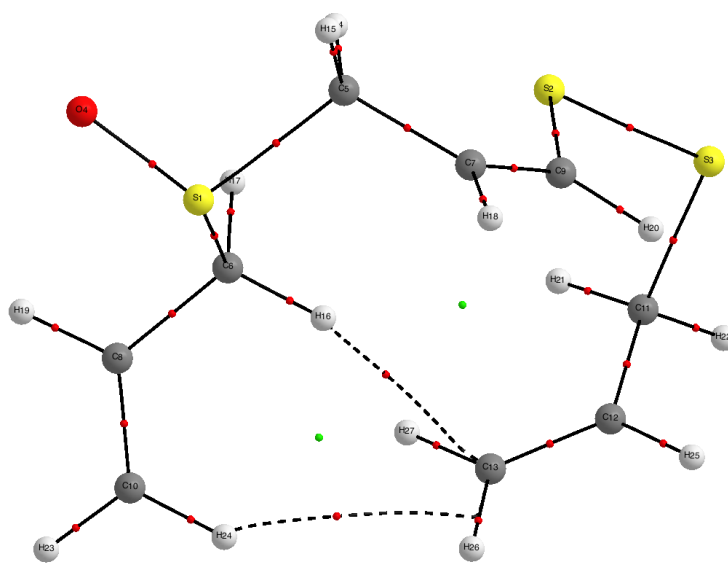

**Figure S162.** Ajoene\_(Z)\_conformer\_42

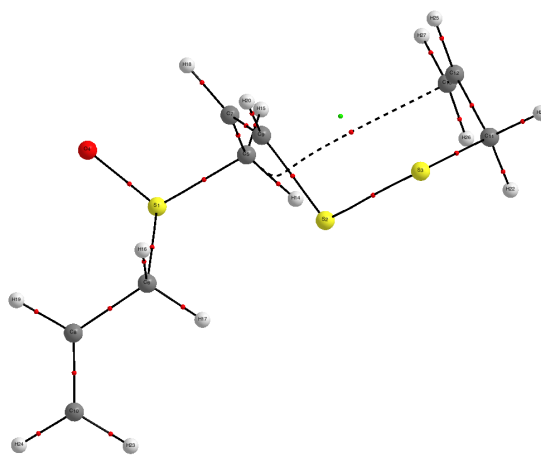

**Figure S163.** Ajoene\_(Z)\_conformer\_43



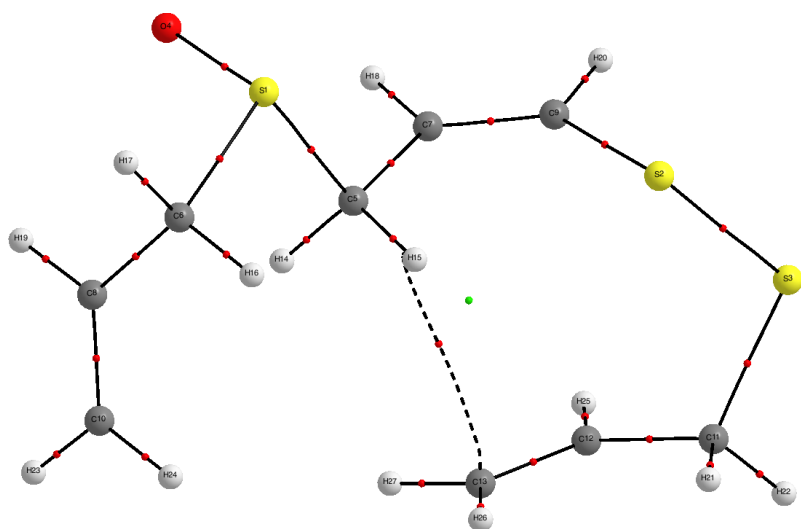

Figure S164. Ajoene\_(Z)\_conformer\_44

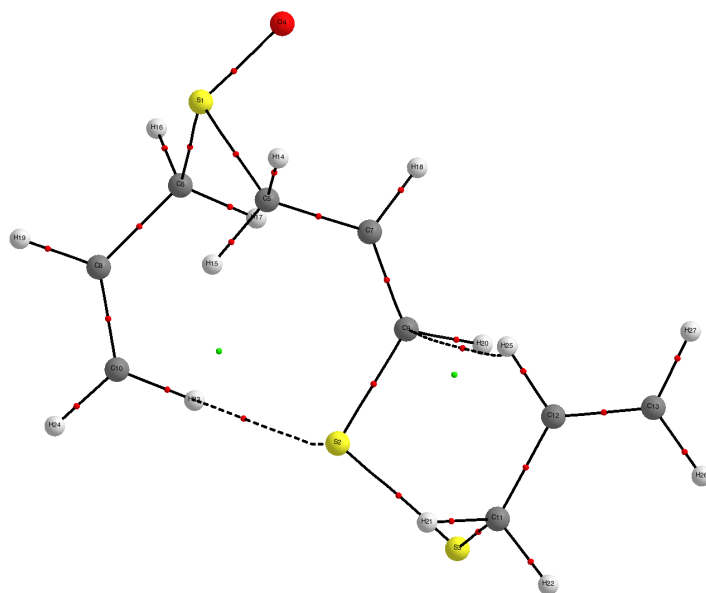

Figure S165. Ajoene\_(Z)\_conformer\_45

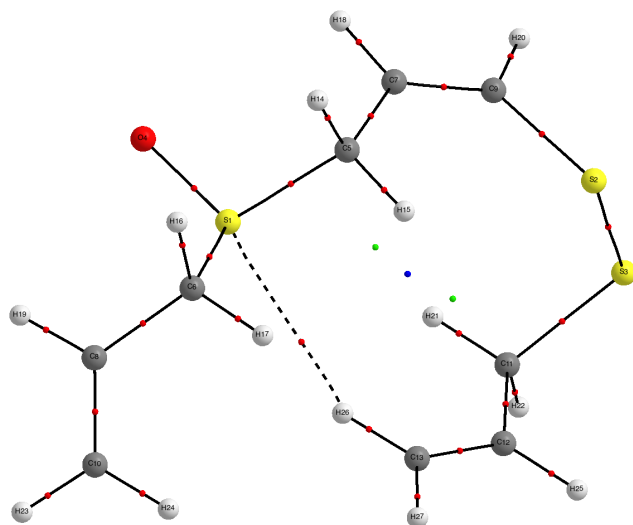

**Figure S166.** Ajoene\_(Z)\_conformer\_46

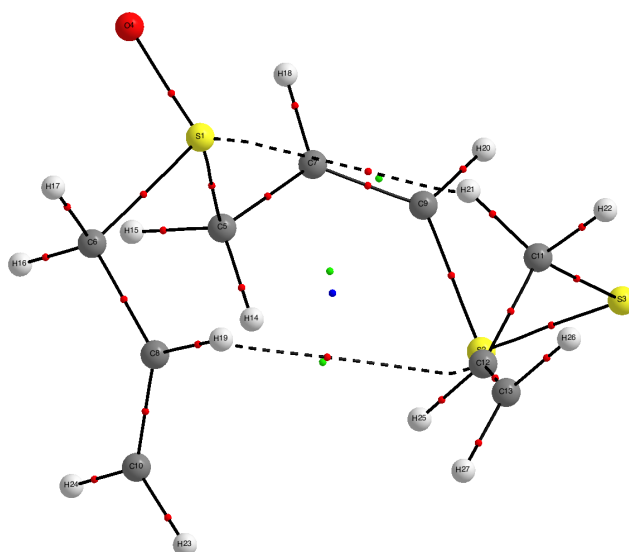

**Figure S167.** Ajoene\_(Z)\_conformer\_47

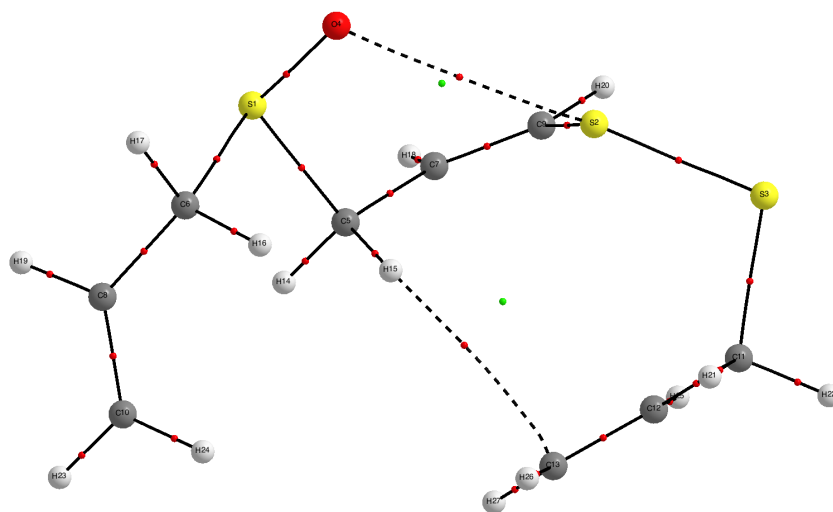

**Figure S168.** Ajoene\_(Z)\_conformer\_48

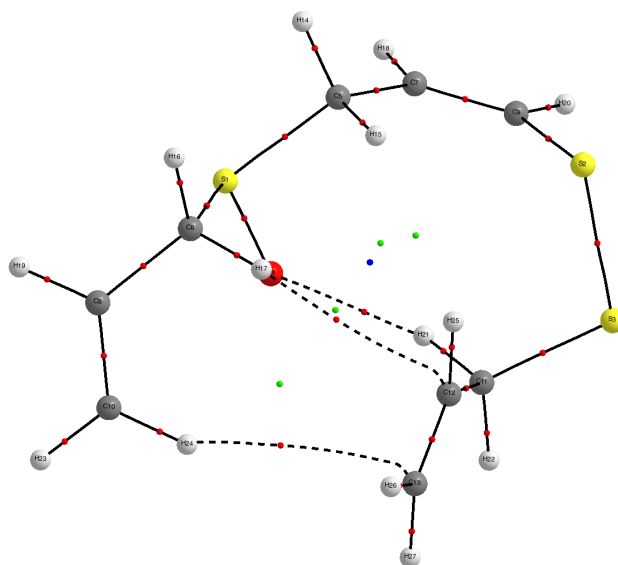

**Figure S169.** Ajoene\_(Z)\_conformer\_49

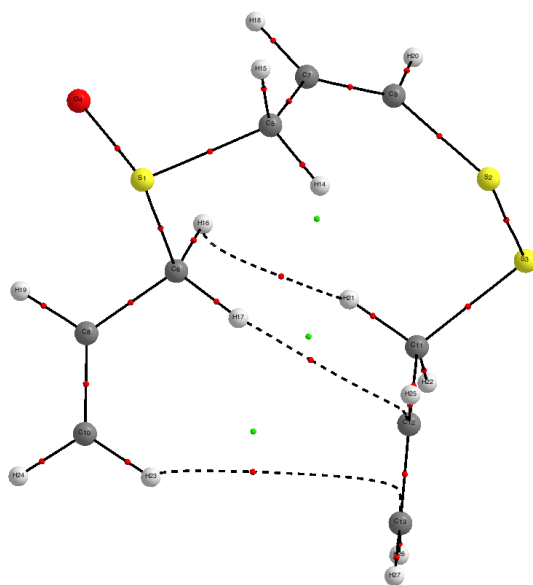

**Figure S170.** Ajoene\_(Z)\_conformer\_50

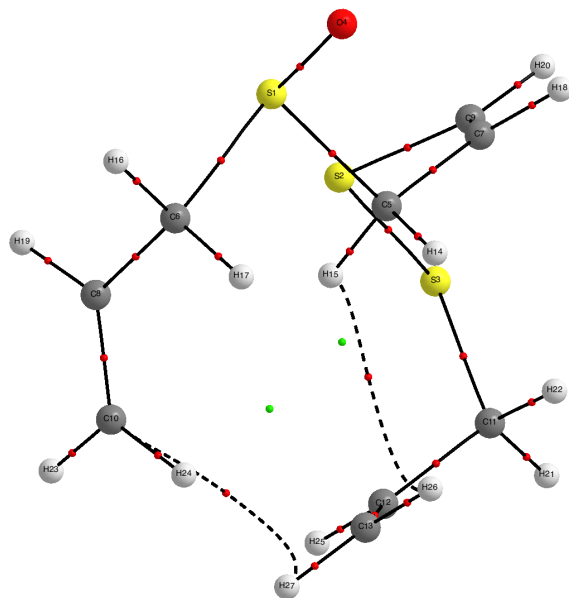

**Figure S171.** Ajoene\_(Z)\_conformer\_51

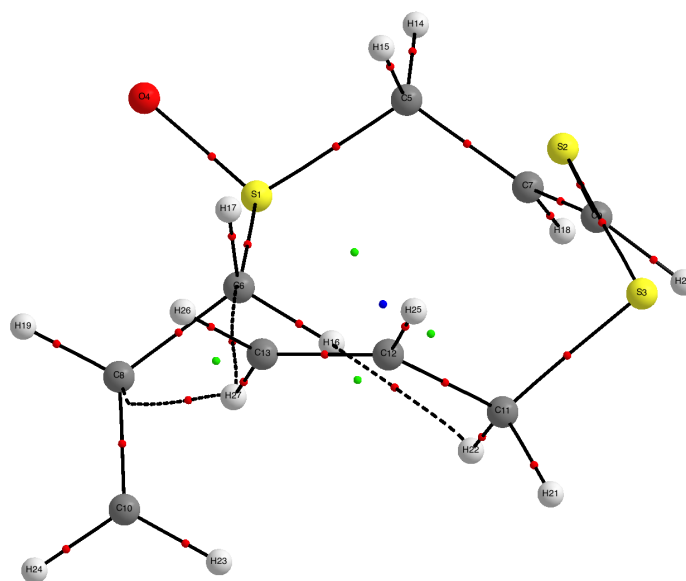

**Figure S172.** Ajoene\_(Z)\_conformer\_52

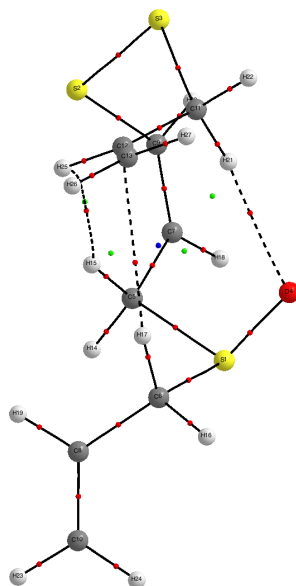

**Figure S173.** Ajoene\_(Z)\_conformer\_53

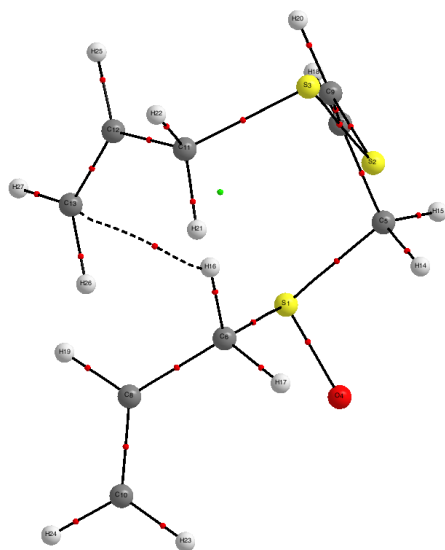

**Figure S174.** Ajoene\_(Z)\_conformer\_54

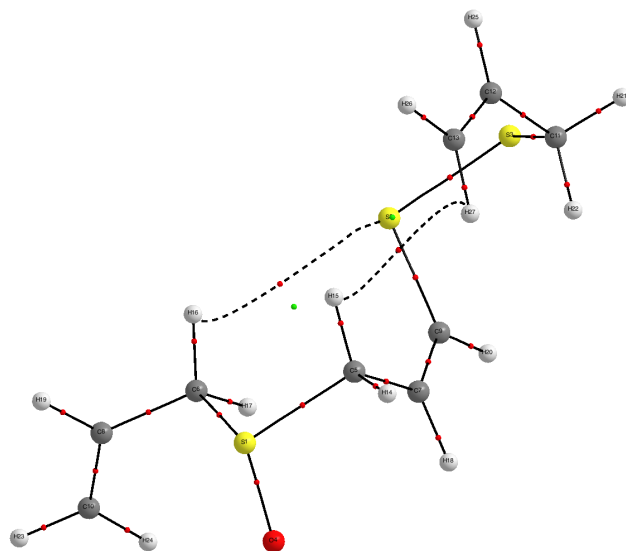

**Figure S175.** Ajoene\_(Z)\_conformer\_55

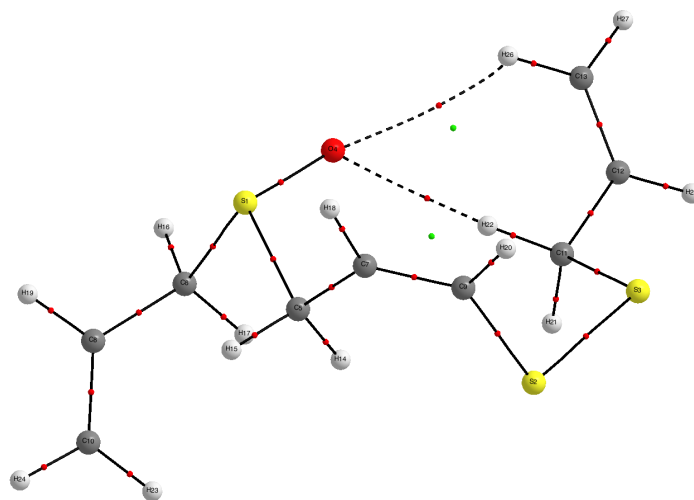

**Figure S176.** Ajoene\_(Z)\_conformer\_56

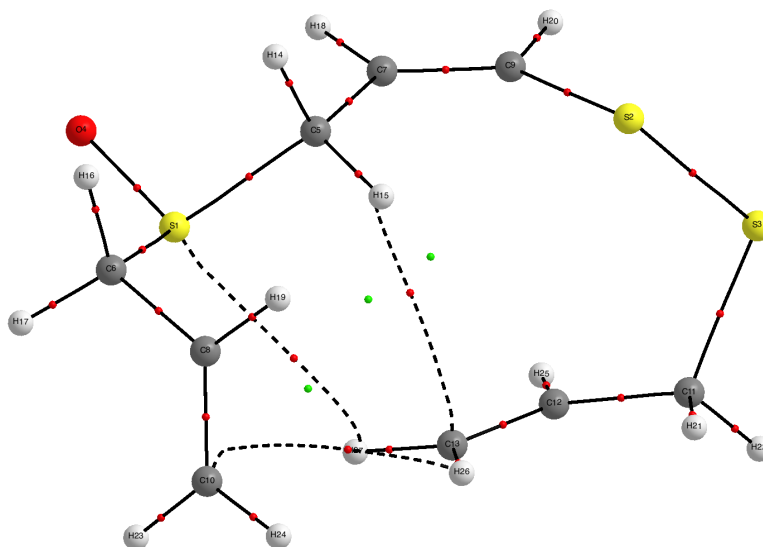

**Figure S177.** Ajoene\_(Z)\_conformer\_57

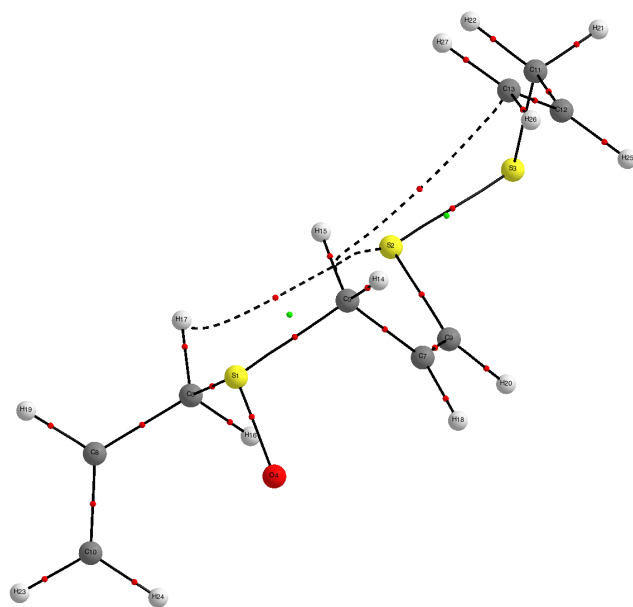

**Figure S178.** Ajoene\_(Z)\_conformer\_58

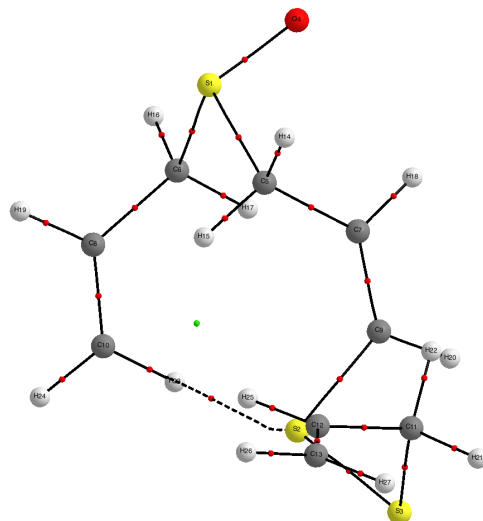

**Figure S179.** Ajoene\_(Z)\_conformer\_59



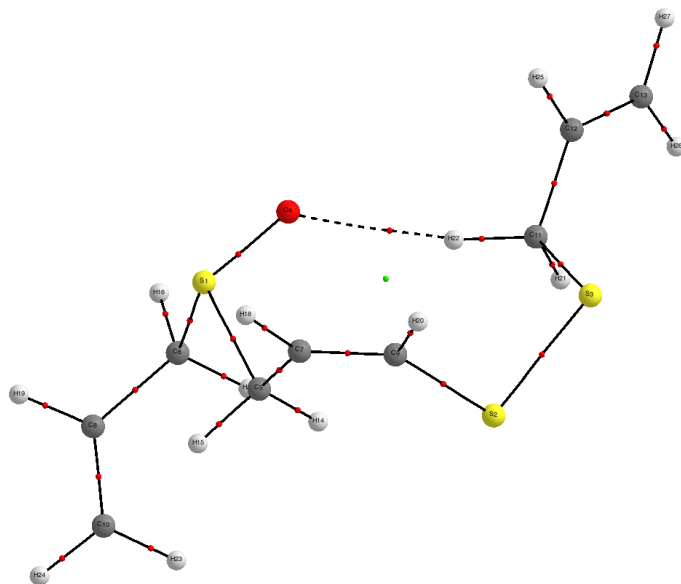

**Figure S180.** Ajoene\_(Z)\_conformer\_60

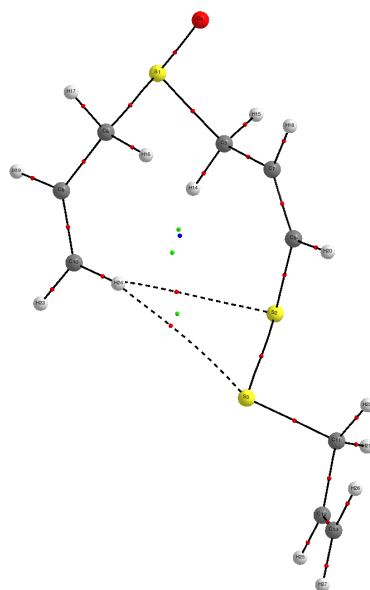

**Figure S181.** Ajoene\_(Z)\_conformer\_61

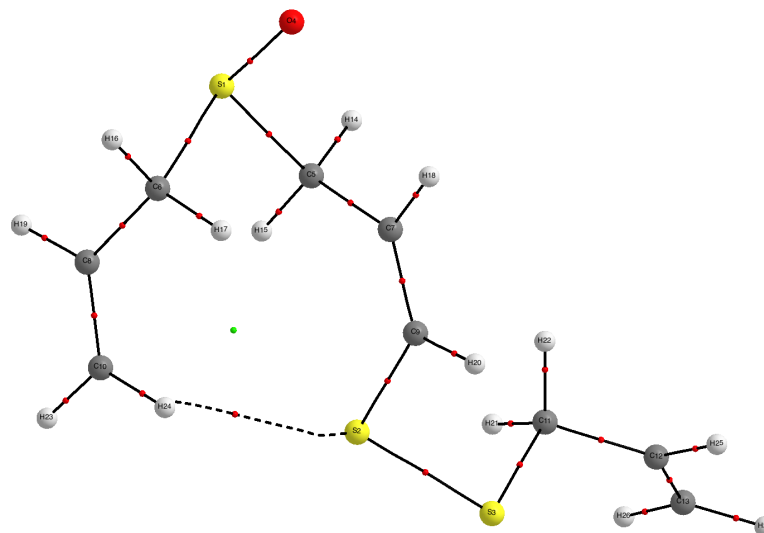

**Figure S182.** Ajoene\_(Z)\_conformer\_62

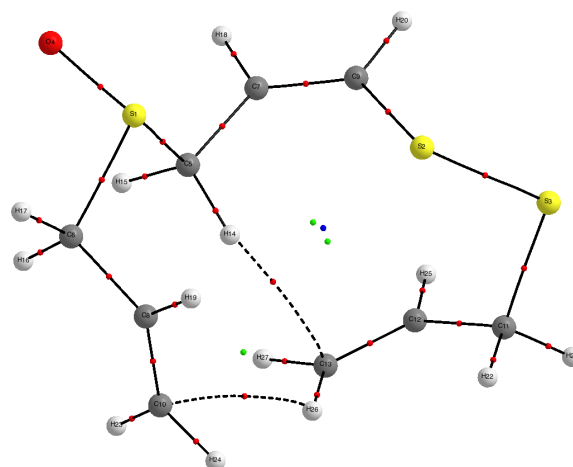

**Figure S183.** Ajoene\_(Z)\_conformer\_63

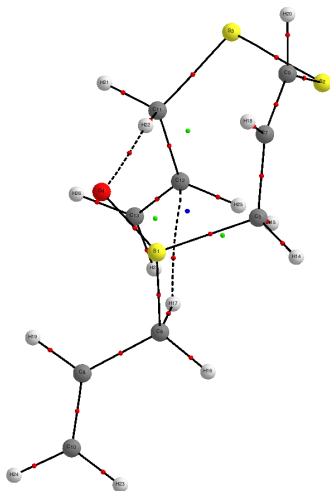

**Figure S184.** Ajoene\_(Z)\_conformer\_64

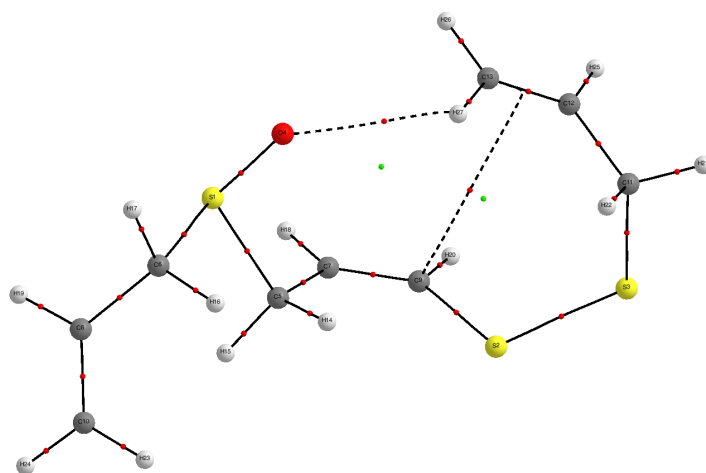

**Figure S185.** Ajoene\_(Z)\_conformer\_65

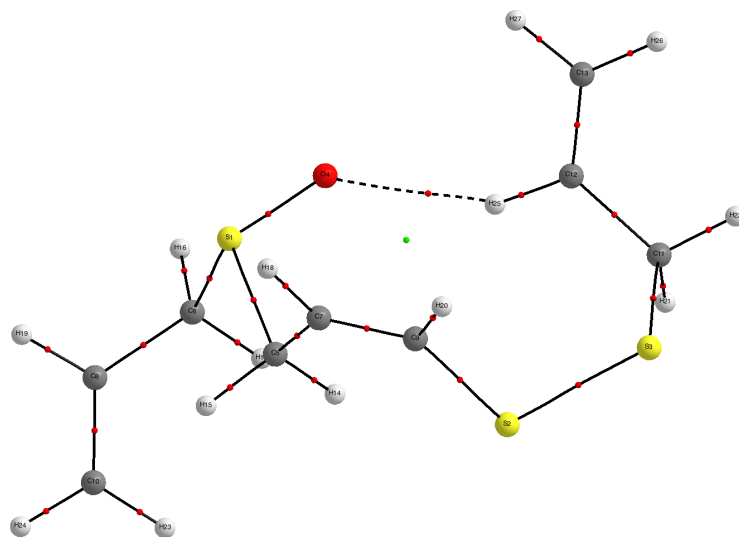

**Figure S186.** Ajoene\_(Z)\_conformer\_66

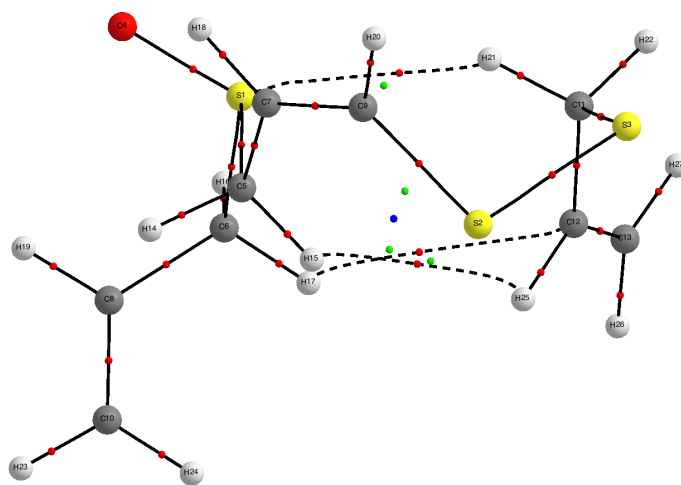

**Figure S187.** Ajoene\_(Z)\_conformer\_67

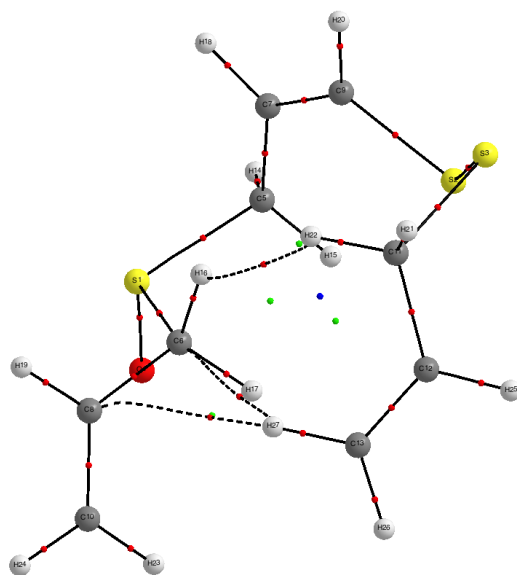

**Figure S188.** Ajoene\_(Z)\_conformer\_68

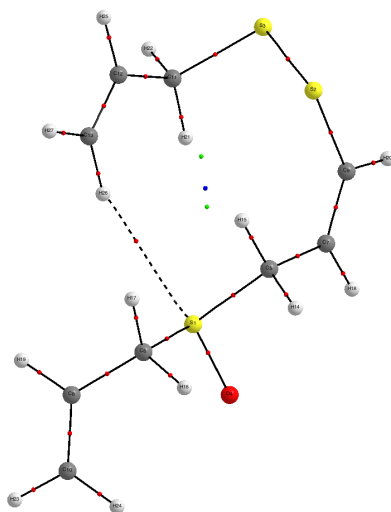

**Figure S189.** Ajoene\_(Z)\_conformer\_69

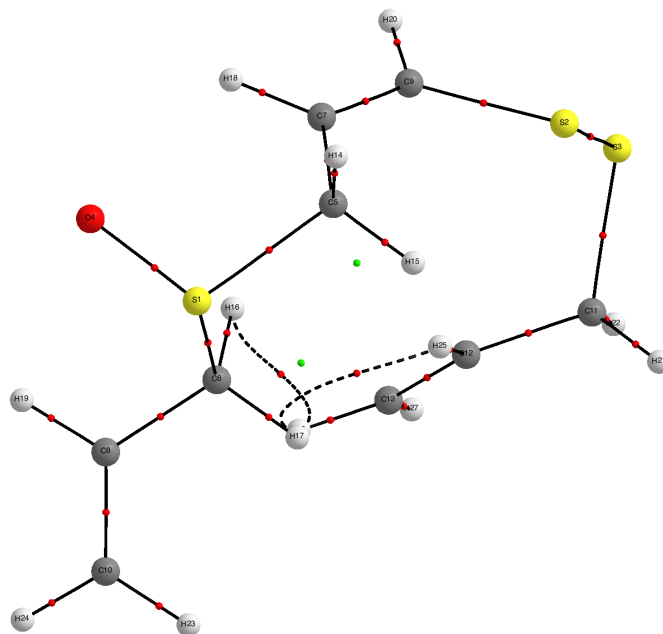

**Figure S190.** Ajoene\_(Z)\_conformer\_70

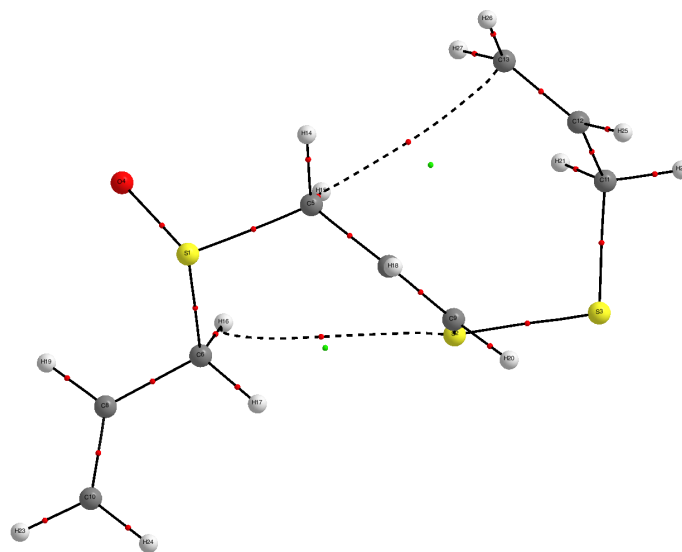

**Figure S191.** Ajoene\_(Z)\_conformer\_71

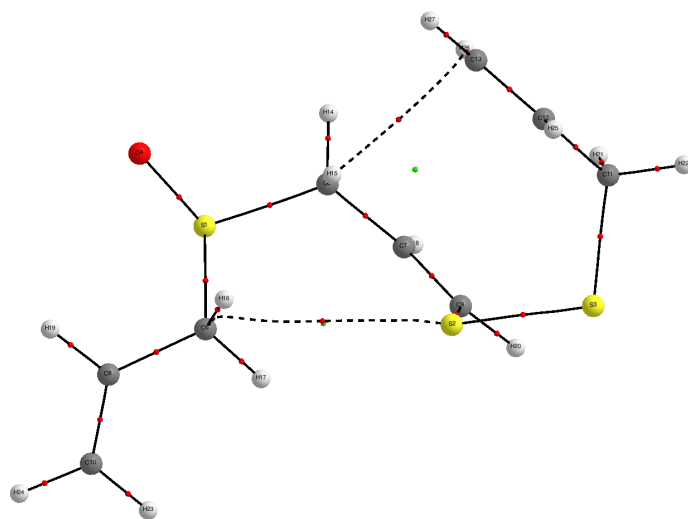

**Figure S192.** Ajoene\_(Z)\_conformer\_72

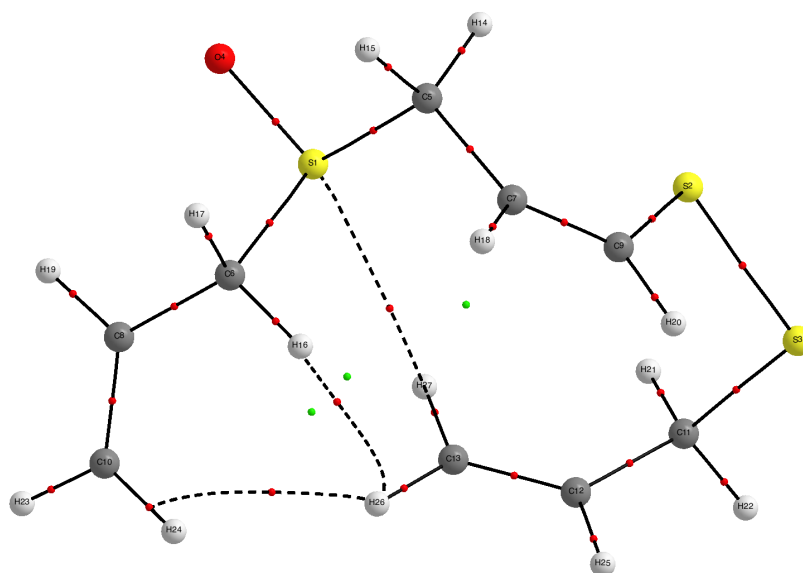

**Figure S193.** Ajoene\_(Z)\_conformer\_73

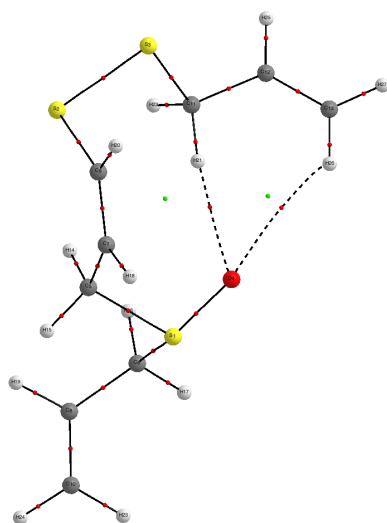

**Figure S194.** Ajoene\_(Z)\_conformer\_74

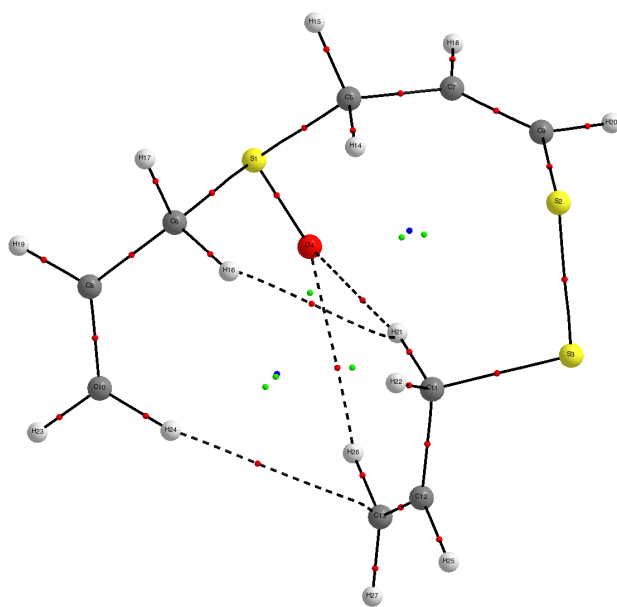

**Figure S195.** Ajoene\_(Z)\_conformer\_75



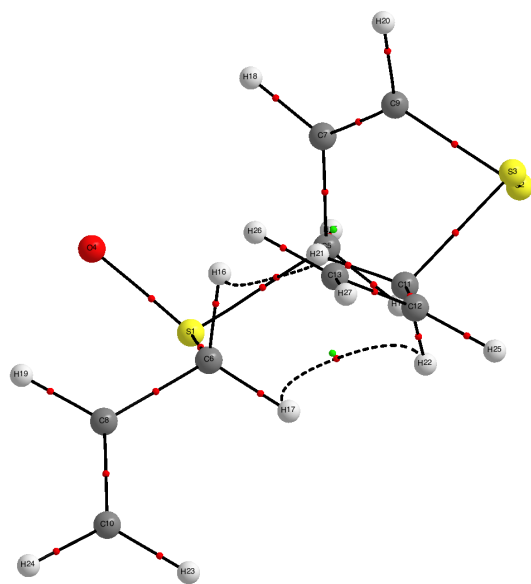

**Figure S196.** Ajoene\_(Z)\_conformer\_76

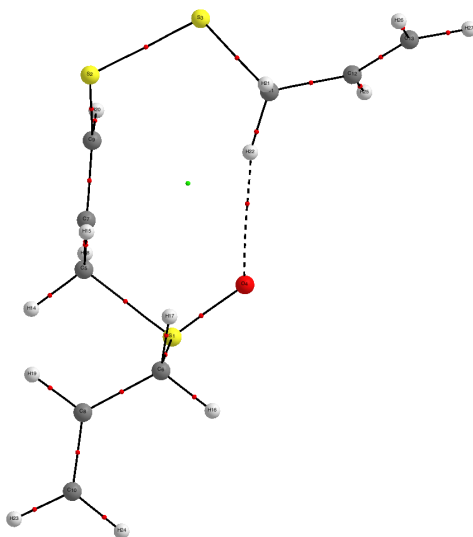

**Figure S197.** Ajoene\_(Z)\_conformer\_77

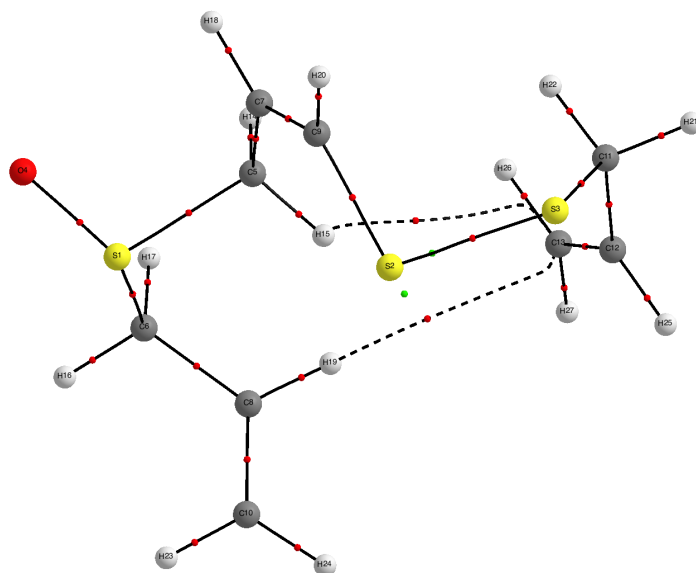

**Figure S198.** Ajoene\_(Z)\_conformer\_78

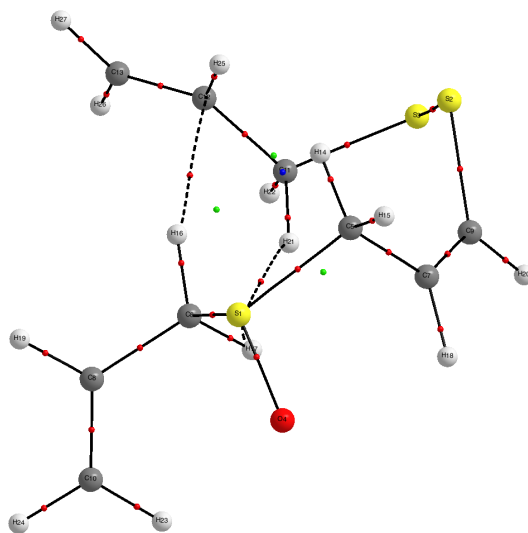

**Figure S199.** Ajoene\_(Z)\_conformer\_79

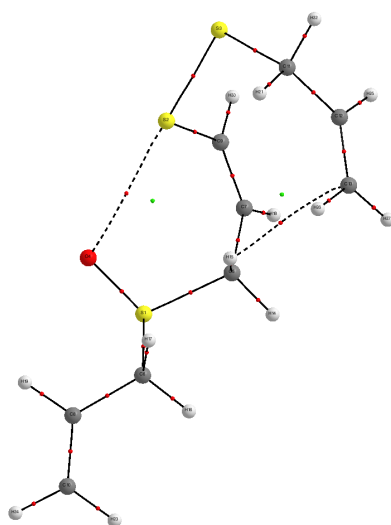

**Figure S200.** Ajoene\_(Z)\_conformer\_80

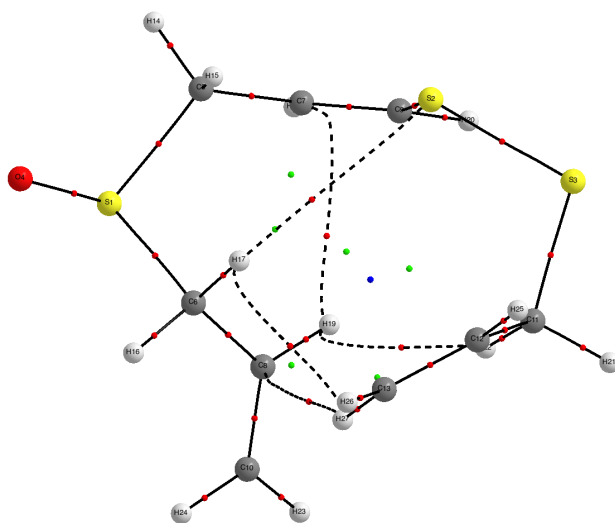

**Figure S201.** Ajoene\_(Z)\_conformer\_81

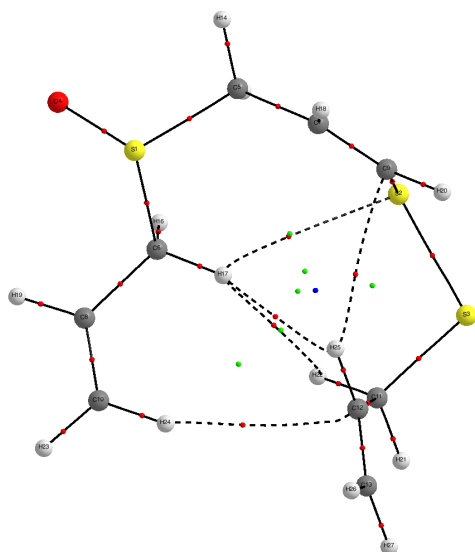

**Figure S202.** Ajoene\_(Z)\_conformer\_82

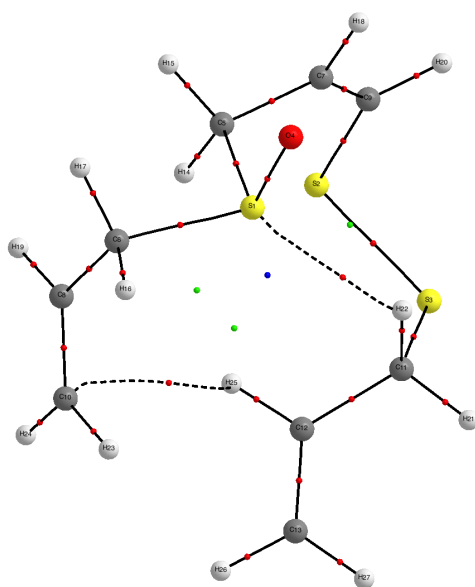

**Figure S203.** Ajoene\_(Z)\_conformer\_83

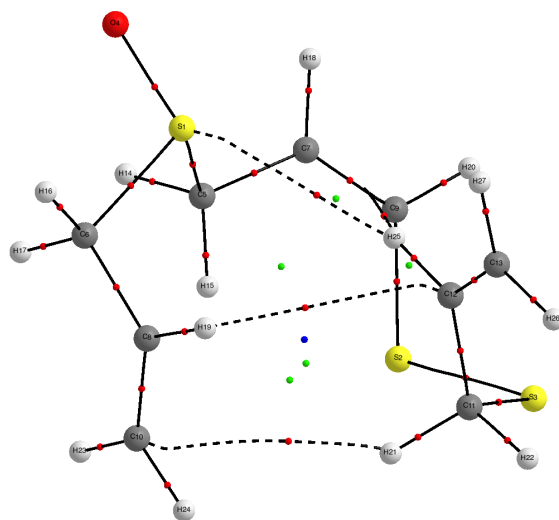

**Figure S204.** Ajoene\_(Z)\_conformer\_84

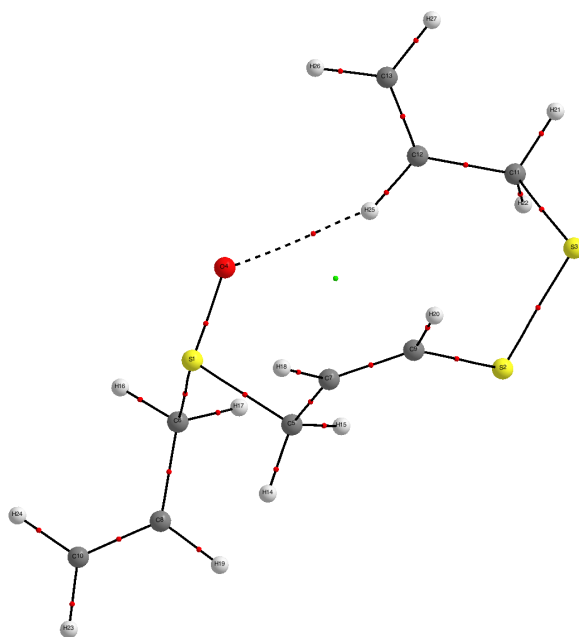

**Figure S205.** Ajoene\_(Z)\_conformer\_85

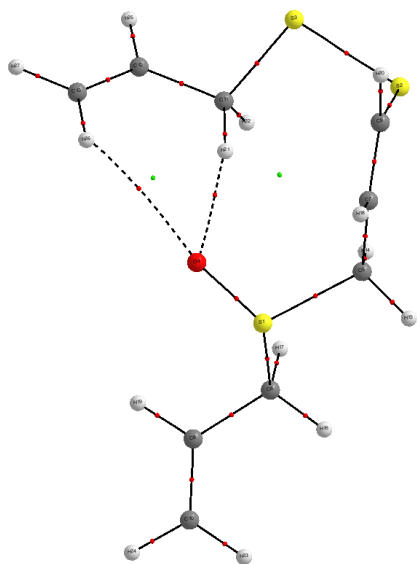

**Figure S206.** Ajoene\_(Z)\_conformer\_86

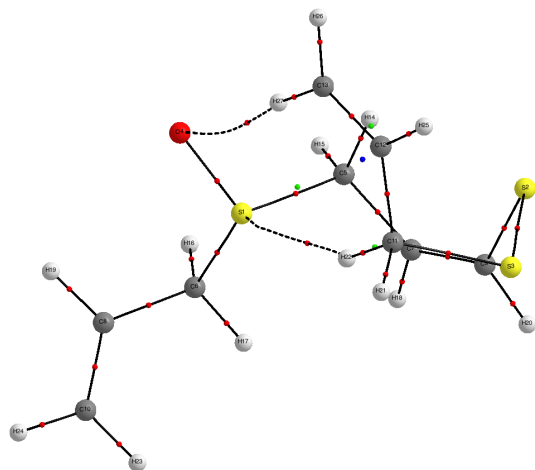

**Figure S207.** Ajoene\_(Z)\_conformer\_87

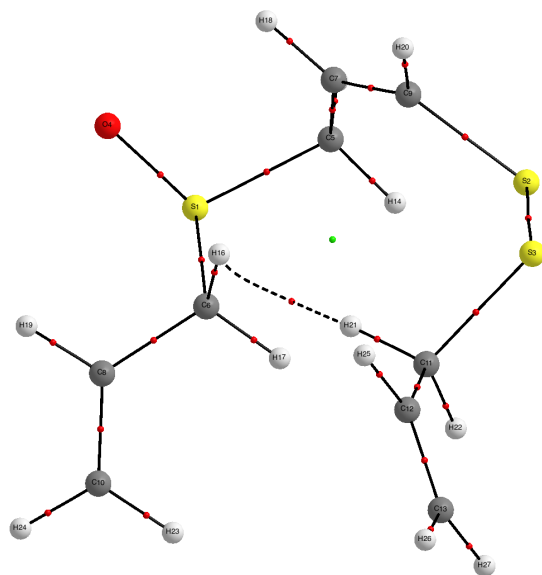

**Figure S208.** Ajoene\_(Z)\_conformer\_88

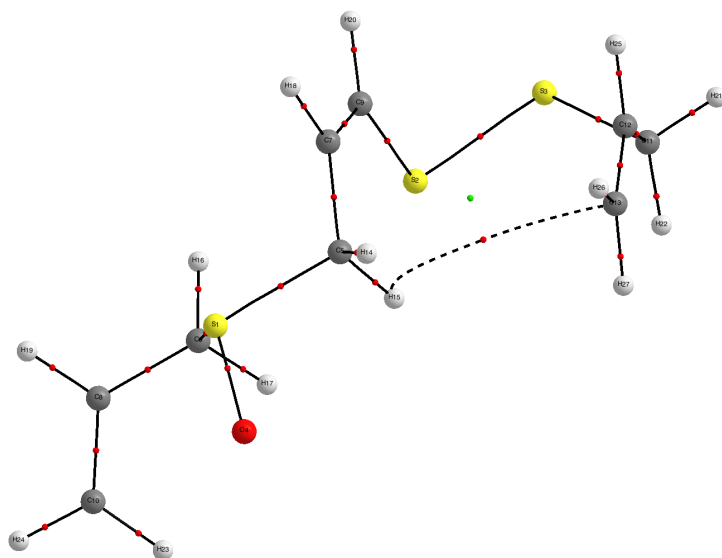

**Figure S209.** Ajoene\_(Z)\_conformer\_89

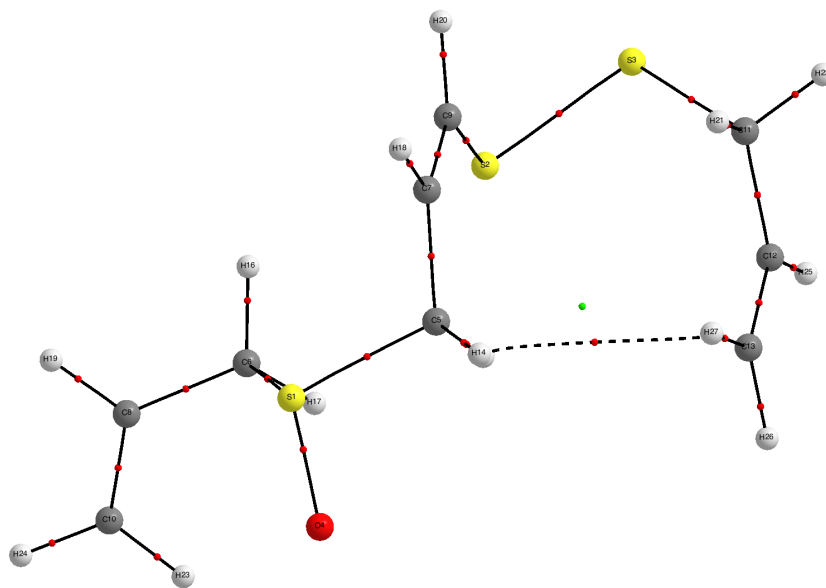

**Figure S210.** Ajoene\_(Z)\_conformer\_90

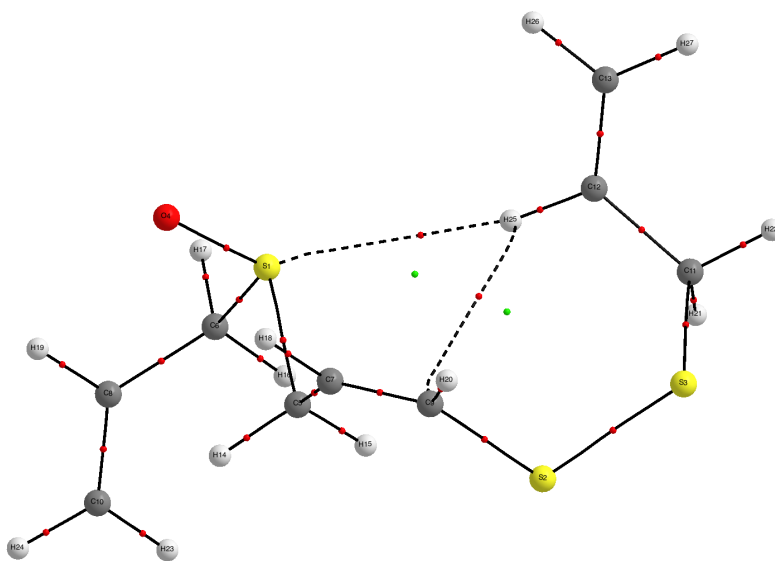

**Figure S211.** Ajoene\_(Z)\_conformer\_91



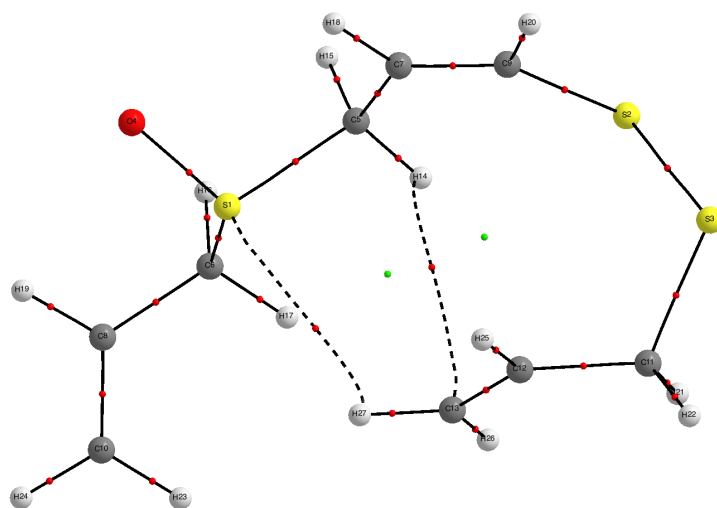

**Figure S212.** Ajoene\_(Z)\_conformer\_92

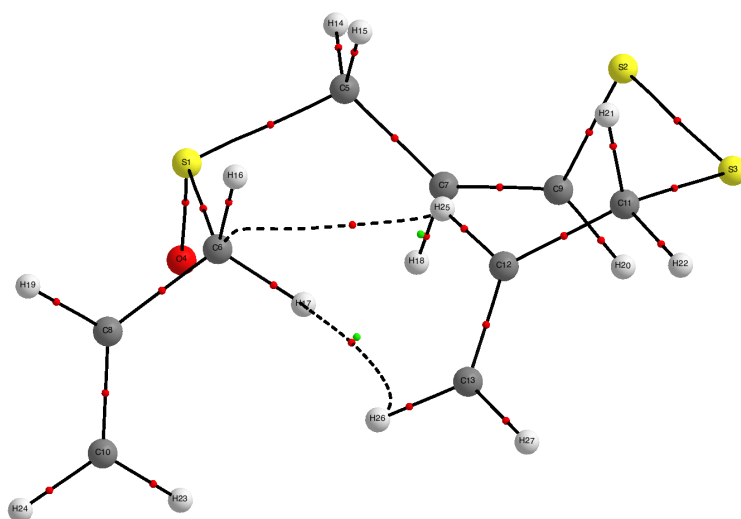

**Figure S213.** Ajoene\_(Z)\_conformer\_93

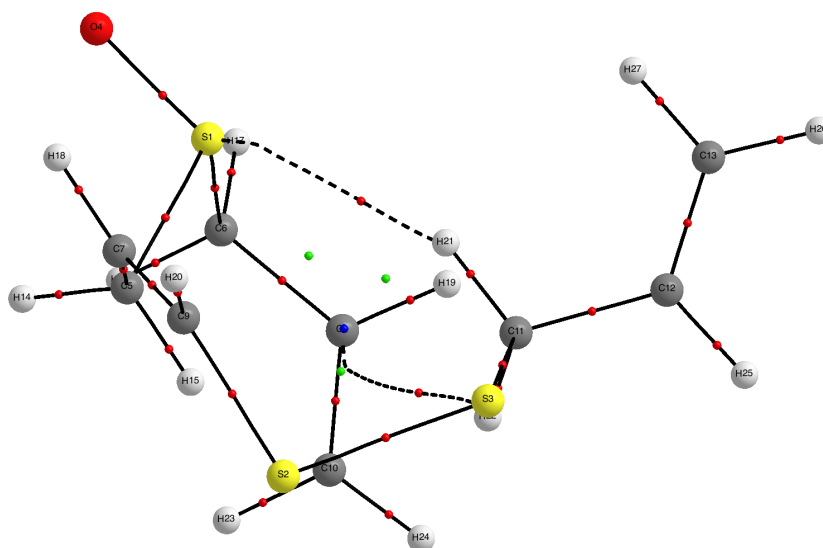

**Figure S214.** Ajoene\_(Z)\_conformer\_94

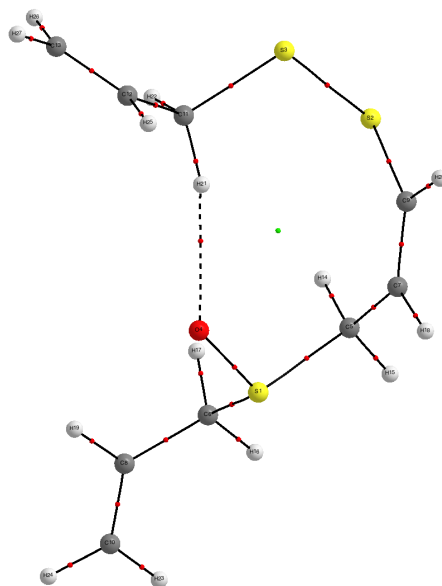

**Figure S215.** Ajoene\_(Z)\_conformer\_95

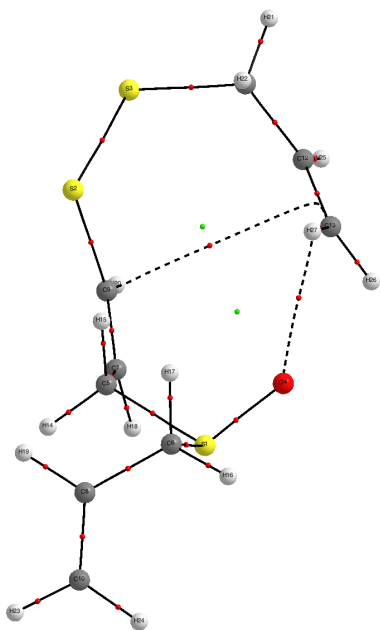

**Figure S216.** Ajoene\_(Z)\_conformer\_96

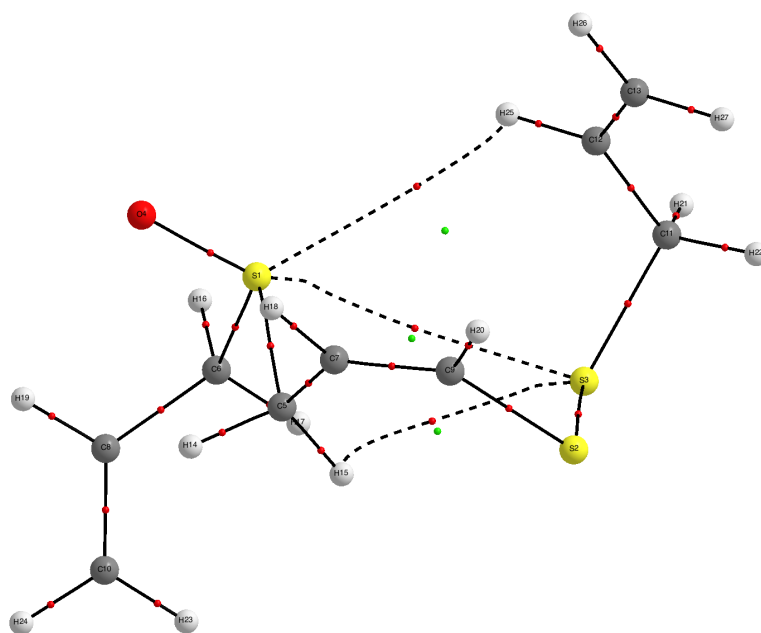

**Figure S217.** Ajoene\_(Z)\_conformer\_97

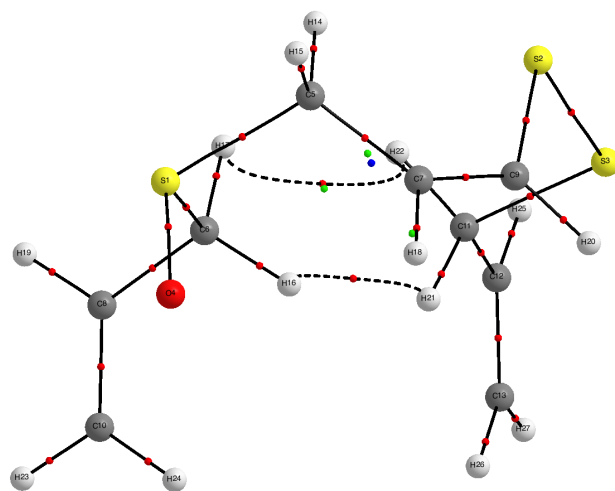

**Figure S218.** Ajoene\_(Z)\_conformer\_98

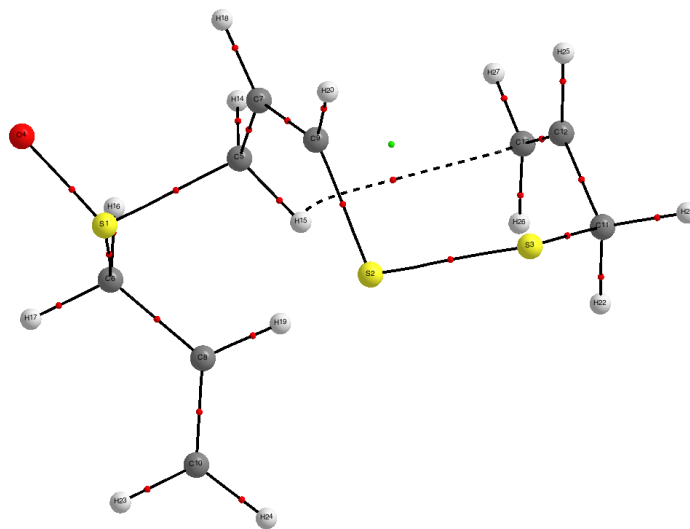

**Figure S219.** Ajoene\_(Z)\_conformer\_99

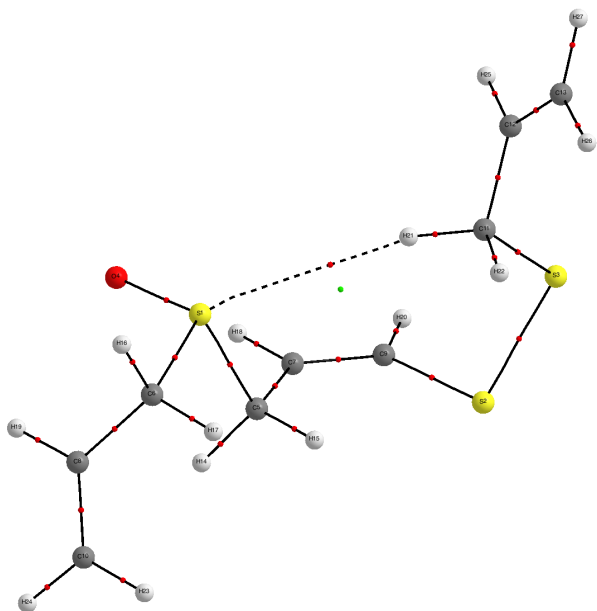

**Figure S220.** Ajoene\_(Z)\_conformer\_100

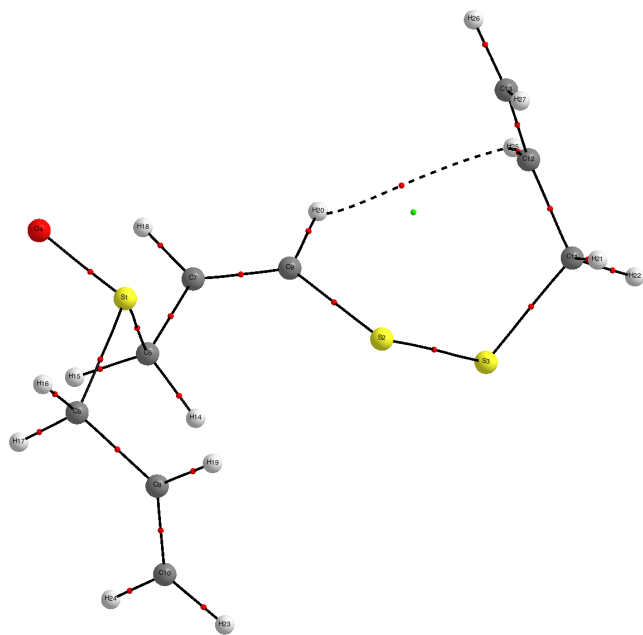

**Figure S221.** Ajoene\_(Z)\_conformer\_101

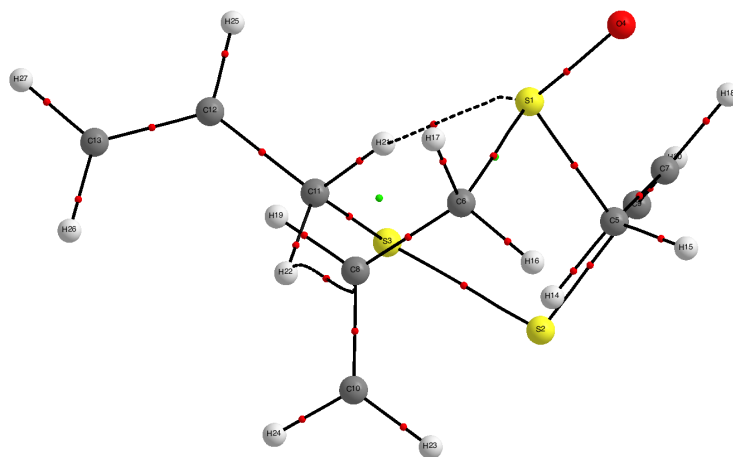

**Figure S222.** Ajoene\_(Z)\_conformer\_102

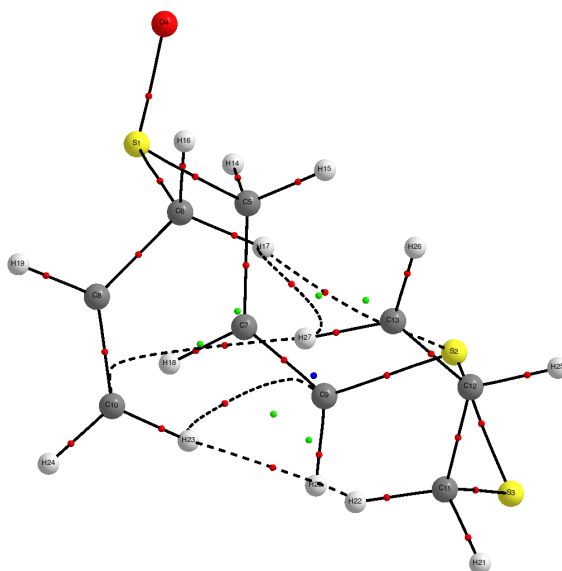

**Figure S223.** Ajoene\_(Z)\_conformer\_103

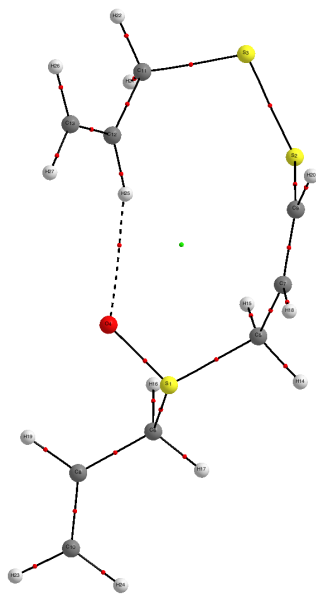

**Figure S224.** Ajoene\_(Z)\_conformer\_104

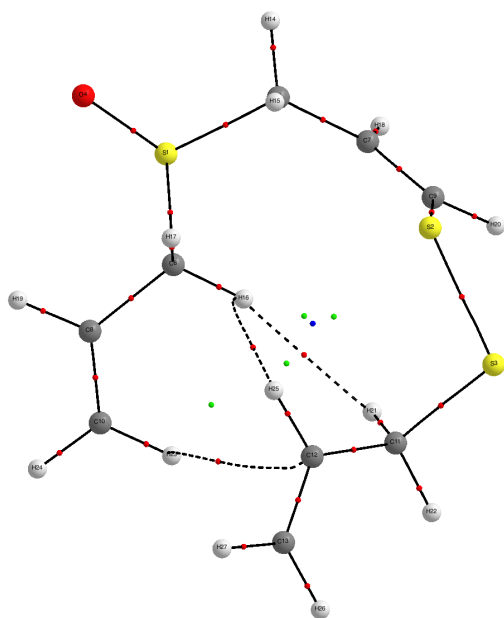

**Figure S225.** Ajoene\_(Z)\_conformer\_105

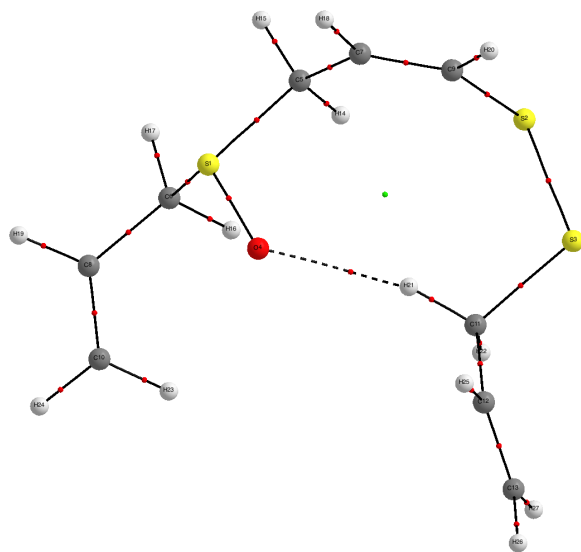

**Figure S226.** Ajoene\_(Z)\_conformer\_106

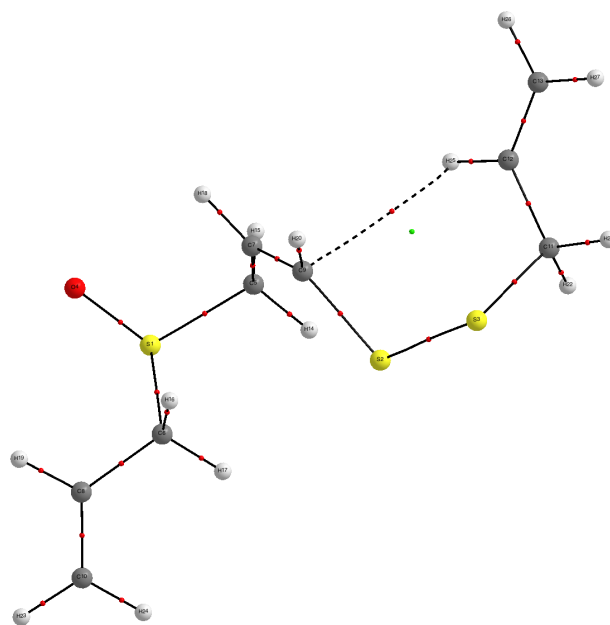

**Figure S227.** Ajoene\_(Z)\_conformer\_107



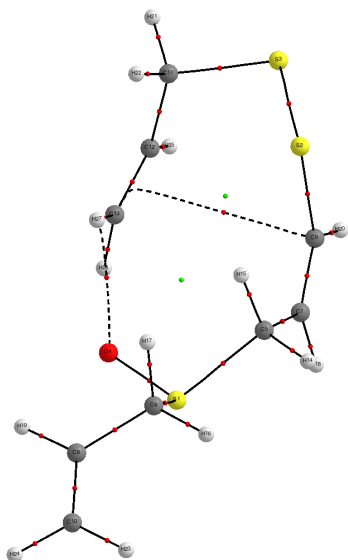

**Figure S228.** Ajoene\_(Z)\_conformer\_108

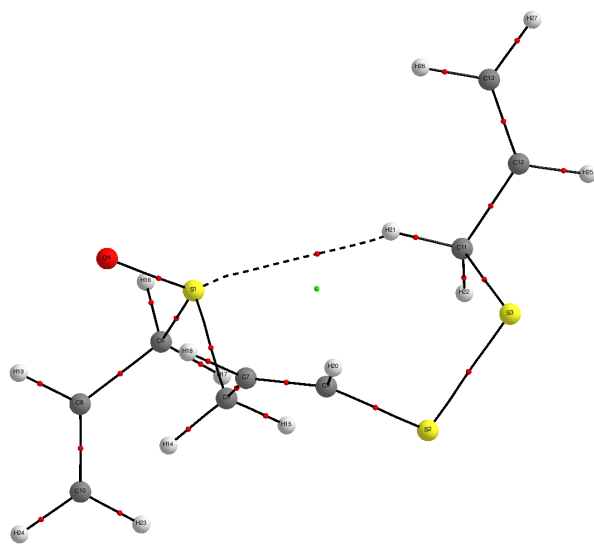

**Figure S229.** Ajoene\_(Z)\_conformer\_109

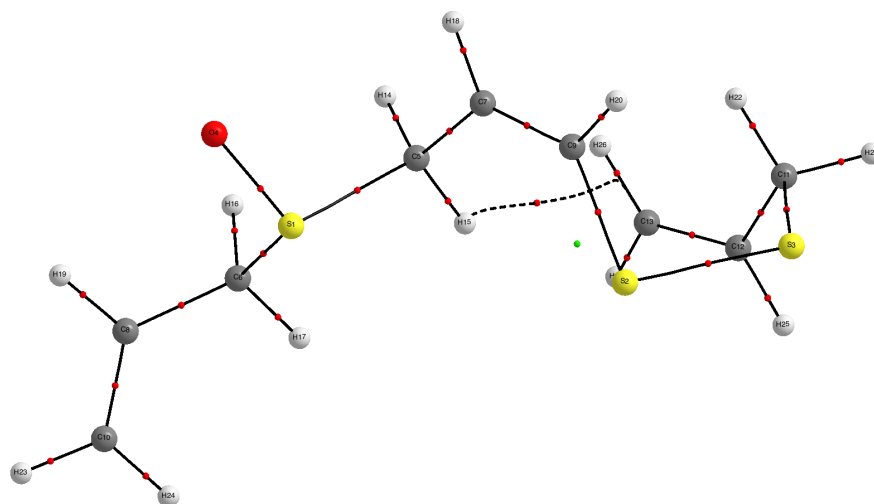

**Figure S230.** Ajoene\_(Z)\_conformer\_110

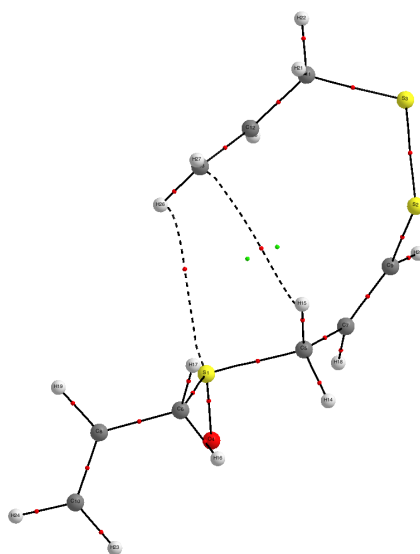

**Figure S231.** Ajoene\_(Z)\_conformer\_111

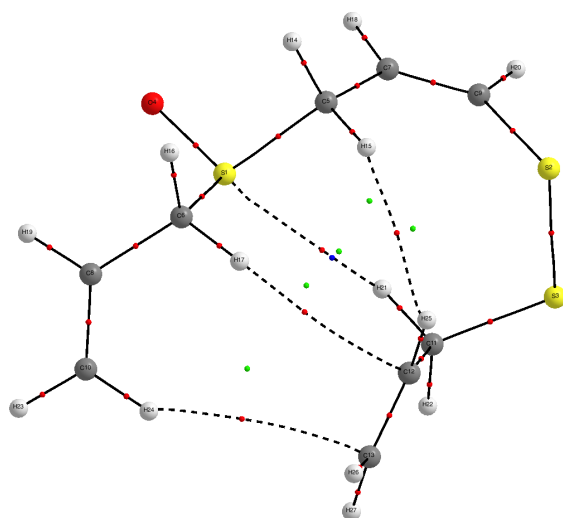

**Figure S232.** Ajoene\_(Z)\_conformer\_112

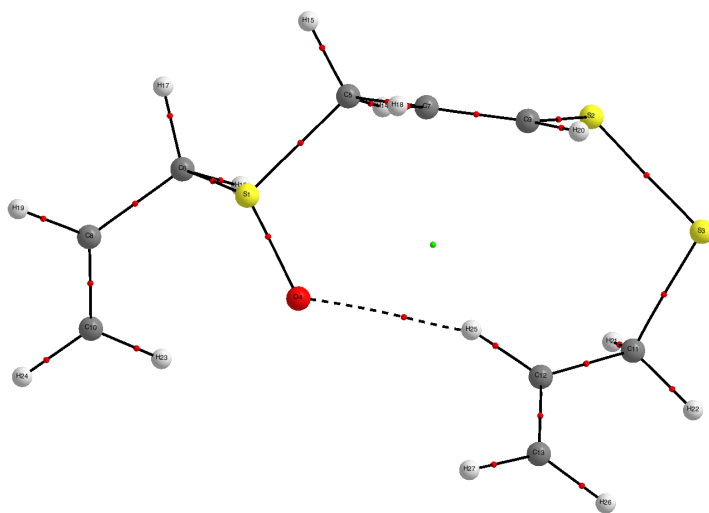

**Figure S233.** Ajoene\_(Z)\_conformer\_113

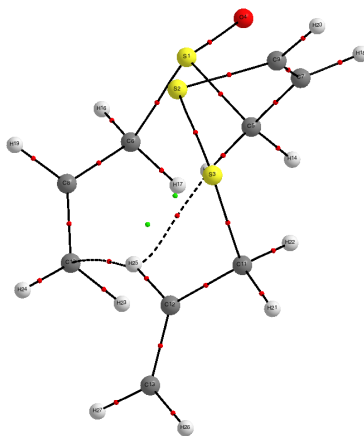

**Figure S234.** Ajoene\_(Z)\_conformer\_114

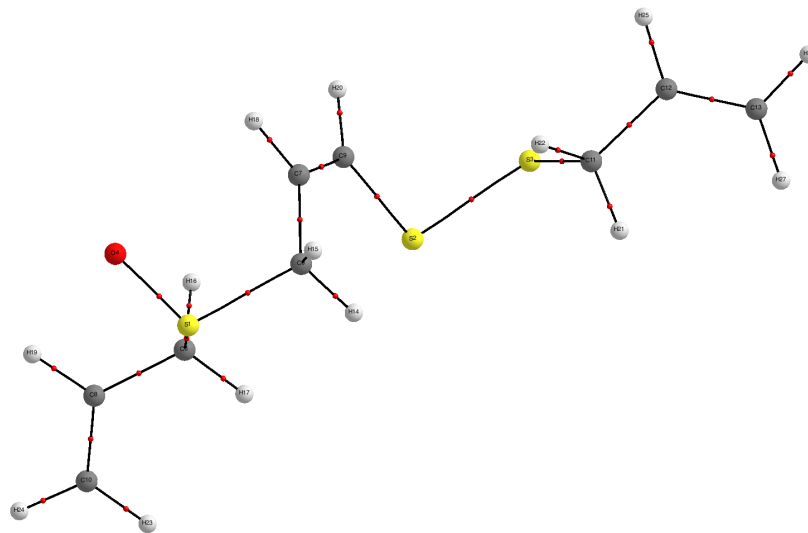

**Figure S235.** Ajoene\_(Z)\_conformer\_115

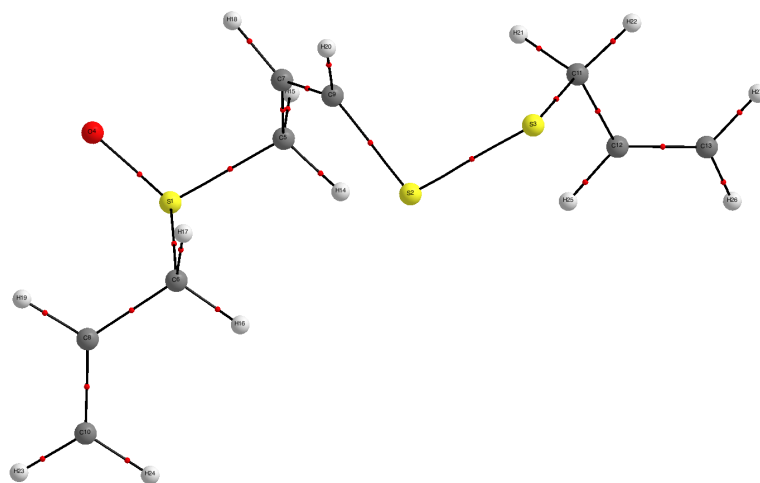

**Figure S236.** Ajoene\_(Z)\_conformer\_116

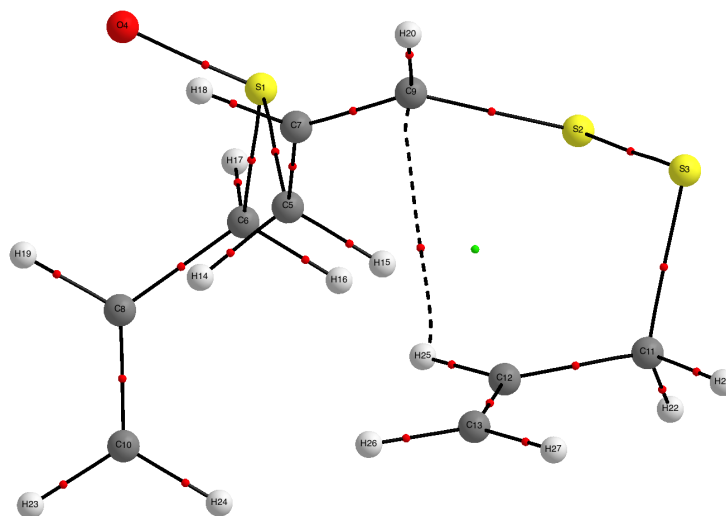

**Figure S237.** Ajoene\_(Z)\_conformer\_117

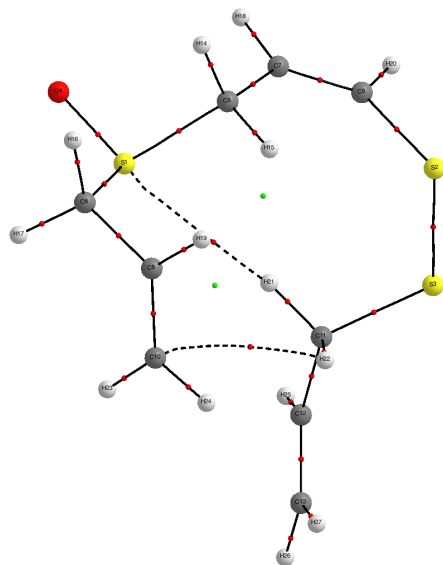

**Figure S238.** Ajoene\_(Z)\_conformer\_118

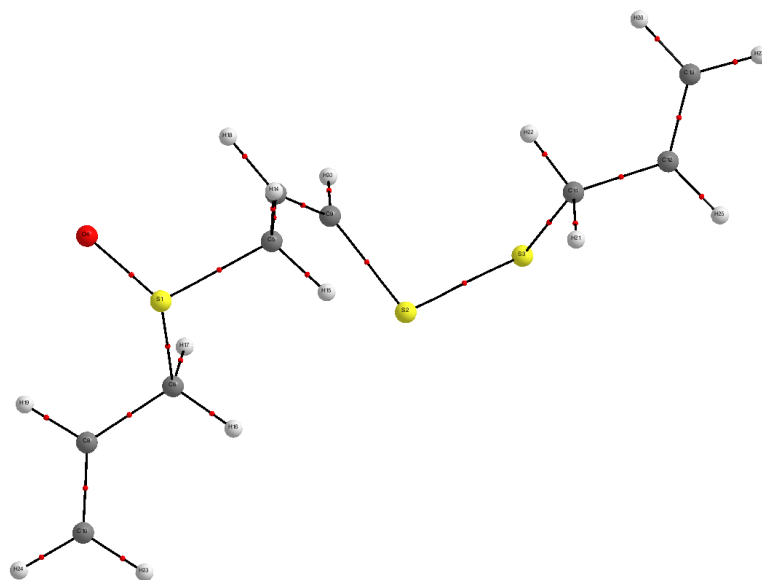

**Figure S239.** Ajoene\_(Z)\_conformer\_119

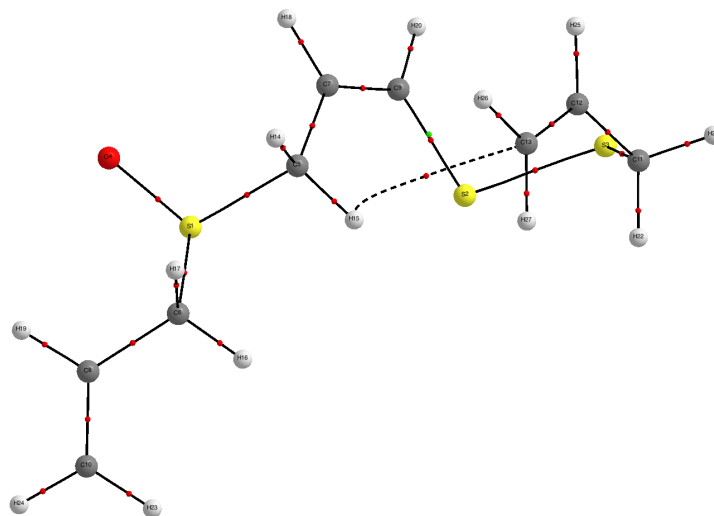

**Figure S240.** Ajoene\_(Z)\_conformer\_120

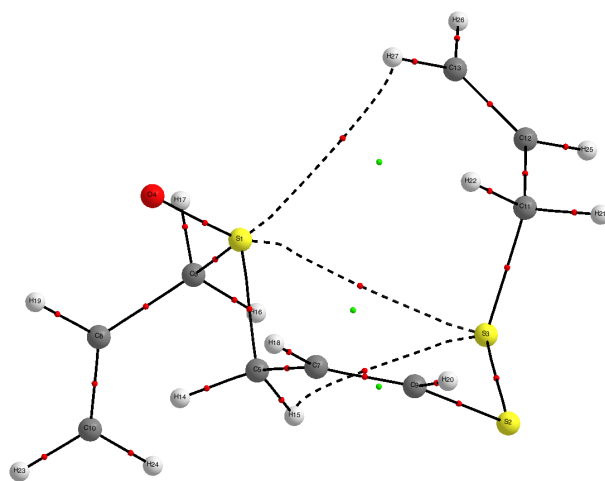

**Figure S241.** Ajoene\_(Z)\_conformer\_121

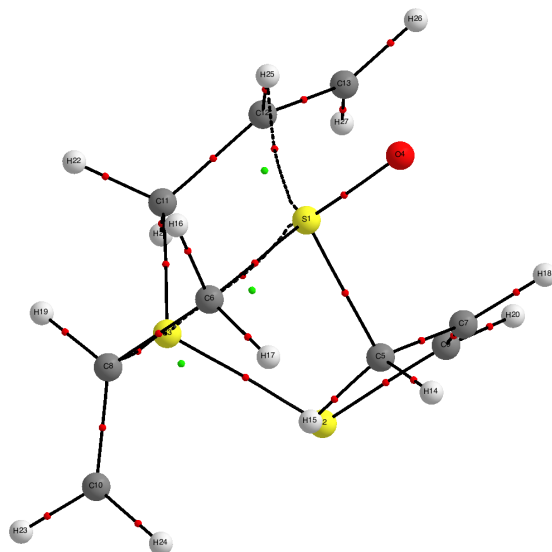

**Figure S242.** Ajoene\_(Z)\_conformer\_122

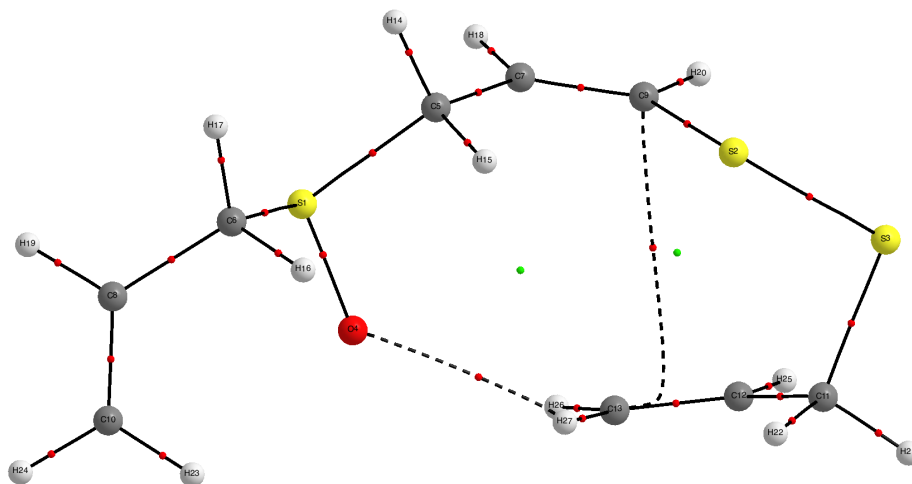

**Figure S243.** Ajoene\_(Z)\_conformer\_123



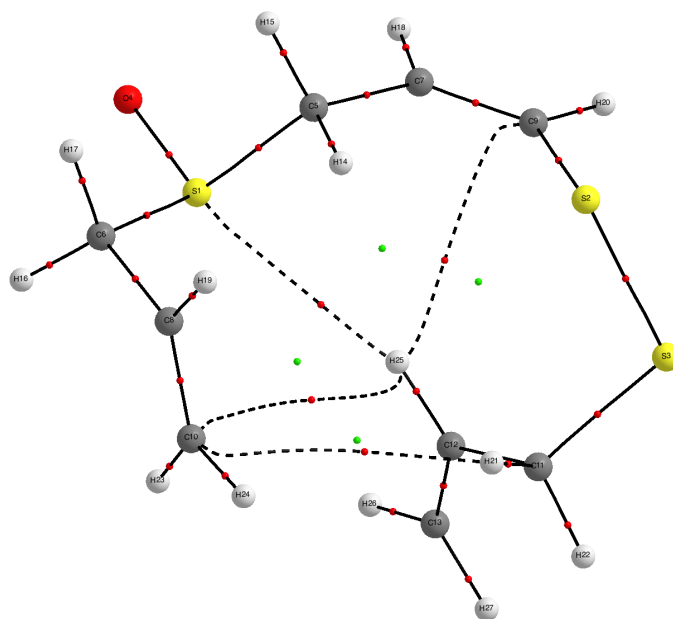

**Figure S244.** Ajoene\_(Z)\_conformer\_124

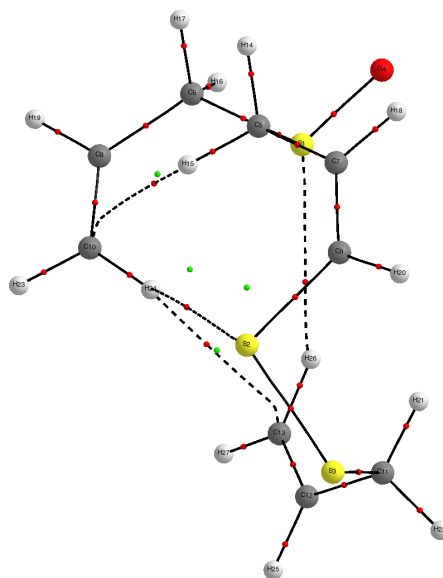

**Figure S245.** Ajoene\_(Z)\_conformer\_125

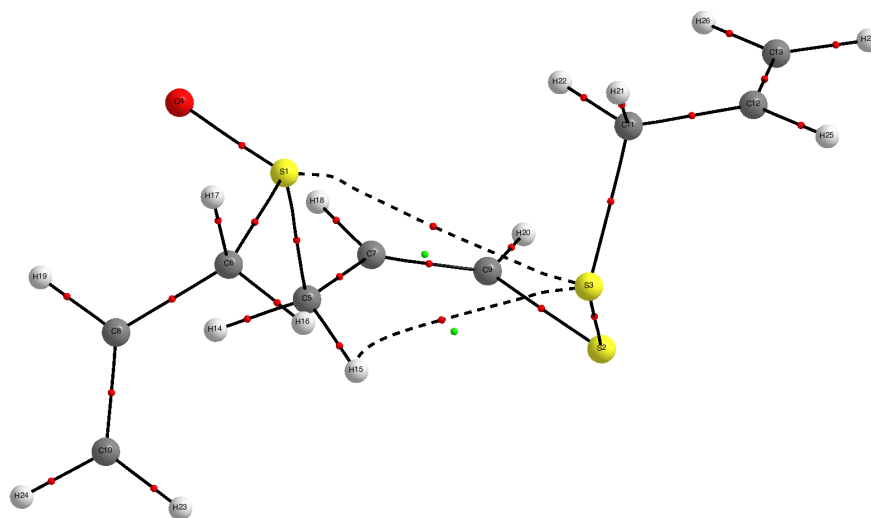

**Figure S246.** Ajoene\_(Z)\_conformer\_126

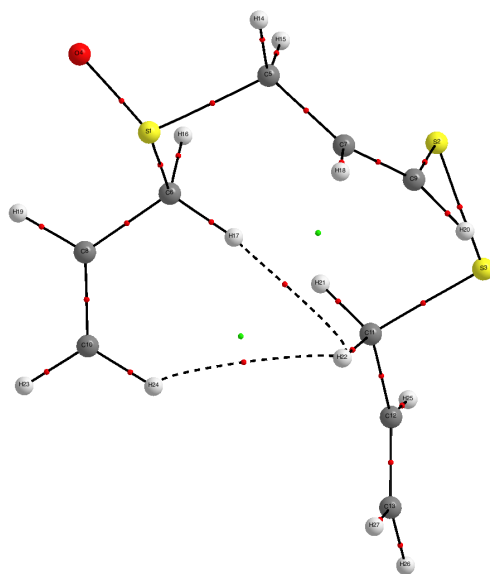

**Figure S247.** Ajoene\_(Z)\_conformer\_127

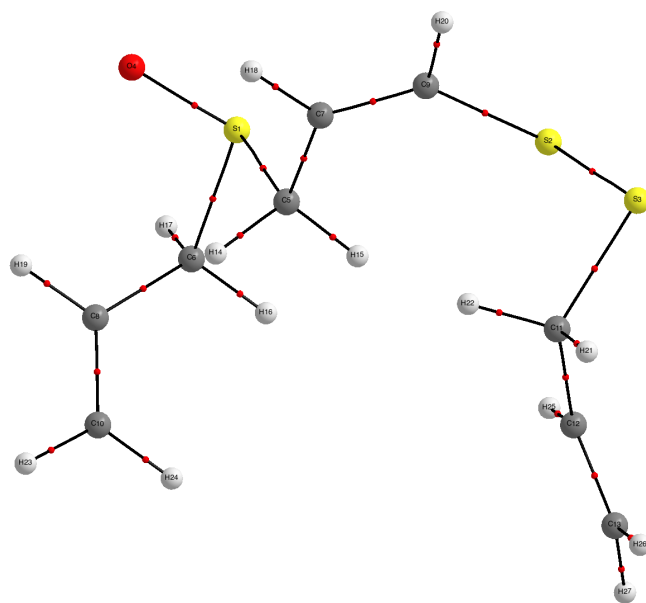

**Figure S248.** Ajoene\_(Z)\_conformer\_128

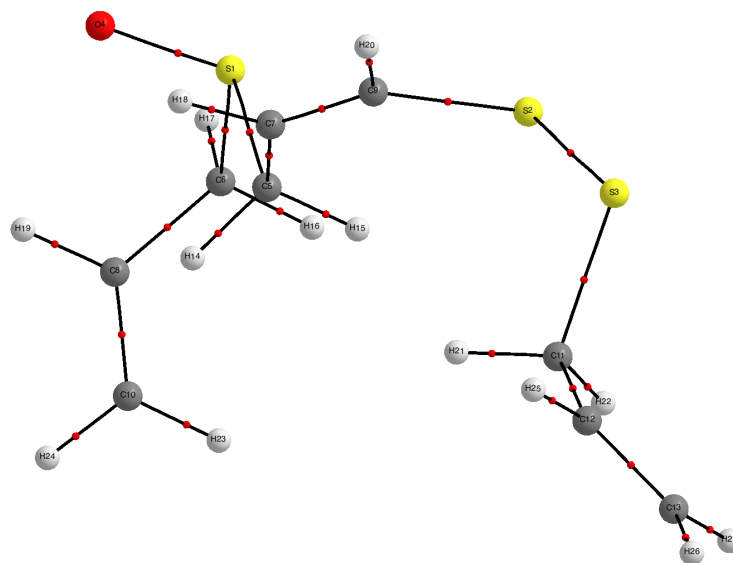

**Figure S249.** Ajoene\_(Z)\_conformer\_129

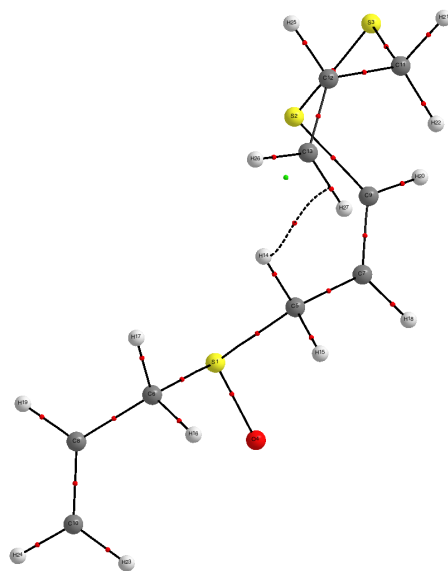

**Figure S250.** Ajoene\_(Z)\_conformer\_130

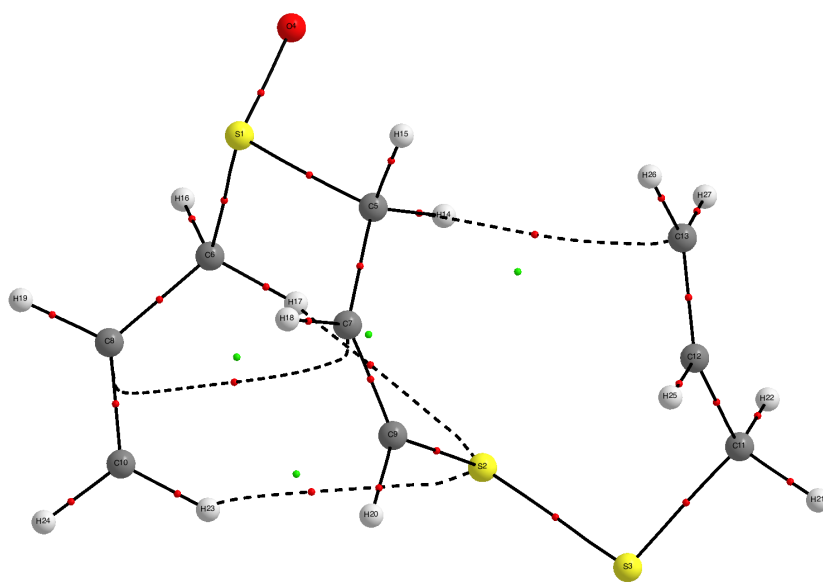

**Figure S251.** Ajoene\_(Z)\_conformer\_131

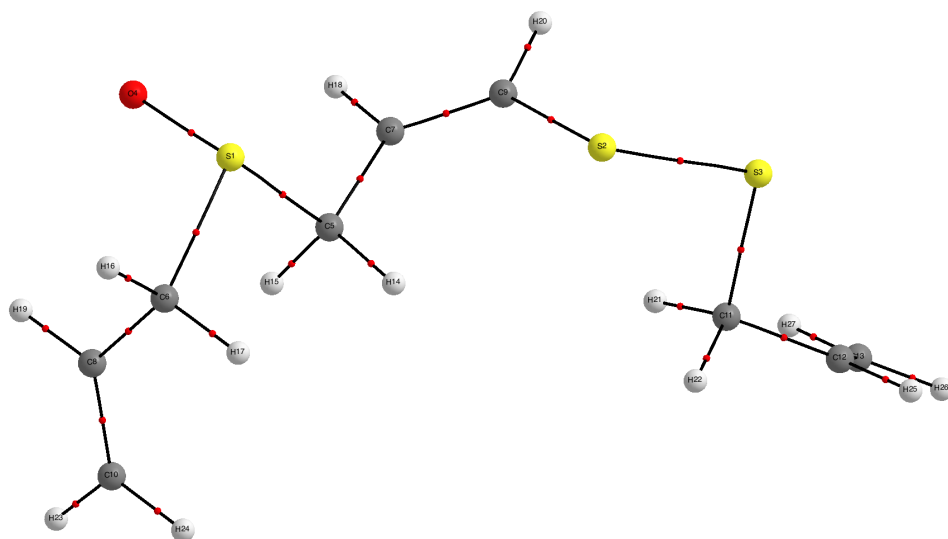

**Figure S252.** Ajoene\_(Z)\_conformer\_132

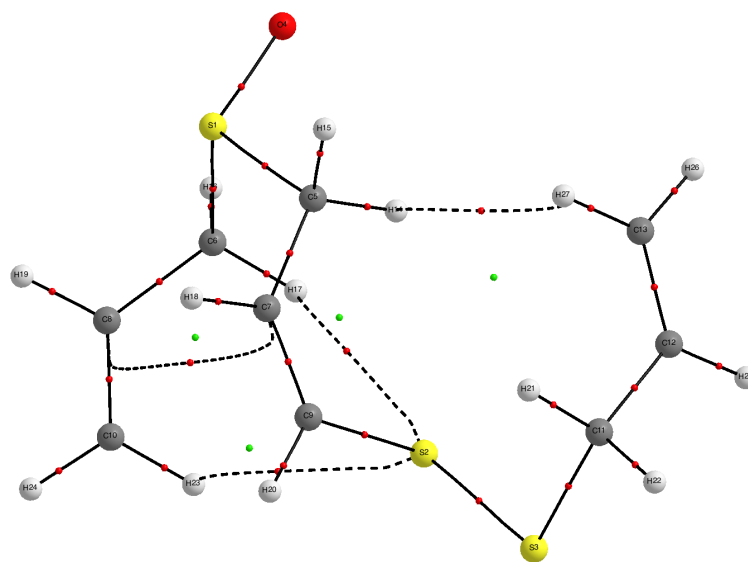

**Figure S253.** Ajoene\_(Z)\_conformer\_133

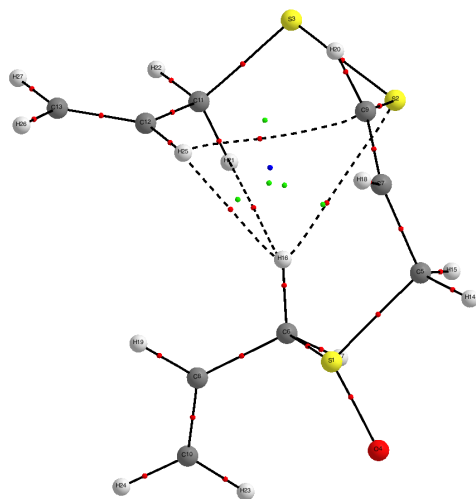

**Figure S254.** Ajoene\_(Z)\_conformer\_134

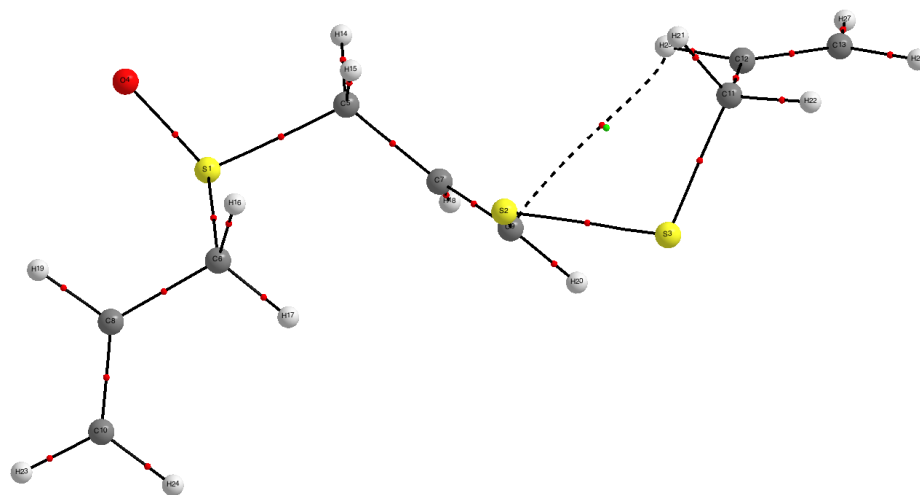

**Figure S255.** Ajoene\_(Z)\_conformer\_135

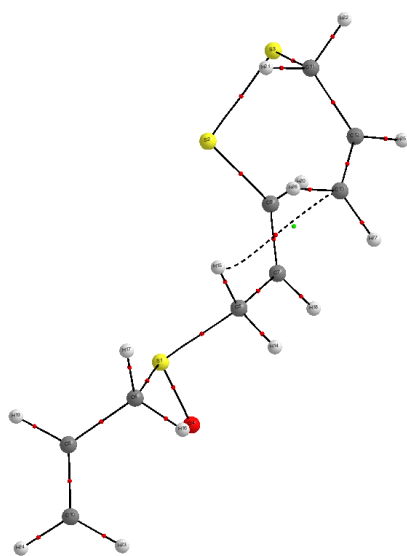

**Figure S256.** Ajoene\_(Z)\_conformer\_136

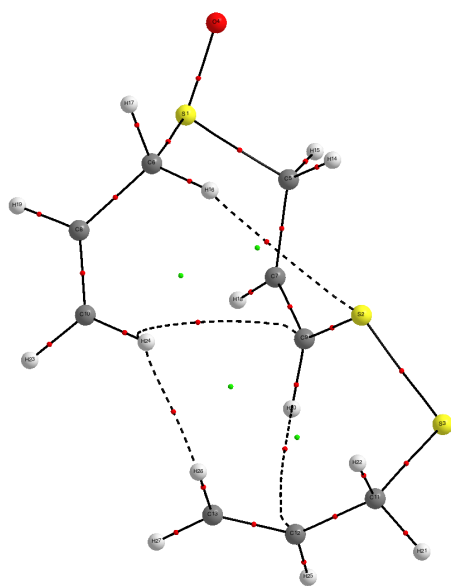

**Figure S257.** Ajoene\_(Z)\_conformer\_137

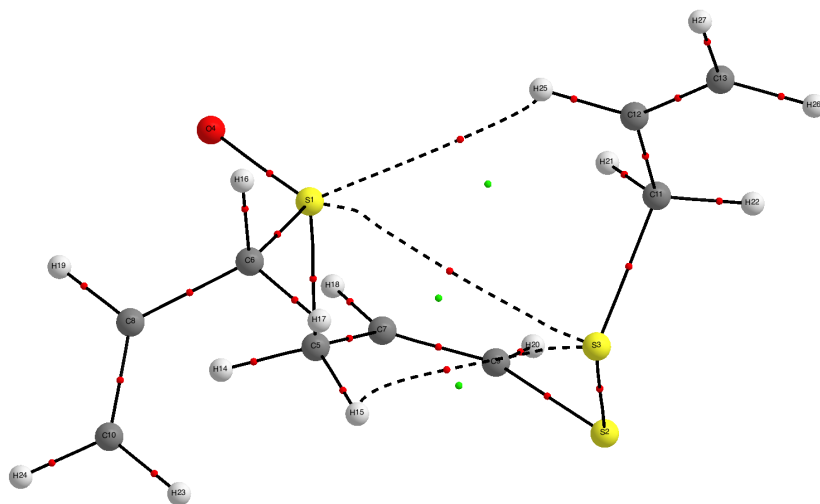

**Figure S258.** Ajoene\_(Z)\_conformer\_138

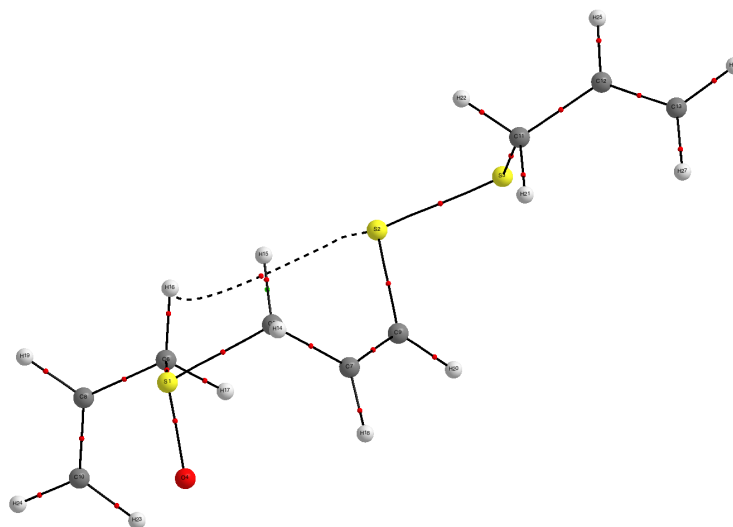

**Figure S259.** Ajoene\_(Z)\_conformer\_139



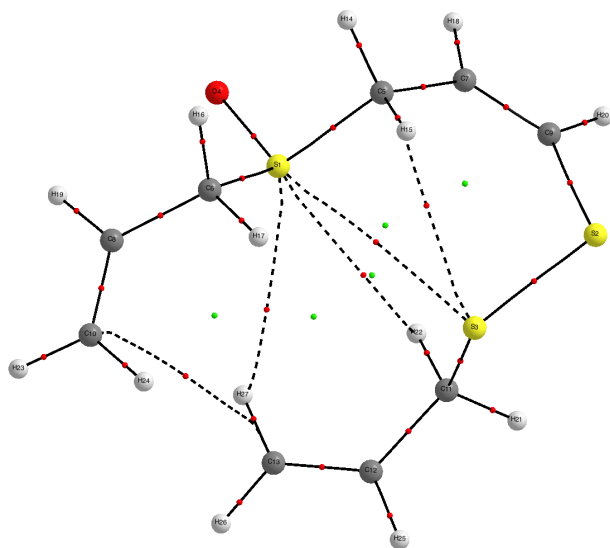

**Figure S260.** Ajoene\_(Z)\_conformer\_140

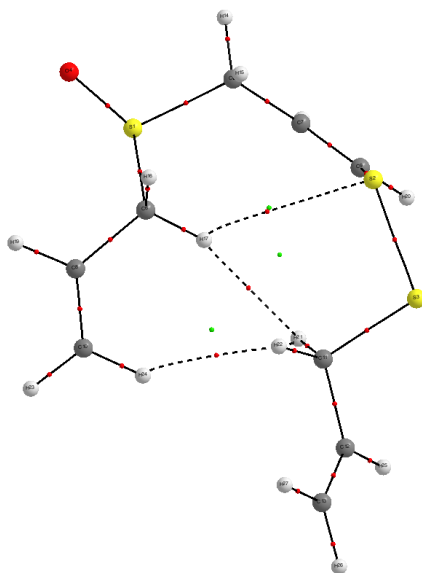

**Figure S261.** Ajoene\_(Z)\_conformer\_141

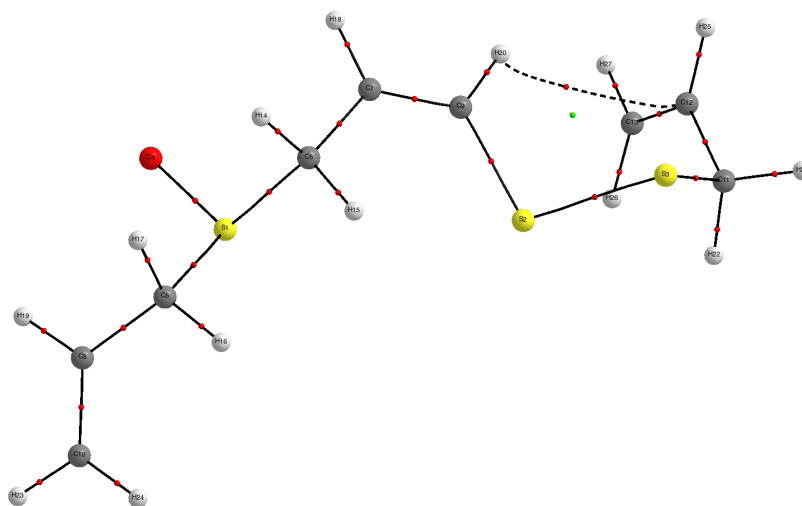

**Figure S262.** Ajoene\_(Z)\_conformer\_142

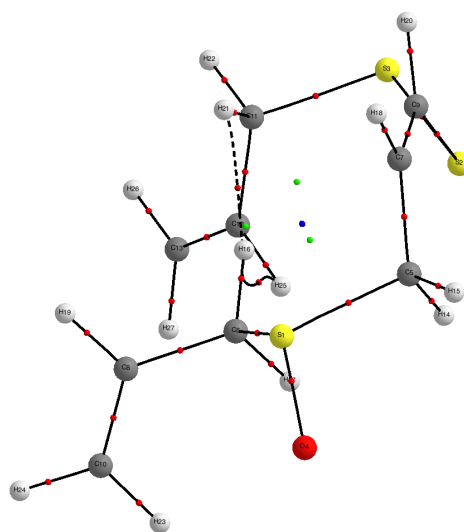

**Figure S263.** Ajoene\_(Z)\_conformer\_143

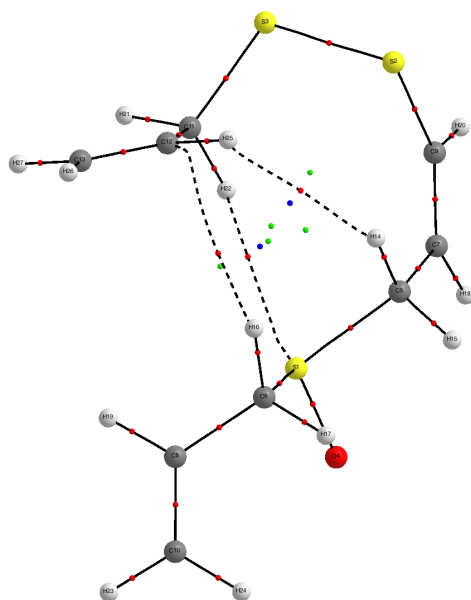

**Figure S264.** Ajoene\_(Z)\_conformer\_144

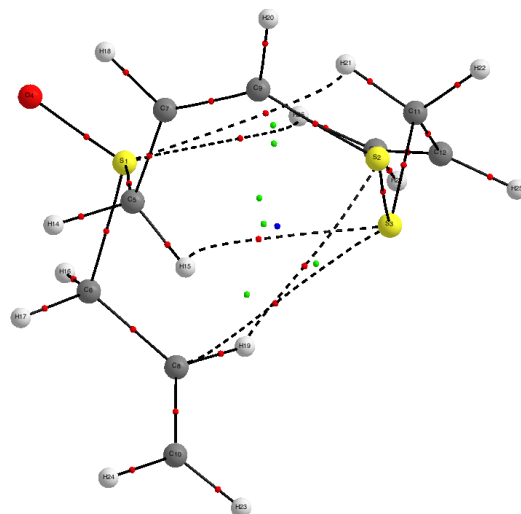

**Figure S265.** Ajoene\_(Z)\_conformer\_145

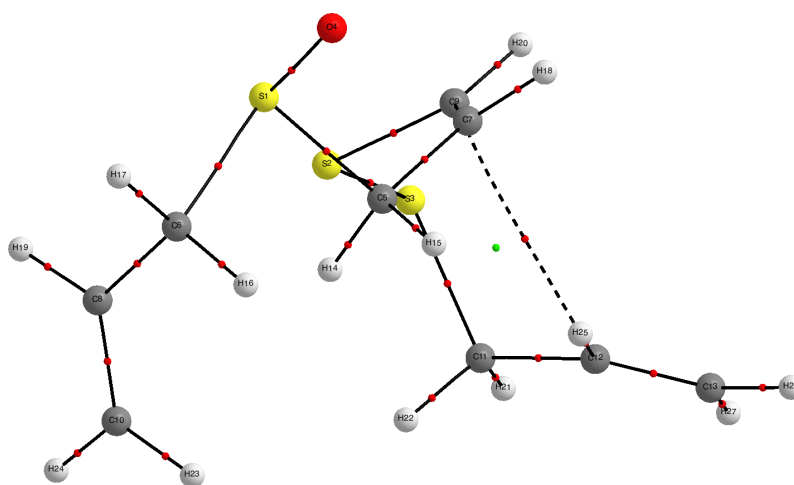

**Figure S266.** Ajoene\_(Z)\_conformer\_146

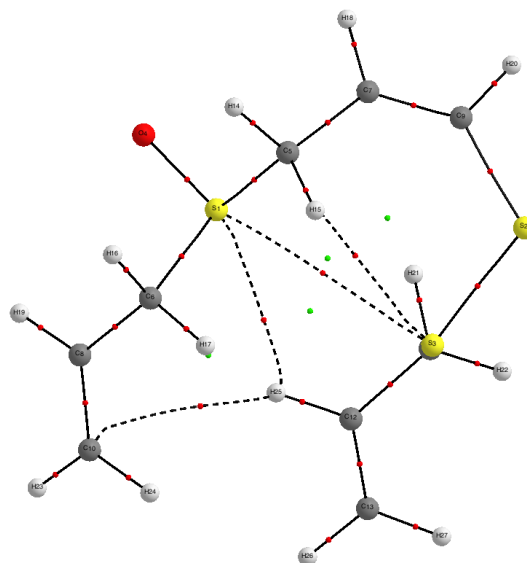

**Figure S267.** Ajoene\_(Z)\_conformer\_147

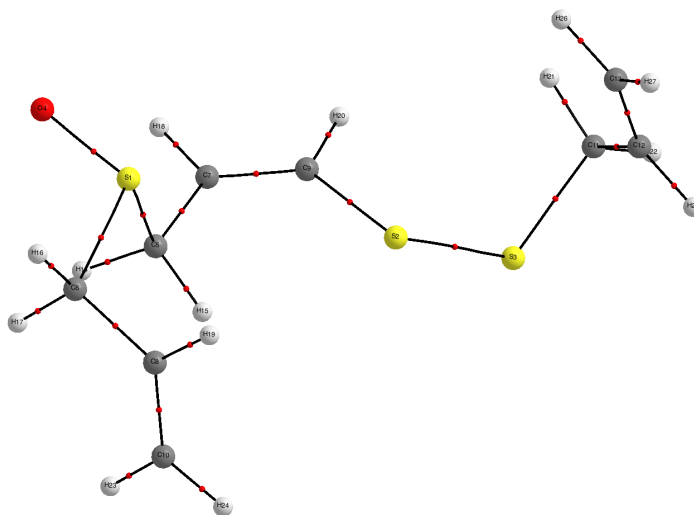

**Figure S268.** Ajoene\_(Z)\_conformer\_148

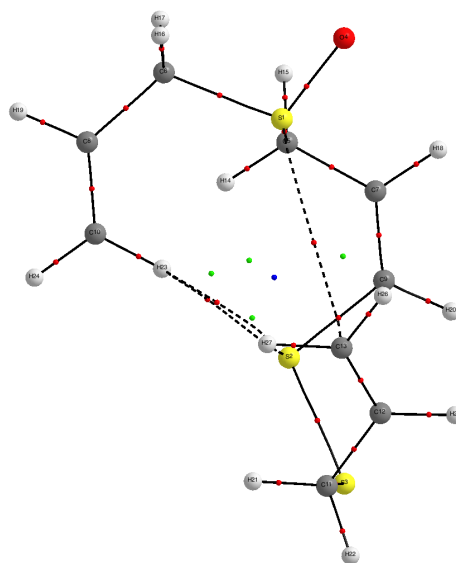

**Figure S269.** Ajoene\_(Z)\_conformer\_149

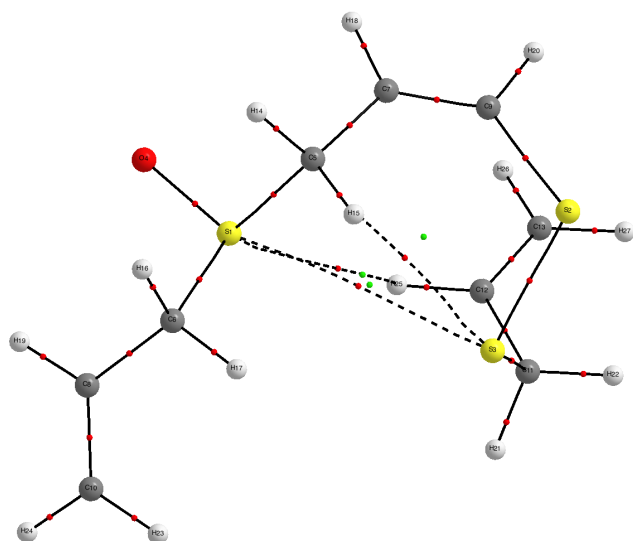

**Figure S270.** Ajoene\_(Z)\_conformer\_150

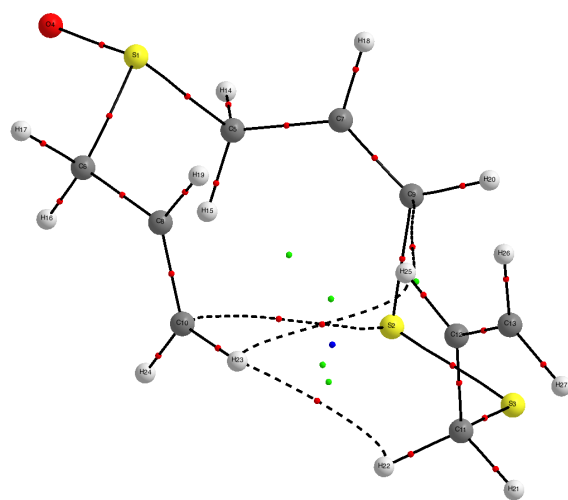

**Figure S271.** Ajoene\_(Z)\_conformer\_151

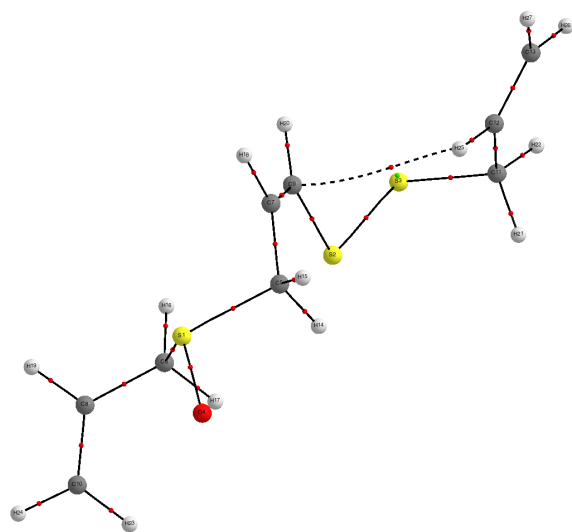

**Figure S272.** Ajoene\_(Z)\_conformer\_152

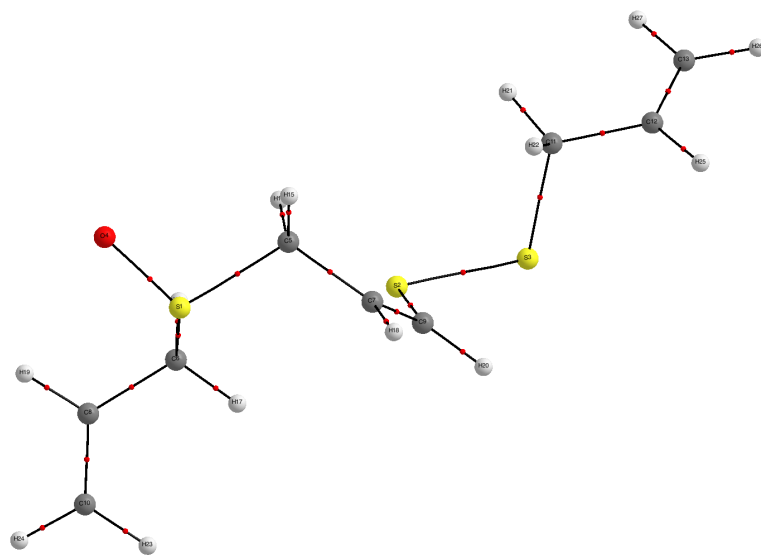

**Figure S273.** Ajoene\_(Z)\_conformer\_153

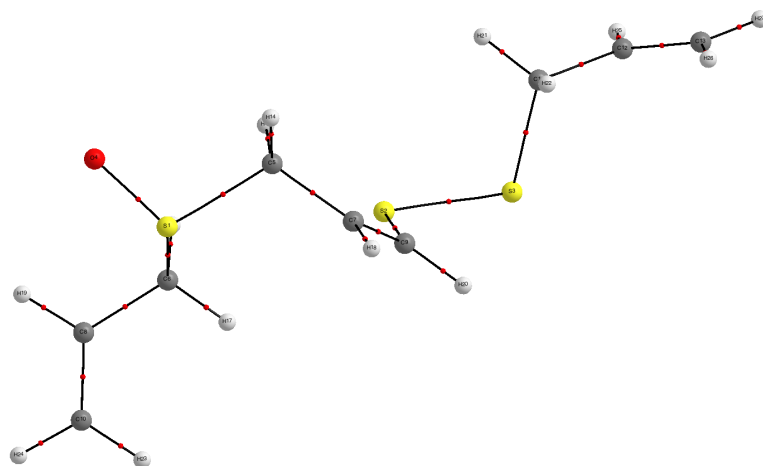

**Figure S274.** Ajoene\_(Z)\_conformer\_154

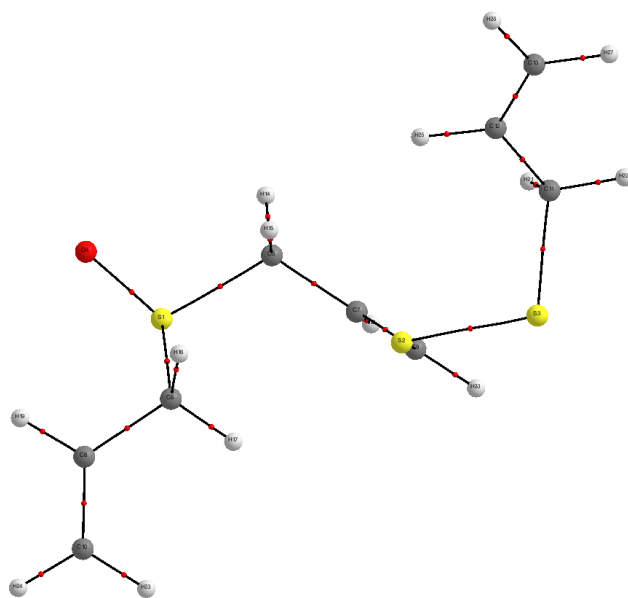

**Figure S275.** Ajoene\_(Z)\_conformer\_155



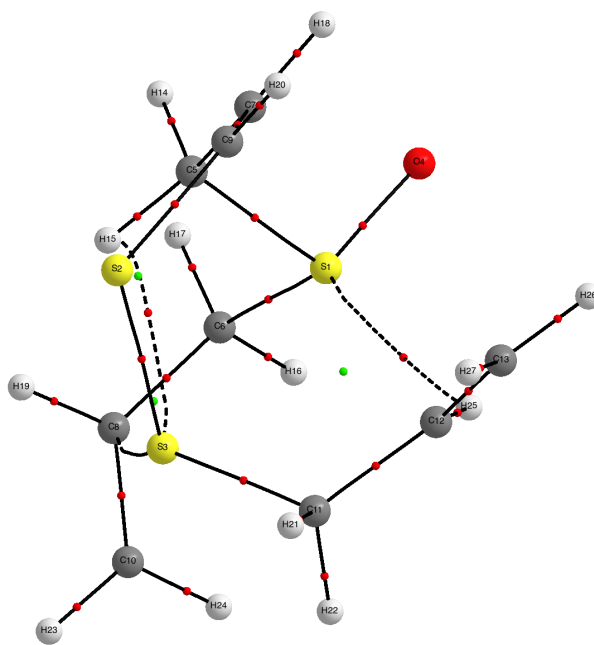

**Figure S276.** Ajoene\_(Z)\_conformer\_156

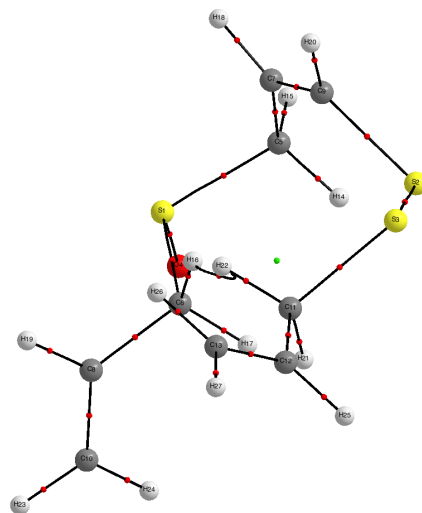

**Figure S277.** Ajoene\_(Z)\_conformer\_157

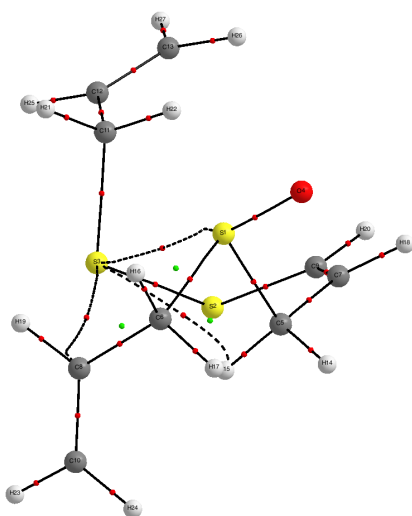

**Figure S278.** Ajoene\_(Z)\_conformer\_158

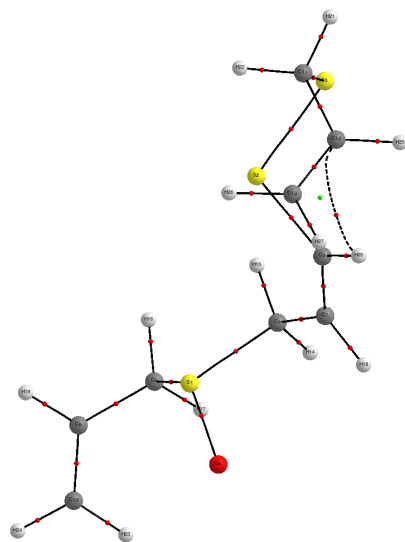

**Figure S279.** Ajoene\_(Z)\_conformer\_159

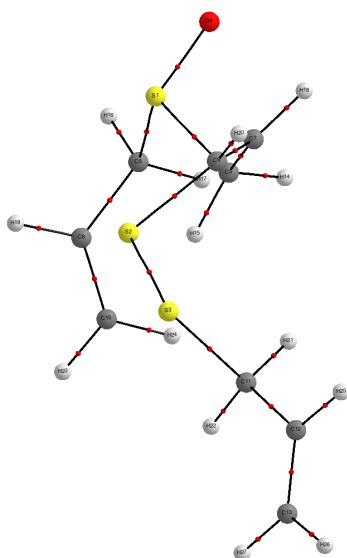

**Figure S280.** Ajoene\_(Z)\_conformer\_160

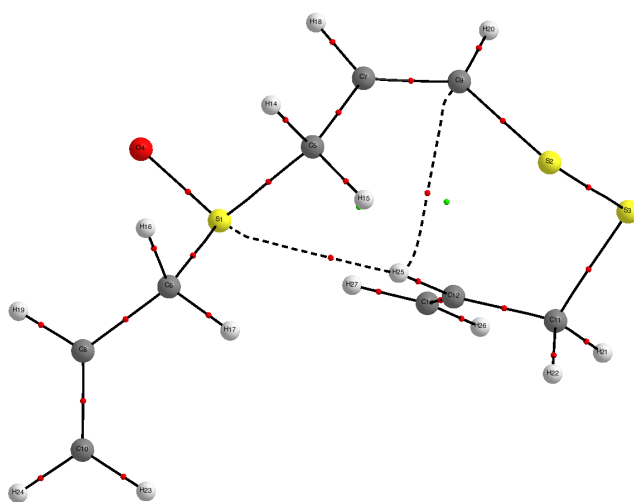

**Figure S281.** Ajoene\_(Z)\_conformer\_161

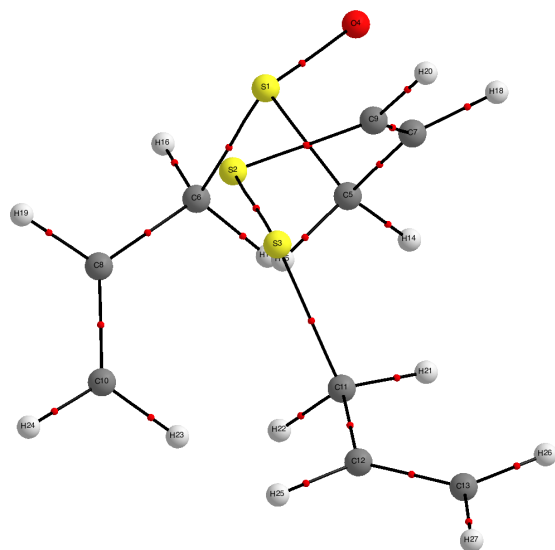

**Figure S282.** Ajoene\_(Z)\_conformer\_162

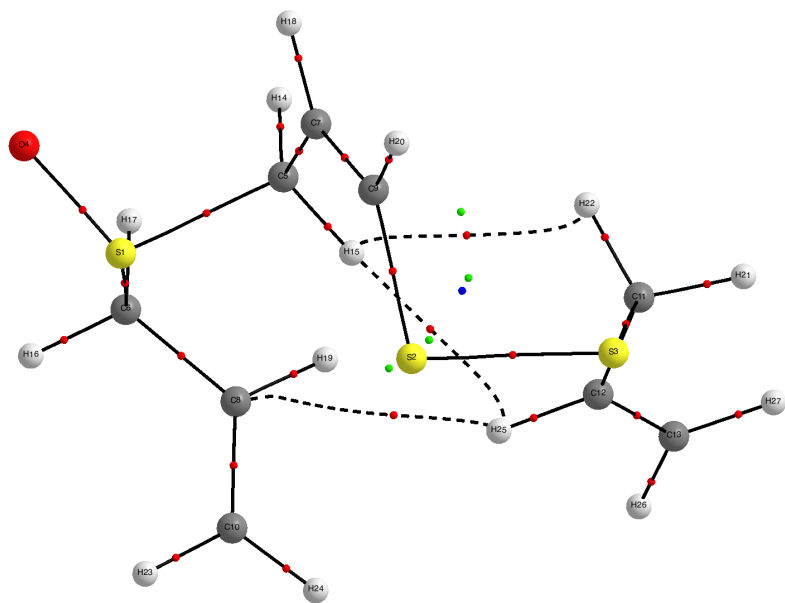

**Figure S283.** Ajoene\_(Z)\_conformer\_163

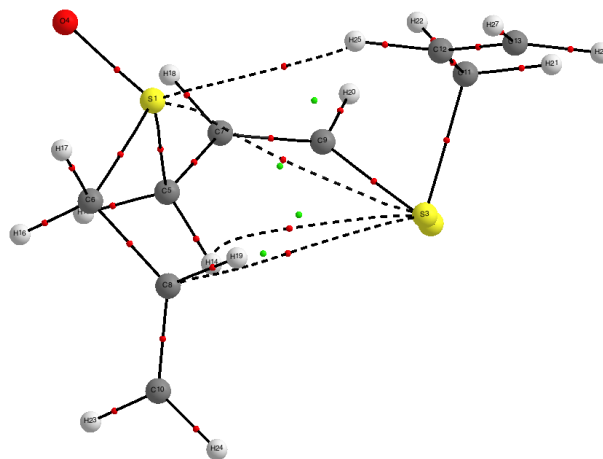

**Figure S284.** Ajoene\_(Z)\_conformer\_164

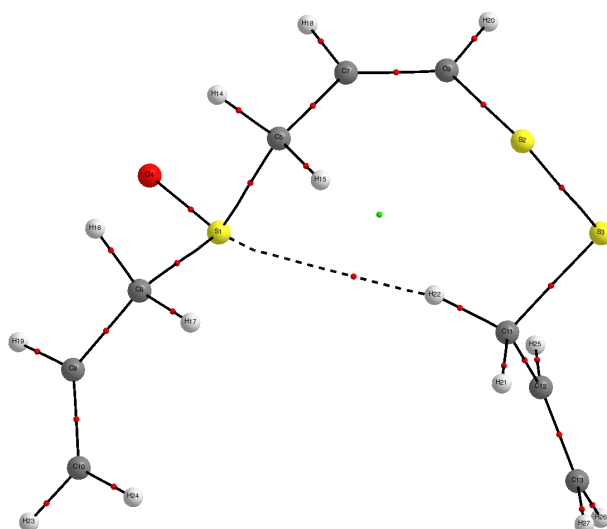

**Figure S285.** Ajoene\_(Z)\_conformer\_165

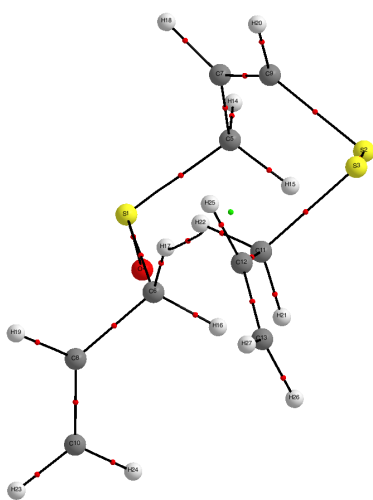

**Figure S286.** Ajoene\_(Z)\_conformer\_166

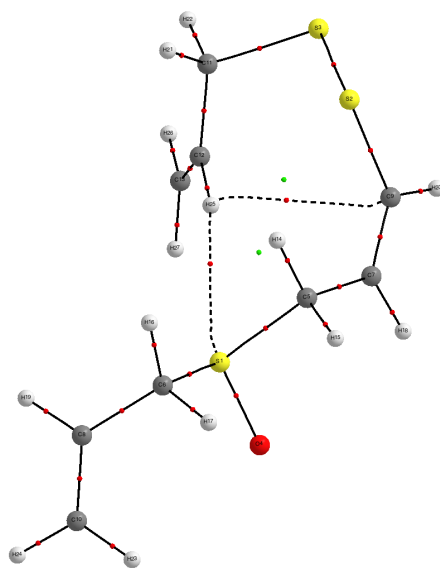

**Figure S287.** Ajoene\_(Z)\_conformer\_167

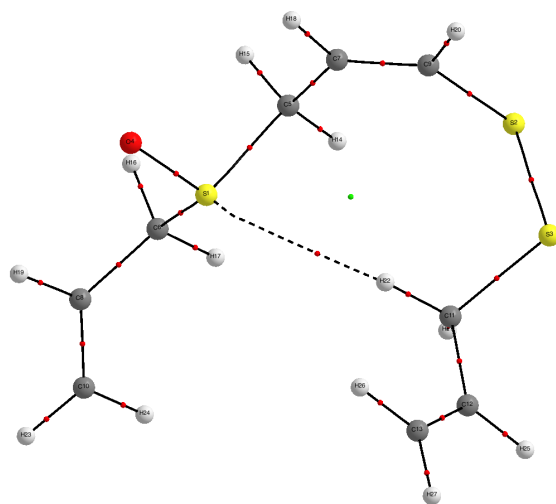

**Figure S288.** Ajoene\_(Z)\_conformer\_168

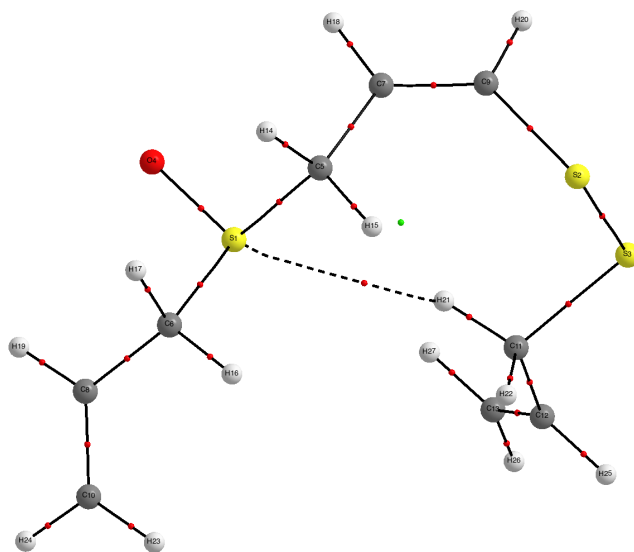

**Figure S289.** Ajoene\_(Z)\_conformer\_169

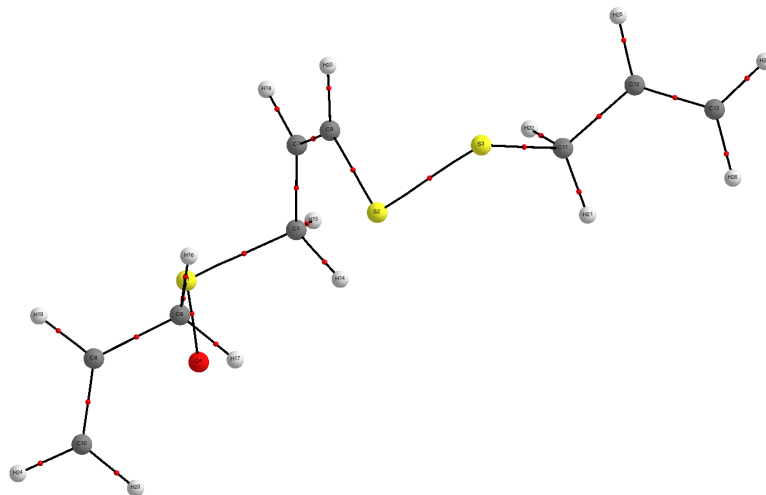

**Figure S290.** Ajoene\_(Z)\_conformer\_170

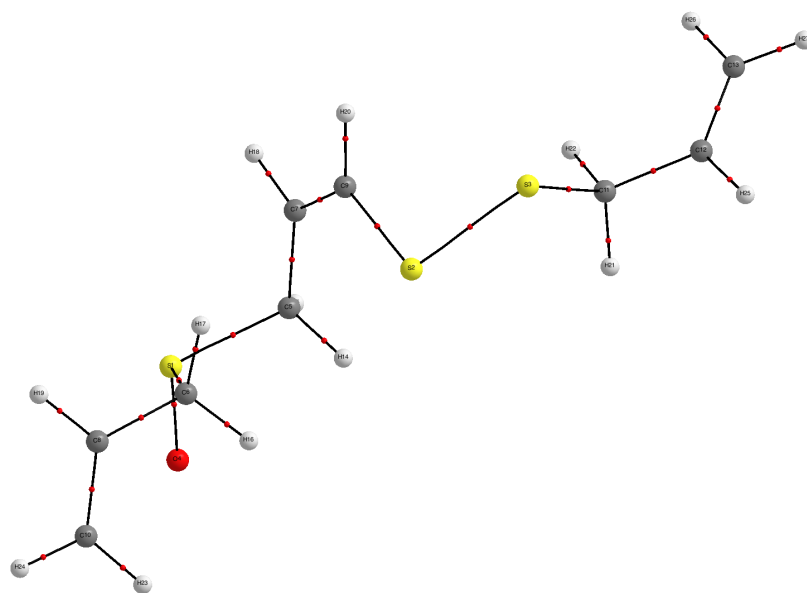

**Figure S291.** Ajoene\_(Z)\_conformer\_171



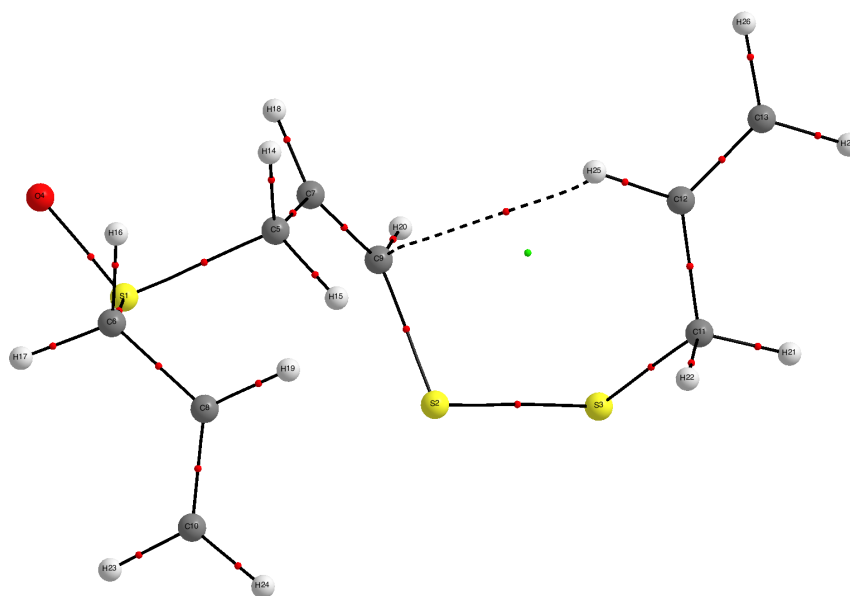

Figure S292. Ajoene\_(Z)\_conformer\_172

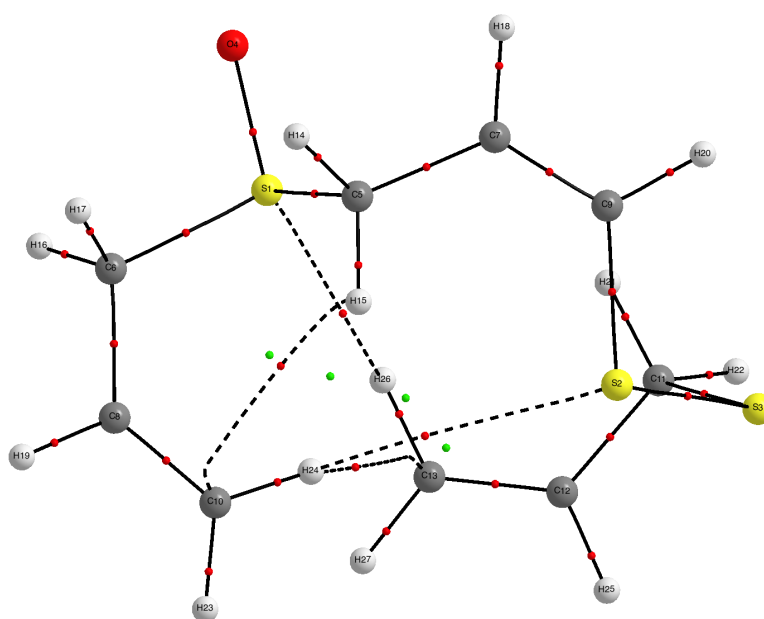

Figure S293. Ajoene\_(Z)\_conformer\_173

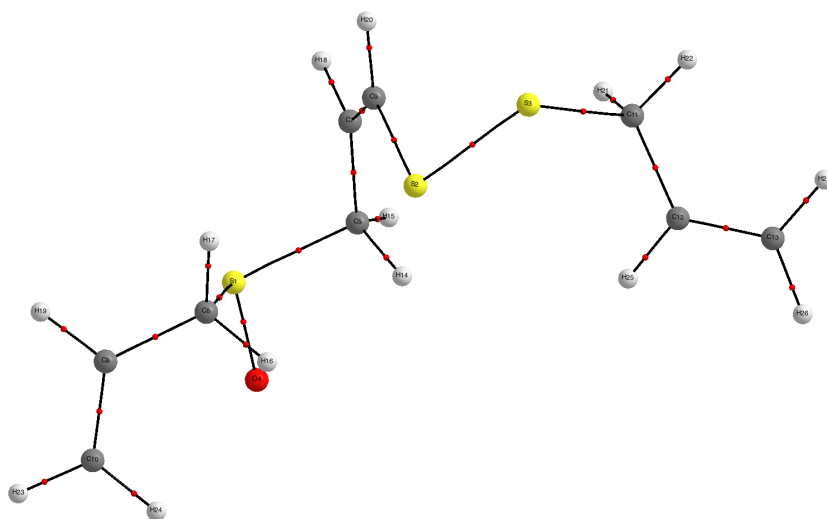

**Figure S294.** Ajoene\_(Z)\_conformer\_174

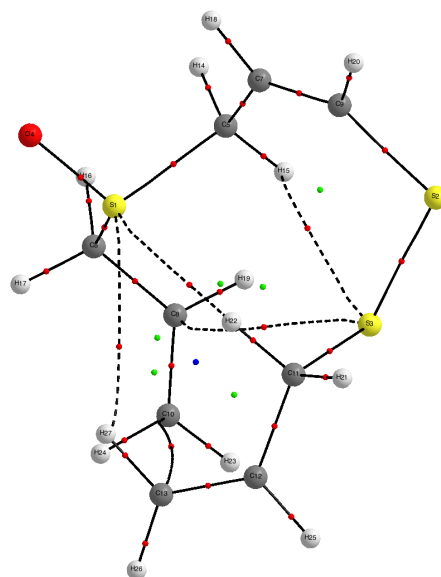

**Figure S295.** Ajoene\_(Z)\_conformer\_175

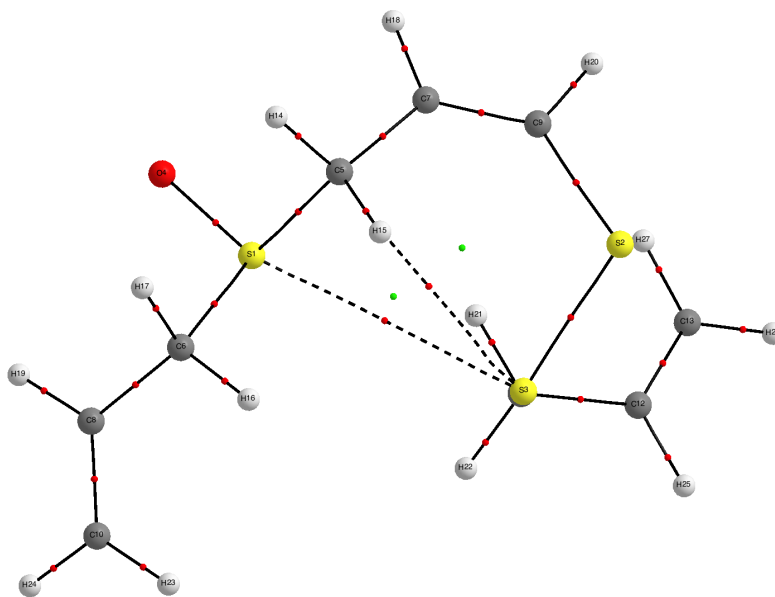

**Figure S296.** Ajoene\_(Z)\_conformer\_176

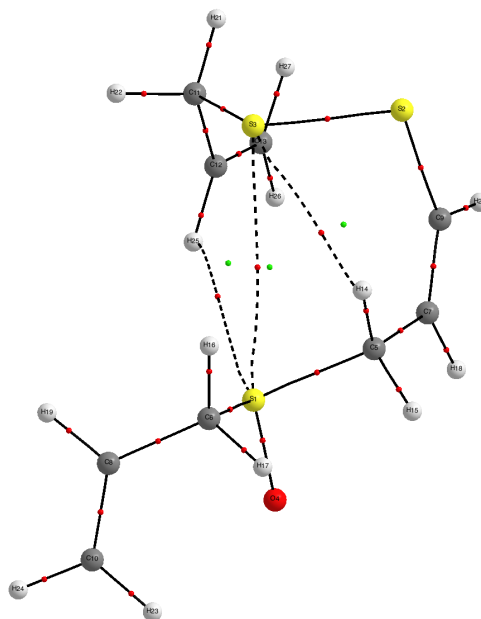

**Figure S297.** Ajoene\_(Z)\_conformer\_177

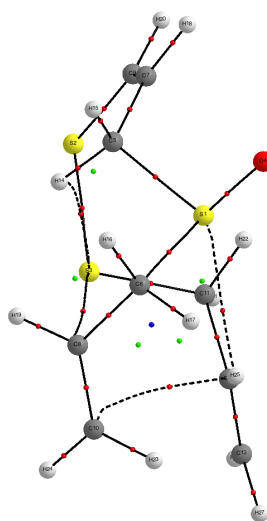

**Figure S298.** Ajoene\_(Z)\_conformer\_178

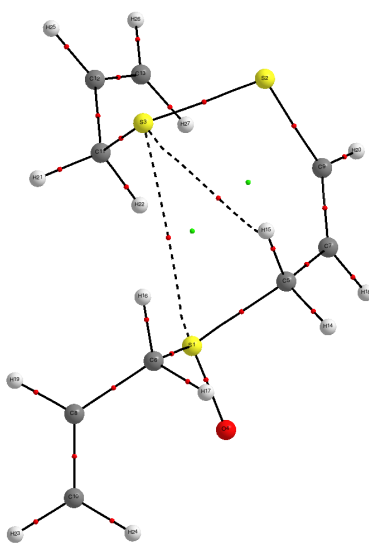

**Figure S299.** Ajoene\_(Z)\_conformer\_179

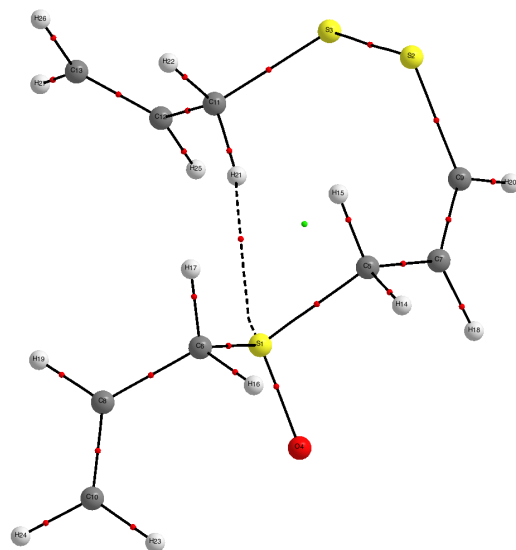

**Figure S300.** Ajoene\_(Z)\_conformer\_180

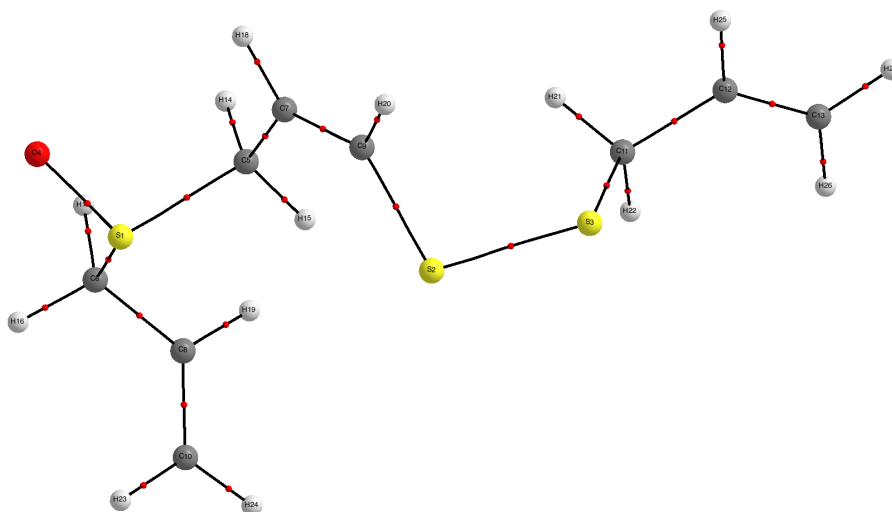

**Figure S301.** Ajoene\_(Z)\_conformer\_181

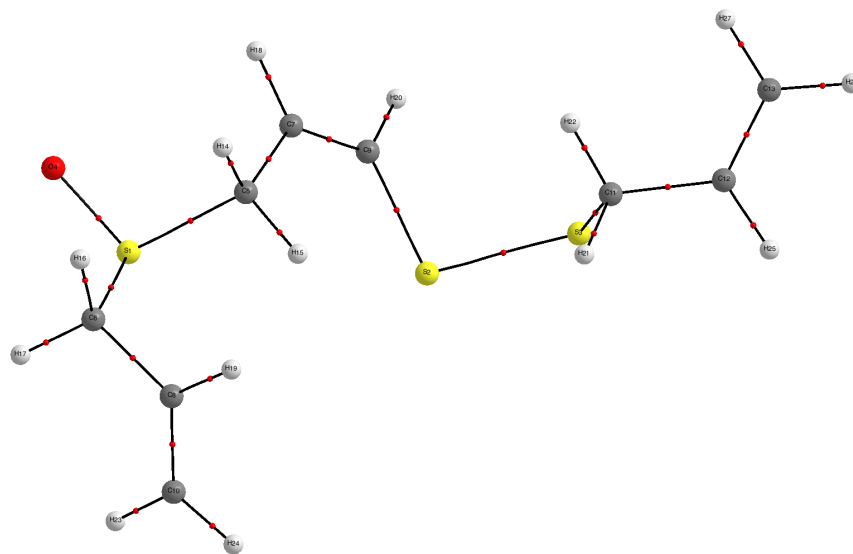

**Figure S302.** Ajoene\_(Z)\_conformer\_182

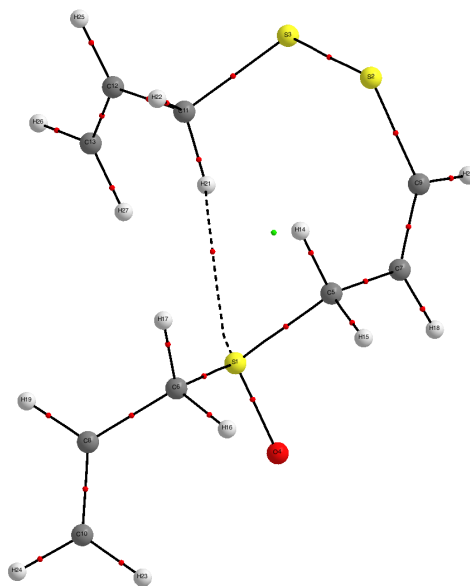

**Figure S303.** Ajoene\_(Z)\_conformer\_183

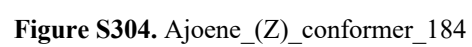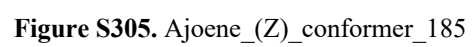

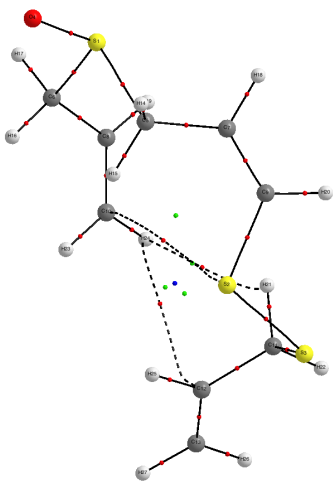

**Figure S306.** Ajoene\_(Z)\_conformer\_186

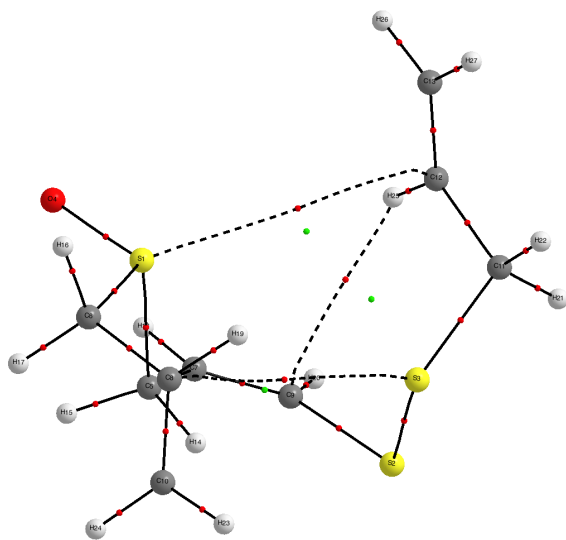

**Figure S307.** Ajoene\_(Z)\_conformer\_187



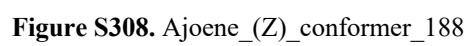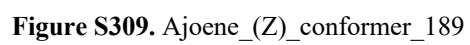

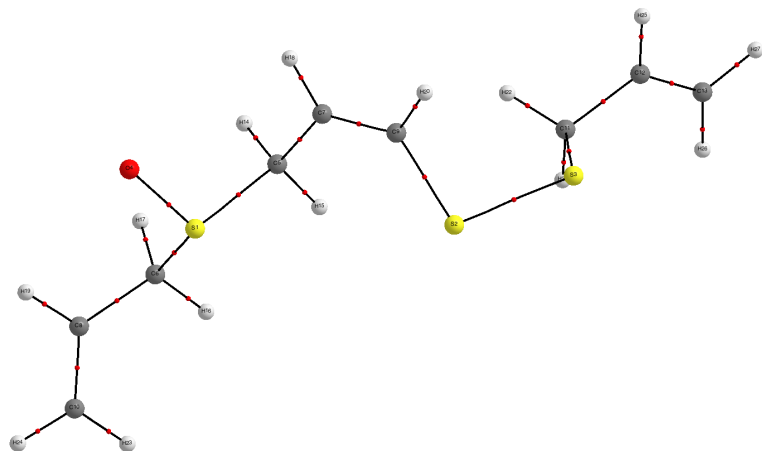

**Figure S310.** Ajoene\_(Z)\_conformer\_190

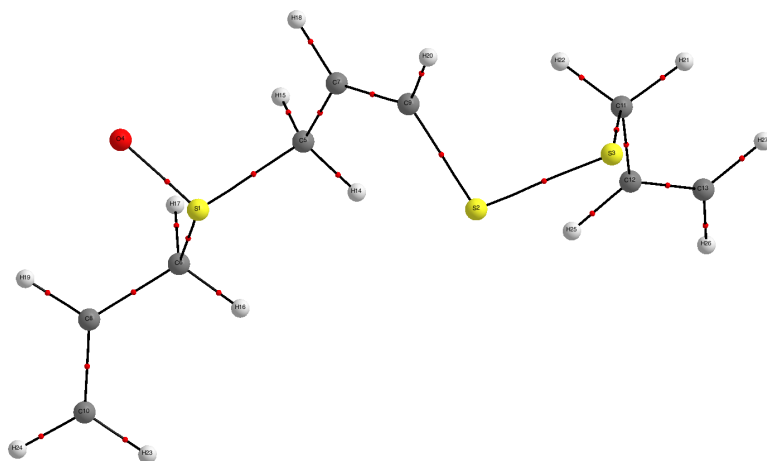

**Figure S311.** Ajoene\_(Z)\_conformer\_191

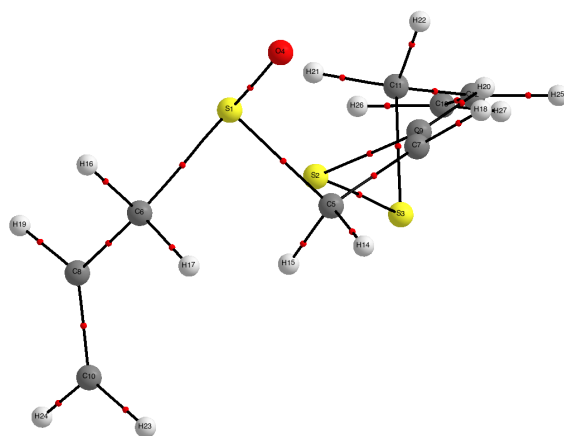

**Figure S312.** Ajoene\_(Z)\_conformer\_192

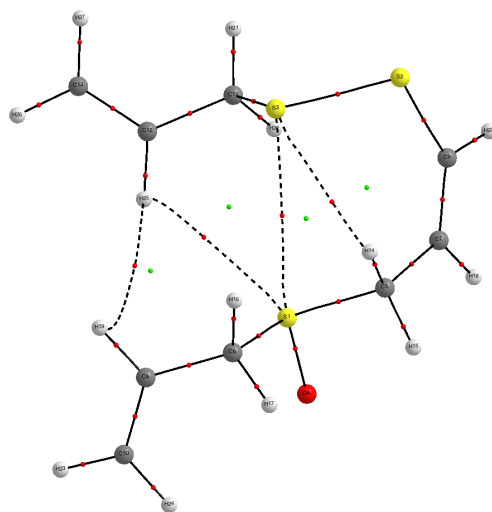

**Figure S313.** Ajoene\_(Z)\_conformer\_193

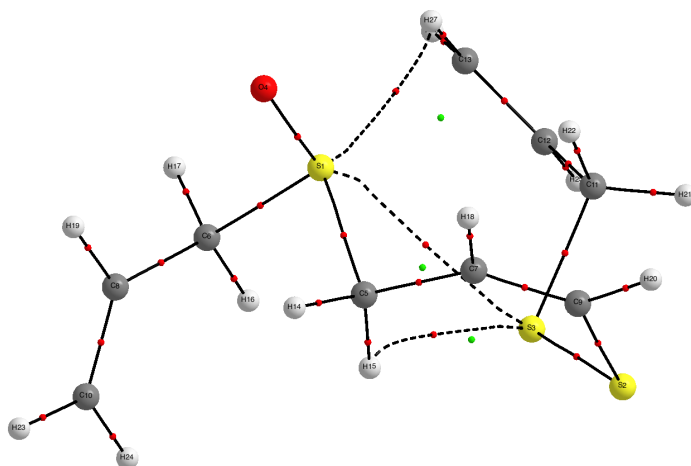

**Figure S314.** Ajoene\_(Z)\_conformer\_194

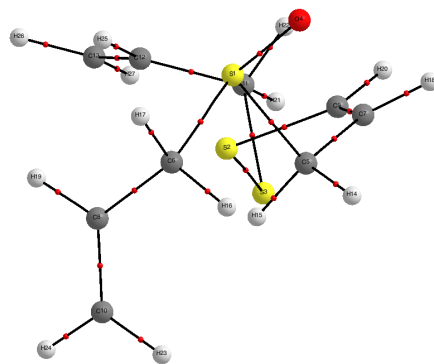

**Figure S315.** Ajoene\_(Z)\_conformer\_195

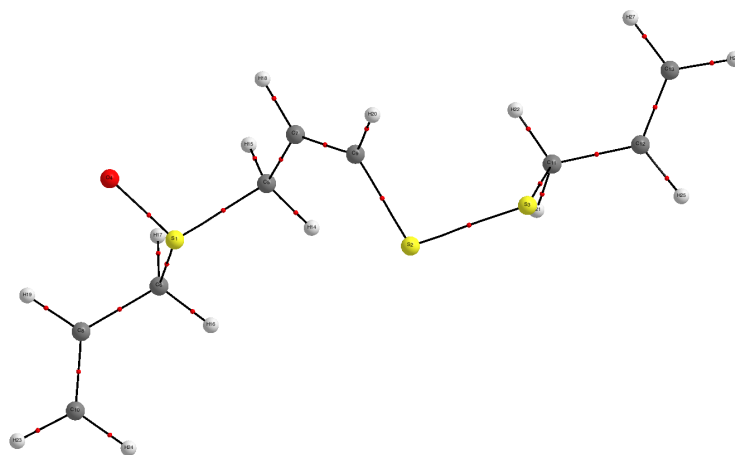

**Figure S316.** Ajoene\_(Z)\_conformer\_196

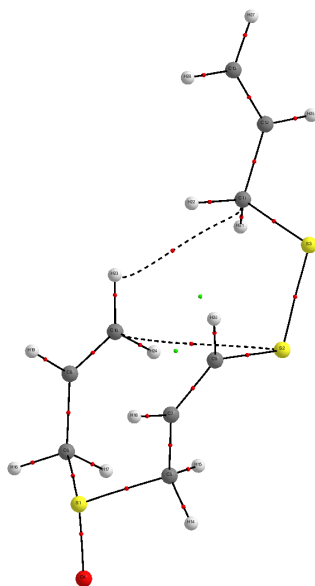

**Figure S317.** Ajoene\_(Z)\_conformer\_197

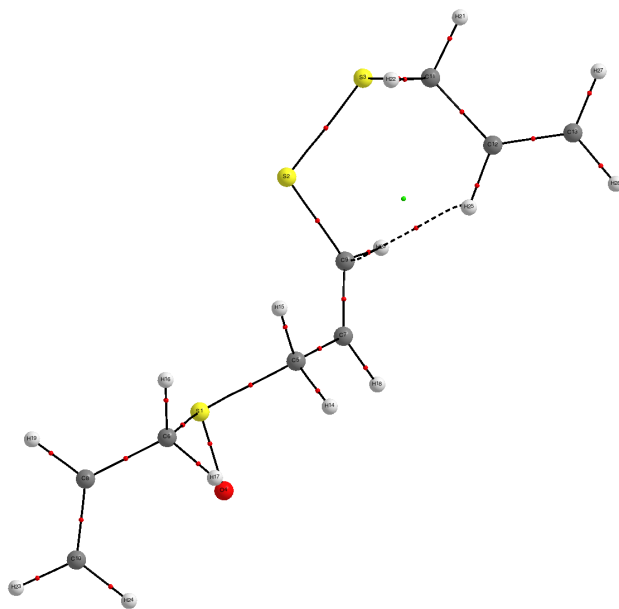

**Figure S318.** Ajoene\_(Z)\_conformer\_198

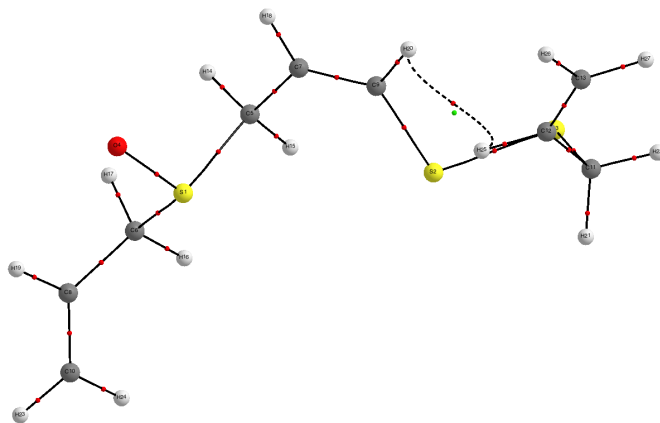

**Figure S319.** Ajoene\_(Z)\_conformer\_199

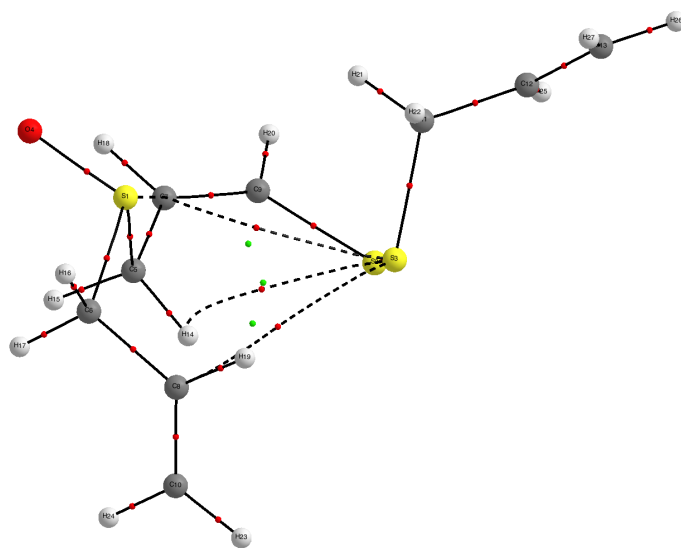

**Figure S320.** Ajoene\_(Z)\_conformer\_200

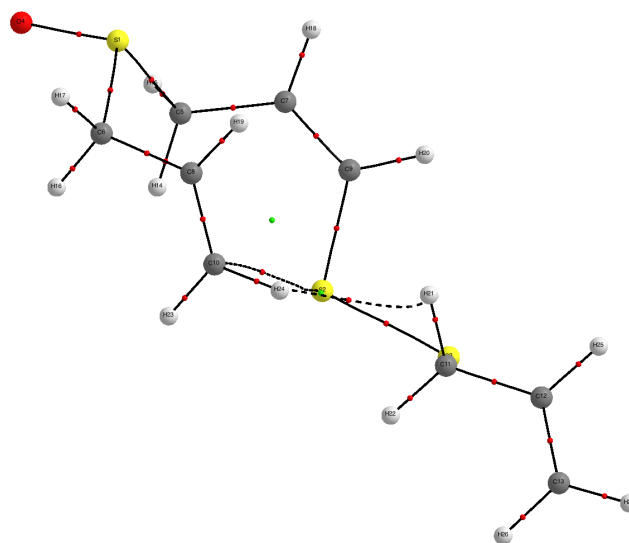

**Figure S321.** Ajoene\_(Z)\_conformer\_201

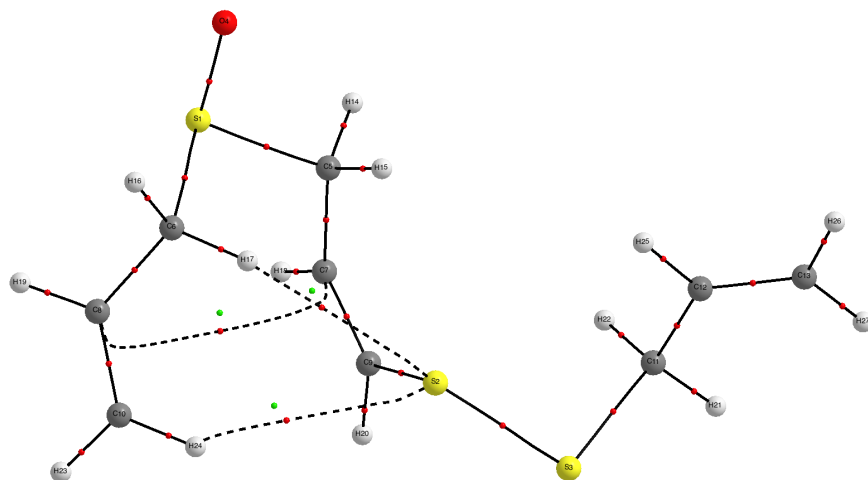

**Figure S322.** Ajoene\_(Z)\_conformer\_202

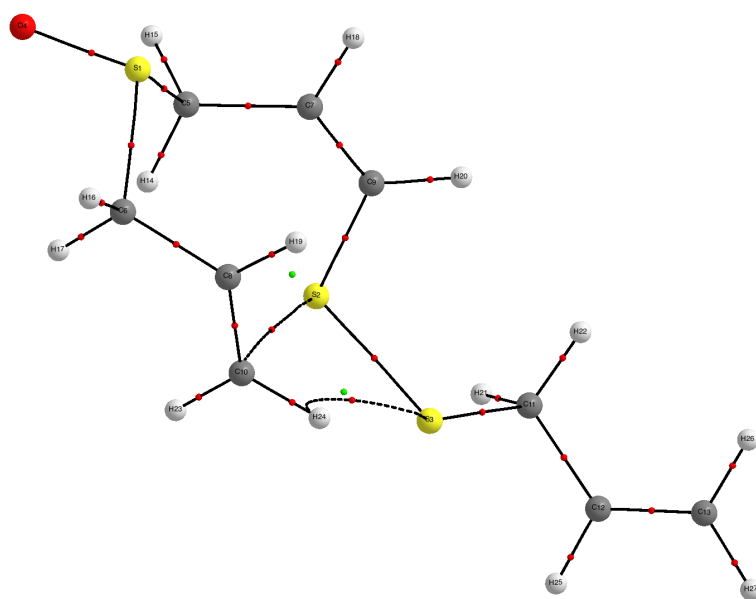

**Figure S323.** Ajoene\_(Z)\_conformer\_203



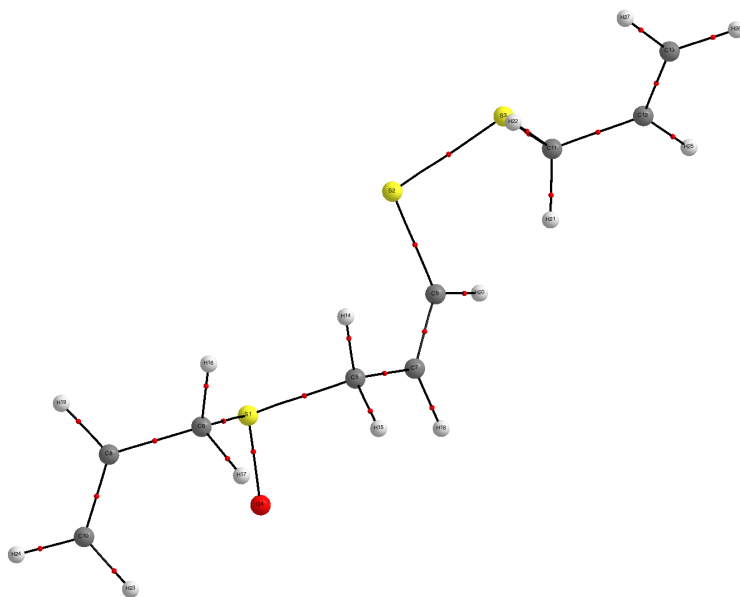

**Figure S324.** Ajoene\_(Z)\_conformer\_204

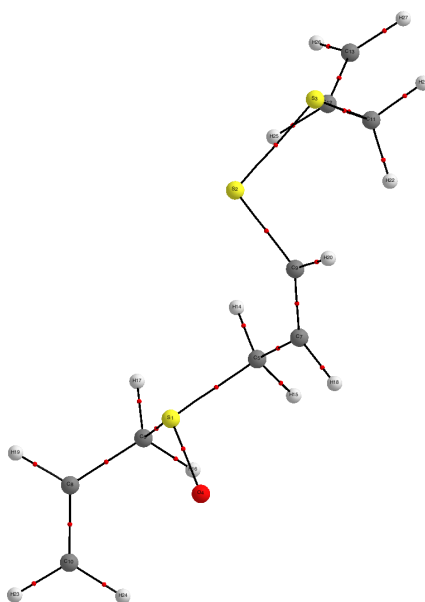

**Figure S325.** Ajoene\_(Z)\_conformer\_205

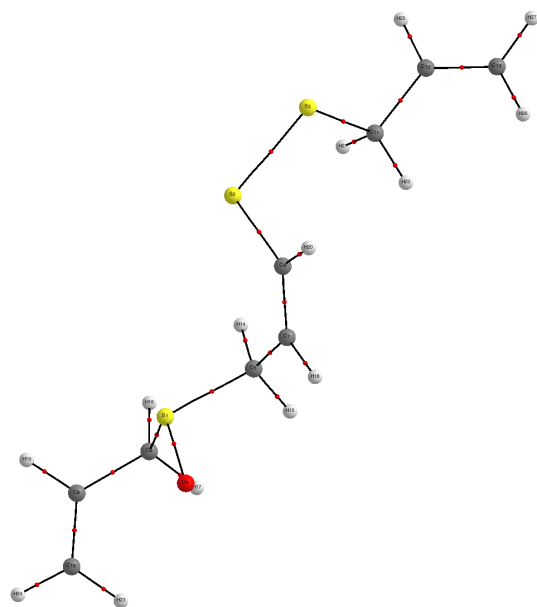

**Figure S326.** Ajoene\_(Z)\_conformer\_206

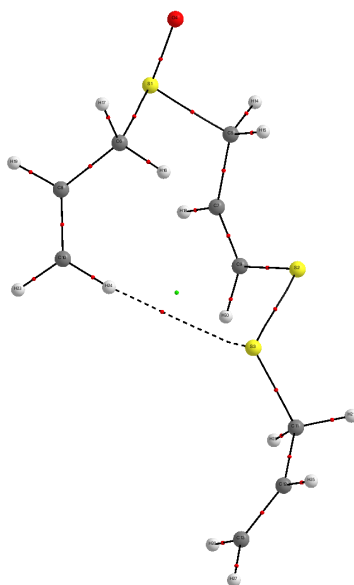

**Figure S327.** Ajoene\_(Z)\_conformer\_207

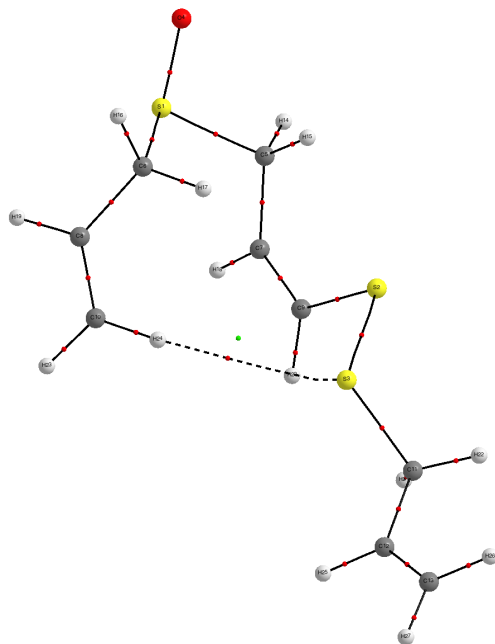

**Figure S328.** Ajoene\_(Z)\_conformer\_208

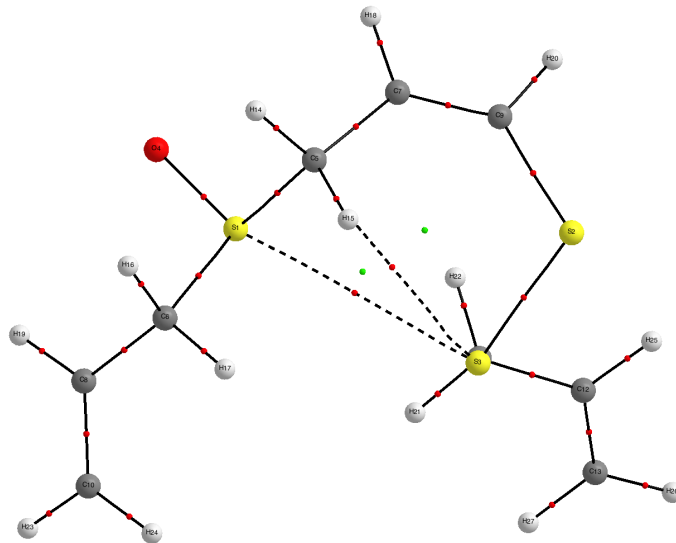

**Figure S329.** Ajoene\_(Z)\_conformer\_209

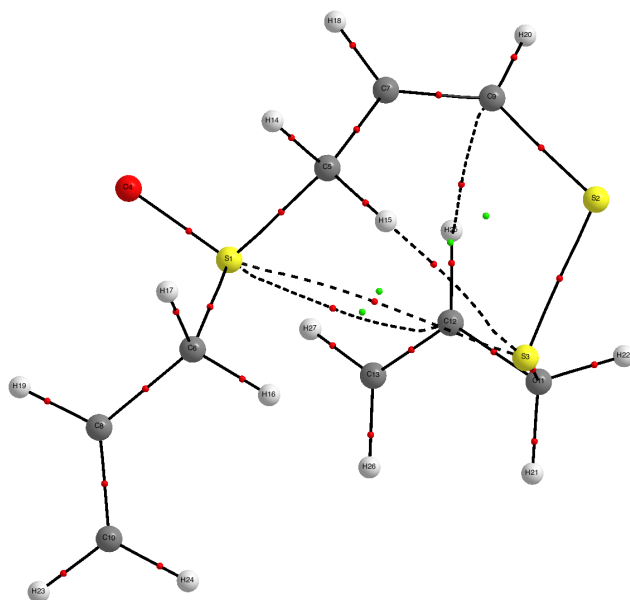

**Figure S330.** Ajoene\_(Z)\_conformer\_210

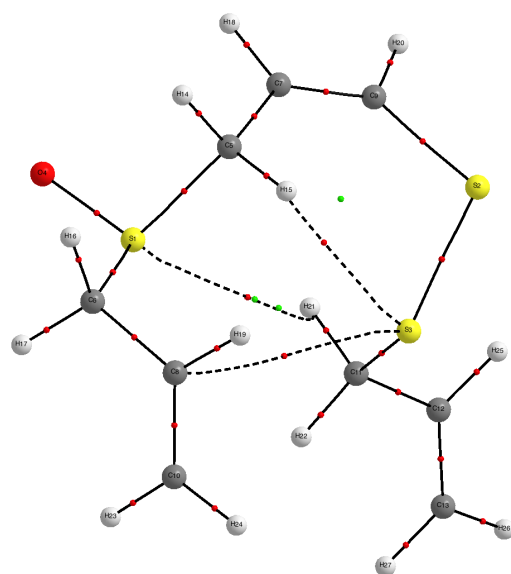

**Figure S331.** Ajoene\_(Z)\_conformer\_211

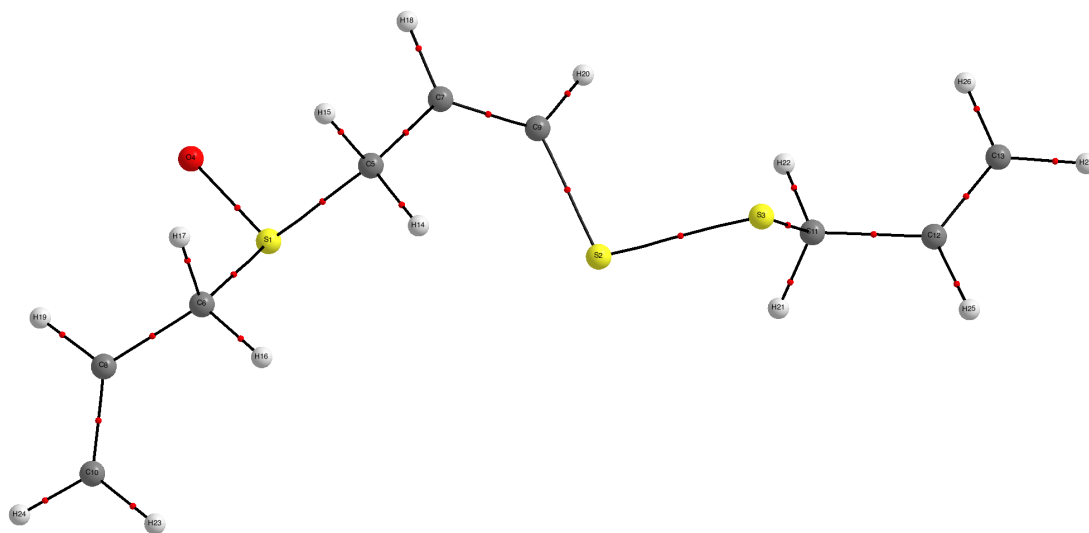

**Figure S332.** Ajoene\_(Z)\_conformer\_212

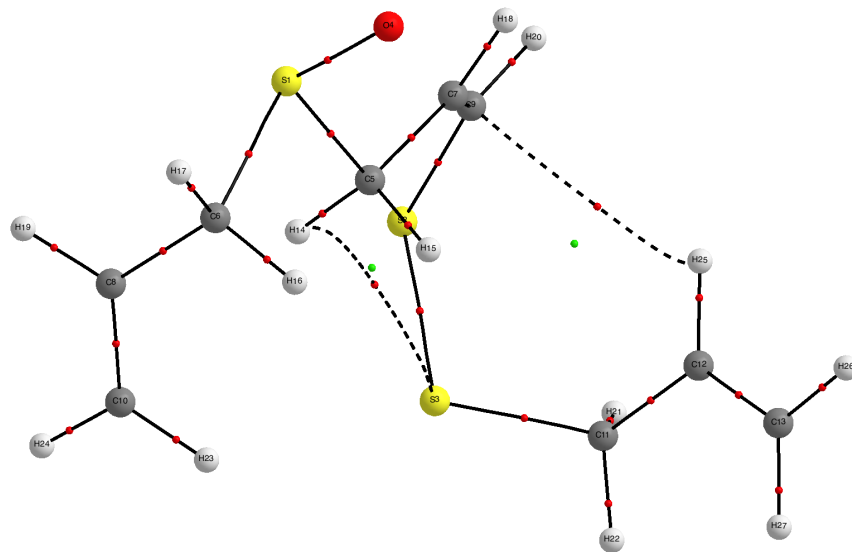

**Figure S333.** Ajoene\_(Z)\_conformer\_213

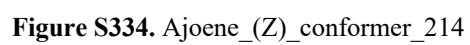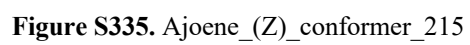

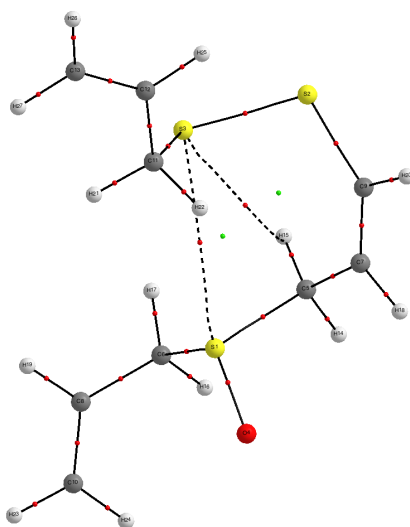

**Figure S336.** Ajoene\_(Z)\_conformer\_216

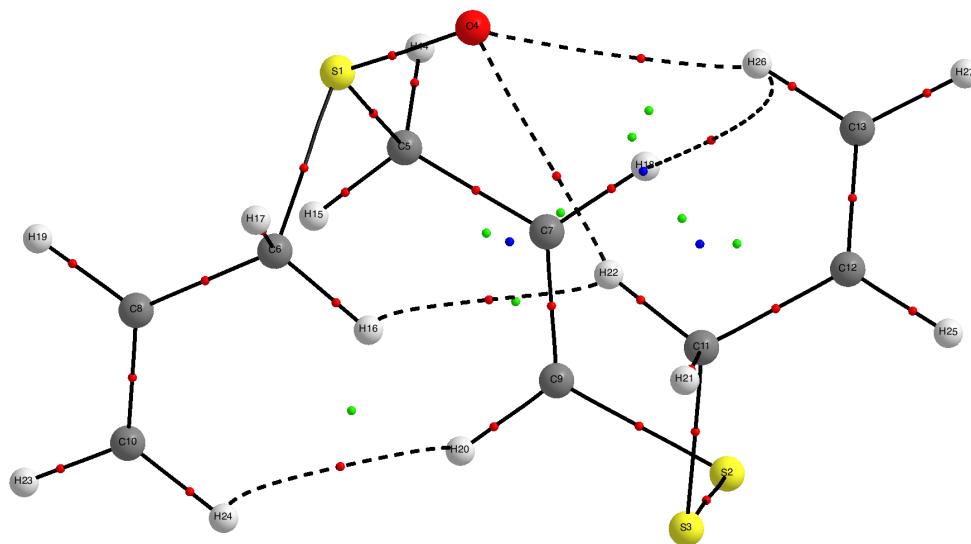

**Figure S337.** Ajoene\_(E)\_conformer\_1

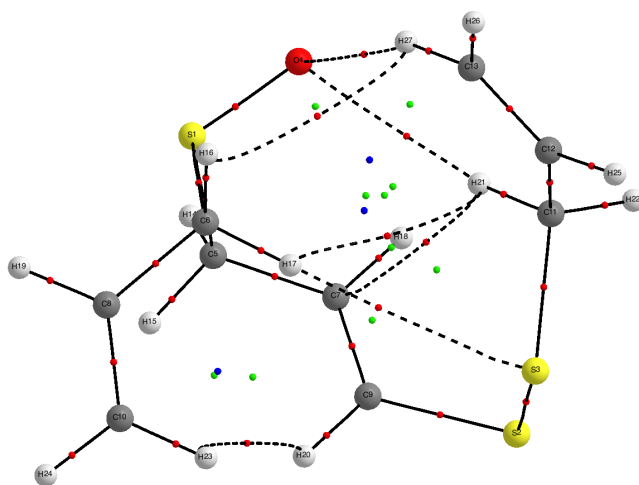

**Figure S338.** Ajoene\_(E)\_conformer\_2

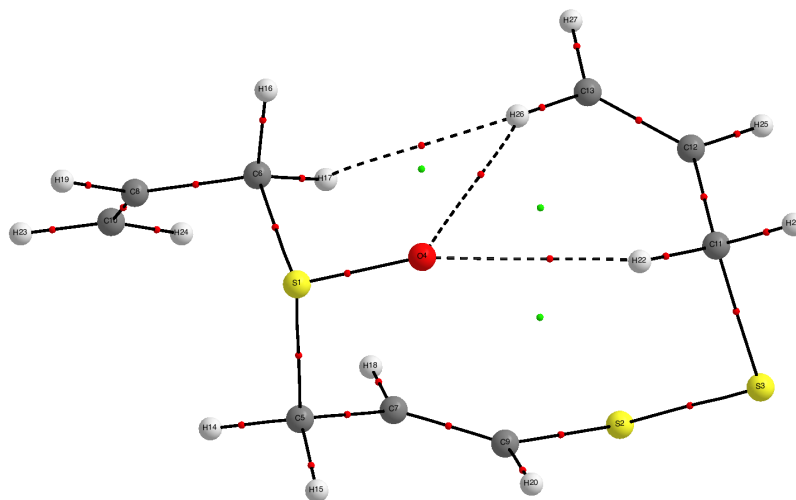

**Figure S339.** Ajoene\_(E)\_conformer\_3



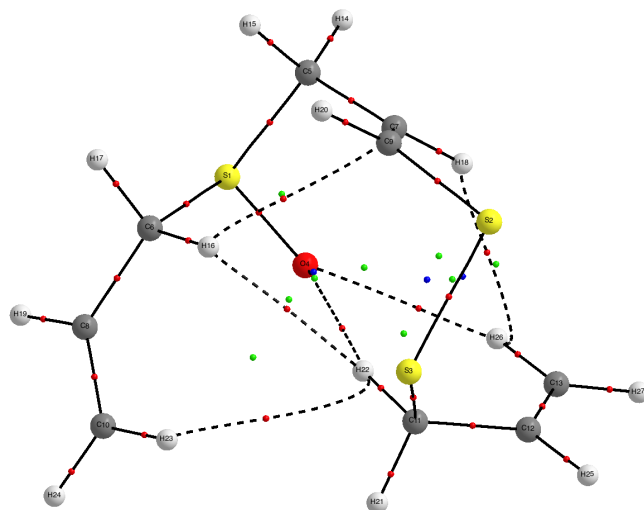

**Figure S340.** Ajoene\_(E)\_conformer\_4

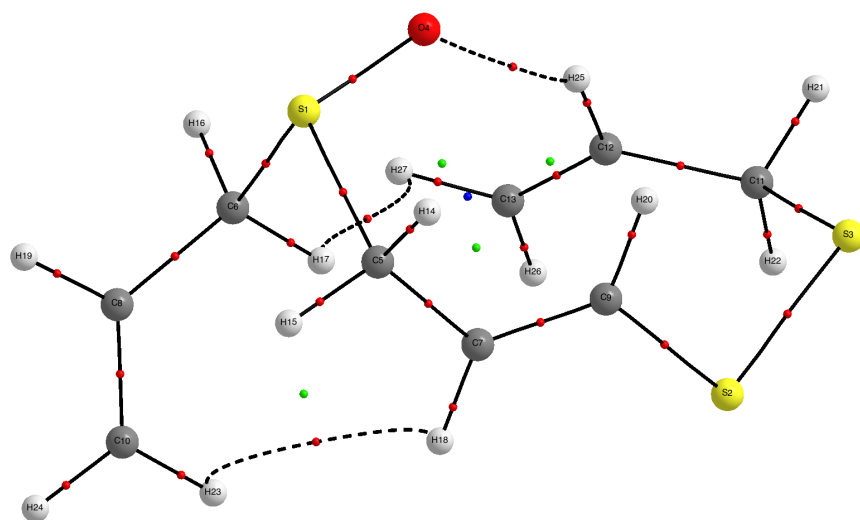

**Figure S341.** Ajoene\_(E)\_conformer\_5

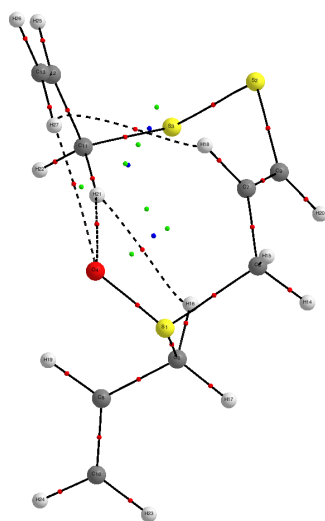

**Figure S342.** Ajoene\_(E)\_conformer\_6

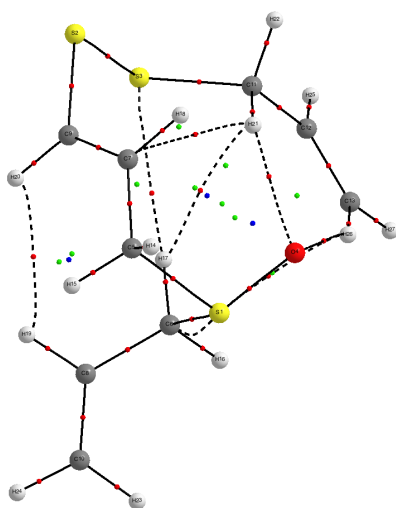

**Figure S343.** Ajoene\_(E)\_conformer\_7

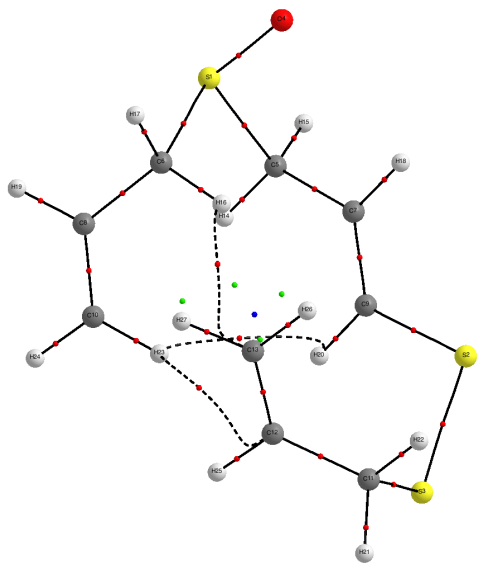

**Figure S344.** Ajoene\_(E)\_conformer\_8

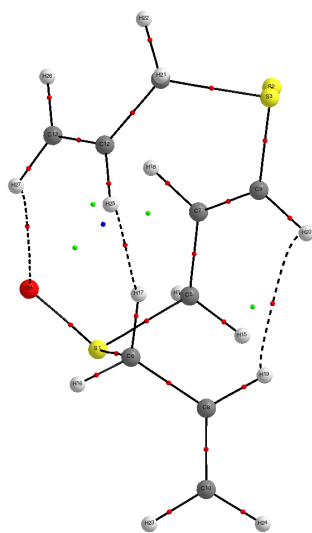

**Figure S345.** Ajoene\_(E)\_conformer\_9

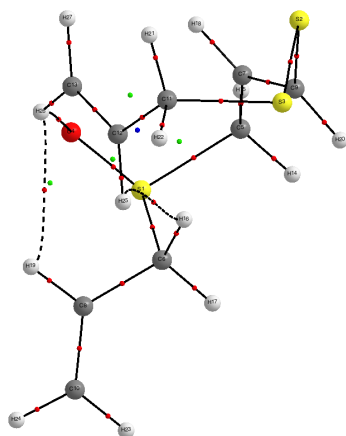

**Figure S346.** Ajoene\_(E)\_conformer\_10

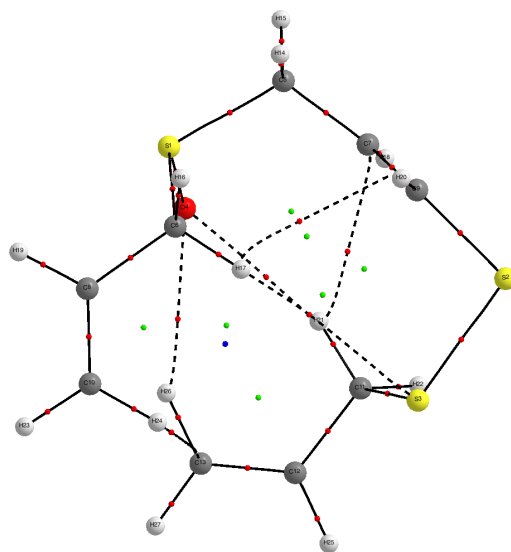

**Figure S347.** Ajoene\_(E)\_conformer\_11

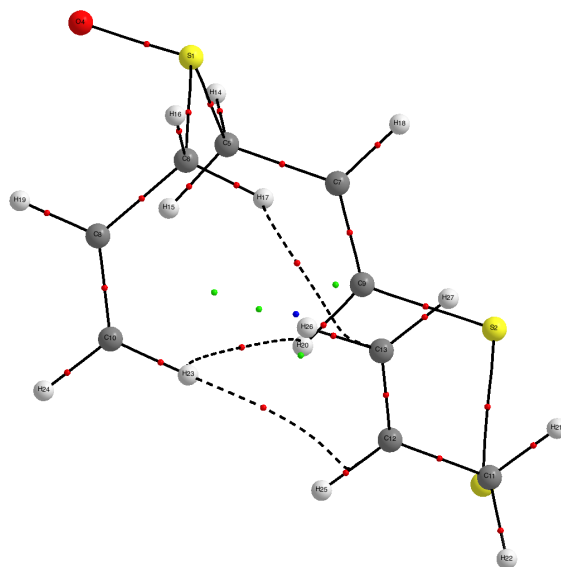

**Figure S348.** Ajoene\_(E)\_conformer\_12

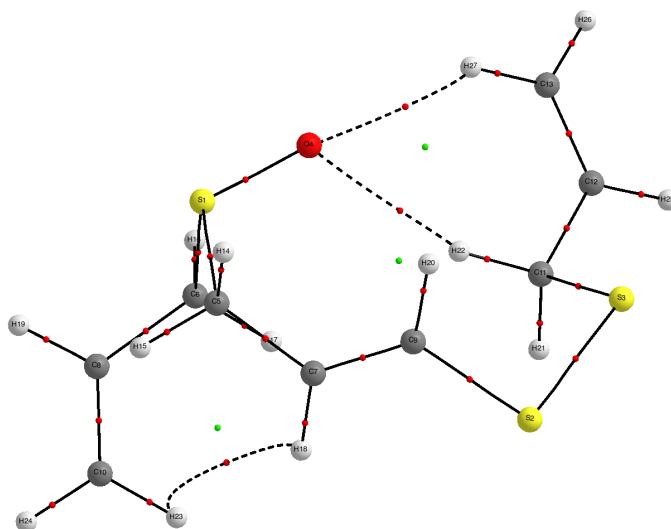

**Figure S349.** Ajoene\_(E)\_conformer\_13

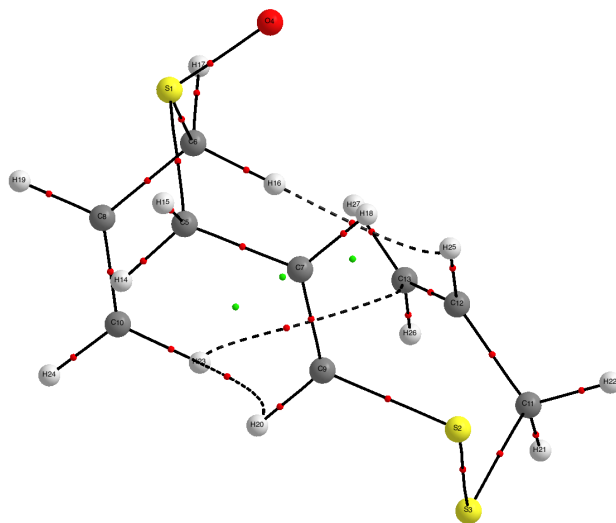

**Figure S350.** Ajoene\_(E)\_conformer\_14

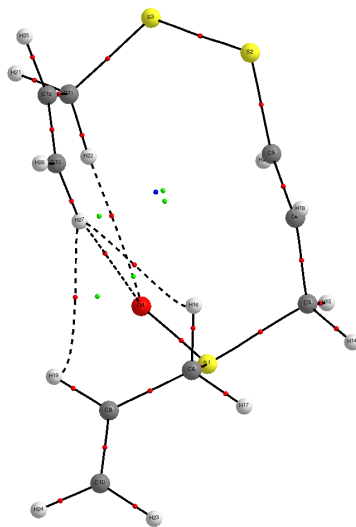

**Figure S351.** Ajoene\_(E)\_conformer\_15

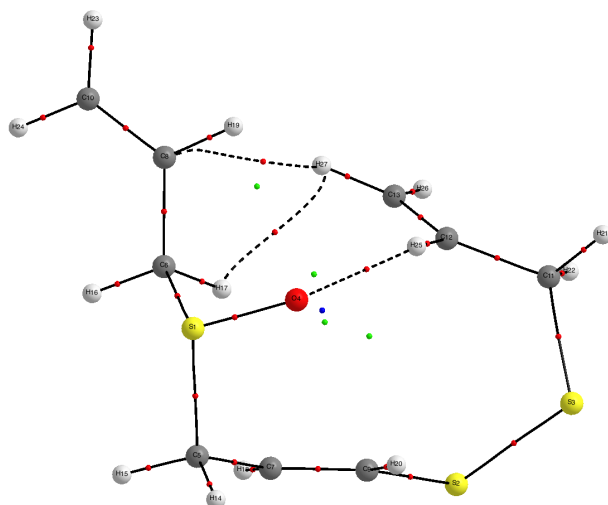

**Figure S352.** Ajoene\_(E)\_conformer\_16

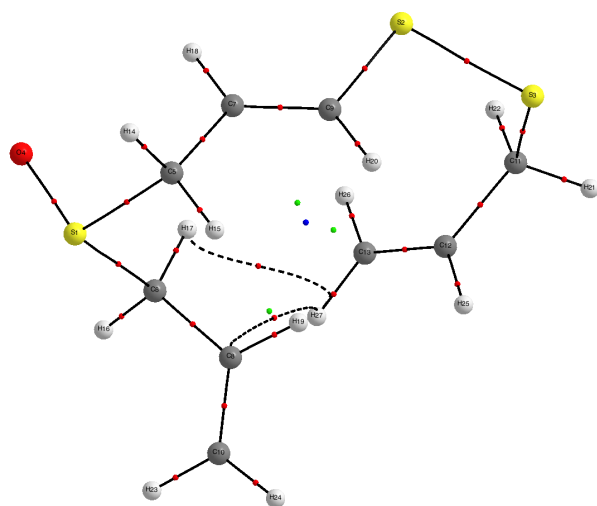

**Figure S353.** Ajoene\_(E)\_conformer\_17

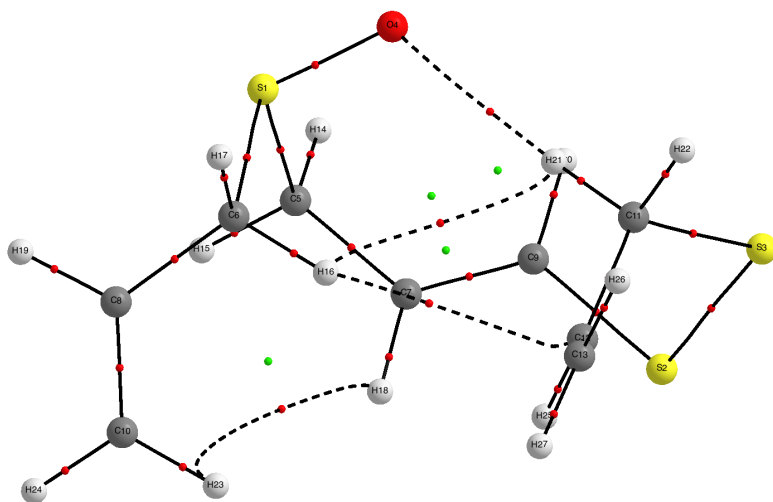

**Figure S354.** Ajoene\_(E)\_conformer\_18

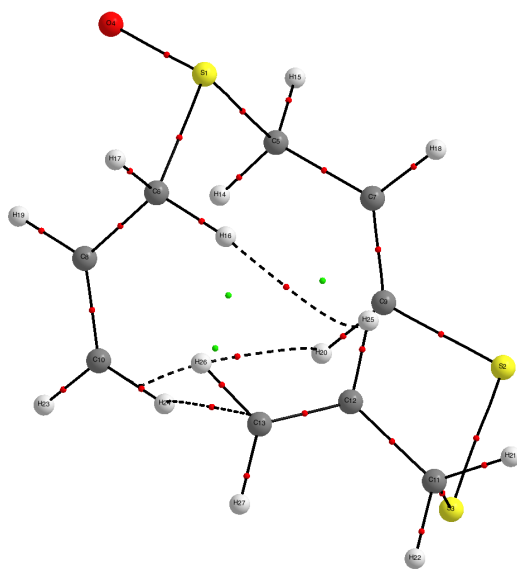

**Figure S355.** Ajoene\_(E)\_conformer\_19



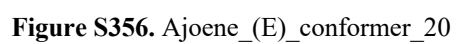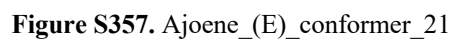

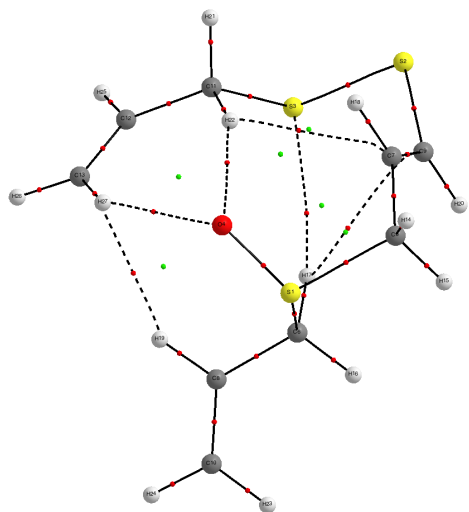

**Figure S358.** Ajoene\_(E)\_conformer\_22

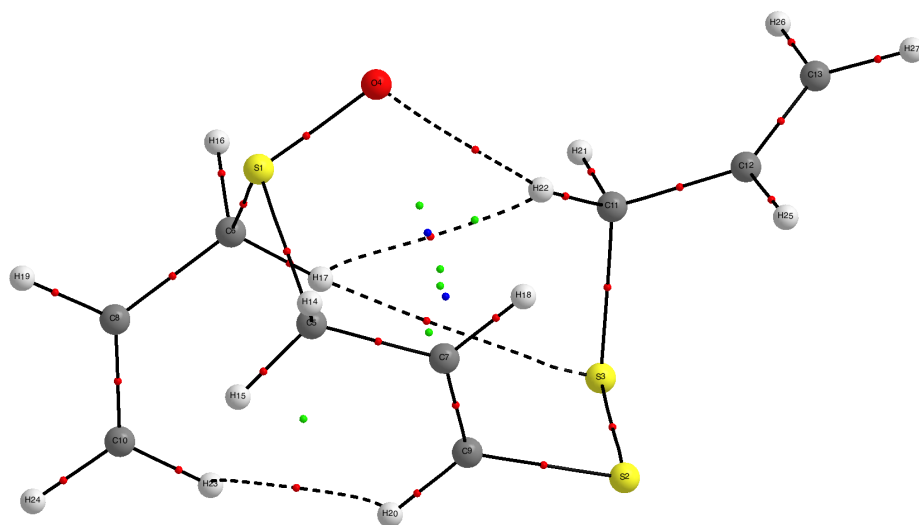

**Figure S359.** Ajoene\_(E)\_conformer\_23

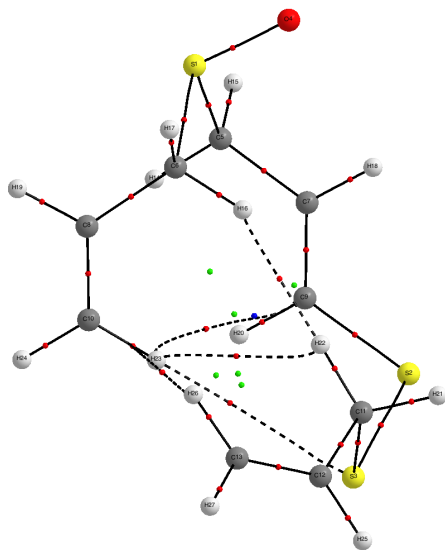

**Figure S360.** Ajoene\_(E)\_conformer\_24

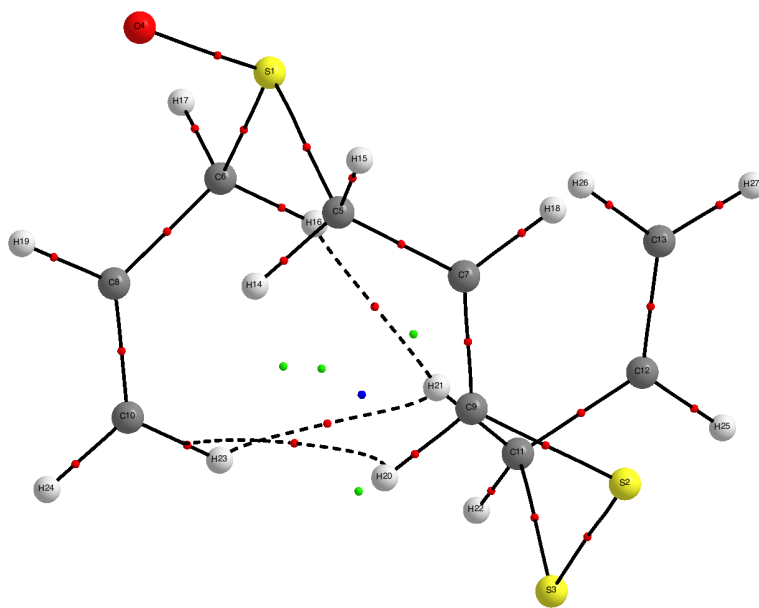

**Figure S361.** Ajoene\_(E)\_conformer\_25

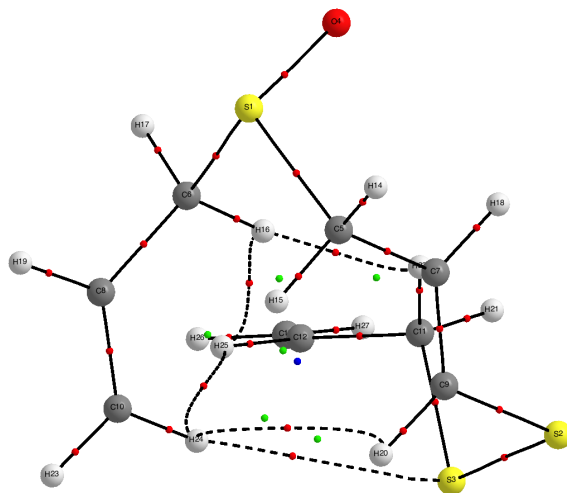

**Figure S362.** Ajoene\_(E)\_conformer\_26

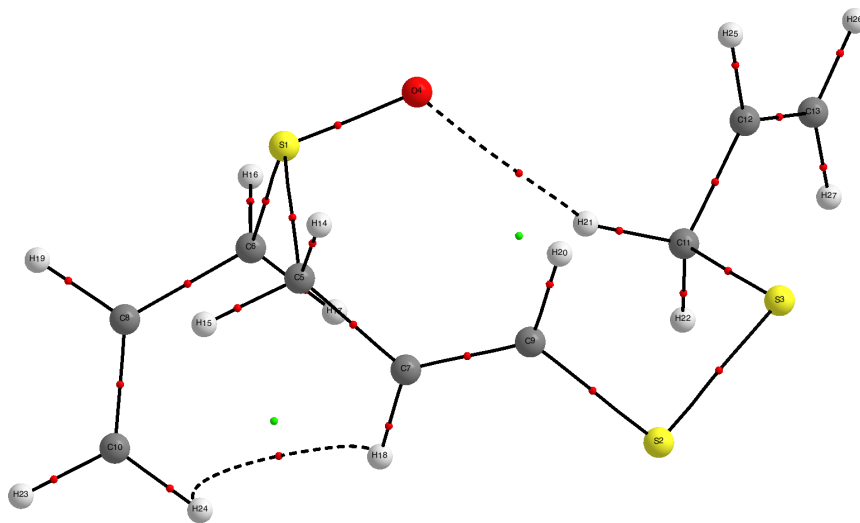

**Figure S363.** Ajoene\_(E)\_conformer\_27

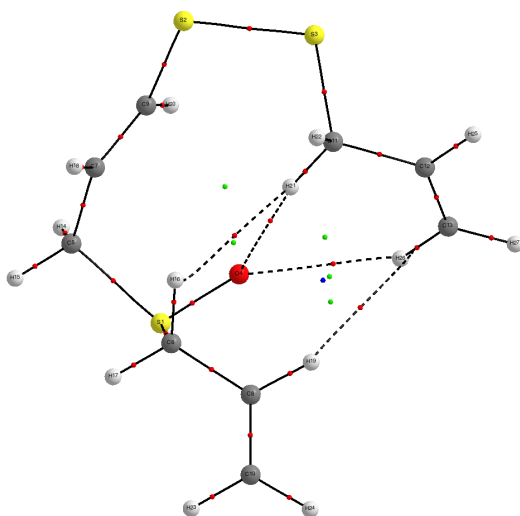

**Figure S364.** Ajoene\_(E)\_conformer\_28

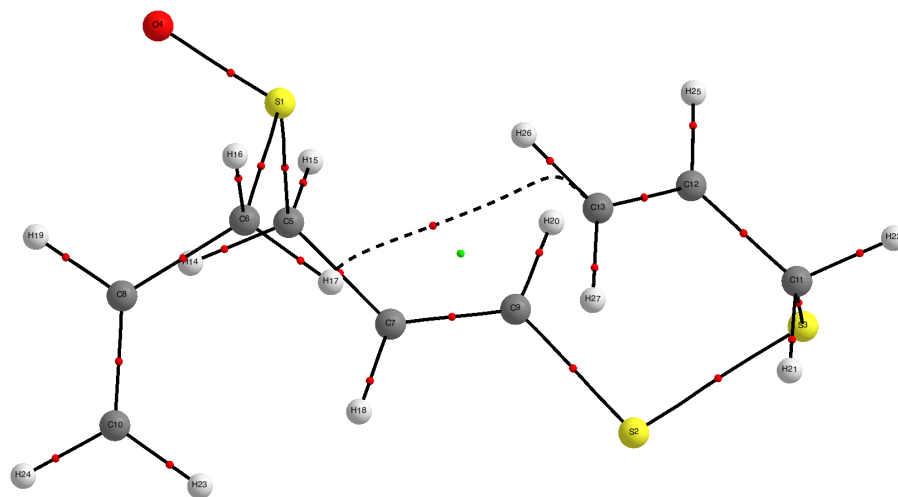

**Figure S365.** Ajoene\_(E)\_conformer\_29

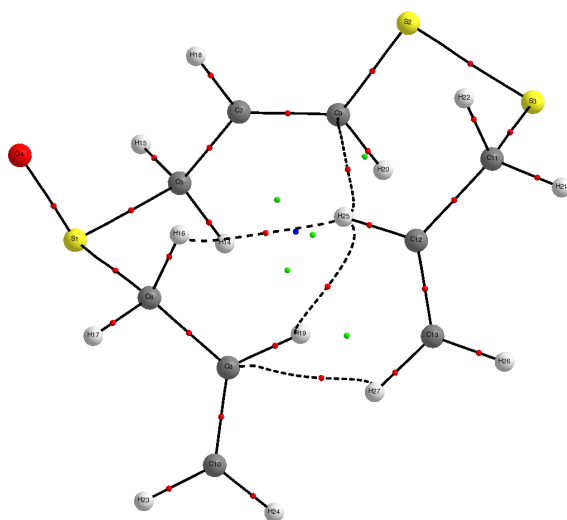

**Figure S366.** Ajoene\_(E)\_conformer\_30

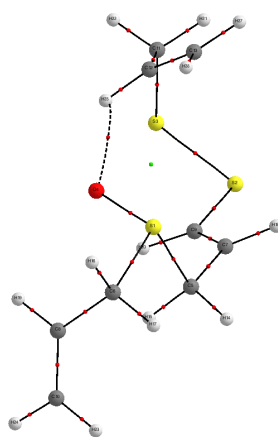

**Figure S367.** Ajoene\_(E)\_conformer\_31

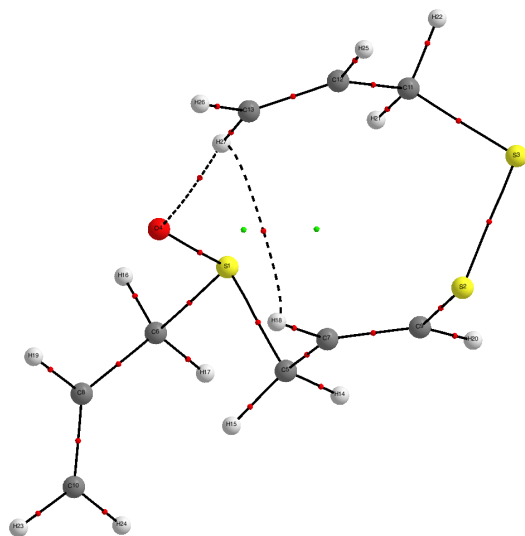

**Figure S368.** Ajoene\_(E)\_conformer\_32

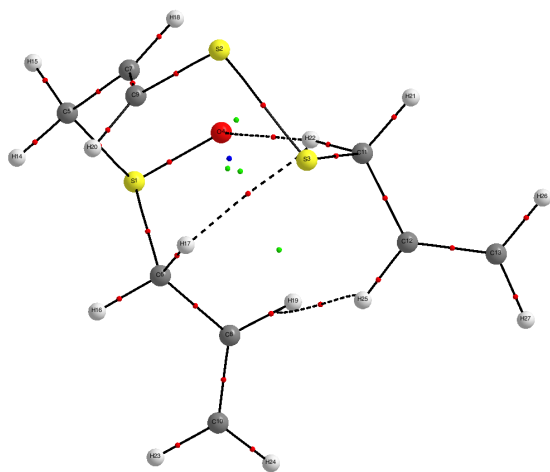

**Figure S369.** Ajoene\_(E)\_conformer\_33

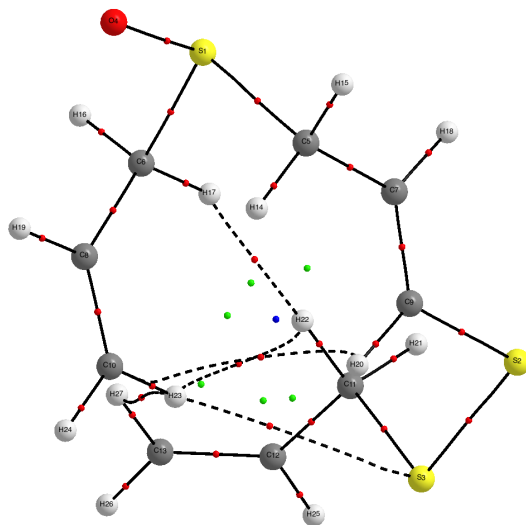

**Figure S370.** Ajoene\_(E)\_conformer\_34

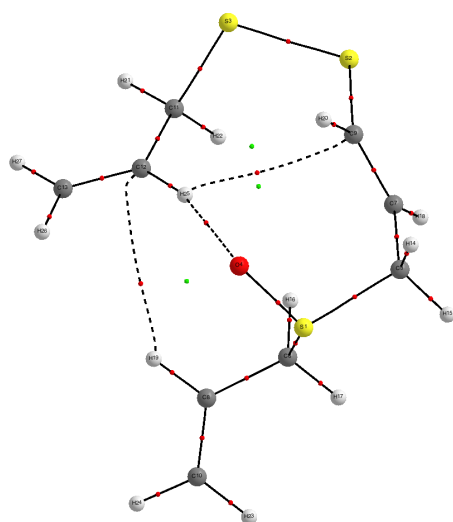

**Figure S371.** Ajoene\_(E)\_conformer\_35



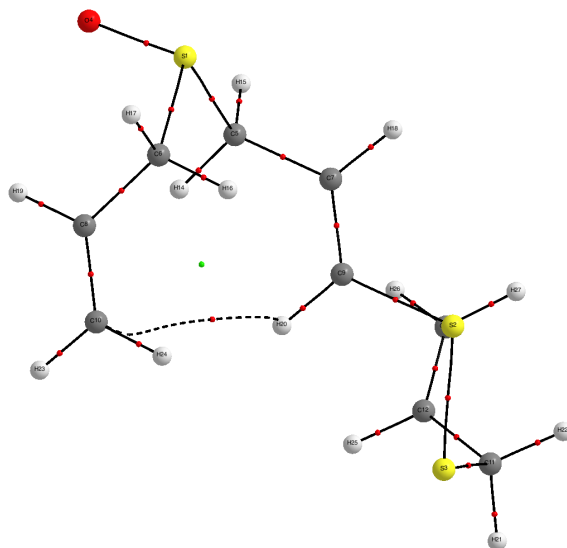

**Figure S372.** Ajoene\_(E)\_conformer\_36

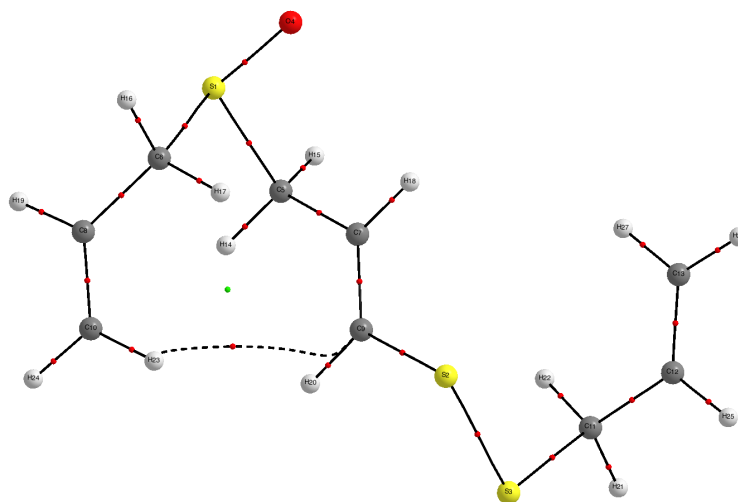

**Figure S373.** Ajoene\_(E)\_conformer\_37

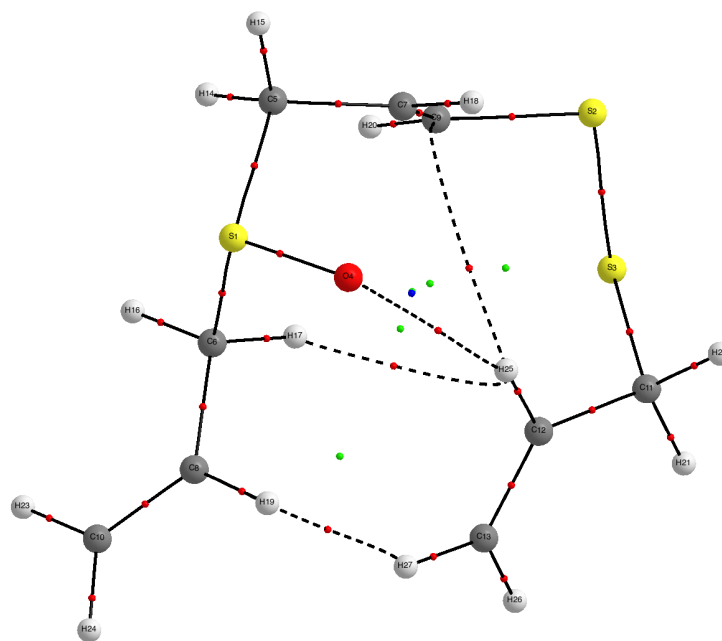

**Figure S374.** Ajoene\_(E)\_conformer\_38

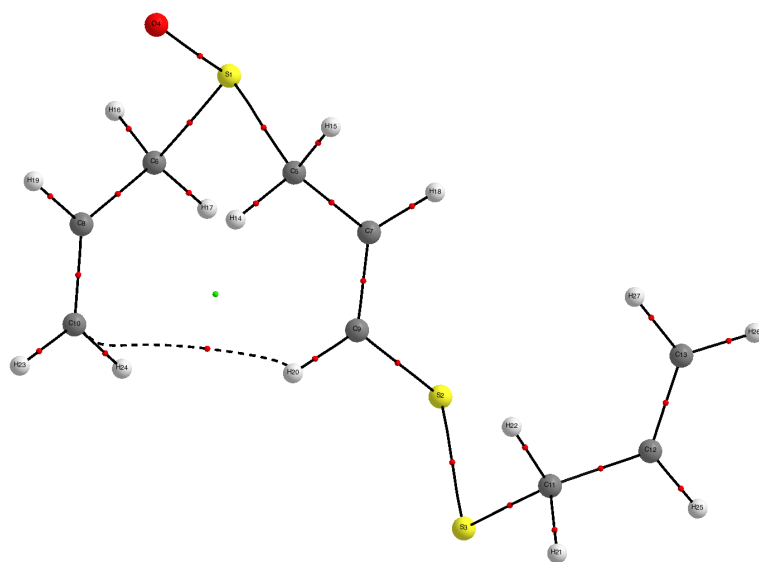

**Figure S375.** Ajoene\_(E)\_conformer\_39

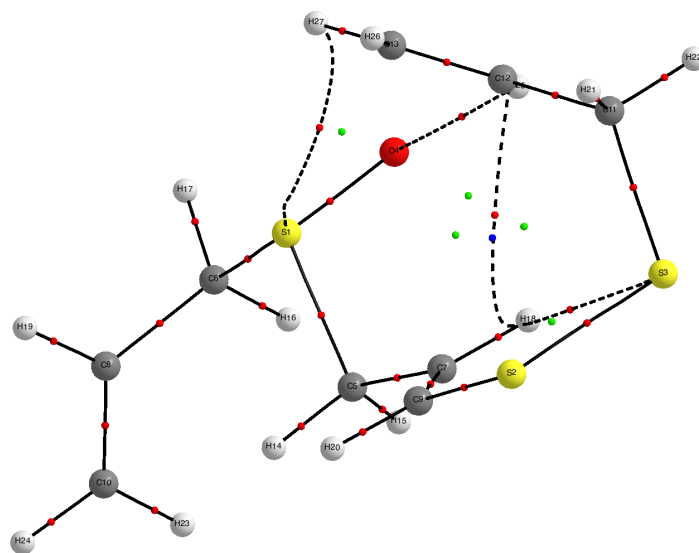

**Figure S376.** Ajoene\_(E)\_conformer\_40

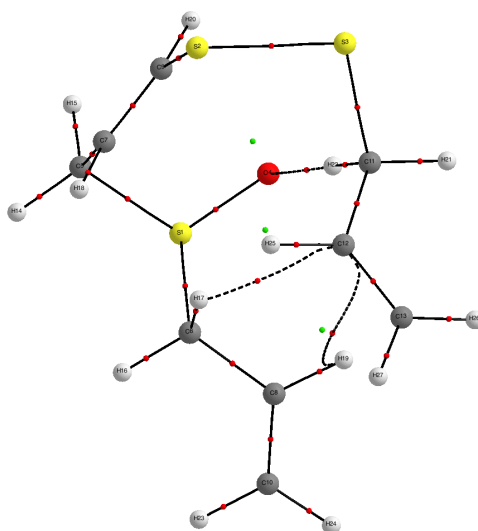

**Figure S377.** Ajoene\_(E)\_conformer\_41

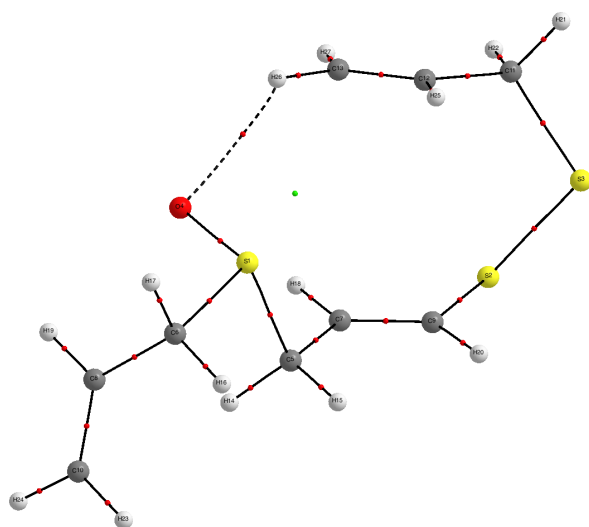

**Figure S378.** Ajoene\_(E)\_conformer\_42

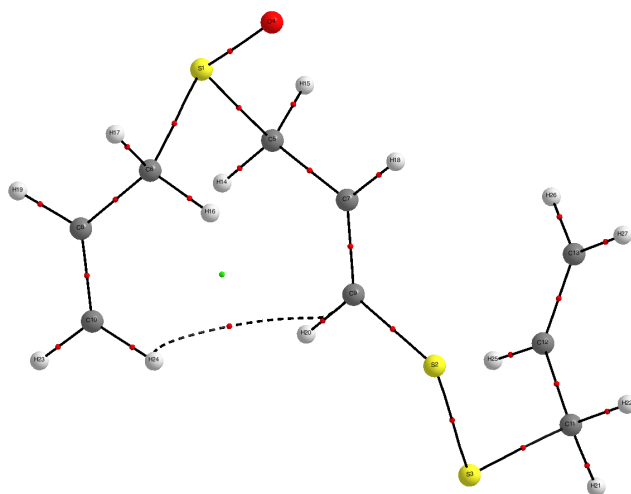

**Figure S379.** Ajoene\_(E)\_conformer\_43

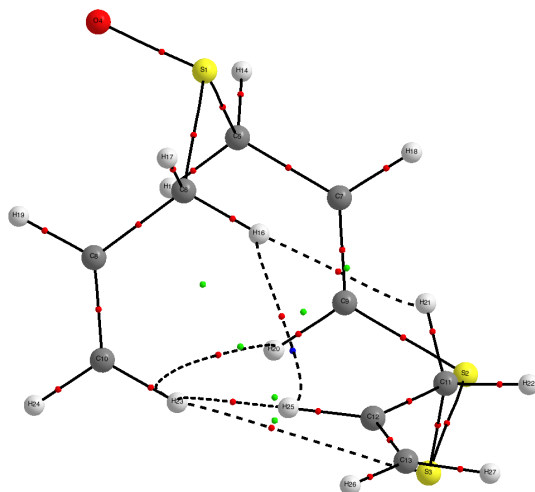

**Figure S380.** Ajoene\_(E)\_conformer\_44

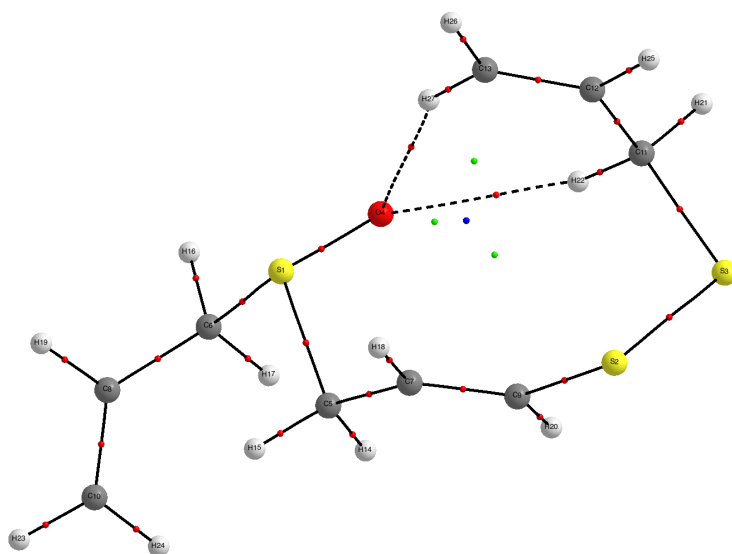

**Figure S381.** Ajoene\_(E)\_conformer\_45

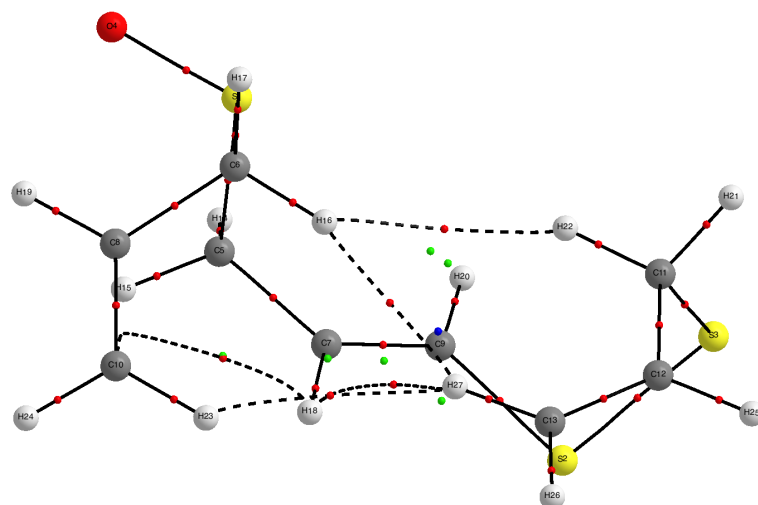

**Figure S382.** Ajoene\_(E)\_conformer\_46

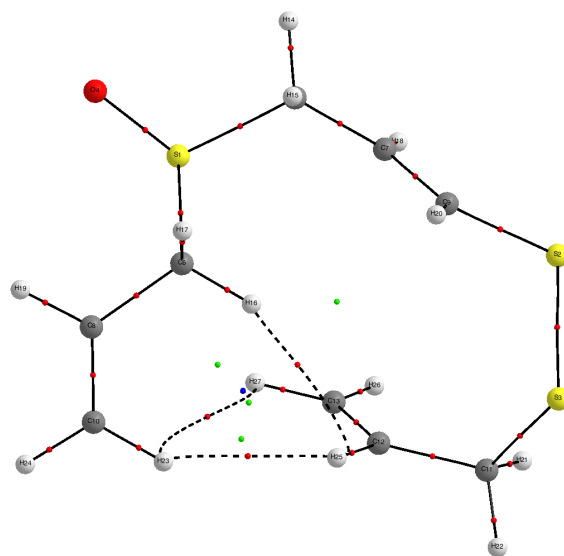

**Figure S383.** Ajoene\_(E)\_conformer\_47

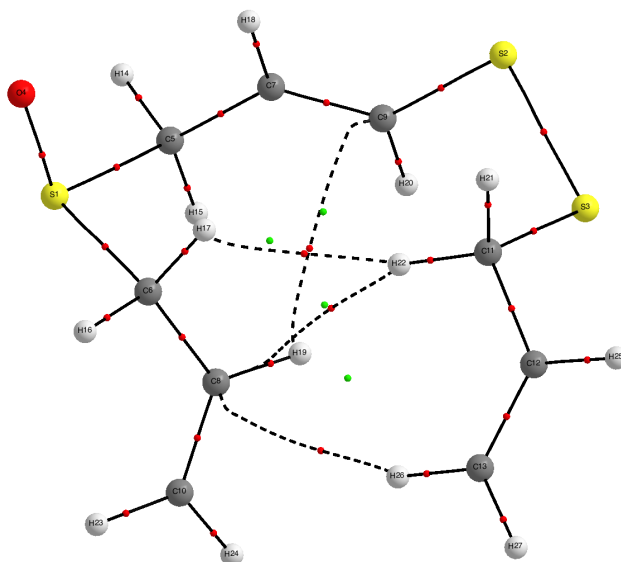

**Figure S384.** Ajoene\_(E)\_conformer\_48

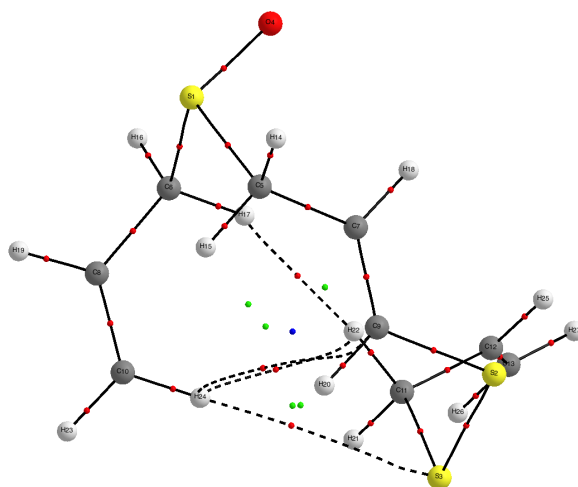

**Figure S385.** Ajoene\_(E)\_conformer\_49

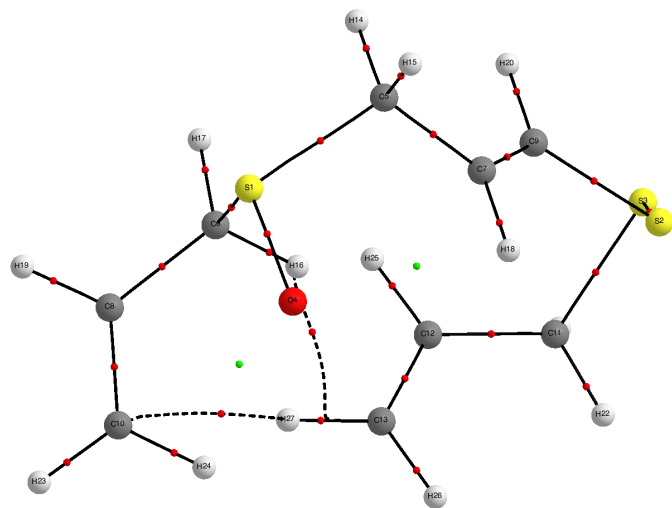

**Figure S386.** Ajoene\_(E)\_conformer\_50

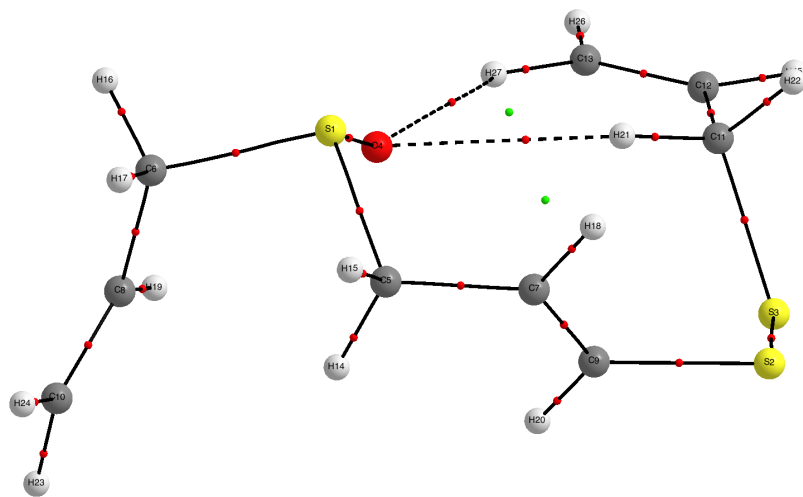

**Figure S387.** Ajoene\_(E)\_conformer\_51



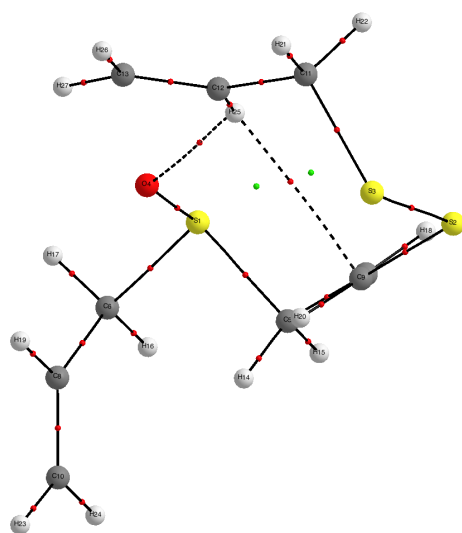

**Figure S388.** Ajoene\_(E)\_conformer\_52

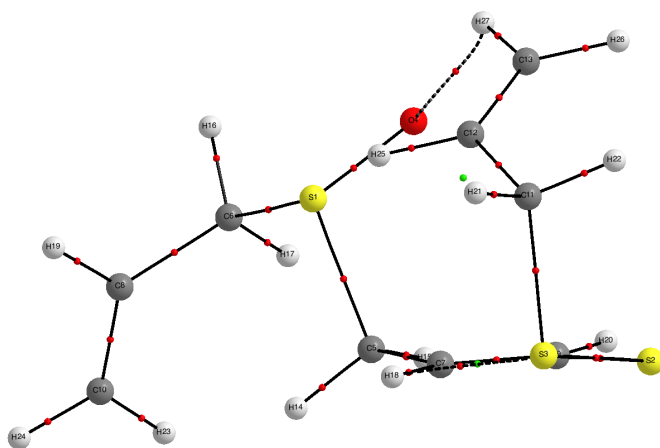

**Figure S389.** Ajoene\_(E)\_conformer\_53

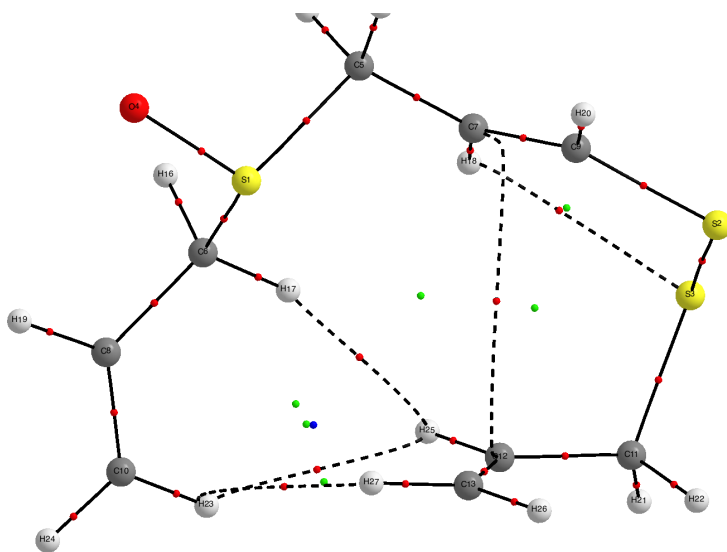

**Figure S390.** Ajoene\_(E)\_conformer\_54

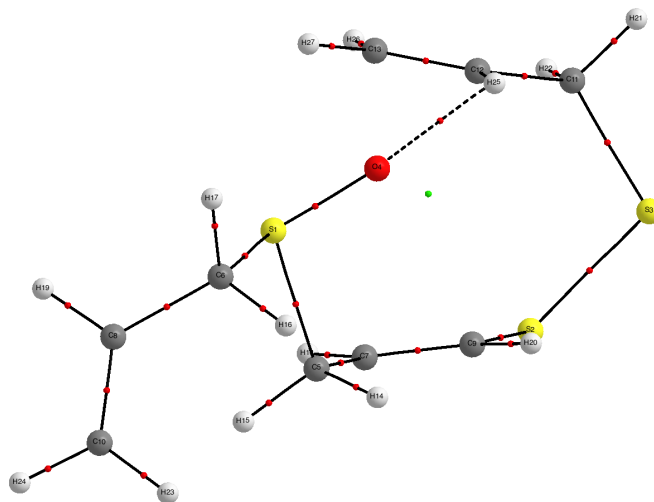

**Figure S391.** Ajoene\_(E)\_conformer\_55

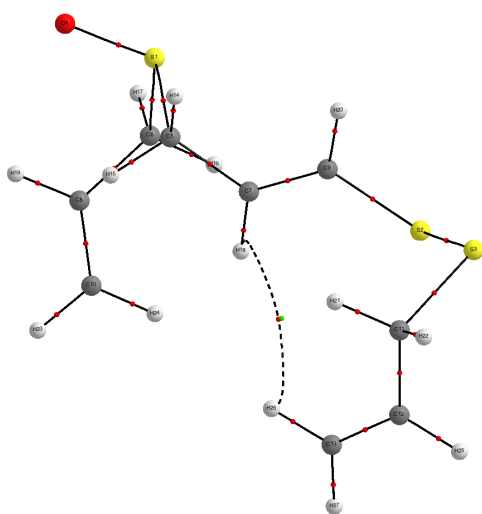

**Figure S392.** Ajoene\_(E)\_conformer\_56

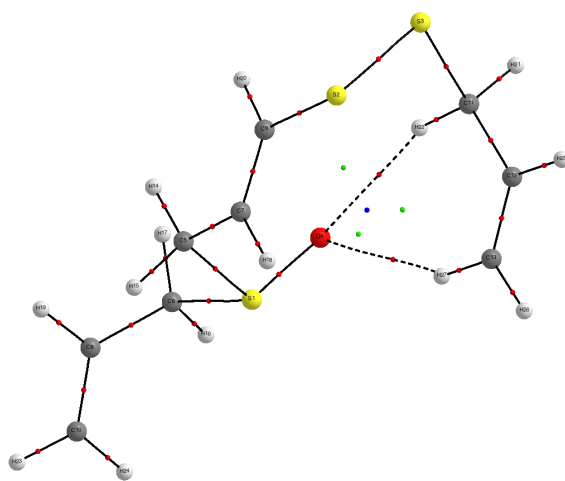

**Figure S393.** Ajoene\_(E)\_conformer\_57

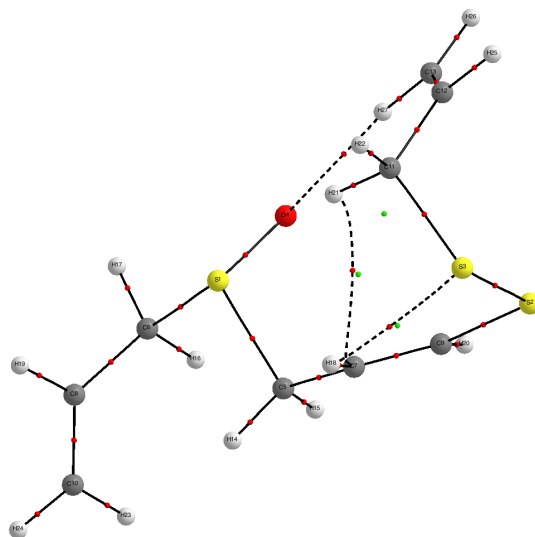

**Figure S394.** Ajoene\_(E)\_conformer\_58

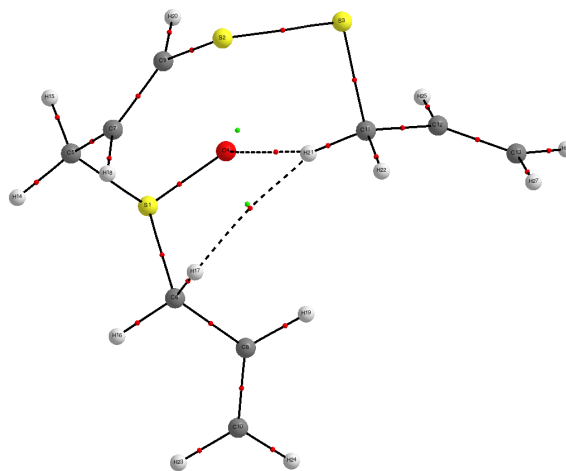

**Figure S395.** Ajoene\_(E)\_conformer\_59

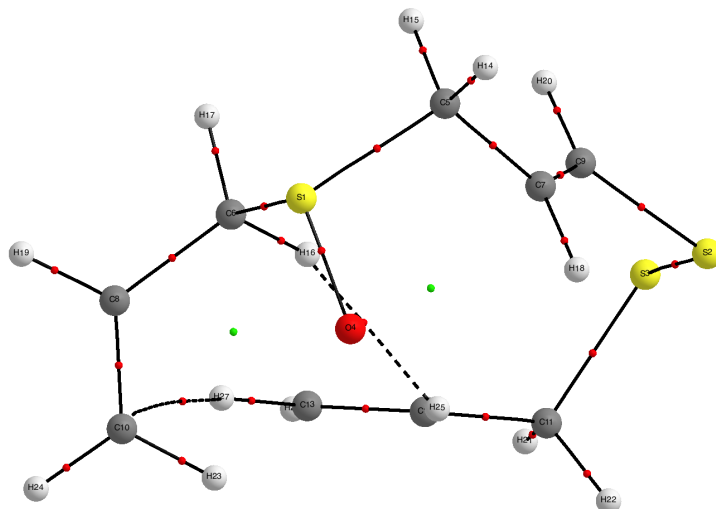

**Figure S396.** Ajoene\_(E)\_conformer\_60

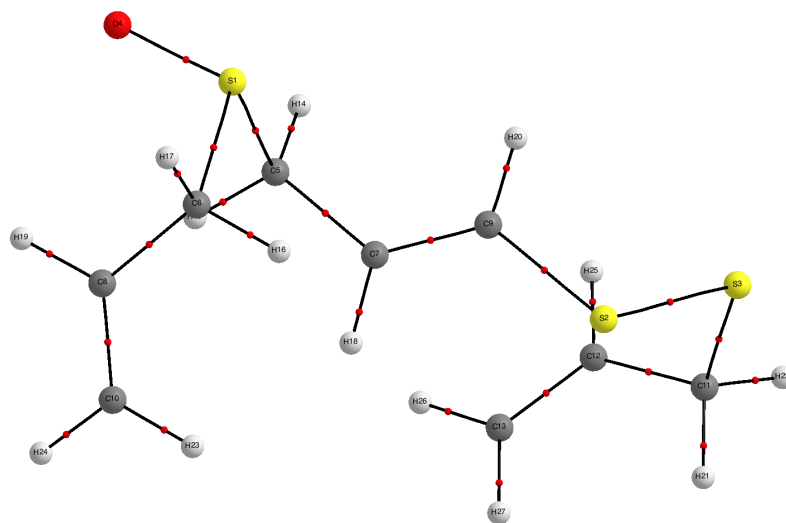

**Figure S397.** Ajoene\_(E)\_conformer\_61

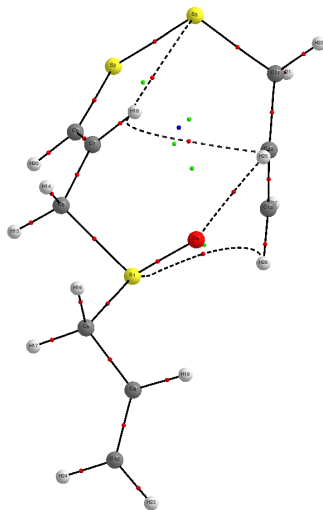

**Figure S398.** Ajoene\_(E)\_conformer\_62

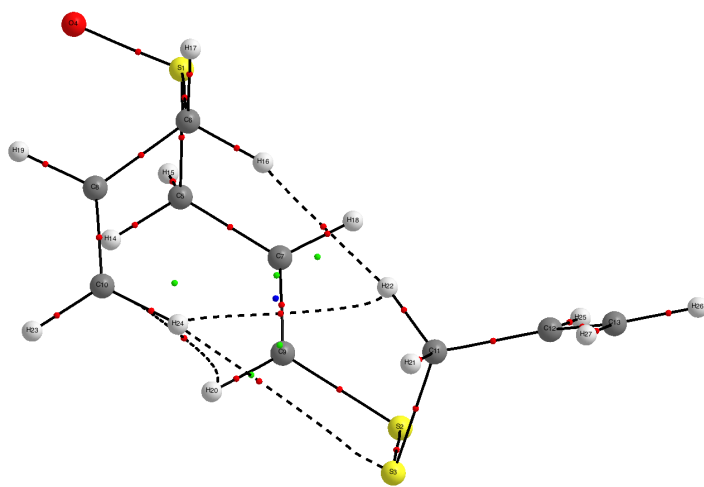

**Figure S399.** Ajoene\_(E)\_conformer\_63

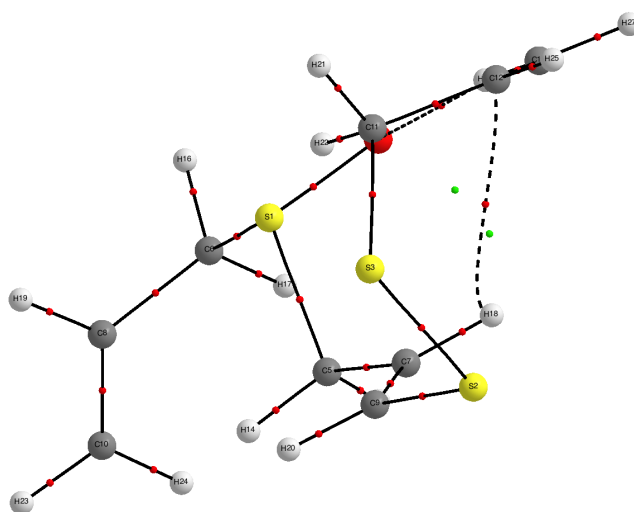

**Figure S400.** Ajoene\_(E)\_conformer\_64

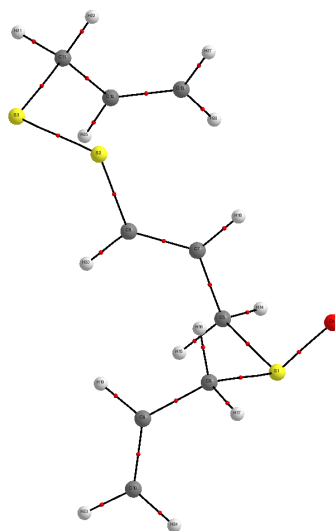

**Figure S401.** Ajoene\_(E)\_conformer\_65

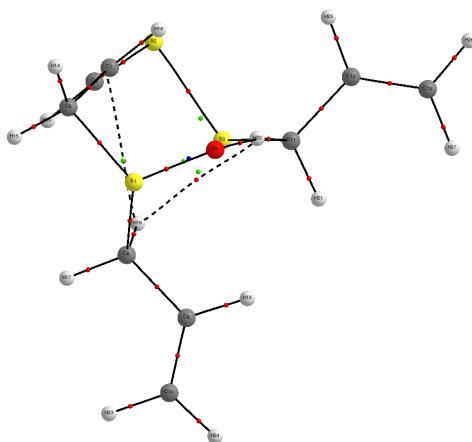

**Figure S402.** Ajoene\_(E)\_conformer\_66

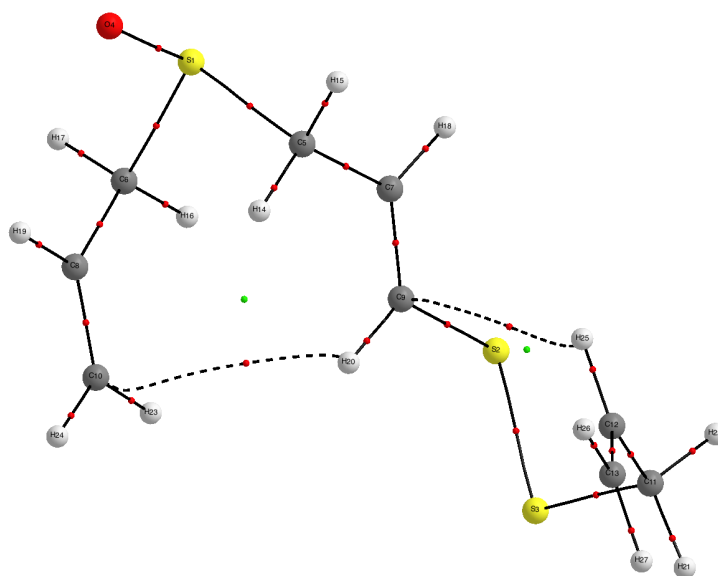

**Figure S403.** Ajoene\_(E)\_conformer\_67



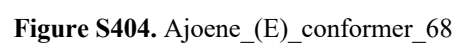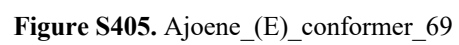

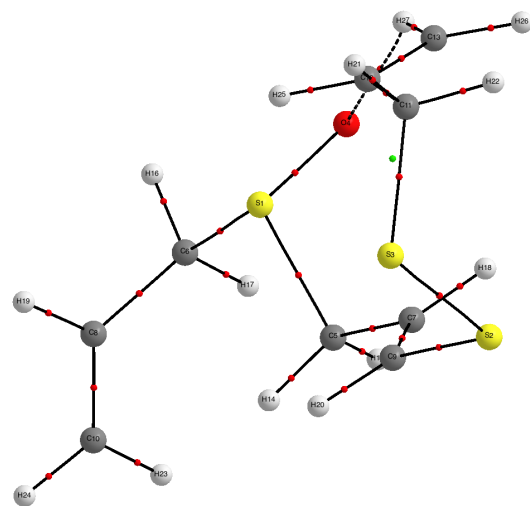

**Figure S406.** Ajoene\_(E)\_conformer\_70

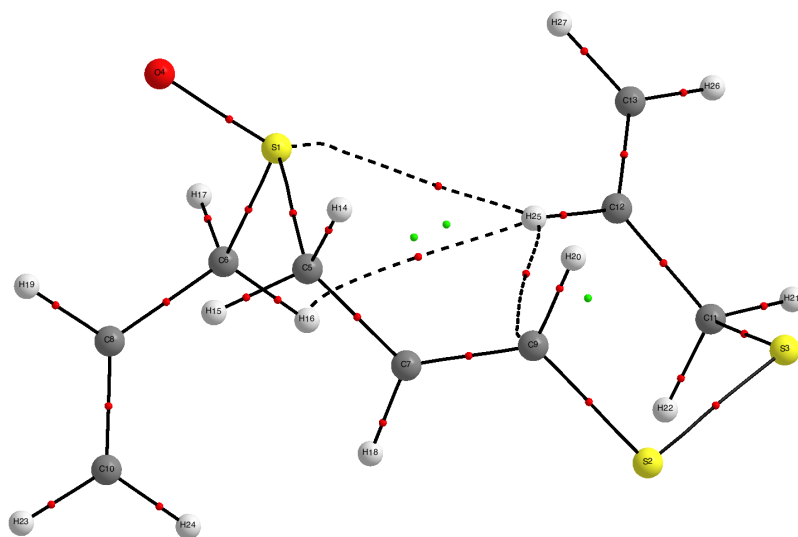

**Figure S407.** Ajoene\_(E)\_conformer\_71

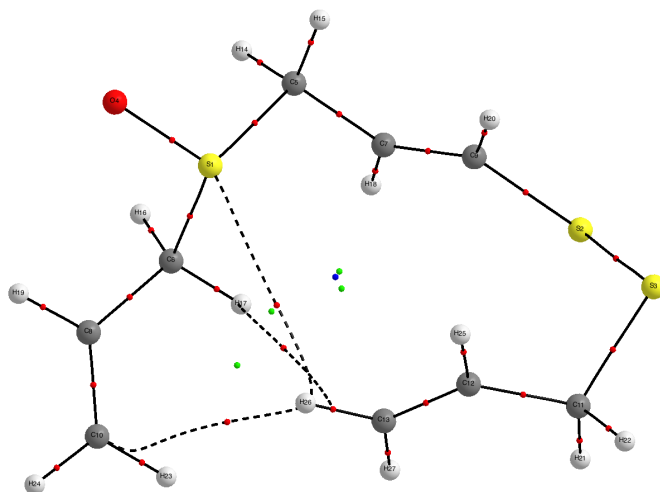

**Figure S408.** Ajoene\_(E)\_conformer\_72

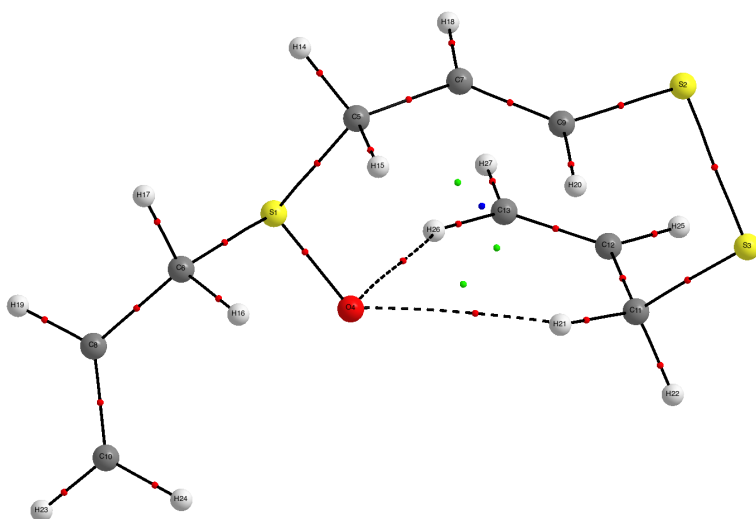

**Figure S409.** Ajoene\_(E)\_conformer\_73

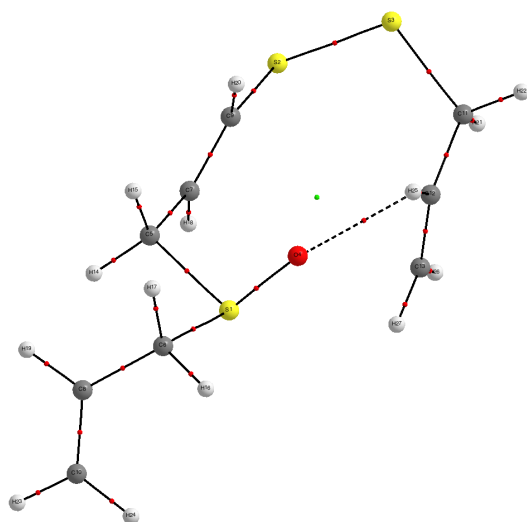

**Figure S410.** Ajoene\_(E)\_conformer\_74

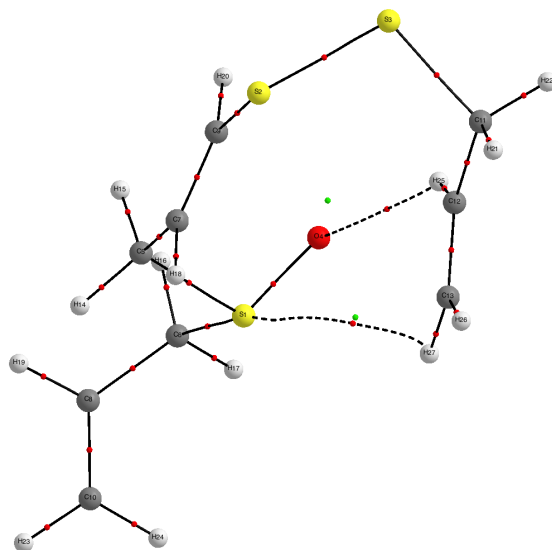

**Figure S411.** Ajoene\_(E)\_conformer\_75

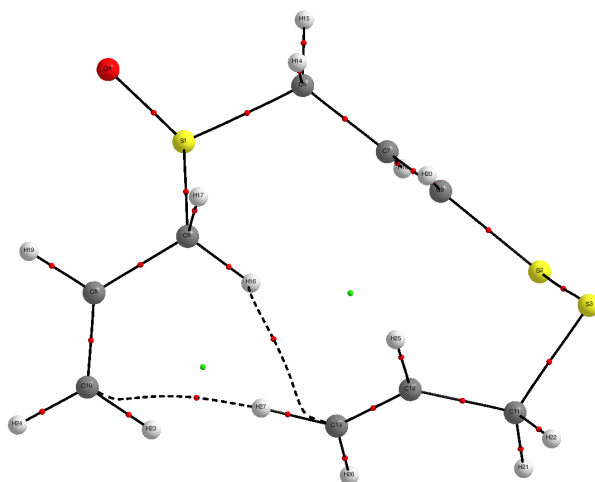

**Figure S412.** Ajoene\_(E)\_conformer\_76

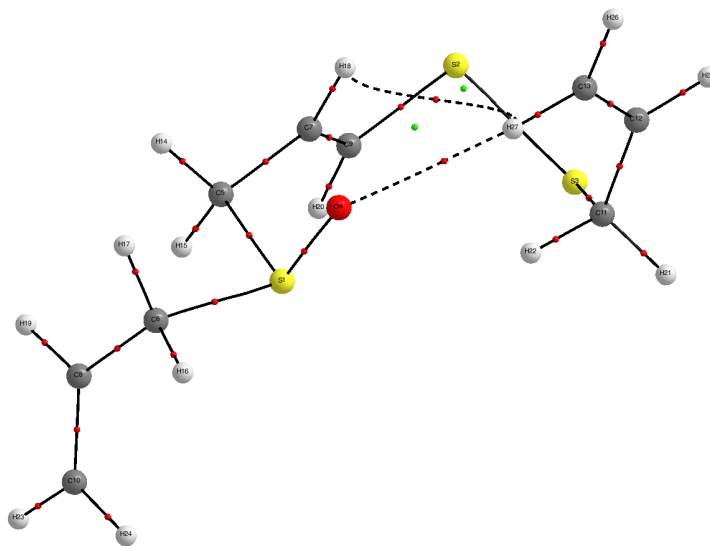

**Figure S413.** Ajoene\_(E)\_conformer\_77

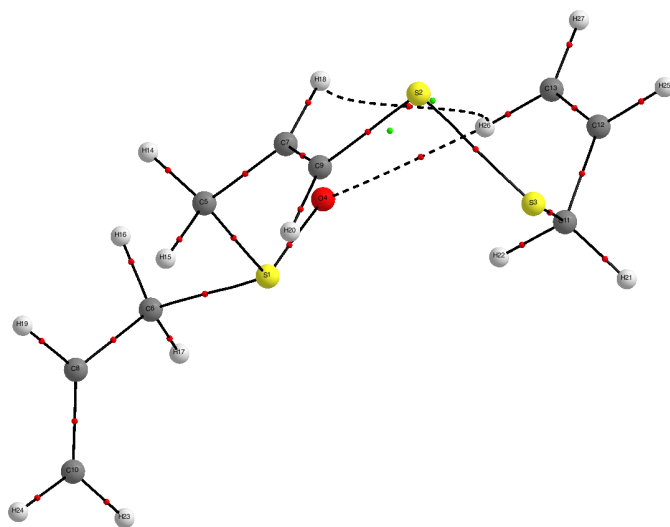

**Figure S414.** Ajoene\_(E)\_conformer\_78

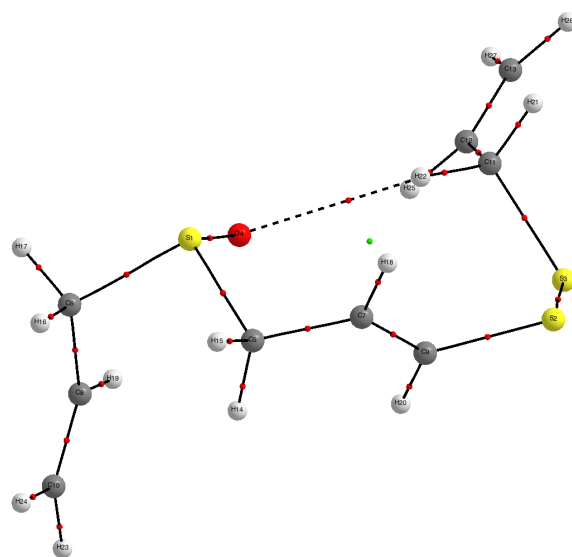

**Figure S415.** Ajoene\_(E)\_conformer\_79

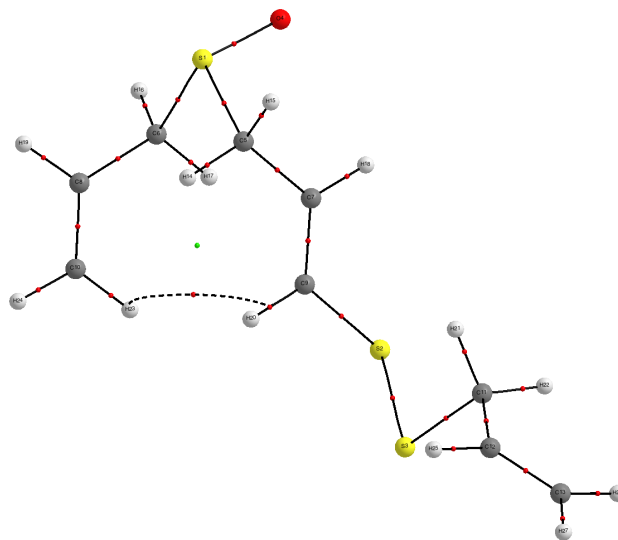

**Figure S416.** Ajoene\_(E)\_conformer\_80

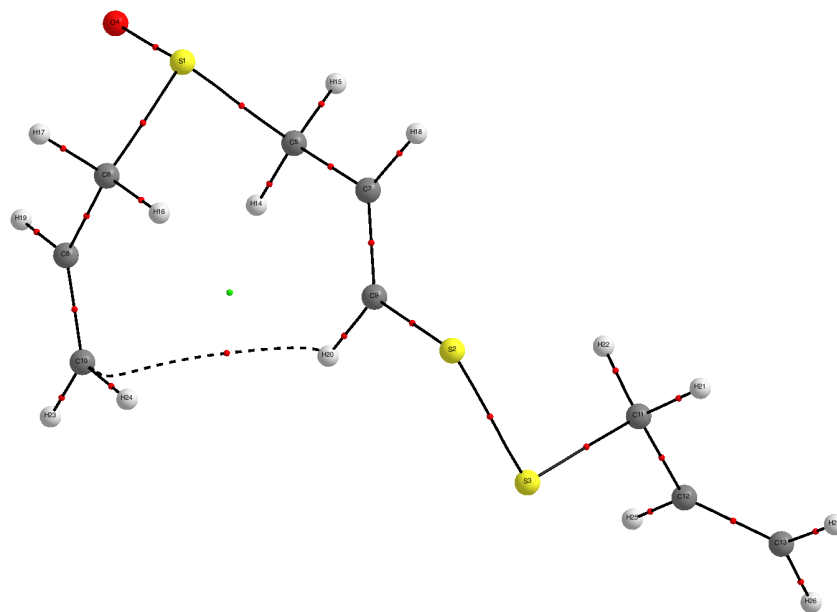

**Figure S417.** Ajoene\_(E)\_conformer\_81

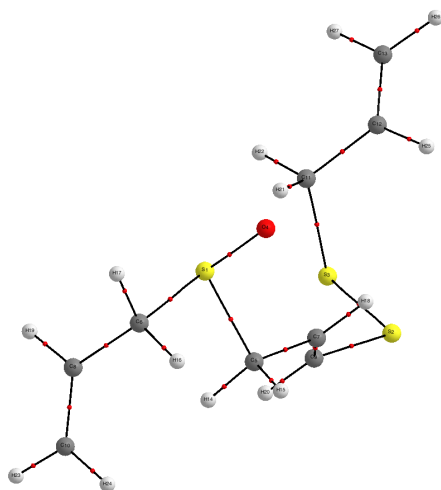

**Figure S418.** Ajoene\_(E)\_conformer\_82

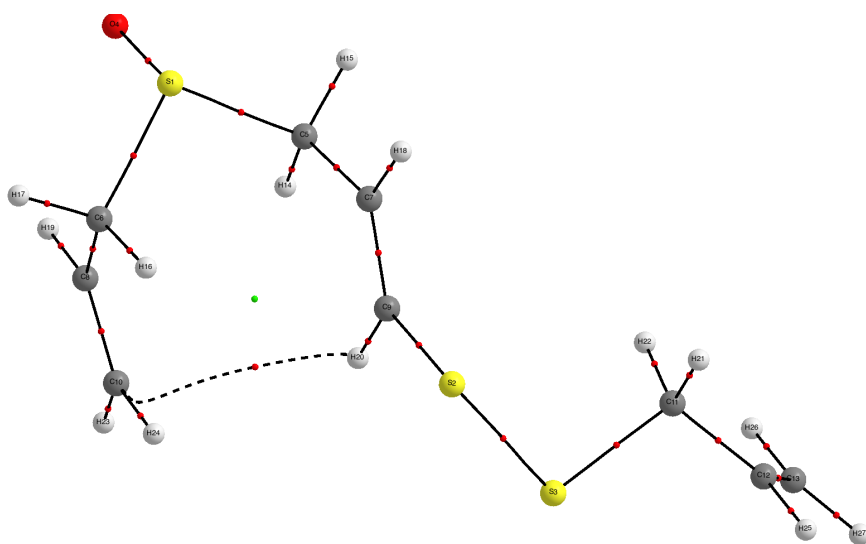

**Figure S419.** Ajoene\_(E)\_conformer\_83



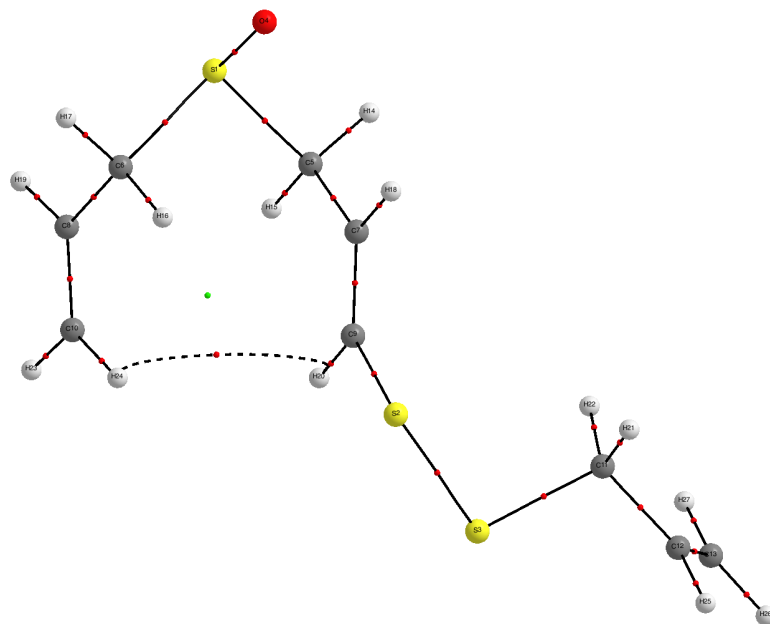

**Figure S420.** Ajoene\_(E)\_conformer\_84

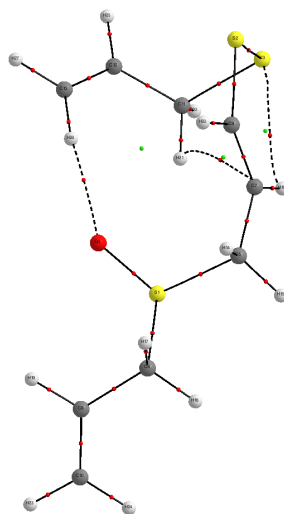

**Figure S421.** Ajoene\_(E)\_conformer\_85

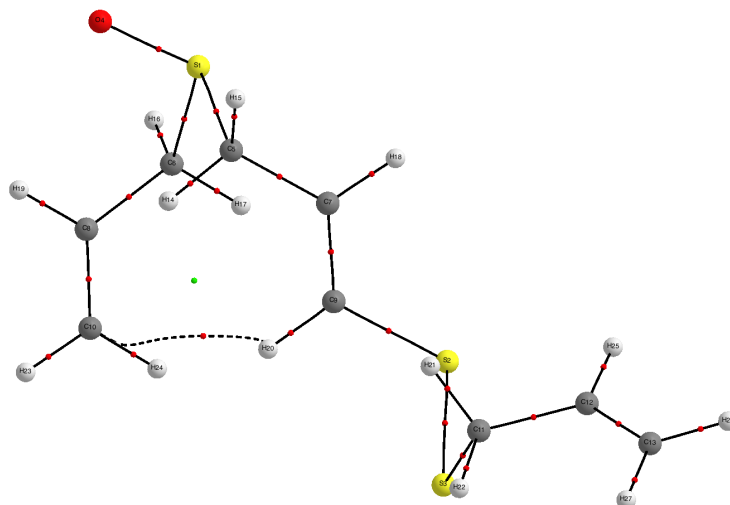

**Figure S422.** Ajoene\_(E)\_conformer\_86

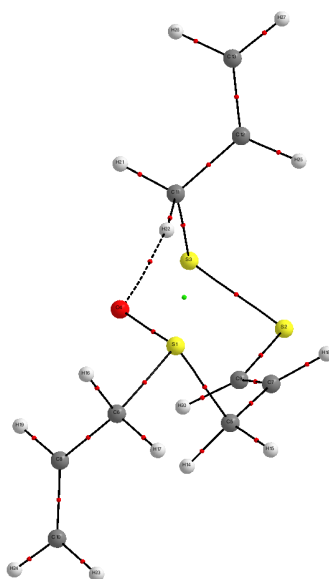

**Figure S423.** Ajoene\_(E)\_conformer\_87

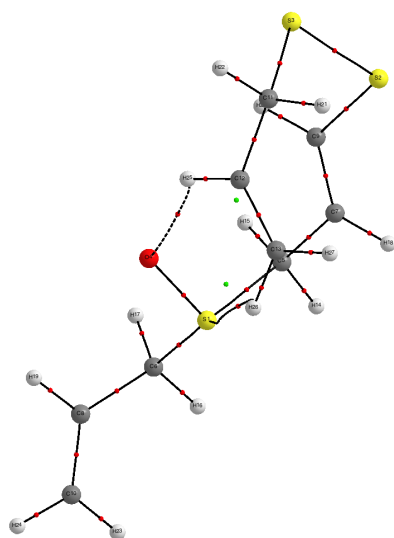

**Figure S424.** Ajoene\_(E)\_conformer\_88

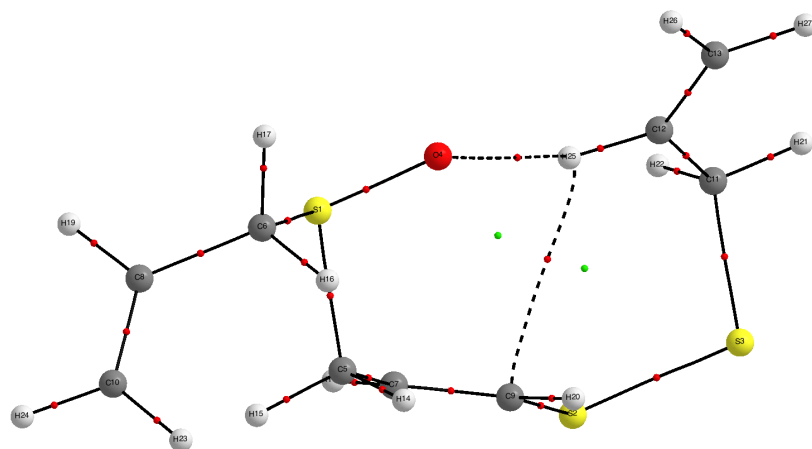

**Figure S425.** Ajoene\_(E)\_conformer\_89

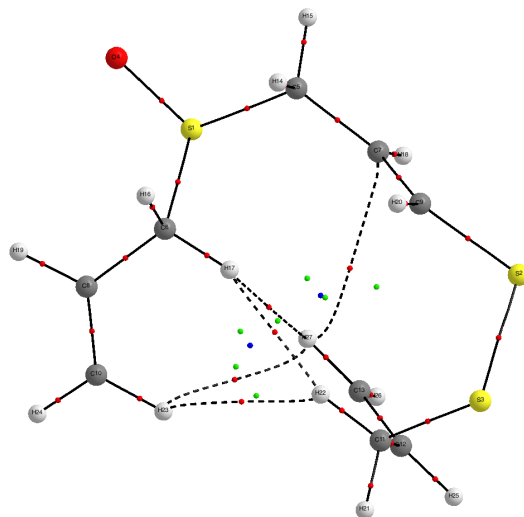

**Figure S426.** Ajoene\_(E)\_conformer\_90

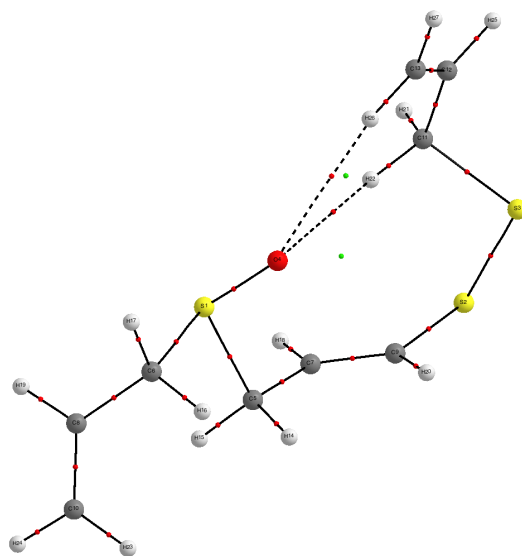

**Figure S427.** Ajoene\_(E)\_conformer\_91

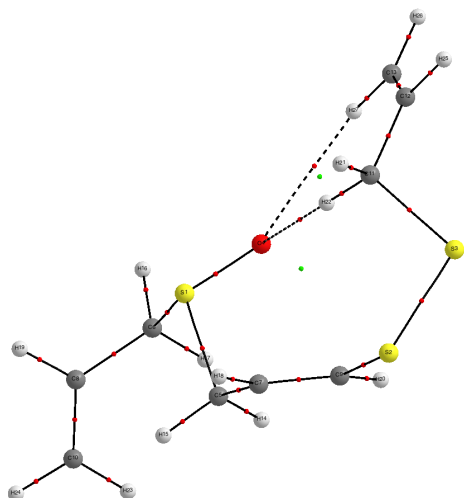

**Figure S428.** Ajoene\_(E)\_conformer\_92

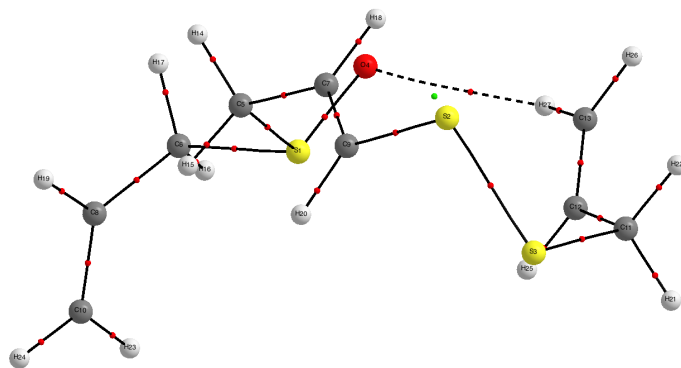

**Figure S429.** Ajoene\_(E)\_conformer\_93

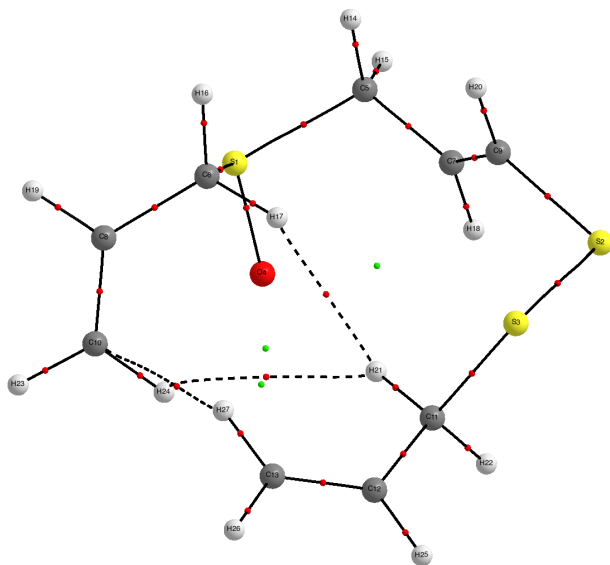

**Figure S430.** Ajoene\_(E)\_conformer\_94

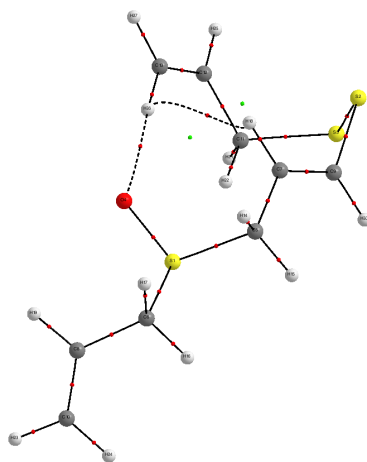

**Figure S431.** Ajoene\_(E)\_conformer\_95

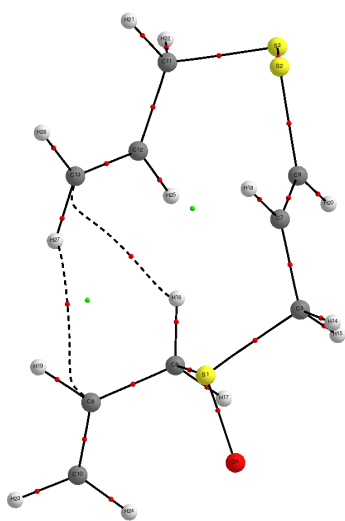

**Figure S432.** Ajoene\_(E)\_conformer\_96

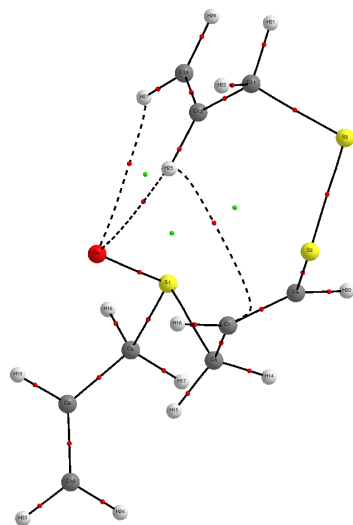

**Figure S433.** Ajoene\_(E)\_conformer\_97

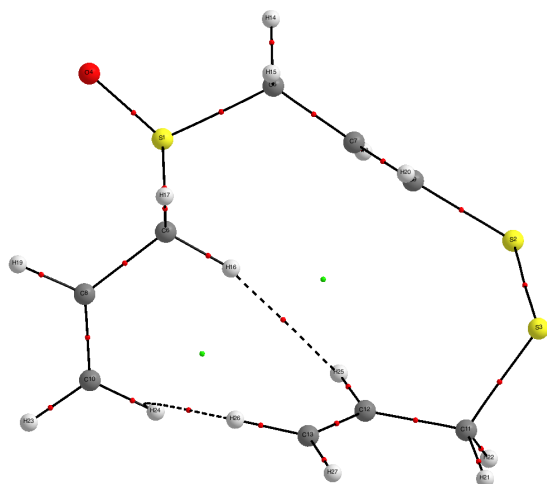

**Figure S434.** Ajoene\_(E)\_conformer\_98

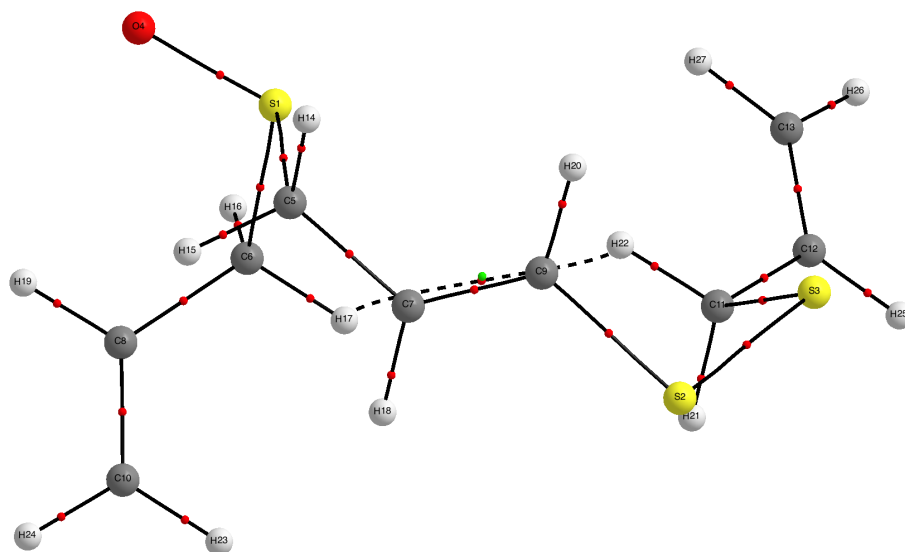

**Figure S435.** Ajoene\_(E)\_conformer\_99



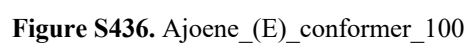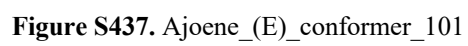

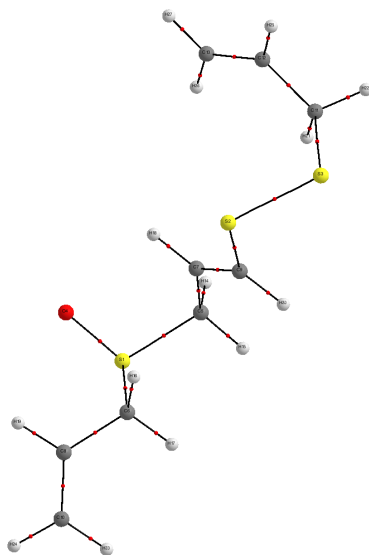

**Figure S438.** Ajoene\_(E)\_conformer\_102

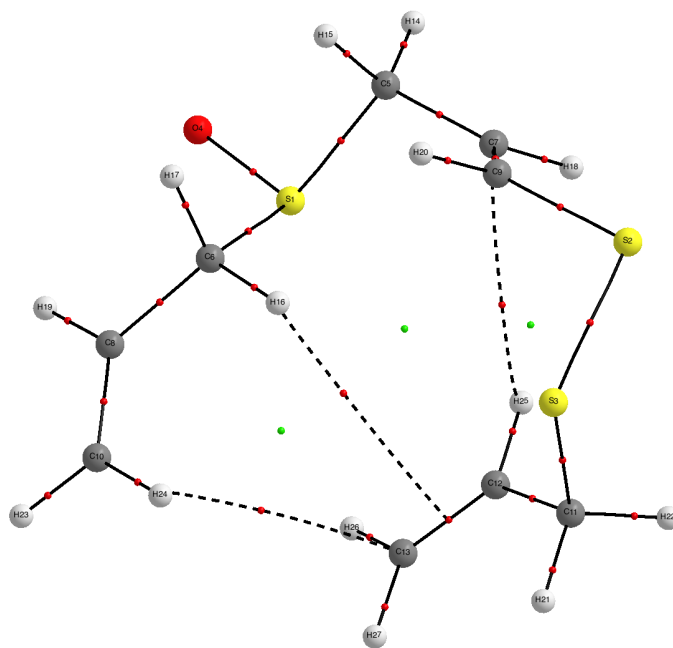

**Figure S439.** Ajoene\_(E)\_conformer\_103

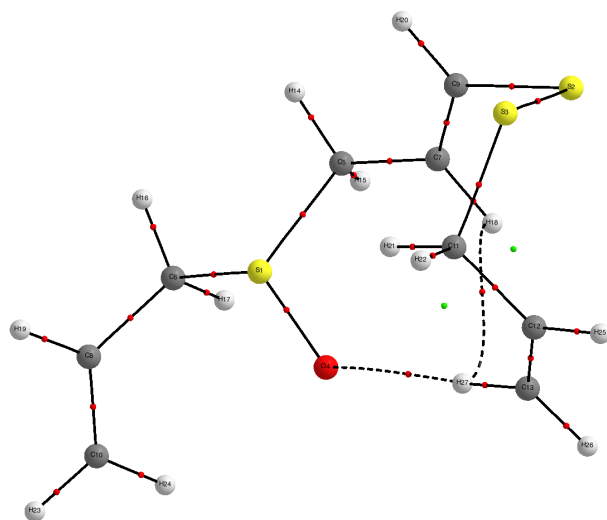

**Figure S440.** Ajoene\_(E)\_conformer\_104

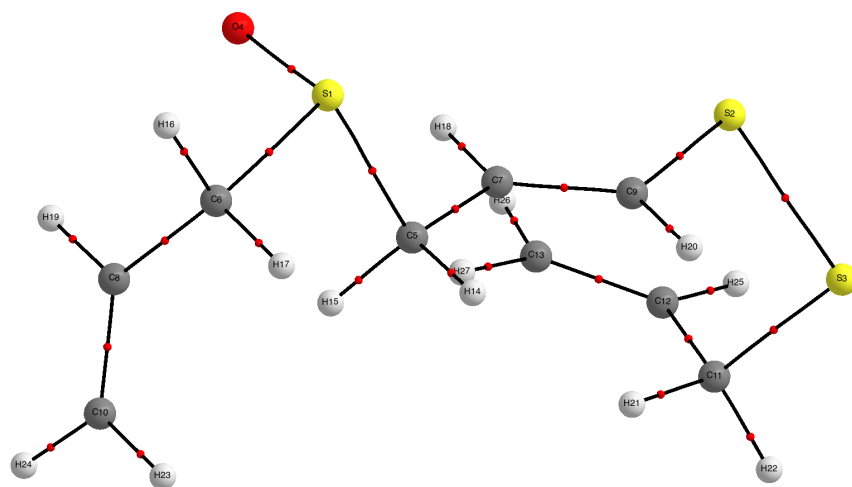

**Figure S441.** Ajoene\_(E)\_conformer\_105

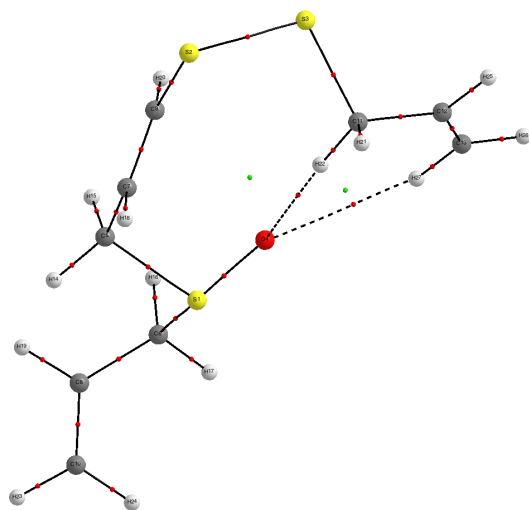

**Figure S442.** Ajoene\_(E)\_conformer\_106

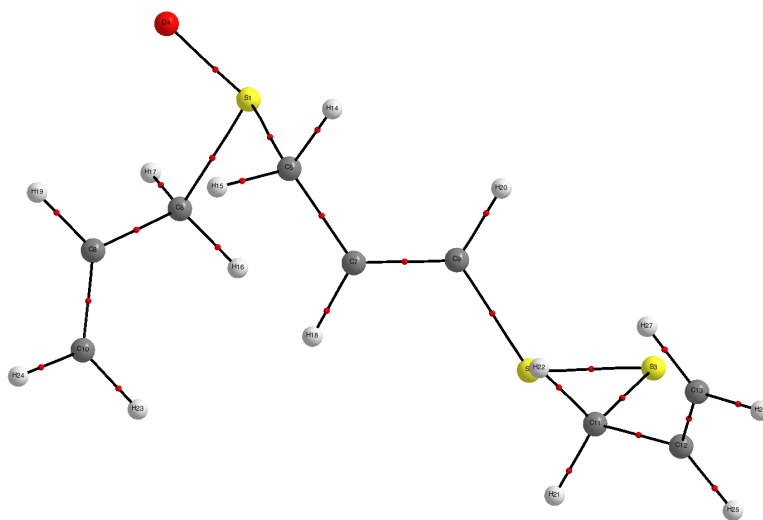

**Figure S443.** Ajoene\_(E)\_conformer\_107

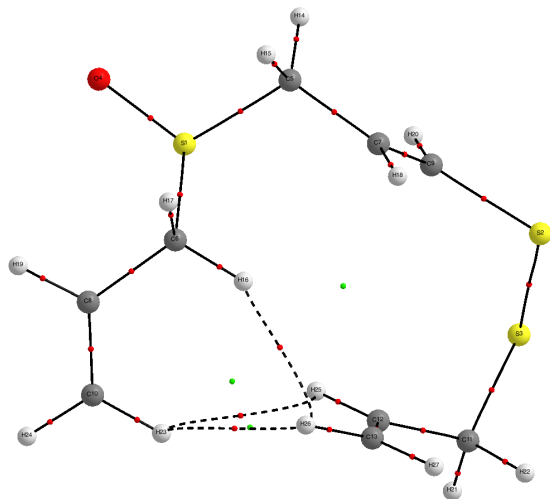

**Figure S444.** Ajoene\_(E)\_conformer\_108

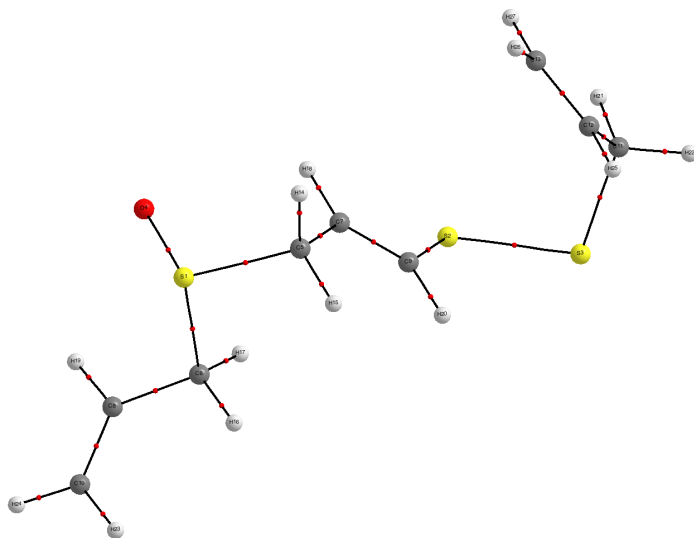

**Figure S445.** Ajoene\_(E)\_conformer\_109

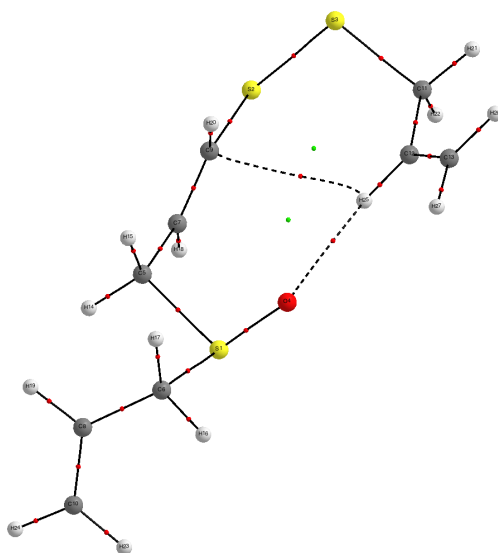

**Figure S446.** Ajoene\_(E)\_conformer\_110

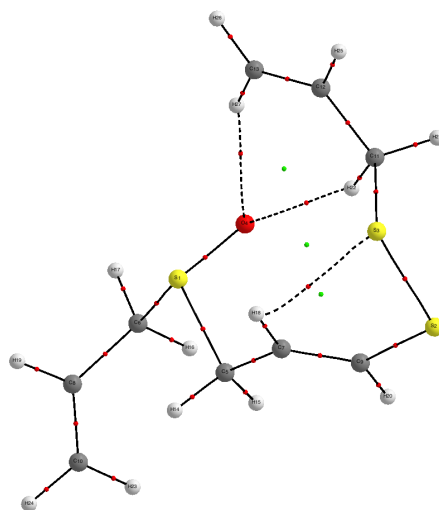

**Figure S447.** Ajoene\_(E)\_conformer\_111

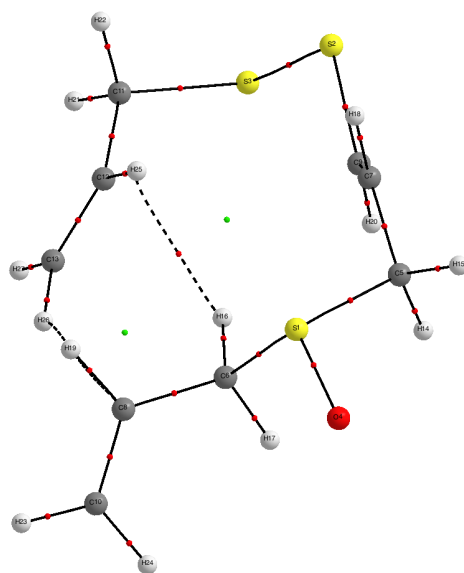

**Figure S448.** Ajoene\_(E)\_conformer\_112

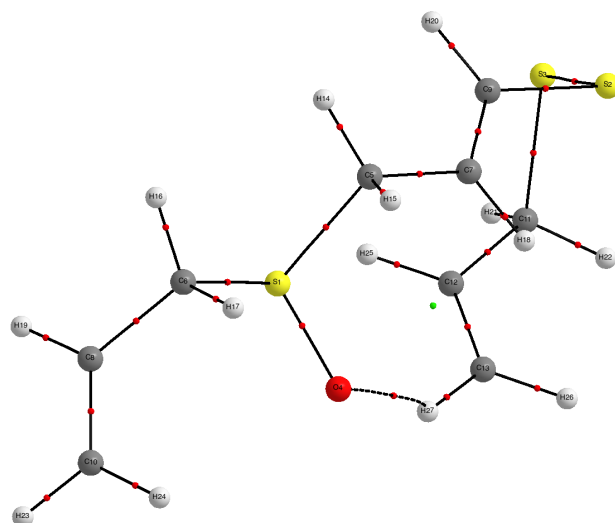

**Figure S449.** Ajoene\_(E)\_conformer\_113

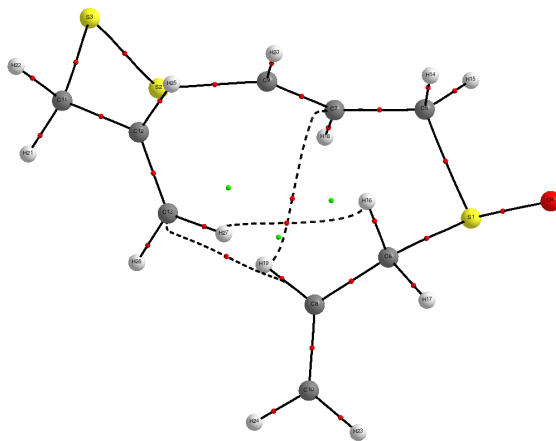

**Figure S450.** Ajoene\_(E)\_conformer\_114

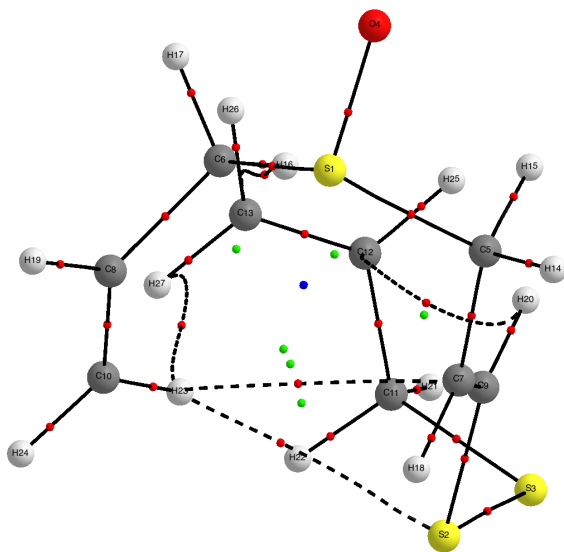

**Figure S451.** Ajoene\_(E)\_conformer\_115



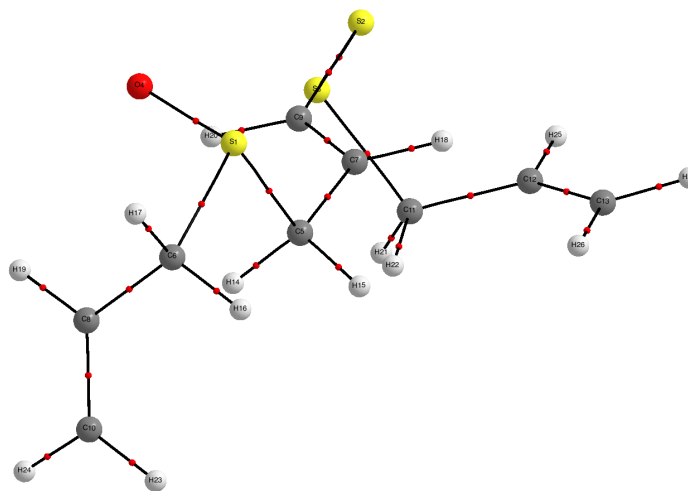

**Figure S452.** Ajoene\_(E)\_conformer\_116

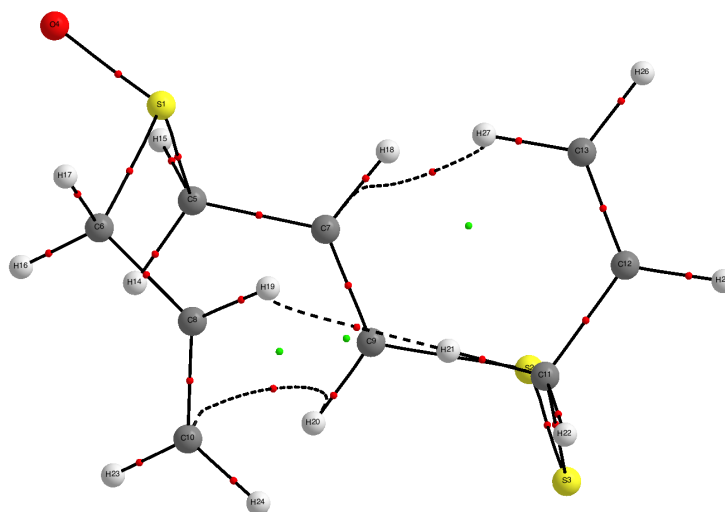

**Figure S453.** Ajoene\_(E)\_conformer\_117

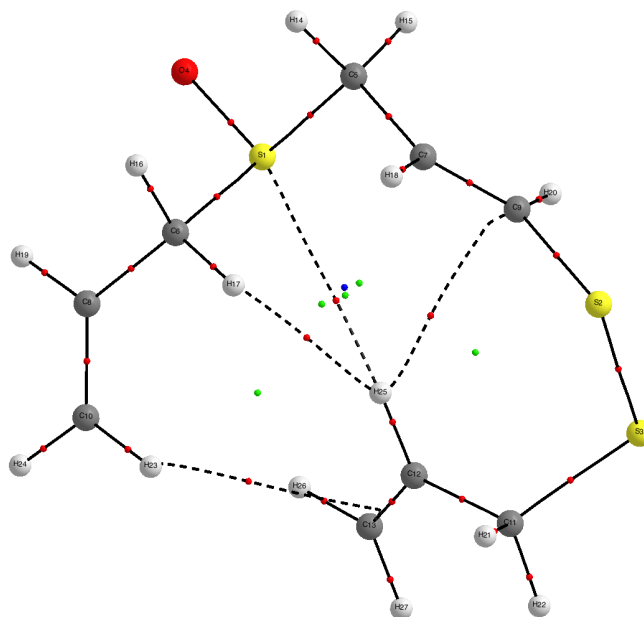

**Figure S454.** Ajoene\_(E)\_conformer\_118

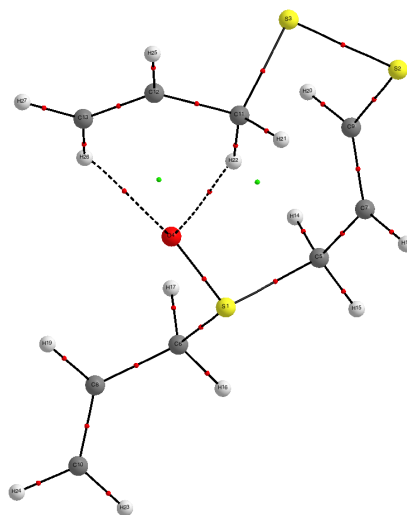

**Figure S455.** Ajoene\_(E)\_conformer\_119

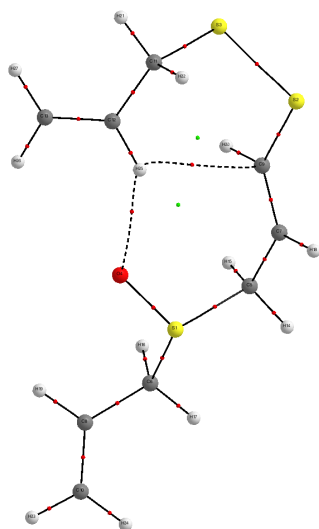

**Figure S456.** Ajoene\_(E)\_conformer\_120

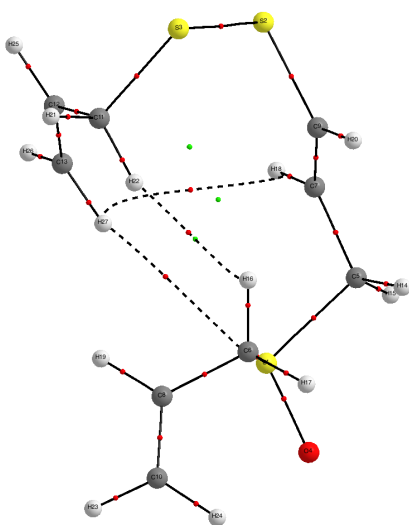

**Figure S457.** Ajoene\_(E)\_conformer\_121

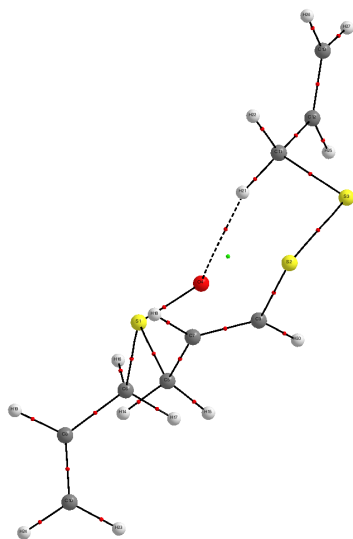

**Figure S458.** Ajoene\_(E)\_conformer\_122

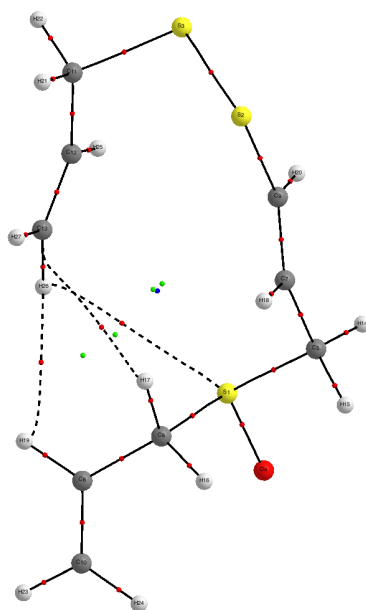

**Figure S459.** Ajoene\_(E)\_conformer\_123

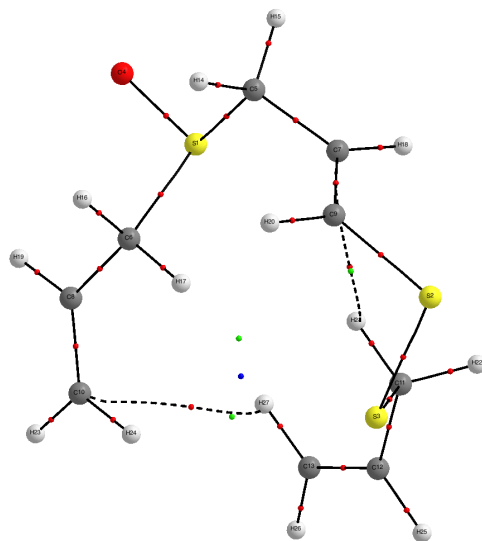

**Figure S460.** Ajoene\_(E)\_conformer\_124

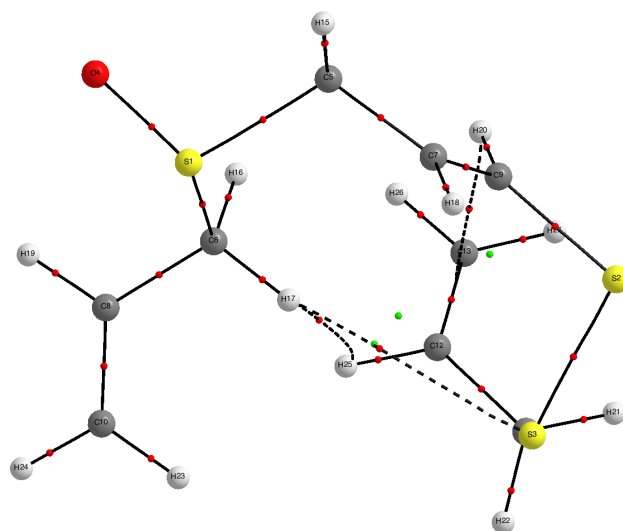

**Figure S461.** Ajoene\_(E)\_conformer\_125

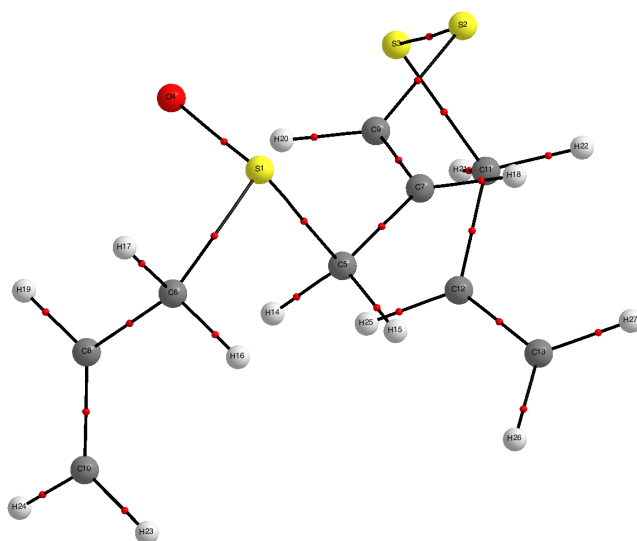

**Figure S462.** Ajoene\_(E)\_conformer\_126

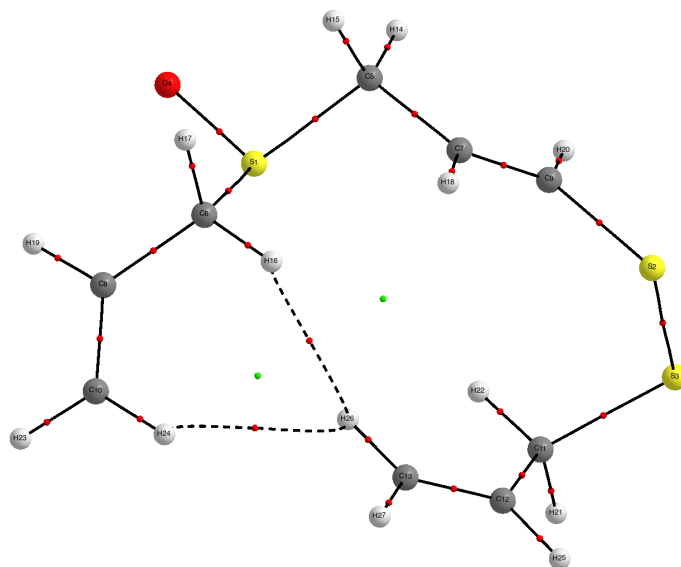

**Figure S463.** Ajoene\_(E)\_conformer\_127

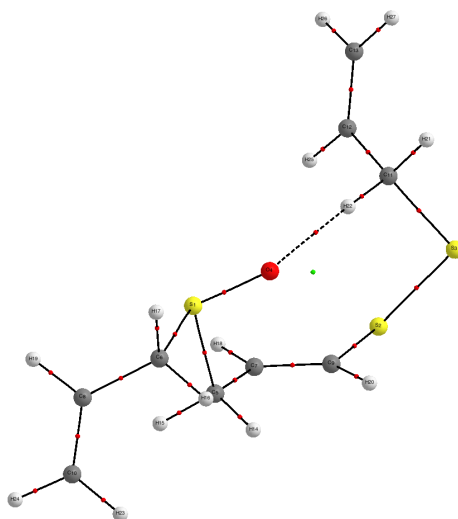

**Figure S464.** Ajoene\_(E)\_conformer\_128

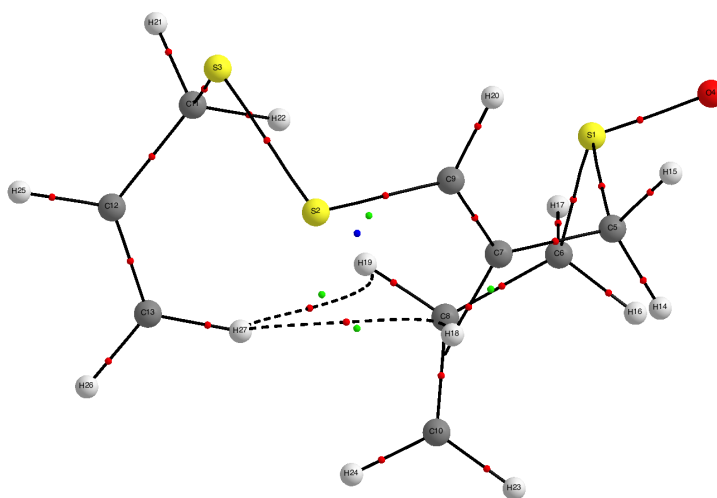

**Figure S465.** Ajoene\_(E)\_conformer\_129

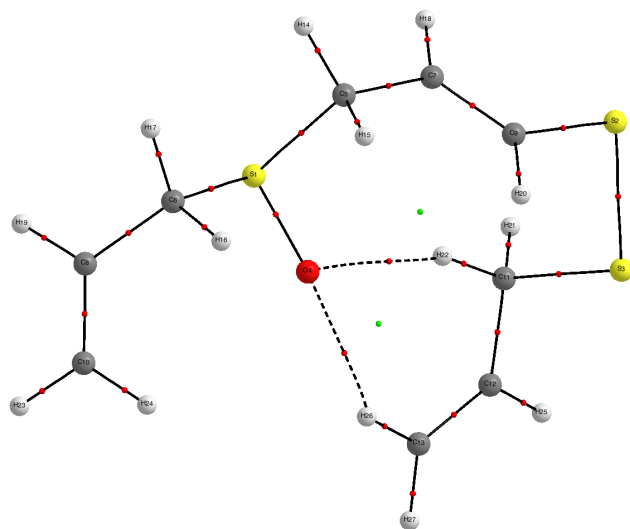

**Figure S466.** Ajoene\_(E)\_conformer\_130

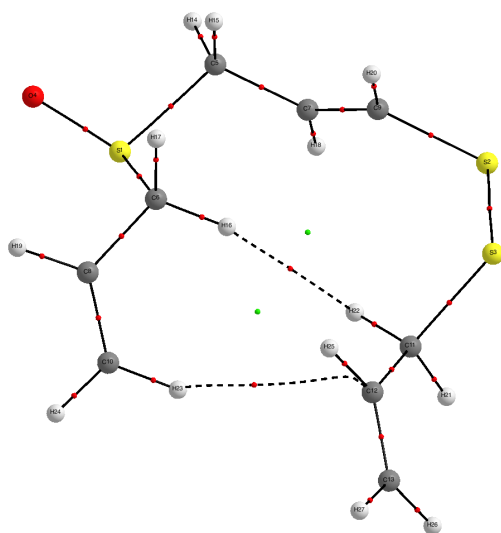

**Figure S467.** Ajoene\_(E)\_conformer\_131



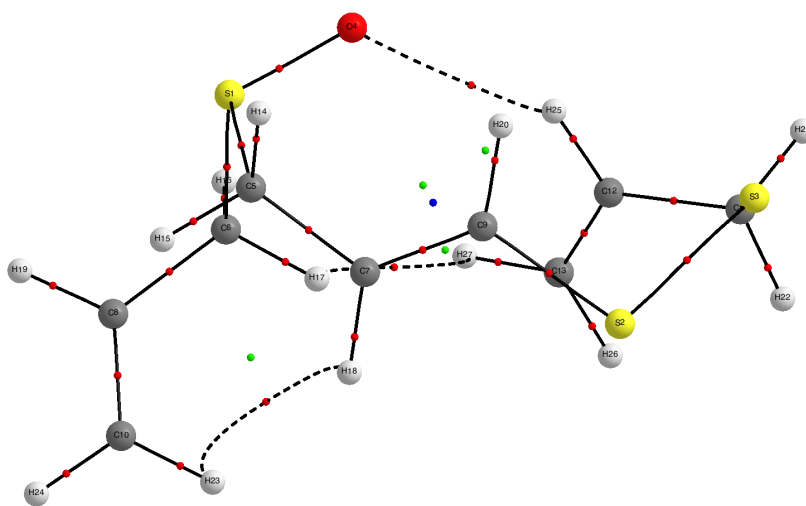

**Figure S468.** Ajoene\_(E)\_conformer\_132

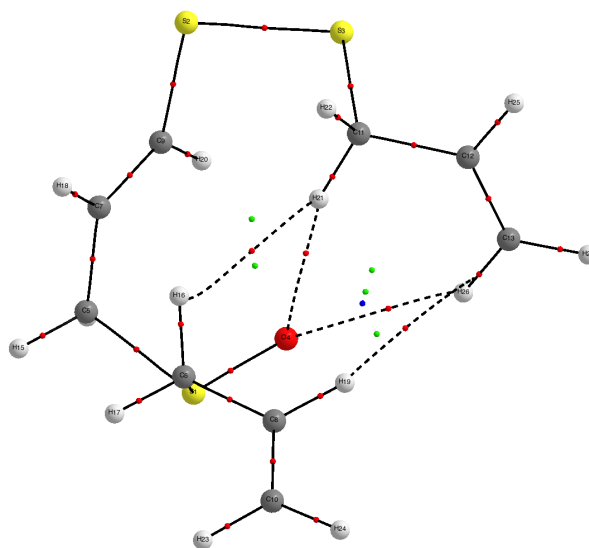

**Figure S469.** Ajoene\_(E)\_conformer\_133

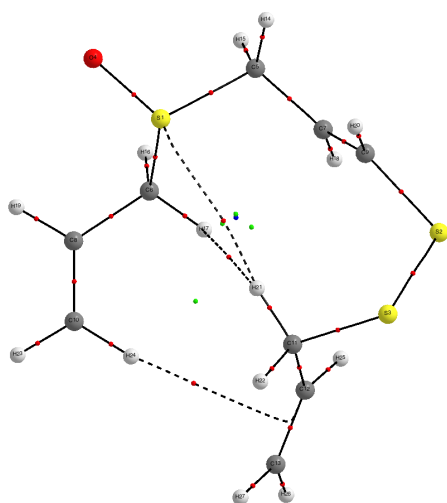

**Figure S470.** Ajoene\_(E)\_conformer\_134

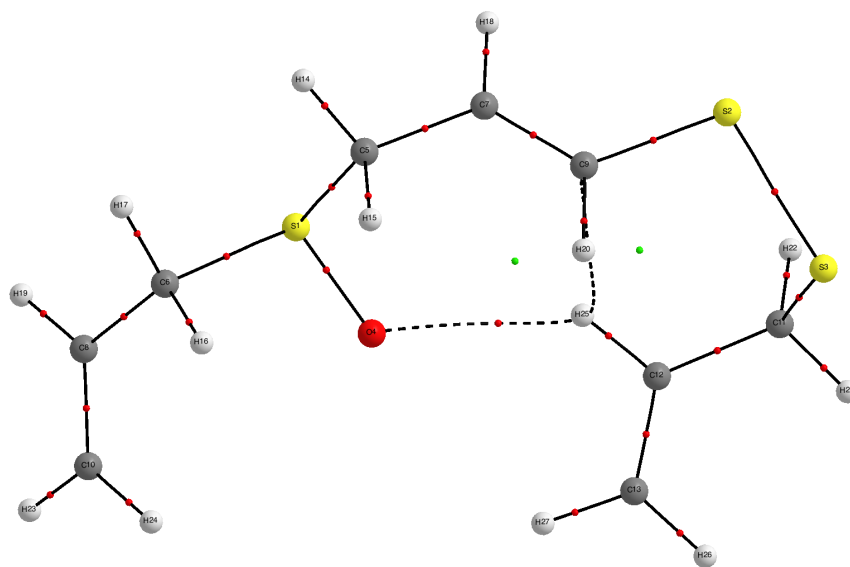

**Figure S471.** Ajoene\_(E)\_conformer\_135

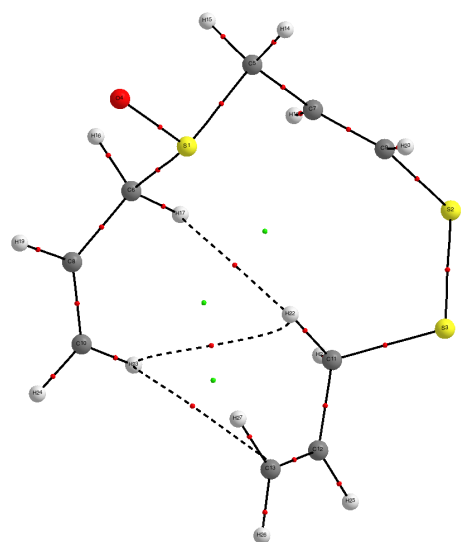

**Figure S472.** Ajoene\_(E)\_conformer\_136

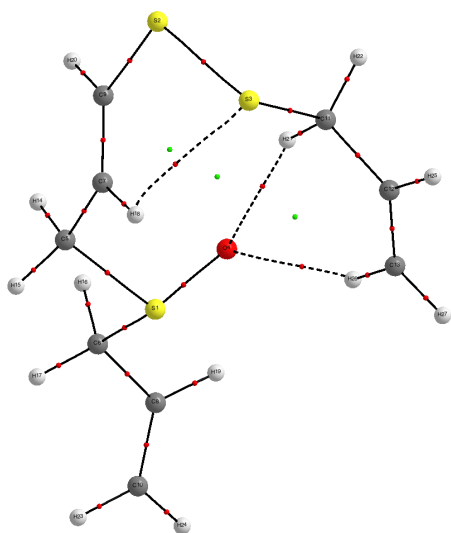

**Figure S473.** Ajoene\_(E)\_conformer\_137

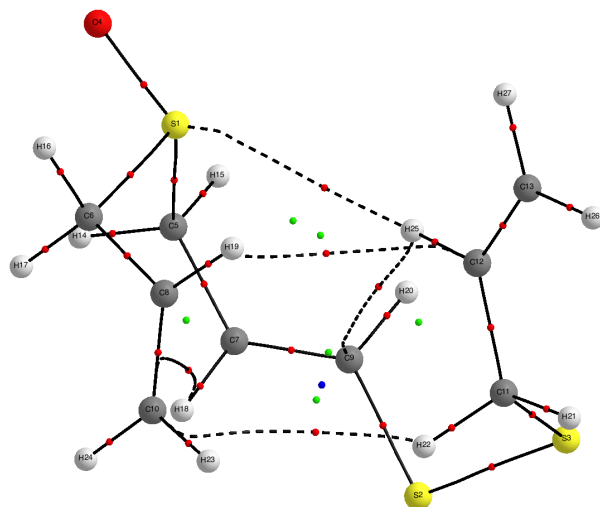

**Figure S474.** Ajoene\_(E)\_conformer\_138

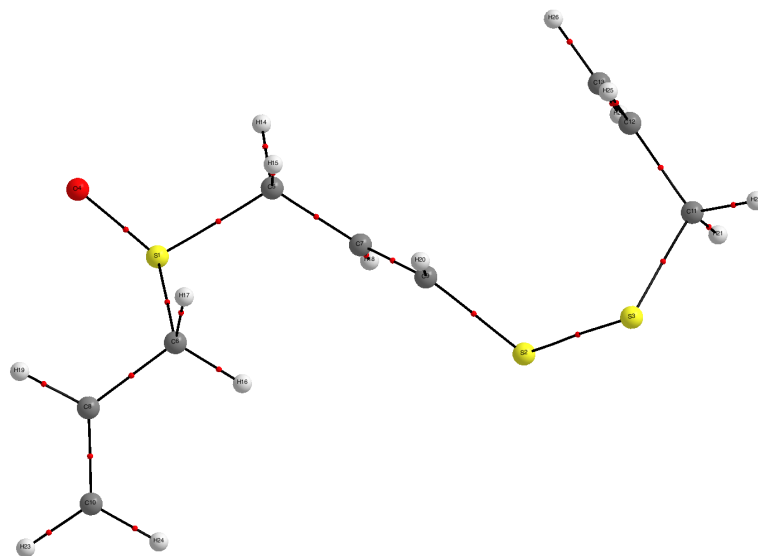

**Figure S475.** Ajoene\_(E)\_conformer\_139

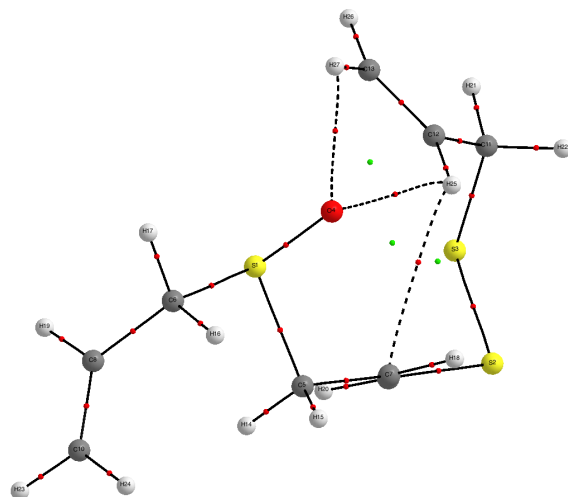

**Figure S476.** Ajoene\_(E)\_conformer\_140

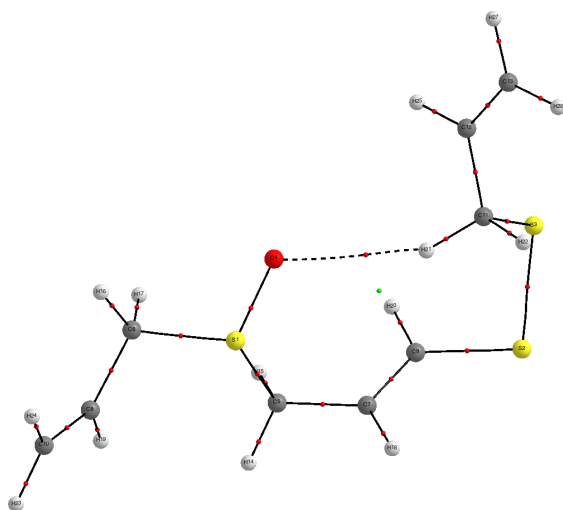

**Figure S477.** Ajoene\_(E)\_conformer\_141

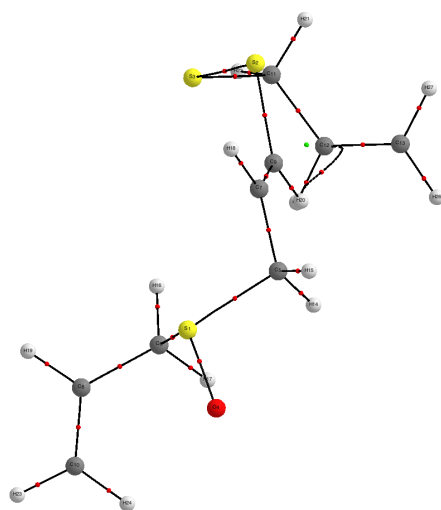

**Figure S478.** Ajoene\_(E)\_conformer\_142

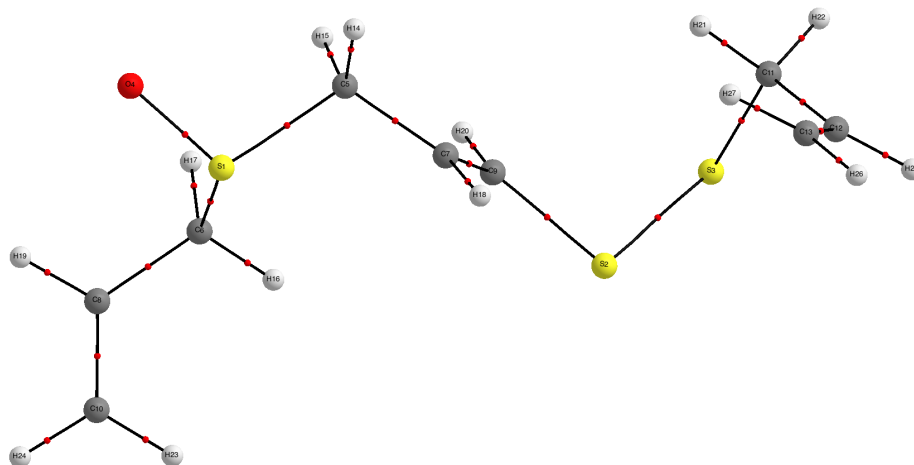

**Figure S479.** Ajoene\_(E)\_conformer\_143

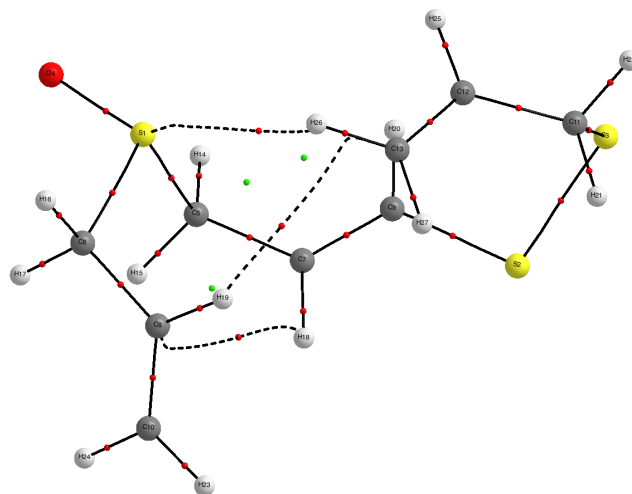

**Figure S480.** Ajoene\_(E)\_conformer\_144

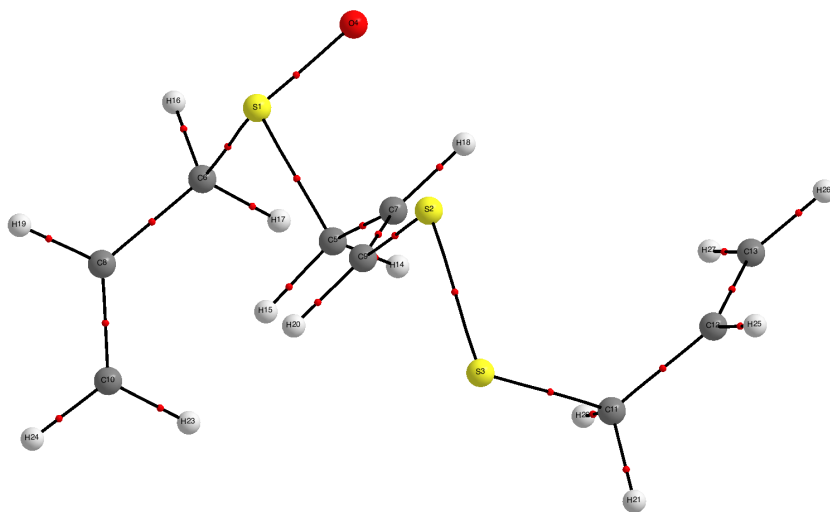

**Figure S481.** Ajoene\_(E)\_conformer\_145

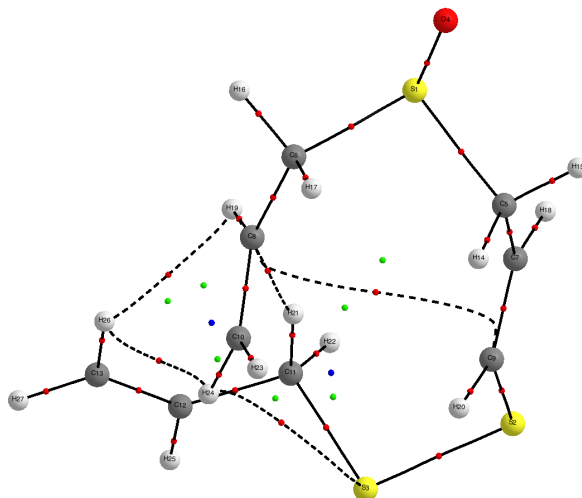

**Figure S482.** Ajoene\_(E)\_conformer\_146

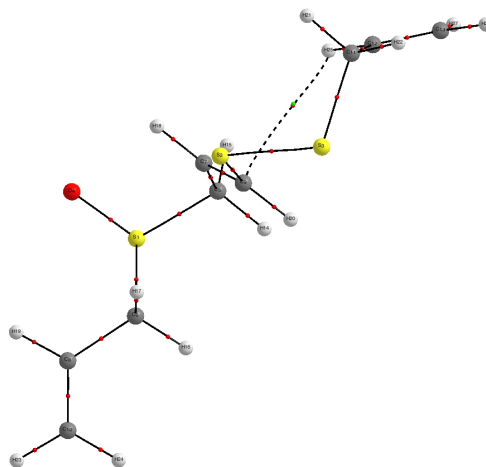

**Figure S483.** Ajoene\_(E)\_conformer\_147



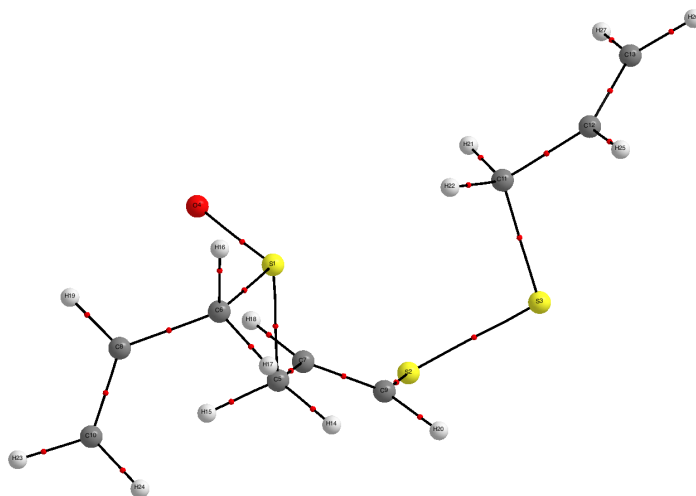

**Figure S484.** Ajoene\_(E)\_conformer\_148

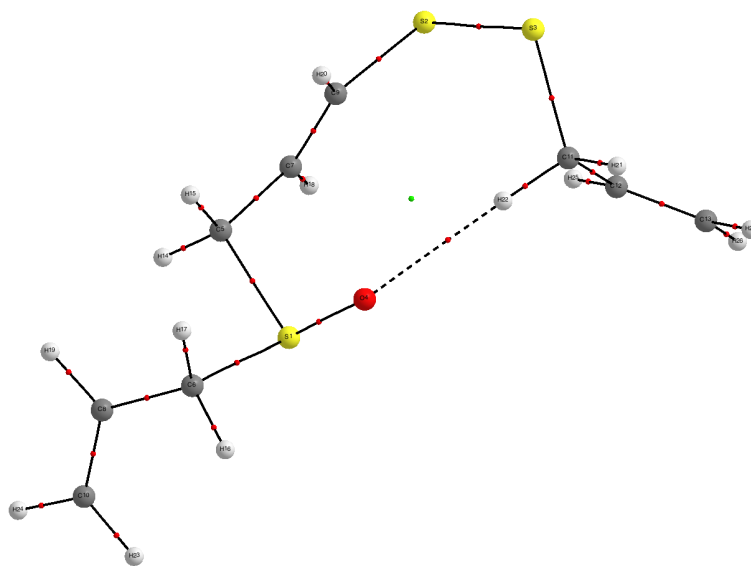

**Figure S485.** Ajoene\_(E)\_conformer\_149

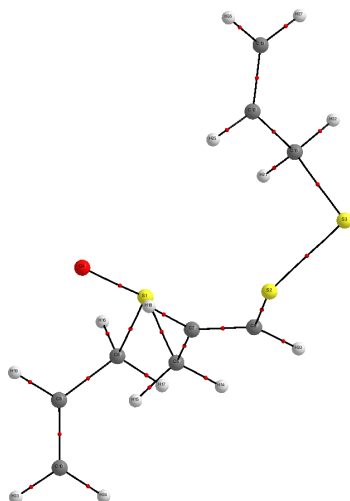

**Figure S486.** Ajoene\_(E)\_conformer\_150

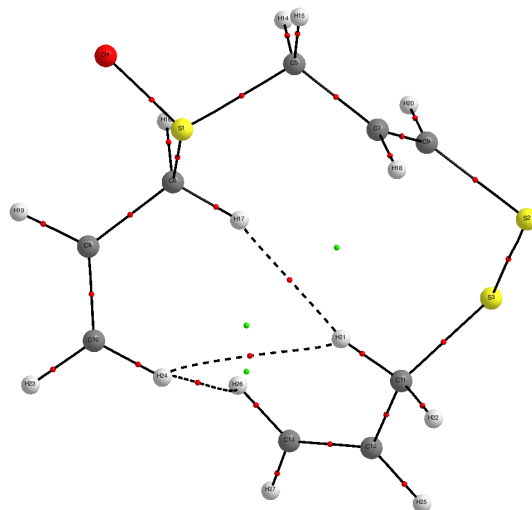

**Figure S487.** Ajoene\_(E)\_conformer\_151

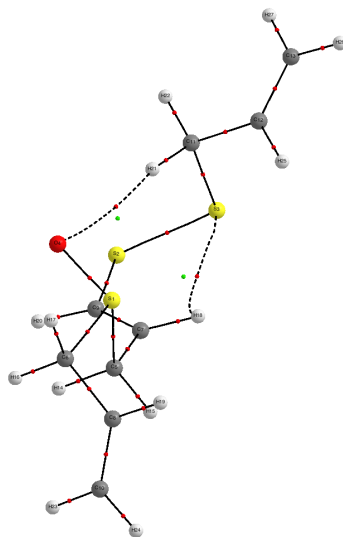

**Figure S488.** Ajoene\_(E)\_conformer\_152

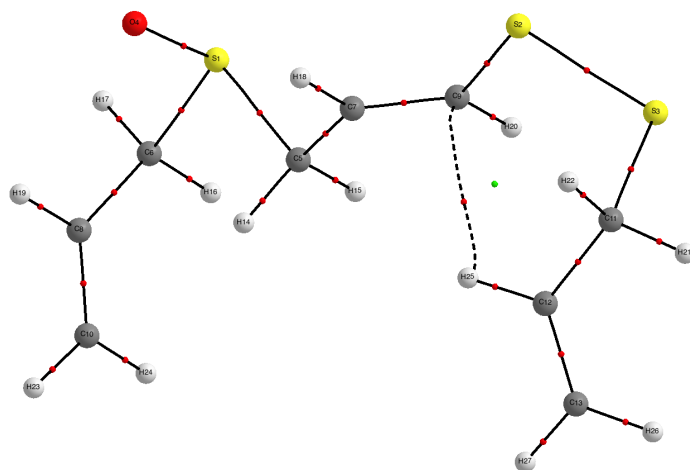

**Figure S489.** Ajoene\_(E)\_conformer\_153

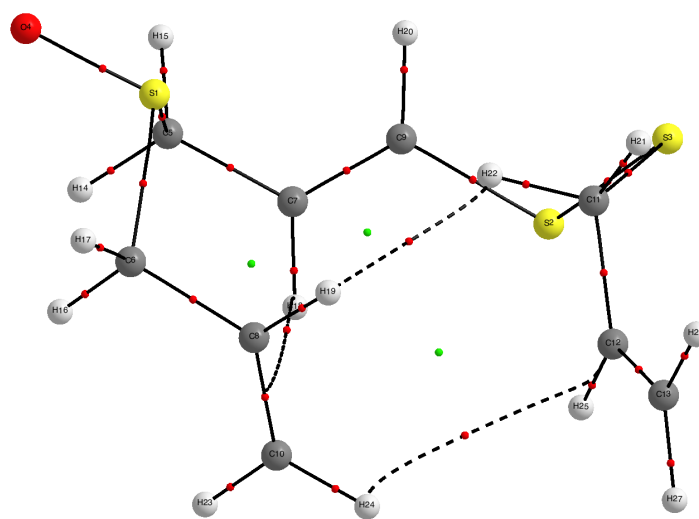

**Figure S490.** Ajoene\_(E)\_conformer\_154

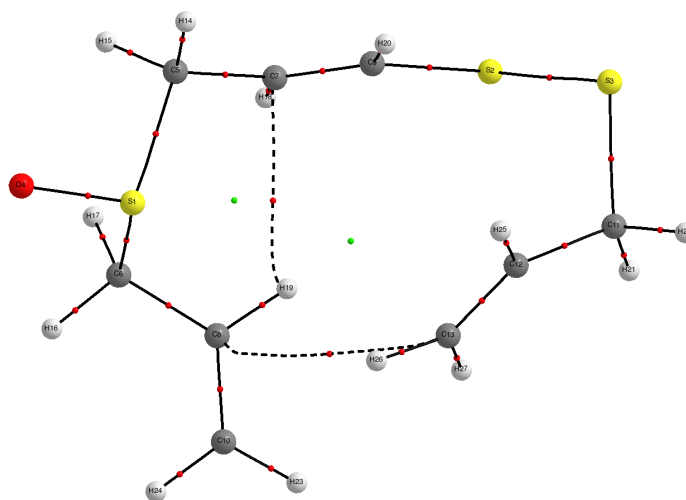

**Figure S491.** Ajoene\_(E)\_conformer\_155

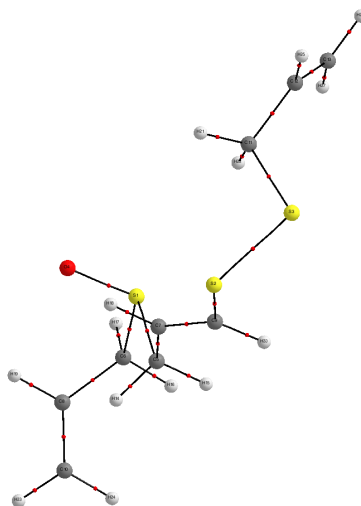

**Figure S492.** Ajoene\_(E)\_conformer\_156

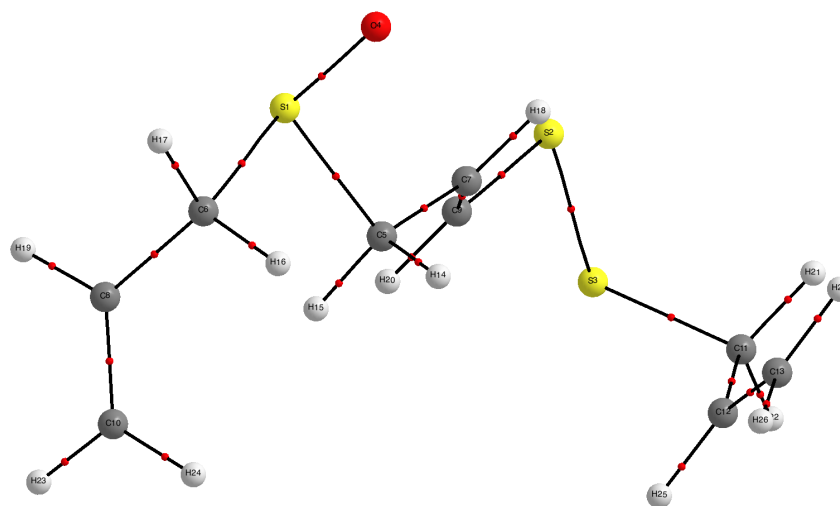

**Figure S493.** Ajoene\_(E)\_conformer\_157

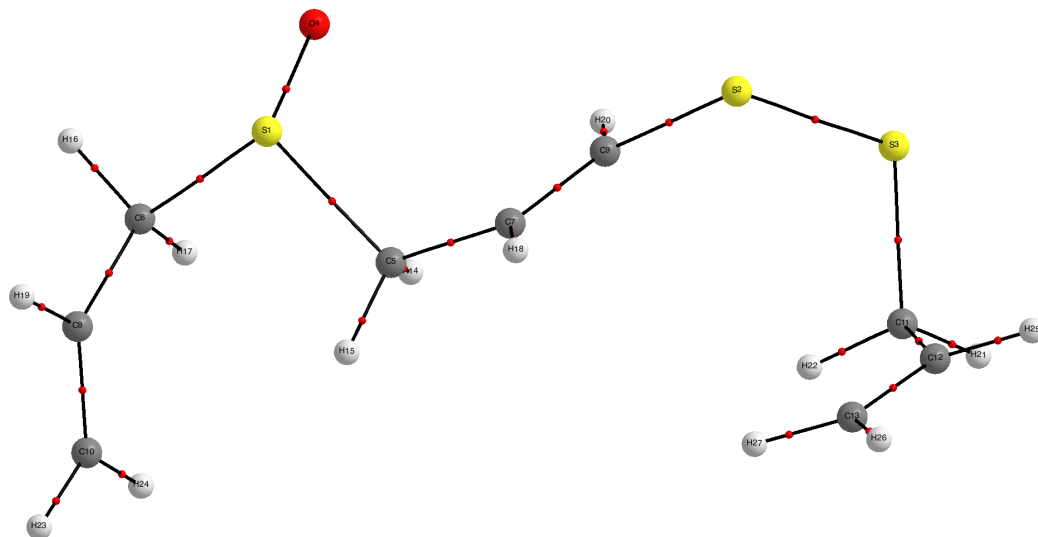

**Figure S494.** Ajoene\_(E)\_conformer\_158

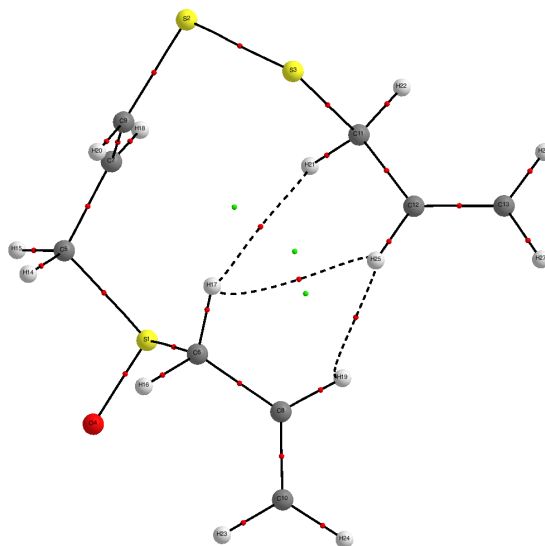

**Figure S495.** Ajoene\_(E)\_conformer\_159

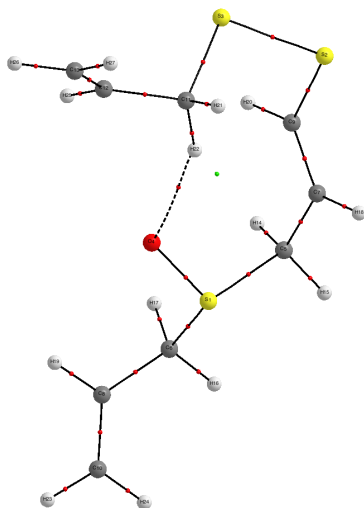

**Figure S496.** Ajoene\_(E)\_conformer\_160

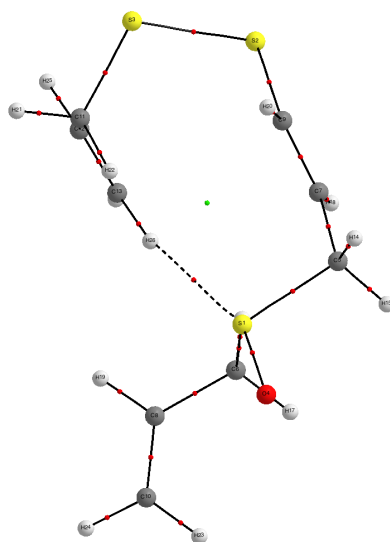

**Figure S497.** Ajoene\_(E)\_conformer\_161

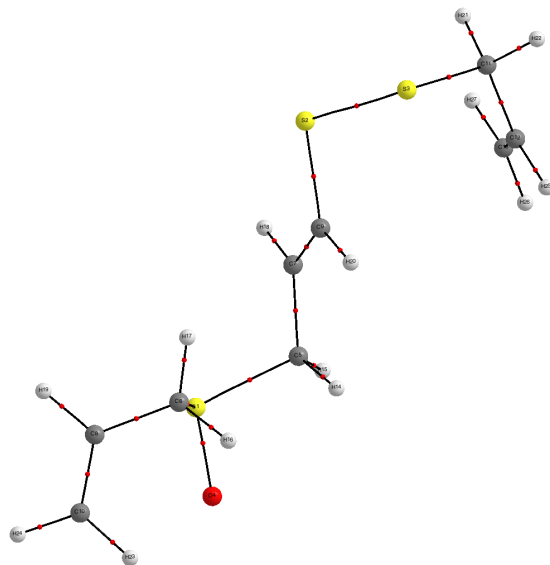

**Figure S498.** Ajoene\_(E)\_conformer\_162

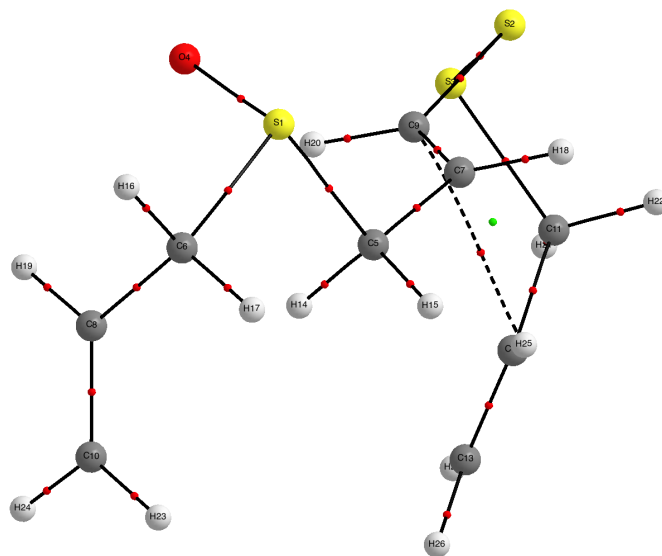

**Figure S499.** Ajoene\_(E)\_conformer\_163



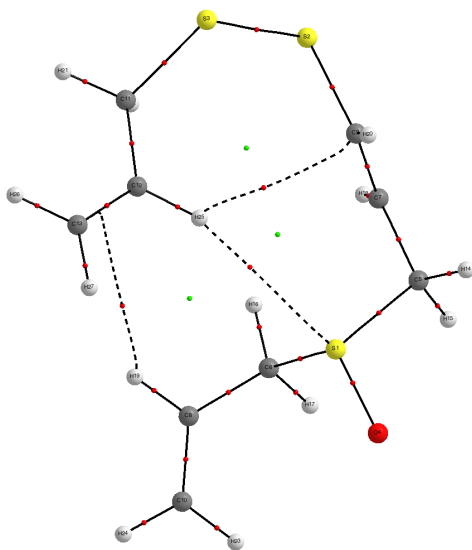

**Figure S500.** Ajoene\_(E)\_conformer\_164

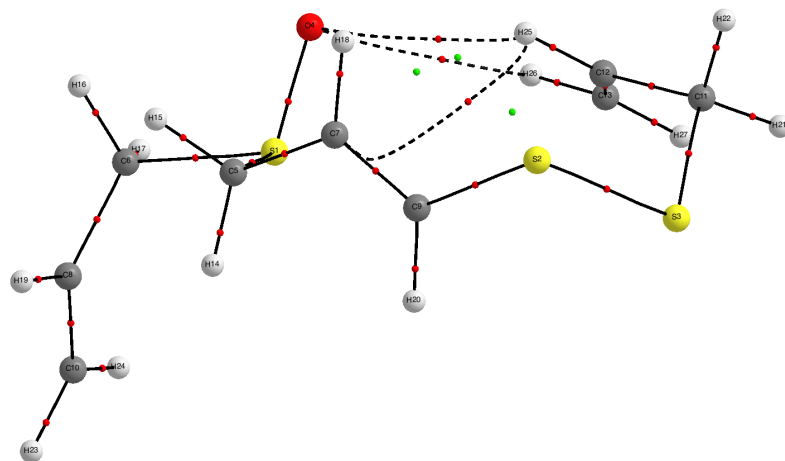

**Figure S501.** Ajoene\_(E)\_conformer\_165

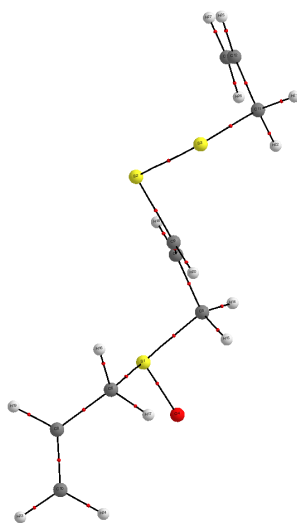

**Figure S502.** Ajoene\_(E)\_conformer\_166

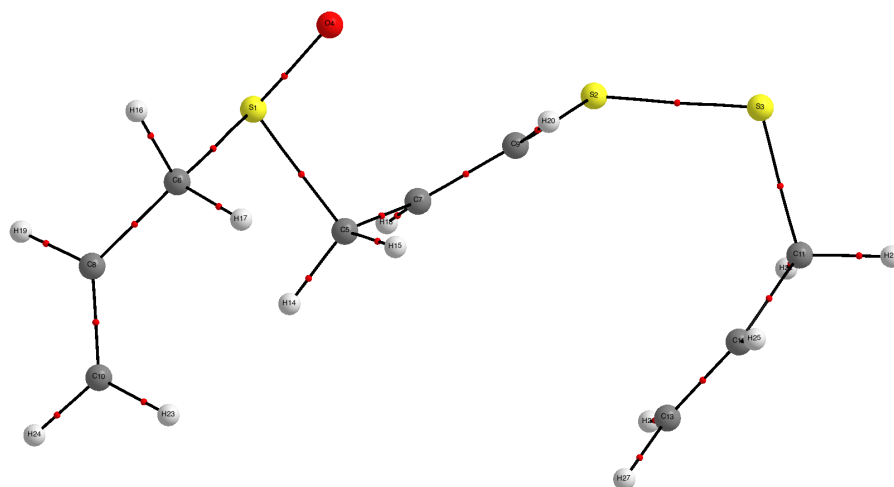

**Figure S503.** Ajoene\_(E)\_conformer\_167

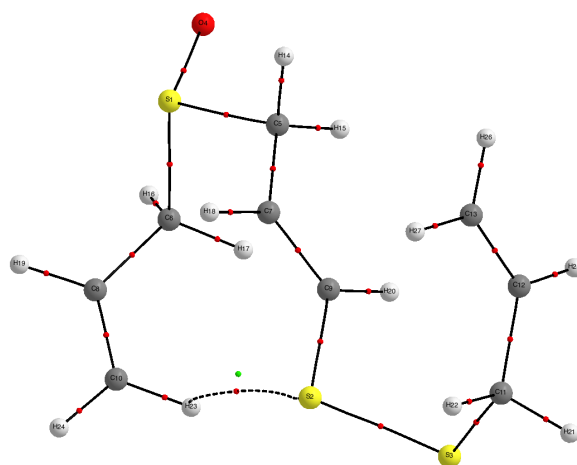

**Figure S504.** Ajoene\_(E)\_conformer\_168

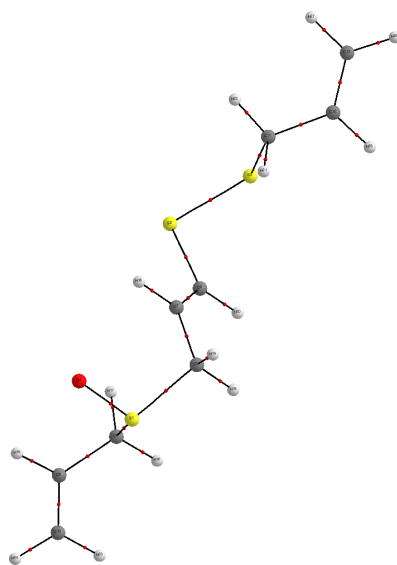

**Figure S505.** Ajoene\_(E)\_conformer\_169

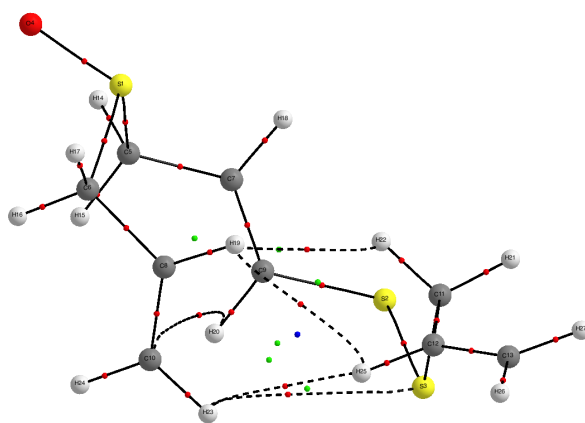

**Figure S506.** Ajoene\_(E)\_conformer\_170

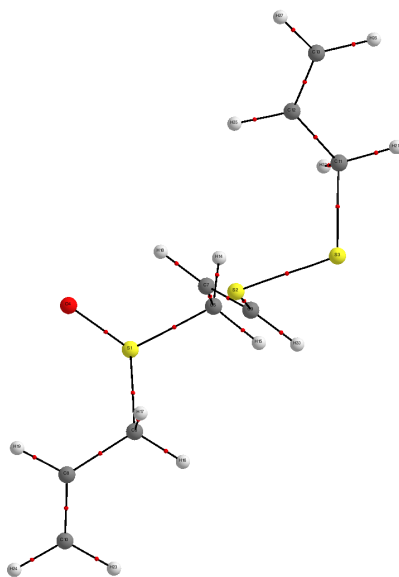

**Figure S507.** Ajoene\_(E)\_conformer\_171

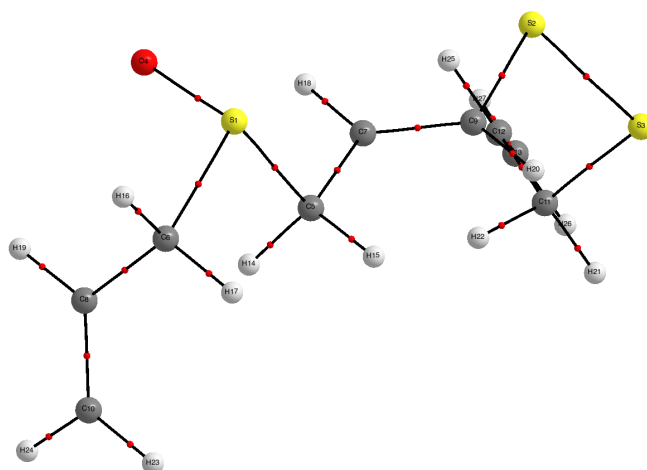

**Figure S508.** Ajoene\_(E)\_conformer\_172

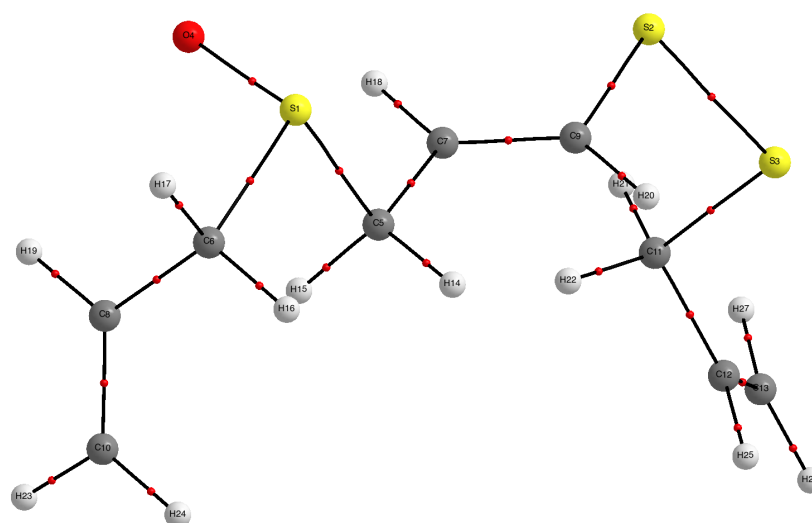

**Figure S509.** Ajoene\_(E)\_conformer\_173

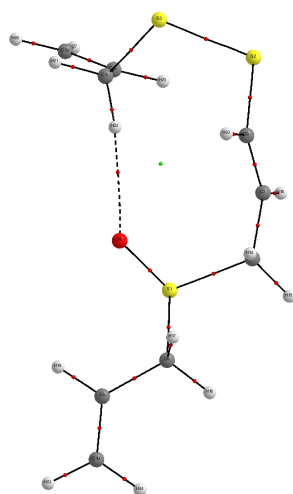

**Figure S510.** Ajoene\_(E)\_conformer\_174

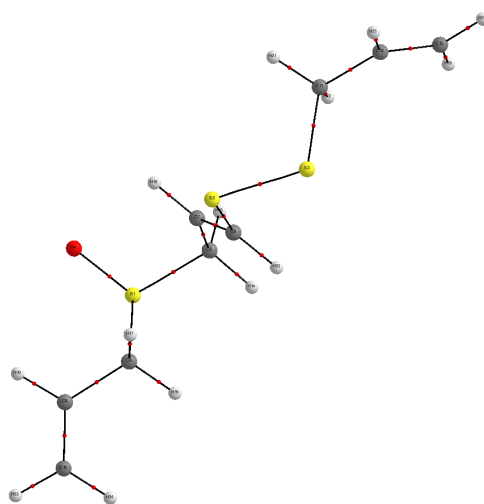

**Figure S511.** Ajoene\_(E)\_conformer\_175

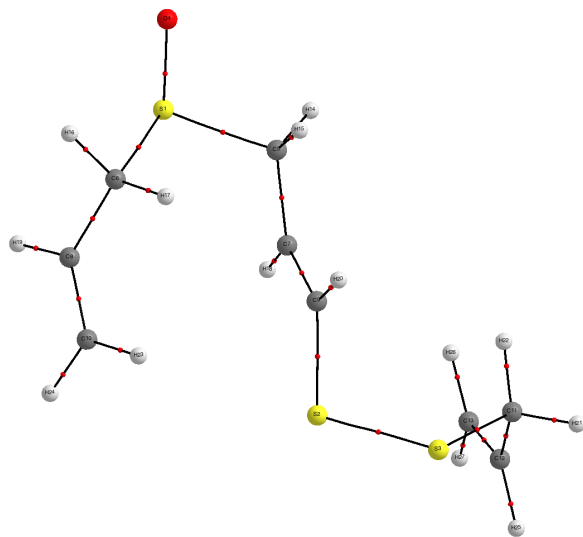

**Figure S512.** Ajoene\_(E)\_conformer\_176

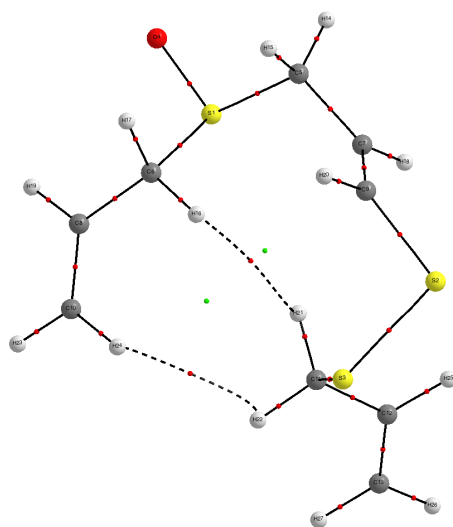

**Figure S513.** Ajoene\_(E)\_conformer\_177

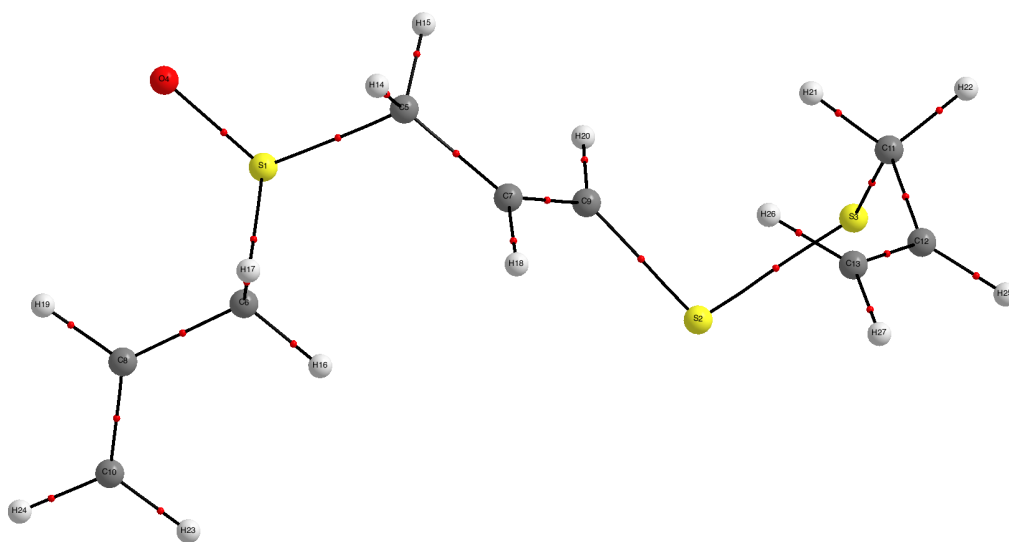

**Figure S514.** Ajoene\_(E)\_conformer\_178

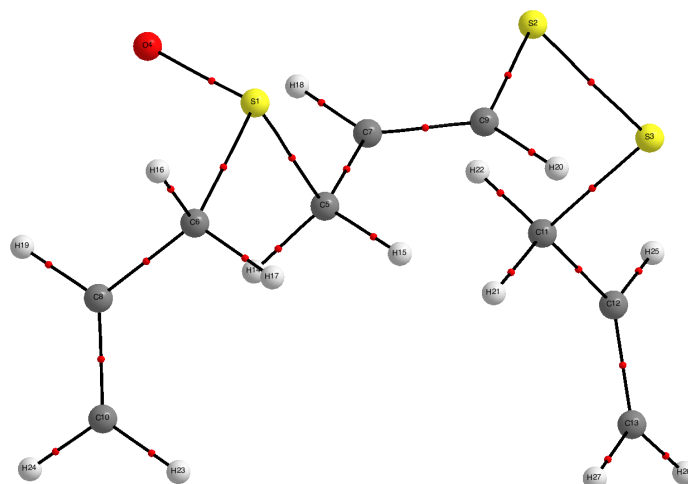

**Figure S515.** Ajoene\_(E)\_conformer\_179



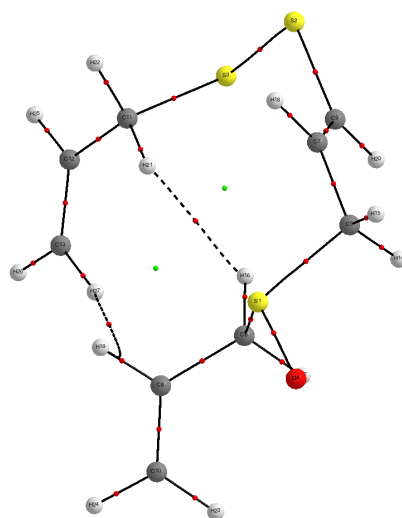

**Figure S516.** Ajoene\_(E)\_conformer\_180

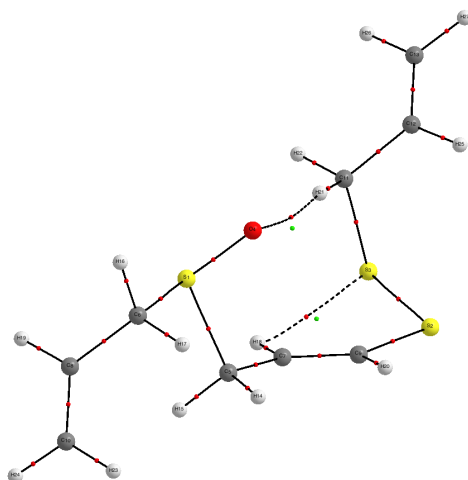

**Figure S517.** Ajoene\_(E)\_conformer\_181



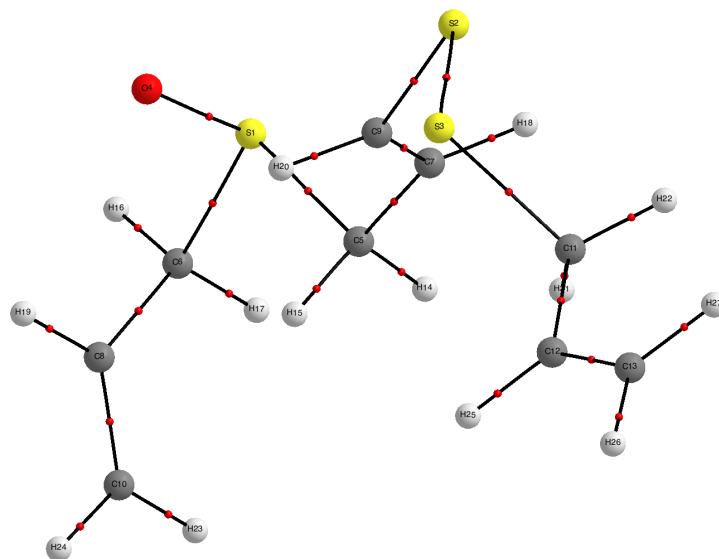

**Figure S520.** Ajoene\_(E)\_conformer\_184

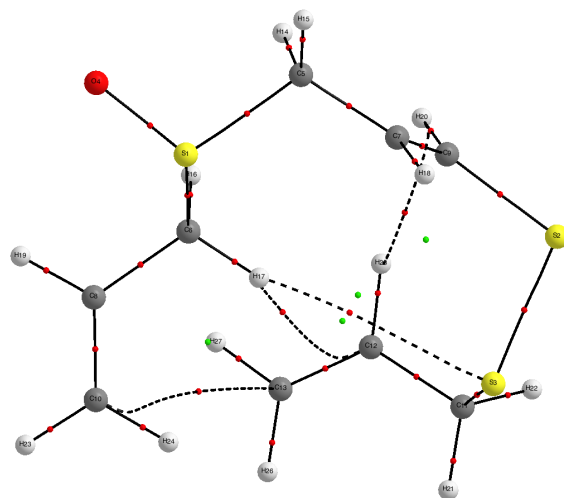

**Figure S521.** Ajoene\_(E)\_conformer\_185

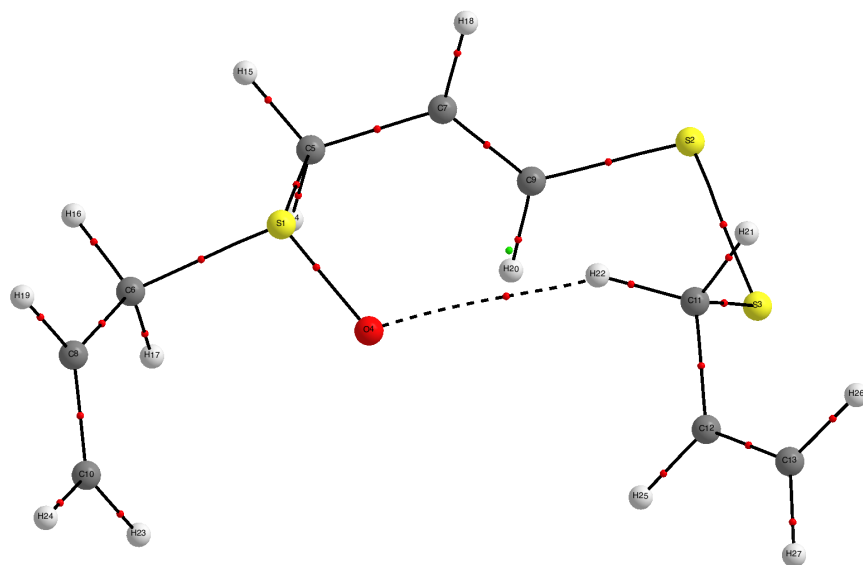

**Figure S522.** Ajoene\_(E)\_conformer\_186

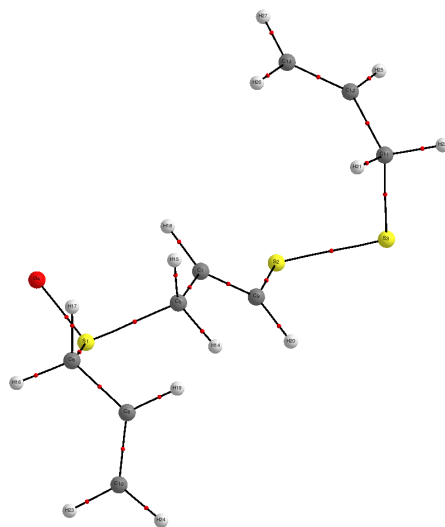

**Figure S523.** Ajoene\_(E)\_conformer\_187

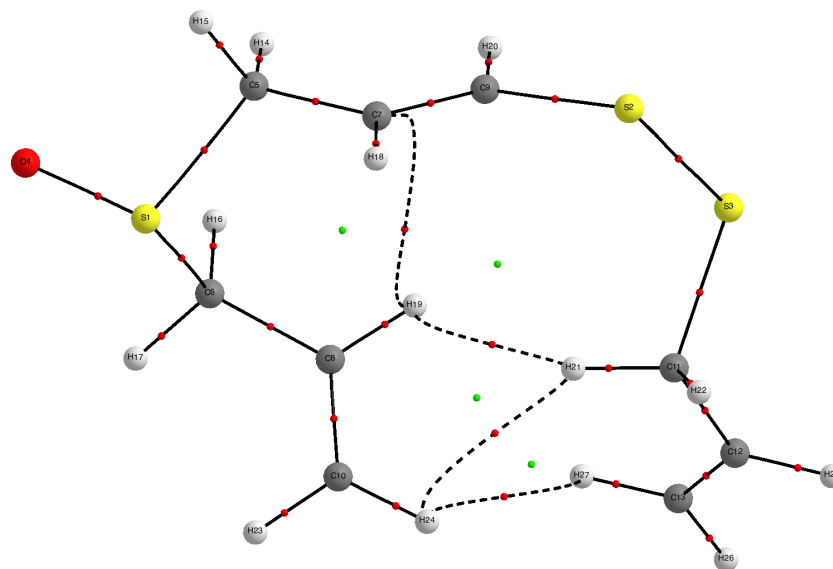

**Figure S524.** Ajoene\_(E)\_conformer\_188

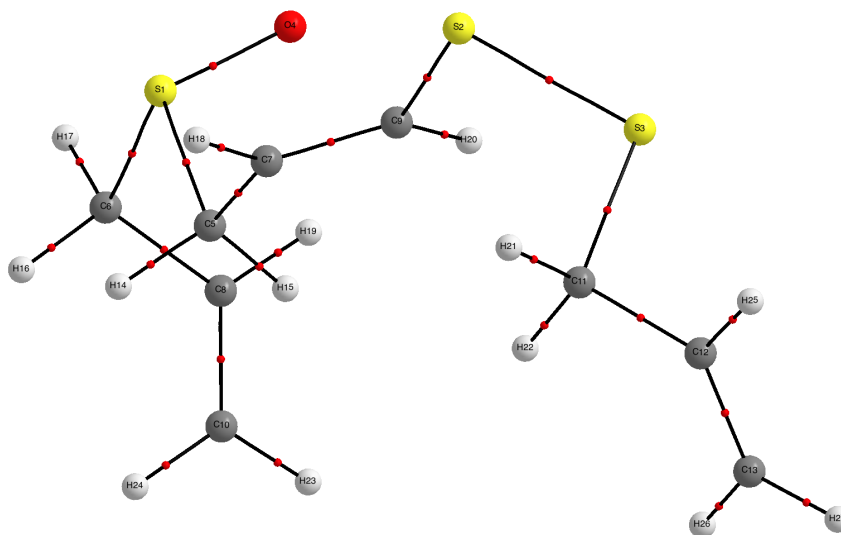

**Figure S525.** Ajoene\_(E)\_conformer\_189

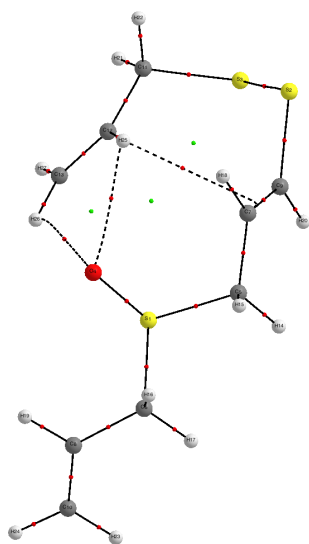

**Figure S526.** Ajoene\_(E)\_conformer\_190

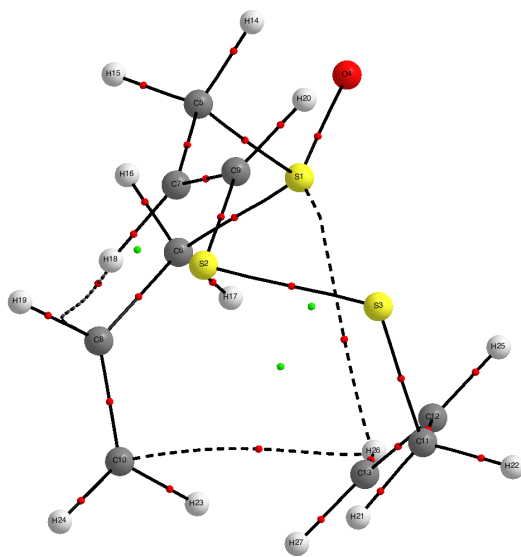

**Figure S527.** Ajoene\_(E)\_conformer\_191

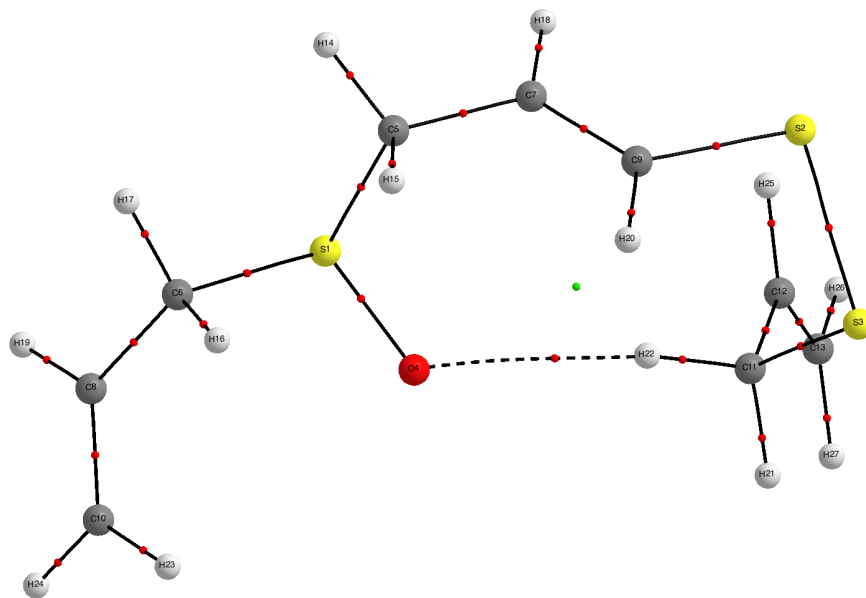

**Figure S528.** Ajoene\_(E)\_conformer\_192

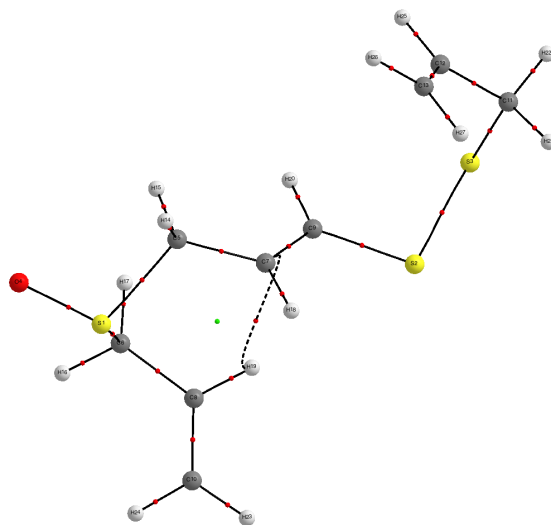

**Figure S529.** Ajoene\_(E)\_conformer\_193

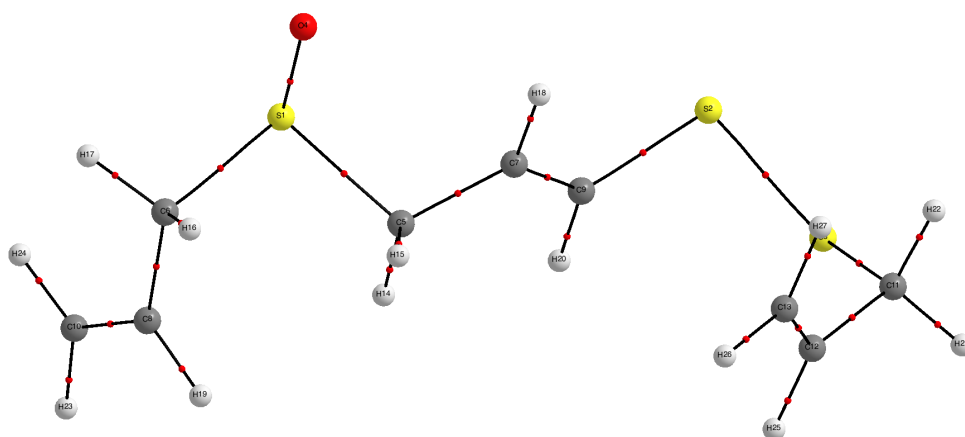

**Figure S530.** Ajoene\_(E)\_conformer\_194

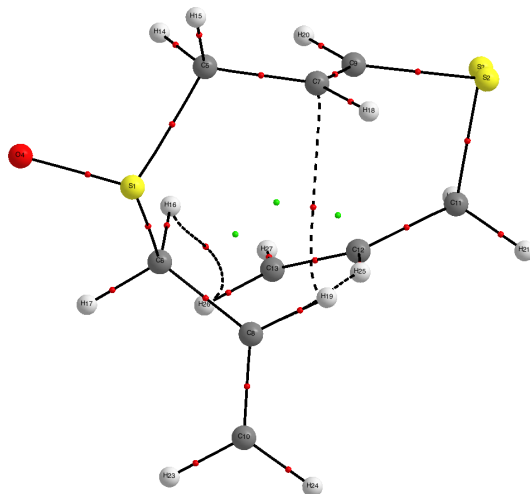

**Figure S531.** Ajoene\_(E)\_conformer\_195



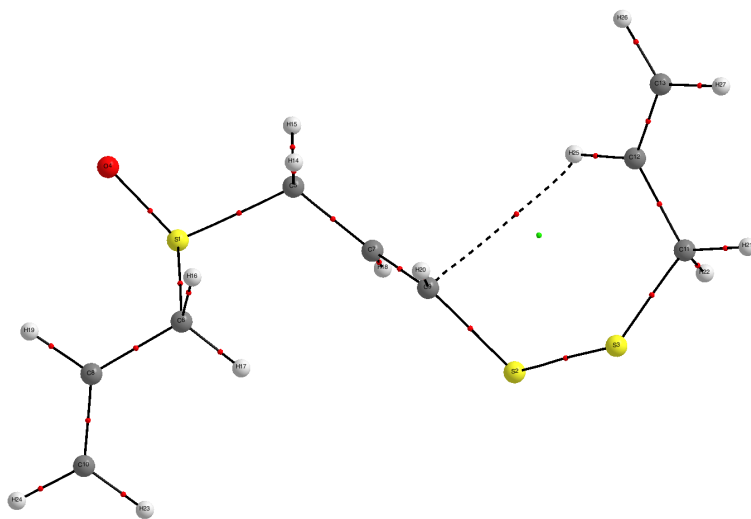

**Figure S532.** Ajoene\_(E)\_conformer\_196

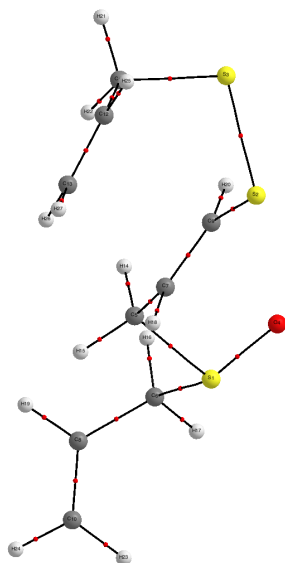

**Figure S533.** Ajoene\_(E)\_conformer\_197

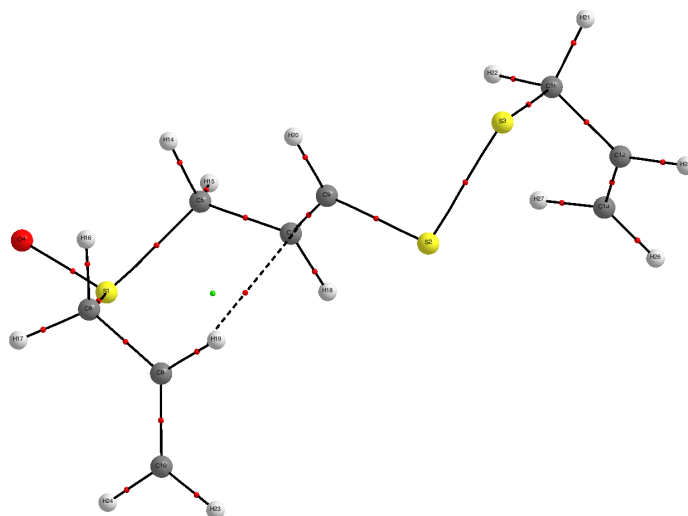

**Figure S534.** Ajoene\_(E)\_conformer\_198

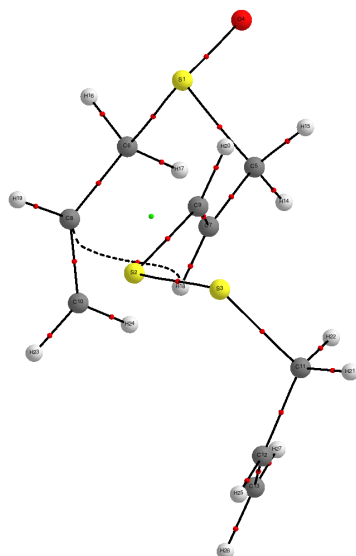

**Figure S535.** Ajoene\_(E)\_conformer\_199

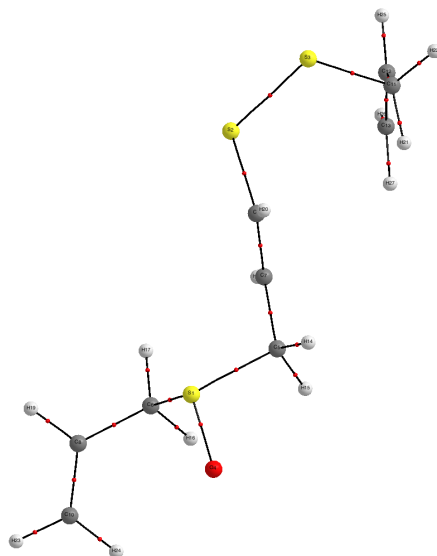

**Figure S536.** Ajoene\_(E)\_conformer\_200

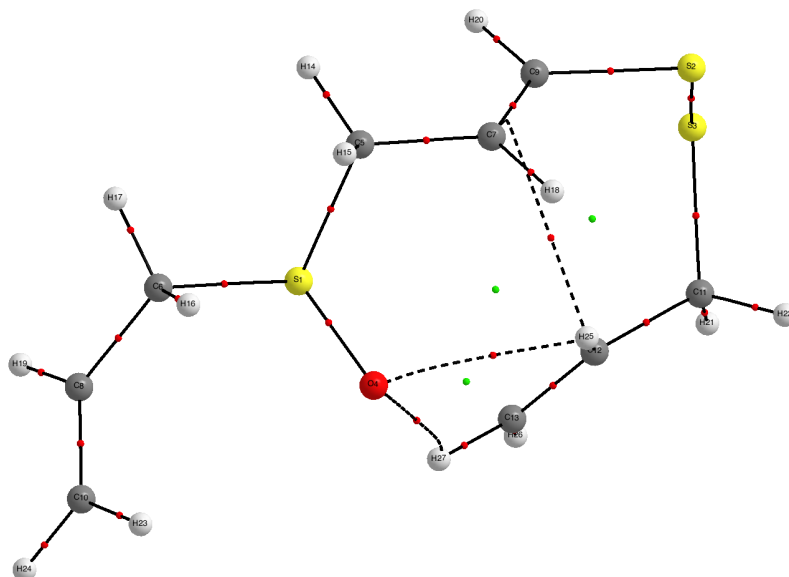

**Figure S537.** Ajoene\_(E)\_conformer\_201

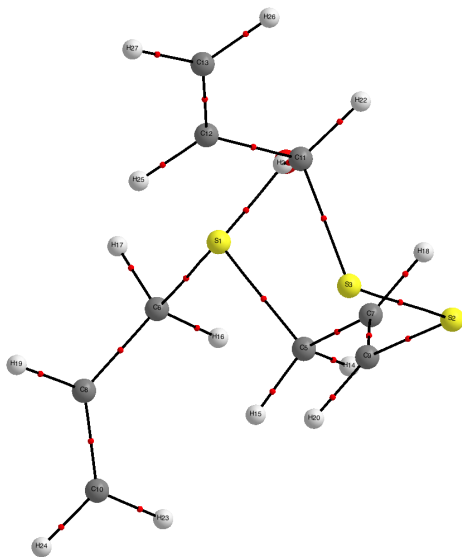

**Figure S538.** Ajoene\_(E)\_conformer\_202

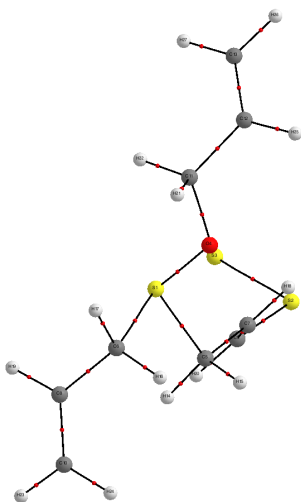

**Figure S539.** Ajoene\_(E)\_conformer\_203

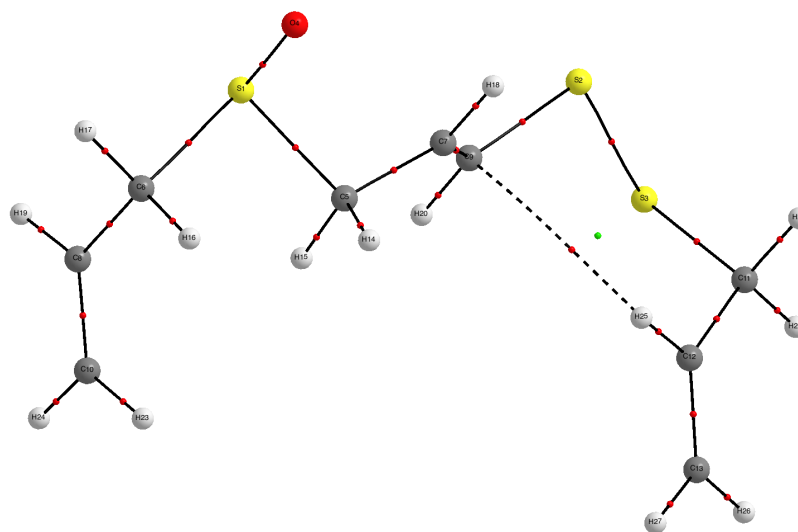

**Figure S540.** Ajoene\_(E)\_conformer\_204

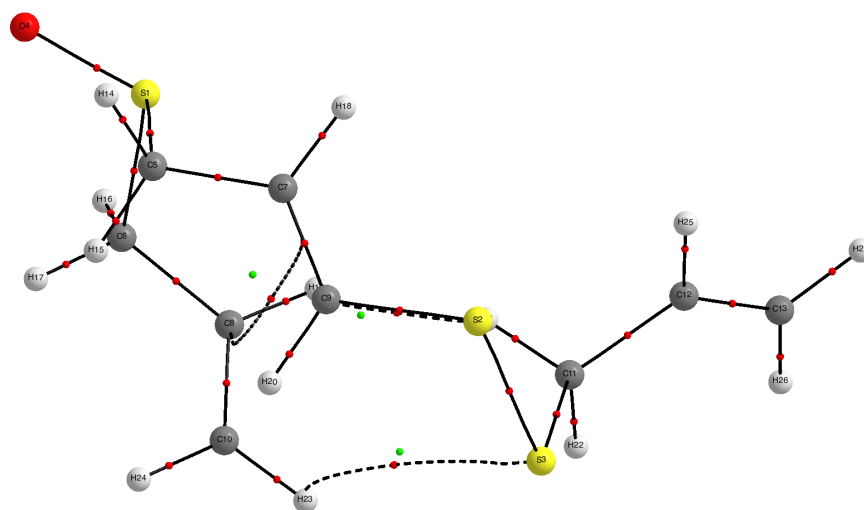

**Figure S541.** Ajoene\_(E)\_conformer\_205

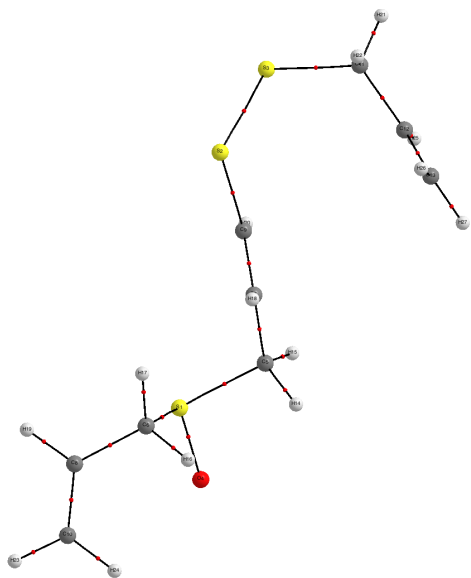

**Figure S542.** Ajoene\_(E)\_conformer\_206

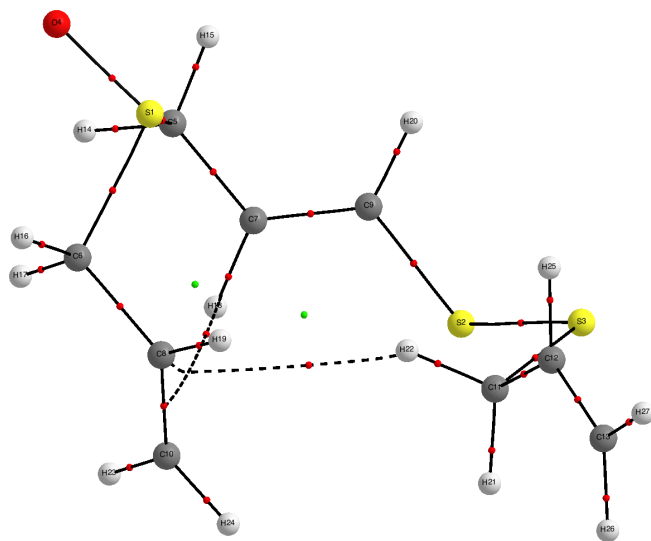

**Figure S543.** Ajoene\_(E)\_conformer\_207

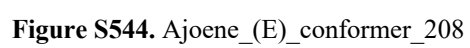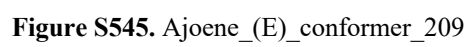

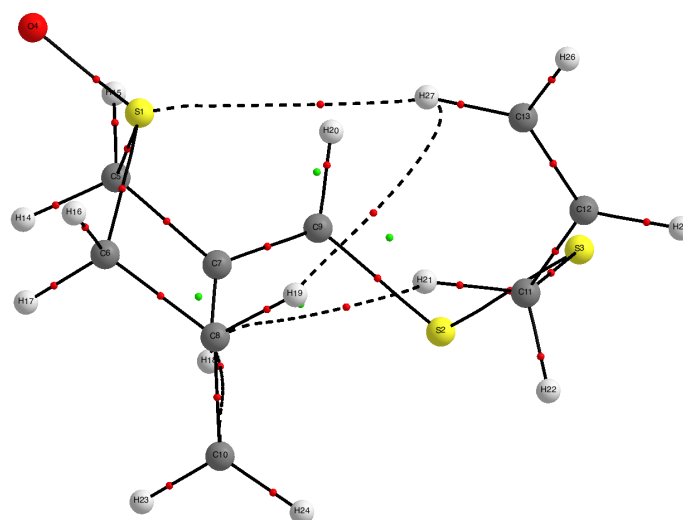

**Figure S546.** Ajoene\_(E)\_conformer\_210

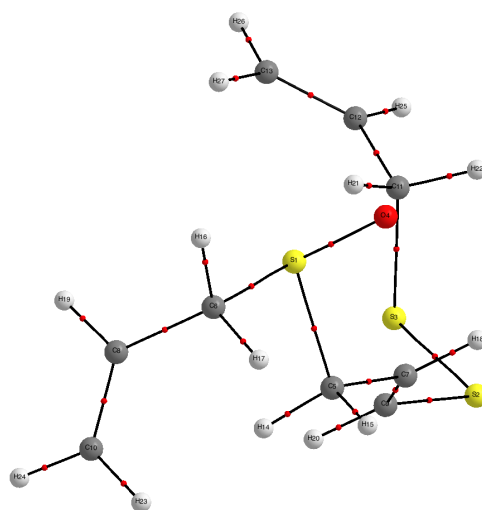

**Figure S547.** Ajoene\_(E)\_conformer\_211



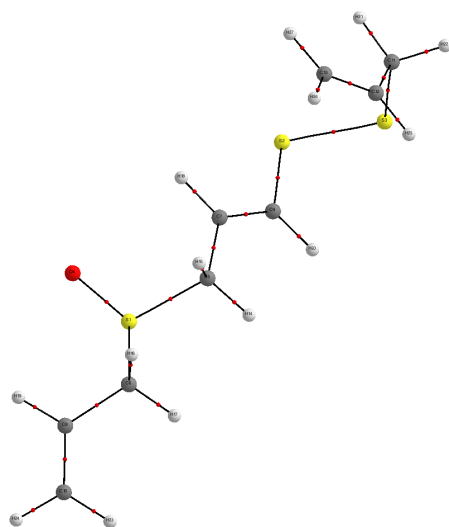

**Figure S548.** Ajoene\_(E)\_conformer\_212

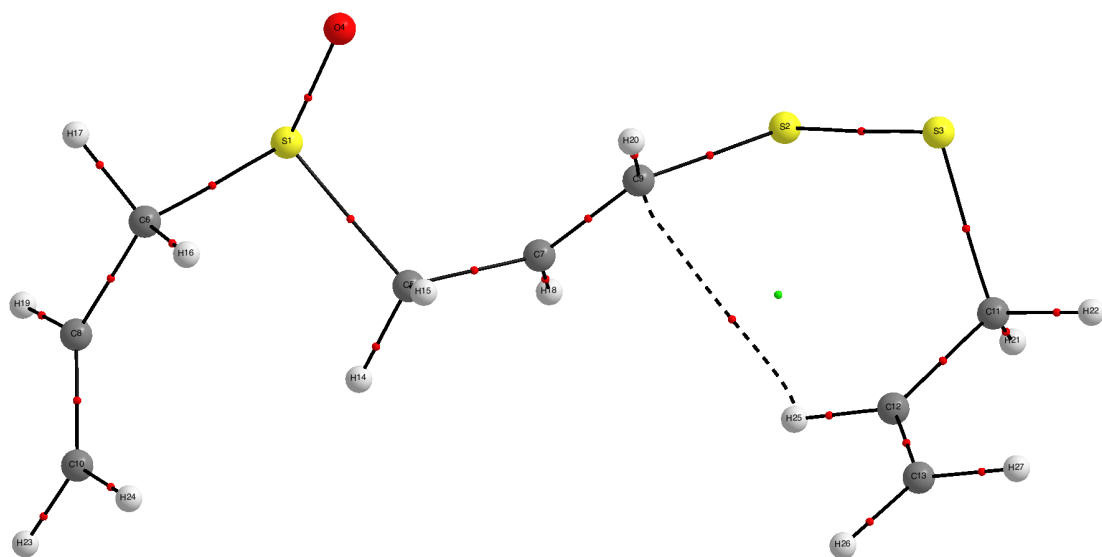

**Figure S549.** Ajoene\_(E)\_conformer\_213

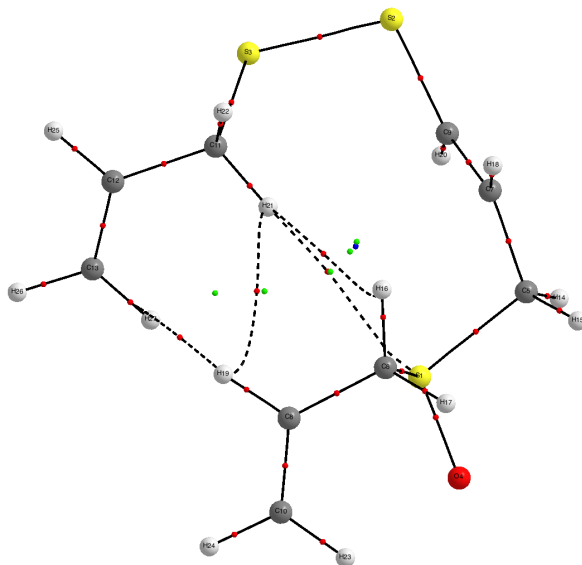

**Figure S550.** Ajoene\_(E)\_conformer\_214

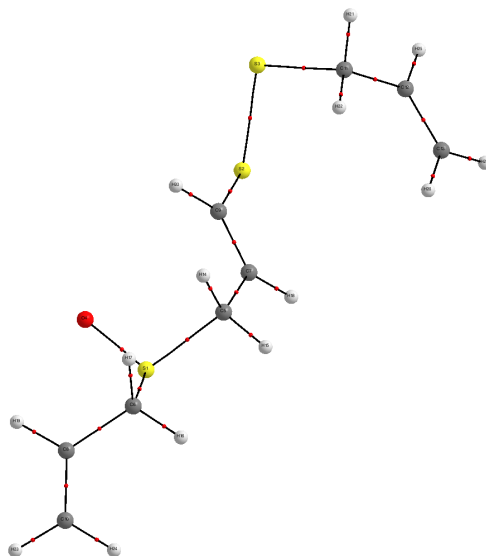

**Figure S551.** Ajoene\_(E)\_conformer\_215

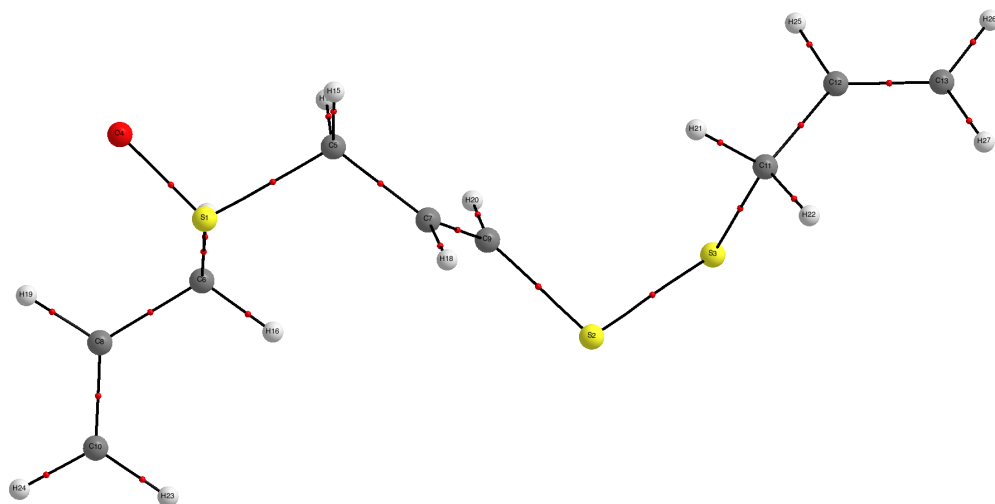

**Figure S552.** Ajoene\_(E)\_conformer\_216

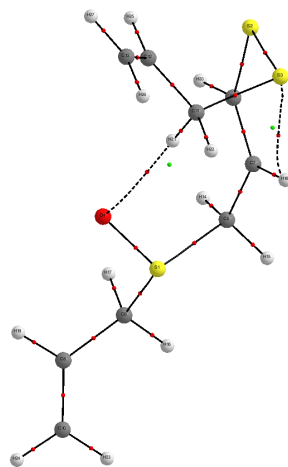

**Figure S553.** Ajoene\_(E)\_conformer\_217

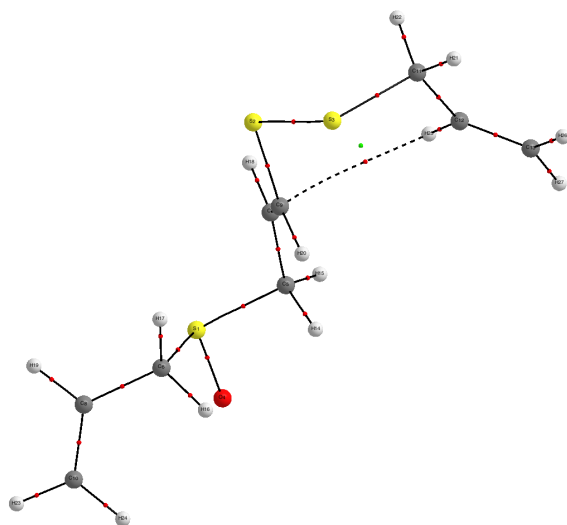

**Figure S554.** Ajoene\_(E)\_conformer\_218

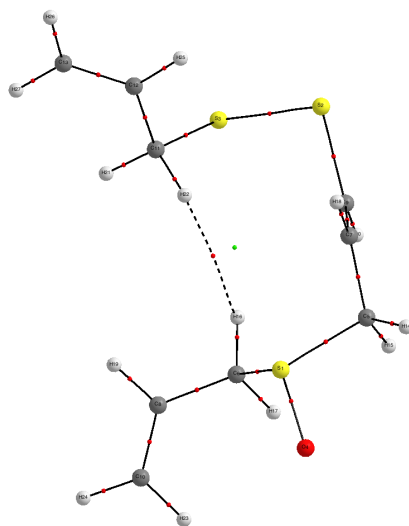

**Figure S555.** Ajoene\_(E)\_conformer\_219

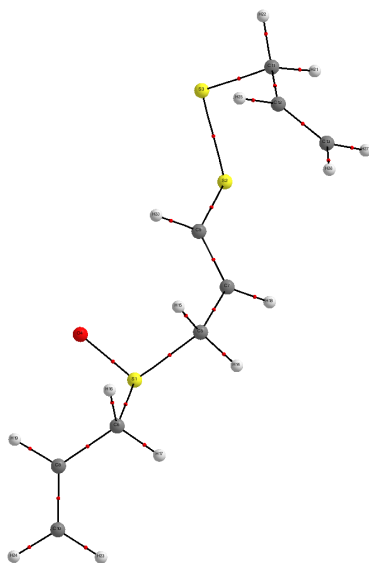

**Figure S556.** Ajoene\_(E)\_conformer\_220

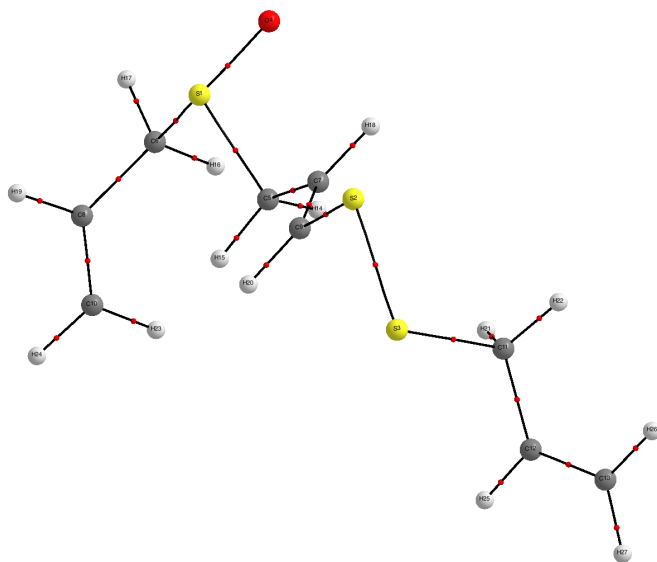

**Figure S557.** Ajoene\_(E)\_conformer\_221

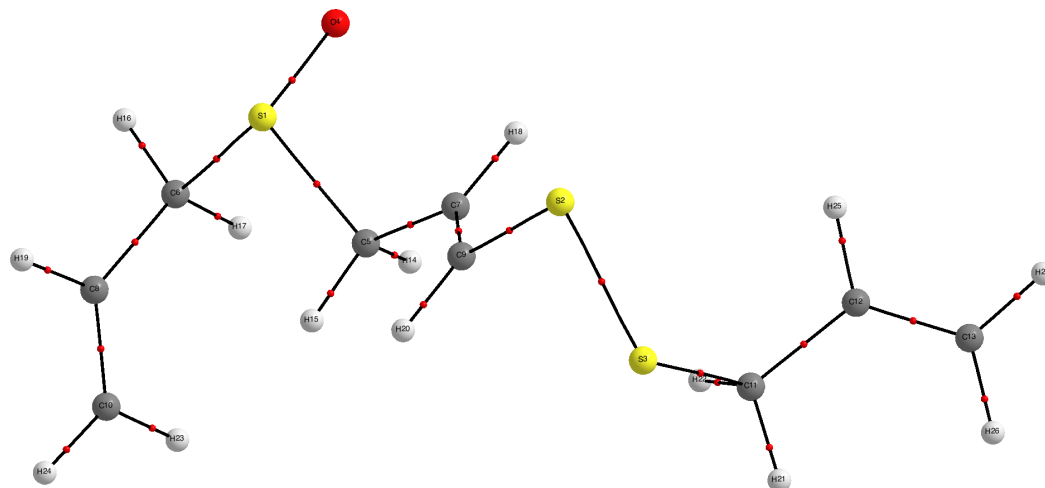

**Figure S558.** Ajoene\_(E)\_conformer\_222

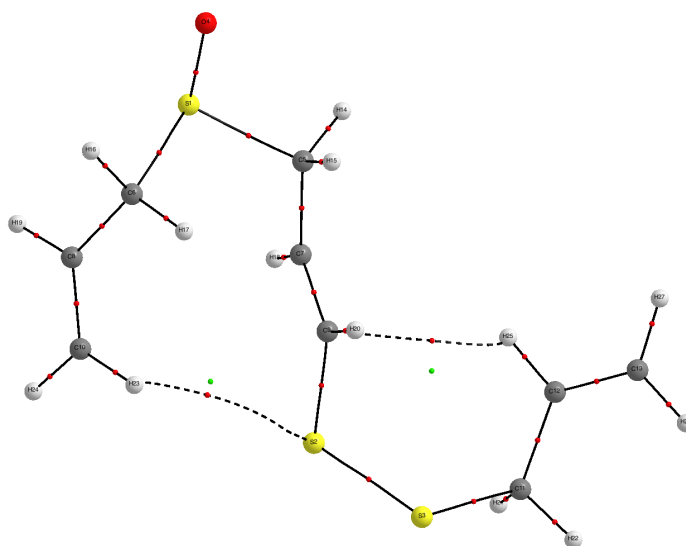

**Figure S559.** Ajoene\_(E)\_conformer\_223

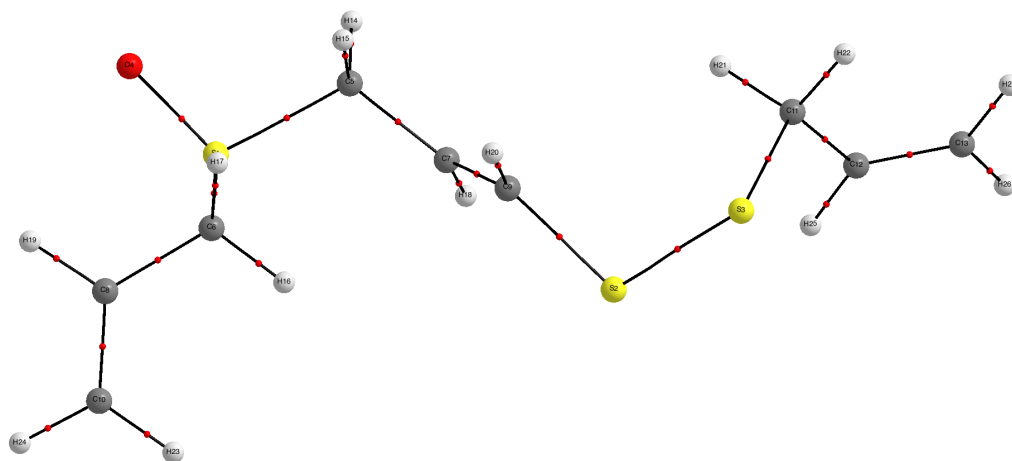

**Figure S560.** Ajoene\_(E)\_conformer\_224

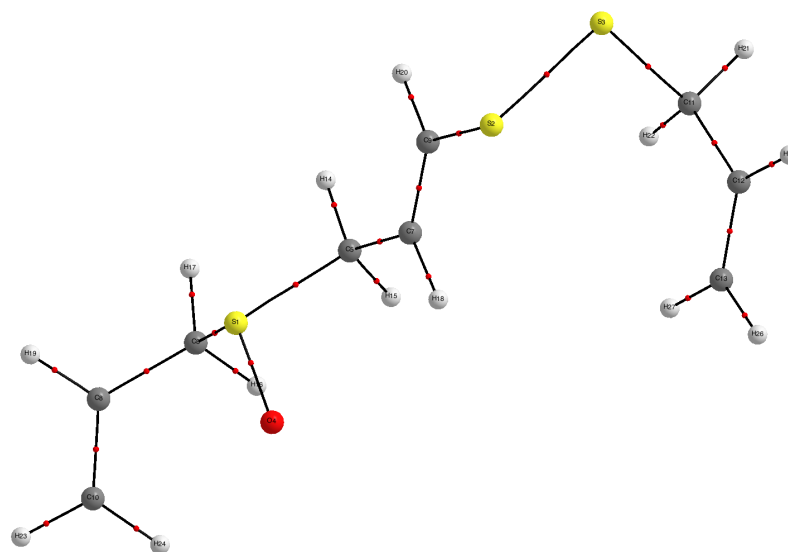

**Figure S561.** Ajoene\_(E)\_conformer\_225

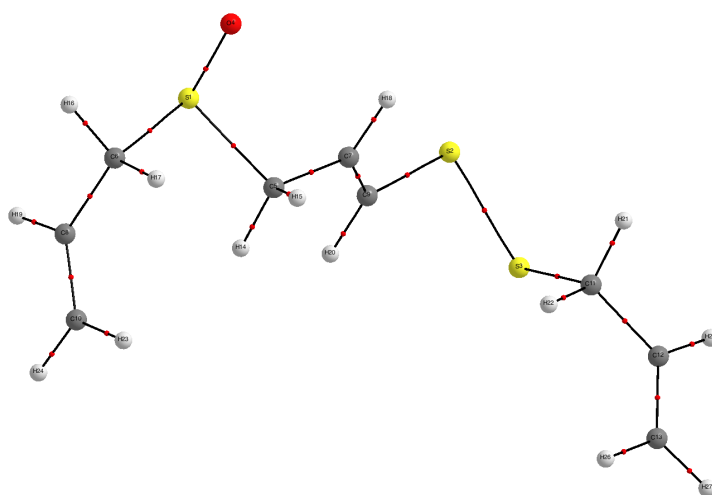

**Figure S562.** Ajoene\_(E)\_conformer\_226

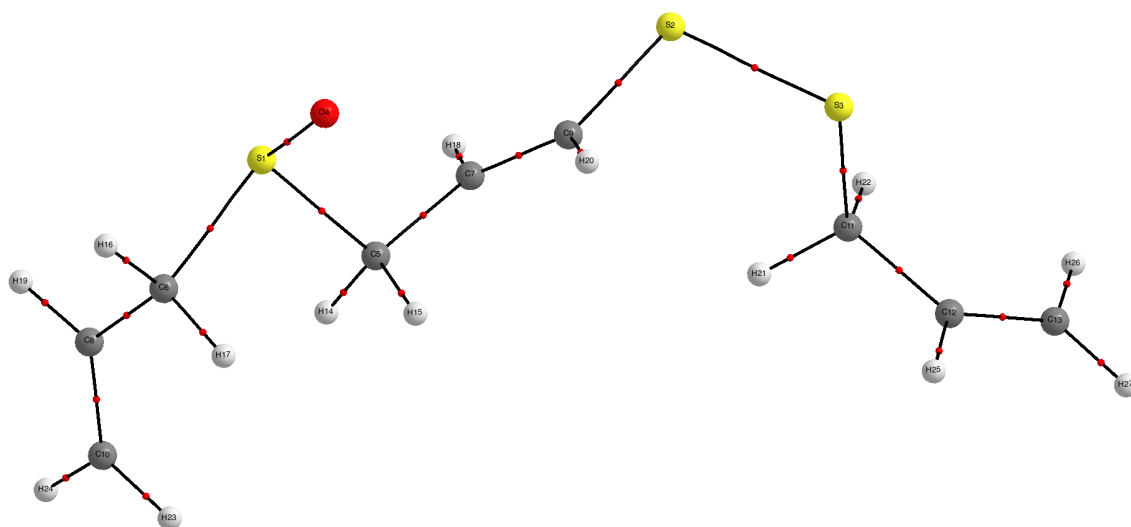

**Figure S563.** Ajoene\_(E)\_conformer\_227



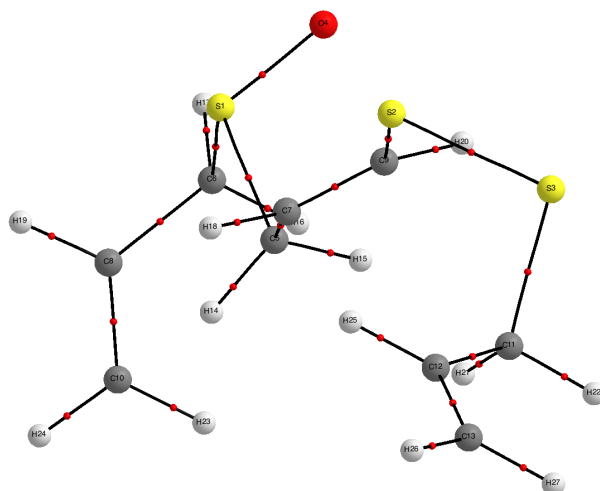

**Figure S564.** Ajoene\_(E)\_conformer\_228

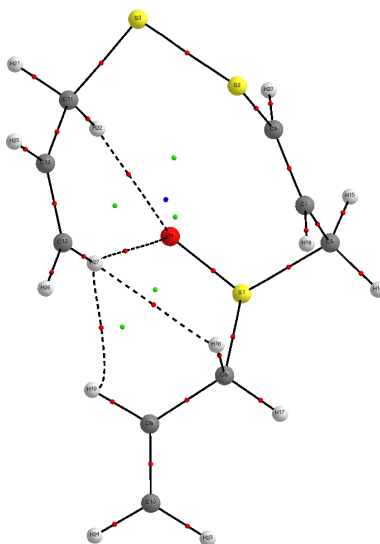

**Figure S565.** Ajoene\_(E)\_conformer\_229

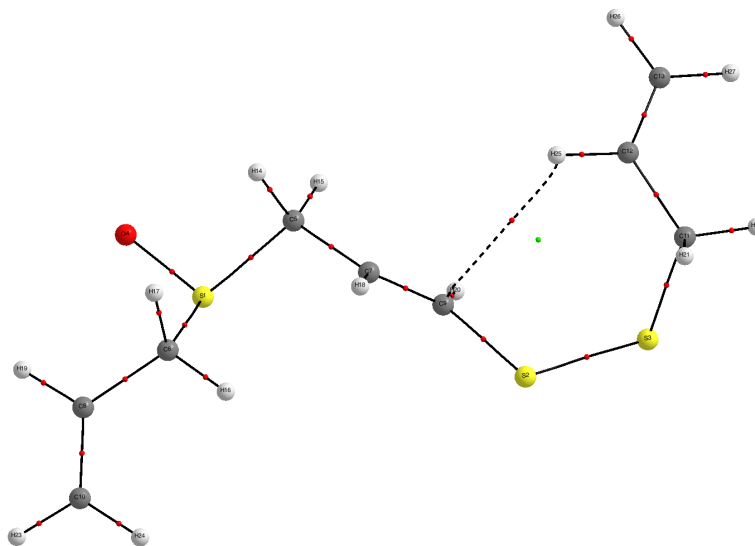

**Figure S566.** Ajoene\_(E)\_conformer\_230

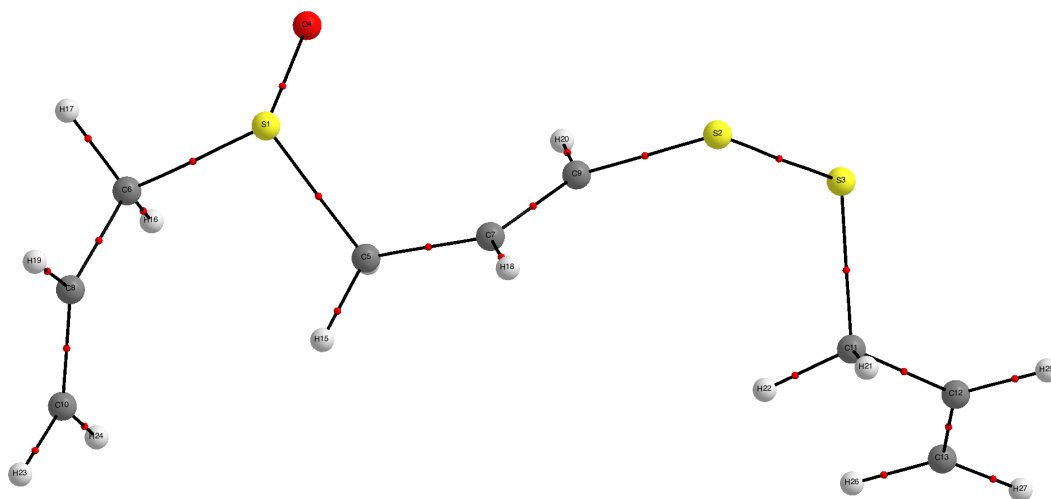

**Figure S567.** Ajoene\_(E)\_conformer\_231

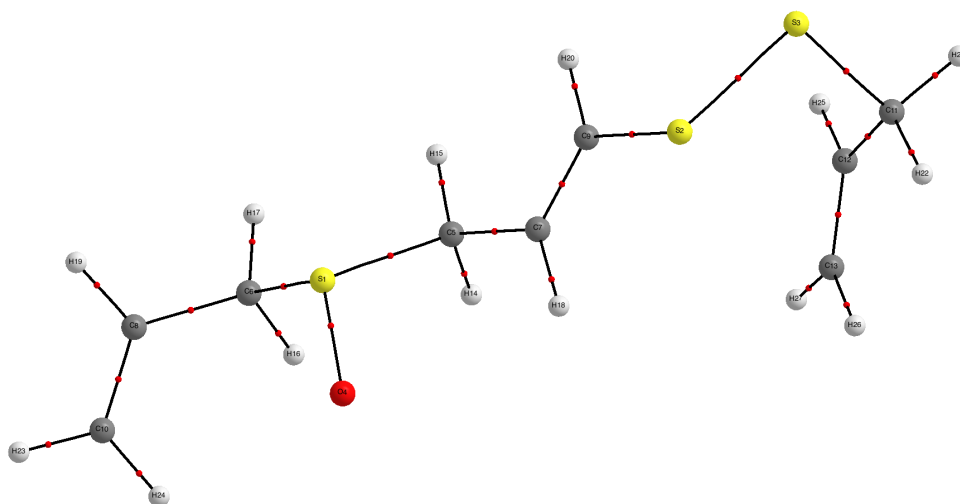

**Figure S568.** Ajoene\_(E)\_conformer\_232

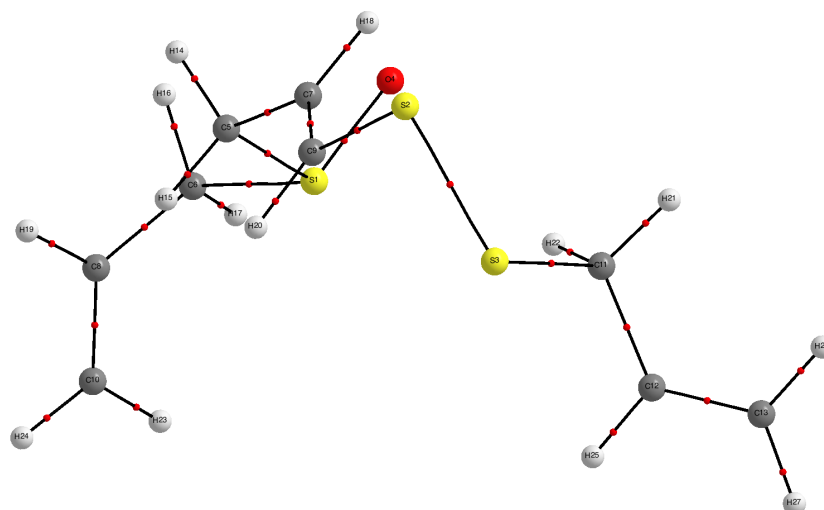

**Figure S569.** Ajoene\_(E)\_conformer\_233



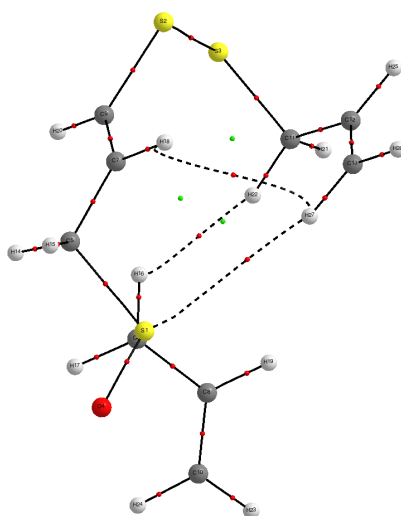

**Figure S572.** Ajoene\_(E)\_conformer\_236

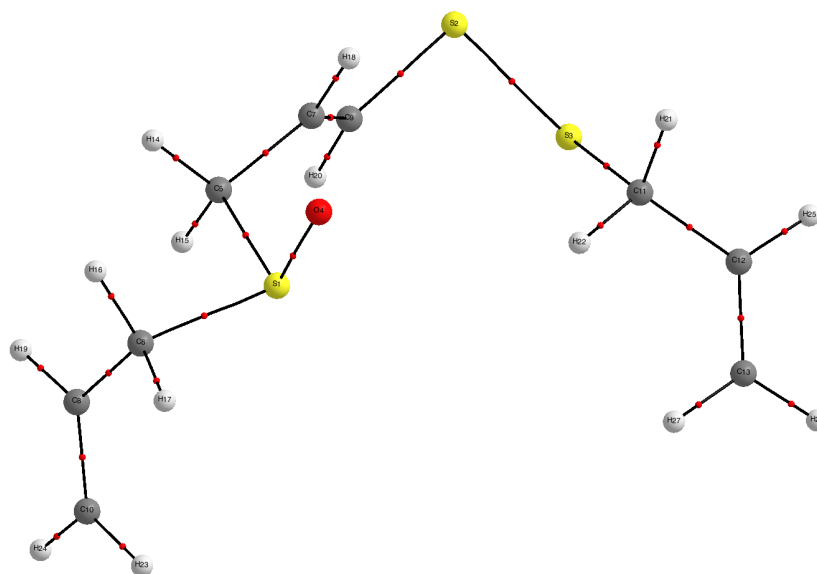

**Figure S573.** Ajoene\_(E)\_conformer\_237

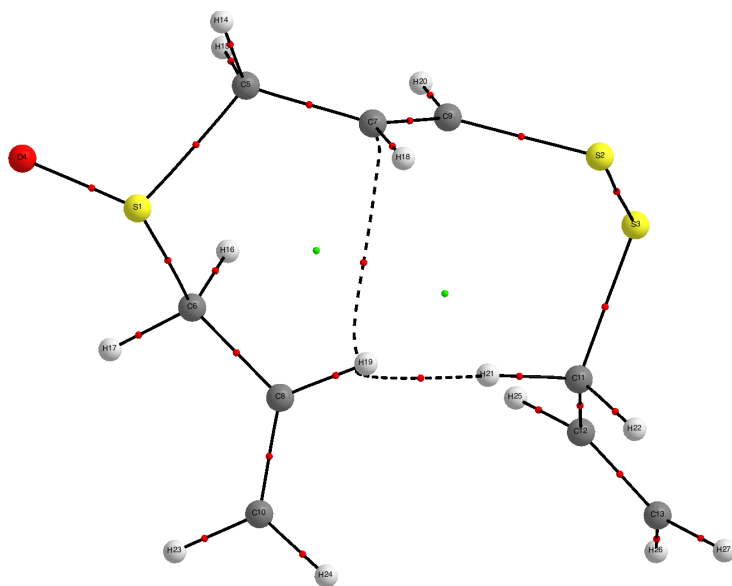

**Figure S574.** Ajoene\_(E)\_conformer\_238

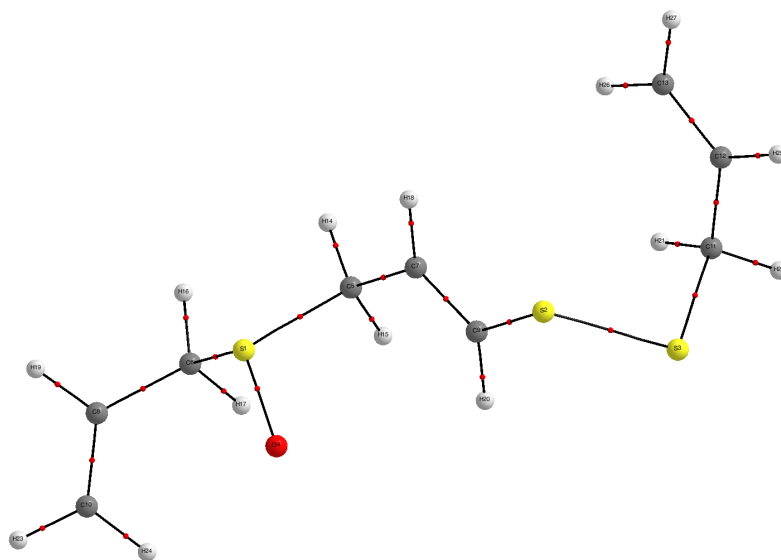

**Figure S575.** Ajoene\_(E)\_conformer\_239

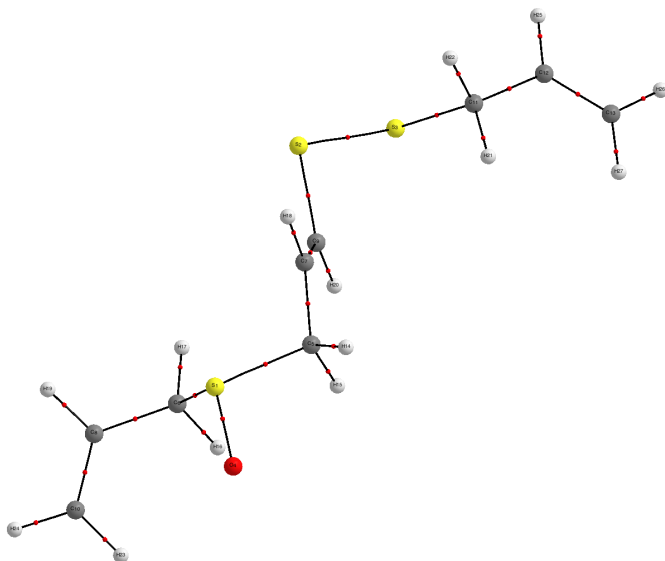

**Figure S576.** Ajoene\_(E)\_conformer\_240

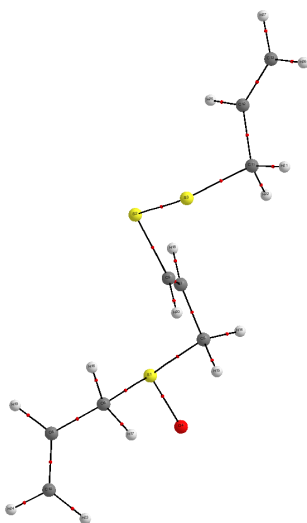

**Figure S577.** Ajoene\_(E)\_conformer\_241

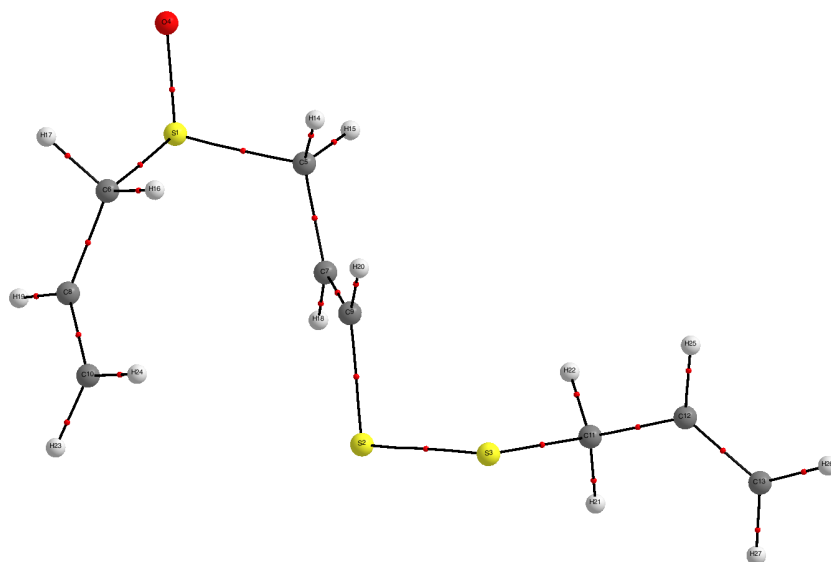

**Figure S578.** Ajoene\_(E)\_conformer\_242

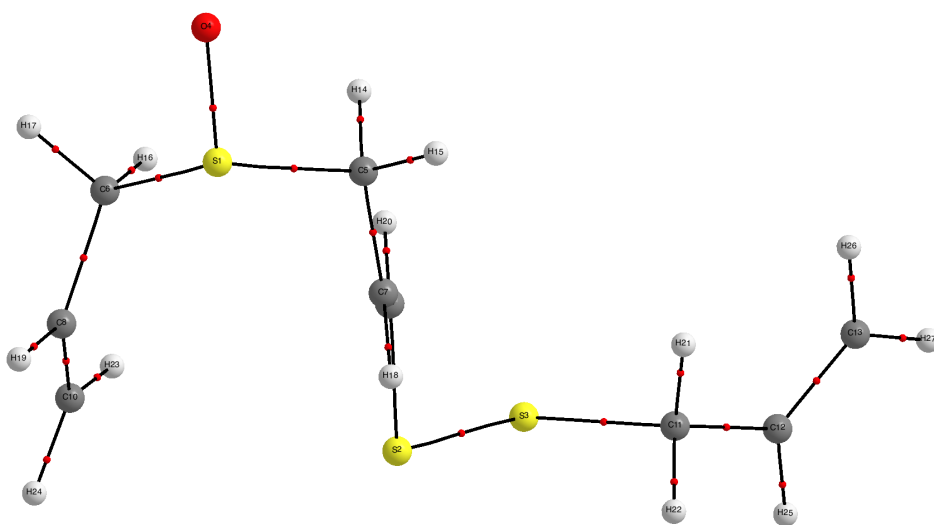

**Figure S579.** Ajoene\_(E)\_conformer\_243



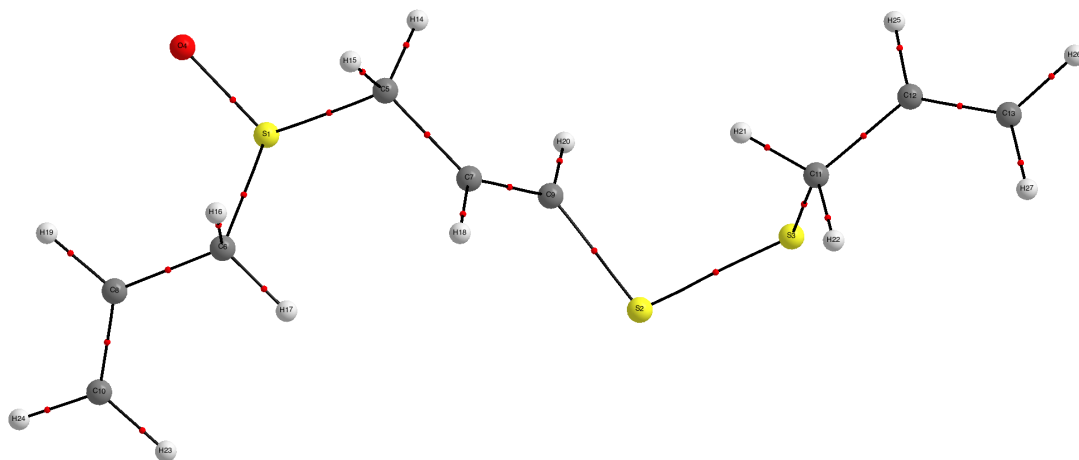

**Figure S580.** Ajoene\_(E)\_conformer\_244

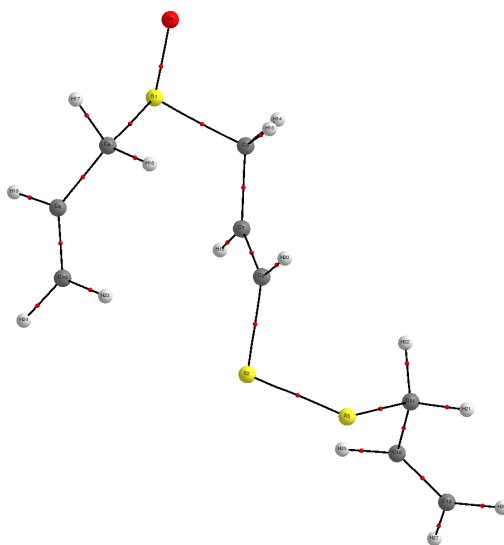

**Figure S581.** Ajoene\_(E)\_conformer\_245

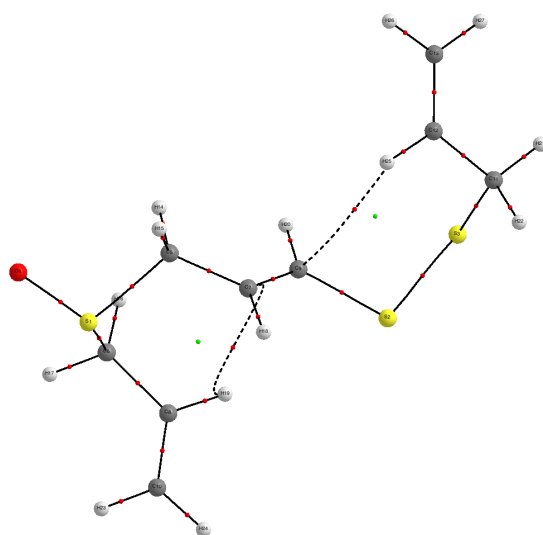

**Figure S582.** Ajoene\_(E)\_conformer\_246

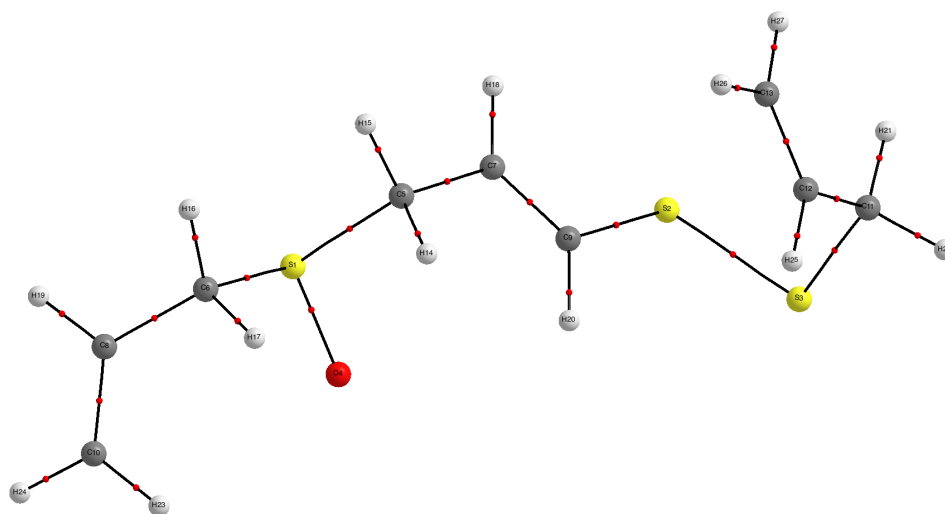

**Figure S583.** Ajoene\_(E)\_conformer\_247

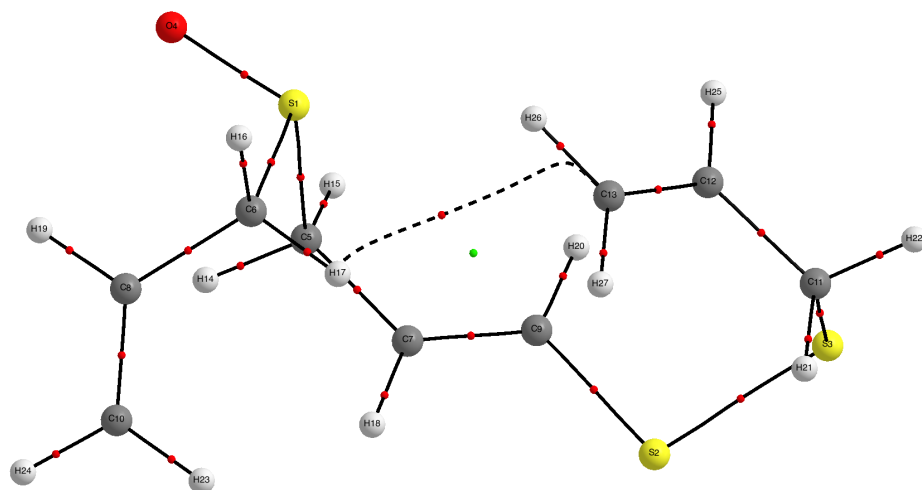

**Figure S584.** Ajoene\_(E)\_conformer\_248

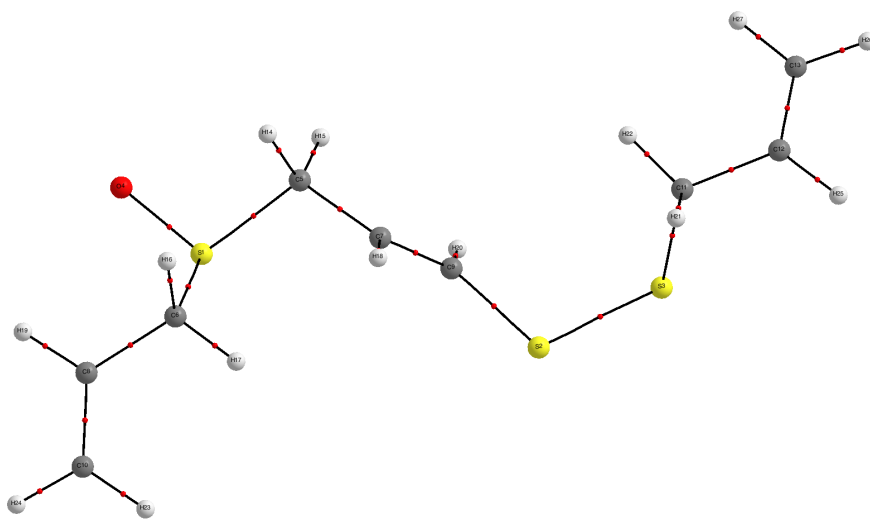

**Figure S585.** Ajoene\_(E)\_conformer\_249

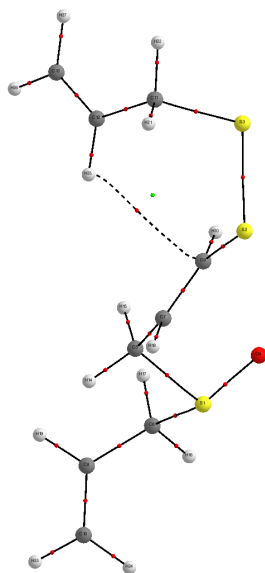

**Figure S586.** Ajoene\_(E)\_conformer\_250

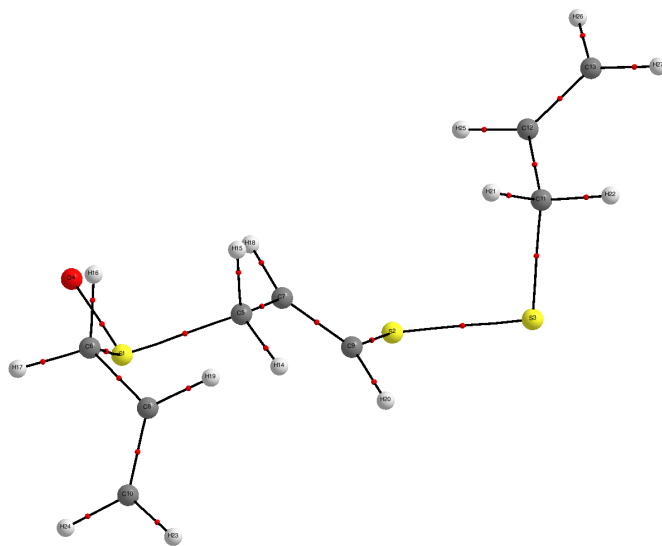

**Figure S587.** Ajoene\_(E)\_conformer\_251

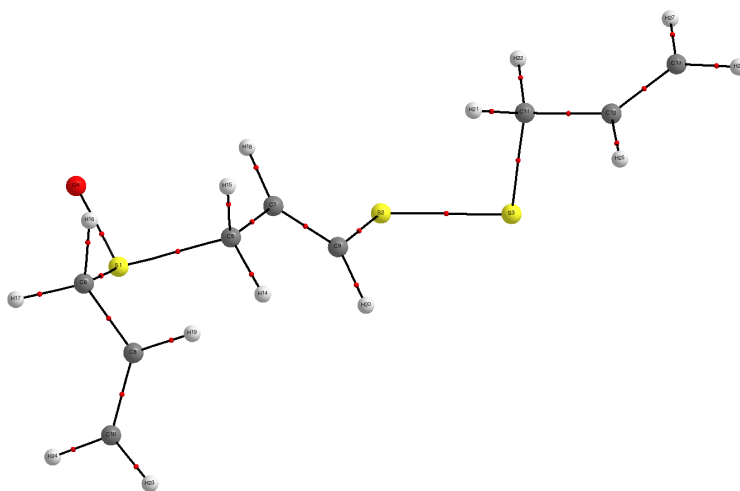

**Figure S588.** Ajoene\_(E)\_conformer\_252

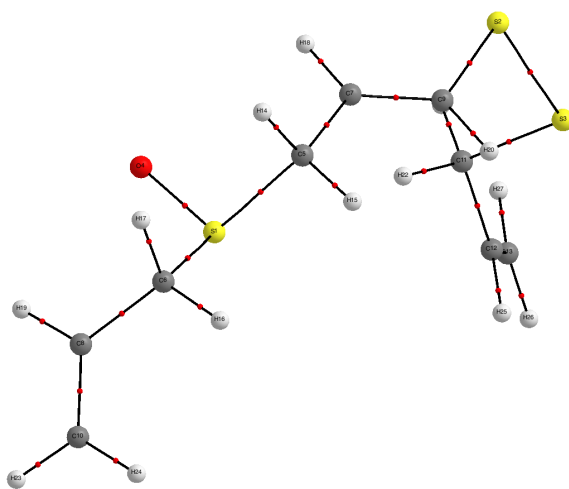

**Figure S589.** Ajoene\_(E)\_conformer\_253

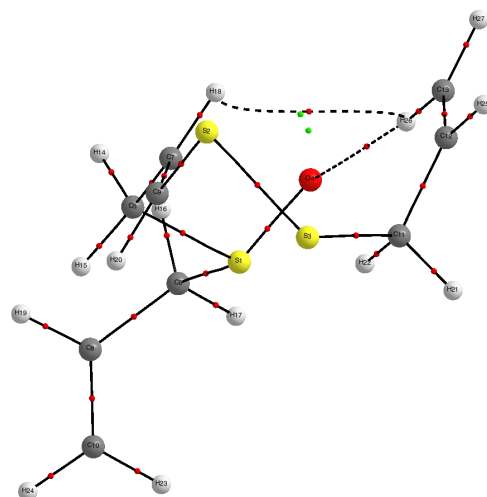

**Figure S590.** Ajoene\_(E)\_conformer\_254

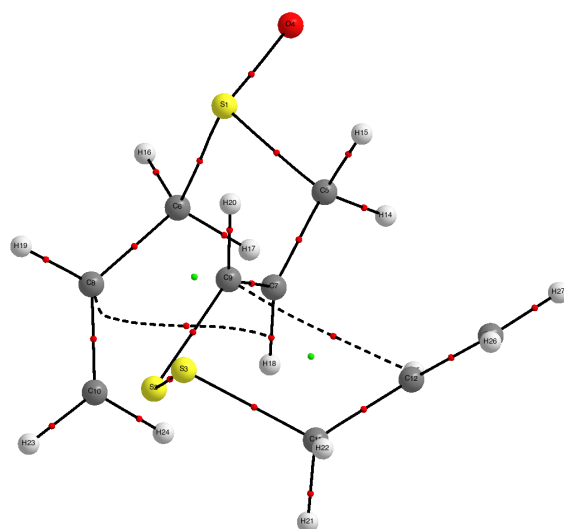

**Figure S591.** Ajoene\_(E)\_conformer\_255

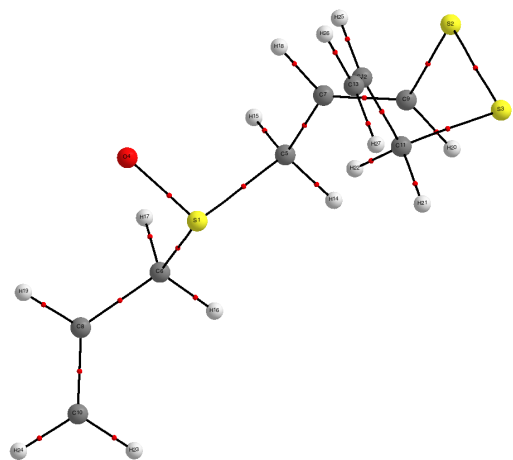

**Figure S592.** Ajoene\_(E)\_conformer\_256

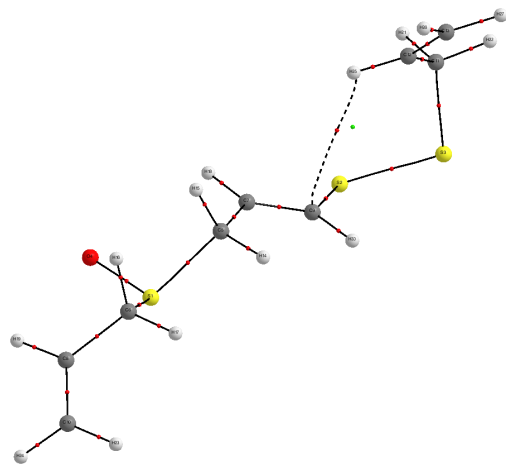

**Figure S593.** Ajoene\_(E)\_conformer\_257

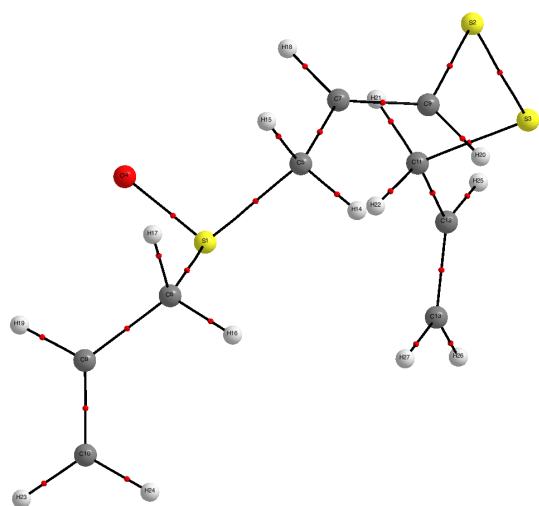

**Figure S594.** Ajoene\_(E)\_conformer\_258

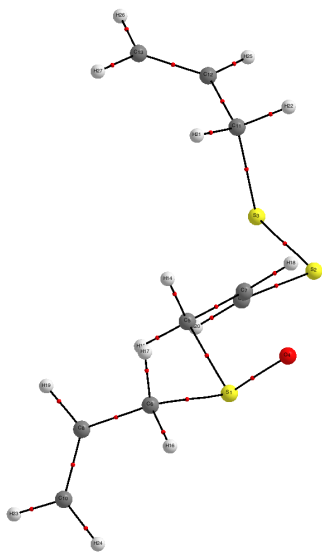

**Figure S595.** Ajoene\_(E)\_conformer\_259



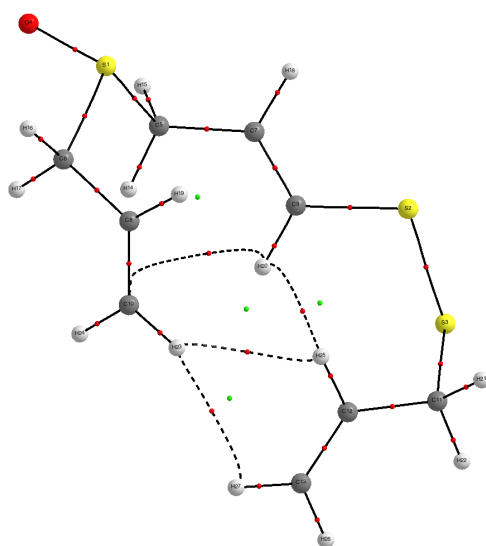

**Figure S596.** Ajoene\_(E)\_conformer\_260

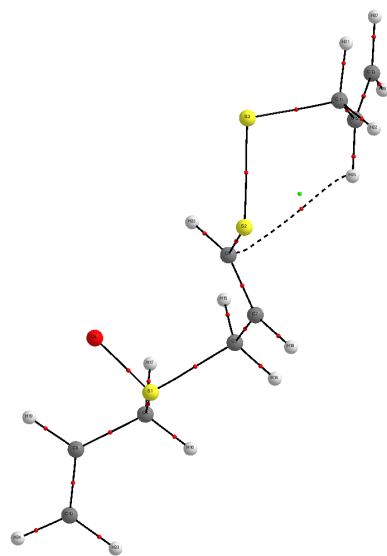

**Figure S597.** Ajoene\_(E)\_conformer\_261

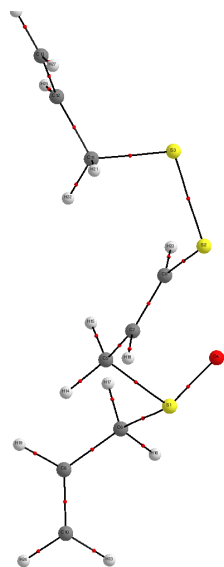

**Figure S598.** Ajoene\_(E)\_conformer\_262

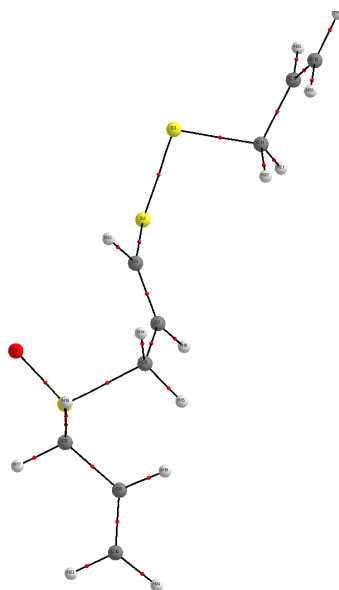

**Figure S599.** Ajoene\_(E)\_conformer\_263

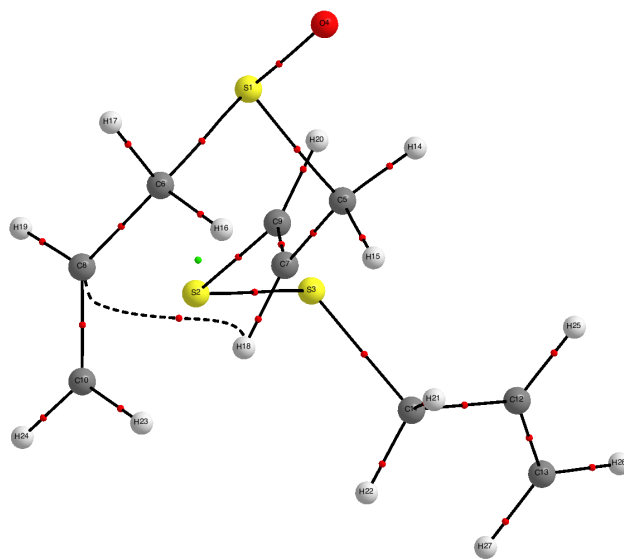

**Figure S600.** Ajoene\_(E)\_conformer\_264

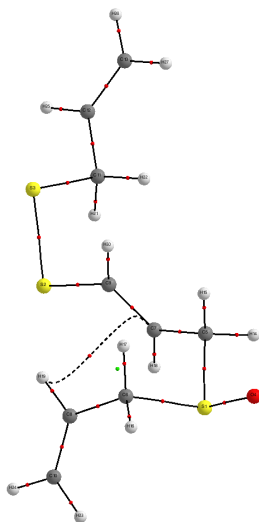

**Figure S601.** Ajoene\_(E)\_conformer\_265

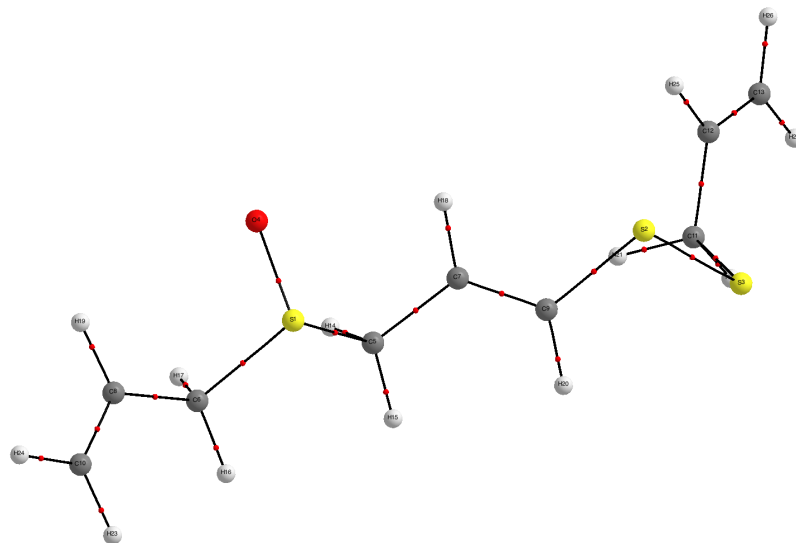

**Figure S602.** Ajoene\_(E)\_conformer\_266

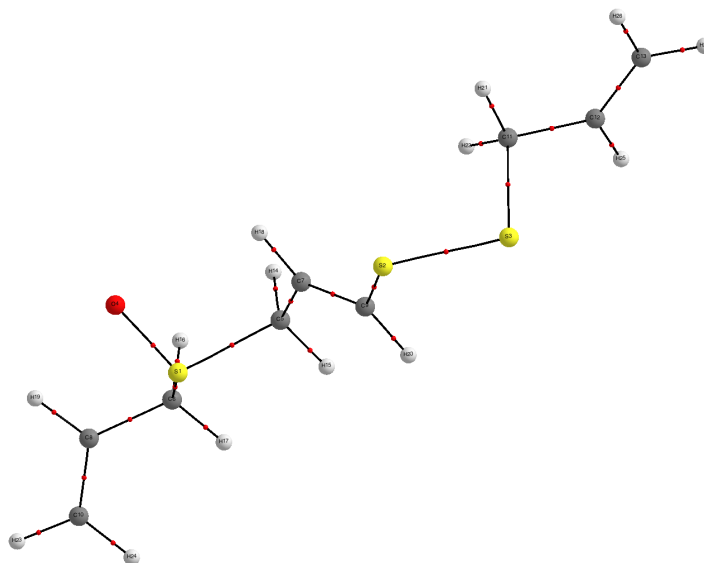

**Figure S603.** Ajoene\_(E)\_conformer\_267

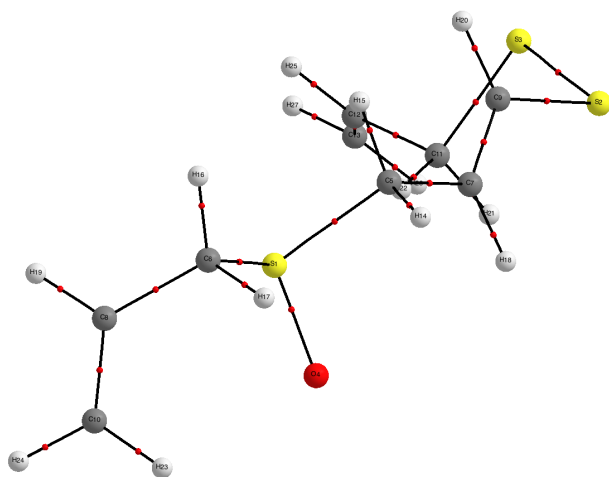

**Figure S604.** Ajoene\_(E)\_conformer\_268

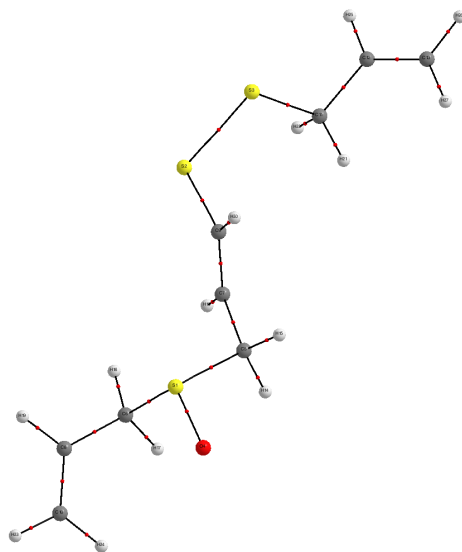

**Figure S605.** Ajoene\_(E)\_conformer\_269

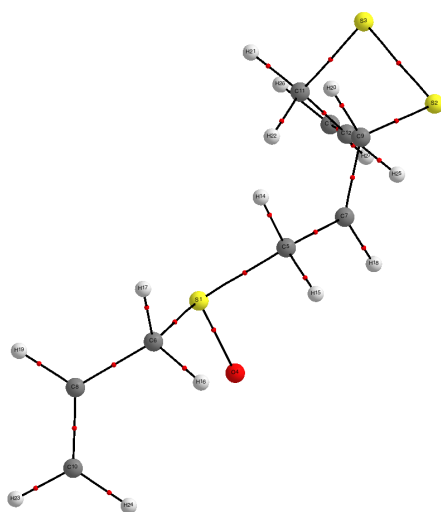

**Figure S606.** Ajoene\_(E)\_conformer\_270

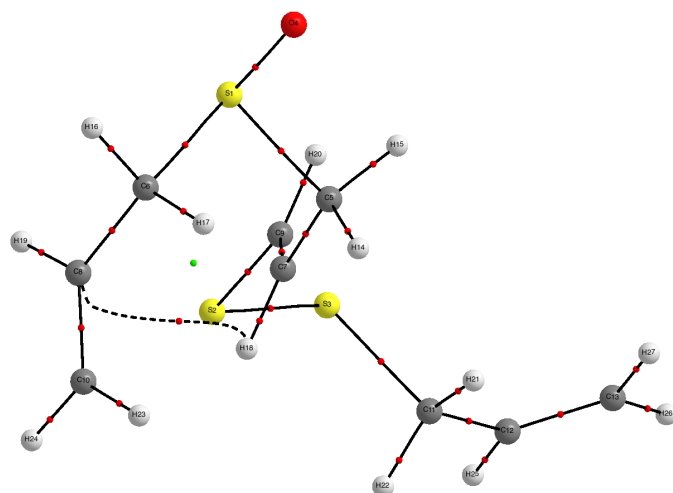

**Figure S607.** Ajoene\_(E)\_conformer\_271

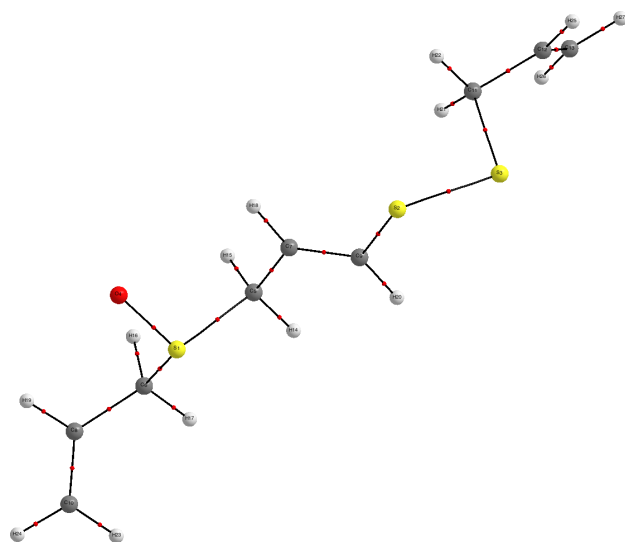

**Figure S608.** Ajoene\_(E)\_conformer\_272

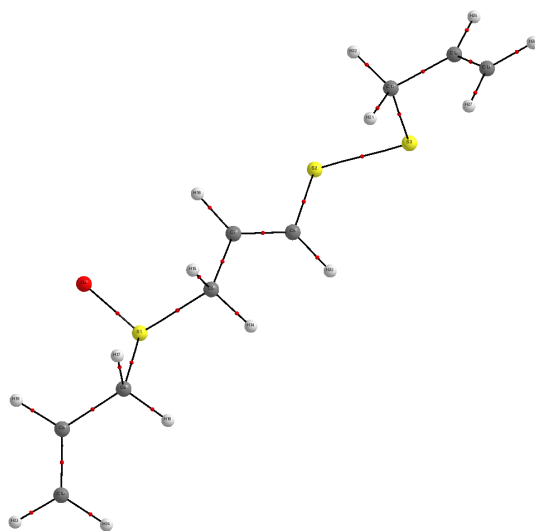

**Figure S609.** Ajoene\_(E)\_conformer\_273

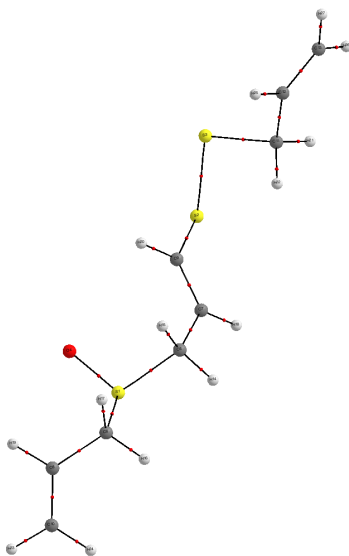

**Figure S610.** Ajoene\_(E)\_conformer\_274

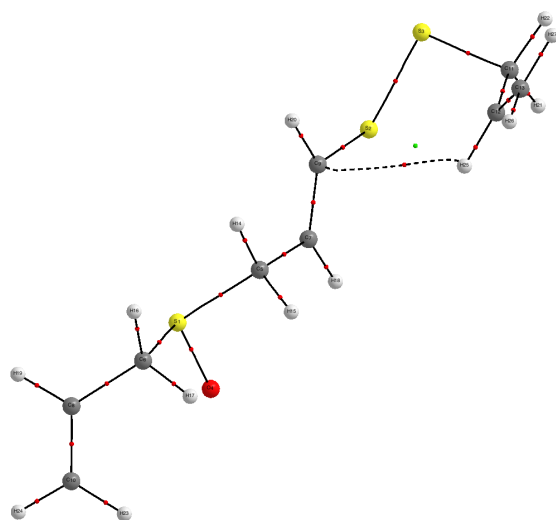

**Figure S611.** Ajoene\_(E)\_conformer\_275



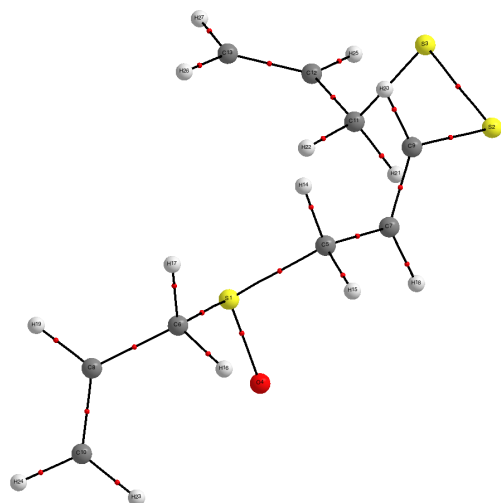

**Figure S612.** Ajoene\_(E)\_conformer\_276

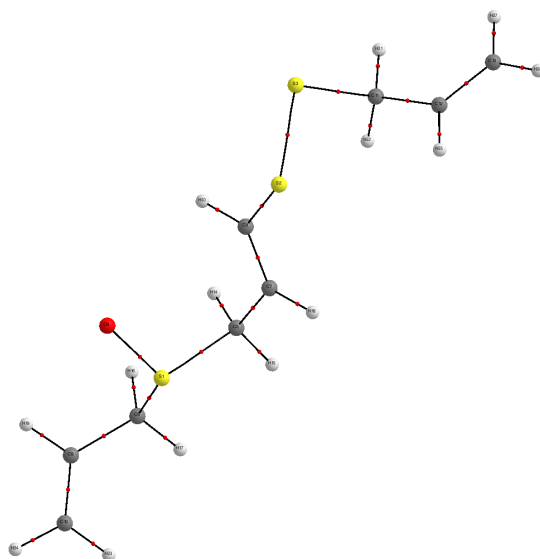

**Figure S613.** Ajoene\_(E)\_conformer\_277

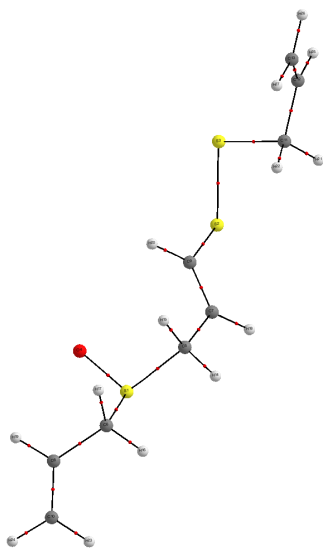

**Figure S614.** Ajoene\_(E)\_conformer\_278

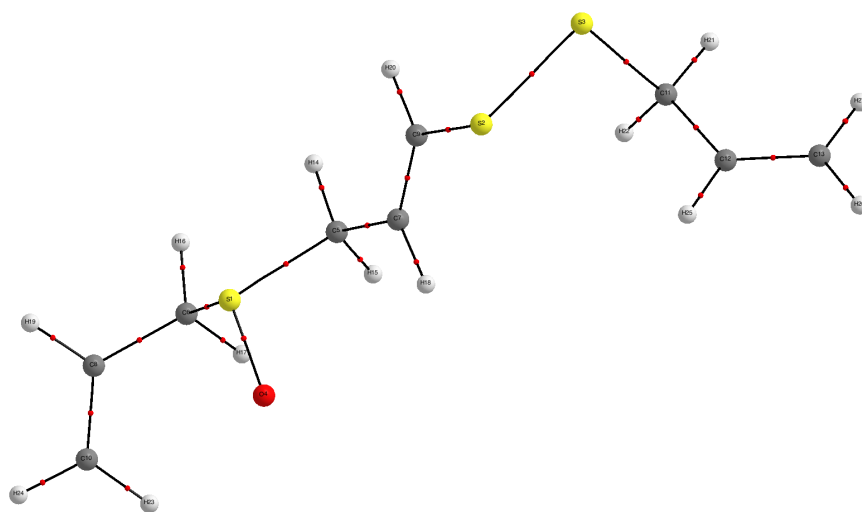

**Figure S615.** Ajoene\_(E)\_conformer\_279

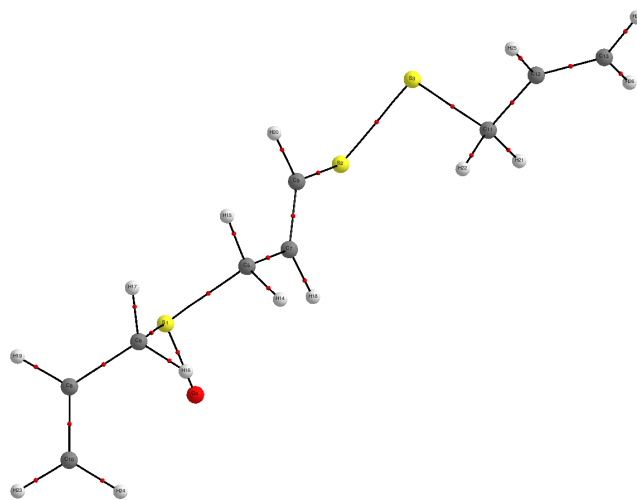

**Figure S616.** Ajoene\_(E)\_conformer\_280

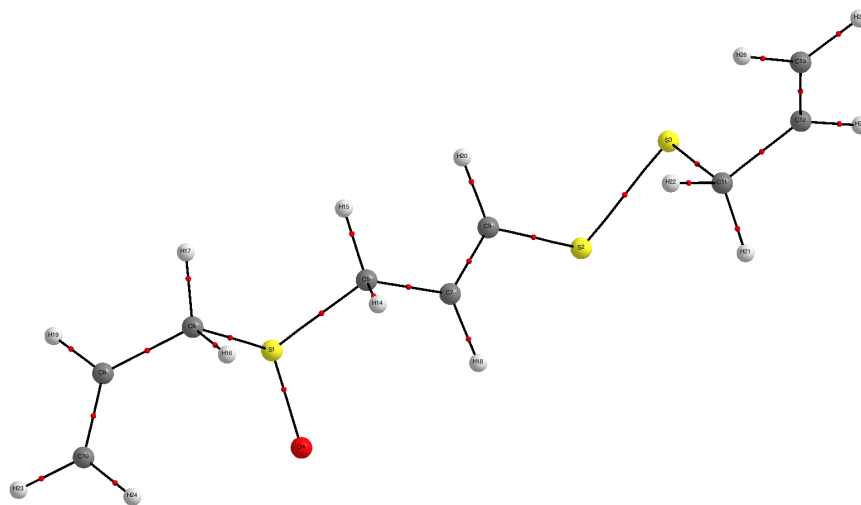

**Figure S617.** Ajoene\_(E)\_conformer\_281

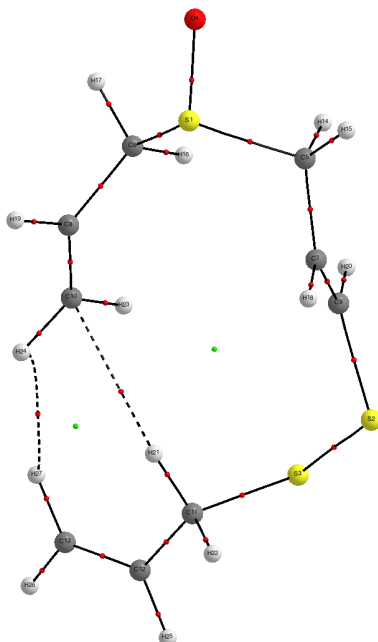

**Figure S618.** Ajoene\_(E)\_conformer\_282

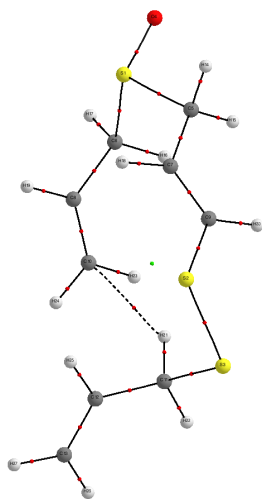

**Figure S619.** Ajoene\_(E)\_conformer\_283

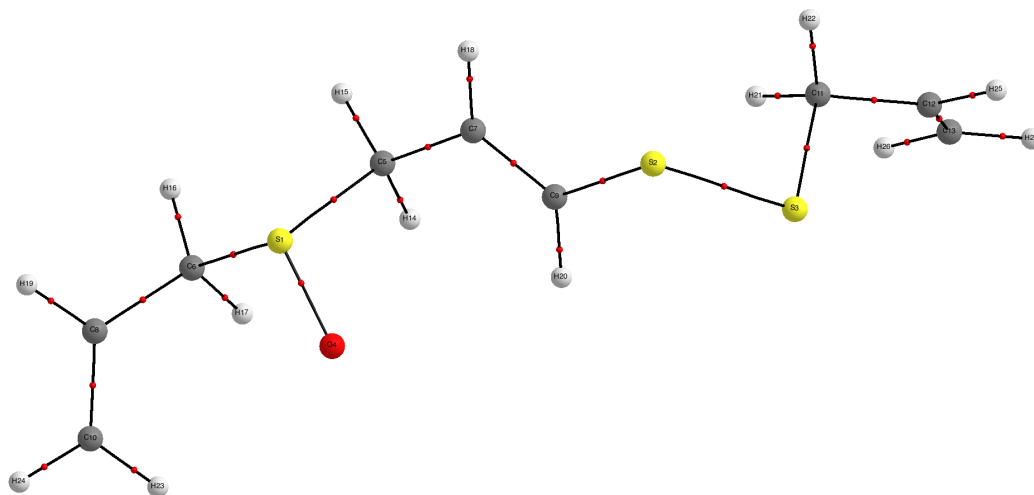

**Figure S620.** Ajoene\_(E)\_conformer\_284

| <b>Molecule</b>     | <b>Supplementary Figures</b> |
|---------------------|------------------------------|
| Diallyl monosulfide | Figures S1 – S13             |
| Diallyl disulfide   | Figures S14 – S35            |
| Diallyl trisulfide  | Figures S36 – S71            |
| Allicin             | Figures S72 – S120           |
| Ajoene_(E)          | Figures S121 – S336          |
| Ajoene_(Z)          | Figures S337 – S620          |
