# Supplementary material for: Comparative Analysis of Molecular Conformers Using Localization–Delocalization Matrices and Frobenius Distance
Source: Research Square preprint supplement (doi:10.21203/rs.3.rs-7999250/v1), 2025-11-18
Supplement: Supplementary file 2 [file 2a42d6bcca2efc288d099d3d.xlsx]

## Sheet: Boltzmann_distribution
Conformer ID	E (HF)	Delta E(HF)	HF (kcal/mol)	Boltzman distribution	Boltzman's weight	% (percentage)	Conformer_type	FD_R	FD_W	Nloc	Ndeloc
1	-591.296	0	0	1	0.869274	0.869274	Acyclic	0	0	36.5254	11.4751
2	-591.293	0.0033199	2.08325	0.0303746	0.0264038	0.0264038	Acyclic	0.0390884	0.04	36.5452	11.4556
3	-591.293	0.0034315	2.15328	0.0270084	0.0234777	0.0234777	Acyclic	0.0398819	0.04	36.5462	11.4536
4	-591.293	0.0036762	2.30683	0.0208761	0.018147	0.018147	Acyclic	0.032441	0.03	36.5442	11.4551
5	-591.293	0.0037239	2.33676	0.0198539	0.0172585	0.0172585	Acyclic	0.0466336	0.04	36.5443	11.4567
6	-591.294	0.0028041	1.75958	0.0522729	0.0454394	0.0454394	Acyclic	0.0358036	0.03	36.5281	11.4716
			1.15039		1	1
										48.0005

## Sheet: LDM
LDM — 2_PSA_1_LIDI_matrix
	S1	O2	C3	C4	C5	H6	H7	H8	H9	H10	H11	Nloc	Ndeloc
S1	14.2464	0.572053	0.528878	0.0457328	0.0253701	0.0263667	0.0306057	0.0054964	0.0139434	0.0015236	0.00151851	36.5254	11.4751	48.0005
O2	0.572053	8.07847	0.044823	0.013653	0.0121291	0.00781493	0.00492882	0.000521718	0.329312	0.000406487	0.0024899
C3	0.528878	0.044823	4.02571	0.515153	0.0355242	0.46658	0.463546	0.0197763	0.000680323	0.0063096	0.00609103
C4	0.0457328	0.013653	0.515153	3.97496	0.914237	0.0189028	0.0189734	0.474186	0.00317696	0.03036	0.029815
C5	0.0253701	0.0121291	0.0355242	0.914237	4.09302	0.00774546	0.0060864	0.0293879	0.00411187	0.484504	0.480026
H6	0.0263667	0.00781493	0.46658	0.0189028	0.00774546	0.40067	0.014758	0.00197802	0.000110628	0.000855134	0.000455684
H7	0.0306057	0.00492882	0.463546	0.0189734	0.0060864	0.014758	0.394281	0.00482546	8.01136e-05	0.000423731	0.00366533
H8	0.0054964	0.000521718	0.0197763	0.474186	0.0293879	0.00197802	0.00482546	0.412771	0.000100854	0.00366595	0.00679518
H9	0.0139434	0.329312	0.000680323	0.00317696	0.00411187	0.000110628	8.01136e-05	0.000100854	0.0797417	0.000113406	0.000197592
H10	0.0015236	0.000406487	0.0063096	0.03036	0.484504	0.000855134	0.000423731	0.00366595	0.000113406	0.411678	0.016809
H11	0.00151851	0.0024899	0.00609103	0.029815	0.480026	0.000455684	0.00366533	0.00679518	0.000197592	0.016809	0.40767
LDM — 2_PSA_2_LIDI_matrix
	S1	O2	C3	C4	C5	H6	H7	H8	H9	H10	H11
S1	14.2652	0.570648	0.532645	0.0422193	0.0210807	0.0269782	0.0317819	0.00250025	0.0136236	0.00154341	0.000996467	36.5452	11.4556	48.0008
O2	0.570648	8.07959	0.0432323	0.00815394	0.00176647	0.00774042	0.00486152	0.00689678	0.335596	0.000168321	0.000333415
C3	0.532645	0.0432323	4.02452	0.514413	0.0363042	0.46418	0.463451	0.0194455	0.000679665	0.00631798	0.00622277
C4	0.0422193	0.00815394	0.514413	3.97321	0.92472	0.018157	0.0198038	0.472762	0.000608563	0.0305742	0.030631
C5	0.0210807	0.00176647	0.0363042	0.92472	4.08277	0.00631101	0.00901231	0.029969	0.000228093	0.484062	0.481723
H6	0.0269782	0.00774042	0.46418	0.018157	0.00631101	0.40013	0.0147717	0.00520531	0.00017936	0.000479673	0.00408934
H7	0.0317819	0.00486152	0.463451	0.0198038	0.00901231	0.0147717	0.3933	0.00121486	0.000100955	0.00078859	0.000442641
H8	0.00250025	0.00689678	0.0194455	0.472762	0.029969	0.00520531	0.00121486	0.416152	0.000583054	0.00372604	0.00681239
H9	0.0136236	0.335596	0.000679665	0.000608563	0.000228093	0.00017936	0.000100955	0.000583054	0.0818004	1.34376e-05	2.99096e-05
H10	0.00154341	0.000168321	0.00631798	0.0305742	0.484062	0.000479673	0.00078859	0.00372604	1.34376e-05	0.412377	0.0170189
H11	0.000996467	0.000333415	0.00622277	0.030631	0.481723	0.00408934	0.000442641	0.00681239	2.99096e-05	0.0170189	0.416149
LDM — 2_PSA_3_LIDI_matrix
	S1	O2	C3	C4	C5	H6	H7	H8	H9	H10	H11
S1	14.2628	0.570572	0.527481	0.0452443	0.0219299	0.0287566	0.0308722	0.00634506	0.0138406	0.00110219	0.00139841	36.5462	11.4536	47.9997
O2	0.570572	8.08151	0.0433927	0.00851428	0.0041688	0.00805539	0.00233414	0.000407937	0.337721	0.000424711	0.000216277
C3	0.527481	0.0433927	4.02395	0.515089	0.0376724	0.462207	0.467774	0.0194911	0.000624771	0.00641198	0.00631942
C4	0.0452443	0.00851428	0.515089	3.97957	0.921128	0.018774	0.0189996	0.473108	0.000238858	0.0302266	0.0303669
C5	0.0219299	0.0041688	0.0376724	0.921128	4.08279	0.00923189	0.00654572	0.0292251	0.000109977	0.483672	0.481202
H6	0.0287566	0.00805539	0.462207	0.018774	0.00923189	0.390102	0.0153796	0.0018166	8.66285e-05	0.000825401	0.000561758
H7	0.0308722	0.00233414	0.467774	0.0189996	0.00654572	0.0153796	0.413151	0.00499603	0.000154876	0.000475044	0.00400318
H8	0.00634506	0.000407937	0.0194911	0.473108	0.0292251	0.0018166	0.00499603	0.406764	4.42999e-05	0.00362778	0.00676634
H9	0.0138406	0.337721	0.000624771	0.000238858	0.000109977	8.66285e-05	0.000154876	4.42999e-05	0.0832459	9.3006e-06	9.30221e-06
H10	0.00110219	0.000424711	0.00641198	0.0302266	0.483672	0.000825401	0.000475044	0.00362778	9.3006e-06	0.409408	0.0168394
H11	0.00139841	0.000216277	0.00631942	0.0303669	0.481202	0.000561758	0.00400318	0.00676634	9.30221e-06	0.0168394	0.412847
LDM — 2_PSA_4_LIDI_matrix
	S1	O2	C3	C4	C5	H6	H7	H8	H9	H10	H11
S1	14.2608	0.570142	0.527235	0.0465369	0.0231619	0.0291522	0.0306005	0.00580541	0.013927	0.00109969	0.00164385	36.5442	11.4551	47.9994
O2	0.570142	8.08238	0.0427969	0.00897781	0.0048118	0.0064842	0.00249876	0.000472204	0.33792	0.000442386	0.000254731
C3	0.527235	0.0427969	4.02021	0.514382	0.0374496	0.465649	0.465953	0.0196783	0.000654984	0.00640506	0.00626632
C4	0.0465369	0.00897781	0.514382	3.97991	0.920296	0.0193148	0.0184385	0.474015	0.000200931	0.0302166	0.0300576
C5	0.0231619	0.0048118	0.0374496	0.920296	4.08089	0.00889011	0.00643205	0.0295134	6.33079e-05	0.48361	0.480629
H6	0.0291522	0.0064842	0.465649	0.0193148	0.00889011	0.40449	0.0154521	0.00196183	0.000270594	0.000846343	0.000557288
H7	0.0306005	0.00249876	0.465953	0.0184385	0.00643205	0.0154521	0.402197	0.00488488	0.000104148	0.000460074	0.00373856
H8	0.00580541	0.000472204	0.0196783	0.474015	0.0295134	0.00196183	0.00488488	0.410796	2.89953e-05	0.0036566	0.00677385
H9	0.013927	0.33792	0.000654984	0.000200931	6.33079e-05	0.000270594	0.000104148	2.89953e-05	0.0833776	6.5999e-06	8.06467e-06
H10	0.00109969	0.000442386	0.00640506	0.0302166	0.48361	0.000846343	0.000460074	0.0036566	6.5999e-06	0.409583	0.0167461
H11	0.00164385	0.000254731	0.00626632	0.0300576	0.480629	0.000557288	0.00373856	0.00677385	8.06467e-06	0.0167461	0.40958
LDM — 2_PSA_5_LIDI_matrix
	S1	O2	C3	C4	C5	H6	H7	H8	H9	H10	H11
S1	14.2669	0.569815	0.533364	0.0415471	0.0193225	0.0267502	0.0323043	0.00346707	0.0138893	0.00155521	0.000927506	36.5443	11.4567	48.001
O2	0.569815	8.07575	0.0435314	0.00820766	0.00169604	0.00799123	0.0048673	0.00762486	0.337354	0.000172899	0.000370093
C3	0.533364	0.0435314	4.0233	0.513127	0.0369	0.464021	0.465288	0.0190544	0.00067458	0.00636207	0.00631829
C4	0.0415471	0.00820766	0.513127	3.9738	0.926033	0.0179857	0.0200048	0.469799	0.000178337	0.0305791	0.0309199
C5	0.0193225	0.00169604	0.0369	0.926033	4.08435	0.00638627	0.00979256	0.0287256	5.16731e-05	0.484129	0.482331
H6	0.0267502	0.00799123	0.464021	0.0179857	0.00638627	0.399963	0.0151173	0.00507472	0.00013343	0.00048282	0.00414867
H7	0.0323043	0.0048673	0.465288	0.0200048	0.00979256	0.0151173	0.405246	0.000926662	0.000316625	0.000763325	0.00044801
H8	0.00346707	0.00762486	0.0190544	0.469799	0.0287256	0.00507472	0.000926662	0.40018	9.89441e-05	0.00362743	0.00667112
H9	0.0138893	0.337354	0.00067458	0.000178337	5.16731e-05	0.00013343	0.000316625	9.89441e-05	0.0831554	6.58471e-06	7.97169e-06
H10	0.00155521	0.000172899	0.00636207	0.0305791	0.484129	0.00048282	0.000763325	0.00362743	6.58471e-06	0.412416	0.0171258
H11	0.000927506	0.000370093	0.00631829	0.0309199	0.482331	0.00414867	0.00044801	0.00667112	7.97169e-06	0.0171258	0.419286
LDM — 2_PSA_6_LIDI_matrix
	S1	O2	C3	C4	C5	H6	H7	H8	H9	H10	H11
S1	14.2568	0.572704	0.531813	0.0406033	0.0213999	0.0283186	0.0311716	0.0068678	0.0140387	0.00157093	0.00132775	36.5281	11.4716	47.9997
O2	0.572704	8.07156	0.043729	0.0117789	0.00697112	0.008037	0.00364248	0.00048853	0.337658	0.000290337	0.000751438
C3	0.531813	0.043729	4.02243	0.514186	0.036734	0.463841	0.465703	0.0197689	0.000679158	0.006315	0.00648103
C4	0.0406033	0.0117789	0.514186	3.96496	0.919913	0.0189261	0.0190596	0.472897	0.000222779	0.0303543	0.0305785
C5	0.0213999	0.00697112	0.036734	0.919913	4.07954	0.00945787	0.0064846	0.0290014	6.99994e-05	0.484103	0.481723
H6	0.0283186	0.008037	0.463841	0.0189261	0.00945787	0.399564	0.0151466	0.00150614	0.000139123	0.000802163	0.000511541
H7	0.0311716	0.00364248	0.465703	0.0190596	0.0064846	0.0151466	0.40868	0.00521021	0.000263245	0.000478978	0.00452026
H8	0.0068678	0.00048853	0.0197689	0.472897	0.0290014	0.00150614	0.00521021	0.410692	4.62975e-05	0.00364701	0.00682905
H9	0.0140387	0.337658	0.000679158	0.000222779	6.99994e-05	0.000139123	0.000263245	4.62975e-05	0.083369	3.22341e-06	1.79415e-05
H10	0.00157093	0.000290337	0.006315	0.0303543	0.484103	0.000802163	0.000478978	0.00364701	3.22341e-06	0.411959	0.017039
H11	0.00132775	0.000751438	0.00648103	0.0305785	0.481723	0.000511541	0.00452026	0.00682905	1.79415e-05	0.017039	0.418532
Weighted Ensemble LDM (Σ w·LDM)
	S1	O2	C3	C4	C5	H6	H7	H8	H9	H10	H11
S1	14.2484	0.571938	0.529126	0.0453378	0.0248512	0.0265848	0.0306979	0.00547012	0.0139356	0.00150923	0.00148531	36.5272	11.4733	48.0005
O2	0.571938	8.07828	0.0446387	0.0131232	0.0111214	0.00780759	0.00476252	0.000807555	0.330349	0.000391968	0.00222344
C3	0.529126	0.0446387	4.02534	0.515039	0.0357089	0.466228	0.463814	0.0197463	0.00067839	0.00631511	0.00612469
C4	0.0453378	0.0131232	0.515039	3.97464	0.915247	0.0188728	0.0190079	0.473986	0.00280017	0.0303634	0.0299077
C5	0.0248512	0.0111214	0.0357089	0.915247	4.09153	0.00781761	0.00626277	0.0293727	0.00358816	0.484432	0.480226
H6	0.0265848	0.00780759	0.466228	0.0188728	0.00781761	0.400414	0.0148094	0.00209116	0.000116471	0.00083553	0.000622234
H7	0.0306979	0.00476252	0.463814	0.0190079	0.00626277	0.0148094	0.395685	0.00468541	9.52585e-05	0.0004436	0.00357282
H8	0.00547012	0.000807555	0.0197463	0.473986	0.0293727	0.00209116	0.00468541	0.412372	0.000108442	0.00366494	0.00679397
H9	0.0139356	0.330349	0.00067839	0.00280017	0.00358816	0.000116471	9.52585e-05	0.000108442	0.080168	9.95338e-05	0.000173869
H10	0.00150923	0.000391968	0.00631511	0.0303634	0.484432	0.00083553	0.0004436	0.00366494	9.95338e-05	0.411631	0.01683
H11	0.00148531	0.00222344	0.00612469	0.0299077	0.480226	0.000622234	0.00357282	0.00679397	0.000173869	0.01683	0.408744
	15.4993	9.06544	6.11276	6.03832	6.09015	0.9462	0.943837	0.959098	0.432113	0.956516	0.956704	48.0005

## Sheet: weighted_LDM
Weighted LDM — 2_PSA_1_LIDI_matrix (× 0.869274)
	S1	O2	C3	C4	C5	H6	H7	H8	H9	H10	H11	Total
S1	12.384	0.497271	0.45974	0.0397543	0.0220535	0.0229199	0.0266047	0.00477788	0.0121206	0.00132442	0.00132	41.7256
O2	0.497271	7.0224	0.0389635	0.0118682	0.0105435	0.00679331	0.00428449	0.000453515	0.286262	0.000353348	0.00216441
C3	0.45974	0.0389635	3.49944	0.447809	0.0308803	0.405586	0.402948	0.0171911	0.000591387	0.00548477	0.00529477
C4	0.0397543	0.0118682	0.447809	3.45533	0.794722	0.0164317	0.0164931	0.412197	0.00276164	0.0263911	0.0259174
C5	0.0220535	0.0105435	0.0308803	0.794722	3.55795	0.00673292	0.00529075	0.0255461	0.00357434	0.421166	0.417274
H6	0.0229199	0.00679331	0.405586	0.0164317	0.00673292	0.348292	0.0128287	0.00171944	9.6166e-05	0.000743345	0.000396114
H7	0.0266047	0.00428449	0.402948	0.0164931	0.00529075	0.0128287	0.342738	0.00419465	6.96406e-05	0.000368338	0.00318617
H8	0.00477788	0.000453515	0.0171911	0.412197	0.0255461	0.00171944	0.00419465	0.358811	8.76701e-05	0.00318671	0.00590687
H9	0.0121206	0.286262	0.000591387	0.00276164	0.00357434	9.6166e-05	6.96406e-05	8.76701e-05	0.0693173	9.85808e-05	0.000171762
H10	0.00132442	0.000353348	0.00548477	0.0263911	0.421166	0.000743345	0.000368338	0.00318671	9.85808e-05	0.357861	0.0146116
H11	0.00132	0.00216441	0.00529477	0.0259174	0.417274	0.000396114	0.00318617	0.00590687	0.000171762	0.0146116	0.354377
Weighted LDM — 2_PSA_2_LIDI_matrix (× 0.0264038)
	S1	O2	C3	C4	C5	H6	H7	H8	H9	H10	H11	Total
S1	0.376656	0.0150673	0.0140639	0.00111475	0.000556609	0.000712328	0.000839163	6.60161e-05	0.000359715	4.07519e-05	2.63105e-05	1.2674
O2	0.0150673	0.213332	0.0011415	0.000215295	4.66416e-05	0.000204377	0.000128363	0.000182101	0.00886102	4.44431e-06	8.80343e-06
C3	0.0140639	0.0011415	0.106263	0.0135825	0.000958569	0.0122561	0.0122369	0.000513434	1.79457e-05	0.000166819	0.000164305
C4	0.00111475	0.000215295	0.0135825	0.104908	0.0244161	0.000479414	0.000522897	0.0124827	1.60684e-05	0.000807276	0.000808775
C5	0.000556609	4.66416e-05	0.000958569	0.0244161	0.107801	0.000166635	0.000237959	0.000791294	6.02252e-06	0.0127811	0.0127193
H6	0.000712328	0.000204377	0.0122561	0.000479414	0.000166635	0.0105649	0.00039003	0.00013744	4.73579e-06	1.26652e-05	0.000107974
H7	0.000839163	0.000128363	0.0122369	0.000522897	0.000237959	0.00039003	0.0103846	3.2077e-05	2.6656e-06	2.08218e-05	1.16874e-05
H8	6.60161e-05	0.000182101	0.000513434	0.0124827	0.000791294	0.00013744	3.2077e-05	0.010988	1.53948e-05	9.83817e-05	0.000179873
H9	0.000359715	0.00886102	1.79457e-05	1.60684e-05	6.02252e-06	4.73579e-06	2.6656e-06	1.53948e-05	0.00215984	3.54805e-07	7.89728e-07
H10	4.07519e-05	4.44431e-06	0.000166819	0.000807276	0.0127811	1.26652e-05	2.08218e-05	9.83817e-05	3.54805e-07	0.0108883	0.000449365
H11	2.63105e-05	8.80343e-06	0.000164305	0.000808775	0.0127193	0.000107974	1.16874e-05	0.000179873	7.89728e-07	0.000449365	0.0109879
Weighted LDM — 2_PSA_3_LIDI_matrix (× 0.0234777)
	S1	O2	C3	C4	C5	H6	H7	H8	H9	H10	H11	Total
S1	0.334858	0.0133957	0.012384	0.00106223	0.000514864	0.000675138	0.000724807	0.000148967	0.000324944	2.5877e-05	3.28315e-05	1.12692
O2	0.0133957	0.189735	0.00101876	0.000199896	9.78737e-05	0.000189122	5.48003e-05	9.57741e-06	0.00792891	9.97123e-06	5.07767e-06
C3	0.012384	0.00101876	0.0944731	0.0120931	0.000884461	0.0108515	0.0109822	0.000457605	1.46682e-05	0.000150538	0.000148365
C4	0.00106223	0.000199896	0.0120931	0.093431	0.021626	0.00044077	0.000446065	0.0111075	5.60783e-06	0.00070965	0.000712943
C5	0.000514864	9.78737e-05	0.000884461	0.021626	0.0958545	0.000216743	0.000153678	0.000686137	2.582e-06	0.0113555	0.0112975
H6	0.000675138	0.000189122	0.0108515	0.00044077	0.000216743	0.00915869	0.000361076	4.26495e-05	2.03384e-06	1.93785e-05	1.31888e-05
H7	0.000724807	5.48003e-05	0.0109822	0.000446065	0.000153678	0.000361076	0.00969984	0.000117295	3.63614e-06	1.11529e-05	9.39855e-05
H8	0.000148967	9.57741e-06	0.000457605	0.0111075	0.000686137	4.26495e-05	0.000117295	0.00954987	1.04006e-06	8.51718e-05	0.000158858
H9	0.000324944	0.00792891	1.46682e-05	5.60783e-06	2.582e-06	2.03384e-06	3.63614e-06	1.04006e-06	0.00195442	2.18356e-07	2.18394e-07
H10	2.5877e-05	9.97123e-06	0.000150538	0.00070965	0.0113555	1.93785e-05	1.11529e-05	8.51718e-05	2.18356e-07	0.00961195	0.000395349
H11	3.28315e-05	5.07767e-06	0.000148365	0.000712943	0.0112975	1.31888e-05	9.39855e-05	0.000158858	2.18394e-07	0.000395349	0.00969268
Weighted LDM — 2_PSA_4_LIDI_matrix (× 0.018147)
	S1	O2	C3	C4	C5	H6	H7	H8	H9	H10	H11	Total
S1	0.258791	0.0103464	0.00956774	0.000844506	0.00042032	0.000529025	0.000555307	0.000105351	0.000252733	1.99562e-05	2.9831e-05	0.871046
O2	0.0103464	0.146671	0.000776637	0.000162921	8.73199e-05	0.000117669	4.5345e-05	8.5691e-06	0.00613224	8.028e-06	4.62262e-06
C3	0.00956774	0.000776637	0.0729549	0.0093345	0.000679598	0.00845015	0.00845567	0.000357102	1.1886e-05	0.000116233	0.000113715
C4	0.000844506	0.000162921	0.0093345	0.0722236	0.0167006	0.000350507	0.000334604	0.00860197	3.64631e-06	0.000548342	0.000545456
C5	0.00042032	8.73199e-05	0.000679598	0.0167006	0.0740561	0.000161329	0.000116723	0.000535581	1.14885e-06	0.00877609	0.00872199
H6	0.000529025	0.000117669	0.00845015	0.000350507	0.000161329	0.00734029	0.000280409	3.56013e-05	4.91047e-06	1.53586e-05	1.01131e-05
H7	0.000555307	4.5345e-05	0.00845567	0.000334604	0.000116723	0.000280409	0.00729868	8.8646e-05	1.88998e-06	8.34897e-06	6.78437e-05
H8	0.000105351	8.5691e-06	0.000357102	0.00860197	0.000535581	3.56013e-05	8.8646e-05	0.00745472	5.26179e-07	6.63565e-05	0.000122925
H9	0.000252733	0.00613224	1.1886e-05	3.64631e-06	1.14885e-06	4.91047e-06	1.88998e-06	5.26179e-07	0.00151306	1.19769e-07	1.4635e-07
H10	1.99562e-05	8.028e-06	0.000116233	0.000548342	0.00877609	1.53586e-05	8.34897e-06	6.63565e-05	1.19769e-07	0.00743271	0.000303892
H11	2.9831e-05	4.62262e-06	0.000113715	0.000545456	0.00872199	1.01131e-05	6.78437e-05	0.000122925	1.4635e-07	0.000303892	0.00743267
Weighted LDM — 2_PSA_5_LIDI_matrix (× 0.0172585)
	S1	O2	C3	C4	C5	H6	H7	H8	H9	H10	H11	Total
S1	0.246224	0.00983413	0.00920504	0.00071704	0.000333477	0.000461668	0.000557522	5.98364e-05	0.000239708	2.68406e-05	1.60073e-05	0.828425
O2	0.00983413	0.139375	0.000751285	0.000141652	2.92711e-05	0.000137916	8.40021e-05	0.000131593	0.00582222	2.98397e-06	6.38724e-06
C3	0.00920504	0.000751285	0.0694361	0.00885578	0.000636838	0.00800829	0.00803016	0.000328849	1.16422e-05	0.0001098	0.000109044
C4	0.00071704	0.000141652	0.00885578	0.0685817	0.0159819	0.000310405	0.000345252	0.00810801	3.07782e-06	0.000527749	0.000533631
C5	0.000333477	2.92711e-05	0.000636838	0.0159819	0.0704896	0.000110217	0.000169005	0.00049576	8.91799e-07	0.00835533	0.0083243
H6	0.000461668	0.000137916	0.00800829	0.000310405	0.000110217	0.00690276	0.000260901	8.75819e-05	2.30279e-06	8.33273e-06	7.15998e-05
H7	0.000557522	8.40021e-05	0.00803016	0.000345252	0.000169005	0.000260901	0.00699393	1.59928e-05	5.46446e-06	1.31738e-05	7.73197e-06
H8	5.98364e-05	0.000131593	0.000328849	0.00810801	0.00049576	8.75819e-05	1.59928e-05	0.0069065	1.70762e-06	6.2604e-05	0.000115133
H9	0.000239708	0.00582222	1.16422e-05	3.07782e-06	8.91799e-07	2.30279e-06	5.46446e-06	1.70762e-06	0.00143514	1.13642e-07	1.37579e-07
H10	2.68406e-05	2.98397e-06	0.0001098	0.000527749	0.00835533	8.33273e-06	1.31738e-05	6.2604e-05	1.13642e-07	0.00711767	0.000295565
H11	1.60073e-05	6.38724e-06	0.000109044	0.000533631	0.0083243	7.15998e-05	7.73197e-06	0.000115133	1.37579e-07	0.000295565	0.00723623
Weighted LDM — 2_PSA_6_LIDI_matrix (× 0.0454394)
	S1	O2	C3	C4	C5	H6	H7	H8	H9	H10	H11	Total
S1	0.647822	0.0260234	0.0241653	0.00184499	0.000972401	0.00128678	0.00141642	0.000312069	0.000637912	7.13821e-05	6.03324e-05	2.18108
O2	0.0260234	0.366767	0.00198702	0.000535229	0.000316764	0.000365197	0.000165512	2.21985e-05	0.015343	1.31928e-05	3.41449e-05
C3	0.0241653	0.00198702	0.182777	0.0233643	0.00166917	0.0210767	0.0211613	0.000898286	3.08605e-05	0.00028695	0.000294494
C4	0.00184499	0.000535229	0.0233643	0.180166	0.0418003	0.000859993	0.000866055	0.0214882	1.01229e-05	0.00137928	0.00138947
C5	0.000972401	0.000316764	0.00166917	0.0418003	0.185372	0.00042976	0.000294657	0.00131781	3.18073e-06	0.0219974	0.0218892
H6	0.00128678	0.000365197	0.0210767	0.000859993	0.00042976	0.0181559	0.000688253	6.84381e-05	6.32169e-06	3.64499e-05	2.32441e-05
H7	0.00141642	0.000165512	0.0211613	0.000866055	0.000294657	0.000688253	0.0185702	0.000236749	1.19617e-05	2.17645e-05	0.000205398
H8	0.000312069	2.21985e-05	0.000898286	0.0214882	0.00131781	6.84381e-05	0.000236749	0.0186616	2.10373e-06	0.000165718	0.000310308
H9	0.000637912	0.015343	3.08605e-05	1.01229e-05	3.18073e-06	6.32169e-06	1.19617e-05	2.10373e-06	0.00378824	1.4647e-07	8.15252e-07
H10	7.13821e-05	1.31928e-05	0.00028695	0.00137928	0.0219974	3.64499e-05	2.17645e-05	0.000165718	1.4647e-07	0.0187192	0.000774243
H11	6.03324e-05	3.41449e-05	0.000294494	0.00138947	0.0218892	2.32441e-05	0.000205398	0.000310308	8.15252e-07	0.000774243	0.0190179

## Sheet: FD
Frobenius_Distance_Full_MATRIX
Conformer ID	1	2	3	4	5	6
1	0	0.0390884	0.0398819	0.032441	0.0466336	0.0358036
2		0	0.0331355	0.027192	0.0221368	0.03067
3			0	0.0207104	0.0293134	0.0260995
4				0	0.0311972	0.0265672
5					0	0.0293052
6						0
