# Supplementary material for: Comparative Analysis of Molecular Conformers Using Localization–Delocalization Matrices and Frobenius Distance
Source: Research Square preprint supplement (doi:10.21203/rs.3.rs-7999250/v1), 2025-11-18
Supplement: Supplementary file 3 [file 4c0633741c4901522a7e89cd.xlsx]

## Sheet: Boltzman_Distribution
Conformer ID	E (HF)	Delta E(HF)	HF Conversion	Boltzman distribution	Boltzman weight	% (percentage)	Conformer_type	FD_R	FD_W	NLoc	NDeloc
1	-1106.19	0	0	1	0.268583	0.268583	2 RCP	0	0.0637218	64.1413	21.8606
2	-1106.19	0.0003078	0.193145	0.721658	0.193825	0.193825	2 RCP	0.10752	0.055772	64.1553	21.8434
3	-1106.19	0.0004594	0.288275	0.614548	0.165057	0.165057	Acylic	0.109616	0.0572013	64.1335	21.866
4	-1106.19	0.0010568	0.663145	0.326284	0.0876341	0.0876341	2 RCP	0.0709883	0.0824089	64.1389	21.862
5	-1106.19	0.0017251	1.08251	0.160695	0.0431598	0.0431598	Acylic	0.125483	0.0712648	64.1391	21.8592
6	-1106.19	0.0017932	1.12524	0.149506	0.0401547	0.0401547	1 RCP	0.13391	0.0787145	64.1347	21.8658
7	-1106.19	0.0020627	1.29435	0.112362	0.0301783	0.0301783	Acylic	0.124203	0.0653135	64.1564	21.8448
8	-1106.19	0.0024033	1.50808	0.0783164	0.0210344	0.0210344	Acylic	0.106639	0.0928285	64.1202	21.881
9	-1106.19	0.0025559	1.60383	0.0666218	0.0178935	0.0178935	1RCP	0.137233	0.0817817	64.1344	21.8659
10	-1106.19	0.0027582	1.73078	0.0537657	0.0144405	0.0144405	1RCP	0.106782	0.0722449	64.1415	21.8575
11	-1106.19	0.0028281	1.77464	0.0499267	0.0134094	0.0134094	1RCP	0.0872742	0.0787832	64.1588	21.8403
12	-1106.19	0.0028325	1.7774	0.0496945	0.0133471	0.0133471	1 RCP	0.127659	0.0692768	64.1496	21.8514
13	-1106.19	0.0029289	1.83789	0.0448682	0.0120508	0.0120508	1RCP	0.080884	0.0751796	64.1366	21.8618
14	-1106.19	0.0031812	1.99621	0.0343411	0.00922343	0.00922343	2 RCP	0.10585	0.0694711	64.1498	21.8499
15	-1106.19	0.0034478	2.1635	0.0258886	0.00695323	0.00695323	2 RCP	0.108513	0.0604051	64.15	21.8486
16	-1106.19	0.0035075	2.20097	0.0243014	0.00652693	0.00652693	Acylic	0.107334	0.0568069	64.1433	21.8556
17	-1106.19	0.003699	2.32113	0.0198377	0.00532806	0.00532806	Acylic	0.122089	0.0708111	64.1413	21.859
18	-1106.19	0.003706	2.32553	0.0196911	0.00528868	0.00528868	Acylic	0.0778573	0.0749449	64.1653	21.8354
19	-1106.19	0.0040361	2.53266	0.0138783	0.00372747	0.00372747	Acylic	0.0688668	0.0840284	64.158	21.8402
20	-1106.19	0.0041165	2.58312	0.0127448	0.00342302	0.00342302	1 RCP	0.126145	0.099992	64.1165	21.8819
21	-1106.19	0.0042092	2.64129	0.0115522	0.00310272	0.00310272	Acylic	0.12604	0.0964532	64.1305	21.8694
22	-1106.19	0.0042684	2.67843	0.0108497	0.00291404	0.00291404	2 RCP	0.125066	0.105432	64.1211	21.879
23	-1106.19	0.0042972	2.69651	0.0105236	0.00282644	0.00282644	2 RCP	0.119479	0.0960821	64.1461	21.853
24	-1106.19	0.0043091	2.70397	0.0103917	0.00279102	0.00279102	Acylic	0.123188	0.10256	64.13	21.8698
25	-1106.19	0.0043528	2.7314	0.00992137	0.00266471	0.00266471	Acylic	0.122017	0.103672	64.1226	21.8759
26	-1106.18	0.0045545	2.85796	0.00801193	0.00215186	0.00215186	Acylic	0.122062	0.0996775	64.1386	21.8615
27	-1106.18	0.0046054	2.8899	0.00759119	0.00203886	0.00203886	1RCP	0.075448	0.0889887	64.1364	21.8628
28	-1106.18	0.0048267	3.02877	0.00600418	0.00161262	0.00161262	Acylic	0.0659256	0.0812706	64.1522	21.8471
29	-1106.18	0.0048932	3.0705	0.0055956	0.00150288	0.00150288	1 RCP	0.117262	0.0910508	64.1343	21.8661
30	-1106.18	0.0049642	3.11505	0.00519	0.00139394	0.00139394	1RCP	0.107883	0.0741237	64.1561	21.8419
31	-1106.18	0.0049819	3.12616	0.00509356	0.00136804	0.00136804	2 RCP	0.12281	0.103619	64.1291	21.8713
32	-1106.18	0.0050008	3.13802	0.00499255	0.00134091	0.00134091	1RCP	0.110631	0.0761934	64.1513	21.8478
33	-1106.18	0.0050027	3.13921	0.0049825	0.00133821	0.00133821	Acylic	0.109819	0.0714453	64.1686	21.8312
34	-1106.18	0.0051336	3.22135	0.0043371	0.00116487	0.00116487	Acylic	0.118564	0.100833	64.1358	21.8649
35	-1106.18	0.0052039	3.26546	0.00402571	0.00108124	0.00108124	Acylic	0.116666	0.0947992	64.1544	21.8461
36	-1106.18	0.0052039	3.26546	0.00402571	0.00108124	0.00108124	Acylic	0.110568	0.0901858	64.1539	21.8446
37	-1106.18	0.0052165	3.27337	0.00397231	0.00106689	0.00106689	Acylic	0.115803	0.0813748	64.1269	21.8728
38	-1106.18	0.0053165	3.33612	0.00357287	0.000959611	0.000959611	Acylic	0.119274	0.0988026	64.115	21.8857
39	-1106.18	0.0053701	3.36975	0.00337557	0.00090662	0.00090662	Acylic	0.0802884	0.0807379	64.1537	21.8473
40	-1106.18	0.0053706	3.37007	0.00337378	0.000906139	0.000906139	Acylic	0.116116	0.0664208	64.153	21.8457
41	-1106.18	0.0053957	3.38582	0.00328522	0.000882353	0.000882353	1 RCP	0.127476	0.104122	64.1201	21.8816
42	-1106.18	0.0054352	3.4106	0.00315054	0.000846179	0.000846179	2 RCP	0.0900523	0.0785715	64.1533	21.8473
43	-1106.18	0.0054424	3.41512	0.00312659	0.000839746	0.000839746	Acylic	0.0808922	0.0767671	64.1467	21.8547
44	-1106.18	0.0054601	3.42623	0.00306848	0.000824141	0.000824141	1RCP	0.116271	0.0735203	64.1636	21.8377
45	-1106.18	0.0058625	3.67874	0.00200315	0.000538012	0.000538012	Acylic	0.114846	0.089691	64.1505	21.8493
46	-1106.18	0.0059469	3.7317	0.00183176	0.000491978	0.000491978	Acylic	0.112967	0.0938587	64.1431	21.8585
47	-1106.18	0.0075564	4.74166	0.000332718	8.93623e-05	8.93623e-05	2 RCP	0.117754	0.0897614	64.14	21.8585
48	-1106.18	0.0089002	5.5849	8.00897e-05	2.15107e-05	2.15107e-05	Acylic	0.101589	0.0964217	64.141	21.8597
49	-1106.18	0.0091574	5.7463	6.09814e-05	1.63785e-05	1.63785e-05	1 RCP	0.132285	0.114405	64.1229	21.8756
					1	1				64.1426	21.8576

## Sheet: LDM
LDM — alliciin_conf_1_LIDI_matrix
	S1	S2	O3	C4	C5	C6	C7	H8	H9	H10	H11	H12	H13	C14	H15	H16	C17	H18	H19		NLoc	NDeloc
S1	12.9495	0.508686	0.694412	0.0314792	0.00255076	0.0205062	0.00158437	0.00157589	0.000315509	0.0011776	0.000948476	9.28435e-05	0.000431275	0.464893	0.023596	0.0227703	0.0251169	0.00598493	0.00664377		64.1413	21.8606	86.0019
S2	0.508686	14.7658	0.0968622	0.0157961	0.0412681	0.00363626	0.0201434	0.013499	0.00593762	0.00038789	0.000147205	0.00155205	0.00115253	0.0350153	0.00424485	0.00818946	0.540892	0.02615	0.0289609
O3	0.694412	0.0968622	8.28033	0.00988855	0.0018231	0.0060614	0.00315312	0.000562033	0.000516253	0.000365851	0.000497725	0.000235551	0.00386114	0.0617743	0.0053989	0.0048511	0.0199814	0.0284518	0.00182681
C4	0.0314792	0.0157961	0.00988855	3.98019	0.000462669	0.918711	0.000384446	0.469192	7.70337e-05	0.0302233	0.0299	9.06297e-06	4.85551e-05	0.519459	0.0168866	0.018014	0.000633429	0.00012306	0.000108286
C5	0.00255076	0.0412681	0.0018231	0.000462669	3.9737	0.000192435	0.91483	0.000534975	0.47425	2.96991e-05	2.89139e-05	0.0304794	0.0294116	0.00507969	0.0110509	0.000327264	0.515319	0.0166616	0.0192826
C6	0.0205062	0.00363626	0.0060614	0.918711	0.000192435	4.08153	0.000287603	0.0285368	1.94766e-05	0.481157	0.483152	6.6237e-06	2.7458e-05	0.0383442	0.00716184	0.00673069	0.000363769	5.92568e-05	2.74509e-05
C7	0.00158437	0.0201434	0.00315312	0.000384446	0.91483	0.000287603	4.08567	0.00017389	0.0293933	1.98295e-05	3.36125e-05	0.484144	0.476939	0.00579939	0.0140866	0.000287309	0.0363428	0.00580206	0.00932389
H8	0.00157589	0.013499	0.000562033	0.469192	0.000534975	0.0285368	0.00017389	0.395315	0.000188373	0.0065739	0.00358218	8.38052e-06	1.15324e-05	0.0190108	0.00178316	0.00449905	0.000377718	0.000112131	4.90875e-05
H9	0.000315509	0.00593762	0.000516253	7.70337e-05	0.47425	1.94766e-05	0.0293933	0.000188373	0.414629	6.03985e-06	2.08278e-06	0.00364623	0.00666229	0.000138846	0.000298942	1.22963e-05	0.0199256	0.0046106	0.00125563
H10	0.0011776	0.00038789	0.000365851	0.0302233	2.96991e-05	0.481157	1.98295e-05	0.0065739	6.03985e-06	0.412215	0.016758	5.9996e-07	1.5373e-06	0.00631376	0.000444537	0.00361053	3.07962e-05	5.04225e-06	5.13683e-06
H11	0.000948476	0.000147205	0.000497725	0.0299	2.89139e-05	0.483152	3.36125e-05	0.00358218	2.08278e-06	0.016758	0.406803	6.76898e-07	3.4958e-06	0.00638082	0.000760856	0.000469221	1.58592e-05	2.76516e-06	8.10123e-07
H12	9.28435e-05	0.00155205	0.000235551	9.06297e-06	0.0304794	6.6237e-06	0.484144	8.38052e-06	0.00364623	5.9996e-07	6.76898e-07	0.412169	0.0164681	0.000107073	0.000438486	7.85676e-06	0.00631136	0.000411624	0.000804065
H13	0.000431275	0.00115253	0.00386114	4.85551e-05	0.0294116	2.7458e-05	0.476939	1.15324e-05	0.00666229	1.5373e-06	3.4958e-06	0.0164681	0.396824	0.000395169	0.00118147	1.52776e-05	0.00596885	0.00358258	0.000447023
C14	0.464893	0.0350153	0.0617743	0.519459	0.00507969	0.0383442	0.00579939	0.0190108	0.000138846	0.00631376	0.00638082	0.000107073	0.000395169	4.07213	0.451747	0.463011	0.00156356	0.000194173	0.00036273
H15	0.023596	0.00424485	0.0053989	0.0168866	0.0110509	0.00716184	0.0140866	0.00178316	0.000298942	0.000444537	0.000760856	0.000438486	0.00118147	0.451747	0.359218	0.013555	0.000913935	7.35113e-05	0.000121532
H16	0.0227703	0.00818946	0.0048511	0.018014	0.000327264	0.00673069	0.000287309	0.00449905	1.22963e-05	0.00361053	0.000469221	7.85676e-06	1.52776e-05	0.463011	0.013555	0.393276	0.000268633	4.00772e-05	0.000182699
C17	0.0251169	0.540892	0.0199814	0.000633429	0.515319	0.000363769	0.0363428	0.000377718	0.0199256	3.07962e-05	1.58592e-05	0.00631136	0.00596885	0.00156356	0.000913935	0.000268633	4.02905	0.442023	0.46375
H18	0.00598493	0.02615	0.0284518	0.00012306	0.0166616	5.92568e-05	0.00580206	0.000112131	0.0046106	5.04225e-06	2.76516e-06	0.000411624	0.00358258	0.000194173	7.35113e-05	4.00772e-05	0.442023	0.342068	0.0130238
H19	0.00664377	0.0289609	0.00182681	0.000108286	0.0192826	2.74509e-05	0.00932389	4.90875e-05	0.00125563	5.13683e-06	8.10123e-07	0.000804065	0.000447023	0.00036273	0.000121532	0.000182699	0.46375	0.0130238	0.390775
Total	14.7623	16.1184	9.22085	6.04158	6.03729	6.07651	6.0884	0.945586	0.961885	0.959325	0.949489	0.956894	0.943432	6.15172	0.912962	0.940118	6.10885	0.889379	0.936951	86.0019
LDM — alliciin_conf_2_LIDI_matrix
	S1	S2	O3	C4	C5	C6	C7	H8	H9	H10	H11	H12	H13	C14	H15	H16	C17	H18	H19
S1	12.954	0.508463	0.693427	0.0327339	0.00259404	0.0186644	0.00167781	0.00179701	0.000321498	0.000831756	0.00100612	0.000533908	0.000100492	0.466447	0.0238177	0.0214286	0.0247442	0.006608	0.00586745		64.1553	21.8434	85.9987
S2	0.508463	14.7856	0.096047	0.00856425	0.0413391	0.00376717	0.0206695	0.000439666	0.00563851	0.000222195	0.000449773	0.00116217	0.00155035	0.0387336	0.0065554	0.00819005	0.54077	0.0289772	0.0265562
O3	0.693427	0.096047	8.27407	0.0108748	0.00219354	0.0037326	0.00445732	0.00607784	0.000502458	0.000401981	0.000221324	0.0055011	0.000323149	0.0606253	0.00457117	0.00817394	0.0200346	0.00182234	0.0278302
C4	0.0327339	0.00856425	0.0108748	3.9829	0.000386856	0.920728	0.00037363	0.470257	1.37417e-05	0.0304287	0.0300105	7.4557e-05	1.10911e-05	0.517589	0.0172208	0.0175309	0.00038314	0.000204154	5.7177e-05
C5	0.00259404	0.0413391	0.00219354	0.000386856	3.97354	0.0003285	0.914154	5.46735e-05	0.47431	1.73983e-05	3.4342e-05	0.0291954	0.0305045	0.00530211	0.0120568	0.000282486	0.515252	0.0191589	0.0167147
C6	0.0186644	0.00376717	0.0037326	0.920728	0.0003285	4.0807	0.000285502	0.0284995	1.43358e-05	0.481395	0.483109	2.04796e-05	7.42219e-06	0.0383165	0.00851883	0.00635887	0.000208532	0.000122294	3.21868e-05
C7	0.00167781	0.0206695	0.00445732	0.00037363	0.914154	0.000285502	4.08503	0.000123213	0.0293364	1.86314e-05	3.02216e-05	0.476015	0.48421	0.00571671	0.0138776	0.000305464	0.0362579	0.00903143	0.00575064
H8	0.00179701	0.000439666	0.00607784	0.470257	5.46735e-05	0.0284995	0.000123213	0.395321	5.84249e-06	0.00662183	0.0035812	0.000100309	4.38678e-06	0.0190306	0.00133917	0.00494819	3.33545e-05	7.40007e-06	1.1068e-05
H9	0.000321498	0.00563851	0.000502458	1.37417e-05	0.47431	1.43358e-05	0.0293364	5.84249e-06	0.41425	7.42043e-07	9.8013e-07	0.00661966	0.00363898	0.000145894	0.000399977	1.74263e-05	0.0199662	0.00133582	0.0046015
H10	0.000831756	0.000222195	0.000401981	0.0304287	1.73983e-05	0.481395	1.86314e-05	0.00662183	7.42043e-07	0.413675	0.0168056	6.13675e-06	5.15665e-07	0.00636464	0.000439462	0.00395846	1.21503e-05	6.35163e-06	1.83001e-06
H11	0.00100612	0.000449773	0.000221324	0.0300105	3.4342e-05	0.483109	3.02216e-05	0.0035812	9.8013e-07	0.0168056	0.407107	2.26971e-06	8.94022e-07	0.00636968	0.000714056	0.000454777	1.52752e-05	1.04594e-05	1.85451e-06
H12	0.000533908	0.00116217	0.0055011	7.4557e-05	0.0291954	2.04796e-05	0.476015	0.000100309	0.00661966	6.13675e-06	2.26971e-06	0.394098	0.0163719	0.000325105	0.000859777	2.81734e-05	0.0058515	0.000441136	0.00346314
H13	0.000100492	0.00155035	0.000323149	1.10911e-05	0.0305045	7.42219e-06	0.48421	4.38678e-06	0.00363898	5.15665e-07	8.94022e-07	0.0163719	0.412473	0.000110953	0.000453122	5.44614e-06	0.00630686	0.000811969	0.000401657
C14	0.466447	0.0387336	0.0606253	0.517589	0.00530211	0.0383165	0.00571671	0.0190306	0.000145894	0.00636464	0.00636968	0.000325105	0.000110953	4.07022	0.449766	0.463901	0.00161247	0.000348352	0.000227032
H15	0.0238177	0.0065554	0.00457117	0.0172208	0.0120568	0.00851883	0.0138776	0.00133917	0.000399977	0.000439462	0.000714056	0.000859777	0.000453122	0.449766	0.356798	0.0134348	0.000950774	0.000113581	6.6676e-05
H16	0.0214286	0.00819005	0.00817394	0.0175309	0.000282486	0.00635887	0.000305464	0.00494819	1.74263e-05	0.00395846	0.000454777	2.81734e-05	5.44614e-06	0.463901	0.0134348	0.394606	0.00038965	5.92695e-05	9.34581e-05
C17	0.0247442	0.54077	0.0200346	0.00038314	0.515252	0.000208532	0.0362579	3.33545e-05	0.0199662	1.21503e-05	1.52752e-05	0.0058515	0.00630686	0.00161247	0.000950774	0.00038965	4.02654	0.463969	0.442475
H18	0.006608	0.0289772	0.00182234	0.000204154	0.0191589	0.000122294	0.00903143	7.40007e-06	0.00133582	6.35163e-06	1.04594e-05	0.000441136	0.000811969	0.000348352	0.000113581	5.92695e-05	0.463969	0.391167	0.013049
H19	0.00586745	0.0265562	0.0278302	5.7177e-05	0.0167147	3.21868e-05	0.00575064	1.1068e-05	0.0046015	1.83001e-06	1.85451e-06	0.00346314	0.000401657	0.000227032	6.6676e-05	9.34581e-05	0.442475	0.013049	0.343104
Total	14.7651	16.1237	9.22089	6.04034	6.03742	6.07481	6.08732	0.938254	0.96112	0.961209	0.949925	0.94067	0.957286	6.15115	0.911953	0.944166	6.10577	0.937244	0.890305	85.9987
LDM — alliciin_conf_3_LIDI_matrix
	S1	S2	O3	C4	C5	C6	C7	H8	H9	H10	H11	H12	H13	C14	H15	H16	C17	H18	H19
S1	12.9649	0.511006	0.693965	0.0307674	0.00261931	0.0176092	0.00162277	0.00317267	0.00031818	0.000947926	0.000885181	9.63094e-05	0.000522616	0.463183	0.0229367	0.0227672	0.0252795	0.00664523	0.00602446		64.1335	21.866	85.9994
S2	0.511006	14.7515	0.0961467	0.0131084	0.0414219	0.0153679	0.0206966	0.00050719	0.00538462	0.000394879	0.00580939	0.00154349	0.0011413	0.0356821	0.00637832	0.00759327	0.540519	0.0289713	0.0260805
O3	0.693965	0.0961467	8.27801	0.00920645	0.00200574	0.00570987	0.00398087	0.000533138	0.000524205	0.000537808	0.000319975	0.000301486	0.00514882	0.0614052	0.00389203	0.00656535	0.0205684	0.00182477	0.0290705
C4	0.0307674	0.0131084	0.00920645	3.98133	0.000366781	0.916262	0.000410941	0.475012	4.25649e-05	0.0300131	0.0292688	8.93438e-06	5.44211e-05	0.521029	0.0164326	0.0186615	0.000640964	0.000103542	0.000124492
C5	0.00261931	0.0414219	0.00200574	0.000366781	3.97384	0.000479084	0.914508	0.000193566	0.474493	4.59785e-05	0.00108732	0.0305582	0.0291817	0.00493581	0.0112314	0.000263588	0.515052	0.0192256	0.016652
C6	0.0176092	0.0153679	0.00570987	0.916262	0.000479084	4.0688	0.000192884	0.0298228	0.00021646	0.483041	0.477782	9.22642e-06	1.57175e-05	0.0375334	0.00576541	0.00821429	0.000586456	4.87042e-05	0.000136679
C7	0.00162277	0.0206966	0.00398087	0.000410941	0.914508	0.000192884	4.08544	0.00020979	0.0295406	1.14885e-05	0.000446873	0.48432	0.476074	0.00564405	0.0135082	0.000228237	0.0361372	0.0089664	0.00570864
H8	0.00317267	0.00050719	0.000533138	0.475012	0.000193566	0.0298228	0.00020979	0.413155	2.20904e-05	0.00368669	0.00666606	4.87446e-06	1.2874e-05	0.0200943	0.00439823	0.00186688	5.05488e-05	9.55534e-06	8.87072e-06
H9	0.00031818	0.00538462	0.000524205	4.25649e-05	0.474493	0.00021646	0.0295406	2.20904e-05	0.416148	2.60185e-05	0.000495989	0.00365716	0.00664346	0.000128584	0.000337847	8.43094e-06	0.0199756	0.00136962	0.00456806
H10	0.000947926	0.000394879	0.000537808	0.0300131	4.59785e-05	0.483041	1.14885e-05	0.00368669	2.60185e-05	0.407883	0.0164219	7.55742e-07	1.25626e-06	0.00628595	0.000389376	0.000783248	1.76735e-05	8.37678e-07	4.48021e-06
H11	0.000885181	0.00580939	0.000319975	0.0292688	0.00108732	0.477782	0.000446873	0.00666606	0.000495989	0.0164219	0.402783	2.2692e-05	2.24052e-05	0.00594854	0.00309922	0.000465606	0.000167818	1.61203e-05	5.99549e-05
H12	9.63094e-05	0.00154349	0.000301486	8.93438e-06	0.0305582	9.22642e-06	0.48432	4.87446e-06	0.00365716	7.55742e-07	2.2692e-05	0.413082	0.0163889	0.000108199	0.000437338	6.86286e-06	0.00631186	0.00081673	0.000398327
H13	0.000522616	0.0011413	0.00514882	5.44211e-05	0.0291817	1.57175e-05	0.476074	1.2874e-05	0.00664346	1.25626e-06	2.24052e-05	0.0163889	0.394027	0.000410527	0.000966838	3.73118e-05	0.00585341	0.000441689	0.00341766
C14	0.463183	0.0356821	0.0614052	0.521029	0.00493581	0.0375334	0.00564405	0.0200943	0.000128584	0.00628595	0.00594854	0.000108199	0.000410527	4.0708	0.451298	0.463171	0.00147064	0.000376128	0.000204432
H15	0.0229367	0.00637832	0.00389203	0.0164326	0.0112314	0.00576541	0.0135082	0.00439823	0.000337847	0.000389376	0.00309922	0.000437338	0.000966838	0.451298	0.359639	0.0135864	0.000919557	0.000117076	5.90931e-05
H16	0.0227672	0.00759327	0.00656535	0.0186615	0.000263588	0.00821429	0.000228237	0.00186688	8.43094e-06	0.000783248	0.000465606	6.86286e-06	3.73118e-05	0.463171	0.0135864	0.390451	0.000249219	0.000169077	3.4521e-05
C17	0.0252795	0.540519	0.0205684	0.000640964	0.515052	0.000586456	0.0361372	5.05488e-05	0.0199756	1.76735e-05	0.000167818	0.00631186	0.00585341	0.00147064	0.000919557	0.000249219	4.02874	0.464161	0.441626
H18	0.00664523	0.0289713	0.00182477	0.000103542	0.0192256	4.87042e-05	0.0089664	9.55534e-06	0.00136962	8.37678e-07	1.61203e-05	0.00081673	0.000441689	0.000376128	0.000117076	0.000169077	0.464161	0.391856	0.0129984
H19	0.00602446	0.0260805	0.0290705	0.000124492	0.016652	0.000136679	0.00570864	8.87072e-06	0.00456806	4.48021e-06	5.99549e-05	0.000398327	0.00341766	0.000204432	5.90931e-05	3.4521e-05	0.441626	0.0129984	0.341039
Total	14.7753	16.1093	9.21971	6.04284	6.03816	6.06759	6.08765	0.959427	0.9639	0.950494	0.951769	0.958073	0.940363	6.1497	0.915393	0.935123	6.10833	0.938117	0.888217	85.9994
LDM — alliciin_conf_4_LIDI_matrix
	S1	S2	O3	C4	C5	C6	C7	H8	H9	H10	H11	H12	H13	C14	H15	H16	C17	H18	H19
S1	12.962	0.517581	0.693055	0.0280059	0.00518362	0.0180039	0.00270385	0.00184362	0.000238591	0.000816755	0.00137003	0.000151102	0.000358356	0.466175	0.0233286	0.0209028	0.0244851	0.00744014	0.00231334		64.1389	21.862	86.0008
S2	0.517581	14.7585	0.0961326	0.01052	0.0449295	0.00725636	0.0204757	0.000366706	0.00763903	0.00200753	0.000296645	0.00120949	0.00127461	0.0381335	0.00841274	0.00788922	0.535326	0.0250054	0.0290111
O3	0.693055	0.0961326	8.27467	0.0124612	0.00176483	0.00290925	0.00163067	0.00914808	0.000193702	0.000414753	0.000253192	8.44272e-05	0.000128432	0.0614097	0.00410017	0.00823807	0.0190368	0.0325483	0.000958391
C4	0.0280059	0.01052	0.0124612	3.96956	0.000715431	0.913219	0.000106257	0.467304	0.000126507	0.0299886	0.0301392	1.94722e-05	2.05576e-05	0.517776	0.0190407	0.0172643	0.00664557	0.0022511	0.00614569
C5	0.00518362	0.0449295	0.00176483	0.000715431	3.9713	0.000707715	0.921827	7.89626e-05	0.47195	3.72565e-05	2.60415e-05	0.0306435	0.0303894	0.000481149	0.000223978	9.25124e-05	0.515815	0.016961	0.0178722
C6	0.0180039	0.00725636	0.00290925	0.913219	0.000707715	4.07246	5.07812e-05	0.0278442	0.00016984	0.480345	0.482984	2.98243e-05	1.60825e-05	0.0376837	0.00976124	0.00596309	0.00561916	0.000791518	0.00778659
C7	0.00270385	0.0204757	0.00163067	0.000106257	0.921827	5.07812e-05	4.0865	3.12889e-05	0.028739	6.24539e-06	4.77144e-06	0.481795	0.484075	0.000220107	0.000136873	5.57987e-05	0.0379363	0.00875244	0.00627301
H8	0.00184362	0.000366706	0.00914808	0.467304	7.89626e-05	0.0278442	3.12889e-05	0.389197	4.00716e-06	0.00646108	0.00354255	1.78385e-06	4.15204e-06	0.0189416	0.00116917	0.004921	0.000799307	0.00100215	0.000268246
H9	0.000238591	0.00763903	0.000193702	0.000126507	0.47195	0.00016984	0.028739	4.00716e-06	0.405282	6.27009e-06	1.11175e-05	0.00676596	0.00360998	9.64731e-05	1.86966e-05	1.03419e-05	0.0194921	0.00134425	0.00491903
H10	0.000816755	0.00200753	0.000414753	0.0299886	3.72565e-05	0.480345	6.24539e-06	0.00646108	6.27009e-06	0.410092	0.0167606	1.09998e-06	1.07425e-06	0.00626913	0.000473217	0.00380497	0.000150768	3.28522e-05	0.000235189
H11	0.00137003	0.000296645	0.000253192	0.0301392	2.60415e-05	0.482984	4.77144e-06	0.00354255	1.11175e-05	0.0167606	0.408776	3.50484e-06	9.19041e-07	0.00633679	0.000759396	0.000436047	0.000223743	3.45487e-05	0.000575307
H12	0.000151102	0.00120949	8.44272e-05	1.94722e-05	0.0306435	2.98243e-05	0.481795	1.78385e-06	0.00676596	1.09998e-06	3.50484e-06	0.415816	0.0169636	1.37264e-05	6.1909e-06	3.2187e-06	0.00647794	0.000475381	0.00422152
H13	0.000358356	0.00127461	0.000128432	2.05576e-05	0.0303894	1.60825e-05	0.484075	4.15204e-06	0.00360998	1.07425e-06	9.19041e-07	0.0169636	0.410991	1.73985e-05	1.16165e-05	4.39846e-06	0.00637359	0.000680913	0.000457791
C14	0.466175	0.0381335	0.0614097	0.517776	0.000481149	0.0376837	0.000220107	0.0189416	9.64731e-05	0.00626913	0.00633679	1.37264e-05	1.73985e-05	4.06198	0.462719	0.463605	0.00150257	0.000288859	0.000413691
H15	0.0233286	0.00841274	0.00410017	0.0190407	0.000223978	0.00976124	0.000136873	0.00116917	1.86966e-05	0.000473217	0.000759396	6.1909e-06	1.16165e-05	0.462719	0.39217	0.0143962	0.00031124	5.53441e-05	0.000112924
H16	0.0209028	0.00788922	0.00823807	0.0172643	9.25124e-05	0.00596309	5.57987e-05	0.004921	1.03419e-05	0.00380497	0.000436047	3.2187e-06	4.39846e-06	0.463605	0.0143962	0.391269	0.000303482	5.98932e-05	5.77936e-05
C17	0.0244851	0.535326	0.0190368	0.00664557	0.515815	0.00561916	0.0379363	0.000799307	0.0194921	0.000150768	0.000223743	0.00647794	0.00637359	0.00150257	0.00031124	0.000303482	4.0325	0.436924	0.46204
H18	0.00744014	0.0250054	0.0325483	0.0022511	0.016961	0.000791518	0.00875244	0.00100215	0.00134425	3.28522e-05	3.45487e-05	0.000475381	0.000680913	0.000288859	5.53441e-05	5.98932e-05	0.436924	0.335555	0.0129451
H19	0.00231334	0.0290111	0.000958391	0.00614569	0.0178722	0.00778659	0.00627301	0.000268246	0.00491903	0.000235189	0.000575307	0.00422152	0.000457791	0.000413691	0.000112924	5.77936e-05	0.46204	0.0129451	0.390237
Total	14.776	16.1119	9.21914	6.0313	6.031	6.07361	6.08132	0.932929	0.950618	0.957904	0.952535	0.964683	0.95538	6.14406	0.937207	0.939276	6.11197	0.883148	0.946844	86.0008
LDM — alliciin_conf_5_LIDI_matrix
	S1	S2	O3	C4	C5	C6	C7	H8	H9	H10	H11	H12	H13	C14	H15	H16	C17	H18	H19
S1	12.943	0.517654	0.693255	0.029949	0.00599734	0.0193696	0.00309963	0.00161436	0.000233217	0.000921299	0.00100913	0.000383576	0.000158562	0.463222	0.0246641	0.0220787	0.0252048	0.00179131	0.00731165		64.1391	21.8592	85.9983
S2	0.517654	14.7402	0.0980667	0.0159209	0.0439292	0.00355284	0.0201933	0.0141383	0.00740138	0.000151891	0.000401666	0.00121841	0.00121227	0.0358596	0.00429251	0.00821857	0.535202	0.0300061	0.0250691
O3	0.693255	0.0980667	8.28703	0.0098497	0.00184875	0.00590125	0.00172809	0.00059561	0.000165227	0.00051169	0.000349071	0.000130764	8.64312e-05	0.0632089	0.00622547	0.00523571	0.0173336	0.000857345	0.0292164
C4	0.029949	0.0159209	0.0098497	3.98101	0.000142421	0.919563	7.55552e-05	0.469146	2.41947e-05	0.0298805	0.0301968	5.66973e-06	5.36251e-06	0.519426	0.0176663	0.0177188	0.000572829	0.000233742	0.000139008
C5	0.00599734	0.0439292	0.00184875	0.000142421	3.97171	3.62982e-05	0.921895	8.49366e-05	0.471623	3.49557e-06	5.66491e-06	0.0303124	0.0306534	0.000657678	0.000687034	0.000125181	0.515149	0.0187429	0.0171804
C6	0.0193696	0.00355284	0.00590125	0.919563	3.62982e-05	4.07959	4.29481e-05	0.0284275	3.09119e-06	0.482872	0.48098	2.59214e-06	2.42979e-06	0.0384531	0.00791188	0.00663885	0.000387418	7.01491e-05	8.06882e-05
C7	0.00309963	0.0201933	0.00172809	7.55552e-05	0.921895	4.29481e-05	4.08457	4.16135e-05	0.0285833	1.98771e-06	5.38687e-06	0.483708	0.481664	0.000166255	0.000100711	9.69177e-05	0.0378953	0.00649951	0.00873841
H8	0.00161436	0.0141383	0.00059561	0.469146	8.49366e-05	0.0284275	4.16135e-05	0.395438	3.00951e-05	0.00358051	0.00655164	2.25521e-06	4.9257e-06	0.0191215	0.0016932	0.00459322	0.000415376	0.000222359	4.74884e-05
H9	0.000233217	0.00740138	0.000165227	2.41947e-05	0.471623	3.09119e-06	0.0285833	3.00951e-05	0.40289	5.54038e-07	1.27815e-06	0.00358691	0.0067305	0.000129004	0.000102748	2.39905e-05	0.0194343	0.00509135	0.0014055
H10	0.000921299	0.000151891	0.00051169	0.0298805	3.49557e-06	0.482872	1.98771e-06	0.00358051	5.54038e-07	0.405656	0.0166812	2.31244e-07	1.72411e-07	0.00634609	0.000805762	0.000465653	2.66363e-05	9.57458e-06	8.96645e-06
H11	0.00100913	0.000401666	0.000349071	0.0301968	5.66491e-06	0.48098	5.38687e-06	0.00655164	1.27815e-06	0.0166812	0.411343	4.44459e-07	3.4185e-07	0.00635234	0.000471392	0.0037278	3.32065e-05	1.60827e-05	4.91556e-06
H12	0.000383576	0.00121841	0.000130764	5.66973e-06	0.0303124	2.59214e-06	0.483708	2.25521e-06	0.00358691	2.31244e-07	4.44459e-07	0.409255	0.01688	2.18268e-05	2.16194e-05	6.0117e-06	0.00637803	0.000481888	0.000688845
H13	0.000158562	0.00121227	8.64312e-05	5.36251e-06	0.0306534	2.42979e-06	0.481664	4.9257e-06	0.0067305	1.72411e-07	3.4185e-07	0.01688	0.415344	1.74484e-05	1.59512e-05	4.18235e-06	0.00642296	0.00434808	0.00048681
C14	0.463222	0.0358596	0.0632089	0.519426	0.000657678	0.0384531	0.000166255	0.0191215	0.000129004	0.00634609	0.00635234	2.18268e-05	1.74484e-05	4.05939	0.460095	0.461904	0.00419154	0.00173775	0.00114388
H15	0.0246641	0.00429251	0.00622547	0.0176663	0.000687034	0.00791188	0.000100711	0.0016932	0.000102748	0.000805762	0.000471392	2.16194e-05	1.59512e-05	0.460095	0.384647	0.0143251	0.00525654	0.00278627	0.00186536
H16	0.0220787	0.00821857	0.00523571	0.0177188	0.000125181	0.00663885	9.69177e-05	0.00459322	2.39905e-05	0.000465653	0.0037278	6.0117e-06	4.18235e-06	0.461904	0.0143251	0.389462	0.000343947	0.000141518	8.31904e-05
C17	0.0252048	0.535202	0.0173336	0.000572829	0.515149	0.000387418	0.0378953	0.000415376	0.0194343	2.66363e-05	3.32065e-05	0.00637803	0.00642296	0.00419154	0.00525654	0.000343947	4.03055	0.466917	0.440399
H18	0.00179131	0.0300061	0.000857345	0.000233742	0.0187429	7.01491e-05	0.00649951	0.000222359	0.00509135	9.57458e-06	1.60827e-05	0.000481888	0.00434808	0.00173775	0.00278627	0.000141518	0.466917	0.40655	0.0135905
H19	0.00731165	0.0250691	0.0292164	0.000139008	0.0171804	8.06882e-05	0.00873841	4.74884e-05	0.0014055	8.96645e-06	4.91556e-06	0.000688845	0.00048681	0.00114388	0.00186536	8.31904e-05	0.440399	0.0135905	0.341436
Total	14.7609	16.1027	9.22159	6.04152	6.03079	6.07388	6.07911	0.945749	0.947459	0.947925	0.958132	0.953085	0.964038	6.14145	0.933635	0.935193	6.11211	0.960093	0.888896	85.9983
LDM — alliciin_conf_6_LIDI_matrix
	S1	S2	O3	C4	C5	C6	C7	H8	H9	H10	H11	H12	H13	C14	H15	H16	C17	H18	H19
S1	12.962	0.515412	0.693746	0.0278901	0.00438941	0.0173973	0.00229878	0.0019994	0.000419088	0.0007885	0.0013701	0.000147126	0.000315596	0.465998	0.0235524	0.0207517	0.0241979	0.00302468	0.00762438		64.1347	21.8658	86.0005
S2	0.515412	14.7683	0.095589	0.0100572	0.043199	0.00631472	0.0207763	0.000340281	0.00527608	0.00158313	0.000244675	0.00117652	0.00137111	0.0378781	0.00827913	0.00814769	0.53694	0.0299841	0.0246969
O3	0.693746	0.095589	8.26878	0.0138989	0.00181055	0.00287044	0.00161271	0.0105527	0.000122197	0.000433922	0.000259198	7.27554e-05	0.000128051	0.0614918	0.00391	0.00817101	0.019709	0.00107531	0.0327655
C4	0.0278901	0.0100572	0.0138989	3.97064	0.00348902	0.910722	0.00037713	0.466566	0.00715178	0.0298782	0.0299305	0.000172921	5.1523e-05	0.518205	0.0191855	0.0171842	0.00304572	0.000251046	0.00263579
C5	0.00438941	0.043199	0.00181055	0.00348902	3.97372	0.00634259	0.922058	0.000127151	0.463898	0.00021678	0.000671777	0.0305528	0.030525	0.000396716	0.000130512	5.69037e-05	0.516686	0.0186906	0.0163519
C6	0.0173973	0.00631472	0.00287044	0.910722	0.00634259	4.06965	0.00057757	0.0277304	0.0152668	0.480011	0.481825	0.000258694	8.05106e-05	0.0377457	0.010028	0.0059002	0.00187905	0.000376227	0.00103866
C7	0.00229878	0.0207763	0.00161271	0.00037713	0.922058	0.00057757	4.08833	1.77863e-05	0.0279964	2.3272e-05	9.07747e-05	0.481708	0.484494	0.000163672	2.52194e-05	9.22915e-06	0.037935	0.00658777	0.00866062
H8	0.0019994	0.000340281	0.0105527	0.466566	0.000127151	0.0277304	1.77863e-05	0.386689	0.000224001	0.00642818	0.00353127	5.05505e-06	1.88165e-06	0.0188587	0.00110132	0.00490769	0.000417555	4.19362e-05	0.000887618
H9	0.000419088	0.00527608	0.000122197	0.00715178	0.463898	0.0152668	0.0279964	0.000224001	0.393445	0.000842553	0.00205846	0.00636155	0.00351811	0.000333771	0.000176027	2.51053e-05	0.0189862	0.00505785	0.00111763
H10	0.0007885	0.00158313	0.000433922	0.0298782	0.00021678	0.480011	2.3272e-05	0.00642818	0.000842553	0.409356	0.0167674	1.10936e-05	4.11722e-06	0.00625424	0.000474833	0.00375196	0.000113606	5.31644e-05	3.7327e-05
H11	0.0013701	0.000244675	0.000259198	0.0299305	0.000671777	0.481825	9.07747e-05	0.00353127	0.00205846	0.0167674	0.407258	3.17845e-05	9.84514e-06	0.00632675	0.000762619	0.000435638	0.000135864	5.02403e-05	3.80894e-05
H12	0.000147126	0.00117652	7.27554e-05	0.000172921	0.0305528	0.000258694	0.481708	5.05505e-06	0.00636155	1.10936e-05	3.17845e-05	0.415413	0.0170226	2.35043e-05	9.56294e-06	2.39134e-06	0.00651305	0.00446741	0.000436368
H13	0.000315596	0.00137111	0.000128051	5.1523e-05	0.030525	8.05106e-05	0.484494	1.88165e-06	0.00351811	4.11722e-06	9.84514e-06	0.0170226	0.413266	1.59717e-05	7.72296e-06	1.41189e-06	0.00639209	0.000490244	0.000675576
C14	0.465998	0.0378781	0.0614918	0.518205	0.000396716	0.0377457	0.000163672	0.0188587	0.000333771	0.00625424	0.00632675	2.35043e-05	1.59717e-05	4.06402	0.4625	0.463627	0.00135272	0.000456897	0.000331533
H15	0.0235524	0.00827913	0.00391	0.0191855	0.000130512	0.010028	2.52194e-05	0.00110132	0.000176027	0.000474833	0.000762619	9.56294e-06	7.72296e-06	0.4625	0.391988	0.0144101	0.000398641	0.000155244	8.28701e-05
H16	0.0207517	0.00814769	0.00817101	0.0171842	5.69037e-05	0.0059002	9.22915e-06	0.00490769	2.51053e-05	0.00375196	0.000435638	2.39134e-06	1.41189e-06	0.463627	0.0144101	0.390491	0.000374222	0.000124271	5.15391e-05
C17	0.0241979	0.53694	0.019709	0.00304572	0.516686	0.00187905	0.037935	0.000417555	0.0189862	0.000113606	0.000135864	0.00651305	0.00639209	0.00135272	0.000398641	0.000374222	4.03258	0.464804	0.436863
H18	0.00302468	0.0299841	0.00107531	0.000251046	0.0186906	0.000376227	0.00658777	4.19362e-05	0.00505785	5.31644e-05	5.02403e-05	0.00446741	0.000490244	0.000456897	0.000155244	0.000124271	0.464804	0.394764	0.0131222
H19	0.00762438	0.0246969	0.0327655	0.00263579	0.0163519	0.00103866	0.00866062	0.000887618	0.00111763	3.7327e-05	3.80894e-05	0.000436368	0.000675576	0.000331533	8.28701e-05	5.15391e-05	0.436863	0.0131222	0.333955
Total	14.7734	16.1156	9.217	6.03133	6.03331	6.07602	6.08375	0.930428	0.952277	0.957029	0.951798	0.964386	0.958372	6.14598	0.937178	0.938424	6.10932	0.943577	0.881373	86.0005
LDM — alliciin_conf_7_LIDI_matrix
	S1	S2	O3	C4	C5	C6	C7	H8	H9	H10	H11	H12	H13	C14	H15	H16	C17	H18	H19
S1	12.9464	0.517916	0.692248	0.0316547	0.00573798	0.0179466	0.00298323	0.00182135	0.000228268	0.000782561	0.000988246	0.000374074	0.000155733	0.464606	0.0249238	0.0202773	0.0250484	0.00190586	0.00745227		64.1564	21.8448	86
S2	0.517916	14.759	0.0976159	0.00862466	0.0439676	0.0038182	0.0202696	0.000462433	0.00742293	0.000226663	0.000456013	0.0012297	0.00120581	0.0395592	0.00591026	0.00882931	0.535747	0.0298968	0.025178
O3	0.692248	0.0976159	8.28194	0.0113359	0.00179596	0.00363786	0.00168832	0.00677003	0.000169071	0.000414966	0.000226756	0.000129975	8.46356e-05	0.0620557	0.00556972	0.00818684	0.0174783	0.0008685	0.0296178
C4	0.0316547	0.00862466	0.0113359	3.98414	0.000150429	0.921456	0.000106082	0.469584	2.68277e-05	0.030479	0.029992	7.97522e-06	5.31006e-06	0.516985	0.0182951	0.0173636	0.000441217	0.000183938	9.85211e-05
C5	0.00573798	0.0439676	0.00179596	0.000150429	3.97173	0.000165026	0.922005	8.46169e-06	0.471662	8.07326e-06	1.04675e-05	0.0303234	0.0306543	0.000652243	0.000699802	9.51906e-05	0.515298	0.0187101	0.0171645
C6	0.0179466	0.0038182	0.00363786	0.921456	0.000165026	4.07979	3.93236e-05	0.0282426	1.34915e-05	0.481317	0.482873	7.40698e-06	3.12898e-06	0.0384524	0.00911205	0.00630408	0.000315483	0.000146468	8.46809e-05
C7	0.00298323	0.0202696	0.00168832	0.000106082	0.922005	3.93236e-05	4.0845	4.56091e-06	0.0285899	3.04249e-06	5.2321e-06	0.483707	0.481603	0.000166029	9.68053e-05	4.15769e-05	0.0379137	0.00647552	0.00873904
H8	0.00182135	0.000462433	0.00677003	0.469584	8.46169e-06	0.0282426	4.56091e-06	0.392308	8.90685e-07	0.00657877	0.00355982	3.94929e-07	2.80113e-07	0.0190291	0.00136306	0.00490198	2.35755e-05	5.98641e-06	1.08139e-05
H9	0.000228268	0.00742293	0.000169071	2.68277e-05	0.471662	1.34915e-05	0.0285899	8.90685e-07	0.403148	9.34217e-07	2.04811e-06	0.00358905	0.0067307	0.000126521	0.000114488	1.23208e-05	0.019506	0.00508618	0.00140042
H10	0.000782561	0.000226663	0.000414966	0.030479	8.07326e-06	0.481317	3.04249e-06	0.00657877	9.34217e-07	0.413067	0.0167461	3.80484e-07	1.89762e-07	0.00638197	0.00046588	0.00394215	1.65399e-05	6.17355e-06	4.9132e-06
H11	0.000988246	0.000456013	0.000226756	0.029992	1.04675e-05	0.482873	5.2321e-06	0.00355982	2.04811e-06	0.0167461	0.405933	4.41923e-07	3.0897e-07	0.00636011	0.000759651	0.000450617	2.89904e-05	1.40469e-05	7.45783e-06
H12	0.000374074	0.0012297	0.000129975	7.97522e-06	0.0303234	7.40698e-06	0.483707	3.94929e-07	0.00358905	3.80484e-07	4.41923e-07	0.409309	0.0168732	2.16751e-05	2.15565e-05	3.57845e-06	0.00637926	0.000479561	0.000687086
H13	0.000155733	0.00120581	8.46356e-05	5.31006e-06	0.0306543	3.12898e-06	0.481603	2.80113e-07	0.0067307	1.89762e-07	3.0897e-07	0.0168732	0.415076	1.75607e-05	1.65259e-05	2.94736e-06	0.00642099	0.0043345	0.000483654
C14	0.464606	0.0395592	0.0620557	0.516985	0.000652243	0.0384524	0.000166029	0.0190291	0.000126521	0.00638197	0.00636011	2.16751e-05	1.75607e-05	4.05732	0.458931	0.463721	0.00414647	0.00171091	0.00108734
H15	0.0249238	0.00591026	0.00556972	0.0182951	0.000699802	0.00911205	9.68053e-05	0.00136306	0.000114488	0.00046588	0.000759651	2.15565e-05	1.65259e-05	0.458931	0.384231	0.0141322	0.00550941	0.00296294	0.00173997
H16	0.0202773	0.00882931	0.00818684	0.0173636	9.51906e-05	0.00630408	4.15769e-05	0.00490198	1.23208e-05	0.00394215	0.000450617	3.57845e-06	2.94736e-06	0.463721	0.0141322	0.39135	0.000363622	9.74239e-05	0.000116287
C17	0.0250484	0.535747	0.0174783	0.000441217	0.515298	0.000315483	0.0379137	2.35755e-05	0.019506	1.65399e-05	2.89904e-05	0.00637926	0.00642099	0.00414647	0.00550941	0.000363622	4.03119	0.466725	0.44024
H18	0.00190586	0.0298968	0.0008685	0.000183938	0.0187101	0.000146468	0.00647552	5.98641e-06	0.00508618	6.17355e-06	1.40469e-05	0.000479561	0.0043345	0.00171091	0.00296294	9.74239e-05	0.466725	0.404974	0.0135365
H19	0.00745227	0.025178	0.0296178	9.85211e-05	0.0171645	8.46809e-05	0.00873904	1.08139e-05	0.00140042	4.9132e-06	7.45783e-06	0.000687086	0.000483654	0.00108734	0.00173997	0.000116287	0.44024	0.0135365	0.341078
Total	14.7634	16.1073	9.22184	6.04093	6.03084	6.07373	6.07894	0.934677	0.94783	0.960443	0.948414	0.953144	0.963669	6.14133	0.934855	0.940193	6.11279	0.95812	0.888727	86.0012
LDM — alliciin_conf_8_LIDI_matrix
	S1	S2	O3	C4	C5	C6	C7	H8	H9	H10	H11	H12	H13	C14	H15	H16	C17	H18	H19
S1	12.91	0.524468	0.697805	0.0275093	0.0142838	0.0158483	0.0111417	0.002681	0.000498464	0.00138816	0.000728723	0.000321027	0.00106785	0.466592	0.024122	0.0201759	0.0241275	0.00327778	0.0060046		64.1202	21.881	86
S2	0.524468	14.7317	0.103111	0.0220698	0.0410073	0.0118955	0.0217975	0.00185152	0.00688969	0.000382963	0.000835504	0.00153685	0.00130217	0.0343078	0.00651765	0.00752545	0.534264	0.0286616	0.0272122
O3	0.697805	0.103111	8.30633	0.0114455	0.00138741	0.00294375	0.00159646	0.0108441	0.000249116	0.000333401	0.000506093	0.000110786	0.00146702	0.061019	0.0044367	0.00821754	0.00723528	0.00756682	0.00122235
C4	0.0275093	0.0220698	0.0114455	3.97403	0.000365399	0.918667	0.000354002	0.465519	1.6035e-05	0.0301047	0.0306953	2.05657e-05	2.20073e-05	0.516247	0.0188094	0.0172649	0.00132376	7.01625e-05	6.78277e-05
C5	0.0142838	0.0410073	0.00138741	0.000365399	3.97279	0.000325828	0.917767	2.50746e-05	0.473488	1.89859e-05	1.32501e-05	0.0302818	0.0299548	0.0010877	6.3446e-05	5.11532e-05	0.515696	0.0178618	0.0189908
C6	0.0158483	0.0118955	0.00294375	0.918667	0.000325828	4.07363	0.000345607	0.0272992	1.21737e-05	0.482911	0.481679	2.06354e-05	1.38165e-05	0.0379362	0.0106867	0.0059541	0.00066318	2.95555e-05	4.96216e-05
C7	0.0111417	0.0217975	0.00159646	0.000354002	0.917767	0.000345607	4.0812	1.61094e-05	0.0290142	1.88169e-05	1.36191e-05	0.483818	0.479227	0.000521865	5.96678e-05	2.27702e-05	0.0367515	0.00612565	0.00937105
H8	0.002681	0.00185152	0.0108441	0.465519	2.50746e-05	0.0272992	1.61094e-05	0.382576	2.11447e-06	0.00351769	0.00641792	9.21419e-07	2.36106e-06	0.0189122	0.000831429	0.00488674	4.52442e-05	1.3378e-05	3.95517e-06
H9	0.000498464	0.00688969	0.000249116	1.6035e-05	0.473488	1.21737e-05	0.0290142	2.11447e-06	0.412031	5.74664e-07	9.86185e-07	0.00364436	0.00671481	3.55163e-05	2.81994e-06	1.07826e-05	0.019905	0.00503739	0.00135491
H10	0.00138816	0.000382963	0.000333401	0.0301047	1.89859e-05	0.482911	1.88169e-05	0.00351769	5.74664e-07	0.407841	0.0168905	8.63512e-07	8.96472e-07	0.00637295	0.000714978	0.000441056	1.71534e-05	8.17673e-07	2.0412e-06
H11	0.000728723	0.000835504	0.000506093	0.0306953	1.32501e-05	0.481679	1.36191e-05	0.00641792	9.86185e-07	0.0168905	0.415809	8.46943e-07	7.23232e-07	0.00631544	0.000464864	0.0037295	6.13982e-05	1.0389e-05	3.66525e-06
H12	0.000321027	0.00153685	0.000110786	2.05657e-05	0.0302818	2.06354e-05	0.483818	9.21419e-07	0.00364436	8.63512e-07	8.46943e-07	0.410938	0.0166055	1.50227e-05	2.19155e-06	1.24302e-06	0.00632145	0.000438532	0.000791126
H13	0.00106785	0.00130217	0.00146702	2.20073e-05	0.0299548	1.38165e-05	0.479227	2.36106e-06	0.00671481	8.96472e-07	7.23232e-07	0.0166055	0.404771	4.56129e-05	4.14884e-06	6.18581e-06	0.00624443	0.00398165	0.000485511
C14	0.466592	0.0343078	0.061019	0.516247	0.0010877	0.0379362	0.000521865	0.0189122	3.55163e-05	0.00637295	0.00631544	1.50227e-05	4.56129e-05	4.06866	0.461879	0.464551	0.00541186	0.000342872	0.0010066
H15	0.024122	0.00651765	0.0044367	0.0188094	6.3446e-05	0.0106867	5.96678e-05	0.000831429	2.81994e-06	0.000714978	0.000464864	2.19155e-06	4.14884e-06	0.461879	0.388931	0.0144182	0.00122511	3.55036e-05	0.000378777
H16	0.0201759	0.00752545	0.00821754	0.0172649	5.11532e-05	0.0059541	2.27702e-05	0.00488674	1.07826e-05	0.000441056	0.0037295	1.24302e-06	6.18581e-06	0.464551	0.0144182	0.391112	0.000469041	0.000133223	3.46634e-05
C17	0.0241275	0.534264	0.00723528	0.00132376	0.515696	0.00066318	0.0367515	4.52442e-05	0.019905	1.71534e-05	6.13982e-05	0.00632145	0.00624443	0.00541186	0.00122511	0.000469041	4.01546	0.459232	0.464228
H18	0.00327778	0.0286616	0.00756682	7.01625e-05	0.0178618	2.95555e-05	0.00612565	1.3378e-05	0.00503739	8.17673e-07	1.0389e-05	0.000438532	0.00398165	0.000342872	3.55036e-05	0.000133223	0.459232	0.379241	0.0143175
H19	0.0060046	0.0272122	0.00122235	6.78277e-05	0.0189908	4.96216e-05	0.00937105	3.95517e-06	0.00135491	2.0412e-06	3.66525e-06	0.000791126	0.000485511	0.0010066	0.000378777	3.46634e-05	0.464228	0.0143175	0.393177
Total	14.7521	16.1073	9.22783	6.0346	6.03546	6.07092	6.07916	0.925446	0.958908	0.950959	0.964177	0.95487	0.951918	6.15126	0.933583	0.939005	6.09868	0.926378	0.938702	86.0012
LDM — alliciin_conf_9_LIDI_matrix
	S1	S2	O3	C4	C5	C6	C7	H8	H9	H10	H11	H12	H13	C14	H15	H16	C17	H18	H19
S1	12.9571	0.520151	0.692838	0.0292137	0.00594415	0.0172584	0.0030621	0.00304751	0.000234935	0.000867433	0.000925606	0.000384729	0.000159384	0.461381	0.0221024	0.0238423	0.025546	0.00189597	0.00746272		64.1344	21.8659	86
S2	0.520151	14.7266	0.0976507	0.0135403	0.0439734	0.0149774	0.0201952	0.000492649	0.00742916	0.00484967	0.000367171	0.00122298	0.00121317	0.0365473	0.00768589	0.00614229	0.535546	0.0298605	0.024877
O3	0.692838	0.0976507	8.28545	0.00919621	0.0018652	0.00567218	0.00175041	0.00054832	0.000173591	0.000335891	0.000550815	0.00013317	8.84985e-05	0.0630813	0.00704903	0.00458135	0.0181437	0.000887095	0.0305407
C4	0.0292137	0.0135403	0.00919621	3.97947	0.000147791	0.916992	7.30336e-05	0.474645	2.04404e-05	0.0295676	0.0299216	5.97421e-06	5.44092e-06	0.521034	0.0184485	0.0173663	0.00056236	0.000203937	0.000141308
C5	0.00594415	0.0439734	0.0018652	0.000147791	3.97126	8.71853e-05	0.921826	2.48841e-05	0.471617	5.61219e-05	2.95022e-06	0.0303237	0.0306668	0.000652717	0.000121833	0.000703425	0.515275	0.0187792	0.0171149
C6	0.0172584	0.0149774	0.00567218	0.916992	8.71853e-05	4.06643	4.49398e-05	0.029663	1.82828e-05	0.478733	0.482618	2.59419e-06	4.3526e-06	0.0375945	0.00825645	0.00600051	0.000518282	0.000392445	6.39991e-05
C7	0.0030621	0.0201952	0.00175041	7.30336e-05	0.921826	4.49398e-05	4.08491	7.60168e-06	0.0285782	1.09052e-05	9.60195e-07	0.483766	0.481747	0.000164418	8.26571e-05	0.000104923	0.0379133	0.00651779	0.00873896
H8	0.00304751	0.000492649	0.00054832	0.474645	2.48841e-05	0.029663	7.60168e-06	0.411333	2.49846e-06	0.00672027	0.00368735	1.21323e-06	7.20366e-07	0.0200373	0.00181899	0.00474199	0.000122267	0.000101548	4.26575e-05
H9	0.000234935	0.00742916	0.000173591	2.04404e-05	0.471617	1.82828e-05	0.0285782	2.49846e-06	0.402948	3.21889e-05	7.63568e-07	0.00358733	0.00673748	0.000134041	2.47708e-05	0.000113332	0.0194525	0.00509127	0.00139248
H10	0.000867433	0.00484967	0.000335891	0.0295676	5.61219e-05	0.478733	1.09052e-05	0.00672027	3.21889e-05	0.407383	0.0164937	9.3511e-07	6.4927e-06	0.00605048	0.00047837	0.00330979	0.000440674	0.000549612	2.60592e-05
H11	0.000925606	0.000367171	0.000550815	0.0299216	2.95022e-06	0.482618	9.60195e-07	0.00368735	7.63568e-07	0.0164937	0.406084	1.6155e-07	3.05893e-07	0.00628372	0.000770886	0.000410061	2.29749e-05	4.44508e-05	2.2561e-06
H12	0.000384729	0.00122298	0.00013317	5.97421e-06	0.0303237	2.59419e-06	0.483766	1.21323e-06	0.00358733	9.3511e-07	1.6155e-07	0.409551	0.0169057	2.10342e-05	5.38048e-06	2.17357e-05	0.00638242	0.000483697	0.000685264
H13	0.000159384	0.00121317	8.84985e-05	5.44092e-06	0.0306668	4.3526e-06	0.481747	7.20366e-07	0.00673748	6.4927e-06	3.05893e-07	0.0169057	0.415895	1.75149e-05	3.64411e-06	1.6757e-05	0.006428	0.00437363	0.00048544
C14	0.461381	0.0365473	0.0630813	0.521034	0.000652717	0.0375945	0.000164418	0.0200373	0.000134041	0.00605048	0.00628372	2.10342e-05	1.75149e-05	4.05869	0.462056	0.459941	0.0039581	0.001755	0.000959083
H15	0.0221024	0.00768589	0.00704903	0.0184485	0.000121833	0.00825645	8.26571e-05	0.00181899	2.47708e-05	0.00047837	0.000770886	5.38048e-06	3.64411e-06	0.462056	0.386326	0.0142608	0.00029184	0.000127207	5.73776e-05
H16	0.0238423	0.00614229	0.00458135	0.0173663	0.000703425	0.00600051	0.000104923	0.00474199	0.000113332	0.00330979	0.000410061	2.17357e-05	1.6757e-05	0.459941	0.0142608	0.386173	0.00530201	0.00305636	0.00147996
C17	0.025546	0.535546	0.0181437	0.00056236	0.515275	0.000518282	0.0379133	0.000122267	0.0194525	0.000440674	2.29749e-05	0.00638242	0.006428	0.0039581	0.00029184	0.00530201	4.03209	0.466767	0.439406
H18	0.00189597	0.0298605	0.000887095	0.000203937	0.0187792	0.000392445	0.00651779	0.000101548	0.00509127	0.000549612	4.44508e-05	0.000483697	0.00437363	0.001755	0.000127207	0.00305636	0.466767	0.407797	0.0135491
H19	0.00746272	0.024877	0.0305407	0.000141308	0.0171149	6.39991e-05	0.00873896	4.26575e-05	0.00139248	2.60592e-05	2.2561e-06	0.000685264	0.00048544	0.000959083	5.73776e-05	0.00147996	0.439406	0.0135491	0.338908
Total	14.7735	16.0933	9.22053	6.04055	6.03044	6.06533	6.0795	0.957039	0.947588	0.955912	0.948187	0.953485	0.964755	6.14035	0.929969	0.937568	6.11417	0.962232	0.885933	86.0003
LDM — alliciin_conf_10_LIDI_matrix
	S1	S2	O3	C4	C5	C6	C7	H8	H9	H10	H11	H12	H13	C14	H15	H16	C17	H18	H19
S1	12.9066	0.511394	0.696673	0.0299786	0.0130796	0.0198626	0.0104471	0.00150799	0.000438122	0.00114628	0.000927786	0.00092591	0.000294777	0.464175	0.0244695	0.0230505	0.0228918	0.00641173	0.00334155		64.1415	21.8575	86
S2	0.511394	14.7671	0.101632	0.0173041	0.0422336	0.00482255	0.0226409	0.0119707	0.00655349	0.000461897	0.00021697	0.00127348	0.00155294	0.0338697	0.0101405	0.0064554	0.534357	0.027512	0.0282036
O3	0.696673	0.101632	8.30004	0.00974052	0.00250537	0.0058788	0.00452483	0.000640642	0.000341957	0.000355258	0.000488603	0.00452952	0.000278412	0.0615072	0.00626872	0.00463668	0.0119069	0.00147023	0.0133332
C4	0.0299786	0.0173041	0.00974052	3.98	0.000125503	0.917882	0.000119597	0.469765	1.34149e-05	0.0301777	0.0298584	2.14814e-05	7.93538e-06	0.519769	0.0173772	0.0178638	0.00131183	9.09617e-05	0.000177716
C5	0.0130796	0.0422336	0.00250537	0.000125503	3.97565	9.81295e-05	0.91727	9.14357e-05	0.473784	9.11075e-06	4.97253e-06	0.0294222	0.0303462	0.00117506	0.000237903	8.20756e-05	0.515113	0.0187731	0.0174231
C6	0.0198626	0.00482255	0.0058788	0.917882	9.81295e-05	4.07851	7.51312e-05	0.0285652	1.12917e-05	0.480999	0.482949	1.70809e-05	3.31699e-06	0.0382136	0.00754871	0.00697878	0.000256023	2.13201e-05	0.000137588
C7	0.0104471	0.0226409	0.00452483	0.000119597	0.91727	7.51312e-05	4.08172	0.00011663	0.0289901	8.88653e-06	3.74565e-06	0.47704	0.483936	0.000610379	0.00022369	6.97801e-05	0.0366216	0.00897874	0.00591622
H8	0.00150799	0.0119707	0.000640642	0.469765	9.14357e-05	0.0285652	0.00011663	0.399127	7.2282e-06	0.00657219	0.00358977	5.68775e-06	8.99594e-06	0.0193039	0.00181756	0.00444871	0.00100233	2.78629e-05	0.000123152
H9	0.000438122	0.00655349	0.000341957	1.34149e-05	0.473784	1.12917e-05	0.0289901	7.2282e-06	0.412141	6.97309e-07	4.94465e-07	0.00661771	0.00363442	4.06935e-05	1.09637e-05	5.06056e-06	0.0199388	0.00142649	0.0048847
H10	0.00114628	0.000461897	0.000355258	0.0301777	9.11075e-06	0.480999	8.88653e-06	0.00657219	6.97309e-07	0.411371	0.0166702	9.9076e-07	5.57019e-07	0.0063163	0.000470211	0.00360936	5.26684e-05	4.81249e-06	7.26635e-06
H11	0.000927786	0.00021697	0.000488603	0.0298584	4.97253e-06	0.482949	3.74565e-06	0.00358977	4.94465e-07	0.0166702	0.405682	1.39286e-06	1.83799e-07	0.00635979	0.000819545	0.000475686	1.37923e-05	1.04296e-06	5.98085e-06
H12	0.00092591	0.00127348	0.00452952	2.14814e-05	0.0294222	1.70809e-05	0.47704	5.68775e-06	0.00661771	9.9076e-07	1.39286e-06	0.397066	0.0163752	0.000107126	1.41695e-05	7.22988e-06	0.00602131	0.000465787	0.00364701
H13	0.000294777	0.00155294	0.000278412	7.93538e-06	0.0303462	3.31699e-06	0.483936	8.99594e-06	0.00363442	5.57019e-07	1.83799e-07	0.0163752	0.411684	1.97427e-05	1.09079e-05	2.72695e-06	0.00632255	0.000798536	0.00041039
C14	0.464175	0.0338697	0.0615072	0.519769	0.00117506	0.0382136	0.000610379	0.0193039	4.06935e-05	0.0063163	0.00635979	0.000107126	1.97427e-05	4.06962	0.461035	0.462693	0.00447791	0.000796001	0.00031582
H15	0.0244695	0.0101405	0.00626872	0.0173772	0.000237903	0.00754871	0.00022369	0.00181756	1.09637e-05	0.000470211	0.000819545	1.41695e-05	1.09079e-05	0.461035	0.376015	0.0141453	0.00034961	3.77788e-05	3.58378e-05
H16	0.0230505	0.0064554	0.00463668	0.0178638	8.20756e-05	0.00697878	6.97801e-05	0.00444871	5.06056e-06	0.00360936	0.000475686	7.22988e-06	2.72695e-06	0.462693	0.0141453	0.390742	0.00109841	0.000342046	6.09614e-05
C17	0.0228918	0.534357	0.0119069	0.00131183	0.515113	0.000256023	0.0366216	0.00100233	0.0199388	5.26684e-05	1.37923e-05	0.00602131	0.00632255	0.00447791	0.00034961	0.00109841	4.01623	0.464526	0.455103
H18	0.00641173	0.027512	0.00147023	9.09617e-05	0.0187731	2.13201e-05	0.00897874	2.78629e-05	0.00142649	4.81249e-06	1.04296e-06	0.000465787	0.000798536	0.000796001	3.77788e-05	0.000342046	0.464526	0.393566	0.0139265
H19	0.00334155	0.0282036	0.0133332	0.000177716	0.0174231	0.000137588	0.00591622	0.000123152	0.0048847	7.26635e-06	5.98085e-06	0.00364701	0.00041039	0.00031582	3.58378e-05	6.09614e-05	0.455103	0.0139265	0.368629
Total	14.7376	16.1297	9.22675	6.04158	6.03742	6.07283	6.07931	0.948692	0.95884	0.958234	0.948069	0.943559	0.955688	6.1504	0.921028	0.936767	6.0976	0.939177	0.915683	85.9989
LDM — alliciin_conf_11_LIDI_matrix
	S1	S2	O3	C4	C5	C6	C7	H8	H9	H10	H11	H12	H13	C14	H15	H16	C17	H18	H19
S1	12.9081	0.513045	0.696224	0.0330295	0.0131918	0.0179608	0.0105881	0.0019712	0.000440571	0.000766939	0.00099737	0.00095886	0.000298282	0.465218	0.0247979	0.0199228	0.0227767	0.00335917	0.00629732		64.1588	21.8403	86
S2	0.513045	14.7809	0.101668	0.00686604	0.0422379	0.00297414	0.0227477	0.000442468	0.00649893	0.000172461	0.000334395	0.00128167	0.00155617	0.0381932	0.0113877	0.00862184	0.535432	0.0285926	0.0273883
O3	0.696224	0.101668	8.29953	0.00950226	0.00227361	0.00309513	0.00406316	0.00568639	0.000325	0.000383169	0.000202999	0.00415529	0.000257648	0.0611077	0.00613058	0.00813807	0.0110164	0.0123855	0.00140647
C4	0.0330295	0.00686604	0.00950226	3.98285	0.000111804	0.922228	9.83006e-05	0.470193	5.9211e-06	0.0304829	0.0300622	1.12231e-05	4.12587e-06	0.516838	0.0180189	0.0175667	0.00129714	6.01641e-05	0.000330373
C5	0.0131918	0.0422379	0.00227361	0.000111804	3.97581	0.000105348	0.917348	4.29293e-06	0.473849	4.70884e-06	8.31163e-06	0.0294834	0.0303273	0.00118545	0.000256332	6.96558e-05	0.515243	0.0174972	0.0187758
C6	0.0179608	0.00297414	0.00309513	0.922228	0.000105348	4.07919	3.60842e-05	0.028454	4.65612e-06	0.481301	0.482947	4.40353e-06	1.26841e-06	0.0383055	0.00913461	0.00635075	0.00049788	3.51873e-05	0.00021977
C7	0.0105881	0.0227477	0.00406316	9.83006e-05	0.917348	3.60842e-05	4.08146	6.73324e-06	0.0290152	3.33654e-06	5.11606e-06	0.477195	0.483875	0.000669853	0.000257551	8.26952e-05	0.0366551	0.00594565	0.00896877
H8	0.0019712	0.000442468	0.00568639	0.470193	4.29293e-06	0.028454	6.73324e-06	0.393972	6.30677e-07	0.00660387	0.00357177	2.33223e-06	3.93953e-07	0.0191123	0.00133746	0.00492255	5.37059e-05	1.22586e-05	7.07849e-06
H9	0.000440571	0.00649893	0.000325	5.9211e-06	0.473849	4.65612e-06	0.0290152	6.30677e-07	0.412305	2.21174e-07	4.44977e-07	0.00662872	0.0036345	4.36178e-05	1.14199e-05	7.81976e-06	0.0199052	0.00490008	0.00142916
H10	0.000766939	0.000172461	0.000383169	0.0304829	4.70884e-06	0.481301	3.33654e-06	0.00660387	2.21174e-07	0.413336	0.0167664	5.90693e-07	1.41089e-07	0.00637055	0.000463599	0.00397518	3.02292e-05	2.17016e-06	9.84178e-06
H11	0.00099737	0.000334395	0.000202999	0.0300622	8.31163e-06	0.482947	5.11606e-06	0.00357177	4.44977e-07	0.0167664	0.406471	5.67393e-07	2.31005e-07	0.00639385	0.000756814	0.00046175	7.10133e-05	4.15194e-06	1.99966e-05
H12	0.00095886	0.00128167	0.00415529	1.12231e-05	0.0294834	4.40353e-06	0.477195	2.33223e-06	0.00662872	5.90693e-07	5.67393e-07	0.397627	0.0163814	0.000104397	1.57585e-05	1.79196e-05	0.00605096	0.00369355	0.000466714
H13	0.000298282	0.00155617	0.000257648	4.12587e-06	0.0303273	1.26841e-06	0.483875	3.93953e-07	0.0036345	1.41089e-07	2.31005e-07	0.0163814	0.411352	2.31779e-05	1.27728e-05	5.37065e-06	0.00632355	0.000413898	0.00079977
C14	0.465218	0.0381932	0.0611077	0.516838	0.00118545	0.0383055	0.000669853	0.0191123	4.36178e-05	0.00637055	0.00639385	0.000104397	2.31779e-05	4.06914	0.459182	0.463819	0.00468164	0.000366223	0.000732422
H15	0.0247979	0.0113877	0.00613058	0.0180189	0.000256332	0.00913461	0.000257551	0.00133746	1.14199e-05	0.000463599	0.000756814	1.57585e-05	1.27728e-05	0.459182	0.374466	0.0139907	0.00045573	3.47109e-05	3.19782e-05
H16	0.0199228	0.00862184	0.00813807	0.0175667	6.96558e-05	0.00635075	8.26952e-05	0.00492255	7.81976e-06	0.00397518	0.00046175	1.79196e-05	5.37065e-06	0.463819	0.0139907	0.392461	0.000785651	0.000130471	4.2302e-05
C17	0.0227767	0.535432	0.0110164	0.00129714	0.515243	0.00049788	0.0366551	5.37059e-05	0.0199052	3.02292e-05	7.10133e-05	0.00605096	0.00632355	0.00468164	0.00045573	0.000785651	4.01655	0.455687	0.464586
H18	0.00335917	0.0285926	0.0123855	6.01641e-05	0.0174972	3.51873e-05	0.00594565	1.22586e-05	0.00490008	2.17016e-06	4.15194e-06	0.00369355	0.000413898	0.000366223	3.47109e-05	0.000130471	0.455687	0.370002	0.0139851
H19	0.00629732	0.0273883	0.00140647	0.000330373	0.0187758	0.00021977	0.00896877	7.07849e-06	0.00142916	9.84178e-06	1.99966e-05	0.000466714	0.00079977	0.000732422	3.19782e-05	4.2302e-05	0.464586	0.0139851	0.393306
Total	14.7399	16.1303	9.22755	6.03956	6.03778	6.07285	6.07902	0.936355	0.959006	0.960673	0.949076	0.94408	0.955267	6.15149	0.920742	0.941372	6.0981	0.917107	0.938803	85.9991
LDM — alliciin_conf_12_LIDI_matrix
	S1	S2	O3	C4	C5	C6	C7	H8	H9	H10	H11	H12	H13	C14	H15	H16	C17	H18	H19
S1	12.9536	0.515984	0.694325	0.0310269	0.00577352	0.0191579	0.00298774	0.0022445	0.000227299	0.000914853	0.000973059	0.00037533	0.00015519	0.461067	0.0245374	0.0204949	0.025015	0.00185427	0.00744583		64.1496	21.8514	86
S2	0.515984	14.7593	0.0974422	0.00840894	0.0440582	0.00450677	0.0202758	0.000394944	0.0074669	0.000312444	0.000433669	0.00123049	0.00120968	0.0393856	0.0049821	0.0105471	0.536189	0.0300033	0.0252033
O3	0.694325	0.0974422	8.27273	0.0122503	0.00179333	0.0113232	0.00170046	0.000454607	0.000162535	0.00269202	0.000425728	0.000129899	8.51406e-05	0.0622879	0.00612755	0.00806201	0.0176068	0.000868155	0.0299219
C4	0.0310269	0.00840894	0.0122503	3.98162	0.000147217	0.916344	0.000103036	0.475403	2.76369e-05	0.0293762	0.0299875	7.6746e-06	5.09257e-06	0.518613	0.0178102	0.0178391	0.000441622	0.000183771	0.000114235
C5	0.00577352	0.0440582	0.00179333	0.000147217	3.97161	0.000126069	0.921965	2.31636e-05	0.47165	8.08212e-06	9.87737e-06	0.0303262	0.0306434	0.000653801	0.00066638	0.000100349	0.515402	0.018711	0.0171478
C6	0.0191579	0.00450677	0.0113232	0.916344	0.000126069	4.06589	3.81631e-05	0.0297653	1.14847e-05	0.478367	0.482893	5.26964e-06	2.28995e-06	0.0374916	0.00673241	0.00712899	0.000186829	5.78116e-05	7.06157e-05
C7	0.00298774	0.0202758	0.00170046	0.000103036	0.921965	3.81631e-05	4.08492	7.45312e-06	0.0286038	3.50699e-06	5.68795e-06	0.483764	0.48168	0.000166241	9.33313e-05	4.66888e-05	0.037965	0.00649091	0.00874272
H8	0.0022445	0.000394944	0.000454607	0.475403	2.31636e-05	0.0297653	7.45312e-06	0.413128	2.74526e-06	0.00669907	0.00367588	1.28967e-06	6.45181e-07	0.0201188	0.00438632	0.00211974	0.000123711	6.36102e-05	4.48097e-05
H9	0.000227299	0.0074669	0.000162535	2.76369e-05	0.47165	1.14847e-05	0.0286038	2.74526e-06	0.403233	8.07471e-07	1.5704e-06	0.00359083	0.00673332	0.000126227	0.000106932	1.51949e-05	0.0194976	0.00509069	0.00139956
H10	0.000914853	0.000312444	0.00269202	0.0293762	8.08212e-06	0.478367	3.50699e-06	0.00669907	8.07471e-07	0.40258	0.0164102	4.16495e-07	1.80158e-07	0.00606042	0.00335564	0.000439534	2.77139e-05	1.18437e-05	4.0985e-05
H11	0.000973059	0.000433669	0.000425728	0.0299875	9.87737e-06	0.482893	5.68795e-06	0.00367588	1.5704e-06	0.0164102	0.407252	4.36995e-07	2.98591e-07	0.00630985	0.000443379	0.000804044	1.23634e-05	4.34825e-06	4.5293e-06
H12	0.00037533	0.00123049	0.000129899	7.6746e-06	0.0303262	5.26964e-06	0.483764	1.28967e-06	0.00359083	4.16495e-07	4.36995e-07	0.409502	0.0168846	2.16748e-05	2.03911e-05	3.77736e-06	0.0063812	0.000479384	0.000686601
H13	0.00015519	0.00120968	8.51406e-05	5.09257e-06	0.0306434	2.28995e-06	0.48168	6.45181e-07	0.00673332	1.80158e-07	2.98591e-07	0.0168846	0.415194	1.72537e-05	1.5643e-05	3.36318e-06	0.00642569	0.00433494	0.000484273
C14	0.461067	0.0393856	0.0622879	0.518613	0.000653801	0.0374916	0.000166241	0.0201188	0.000126227	0.00606042	0.00630985	2.16748e-05	1.72537e-05	4.05729	0.458403	0.465347	0.00411534	0.00168982	0.00108174
H15	0.0245374	0.0049821	0.00612755	0.0178102	0.00066638	0.00673241	9.33313e-05	0.00438632	0.000106932	0.00335564	0.000443379	2.03911e-05	1.5643e-05	0.458403	0.383873	0.0142514	0.00524426	0.0027912	0.0017672
H16	0.0204949	0.0105471	0.00806201	0.0178391	0.000100349	0.00712899	4.66888e-05	0.00211974	1.51949e-05	0.000439534	0.000804044	3.77736e-06	3.36318e-06	0.465347	0.0142514	0.3908	0.000387705	0.000104405	0.00011205
C17	0.025015	0.536189	0.0176068	0.000441622	0.515402	0.000186829	0.037965	0.000123711	0.0194976	2.77139e-05	1.23634e-05	0.0063812	0.00642569	0.00411534	0.00524426	0.000387705	4.03112	0.466777	0.439939
H18	0.00185427	0.0300033	0.000868155	0.000183771	0.018711	5.78116e-05	0.00649091	6.36102e-05	0.00509069	1.18437e-05	4.34825e-06	0.000479384	0.00433494	0.00168982	0.0027912	0.000104405	0.466777	0.405234	0.0135341
H19	0.00744583	0.0252033	0.0299219	0.000114235	0.0171478	7.06157e-05	0.00874272	4.48097e-05	0.00139956	4.0985e-05	4.5293e-06	0.000686601	0.000484273	0.00108174	0.0017672	0.00011205	0.439939	0.0135341	0.340716
Total	14.7682	16.1074	9.22039	6.03971	6.03081	6.0601	6.07956	0.958658	0.947948	0.947301	0.949647	0.953412	0.963874	6.14024	0.935607	0.938608	6.11286	0.958285	0.888458	86.001
LDM — alliciin_conf_13_LIDI_matrix
	S1	S2	O3	C4	C5	C6	C7	H8	H9	H10	H11	H12	H13	C14	H15	H16	C17	H18	H19
S1	12.9259	0.511509	0.695843	0.026785	0.0122199	0.0151127	0.00969636	0.00373351	0.00041963	0.000946909	0.000994933	0.000273155	0.000880382	0.466622	0.0235125	0.0240723	0.0231619	0.00360118	0.00657882		64.1366	21.8618	86
S2	0.511509	14.7509	0.0998972	0.0197022	0.0424853	0.0155183	0.0224903	0.00107579	0.00653898	0.00297304	0.000432001	0.00154359	0.00125223	0.0340314	0.00638795	0.0103631	0.534785	0.0279305	0.0276465
O3	0.695843	0.0998972	8.29646	0.00907132	0.00281598	0.00520882	0.00537866	0.000614667	0.000371858	0.000304493	0.000575993	0.000330134	0.00553513	0.0617228	0.00508756	0.006156	0.0134468	0.0155112	0.00155142
C4	0.026785	0.0197022	0.00907132	3.98133	0.000142715	0.915299	0.000167408	0.474028	1.20125e-05	0.0298502	0.0299493	1.22987e-05	2.64455e-05	0.520074	0.018756	0.0168841	0.00178807	0.00018694	0.000103135
C5	0.0122199	0.0424853	0.00281598	0.000142715	3.97672	0.000131549	0.917829	1.36013e-05	0.473975	5.39592e-05	5.19891e-06	0.0304511	0.0293363	0.00110353	8.77262e-05	0.000220618	0.514885	0.0173604	0.0188534
C6	0.0151127	0.0155183	0.00520882	0.915299	0.000131549	4.06786	0.000163587	0.029332	1.53406e-05	0.479237	0.482679	1.16832e-05	2.27188e-05	0.0375255	0.00989557	0.00586583	0.00105524	0.000220337	3.20314e-05
C7	0.00969636	0.0224903	0.00537866	0.000167408	0.917829	0.000163587	4.08293	1.30337e-05	0.02909	4.24596e-05	5.13089e-06	0.484178	0.476451	0.000585333	6.4458e-05	0.000209308	0.0364293	0.00580157	0.00892592
H8	0.00373351	0.00107579	0.000614667	0.474028	1.36013e-05	0.029332	1.30337e-05	0.409913	9.61996e-07	0.00668234	0.00367375	6.65174e-07	9.53059e-07	0.0200515	0.00131247	0.00506468	4.51002e-05	1.07106e-05	6.17078e-06
H9	0.00041963	0.00653898	0.000371858	1.20125e-05	0.473975	1.53406e-05	0.02909	9.61996e-07	0.413172	2.3683e-06	6.00791e-07	0.00364983	0.00660803	4.39196e-05	6.67491e-06	1.09548e-05	0.019935	0.00484832	0.00144476
H10	0.000946909	0.00297304	0.000304493	0.0298502	5.39592e-05	0.479237	4.24596e-05	0.00668234	2.3683e-06	0.405185	0.0164628	3.8656e-06	2.93913e-06	0.00622435	0.000489019	0.00368095	0.000155322	8.46079e-06	4.01829e-06
H11	0.000994933	0.000432001	0.000575993	0.0299493	5.19891e-06	0.482679	5.13089e-06	0.00367375	6.00791e-07	0.0164628	0.406417	3.2895e-07	1.92211e-06	0.0063074	0.000759637	0.000413624	2.28553e-05	8.02233e-06	1.50106e-06
H12	0.000273155	0.00154359	0.000330134	1.22987e-05	0.0304511	1.16832e-05	0.484178	6.65174e-07	0.00364983	3.8656e-06	3.2895e-07	0.412816	0.0163501	1.99849e-05	2.53815e-06	1.00027e-05	0.00632716	0.000400923	0.000800369
H13	0.000880382	0.00125223	0.00553513	2.64455e-05	0.0293363	2.27188e-05	0.476451	9.53059e-07	0.00660803	2.93913e-06	1.92211e-06	0.0163501	0.395263	0.000130728	8.22404e-06	1.3149e-05	0.00593041	0.00352279	0.000459042
C14	0.466622	0.0340314	0.0617228	0.520074	0.00110353	0.0375255	0.000585333	0.0200515	4.39196e-05	0.00622435	0.0063074	1.99849e-05	0.000130728	4.06783	0.462149	0.459234	0.00416569	0.000339409	0.000743456
H15	0.0235125	0.00638795	0.00508756	0.018756	8.77262e-05	0.00989557	6.4458e-05	0.00131247	6.67491e-06	0.000489019	0.000759637	2.53815e-06	8.22404e-06	0.462149	0.389341	0.0140243	0.00103466	6.93281e-05	0.00033173
H16	0.0240723	0.0103631	0.006156	0.0168841	0.000220618	0.00586583	0.000209308	0.00506468	1.09548e-05	0.00368095	0.000413624	1.00027e-05	1.3149e-05	0.459234	0.0140243	0.376525	0.000316499	3.60883e-05	4.48296e-05
C17	0.0231619	0.534785	0.0134468	0.00178807	0.514885	0.00105524	0.0364293	4.51002e-05	0.019935	0.000155322	2.28553e-05	0.00632716	0.00593041	0.00416569	0.00103466	0.000316499	4.01744	0.453793	0.464686
H18	0.00360118	0.0279305	0.0155112	0.00018694	0.0173604	0.000220337	0.00580157	1.07106e-05	0.00484832	8.46079e-06	8.02233e-06	0.000400923	0.00352279	0.000339409	6.93281e-05	3.60883e-05	0.453793	0.365994	0.0138507
H19	0.00657882	0.0276465	0.00155142	0.000103135	0.0188534	3.20314e-05	0.00892592	6.17078e-06	0.00144476	4.01829e-06	1.50106e-06	0.000800369	0.000459042	0.000743456	0.00033173	4.48296e-05	0.464686	0.0138507	0.394621
Total	14.7518	16.1174	9.22589	6.04417	6.03869	6.06519	6.08045	0.955573	0.960146	0.95231	0.948711	0.957182	0.941796	6.14891	0.933321	0.923146	6.0994	0.913493	0.940684	85.9983
LDM — alliciin_conf_14_LIDI_matrix
	S1	S2	O3	C4	C5	C6	C7	H8	H9	H10	H11	H12	H13	C14	H15	H16	C17	H18	H19
S1	12.9139	0.512705	0.697177	0.0329013	0.0129174	0.0195751	0.010473	0.0022589	0.000432301	0.000997138	0.00092084	0.000294031	0.000973553	0.46207	0.0244446	0.0200925	0.0226058	0.00633552	0.00340906		64.1498	21.8499	86
S2	0.512705	14.7791	0.101137	0.00693562	0.0423563	0.00348965	0.0228076	0.000514353	0.00644124	0.000313646	0.000259202	0.00155586	0.00128048	0.0385699	0.0098241	0.0106004	0.535525	0.0274112	0.0285525
O3	0.697177	0.101137	8.29097	0.0104799	0.00237856	0.00961881	0.00436802	0.000423353	0.000335457	0.000376057	0.00231628	0.000274322	0.00448745	0.0615118	0.00694691	0.00799569	0.0114213	0.00141839	0.0129396
C4	0.0329013	0.00693562	0.0104799	3.982	0.000112614	0.91745	0.000106407	0.4755	6.37019e-06	0.0300933	0.0293608	4.46062e-06	1.648e-05	0.51831	0.017463	0.0181116	0.00126356	0.000323566	7.4727e-05
C5	0.0129174	0.0423563	0.00237856	0.000112614	3.97571	0.000109218	0.917353	1.11379e-05	0.47389	7.64077e-06	4.96873e-06	0.0303568	0.0294188	0.00117395	0.000240198	9.01347e-05	0.515136	0.0187834	0.0174603
C6	0.0195751	0.00348965	0.00961881	0.91745	0.000109218	4.06842	3.95018e-05	0.0297644	5.05027e-06	0.483073	0.478317	1.2124e-06	8.0314e-06	0.0375809	0.00655647	0.00723062	0.000552816	0.000246055	5.86689e-05
C7	0.010473	0.0228076	0.00436802	0.000106407	0.917353	3.95018e-05	4.0818	9.6188e-06	0.0290477	4.91293e-06	3.59864e-06	0.483951	0.476986	0.000670779	0.000231739	0.000112911	0.036579	0.00890351	0.005921
H8	0.0022589	0.000514353	0.000423353	0.4755	1.11379e-05	0.0297644	9.6188e-06	0.413658	1.01754e-06	0.00368006	0.00668675	6.13317e-07	1.03077e-06	0.0201494	0.00443738	0.00212648	4.07512e-05	9.87415e-06	5.76947e-06
H9	0.000432301	0.00644124	0.000335457	6.37019e-06	0.47389	5.05027e-06	0.0290477	1.01754e-06	0.412726	2.90274e-07	3.15328e-07	0.0036389	0.00662288	4.39806e-05	1.08254e-05	8.12591e-06	0.0199213	0.00144429	0.0048856
H10	0.000997138	0.000313646	0.000376057	0.0300933	7.64077e-06	0.483073	4.91293e-06	0.00368006	2.90274e-07	0.407983	0.0163853	1.77494e-07	5.05492e-07	0.00633546	0.000428529	0.000810599	7.88328e-05	2.08893e-05	3.05933e-06
H11	0.00092084	0.000259202	0.00231628	0.0293608	4.96873e-06	0.478317	3.59864e-06	0.00668675	3.15328e-07	0.0163853	0.400765	2.14251e-07	1.26286e-06	0.00611271	0.00329635	0.000439043	3.09829e-05	1.0896e-05	4.48061e-06
H12	0.000294031	0.00155586	0.000274322	4.46062e-06	0.0303568	1.2124e-06	0.483951	6.13317e-07	0.0036389	1.77494e-07	2.14251e-07	0.411779	0.0163682	2.35708e-05	1.08973e-05	7.46296e-06	0.00632278	0.000800596	0.000410365
H13	0.000973553	0.00128048	0.00448745	1.648e-05	0.0294188	8.0314e-06	0.476986	1.03077e-06	0.00662288	5.05492e-07	1.26286e-06	0.0163682	0.396802	0.000113923	1.63327e-05	1.94301e-05	0.00602012	0.000464017	0.00364668
C14	0.46207	0.0385699	0.0615118	0.51831	0.00117395	0.0375809	0.000670779	0.0201494	4.39806e-05	0.00633546	0.00611271	2.35708e-05	0.000113923	4.06781	0.458766	0.465333	0.00463826	0.000713924	0.000366345
H15	0.0244446	0.0098241	0.00694691	0.017463	0.000240198	0.00655647	0.000231739	0.00443738	1.08254e-05	0.000428529	0.00329635	1.08973e-05	1.63327e-05	0.458766	0.373917	0.0140812	0.000343603	2.14616e-05	3.67403e-05
H16	0.0200925	0.0106004	0.00799569	0.0181116	9.01347e-05	0.00723062	0.000112911	0.00212648	8.12591e-06	0.000810599	0.000439043	7.46296e-06	1.94301e-05	0.465333	0.0140812	0.392822	0.000989911	5.5467e-05	0.000135538
C17	0.0226058	0.535525	0.0114213	0.00126356	0.515136	0.000552816	0.036579	4.07512e-05	0.0199213	7.88328e-05	3.09829e-05	0.00632278	0.00602012	0.00463826	0.000343603	0.000989911	4.01686	0.464757	0.455297
H18	0.00633552	0.0274112	0.00141839	0.000323566	0.0187834	0.000246055	0.00890351	9.87415e-06	0.00144429	2.08893e-05	1.0896e-05	0.000800596	0.000464017	0.000713924	2.14616e-05	5.5467e-05	0.464757	0.393729	0.0139554
H19	0.00340906	0.0285525	0.0129396	7.4727e-05	0.0174603	5.86689e-05	0.005921	5.76947e-06	0.0048856	3.05933e-06	4.48061e-06	0.000410365	0.00364668	0.000366345	3.67403e-05	0.000135538	0.455297	0.0139554	0.369042
Total	14.7445	16.1294	9.22658	6.04051	6.03752	6.0621	6.07937	0.959278	0.959462	0.950593	0.944917	0.955801	0.943248	6.1503	0.921074	0.941063	6.09839	0.939404	0.916205	85.9997
LDM — alliciin_conf_15_LIDI_matrix
	S1	S2	O3	C4	C5	C6	C7	H8	H9	H10	H11	H12	H13	C14	H15	H16	C17	H18	H19
S1	12.9487	0.509451	0.695051	0.0316265	0.00242392	0.0206438	0.00109724	0.00155496	0.00109364	0.000941292	0.00120488	9.90832e-05	0.000124899	0.463705	0.0224235	0.0241779	0.0244083	0.007169	0.00469547		64.15	21.8486	86
S2	0.509451	14.7669	0.095413	0.0154965	0.0417127	0.00363742	0.0243868	0.0134053	0.00170413	0.000153227	0.000404408	0.00149785	0.00133551	0.0361955	0.00814431	0.00516987	0.536296	0.028221	0.0280007
O3	0.695051	0.095413	8.28433	0.00988949	0.00487835	0.00613307	0.000914067	0.000542152	0.00620245	0.000495906	0.000369004	9.40363e-05	0.00024155	0.0616802	0.00472817	0.00529024	0.0199794	0.00192054	0.0222969
C4	0.0316265	0.0154965	0.00988949	3.98229	0.000297363	0.918647	9.55234e-05	0.468921	0.000279373	0.0298453	0.0301674	4.96599e-06	9.08369e-06	0.518846	0.0179054	0.0174093	0.000728239	8.2401e-05	0.000168188
C5	0.00242392	0.0417127	0.00487835	0.000297363	3.96953	0.000130933	0.921642	0.000252458	0.467524	2.01932e-05	1.58158e-05	0.0304233	0.0304244	0.00341786	0.000232126	0.00774674	0.514812	0.0182378	0.0177703
C6	0.0206438	0.00363742	0.00613307	0.918647	0.000130933	4.0807	0.000124236	0.0283927	0.000193099	0.482926	0.481076	5.29712e-06	8.66999e-06	0.0383538	0.00676063	0.00728632	0.000372448	2.1865e-05	6.90245e-05
C7	0.00109724	0.0243868	0.000914067	9.55234e-05	0.921642	0.000124236	4.08444	0.000125402	0.0291903	9.26645e-06	9.68605e-06	0.484048	0.481603	0.000810933	5.65135e-05	0.00183597	0.0366869	0.00647186	0.00681284
H8	0.00155496	0.0134053	0.000542152	0.468921	0.000252458	0.0283927	0.000125402	0.392418	2.5519e-05	0.00356457	0.00654423	4.86697e-06	5.71895e-06	0.0189962	0.00444625	0.00184403	0.000434581	3.08392e-05	0.000153954
H9	0.00109364	0.00170413	0.00620245	0.000279373	0.467524	0.000193099	0.0291903	2.5519e-05	0.401975	2.48087e-05	9.11939e-06	0.00362271	0.00661028	0.00401319	0.000176934	0.00790457	0.0189512	0.00460071	0.00174258
H10	0.000941292	0.000153227	0.000495906	0.0298453	2.01932e-05	0.482926	9.26645e-06	0.00356457	2.48087e-05	0.405786	0.0167124	6.19406e-07	1.1017e-06	0.00638089	0.000468091	0.000783868	1.4038e-05	5.5874e-07	2.93919e-06
H11	0.00120488	0.000404408	0.000369004	0.0301674	1.58158e-05	0.481076	9.68605e-06	0.00654423	9.11939e-06	0.0167124	0.411677	5.58185e-07	7.03193e-07	0.00629708	0.00356649	0.000454347	3.2027e-05	4.86105e-06	5.70728e-06
H12	9.90832e-05	0.00149785	9.40363e-05	4.96599e-06	0.0304233	5.29712e-06	0.484048	4.86697e-06	0.00362271	6.19406e-07	5.58185e-07	0.411212	0.0169857	5.05343e-05	3.36299e-06	9.25441e-05	0.00637002	0.000450365	0.000750581
H13	0.000124899	0.00133551	0.00024155	9.08369e-06	0.0304244	8.66999e-06	0.481603	5.71895e-06	0.00661028	1.1017e-06	7.03193e-07	0.0169857	0.415056	8.98967e-05	8.37677e-06	0.000175852	0.00619515	0.0036536	0.000407804
C14	0.463705	0.0361955	0.0616802	0.518846	0.00341786	0.0383538	0.000810933	0.0189962	0.00401319	0.00638089	0.00629708	5.05343e-05	8.98967e-05	4.06319	0.462796	0.457421	0.00131122	0.000373343	0.000205605
H15	0.0224235	0.00814431	0.00472817	0.0179054	0.000232126	0.00676063	5.65135e-05	0.00444625	0.000176934	0.000468091	0.00356649	3.36299e-06	8.37677e-06	0.462796	0.392364	0.0140218	0.000302662	0.000206767	3.14149e-05
H16	0.0241779	0.00516987	0.00529024	0.0174093	0.00774674	0.00728632	0.00183597	0.00184403	0.00790457	0.000783868	0.000454347	9.25441e-05	0.000175852	0.457421	0.0140218	0.376942	0.000649955	9.68047e-05	6.35747e-05
C17	0.0244083	0.536296	0.0199794	0.000728239	0.514812	0.000372448	0.0366869	0.000434581	0.0189512	1.4038e-05	3.2027e-05	0.00637002	0.00619515	0.00131122	0.000302662	0.000649955	4.01872	0.463143	0.448689
H18	0.007169	0.028221	0.00192054	8.2401e-05	0.0182378	2.1865e-05	0.00647186	3.08392e-05	0.00460071	5.5874e-07	4.86105e-06	0.000450365	0.0036536	0.000373343	0.000206767	9.68047e-05	0.463143	0.392217	0.0132822
H19	0.00469547	0.0280007	0.0222969	0.000168188	0.0177703	6.90245e-05	0.00681284	0.000153954	0.00174258	2.93919e-06	5.70728e-06	0.000750581	0.000407804	0.000205605	3.14149e-05	6.35747e-05	0.448689	0.0132822	0.351488
Total	14.7606	16.1176	9.22045	6.04271	6.03149	6.07548	6.08036	0.941663	0.955844	0.948131	0.958551	0.955717	0.962937	6.14413	0.938643	0.929366	6.09809	0.940184	0.896636	85.9986
LDM — alliciin_conf_16_LIDI_matrix
	S1	S2	O3	C4	C5	C6	C7	H8	H9	H10	H11	H12	H13	C14	H15	H16	C17	H18	H19
S1	12.9639	0.512157	0.695275	0.0312148	0.00260882	0.0178122	0.00107312	0.00309417	0.00120375	0.000934548	0.000911986	9.26576e-05	0.000125631	0.461826	0.0232812	0.0224414	0.0245921	0.00737375	0.00430177		64.1433	21.8556	86
S2	0.512157	14.7506	0.0949557	0.0127871	0.0408644	0.0158622	0.0241404	0.000525984	0.00158587	0.000436376	0.00681892	0.00149505	0.00135449	0.0368222	0.0074594	0.00750242	0.535528	0.0280955	0.0281935
O3	0.695275	0.0949557	8.28431	0.00924265	0.00632101	0.00580881	0.00100693	0.000527248	0.00844401	0.000533205	0.000322976	9.71282e-05	0.000282872	0.0614007	0.0037645	0.00644143	0.0197609	0.00192946	0.0201279
C4	0.0312148	0.0127871	0.00924265	3.98388	0.000335169	0.915818	0.000115835	0.475028	0.000332194	0.0300184	0.029006	5.98157e-06	1.06559e-05	0.5206	0.0169761	0.0185282	0.000744025	7.39215e-05	0.000172071
C5	0.00260882	0.0408644	0.00632101	0.000335169	3.97094	0.000279343	0.920903	0.000152726	0.466341	2.31212e-05	0.000645448	0.0304439	0.0304076	0.0039788	0.00894855	0.000217458	0.514338	0.0182208	0.0178849
C6	0.0178122	0.0158622	0.00580881	0.915818	0.000279343	4.06944	0.000266453	0.029715	6.38567e-05	0.482946	0.476965	7.5431e-06	7.42972e-06	0.0374866	0.00601385	0.00807306	0.000678474	3.20525e-05	0.000181442
C7	0.00107312	0.0241404	0.00100693	0.000115835	0.920903	0.000266453	4.08662	7.69577e-05	0.0287832	2.54856e-05	0.000553973	0.484167	0.481722	0.00110933	0.00264115	5.93182e-05	0.0366373	0.0064889	0.00682597
H8	0.00309417	0.000525984	0.000527248	0.475028	0.000152726	0.029715	7.69577e-05	0.41226	0.000123093	0.00368035	0.00662709	2.85354e-06	4.33206e-06	0.0200652	0.00448788	0.00190183	5.22335e-05	1.03516e-05	7.44085e-06
H9	0.00120375	0.00158587	0.00844401	0.000332194	0.466341	6.38567e-05	0.0287832	0.000123093	0.396313	3.22934e-06	4.03336e-05	0.0035951	0.00657062	0.003617	0.00664092	0.000131983	0.0187115	0.00456593	0.00172891
H10	0.000934548	0.000436376	0.000533205	0.0300184	2.31212e-05	0.482946	2.54856e-05	0.00368035	3.22934e-06	0.407421	0.0162805	5.45717e-07	3.95551e-07	0.00629722	0.000403121	0.000784863	1.77244e-05	8.61927e-07	5.44571e-06
H11	0.000911986	0.00681892	0.000322976	0.029006	0.000645448	0.476965	0.000553973	0.00662709	4.03336e-05	0.0162805	0.398287	1.86111e-05	1.66035e-05	0.00591622	0.00316779	0.000460784	0.000160929	8.74436e-06	8.31615e-05
H12	9.26576e-05	0.00149505	9.71282e-05	5.98157e-06	0.0304439	7.5431e-06	0.484167	2.85354e-06	0.0035951	5.45717e-07	1.86111e-05	0.411517	0.0170239	5.66259e-05	0.000113256	3.40093e-06	0.00638892	0.000451735	0.000765066
H13	0.000125631	0.00135449	0.000282872	1.06559e-05	0.0304076	7.42972e-06	0.481722	4.33206e-06	0.00657062	3.95551e-07	1.66035e-05	0.0170239	0.415382	8.86027e-05	0.000161165	6.57967e-06	0.00617359	0.00363445	0.000409357
C14	0.461826	0.0368222	0.0614007	0.5206	0.0039788	0.0374866	0.00110933	0.0200652	0.003617	0.00629722	0.00591622	5.66259e-05	8.86027e-05	4.06421	0.455917	0.463352	0.00132018	0.000354757	0.000211993
H15	0.0232812	0.0074594	0.0037645	0.0169761	0.00894855	0.00601385	0.00264115	0.00448788	0.00664092	0.000403121	0.00316779	0.000113256	0.000161165	0.455917	0.373664	0.0139445	0.000722862	0.000108196	7.1957e-05
H16	0.0224414	0.00750242	0.00644143	0.0185282	0.000217458	0.00807306	5.93182e-05	0.00190183	0.000131983	0.000784863	0.000460784	3.40093e-06	6.57967e-06	0.463352	0.0139445	0.389932	0.000270655	0.000171672	2.54775e-05
C17	0.0245921	0.535528	0.0197609	0.000744025	0.514338	0.000678474	0.0366373	5.22335e-05	0.0187115	1.77244e-05	0.000160929	0.00638892	0.00617359	0.00132018	0.000722862	0.000270655	4.01626	0.463106	0.450522
H18	0.00737375	0.0280955	0.00192946	7.39215e-05	0.0182208	3.20525e-05	0.0064889	1.03516e-05	0.00456593	8.61927e-07	8.74436e-06	0.000451735	0.00363445	0.000354757	0.000108196	0.000171672	0.463106	0.392983	0.0134167
H19	0.00430177	0.0281935	0.0201279	0.000172071	0.0178849	0.000181442	0.00682597	7.44085e-06	0.00172891	5.44571e-06	8.31615e-05	0.000765066	0.000409357	0.000211993	7.1957e-05	2.54775e-05	0.450522	0.0134167	0.355376
Total	14.7743	16.1072	9.22056	6.04489	6.03385	6.06746	6.08322	0.958343	0.948796	0.949813	0.946292	0.956246	0.963382	6.14463	0.928487	0.934249	6.09598	0.941026	0.900311	85.999
LDM — alliciin_conf_17_LIDI_matrix
	S1	S2	O3	C4	C5	C6	C7	H8	H9	H10	H11	H12	H13	C14	H15	H16	C17	H18	H19
S1	12.9356	0.520467	0.693892	0.0297028	0.00660445	0.0193632	0.00350118	0.00161043	0.000470568	0.00101958	0.000921134	0.000277152	0.000255771	0.462526	0.0221268	0.0245532	0.0248776	0.0016011	0.00640515		64.1413	21.859	86
S2	0.520467	14.7488	0.0986445	0.0164976	0.0412827	0.00371632	0.0204379	0.014084	0.00381995	0.000398775	0.000154676	0.00130124	0.00113792	0.0357356	0.00821507	0.00379348	0.533636	0.0310576	0.0253193
O3	0.693892	0.0986445	8.29148	0.00984727	0.00177748	0.00592453	0.00102768	0.000605965	0.000699078	0.000353967	0.000514948	7.07177e-05	0.000391109	0.0633909	0.00518786	0.00637537	0.0162338	0.000744806	0.0259282
C4	0.0297028	0.0164976	0.00984727	3.97979	0.000127085	0.919372	7.78658e-05	0.469174	8.46119e-06	0.0301904	0.029895	7.84447e-06	5.05191e-06	0.519601	0.0177311	0.0176738	0.000606915	0.000373827	0.000130544
C5	0.00660445	0.0412827	0.00177748	0.000127085	3.97122	3.18409e-05	0.923089	7.64649e-05	0.474972	5.99916e-06	3.73702e-06	0.030447	0.0299864	0.000690509	0.000123234	0.000718069	0.514315	0.0197424	0.0161235
C6	0.0193632	0.00371632	0.00592453	0.919372	3.18409e-05	4.07965	4.61726e-05	0.0284312	6.29532e-06	0.480971	0.482941	3.24112e-06	3.22353e-06	0.0384499	0.00662744	0.00789824	0.000398043	0.00010067	7.36814e-05
C7	0.00350118	0.0204379	0.00102768	7.78658e-05	0.923089	4.61726e-05	4.07559	5.49781e-05	0.0298604	6.4599e-06	2.27642e-06	0.483547	0.47954	0.000226337	0.000113585	0.000185479	0.0372638	0.00842423	0.00626241
H8	0.00161043	0.014084	0.000605965	0.469174	7.64649e-05	0.0284312	5.49781e-05	0.396292	4.25016e-06	0.00655764	0.00358455	5.38276e-06	2.86392e-06	0.0191272	0.00459549	0.00169757	0.000505501	0.000366138	6.09956e-05
H9	0.000470568	0.00381995	0.000699078	8.46119e-06	0.474972	6.29532e-06	0.0298604	4.25016e-06	0.416038	3.57886e-07	5.01658e-07	0.00365899	0.00672721	4.13606e-05	1.11559e-05	4.89647e-05	0.0201456	0.00153757	0.00448706
H10	0.00101958	0.000398775	0.000353967	0.0301904	5.99916e-06	0.480971	6.4599e-06	0.00655764	3.57886e-07	0.411391	0.0166878	5.10002e-07	3.32612e-07	0.00634738	0.00372197	0.000470776	3.61631e-05	2.39893e-05	4.491e-06
H11	0.000921134	0.000154676	0.000514948	0.029895	3.73702e-06	0.482941	2.27642e-06	0.00358455	5.01658e-07	0.0166878	0.405886	2.78382e-07	1.8994e-07	0.00634154	0.000465237	0.000805474	2.82442e-05	1.32894e-05	7.11356e-06
H12	0.000277152	0.00130124	7.07177e-05	7.84447e-06	0.030447	3.24112e-06	0.483547	5.38276e-06	0.00365899	5.10002e-07	2.78382e-07	0.410472	0.0166011	2.74836e-05	5.88573e-06	3.398e-05	0.00633906	0.000808005	0.000470738
H13	0.000255771	0.00113792	0.000391109	5.05191e-06	0.0299864	3.22353e-06	0.47954	2.86392e-06	0.00672721	3.32612e-07	1.8994e-07	0.0166011	0.405116	2.06956e-05	4.5007e-06	1.48525e-05	0.00631111	0.000480433	0.00387151
C14	0.462526	0.0357356	0.0633909	0.519601	0.000690509	0.0384499	0.000226337	0.0191272	4.13606e-05	0.00634738	0.00634154	2.74836e-05	2.06956e-05	4.05939	0.461955	0.459744	0.00453944	0.00265074	0.000827044
H15	0.0221268	0.00821507	0.00518786	0.0177311	0.000123234	0.00662744	0.000113585	0.00459549	1.11559e-05	0.00372197	0.000465237	5.88573e-06	4.5007e-06	0.461955	0.389512	0.0143337	0.00036328	0.00021783	5.76532e-05
H16	0.0245532	0.00379348	0.00637537	0.0176738	0.000718069	0.00789824	0.000185479	0.00169757	4.89647e-05	0.000470776	0.000805474	3.398e-05	1.48525e-05	0.459744	0.0143337	0.384265	0.0056207	0.0042422	0.0013819
C17	0.0248776	0.533636	0.0162338	0.000606915	0.514315	0.000398043	0.0372638	0.000505501	0.0201456	3.61631e-05	2.82442e-05	0.00633906	0.00631111	0.00453944	0.00036328	0.0056207	4.02521	0.467044	0.444219
H18	0.0016011	0.0310576	0.000744806	0.000373827	0.0197424	0.00010067	0.00842423	0.000366138	0.00153757	2.39893e-05	1.32894e-05	0.000808005	0.000480433	0.00265074	0.00021783	0.0042422	0.467044	0.407052	0.01399
H19	0.00640515	0.0253193	0.0259282	0.000130544	0.0161235	7.36814e-05	0.00626241	6.09956e-05	0.00448706	4.491e-06	7.11356e-06	0.000470738	0.00387151	0.000827044	5.76532e-05	0.0013819	0.444219	0.01399	0.348516
Total	14.7558	16.1085	9.22309	6.04081	6.03133	6.07401	6.06926	0.946836	0.962537	0.958189	0.948253	0.954077	0.95047	6.14163	0.935369	0.933857	6.10769	0.960471	0.898136	86.0003
LDM — alliciin_conf_18_LIDI_matrix
	S1	S2	O3	C4	C5	C6	C7	H8	H9	H10	H11	H12	H13	C14	H15	H16	C17	H18	H19
S1	12.9539	0.510543	0.694214	0.0323911	0.00248693	0.0186114	0.00111514	0.00180696	0.00118926	0.000829641	0.000997919	0.000127384	9.71216e-05	0.46553	0.0213403	0.0243482	0.0241207	0.00445001	0.00717372		64.1653	21.8354	86
S2	0.510543	14.7849	0.0948264	0.0084853	0.0411328	0.00368034	0.0240861	0.000420193	0.00165285	0.000215092	0.000452583	0.0012899	0.00150976	0.0398705	0.00776104	0.00788985	0.536281	0.0285477	0.0280999
O3	0.694214	0.0948264	8.2797	0.0109389	0.00606245	0.00370312	0.00100181	0.00616375	0.00816798	0.000407969	0.000220324	0.000269221	9.85612e-05	0.0608172	0.00819522	0.00450677	0.0195557	0.0204072	0.00189068
C4	0.0323911	0.0084853	0.0109389	3.98389	0.000282415	0.920915	8.12894e-05	0.470231	0.000207998	0.0304005	0.0299715	9.41919e-06	4.94858e-06	0.517466	0.017472	0.0176799	0.000423478	4.93955e-05	0.000215499
C5	0.00248693	0.0411328	0.00606245	0.000282415	3.97012	0.000258084	0.921368	3.66683e-05	0.466712	1.26337e-05	2.56046e-05	0.0304221	0.0304204	0.00372035	0.000228134	0.00857496	0.514649	0.0178522	0.0181656
C6	0.0186114	0.00368034	0.00370312	0.920915	0.000258084	4.07958	0.000111978	0.0284445	0.000173014	0.481244	0.482929	9.6007e-06	5.5959e-06	0.0383896	0.00636297	0.00880957	0.000211561	1.6025e-05	0.000128236
C7	0.00111514	0.0240861	0.00100181	8.12894e-05	0.921368	0.000111978	4.08428	6.47396e-06	0.0289106	5.42529e-06	9.0006e-06	0.481666	0.484008	0.000946234	5.80343e-05	0.00236205	0.0368592	0.00700126	0.00646856
H8	0.00180696	0.000420193	0.00616375	0.470231	3.66683e-05	0.0284445	6.47396e-06	0.394691	6.6774e-05	0.00660597	0.00357339	3.32055e-06	1.18773e-06	0.0190683	0.00494694	0.00135249	3.98271e-05	1.16166e-05	7.99115e-06
H9	0.00118926	0.00165285	0.00816798	0.000207998	0.466712	0.000173014	0.0289106	6.6774e-05	0.3984	1.26679e-05	1.74259e-05	0.00657112	0.00360065	0.00370705	0.000257918	0.00700108	0.0188235	0.00168225	0.00462315
H10	0.000829641	0.000215092	0.000407969	0.0304005	1.26337e-05	0.481244	5.42529e-06	0.00660597	1.26679e-05	0.412932	0.0167542	5.77183e-07	3.37691e-07	0.00638553	0.00395321	0.000450681	1.24246e-05	1.33886e-06	6.33224e-06
H11	0.000997919	0.000452583	0.000220324	0.0299715	2.56046e-05	0.482929	9.0006e-06	0.00357339	1.74259e-05	0.0167542	0.406253	1.06733e-06	5.49023e-07	0.00636141	0.000454106	0.000737636	1.54791e-05	1.19866e-06	1.11396e-05
H12	0.000127384	0.0012899	0.000269221	9.41919e-06	0.0304221	9.6007e-06	0.481666	3.32055e-06	0.00657112	5.77183e-07	1.06733e-06	0.415053	0.0169823	8.704e-05	6.70698e-06	0.000164313	0.00620556	0.000411787	0.00370412
H13	9.71216e-05	0.00150976	9.85612e-05	4.94858e-06	0.0304204	5.5959e-06	0.484008	1.18773e-06	0.00360065	3.37691e-07	5.49023e-07	0.0169823	0.411059	5.29616e-05	3.67464e-06	0.000103656	0.00637899	0.000756342	0.000452018
C14	0.46553	0.0398705	0.0608172	0.517466	0.00372035	0.0383896	0.000946234	0.0190683	0.00370705	0.00638553	0.00636141	8.704e-05	5.29616e-05	4.06229	0.463401	0.455082	0.00145174	0.000256608	0.000332502
H15	0.0213403	0.00776104	0.00819522	0.017472	0.000228134	0.00636297	5.80343e-05	0.00494694	0.000257918	0.00395321	0.000454106	6.70698e-06	3.67464e-06	0.463401	0.393092	0.0138469	0.000415164	0.000129374	3.61641e-05
H16	0.0243482	0.00788985	0.00450677	0.0176799	0.00857496	0.00880957	0.00236205	0.00135249	0.00700108	0.000450681	0.000737636	0.000164313	0.000103656	0.455082	0.0138469	0.372497	0.000707085	8.15299e-05	9.22389e-05
C17	0.0241207	0.536281	0.0195557	0.000423478	0.514649	0.000211561	0.0368592	3.98271e-05	0.0188235	1.24246e-05	1.54791e-05	0.00620556	0.00637899	0.00145174	0.000415164	0.000707085	4.01564	0.449981	0.463076
H18	0.00445001	0.0285477	0.0204072	4.93955e-05	0.0178522	1.6025e-05	0.00700126	1.16166e-05	0.00168225	1.33886e-06	1.19866e-06	0.000411787	0.000756342	0.000256608	0.000129374	8.15299e-05	0.449981	0.354678	0.0133868
H19	0.00717372	0.0280999	0.00189068	0.000215499	0.0181656	0.000128236	0.00646856	7.99115e-06	0.00462315	6.33224e-06	1.11396e-05	0.00370412	0.000452018	0.000332502	3.61641e-05	9.22389e-05	0.463076	0.0133868	0.392349
Total	14.7652	16.1216	9.22115	6.04112	6.03253	6.07358	6.08035	0.937479	0.951776	0.960231	0.948786	0.962984	0.955536	6.14521	0.94196	0.926287	6.09485	0.899702	0.94022	86.0006
LDM — alliciin_conf_19_LIDI_matrix
	S1	S2	O3	C4	C5	C6	C7	H8	H9	H10	H11	H12	H13	C14	H15	H16	C17	H18	H19
S1	12.94	0.520167	0.692563	0.0316241	0.00608733	0.0179556	0.00326033	0.00180884	0.00047932	0.000987868	0.000785343	0.0002472	0.000263294	0.463855	0.0202392	0.0248547	0.0247631	0.00698705	0.00176568		64.158	21.8402	86
S2	0.520167	14.77	0.0979808	0.00866565	0.0414893	0.00389415	0.0206754	0.000472479	0.00368356	0.00046024	0.000231201	0.00133713	0.00113096	0.0396115	0.00891977	0.00558567	0.533966	0.0250671	0.0310402
O3	0.692563	0.0979808	8.28366	0.0114835	0.00170561	0.0036739	0.00103243	0.00680235	0.000693423	0.00022839	0.000417024	7.46057e-05	0.00052455	0.0619834	0.00817202	0.00551276	0.0170951	0.028217	0.000819154
C4	0.0316241	0.00866565	0.0114835	3.98401	0.000150828	0.921318	0.00012158	0.469641	1.45358e-05	0.0299941	0.0304418	7.07351e-06	5.7079e-06	0.516758	0.0173331	0.0183201	0.000444233	8.17642e-05	0.000233581
C5	0.00608733	0.0414893	0.00170561	0.000150828	3.97062	0.000165594	0.923202	8.06501e-06	0.475056	1.04085e-05	8.09211e-06	0.0304596	0.0299437	0.000663204	8.99152e-05	0.000722309	0.514321	0.0160093	0.0196866
C6	0.0179556	0.00389415	0.0036739	0.921318	0.000165594	4.07983	3.60333e-05	0.0282451	1.1488e-05	0.482896	0.481318	6.72374e-06	3.19677e-06	0.0383151	0.00629599	0.00907436	0.000314221	6.98039e-05	0.00018341
C7	0.00326033	0.0206754	0.00103243	0.00012158	0.923202	3.60333e-05	4.07602	4.63299e-06	0.0298809	6.00325e-06	3.04578e-06	0.483621	0.479474	0.000217158	4.31524e-05	0.000191234	0.0373023	0.00628375	0.00837419
H8	0.00180884	0.000472479	0.00680235	0.469641	8.06501e-06	0.0282451	4.63299e-06	0.392395	1.19427e-06	0.00356123	0.00658092	4.14916e-07	4.73604e-07	0.0190098	0.00490095	0.00137338	2.36731e-05	9.59977e-06	7.63791e-06
H9	0.00047932	0.00368356	0.000693423	1.45358e-05	0.475056	1.1488e-05	0.0298809	1.19427e-06	0.416332	1.15815e-06	6.55186e-07	0.00365764	0.00672304	4.50584e-05	5.31299e-06	5.13288e-05	0.0201472	0.00444673	0.00151106
H10	0.000987868	0.00046024	0.00022839	0.0299941	1.04085e-05	0.482896	6.00325e-06	0.00356123	1.15815e-06	0.406087	0.016754	4.83931e-07	3.11646e-07	0.00635732	0.000450638	0.000758511	2.98323e-05	5.93352e-06	1.79684e-05
H11	0.000785343	0.000231201	0.000417024	0.0304418	8.09211e-06	0.481318	3.04578e-06	0.00658092	6.55186e-07	0.016754	0.413172	3.73307e-07	2.23959e-07	0.00637589	0.00394004	0.00046579	1.66157e-05	4.10145e-06	7.74405e-06
H12	0.0002472	0.00133713	7.46057e-05	7.07351e-06	0.0304596	6.72374e-06	0.483621	4.14916e-07	0.00365764	4.83931e-07	3.73307e-07	0.410794	0.0166027	2.59436e-05	4.52876e-06	3.43393e-05	0.00634102	0.000471604	0.000809135
H13	0.000263294	0.00113096	0.00052455	5.7079e-06	0.0299437	3.19677e-06	0.479474	4.73604e-07	0.00672304	3.11646e-07	2.23959e-07	0.0166027	0.40486	2.2385e-05	3.02551e-06	1.49624e-05	0.00630504	0.00387988	0.000472666
C14	0.463855	0.0396115	0.0619834	0.516758	0.000663204	0.0383151	0.000217158	0.0190098	4.50584e-05	0.00635732	0.00637589	2.59436e-05	2.2385e-05	4.05663	0.463713	0.458818	0.0042983	0.000883068	0.00226027
H15	0.0202392	0.00891977	0.00817202	0.0173331	8.99152e-05	0.00629599	4.31524e-05	0.00490095	5.31299e-06	0.000450638	0.00394004	4.52876e-06	3.02551e-06	0.463713	0.39147	0.0141437	0.000363452	0.000106322	0.000114796
H16	0.0248547	0.00558567	0.00551276	0.0183201	0.000722309	0.00907436	0.000191234	0.00137338	5.13288e-05	0.000758511	0.00046579	3.43393e-05	1.49624e-05	0.458818	0.0141437	0.384272	0.00576721	0.00141768	0.00396549
C17	0.0247631	0.533966	0.0170951	0.000444233	0.514321	0.000314221	0.0373023	2.36731e-05	0.0201472	2.98323e-05	1.66157e-05	0.00634102	0.00630504	0.0042983	0.000363452	0.00576721	4.02722	0.44215	0.467352
H18	0.00698705	0.0250671	0.028217	8.17642e-05	0.0160093	6.98039e-05	0.00628375	9.59977e-06	0.00444673	5.93352e-06	4.10145e-06	0.000471604	0.00387988	0.000883068	0.000106322	0.00141768	0.44215	0.345194	0.0138153
H19	0.00176568	0.0310402	0.000819154	0.000233581	0.0196866	0.00018341	0.00837419	7.63791e-06	0.00151106	1.79684e-05	7.74405e-06	0.000809135	0.000472666	0.00226027	0.000114796	0.00396549	0.467352	0.0138153	0.405421
Total	14.7587	16.1144	9.22264	6.04064	6.0304	6.07361	6.06975	0.934847	0.962741	0.948608	0.960523	0.954496	0.95023	6.13985	0.940309	0.935343	6.10822	0.895099	0.957858	85.9983
LDM — alliciin_conf_20_LIDI_matrix
	S1	S2	O3	C4	C5	C6	C7	H8	H9	H10	H11	H12	H13	C14	H15	H16	C17	H18	H19
S1	12.9183	0.530311	0.700318	0.0282301	0.00606498	0.0169723	0.00104252	0.00245155	0.00766154	0.000765747	0.00138559	0.000111537	0.000293897	0.465484	0.0200151	0.0237905	0.0260117	0.00555867	0.00656979		64.1165	21.8819	86
S2	0.530311	14.7131	0.103743	0.022522	0.0430521	0.0133166	0.0209958	0.00167742	0.00445426	0.00123711	0.000412611	0.00150884	0.00100709	0.034403	0.00807476	0.00660139	0.533599	0.0262254	0.0286077
O3	0.700318	0.103743	8.30905	0.0110633	0.000837124	0.00311724	0.000342981	0.00975177	0.000755982	0.000490541	0.000327174	3.95664e-05	4.61205e-05	0.0613534	0.00816798	0.00474658	0.00525295	0.000959018	0.00616118
C4	0.0282301	0.022522	0.0110633	3.97587	0.000271621	0.916895	0.000220662	0.466356	9.53971e-05	0.0304504	0.029977	1.86076e-05	1.12107e-05	0.516384	0.0171565	0.0187105	0.00170713	6.89947e-05	0.000126103
C5	0.00606498	0.0430521	0.000837124	0.000271621	3.97155	0.000219568	0.924403	2.32788e-05	0.471318	1.14422e-05	9.39746e-06	0.0304753	0.0306883	0.000455326	6.52373e-05	4.18142e-05	0.515588	0.0182306	0.0188097
C6	0.0169723	0.0133166	0.00311724	0.916895	0.000219568	4.07255	0.000173454	0.0273908	9.58283e-05	0.481149	0.482695	1.22227e-05	9.75423e-06	0.0378669	0.00592688	0.0103844	0.000922231	7.09839e-05	0.000114646
C7	0.00104252	0.0209958	0.000342981	0.000220662	0.924403	0.000173454	4.08314	1.28287e-05	0.0291157	7.36285e-06	5.60119e-06	0.48388	0.481533	0.000224799	1.23885e-05	3.85053e-05	0.0370352	0.00650819	0.00920421
H8	0.00245155	0.00167742	0.00975177	0.466356	2.32788e-05	0.0273908	1.28287e-05	0.383606	5.77774e-06	0.00641811	0.00350531	1.25424e-06	7.34064e-07	0.018948	0.00491924	0.000927494	5.1018e-05	3.80132e-06	1.07675e-05
H9	0.00766154	0.00445426	0.000755982	9.53971e-05	0.471318	9.58283e-05	0.0291157	5.77774e-06	0.409668	4.76948e-06	9.07183e-06	0.00365212	0.00671038	0.00050215	1.67331e-05	1.87854e-05	0.0194654	0.00513841	0.00108772
H10	0.000765747	0.00123711	0.000490541	0.0304504	1.14422e-05	0.481149	7.36285e-06	0.00641811	4.76948e-06	0.413592	0.0167844	4.4477e-07	4.55448e-07	0.00630787	0.00377598	0.000466968	7.65147e-05	6.18746e-06	1.77974e-05
H11	0.00138559	0.000412611	0.000327174	0.029977	9.39746e-06	0.482695	5.60119e-06	0.00350531	9.07183e-06	0.0167844	0.406707	4.0441e-07	5.35863e-07	0.00636426	0.000439375	0.000728983	2.44576e-05	2.65453e-06	4.53676e-06
H12	0.000111537	0.00150884	3.95664e-05	1.86076e-05	0.0304753	1.22227e-05	0.48388	1.25424e-06	0.00365212	4.4477e-07	4.0441e-07	0.410873	0.0169297	3.63171e-05	2.16709e-06	4.61183e-06	0.00632459	0.00048665	0.000756075
H13	0.000293897	0.00100709	4.61205e-05	1.12107e-05	0.0306883	9.75423e-06	0.481533	7.34064e-07	0.00671038	4.55448e-07	5.35863e-07	0.0169297	0.41546	5.11885e-05	2.0727e-06	8.2061e-06	0.00638508	0.00434787	0.000445129
C14	0.465484	0.034403	0.0613534	0.516384	0.000455326	0.0378669	0.000224799	0.018948	0.00050215	0.00630787	0.00636426	3.63171e-05	5.11885e-05	4.06617	0.464195	0.462006	0.00555824	0.00112799	0.000482759
H15	0.0200151	0.00807476	0.00816798	0.0171565	6.52373e-05	0.00592688	1.23885e-05	0.00491924	1.67331e-05	0.00377598	0.000439375	2.16709e-06	2.0727e-06	0.464195	0.389464	0.014247	0.000370741	4.16491e-05	0.000112813
H16	0.0237905	0.00660139	0.00474658	0.0187105	4.18142e-05	0.0103844	3.85053e-05	0.000927494	1.87854e-05	0.000466968	0.000728983	4.61183e-06	8.2061e-06	0.462006	0.014247	0.388434	0.00110846	0.000352804	4.02284e-05
C17	0.0260117	0.533599	0.00525295	0.00170713	0.515588	0.000922231	0.0370352	5.1018e-05	0.0194654	7.65147e-05	2.44576e-05	0.00632459	0.00638508	0.00555824	0.000370741	0.00110846	4.01469	0.463796	0.459784
H18	0.00555867	0.0262254	0.000959018	6.89947e-05	0.0182306	7.09839e-05	0.00650819	3.80132e-06	0.00513841	6.18746e-06	2.65453e-06	0.00048665	0.00434787	0.00112799	4.16491e-05	0.000352804	0.463796	0.393652	0.0144581
H19	0.00656979	0.0286077	0.00616118	0.000126103	0.0188097	0.000114646	0.00920421	1.07675e-05	0.00108772	1.77974e-05	4.53676e-06	0.000756075	0.000445129	0.000482759	0.000112813	4.02284e-05	0.459784	0.0144581	0.380635
Total	14.7614	16.0948	9.22653	6.03613	6.03211	6.06989	6.07789	0.926062	0.959776	0.961564	0.949384	0.955113	0.963931	6.14792	0.937006	0.932658	6.09775	0.941036	0.927428	85.9984
LDM — alliciin_conf_21_LIDI_matrix
	S1	S2	O3	C4	C5	C6	C7	H8	H9	H10	H11	H12	H13	C14	H15	H16	C17	H18	H19
S1	12.9264	0.528417	0.700129	0.0282052	0.00641768	0.0168196	0.0028513	0.00253407	0.000473564	0.000758655	0.00139521	0.000286072	0.000143624	0.466018	0.0200177	0.0238514	0.0264727	0.00313874	0.00666063		64.1305	21.8694	86
S2	0.528417	14.7178	0.102793	0.0223319	0.0428537	0.0129417	0.0199215	0.00171744	0.00675058	0.00112951	0.000404251	0.00115174	0.00120439	0.0341706	0.0079904	0.00648668	0.531666	0.0296729	0.0276968
O3	0.700129	0.102793	8.30894	0.0112389	0.00132097	0.00308357	0.0010689	0.0101416	0.000125872	0.000492913	0.0003306	6.83207e-05	4.78212e-05	0.0614162	0.00818041	0.00469331	0.00548243	0.000528363	0.00677181
C4	0.0282052	0.0223319	0.0112389	3.97566	0.000110408	0.917477	0.000112296	0.466069	1.62824e-05	0.0305692	0.0300209	8.72106e-06	6.56898e-06	0.516521	0.0172486	0.0187291	0.00169751	0.000247275	0.000126684
C5	0.00641768	0.0428537	0.00132097	0.000110408	3.97493	0.000103861	0.922314	7.00245e-06	0.472388	8.90517e-06	4.23729e-06	0.0302995	0.0304451	0.00115935	5.20986e-05	0.000339885	0.51468	0.0184193	0.018913
C6	0.0168196	0.0129417	0.00308357	0.917477	0.000103861	4.07269	3.6768e-05	0.027339	1.50202e-05	0.481295	0.482732	3.30854e-06	3.40299e-06	0.0379207	0.00593842	0.0104661	0.000946612	0.000206739	0.00011263
C7	0.0028513	0.0199215	0.0010689	0.000112296	0.922314	3.6768e-05	4.08157	3.19322e-06	0.0289271	8.59401e-06	7.70102e-07	0.483538	0.481173	0.000650436	4.1292e-05	0.000277332	0.0375662	0.00647155	0.00926784
H8	0.00253407	0.00171744	0.0101416	0.466069	7.00245e-06	0.027339	3.19322e-06	0.383202	2.01577e-06	0.00641547	0.00350612	2.92271e-07	4.28159e-07	0.0189627	0.00491508	0.000905166	5.43998e-05	2.10883e-05	1.20696e-05
H9	0.000473564	0.00675058	0.000125872	1.62824e-05	0.472388	1.50202e-05	0.0289271	2.01577e-06	0.405342	9.73127e-07	8.1866e-07	0.00360895	0.00672827	3.23907e-05	7.03223e-06	1.06243e-05	0.0195909	0.00509516	0.00152158
H10	0.000758655	0.00112951	0.000492913	0.0305692	8.90517e-06	0.481295	8.59401e-06	0.00641547	9.73127e-07	0.414146	0.0168089	4.36363e-07	4.17187e-07	0.00631538	0.00376769	0.000466852	7.36817e-05	8.38231e-06	1.60311e-05
H11	0.00139521	0.000404251	0.0003306	0.0300209	4.23729e-06	0.482732	7.70102e-07	0.00350612	8.1866e-07	0.0168089	0.406987	1.04814e-07	1.11481e-07	0.00637017	0.000439963	0.000726817	2.67984e-05	8.41053e-06	4.71885e-06
H12	0.000286072	0.00115174	6.83207e-05	8.72106e-06	0.0302995	3.30854e-06	0.483538	2.92271e-07	0.00360895	4.36363e-07	1.04814e-07	0.409064	0.0168025	8.56665e-05	2.77949e-06	2.59453e-05	0.006388	0.00048064	0.000776634
H13	0.000143624	0.00120439	4.78212e-05	6.56898e-06	0.0304451	3.40299e-06	0.481173	4.28159e-07	0.00672827	4.17187e-07	1.11481e-07	0.0168025	0.412863	3.30664e-05	2.53036e-06	1.12267e-05	0.00638088	0.00422096	0.000526298
C14	0.466018	0.0341706	0.0614162	0.516521	0.00115935	0.0379207	0.000650436	0.0189627	3.23907e-05	0.00631538	0.00637017	8.56665e-05	3.30664e-05	4.06676	0.464327	0.461971	0.00539638	0.00027262	0.000505725
H15	0.0200177	0.0079904	0.00818041	0.0172486	5.20986e-05	0.00593842	4.1292e-05	0.00491508	7.03223e-06	0.00376769	0.000439963	2.77949e-06	2.53036e-06	0.464327	0.390082	0.0142947	0.00036913	4.04469e-05	0.000111099
H16	0.0238514	0.00648668	0.00469331	0.0187291	0.000339885	0.0104661	0.000277332	0.000905166	1.06243e-05	0.000466852	0.000726817	2.59453e-05	1.12267e-05	0.461971	0.0142947	0.388503	0.00104221	1.46575e-05	3.95892e-05
C17	0.0264727	0.531666	0.00548243	0.00169751	0.51468	0.000946612	0.0375662	5.43998e-05	0.0195909	7.36817e-05	2.67984e-05	0.006388	0.00638088	0.00539638	0.00036913	0.00104221	4.01282	0.466406	0.459512
H18	0.00313874	0.0296729	0.000528363	0.000247275	0.0184193	0.000206739	0.00647155	2.10883e-05	0.00509516	8.38231e-06	8.41053e-06	0.00048064	0.00422096	0.00027262	4.04469e-05	1.46575e-05	0.466406	0.401174	0.0147207
H19	0.00666063	0.0276968	0.00677181	0.000126684	0.018913	0.00011263	0.00926784	1.20696e-05	0.00152158	1.60311e-05	4.71885e-06	0.000776634	0.000526298	0.000505725	0.000111099	3.95892e-05	0.459512	0.0147207	0.381454
Total	14.761	16.0971	9.22686	6.0364	6.03477	6.07013	6.0758	0.925808	0.950636	0.962283	0.949767	0.952591	0.960594	6.14889	0.937829	0.932855	6.09657	0.951148	0.92875	85.9998
LDM — alliciin_conf_22_LIDI_matrix
	S1	S2	O3	C4	C5	C6	C7	H8	H9	H10	H11	H12	H13	C14	H15	H16	C17	H18	H19
S1	12.9177	0.531128	0.701438	0.0283146	0.00587333	0.017052	0.00287037	0.00248341	0.000263872	0.000770362	0.00138511	0.000285988	0.0001412	0.464841	0.0236454	0.0198348	0.0266355	0.0125637	0.00159603		64.1211	21.879	86
S2	0.531128	14.712	0.102673	0.0220562	0.0433593	0.0132833	0.0202616	0.00161073	0.00671496	0.00127892	0.000406397	0.00115529	0.00123843	0.0342982	0.0066539	0.00815604	0.531769	0.0279365	0.029457
O3	0.701438	0.102673	8.31154	0.0112957	0.00168165	0.00318516	0.00123927	0.00998322	0.000271928	0.000497428	0.000331039	7.27379e-05	6.74631e-05	0.0623725	0.00497054	0.00822668	0.0039369	0.0014635	0.00154944
C4	0.0283146	0.0220562	0.0112957	3.97665	0.000149617	0.916945	0.000174596	0.466247	9.21188e-06	0.0304944	0.029989	1.14299e-05	8.15724e-06	0.516659	0.018753	0.0172472	0.00178359	0.000279368	9.36443e-05
C5	0.00587333	0.0433593	0.00168165	0.000149617	3.97531	6.93072e-05	0.922059	1.08124e-05	0.473209	5.34344e-06	2.98046e-06	0.0303083	0.0302582	0.0010216	0.000251288	4.40378e-05	0.515	0.019041	0.0182963
C6	0.017052	0.0132833	0.00318516	0.916945	6.93072e-05	4.07293	7.12302e-05	0.0273789	4.11982e-06	0.481221	0.482761	4.89385e-06	4.18324e-06	0.0378572	0.0104132	0.00592935	0.00101256	0.00031027	5.71903e-05
C7	0.00287037	0.0202616	0.00123927	0.000174596	0.922059	7.12302e-05	4.08052	6.67662e-06	0.0292049	4.06693e-06	2.67165e-06	0.483532	0.480614	0.000559051	0.000208699	1.86438e-05	0.0374592	0.00931664	0.00639993
H8	0.00248341	0.00161073	0.00998322	0.466247	1.08124e-05	0.0273789	6.67662e-06	0.3834	1.54872e-06	0.00641896	0.00350131	4.27726e-07	4.71443e-07	0.0189449	0.000935545	0.00492765	5.47457e-05	1.83577e-05	1.11071e-05
H9	0.000263872	0.00671496	0.000271928	9.21188e-06	0.473209	4.11982e-06	0.0292049	1.54872e-06	0.410069	1.39984e-06	1.36593e-07	0.00363069	0.00674417	2.23746e-05	3.80837e-06	1.16252e-05	0.019783	0.00155589	0.00509613
H10	0.000770362	0.00127892	0.000497428	0.0304944	5.34344e-06	0.481221	4.06693e-06	0.00641896	1.39984e-06	0.414011	0.016801	3.0755e-07	3.86592e-07	0.00631491	0.000469734	0.00379038	7.61114e-05	1.17823e-05	1.99843e-05
H11	0.00138511	0.000406397	0.000331039	0.029989	2.98046e-06	0.482761	2.67165e-06	0.00350131	1.36593e-07	0.016801	0.406868	2.28324e-07	1.63004e-07	0.00637109	0.000732323	0.000439887	2.94676e-05	1.74075e-05	1.01361e-06
H12	0.000285988	0.00115529	7.27379e-05	1.14299e-05	0.0303083	4.89385e-06	0.483532	4.27726e-07	0.00363069	3.0755e-07	2.28324e-07	0.409221	0.0167074	8.71994e-05	2.16266e-05	2.03633e-06	0.00637536	0.00078326	0.000473444
H13	0.0001412	0.00123843	6.74631e-05	8.15724e-06	0.0302582	4.18324e-06	0.480614	4.71443e-07	0.00674417	3.86592e-07	1.63004e-07	0.0167074	0.409746	3.04969e-05	8.67351e-06	2.8672e-06	0.00636217	0.000522058	0.00413889
C14	0.464841	0.0342982	0.0623725	0.516659	0.0010216	0.0378572	0.000559051	0.0189449	2.23746e-05	0.00631491	0.00637109	8.71994e-05	3.04969e-05	4.06574	0.461947	0.464547	0.00548819	0.000735241	0.000273087
H15	0.0236454	0.0066539	0.00497054	0.018753	0.000251288	0.0104132	0.000208699	0.000935545	3.80837e-06	0.000469734	0.000732323	2.16266e-05	8.67351e-06	0.461947	0.38868	0.0142558	0.0010011	6.8963e-05	5.45632e-05
H16	0.0198348	0.00815604	0.00822668	0.0172472	4.40378e-05	0.00592935	1.86438e-05	0.00492765	1.16252e-05	0.00379038	0.000439887	2.03633e-06	2.8672e-06	0.464547	0.0142558	0.390807	0.000332223	2.4956e-05	0.000132977
C17	0.0266355	0.531769	0.0039369	0.00178359	0.515	0.00101256	0.0374592	5.47457e-05	0.019783	7.61114e-05	2.94676e-05	0.00637536	0.00636217	0.00548819	0.0010011	0.000332223	4.01044	0.461392	0.464876
H18	0.0125637	0.0279365	0.0014635	0.000279368	0.019041	0.00031027	0.00931664	1.83577e-05	0.00155589	1.17823e-05	1.74075e-05	0.00078326	0.000522058	0.000735241	6.8963e-05	2.4956e-05	0.461392	0.392731	0.0147554
H19	0.00159603	0.029457	0.00154944	9.36443e-05	0.0182963	5.71903e-05	0.00639993	1.11071e-05	0.00509613	1.99843e-05	1.01361e-06	0.000473444	0.00413889	0.000273087	5.45632e-05	0.000132977	0.464876	0.0147554	0.392774
Total	14.7589	16.0954	9.22679	6.03716	6.03595	6.07049	6.07452	0.925935	0.956598	0.962187	0.949641	0.952674	0.956595	6.14812	0.933076	0.938732	6.09381	0.943527	0.940056	86.0001
LDM — alliciin_conf_23_LIDI_matrix
	S1	S2	O3	C4	C5	C6	C7	H8	H9	H10	H11	H12	H13	C14	H15	H16	C17	H18	H19
S1	12.9101	0.529831	0.698613	0.0320858	0.00275034	0.0175591	0.000956203	0.00197907	0.00123554	0.000747851	0.00101291	0.00012	0.000143545	0.463774	0.025034	0.0196449	0.0260455	0.0048148	0.0117806		64.1461	21.853	86
S2	0.529831	14.7525	0.102959	0.00677925	0.0429476	0.0028356	0.0201652	0.000491836	0.00432139	0.000175028	0.000325925	0.00147938	0.00101199	0.0380858	0.0110146	0.00896411	0.534626	0.0263314	0.0293683
O3	0.698613	0.102959	8.30466	0.0113605	0.00654955	0.00332231	0.000773401	0.00726202	0.0117894	0.000411559	0.000211018	9.52626e-05	0.000298321	0.0617323	0.00548645	0.00805006	0.00386228	0.00106136	0.00157135
C4	0.0320858	0.00677925	0.0113605	3.98281	9.04389e-05	0.922389	0.000105496	0.468936	2.75028e-05	0.0305105	0.0300546	1.37585e-05	1.10721e-05	0.516418	0.0182183	0.017353	0.00134441	0.000251866	7.72613e-05
C5	0.00275034	0.0429476	0.00654955	9.04389e-05	3.97924	3.34414e-05	0.925161	1.2936e-05	0.464955	3.06258e-06	3.42467e-06	0.0303644	0.0309373	0.000347415	5.48856e-05	0.000163934	0.514127	0.0181406	0.0188293
C6	0.0175591	0.0028356	0.00332231	0.922389	3.34414e-05	4.07912	2.47156e-05	0.0281225	4.47966e-06	0.481393	0.482868	6.41229e-06	5.86405e-06	0.0385298	0.0093973	0.00628578	0.000528506	0.000176175	0.000107876
C7	0.000956203	0.0201652	0.000773401	0.000105496	0.925161	2.47156e-05	4.08563	8.0645e-06	0.0273155	2.77922e-06	5.14435e-06	0.483723	0.482094	0.000303607	4.3715e-05	0.000115514	0.0379733	0.0066376	0.00961251
H8	0.00197907	0.000491836	0.00726202	0.468936	1.2936e-05	0.0281225	8.0645e-06	0.390122	9.42297e-06	0.0065515	0.00354756	7.65091e-07	8.51863e-07	0.0189904	0.00128902	0.00488021	3.38191e-05	5.35412e-06	3.10724e-06
H9	0.00123554	0.00432139	0.0117894	2.75028e-05	0.464955	4.47966e-06	0.0273155	9.42297e-06	0.380943	6.98289e-07	4.14701e-07	0.00346479	0.00641333	0.00013773	1.13443e-05	2.60919e-05	0.0188746	0.00494889	0.000994664
H10	0.000747851	0.000175028	0.000411559	0.0305105	3.06258e-06	0.481393	2.77922e-06	0.0065515	6.98289e-07	0.413527	0.0167605	4.33452e-07	3.15228e-07	0.00640239	0.000468271	0.00396634	3.12839e-05	8.00547e-06	4.38914e-06
H11	0.00101291	0.000325925	0.000211018	0.0300546	3.42467e-06	0.482868	5.14435e-06	0.00354756	4.14701e-07	0.0167605	0.406109	7.6341e-07	6.54278e-07	0.00639927	0.000754719	0.000457454	8.78779e-05	2.15827e-05	5.81649e-06
H12	0.00012	0.00147938	9.52626e-05	1.37585e-05	0.0303644	6.41229e-06	0.483723	7.65091e-07	0.00346479	4.33452e-07	7.6341e-07	0.40986	0.0170246	3.82878e-05	2.64636e-06	1.10024e-05	0.00640635	0.000491632	0.000746186
H13	0.000143545	0.00101199	0.000298321	1.10721e-05	0.0309373	5.86405e-06	0.482094	8.51863e-07	0.00641333	3.15228e-07	6.54278e-07	0.0170246	0.418771	3.07195e-05	2.20811e-06	5.84906e-06	0.00655304	0.00449231	0.000451017
C14	0.463774	0.0380858	0.0617323	0.516418	0.000347415	0.0385298	0.000303607	0.0189904	0.00013773	0.00640239	0.00639927	3.82878e-05	3.07195e-05	4.06834	0.459499	0.464027	0.00573889	0.00101889	0.000759308
H15	0.025034	0.0110146	0.00548645	0.0182183	5.48856e-05	0.0093973	4.3715e-05	0.00128902	1.13443e-05	0.000468271	0.000754719	2.64636e-06	2.20811e-06	0.459499	0.377068	0.0140302	0.00076839	5.82239e-05	0.00023994
H16	0.0196449	0.00896411	0.00805006	0.017353	0.000163934	0.00628578	0.000115514	0.00488021	2.60919e-05	0.00396634	0.000457454	1.10024e-05	5.84906e-06	0.464027	0.0140302	0.389993	0.000498488	2.44198e-05	2.72279e-05
C17	0.0260455	0.534626	0.00386228	0.00134441	0.514127	0.000528506	0.0379733	3.38191e-05	0.0188746	3.12839e-05	8.78779e-05	0.00640635	0.00655304	0.00573889	0.00076839	0.000498488	4.01191	0.464572	0.460751
H18	0.0048148	0.0263314	0.00106136	0.000251866	0.0181406	0.000176175	0.0066376	5.35412e-06	0.00494889	8.00547e-06	2.15827e-05	0.000491632	0.00449231	0.00101889	5.82239e-05	2.44198e-05	0.464572	0.395332	0.0145833
H19	0.0117806	0.0293683	0.00157135	7.72613e-05	0.0188293	0.000107876	0.00961251	3.10724e-06	0.000994664	4.38914e-06	5.81649e-06	0.000746186	0.000451017	0.000759308	0.00023994	2.72279e-05	0.460751	0.0145833	0.390036
Total	14.7482	16.1142	9.23007	6.03884	6.03471	6.07271	6.08066	0.932247	0.925473	0.960965	0.948626	0.95385	0.968248	6.15058	0.923441	0.938525	6.09473	0.94297	0.939949	85.999
LDM — alliciin_conf_24_LIDI_matrix
	S1	S2	O3	C4	C5	C6	C7	H8	H9	H10	H11	H12	H13	C14	H15	H16	C17	H18	H19
S1	12.9053	0.529885	0.700117	0.0292581	0.0027537	0.0189787	0.000967391	0.00149472	0.00121419	0.000915492	0.00101494	0.000122212	0.000143658	0.46246	0.0246338	0.0228743	0.0261371	0.00477509	0.0119553		64.13	21.8698	86
S2	0.529885	14.7367	0.103637	0.0162704	0.0426833	0.00428051	0.0200725	0.012222	0.00426644	0.000199251	0.00041847	0.00146748	0.00101248	0.0339117	0.00995393	0.00616404	0.534113	0.0263745	0.0293843
O3	0.700117	0.103637	8.30858	0.00960291	0.00657457	0.00570948	0.000782439	0.000634875	0.0117351	0.000482943	0.000350489	9.2512e-05	0.000296778	0.0628164	0.00547748	0.00580256	0.00392724	0.00107451	0.00158844
C4	0.0292581	0.0162704	0.00960291	3.97895	0.000230775	0.919299	0.000160059	0.469842	3.34511e-05	0.0299162	0.0302401	1.55862e-05	8.44128e-06	0.51955	0.0174961	0.0175965	0.000780374	4.45234e-05	6.40512e-05
C5	0.0027537	0.0426833	0.00657457	0.000230775	3.97923	6.74301e-05	0.925092	0.000180719	0.465007	2.8955e-06	7.01946e-06	0.0303606	0.0309484	0.000304958	4.87208e-05	6.96642e-05	0.514173	0.0181645	0.0187937
C6	0.0189787	0.00428051	0.00570948	0.919299	6.74301e-05	4.07909	4.52207e-05	0.0284245	1.23906e-05	0.482971	0.480942	3.04536e-06	6.17765e-06	0.0383457	0.00778389	0.00684054	0.000224701	0.000116816	5.46224e-05
C7	0.000967391	0.0200725	0.000782439	0.000160059	0.925092	4.52207e-05	4.08575	0.000142673	0.0273171	2.21525e-06	7.90297e-06	0.483732	0.48209	0.000266455	2.96081e-05	8.79574e-05	0.0379732	0.00663375	0.00960406
H8	0.00149472	0.012222	0.000634875	0.469842	0.000180719	0.0284245	0.000142673	0.397882	8.20921e-06	0.00358519	0.00656653	1.2288e-05	5.29188e-06	0.0192736	0.00171405	0.0045349	0.000670997	1.55451e-05	4.08611e-05
H9	0.00121419	0.00426644	0.0117351	3.34511e-05	0.465007	1.23906e-05	0.0273171	8.20921e-06	0.38095	1.35308e-06	1.24002e-06	0.00346374	0.00641687	0.000140399	1.01815e-05	1.85862e-05	0.0188659	0.00495166	0.00100005
H10	0.000915492	0.000199251	0.000482943	0.0299162	2.8955e-06	0.482971	2.21525e-06	0.00358519	1.35308e-06	0.406034	0.016681	1.308e-07	2.93873e-07	0.00635651	0.000818122	0.00047282	1.9434e-05	6.53697e-06	2.4113e-06
H11	0.00101494	0.00041847	0.000350489	0.0302401	7.01946e-06	0.480942	7.90297e-06	0.00656653	1.24002e-06	0.016681	0.411551	5.91319e-07	4.74344e-07	0.00638232	0.000472905	0.00373473	4.5474e-05	6.13972e-06	3.94769e-06
H12	0.000122212	0.00146748	9.2512e-05	1.55862e-05	0.0303606	3.04536e-06	0.483732	1.2288e-05	0.00346374	1.308e-07	5.91319e-07	0.409875	0.0170286	3.75967e-05	2.18086e-06	1.18159e-05	0.0064071	0.0004921	0.000746483
H13	0.000143658	0.00101248	0.000296778	8.44128e-06	0.0309484	6.17765e-06	0.48209	5.29188e-06	0.00641687	2.93873e-07	4.74344e-07	0.0170286	0.418842	3.05269e-05	1.82655e-06	9.76174e-06	0.00656084	0.0045017	0.000451544
C14	0.46246	0.0339117	0.0628164	0.51955	0.000304958	0.0383457	0.000266455	0.0192736	0.000140399	0.00635651	0.00638232	3.75967e-05	3.05269e-05	4.06916	0.461414	0.461441	0.00579521	0.00105248	0.000791587
H15	0.0246338	0.00995393	0.00547748	0.0174961	4.87208e-05	0.00778389	2.96081e-05	0.00171405	1.01815e-05	0.000818122	0.000472905	2.18086e-06	1.82655e-06	0.461414	0.378295	0.0142212	0.000654868	5.64144e-05	0.000231859
H16	0.0228743	0.00616404	0.00580256	0.0175965	6.96642e-05	0.00684054	8.79574e-05	0.0045349	1.85862e-05	0.00047282	0.00373473	1.18159e-05	9.76174e-06	0.461441	0.0142212	0.386746	0.00124061	0.000273511	6.2615e-05
C17	0.0261371	0.534113	0.00392724	0.000780374	0.514173	0.000224701	0.0379732	0.000670997	0.0188659	1.9434e-05	4.5474e-05	0.0064071	0.00656084	0.00579521	0.000654868	0.00124061	4.01208	0.464711	0.460566
H18	0.00477509	0.0263745	0.00107451	4.45234e-05	0.0181645	0.000116816	0.00663375	1.55451e-05	0.00495166	6.53697e-06	6.13972e-06	0.0004921	0.0045017	0.00105248	5.64144e-05	0.000273511	0.464711	0.395471	0.0145626
H19	0.0119553	0.0293843	0.00158844	6.40512e-05	0.0187937	5.46224e-05	0.00960406	4.08611e-05	0.00100005	2.4113e-06	3.94769e-06	0.000746483	0.000451544	0.000791587	0.000231859	6.2615e-05	0.460566	0.0145626	0.389456
Total	14.745	16.113	9.22929	6.03936	6.03469	6.07319	6.08076	0.947251	0.925413	0.948468	0.958427	0.953872	0.968355	6.14953	0.923315	0.932203	6.09494	0.943285	0.939361	85.9998
LDM — alliciin_conf_25_LIDI_matrix
	S1	S2	O3	C4	C5	C6	C7	H8	H9	H10	H11	H12	H13	C14	H15	H16	C17	H18	H19
S1	12.8916	0.523801	0.702348	0.0293126	0.0121902	0.0188586	0.00812717	0.00151228	0.000601346	0.000992482	0.000915377	0.000253176	0.00107496	0.461091	0.0244523	0.0223965	0.0238827	0.00399044	0.00554275		64.1226	21.8759	86
S2	0.523801	14.7438	0.103482	0.0164275	0.0386413	0.003887	0.0205131	0.013846	0.00741095	0.000404892	0.000175872	0.00153537	0.00131744	0.0350363	0.00924779	0.00649717	0.535608	0.0299448	0.0273639
O3	0.702348	0.103482	8.30804	0.00965496	0.00728786	0.00577404	0.00446544	0.000663449	0.00101763	0.000363822	0.000493735	0.00019741	0.000199972	0.0640943	0.00524562	0.00642292	0.00353531	0.000590035	0.00149848
C4	0.0293126	0.0164275	0.00965496	3.97873	0.00019054	0.919805	0.000106015	0.469486	2.4524e-05	0.0302456	0.0300094	7.74834e-06	8.98561e-06	0.519225	0.0177211	0.0176049	0.000494194	0.000102097	4.90986e-05
C5	0.0121902	0.0386413	0.00728786	0.00019054	3.97078	9.7879e-05	0.916745	0.00017947	0.47104	8.26021e-06	3.9848e-06	0.0299357	0.0304637	0.000949692	0.000142562	9.06645e-05	0.515192	0.0183913	0.0190323
C6	0.0188586	0.003887	0.00577404	0.919805	9.7879e-05	4.08175	4.08741e-05	0.0284288	5.94454e-06	0.481146	0.483332	2.15228e-06	1.112e-05	0.0383045	0.0078497	0.00674192	0.000270595	8.06214e-05	9.4878e-05
C7	0.00812717	0.0205131	0.00446544	0.000106015	0.916745	4.08741e-05	4.07669	0.00012126	0.028189	7.68743e-06	2.87766e-06	0.482843	0.481034	0.000431198	0.000176785	5.6089e-05	0.0373557	0.00659035	0.0102652
H8	0.00151228	0.013846	0.000663449	0.469486	0.00017947	0.0284288	0.00012126	0.396378	1.61111e-05	0.00656779	0.00359225	9.71656e-06	5.58411e-06	0.0191089	0.00171096	0.00454255	0.000433707	4.87063e-05	1.44855e-05
H9	0.000601346	0.00741095	0.00101763	2.4524e-05	0.47104	5.94454e-06	0.028189	1.61111e-05	0.401569	7.37744e-07	2.36777e-07	0.00356671	0.00669108	5.19141e-05	8.70829e-06	6.81754e-06	0.0195479	0.00516657	0.00113547
H10	0.000992482	0.000404892	0.000363822	0.0302456	8.26021e-06	0.481146	7.68743e-06	0.00656779	7.37744e-07	0.412237	0.0167708	5.03352e-07	7.48028e-07	0.00637748	0.000476704	0.00373524	3.65791e-05	4.18319e-06	5.27369e-06
H11	0.000915377	0.000175872	0.000493735	0.0300094	3.9848e-06	0.483332	2.87766e-06	0.00359225	2.36777e-07	0.0167708	0.407731	1.55412e-07	4.6324e-07	0.00636635	0.000828969	0.000469824	2.38405e-05	3.02295e-06	5.57214e-06
H12	0.000253176	0.00153537	0.00019741	7.74834e-06	0.0299357	2.15228e-06	0.482843	9.71656e-06	0.00356671	5.03352e-07	1.55412e-07	0.406379	0.0167486	1.78345e-05	9.697e-06	2.47847e-06	0.00631646	0.000484263	0.000769277
H13	0.00107496	0.00131744	0.000199972	8.98561e-06	0.0304637	1.112e-05	0.481034	5.58411e-06	0.00669108	7.48028e-07	4.6324e-07	0.0167486	0.414565	6.8893e-05	1.93197e-05	3.10683e-06	0.00646454	0.00449912	0.000509958
C14	0.461091	0.0350363	0.0640943	0.519225	0.000949692	0.0383045	0.000431198	0.0191089	5.19141e-05	0.00637748	0.00636635	1.78345e-05	6.8893e-05	4.06301	0.462506	0.461389	0.00535062	0.000327374	0.00102294
H15	0.0244523	0.00924779	0.00524562	0.0177211	0.000142562	0.0078497	0.000176785	0.00171096	8.70829e-06	0.000476704	0.000828969	9.697e-06	1.93197e-05	0.462506	0.383539	0.0144021	0.000751857	0.00010982	4.53324e-05
H16	0.0223965	0.00649717	0.00642292	0.0176049	9.06645e-05	0.00674192	5.6089e-05	0.00454255	6.81754e-06	0.00373524	0.000469824	2.47847e-06	3.10683e-06	0.461389	0.0144021	0.387357	0.00111893	4.02341e-05	0.0002925
C17	0.0238827	0.535608	0.00353531	0.000494194	0.515192	0.000270595	0.0373557	0.000433707	0.0195479	3.65791e-05	2.38405e-05	0.00631646	0.00646454	0.00535062	0.000751857	0.00111893	4.0084	0.464518	0.463122
H18	0.00399044	0.0299448	0.000590035	0.000102097	0.0183913	8.06214e-05	0.00659035	4.87063e-05	0.00516657	4.18319e-06	3.02295e-06	0.000484263	0.00449912	0.000327374	0.00010982	4.02341e-05	0.464518	0.3974	0.0147904
H19	0.00554275	0.0273639	0.00149848	4.90986e-05	0.0190323	9.4878e-05	0.0102652	1.44855e-05	0.00113547	5.27369e-06	5.57214e-06	0.000769277	0.000509958	0.00102294	4.53324e-05	0.0002925	0.463122	0.0147904	0.392636
Total	14.7329	16.119	9.22537	6.0392	6.03137	6.07648	6.07376	0.946667	0.94605	0.959382	0.950726	0.949079	0.963687	6.14473	0.929244	0.93317	6.09243	0.947082	0.938196	85.9986
LDM — alliciin_conf_26_LIDI_matrix
	S1	S2	O3	C4	C5	C6	C7	H8	H9	H10	H11	H12	H13	C14	H15	H16	C17	H18	H19
S1	12.8987	0.524075	0.700516	0.0312809	0.0116256	0.0173654	0.00739095	0.00198854	0.00059797	0.000745824	0.00102281	0.000959512	0.000238142	0.462262	0.0194828	0.0248393	0.0237775	0.00392094	0.00557285		64.1386	21.8615	86
S2	0.524075	14.7595	0.102901	0.00707964	0.0384824	0.00283791	0.0202518	0.000511185	0.00746407	0.000187252	0.000334017	0.0013082	0.00154199	0.0396225	0.00986485	0.0108681	0.536322	0.0300166	0.0274018
O3	0.700516	0.102901	8.3024	0.012604	0.0081199	0.00356419	0.00497015	0.00826873	0.00115019	0.000441403	0.000228435	0.000205815	0.00021732	0.0626084	0.00809498	0.00526329	0.00338206	0.000566109	0.00142424
C4	0.0312809	0.00707964	0.012604	3.98264	0.000120805	0.922388	7.99135e-05	0.468348	1.06908e-05	0.0306014	0.030115	5.58752e-06	4.06306e-06	0.516437	0.0173396	0.018515	0.00118526	4.58521e-05	0.000275411
C5	0.0116256	0.0384824	0.0081199	0.000120805	3.97068	8.85346e-05	0.917003	1.45347e-05	0.47093	4.29095e-06	6.53503e-06	0.0305398	0.0299416	0.000915921	0.000149192	0.000144481	0.515138	0.0184599	0.0190234
C6	0.0173654	0.00283791	0.00356419	0.922388	8.85346e-05	4.08068	2.54065e-05	0.0280107	4.59055e-06	0.481615	0.48312	4.33104e-06	6.30726e-07	0.0384986	0.00624226	0.00958919	0.000443885	4.79047e-05	0.000191393
C7	0.00739095	0.0202518	0.00497015	7.99135e-05	0.917003	2.54065e-05	4.07615	1.15452e-05	0.0281518	3.17592e-06	4.33488e-06	0.481122	0.482785	0.0004412	8.66086e-05	0.000189217	0.0374492	0.00664546	0.0103901
H8	0.00198854	0.000511185	0.00826873	0.468348	1.45347e-05	0.0280107	1.15452e-05	0.388729	1.67169e-06	0.00654732	0.00354773	6.29506e-07	5.843e-07	0.0188612	0.00488648	0.00125926	2.64033e-05	3.23592e-06	7.28298e-06
H9	0.00059797	0.00746407	0.00115019	1.06908e-05	0.47093	4.59055e-06	0.0281518	1.67169e-06	0.401316	3.87238e-07	3.08561e-07	0.00669076	0.00356734	5.27677e-05	1.31904e-05	9.87513e-06	0.0195618	0.00517265	0.00110668
H10	0.000745824	0.000187252	0.000441403	0.0306014	4.29095e-06	0.481615	3.17592e-06	0.00654732	3.87238e-07	0.414773	0.0168421	2.67246e-07	1.27659e-07	0.00642188	0.00399229	0.000473668	2.71044e-05	2.53835e-06	9.09674e-06
H11	0.00102281	0.000334017	0.000228435	0.030115	6.53503e-06	0.48312	4.33488e-06	0.00354773	3.08561e-07	0.0168421	0.407201	3.32562e-07	1.95713e-07	0.00639495	0.000454705	0.000763236	8.60012e-05	3.14994e-06	2.27189e-05
H12	0.000959512	0.0013082	0.000205815	5.58752e-06	0.0305398	4.33104e-06	0.481122	6.29506e-07	0.00669076	2.67246e-07	3.32562e-07	0.414981	0.0167521	6.30586e-05	4.9291e-06	1.80059e-05	0.00648864	0.00453426	0.000512408
H13	0.000238142	0.00154199	0.00021732	4.06306e-06	0.0299416	6.30726e-07	0.482785	5.843e-07	0.00356734	1.27659e-07	1.95713e-07	0.0167521	0.406246	2.11571e-05	6.81337e-06	1.07774e-05	0.00632396	0.000488863	0.000766529
C14	0.462262	0.0396225	0.0626084	0.516437	0.000915921	0.0384986	0.0004412	0.0188612	5.27677e-05	0.00642188	0.00639495	6.30586e-05	2.11571e-05	4.06173	0.464177	0.460293	0.00541275	0.000329656	0.000993533
H15	0.0194828	0.00986485	0.00809498	0.0173396	0.000149192	0.00624226	8.66086e-05	0.00488648	1.31904e-05	0.00399229	0.000454705	4.9291e-06	6.81337e-06	0.464177	0.390853	0.0141654	0.000325312	4.39514e-05	2.16371e-05
H16	0.0248393	0.0108681	0.00526329	0.018515	0.000144481	0.00958919	0.000189217	0.00125926	9.87513e-06	0.000473668	0.000763236	1.80059e-05	1.07774e-05	0.460293	0.0141654	0.38213	0.000895046	0.000118413	4.62876e-05
C17	0.0237775	0.536322	0.00338206	0.00118526	0.515138	0.000443885	0.0374492	2.64033e-05	0.0195618	2.71044e-05	8.60012e-05	0.00648864	0.00632396	0.00541275	0.000325312	0.000895046	4.00906	0.46475	0.462884
H18	0.00392094	0.0300166	0.000566109	4.58521e-05	0.0184599	4.79047e-05	0.00664546	3.23592e-06	0.00517265	2.53835e-06	3.14994e-06	0.00453426	0.000488863	0.000329656	4.39514e-05	0.000118413	0.46475	0.398495	0.0148143
H19	0.00557285	0.0274018	0.00142424	0.000275411	0.0190234	0.000191393	0.0103901	7.28298e-06	0.00110668	9.09674e-06	2.27189e-05	0.000512408	0.000766529	0.000993533	2.16371e-05	4.62876e-05	0.462884	0.0148143	0.392262
Total	14.7364	16.1206	9.22693	6.03908	6.03139	6.07472	6.07315	0.931024	0.945802	0.962688	0.950148	0.964191	0.948914	6.14554	0.940205	0.929592	6.09354	0.948458	0.937725	86
LDM — alliciin_conf_27_LIDI_matrix
	S1	S2	O3	C4	C5	C6	C7	H8	H9	H10	H11	H12	H13	C14	H15	H16	C17	H18	H19
S1	12.9507	0.523058	0.69356	0.0289515	0.00639098	0.0171804	0.00338502	0.00308243	0.0004807	0.00085726	0.000926159	0.000264578	0.000262722	0.460642	0.0220737	0.0237311	0.0252392	0.00681755	0.00172855		64.1364	21.8628	86
S2	0.523058	14.737	0.0980154	0.0137219	0.0413193	0.0148467	0.0204148	0.000491199	0.0037766	0.00446738	0.000356872	0.00131935	0.00111792	0.0365755	0.00771548	0.0056843	0.53367	0.0248695	0.0309603
O3	0.69356	0.0980154	8.28842	0.00917554	0.0017659	0.00566711	0.00102641	0.000553681	0.000723878	0.000335111	0.000552089	7.3393e-05	0.000479726	0.0631573	0.0070865	0.0045904	0.0174658	0.0283463	0.000809682
C4	0.0289515	0.0137219	0.00917554	3.97826	0.000129596	0.916967	6.64133e-05	0.474563	8.04475e-06	0.0296263	0.0299201	7.81488e-06	4.99597e-06	0.521147	0.0184662	0.017368	0.000555485	0.000129717	0.000251964
C5	0.00639098	0.0413193	0.0017659	0.000129596	3.97065	7.15429e-05	0.923271	2.51744e-05	0.475085	5.57778e-05	2.81507e-06	0.0304878	0.0299737	0.000673299	0.000120994	0.000729912	0.51429	0.0159915	0.0198124
C6	0.0171804	0.0148467	0.00566711	0.916967	7.15429e-05	4.06655	4.41439e-05	0.0296763	7.03992e-06	0.478884	0.482688	4.47705e-06	3.4039e-06	0.037606	0.00830107	0.00599295	0.000526821	7.06758e-05	0.000491454
C7	0.00338502	0.0204148	0.00102641	6.64133e-05	0.923271	4.41439e-05	4.07595	1.03309e-05	0.0299172	4.08983e-05	1.17544e-06	0.483672	0.479497	0.000225663	9.7984e-05	0.000203154	0.0372242	0.00623604	0.0084313
H8	0.00308243	0.000491199	0.000553681	0.474563	2.51744e-05	0.0296763	1.03309e-05	0.411364	1.14187e-06	0.00672554	0.00368638	1.41585e-06	8.42411e-07	0.0200383	0.00180251	0.0047443	0.000124915	3.40085e-05	0.000124505
H9	0.0004807	0.0037766	0.000723878	8.04475e-06	0.475085	7.03992e-06	0.0299172	1.14187e-06	0.416709	2.84658e-06	2.33991e-07	0.00366366	0.00672848	4.14475e-05	1.07989e-05	4.6113e-05	0.0201792	0.00444535	0.00151678
H10	0.00085726	0.00446738	0.000335111	0.0296263	5.57778e-05	0.478884	4.08983e-05	0.00672554	2.84658e-06	0.408392	0.0165283	5.02536e-06	1.87548e-06	0.00605419	0.000479996	0.00332901	0.000514998	3.13122e-05	0.000712578
H11	0.000926159	0.000356872	0.000552089	0.0299201	2.81507e-06	0.482688	1.17544e-06	0.00368638	2.33991e-07	0.0165283	0.40626	2.53413e-07	1.91411e-07	0.00628022	0.000772033	0.000410976	2.46069e-05	2.16719e-06	5.5783e-05
H12	0.000264578	0.00131935	7.3393e-05	7.81488e-06	0.0304878	4.47705e-06	0.483672	1.41585e-06	0.00366366	5.02536e-06	2.53413e-07	0.411033	0.0166122	2.63343e-05	5.23128e-06	3.64845e-05	0.00633945	0.000469807	0.000809193
H13	0.000262722	0.00111792	0.000479726	4.99597e-06	0.0299737	3.4039e-06	0.479497	8.42411e-07	0.00672848	1.87548e-06	1.91411e-07	0.0166122	0.40493	2.17971e-05	3.84465e-06	1.46942e-05	0.00630268	0.00385368	0.000476224
C14	0.460642	0.0365755	0.0631573	0.521147	0.000673299	0.037606	0.000225663	0.0200383	4.14475e-05	0.00605419	0.00628022	2.63343e-05	2.17971e-05	4.0578	0.461889	0.459602	0.00414426	0.000740828	0.00242417
H15	0.0220737	0.00771548	0.0070865	0.0184662	0.000120994	0.00830107	9.7984e-05	0.00180251	1.07989e-05	0.000479996	0.000772033	5.23128e-06	3.84465e-06	0.461889	0.386296	0.0142679	0.000297741	4.26473e-05	0.000175443
H16	0.0237311	0.0056843	0.0045904	0.017368	0.000729912	0.00599295	0.000203154	0.0047443	4.6113e-05	0.00332901	0.000410976	3.64845e-05	1.46942e-05	0.459602	0.0142679	0.386205	0.00561723	0.00114877	0.00429962
C17	0.0252392	0.53367	0.0174658	0.000555485	0.51429	0.000526821	0.0372242	0.000124915	0.0201792	0.000514998	2.46069e-05	0.00633945	0.00630268	0.00414426	0.000297741	0.00561723	4.02735	0.44219	0.467144
H18	0.00681755	0.0248695	0.0283463	0.000129717	0.0159915	7.06758e-05	0.00623604	3.40085e-05	0.00444535	3.13122e-05	2.16719e-06	0.000469807	0.00385368	0.000740828	4.26473e-05	0.00114877	0.44219	0.344331	0.0138855
H19	0.00172855	0.0309603	0.000809682	0.000251964	0.0198124	0.000491454	0.0084313	0.000124505	0.00151678	0.000712578	5.5783e-05	0.000809193	0.000476224	0.00242417	0.000175443	0.00429962	0.467144	0.0138855	0.408283
Total	14.7693	16.0994	9.2218	6.03932	6.03085	6.06558	6.06971	0.95705	0.963343	0.957045	0.948469	0.954832	0.950286	6.13909	0.929905	0.938021	6.1092	0.893636	0.962393	85.9992
LDM — alliciin_conf_28_LIDI_matrix
	S1	S2	O3	C4	C5	C6	C7	H8	H9	H10	H11	H12	H13	C14	H15	H16	C17	H18	H19
S1	12.9472	0.518274	0.694813	0.0310223	0.00620366	0.0191085	0.00330832	0.00227287	0.0004778	0.000970304	0.000914813	0.000253016	0.000260744	0.460408	0.0244752	0.0204436	0.0247451	0.00687371	0.00168681		64.1522	21.8471	86
S2	0.518274	14.7705	0.0978314	0.00841869	0.0414879	0.00458842	0.0206309	0.000382869	0.00371104	0.000442753	0.000314992	0.00133215	0.00113497	0.0393832	0.00456997	0.0106784	0.534216	0.0251817	0.0311281
O3	0.694813	0.0978314	8.27515	0.0123073	0.00170744	0.0112981	0.00101363	0.000456557	0.000703071	0.000423545	0.00265444	7.17246e-05	0.000477465	0.0622554	0.00612122	0.00805285	0.0170661	0.0280251	0.000796225
C4	0.0310223	0.00841869	0.0123073	3.98145	0.000145987	0.91631	0.000120852	0.475437	1.28481e-05	0.0299977	0.0293722	6.96067e-06	5.96726e-06	0.518484	0.0178114	0.0178613	0.00045084	9.1613e-05	0.000249293
C5	0.00620366	0.0414879	0.00170744	0.000145987	3.97059	0.000124287	0.923171	2.50545e-05	0.475055	9.57922e-06	7.84065e-06	0.0304663	0.0299546	0.000665657	0.000692407	9.07979e-05	0.514405	0.016003	0.0197036
C6	0.0191085	0.00458842	0.0112981	0.91631	0.000124287	4.06594	3.45081e-05	0.029771	1.01078e-05	0.482915	0.478397	4.23567e-06	2.54272e-06	0.037384	0.006728	0.00715072	0.000183032	5.86277e-05	7.52087e-05
C7	0.00330832	0.0206309	0.00101363	0.000120852	0.923171	3.45081e-05	4.07614	1.01258e-05	0.029895	5.83506e-06	3.00161e-06	0.483657	0.479529	0.000219602	0.000184438	4.95834e-05	0.037302	0.00627055	0.00839361
H8	0.00227287	0.000382869	0.000456557	0.475437	2.50545e-05	0.029771	1.01258e-05	0.413226	1.84592e-06	0.00367671	0.00670161	1.41642e-06	8.102e-07	0.0201096	0.00438616	0.00211429	0.000128218	3.64101e-05	8.466e-05
H9	0.0004778	0.00371104	0.000703071	1.28481e-05	0.475055	1.01078e-05	0.029895	1.84592e-06	0.416354	6.86337e-07	1.33954e-06	0.00365976	0.00672793	4.30102e-05	4.98361e-05	5.34261e-06	0.0201331	0.00445295	0.00151134
H10	0.000970304	0.000442753	0.000423545	0.0299977	9.57922e-06	0.482915	5.83506e-06	0.00367671	6.86337e-07	0.407398	0.0164211	3.83124e-07	2.52916e-07	0.00630572	0.000445007	0.000803606	1.22725e-05	3.79114e-06	5.73657e-06
H11	0.000914813	0.000314992	0.00265444	0.0293722	7.84065e-06	0.478397	3.00161e-06	0.00670161	1.33954e-06	0.0164211	0.402769	2.94686e-07	4.12033e-07	0.00605228	0.00337472	0.000440258	2.76732e-05	3.42814e-05	1.64615e-05
H12	0.000253016	0.00133215	7.17246e-05	6.96067e-06	0.0304663	4.23567e-06	0.483657	1.41642e-06	0.00365976	3.83124e-07	2.94686e-07	0.410904	0.0166163	2.63528e-05	3.2646e-05	4.61441e-06	0.00634184	0.000471439	0.000809388
H13	0.000260744	0.00113497	0.000477465	5.96726e-06	0.0299546	2.54272e-06	0.479529	8.102e-07	0.00672793	2.52916e-07	4.12033e-07	0.0166163	0.405144	2.14373e-05	1.44572e-05	3.08422e-06	0.00630762	0.00387961	0.000474579
C14	0.460408	0.0393832	0.0622554	0.518484	0.000665657	0.037384	0.000219602	0.0201096	4.30102e-05	0.00630572	0.00605228	2.63528e-05	2.14373e-05	4.05683	0.458192	0.465411	0.00432475	0.000846898	0.00234306
H15	0.0244752	0.00456997	0.00612122	0.0178114	0.000692407	0.006728	0.000184438	0.00438616	4.98361e-05	0.000445007	0.00337472	3.2646e-05	1.44572e-05	0.458192	0.383804	0.0142595	0.00554674	0.00139979	0.00390358
H16	0.0204436	0.0106784	0.00805285	0.0178613	9.07979e-05	0.00715072	4.95834e-05	0.00211429	5.34261e-06	0.000803606	0.000440258	4.61441e-06	3.08422e-06	0.465411	0.0142595	0.390843	0.000388685	0.000103647	0.000129358
C17	0.0247451	0.534216	0.0170661	0.00045084	0.514405	0.000183032	0.037302	0.000128218	0.0201331	1.22725e-05	2.76732e-05	0.00634184	0.00630762	0.00432475	0.00554674	0.000388685	4.02679	0.442402	0.467317
H18	0.00687371	0.0251817	0.0280251	9.1613e-05	0.016003	5.86277e-05	0.00627055	3.64101e-05	0.00445295	3.79114e-06	3.42814e-05	0.000471439	0.00387961	0.000846898	0.00139979	0.000103647	0.442402	0.345577	0.0138449
H19	0.00168681	0.0311281	0.000796225	0.000249293	0.0197036	7.52087e-05	0.00839361	8.466e-05	0.00151134	5.73657e-06	1.64615e-05	0.000809388	0.000474579	0.00234306	0.00390358	0.000129358	0.467317	0.0138449	0.405632
Total	14.7637	16.1142	9.22123	6.03956	6.03051	6.06008	6.06993	0.958823	0.962806	0.949837	0.947503	0.95466	0.950556	6.1393	0.935991	0.938834	6.10808	0.895558	0.958105	85.9993
LDM — alliciin_conf_29_LIDI_matrix
	S1	S2	O3	C4	C5	C6	C7	H8	H9	H10	H11	H12	H13	C14	H15	H16	C17	H18	H19
S1	12.9042	0.525945	0.702101	0.0297953	0.00542197	0.0190747	0.00096306	0.00151597	0.00678124	0.000915648	0.00102753	0.000105041	0.000274851	0.462716	0.022797	0.0245939	0.0248559	0.00559549	0.00629589		64.1343	21.8661	86
S2	0.525945	14.7364	0.104866	0.016134	0.0434416	0.00435838	0.0209321	0.0124143	0.00474176	0.000203801	0.000415747	0.0015197	0.00100733	0.0343382	0.00611395	0.0101456	0.53435	0.0262849	0.0284185
O3	0.702101	0.104866	8.31153	0.00955286	0.000815188	0.00566828	0.000354559	0.00063562	0.000641255	0.000475472	0.000359228	4.03043e-05	4.32814e-05	0.0622692	0.0057028	0.00521059	0.00615588	0.00100421	0.00778389
C4	0.0297953	0.016134	0.00955286	3.97919	0.000119576	0.919285	3.27137e-05	0.46969	7.46099e-05	0.0299037	0.0302498	3.64343e-06	4.74798e-06	0.519436	0.0175893	0.0175105	0.000789043	9.34988e-05	0.00016475
C5	0.00542197	0.0434416	0.000815188	0.000119576	3.97167	7.44362e-05	0.924542	7.19396e-05	0.471246	3.7387e-06	5.26778e-06	0.0304558	0.030705	0.000501323	4.91041e-05	0.000167125	0.515506	0.0181178	0.0186179
C6	0.0190747	0.00435838	0.00566828	0.919285	7.44362e-05	4.07949	1.58122e-05	0.0283612	9.49818e-05	0.482961	0.480992	5.50992e-06	5.47463e-06	0.038446	0.00684376	0.00774575	0.000214487	3.34608e-05	0.000121823
C7	0.00096306	0.0209321	0.000354559	3.27137e-05	0.924542	1.58122e-05	4.0828	3.47274e-05	0.0289855	2.89552e-06	3.789e-06	0.483794	0.481546	0.000302265	5.96452e-05	0.000116909	0.0371237	0.0064701	0.00923117
H8	0.00151597	0.0124143	0.00063562	0.46969	7.19396e-05	0.0283612	3.47274e-05	0.396606	9.78338e-06	0.00357816	0.00655912	2.1175e-06	1.8385e-06	0.0192388	0.00452152	0.00171617	0.00069634	3.78929e-05	0.000165038
H9	0.00678124	0.00474176	0.000641255	7.46099e-05	0.471246	9.49818e-05	0.0289855	9.78338e-06	0.408236	3.17401e-06	3.60439e-06	0.00364221	0.00670415	0.000527971	2.1709e-05	0.000100977	0.0195014	0.00512491	0.00104251
H10	0.000915648	0.000203801	0.000475472	0.0299037	3.7387e-06	0.482961	2.89552e-06	0.00357816	3.17401e-06	0.405892	0.0166858	4.12573e-07	3.08919e-07	0.00636347	0.000473421	0.000820613	1.89816e-05	2.11326e-06	5.03719e-06
H11	0.00102753	0.000415747	0.000359228	0.0302498	5.26778e-06	0.480992	3.789e-06	0.00655912	3.60439e-06	0.0166858	0.41176	4.74473e-07	4.08474e-07	0.0063771	0.00373158	0.000472643	4.55191e-05	4.14402e-06	7.06306e-06
H12	0.000105041	0.0015197	4.03043e-05	3.64343e-06	0.0304558	5.50992e-06	0.483794	2.1175e-06	0.00364221	4.12573e-07	4.74473e-07	0.410455	0.0169209	4.15977e-05	7.76709e-06	9.764e-06	0.00633064	0.000483969	0.000745348
H13	0.000274851	0.00100733	4.32814e-05	4.74798e-06	0.030705	5.47463e-06	0.481546	1.8385e-06	0.00670415	3.08919e-07	4.08474e-07	0.0169209	0.415601	5.20017e-05	8.47169e-06	6.34264e-06	0.00640677	0.00432611	0.000440559
C14	0.462716	0.0343382	0.0622692	0.519436	0.000501323	0.038446	0.000302265	0.0192388	0.000527971	0.00636347	0.0063771	4.15977e-05	5.20017e-05	4.06854	0.461549	0.461631	0.00560506	0.0010413	0.00044406
H15	0.022797	0.00611395	0.0057028	0.0175893	4.91041e-05	0.00684376	5.96452e-05	0.00452152	2.1709e-05	0.000473421	0.00373158	7.76709e-06	8.47169e-06	0.461549	0.386851	0.0142313	0.0012553	0.000325351	4.80728e-05
H16	0.0245939	0.0101456	0.00521059	0.0175105	0.000167125	0.00774575	0.000116909	0.00171617	0.000100977	0.000820613	0.000472643	9.764e-06	6.34264e-06	0.461631	0.0142313	0.379477	0.000640033	3.73283e-05	5.68708e-05
C17	0.0248559	0.53435	0.00615588	0.000789043	0.515506	0.000214487	0.0371237	0.00069634	0.0195014	1.89816e-05	4.55191e-05	0.00633064	0.00640677	0.00560506	0.0012553	0.000640033	4.01637	0.463911	0.458294
H18	0.00559549	0.0262849	0.00100421	9.34988e-05	0.0181178	3.34608e-05	0.0064701	3.78929e-05	0.00512491	2.11326e-06	4.14402e-06	0.000483969	0.00432611	0.0010413	0.000325351	3.73283e-05	0.463911	0.392706	0.0143
H19	0.00629589	0.0284185	0.00778389	0.00016475	0.0186179	0.000121823	0.00923117	0.000165038	0.00104251	5.03719e-06	7.06306e-06	0.000745348	0.000440559	0.00044406	4.80728e-05	5.68708e-05	0.458294	0.0143	0.376583
Total	14.7449	16.1121	9.22521	6.03962	6.03154	6.07379	6.07731	0.945857	0.957484	0.94831	0.9587	0.954564	0.964055	6.14942	0.93218	0.924691	6.09807	0.9399	0.922765	86.0005
LDM — alliciin_conf_30_LIDI_matrix
	S1	S2	O3	C4	C5	C6	C7	H8	H9	H10	H11	H12	H13	C14	H15	H16	C17	H18	H19
S1	12.9122	0.523225	0.699866	0.0324156	0.00520794	0.0177393	0.000920964	0.00195523	0.00643958	0.000757742	0.00100574	0.000100672	0.000271304	0.464226	0.0250418	0.0197865	0.0243198	0.00563761	0.0059902		64.1561	21.8419	86
S2	0.523225	14.7576	0.103597	0.00676248	0.0434609	0.00285923	0.021047	0.000472248	0.00460568	0.000175889	0.000325325	0.00151882	0.00101463	0.0383864	0.0111262	0.00910825	0.535283	0.0264783	0.0284531
O3	0.699866	0.103597	8.30606	0.0105298	0.000795181	0.00320701	0.000348919	0.00645759	0.000557679	0.000396281	0.000203099	3.79256e-05	4.14805e-05	0.0612367	0.00563678	0.00805495	0.00748899	0.00106286	0.0102578
C4	0.0324156	0.00676248	0.0105298	3.98288	6.40784e-05	0.922367	7.6868e-05	0.469525	3.11378e-05	0.030488	0.0300467	9.46268e-06	1.02367e-05	0.516519	0.0181407	0.0173744	0.00136276	0.000310794	6.8777e-05
C5	0.00520794	0.0434609	0.000795181	6.40784e-05	3.9714	4.38158e-05	0.924437	4.00771e-06	0.471551	2.38506e-06	5.22925e-06	0.0304415	0.0306973	0.000533967	0.000187332	5.53314e-05	0.515821	0.0181408	0.0184661
C6	0.0177393	0.00285923	0.00320701	0.922367	4.38158e-05	4.07903	1.71995e-05	0.0282531	4.71287e-05	0.481295	0.48286	3.99152e-06	7.31684e-06	0.0384633	0.00926058	0.00631101	0.000521158	0.000221788	5.93698e-05
C7	0.000920964	0.021047	0.000348919	7.6868e-05	0.924437	1.71995e-05	4.08261	2.66939e-06	0.029105	1.90243e-06	6.67629e-06	0.483806	0.481507	0.000343068	0.000129054	2.90882e-05	0.0371316	0.00646617	0.00912051
H8	0.00195523	0.000472248	0.00645759	0.469525	4.00771e-06	0.0282531	2.66939e-06	0.391565	1.41887e-06	0.00657029	0.00355273	1.80157e-07	2.80516e-07	0.0190386	0.00131371	0.00488003	4.41169e-05	6.25018e-06	1.39489e-05
H9	0.00643958	0.00460568	0.000557679	3.11378e-05	0.471551	4.71287e-05	0.029105	1.41887e-06	0.409605	1.86059e-06	2.32318e-06	0.00365102	0.00672193	0.000495325	9.57885e-05	1.3754e-05	0.0195513	0.00513306	0.00105615
H10	0.000757742	0.000175889	0.000396281	0.030488	2.38506e-06	0.481295	1.90243e-06	0.00657029	1.86059e-06	0.413201	0.0167465	2.45226e-07	3.45621e-07	0.00641409	0.00046531	0.00396646	3.13042e-05	1.02303e-05	3.0568e-06
H11	0.00100574	0.000325325	0.000203099	0.0300467	5.22925e-06	0.48286	6.67629e-06	0.00355273	2.32318e-06	0.0167465	0.405992	8.84932e-07	7.67979e-07	0.00639752	0.000755795	0.000458639	8.3513e-05	2.03641e-05	4.91949e-06
H12	0.000100672	0.00151882	3.79256e-05	9.46268e-06	0.0304415	3.99152e-06	0.483806	1.80157e-07	0.00365102	2.45226e-07	8.84932e-07	0.410452	0.0169163	4.34772e-05	1.0885e-05	1.96671e-06	0.00632594	0.000483317	0.000740015
H13	0.000271304	0.00101463	4.14805e-05	1.02367e-05	0.0306973	7.31684e-06	0.481507	2.80516e-07	0.00672193	3.45621e-07	7.67979e-07	0.0169163	0.415468	4.95835e-05	6.54917e-06	2.05953e-06	0.00640809	0.00433112	0.000438639
C14	0.464226	0.0383864	0.0612367	0.516519	0.000533967	0.0384633	0.000343068	0.0190386	0.000495325	0.00641409	0.00639752	4.34772e-05	4.95835e-05	4.06902	0.459347	0.463714	0.00536813	0.000876523	0.000517439
H15	0.0250418	0.0111262	0.00563678	0.0181407	0.000187332	0.00926058	0.000129054	0.00131371	9.57885e-05	0.00046531	0.000755795	1.0885e-05	6.54917e-06	0.459347	0.376376	0.0139909	0.000654099	2.9078e-05	5.07491e-05
H16	0.0197865	0.00910825	0.00805495	0.0173744	5.53314e-05	0.00631101	2.90882e-05	0.00488003	1.3754e-05	0.00396646	0.000458639	1.96671e-06	2.05953e-06	0.463714	0.0139909	0.389434	0.000617993	4.69162e-05	0.000143889
C17	0.0243198	0.535283	0.00748899	0.00136276	0.515821	0.000521158	0.0371316	4.41169e-05	0.0195513	3.13042e-05	8.3513e-05	0.00632594	0.00640809	0.00536813	0.000654099	0.000617993	4.01867	0.463862	0.456654
H18	0.00563761	0.0264783	0.00106286	0.000310794	0.0181408	0.000221788	0.00646617	6.25018e-06	0.00513306	1.02303e-05	2.03641e-05	0.000483317	0.00433112	0.000876523	2.9078e-05	4.69162e-05	0.463862	0.392541	0.0141541
H19	0.0059902	0.0284531	0.0102578	6.8777e-05	0.0184661	5.93698e-05	0.00912051	1.39489e-05	0.00105615	3.0568e-06	4.91949e-06	0.000740015	0.000438639	0.000517439	5.07491e-05	0.000143889	0.456654	0.0141541	0.372071
Total	14.7471	16.1155	9.22583	6.03898	6.03131	6.07257	6.07711	0.933657	0.958666	0.960528	0.948468	0.954545	0.963893	6.15099	0.922619	0.93799	6.1002	0.939812	0.918264	85.998
LDM — alliciin_conf_31_LIDI_matrix
	S1	S2	O3	C4	C5	C6	C7	H8	H9	H10	H11	H12	H13	C14	H15	H16	C17	H18	H19
S1	12.9223	0.53008	0.698585	0.0258472	0.00278461	0.0144601	0.0010605	0.00396678	0.00113393	0.000902479	0.000987098	0.000145723	0.000136606	0.465578	0.0243296	0.0236007	0.0261886	0.0116658	0.00479076		64.1291	21.8713	86
S2	0.53008	14.7264	0.102106	0.0195774	0.0427124	0.0136248	0.0202008	0.00116313	0.00423831	0.00194236	0.000382958	0.0010314	0.00147242	0.0336625	0.00977614	0.00610943	0.533534	0.0291069	0.026552
O3	0.698585	0.102106	8.30649	0.00893245	0.00801436	0.00494323	0.000911444	0.000649181	0.0139047	0.000292266	0.000593848	0.000338588	0.000105658	0.0629848	0.00582599	0.00587509	0.0051382	0.00221961	0.00101308
C4	0.0258472	0.0195774	0.00893245	3.97851	0.000262209	0.91689	0.000203823	0.47383	3.49019e-05	0.030035	0.0299969	1.04542e-05	1.95423e-05	0.52	0.0169013	0.0185695	0.00133861	7.44629e-05	5.81472e-05
C5	0.00278461	0.0427124	0.00801436	0.000262209	3.97927	0.000177432	0.92492	1.27835e-05	0.463614	1.16672e-05	6.12486e-06	0.0309285	0.0304008	0.000296942	5.61615e-05	6.30559e-05	0.513764	0.0187688	0.018153
C6	0.0144601	0.0136248	0.00494323	0.91689	0.000177432	4.06782	0.000159439	0.0292826	1.33755e-05	0.479695	0.482685	1.00281e-05	1.20458e-05	0.03772	0.00588994	0.010161	0.000745818	8.95789e-05	0.00010568
C7	0.0010605	0.0202008	0.000911444	0.000203823	0.92492	0.000159439	4.08734	6.45252e-06	0.0270617	1.15269e-05	4.49169e-06	0.482267	0.483975	0.000225726	2.07514e-05	7.49347e-05	0.0379867	0.0095585	0.00665443
H8	0.00396678	0.00116313	0.000649181	0.47383	1.27835e-05	0.0292826	6.45252e-06	0.410095	1.08958e-06	0.00669747	0.00367994	3.78871e-07	7.40587e-07	0.0200688	0.00509143	0.00121195	3.84294e-05	1.11243e-05	4.22918e-06
H9	0.00113393	0.00423831	0.0139047	3.49019e-05	0.463614	1.33755e-05	0.0270617	1.08958e-06	0.376759	1.30616e-06	2.31379e-06	0.00636648	0.00343835	0.000143782	9.60811e-06	1.82692e-05	0.0186688	0.00099537	0.00492958
H10	0.000902479	0.00194236	0.000292266	0.030035	1.16672e-05	0.479695	1.15269e-05	0.00669747	1.30616e-06	0.4069	0.016509	5.87046e-07	6.59692e-07	0.00628431	0.00374892	0.000489667	0.000153749	3.41051e-05	9.45829e-06
H11	0.000987098	0.000382958	0.000593848	0.0299969	6.12486e-06	0.482685	4.49169e-06	0.00367994	2.31379e-06	0.016509	0.406434	4.05531e-07	3.1157e-07	0.00630779	0.000418198	0.00074357	1.61119e-05	4.00295e-06	4.07739e-06
H12	0.000145723	0.0010314	0.000338588	1.04542e-05	0.0309285	1.00281e-05	0.482267	3.78871e-07	0.00636648	5.87046e-07	4.05531e-07	0.419688	0.0170964	2.85786e-05	1.72312e-06	9.72459e-06	0.00657973	0.000450937	0.00453549
H13	0.000136606	0.00147242	0.000105658	1.95423e-05	0.0304008	1.20458e-05	0.483975	7.40587e-07	0.00343835	6.59692e-07	3.1157e-07	0.0170964	0.410948	3.29669e-05	1.85083e-06	1.03881e-05	0.00642138	0.000749301	0.000493857
C14	0.465578	0.0336625	0.0629848	0.52	0.000296942	0.03772	0.000225726	0.0200688	0.000143782	0.00628431	0.00630779	2.85786e-05	3.29669e-05	4.06943	0.459503	0.460954	0.00552249	0.000721258	0.00105314
H15	0.0243296	0.00977614	0.00582599	0.0169013	5.61615e-05	0.00588994	2.07514e-05	0.00509143	9.60811e-06	0.00374892	0.000418198	1.72312e-06	1.85083e-06	0.459503	0.377464	0.0140774	0.00052125	0.000207288	5.84397e-05
H16	0.0236007	0.00610943	0.00587509	0.0185695	6.30559e-05	0.010161	7.49347e-05	0.00121195	1.82692e-05	0.000489667	0.00074357	9.72459e-06	1.03881e-05	0.460954	0.0140774	0.385793	0.00120824	6.36733e-05	0.000298431
C17	0.0261886	0.533534	0.0051382	0.00133861	0.513764	0.000745818	0.0379867	3.84294e-05	0.0186688	0.000153749	1.61119e-05	0.00657973	0.00642138	0.00552249	0.00052125	0.00120824	4.01062	0.460569	0.464745
H18	0.0116658	0.0291069	0.00221961	7.44629e-05	0.0187688	8.95789e-05	0.0095585	1.11243e-05	0.00099537	3.41051e-05	4.00295e-06	0.000450937	0.000749301	0.000721258	0.000207288	6.36733e-05	0.460569	0.390581	0.0146241
H19	0.00479076	0.026552	0.00101308	5.81472e-05	0.018153	0.00010568	0.00665443	4.22918e-06	0.00492958	9.45829e-06	4.07739e-06	0.00453549	0.000493857	0.00105314	5.84397e-05	0.000298431	0.464745	0.0146241	0.396127
Total	14.7586	16.1037	9.22893	6.0411	6.03421	6.06449	6.08265	0.955812	0.921335	0.953719	0.948775	0.96949	0.955316	6.15051	0.923903	0.929332	6.09376	0.940495	0.94421	86.0003
LDM — alliciin_conf_32_LIDI_matrix
	S1	S2	O3	C4	C5	C6	C7	H8	H9	H10	H11	H12	H13	C14	H15	H16	C17	H18	H19
S1	12.9161	0.520868	0.700788	0.0296027	0.00642275	0.0192856	0.00290222	0.0015006	0.000444532	0.00105103	0.000919864	0.000295798	0.000143317	0.463582	0.0247163	0.02296	0.02445	0.00241001	0.00621161		64.1513	21.8478	86
S2	0.520868	14.7461	0.102992	0.0165935	0.0432835	0.00459849	0.0200353	0.0122074	0.00687554	0.000438074	0.000212579	0.00116299	0.00122341	0.0338539	0.0101955	0.006114	0.532592	0.0302116	0.0270296
O3	0.700788	0.102992	8.30871	0.00965957	0.00145104	0.0057262	0.00116422	0.000639414	0.000131337	0.000352224	0.000482788	7.9447e-05	5.29754e-05	0.0620967	0.00572671	0.00526069	0.00812502	0.00052882	0.0115283
C4	0.0296027	0.0165935	0.00965957	3.97959	0.000117661	0.918783	0.000106516	0.46976	1.20722e-05	0.0302114	0.0298843	6.88489e-06	5.42565e-06	0.51966	0.017447	0.0176713	0.000957309	6.40979e-05	0.000165635
C5	0.00642275	0.0432835	0.00145104	0.000117661	3.9741	3.95199e-05	0.922163	5.94376e-05	0.47229	5.9874e-06	2.2864e-06	0.0302974	0.0304357	0.000986443	5.17845e-05	0.000306381	0.514708	0.0183838	0.0184796
C6	0.0192856	0.00459849	0.0057262	0.918783	3.95199e-05	4.07882	1.56199e-05	0.0284177	5.7799e-06	0.480964	0.482931	2.05224e-06	2.19484e-06	0.0383225	0.00773421	0.00689456	0.000211577	4.99907e-05	0.000135242
C7	0.00290222	0.0200353	0.00116422	0.000106516	0.922163	1.56199e-05	4.08172	7.98734e-05	0.0288813	6.58538e-06	1.5351e-06	0.48357	0.481138	0.000586504	4.6421e-05	0.000250516	0.0376345	0.00644451	0.00908978
H8	0.0015006	0.0122074	0.000639414	0.46976	5.94376e-05	0.0284177	7.98734e-05	0.397754	5.35653e-06	0.00656184	0.00358169	3.8044e-06	3.50081e-06	0.0192873	0.00173681	0.0045192	0.000827545	4.02378e-05	0.000151557
H9	0.000444532	0.00687554	0.000131337	1.20722e-05	0.47229	5.7799e-06	0.0288813	5.35653e-06	0.405165	4.67416e-07	3.10847e-07	0.00360414	0.00672148	3.1374e-05	1.22575e-05	5.09155e-06	0.0195866	0.00508511	0.00151178
H10	0.00105103	0.000438074	0.000352224	0.0302114	5.9874e-06	0.480964	6.58538e-06	0.00656184	4.67416e-07	0.411545	0.0166739	4.38375e-07	3.52175e-07	0.00636016	0.000472718	0.00371286	4.91016e-05	4.11389e-06	7.56542e-06
H11	0.000919864	0.000212579	0.000482788	0.0298843	2.2864e-06	0.482931	1.5351e-06	0.00358169	3.10847e-07	0.0166739	0.405766	1.73142e-07	1.26299e-07	0.00635636	0.000818053	0.00047488	1.67158e-05	2.95597e-06	6.06335e-06
H12	0.000295798	0.00116299	7.9447e-05	6.88489e-06	0.0302974	2.05224e-06	0.48357	3.8044e-06	0.00360414	4.38375e-07	1.73142e-07	0.409114	0.0167934	7.6078e-05	3.19547e-06	2.58268e-05	0.00639275	0.000478778	0.000758003
H13	0.000143317	0.00122341	5.29754e-05	5.42565e-06	0.0304357	2.19484e-06	0.481138	3.50081e-06	0.00672148	3.52175e-07	1.26299e-07	0.0167934	0.412552	3.02326e-05	3.2546e-06	1.02509e-05	0.00638501	0.00420192	0.0005169
C14	0.463582	0.0338539	0.0620967	0.51966	0.000986443	0.0383225	0.000586504	0.0192873	3.1374e-05	0.00636016	0.00635636	7.6078e-05	3.02326e-05	4.06971	0.461154	0.461954	0.00517271	0.000340352	0.000479253
H15	0.0247163	0.0101955	0.00572671	0.017447	5.17845e-05	0.00773421	4.6421e-05	0.00173681	1.22575e-05	0.000472718	0.000818053	3.19547e-06	3.2546e-06	0.461154	0.377335	0.0141806	0.000561124	0.000163789	4.74949e-05
H16	0.02296	0.006114	0.00526069	0.0176713	0.000306381	0.00689456	0.000250516	0.0045192	5.09155e-06	0.00371286	0.00047488	2.58268e-05	1.02509e-05	0.461954	0.0141806	0.388186	0.00115184	3.30242e-05	5.9692e-05
C17	0.02445	0.532592	0.00812502	0.000957309	0.514708	0.000211577	0.0376345	0.000827545	0.0195866	4.91016e-05	1.67158e-05	0.00639275	0.00638501	0.00517271	0.000561124	0.00115184	4.01693	0.466535	0.456071
H18	0.00241001	0.0302116	0.00052882	6.40979e-05	0.0183838	4.99907e-05	0.00644451	4.02378e-05	0.00508511	4.11389e-06	2.95597e-06	0.000478778	0.00420192	0.000340352	0.000163789	3.30242e-05	0.466535	0.400206	0.0144087
H19	0.00621161	0.0270296	0.0115283	0.000165635	0.0184796	0.000135242	0.00908978	0.000151557	0.00151178	7.56542e-06	6.06335e-06	0.000758003	0.0005169	0.000479253	4.74949e-05	5.9692e-05	0.456071	0.0144087	0.371964
Total	14.7447	16.1165	9.2255	6.04029	6.03358	6.07294	6.07584	0.947138	0.950369	0.958417	0.948132	0.952664	0.960219	6.15004	0.922406	0.933771	6.09836	0.949593	0.918622	85.9991
LDM — alliciin_conf_33_LIDI_matrix
	S1	S2	O3	C4	C5	C6	C7	H8	H9	H10	H11	H12	H13	C14	H15	H16	C17	H18	H19
S1	12.9198	0.52099	0.699489	0.0325135	0.00636325	0.0177288	0.00284226	0.0019913	0.000441597	0.00075594	0.00100591	0.000293605	0.000141493	0.464968	0.0251277	0.0197861	0.0243065	0.00238387	0.00624223		64.1686	21.8312	86
S2	0.52099	14.7622	0.102364	0.00670188	0.0432782	0.00284059	0.0200688	0.000467722	0.00693635	0.000172277	0.000325587	0.00116479	0.00122298	0.0382736	0.0112276	0.00896592	0.533418	0.0302478	0.0272957
O3	0.699489	0.102364	8.30563	0.010327	0.00143141	0.00316565	0.00114477	0.00642408	0.000127453	0.000394772	0.000203759	7.85908e-05	5.24978e-05	0.0613786	0.00580173	0.00808441	0.0079856	0.000522307	0.0115142
C4	0.0325135	0.00670188	0.010327	3.9829	0.000301994	0.922365	0.000250052	0.469579	7.51238e-06	0.0304895	0.0300531	2.55378e-05	1.0773e-05	0.516672	0.0181199	0.017418	0.00129165	4.08933e-05	7.20943e-05
C5	0.00636325	0.0432782	0.00143141	0.000301994	3.97428	0.000213429	0.922212	8.65446e-06	0.472299	9.91977e-06	1.96308e-05	0.0302973	0.0304625	0.000915595	4.94789e-05	6.2763e-05	0.514824	0.0184353	0.0184791
C6	0.0177288	0.00284059	0.00316565	0.922365	0.000213429	4.07898	0.000124386	0.0282786	4.79955e-06	0.481295	0.482892	1.72083e-05	6.0686e-06	0.0384328	0.0092853	0.00629331	0.000485341	2.64486e-05	6.13096e-05
C7	0.00284226	0.0200688	0.00114477	0.000250052	0.922212	0.000124386	4.08172	9.67609e-06	0.0288745	7.91845e-06	1.73719e-05	0.483561	0.481142	0.000560957	5.13321e-05	7.23404e-05	0.0376603	0.00645147	0.00911033
H8	0.0019913	0.000467722	0.00642408	0.469579	8.65446e-06	0.0282786	9.67609e-06	0.391891	6.1989e-07	0.00657386	0.0035559	6.08382e-07	4.13627e-07	0.0190686	0.00130672	0.00489414	4.45201e-05	2.19186e-06	1.43671e-05
H9	0.000441597	0.00693635	0.000127453	7.51238e-06	0.472299	4.79955e-06	0.0288745	6.1989e-07	0.405098	2.81208e-07	3.02814e-07	0.00360285	0.00672093	3.29396e-05	1.27135e-05	5.68443e-06	0.0196141	0.00508617	0.00151002
H10	0.00075594	0.000172277	0.000394772	0.0304895	9.91977e-06	0.481295	7.91845e-06	0.00657386	2.81208e-07	0.413307	0.0167538	8.77789e-07	3.57036e-07	0.00638938	0.000465463	0.00396529	2.92315e-05	1.37663e-06	3.05859e-06
H11	0.00100591	0.000325587	0.000203759	0.0300531	1.96308e-05	0.482892	1.73719e-05	0.0035559	3.02814e-07	0.0167538	0.406139	1.94816e-06	7.63656e-07	0.00639717	0.00075423	0.00045877	7.82483e-05	3.67949e-06	5.08521e-06
H12	0.000293605	0.00116479	7.85908e-05	2.55378e-05	0.0302973	1.72083e-05	0.483561	6.08382e-07	0.00360285	8.77789e-07	1.94816e-06	0.409007	0.0167901	7.04862e-05	3.22363e-06	4.24355e-06	0.00639342	0.000479252	0.000757981
H13	0.000141493	0.00122298	5.24978e-05	1.0773e-05	0.0304625	6.0686e-06	0.481142	4.13627e-07	0.00672093	3.57036e-07	7.63656e-07	0.0167901	0.412599	2.9489e-05	3.39776e-06	3.3614e-06	0.00638945	0.00421028	0.000518272
C14	0.464968	0.0382736	0.0613786	0.516672	0.000915595	0.0384328	0.000560957	0.0190686	3.29396e-05	0.00638938	0.00639717	7.04862e-05	2.9489e-05	4.06955	0.459267	0.463838	0.00519803	0.000351993	0.000541908
H15	0.0251277	0.0112276	0.00580173	0.0181199	4.94789e-05	0.0092853	5.13321e-05	0.00130672	1.27135e-05	0.000465463	0.00075423	3.22363e-06	3.39776e-06	0.459267	0.375732	0.0139863	0.000668283	0.000178003	5.23407e-05
H16	0.0197861	0.00896592	0.00808441	0.017418	6.2763e-05	0.00629331	7.23404e-05	0.00489414	5.68443e-06	0.00396529	0.00045877	4.24355e-06	3.3614e-06	0.463838	0.0139863	0.390303	0.000631113	2.97124e-05	0.000137205
C17	0.0243065	0.533418	0.0079856	0.00129165	0.514824	0.000485341	0.0376603	4.45201e-05	0.0196141	2.92315e-05	7.82483e-05	0.00639342	0.00638945	0.00519803	0.000668283	0.000631113	4.01701	0.466576	0.456058
H18	0.00238387	0.0302478	0.000522307	4.08933e-05	0.0184353	2.64486e-05	0.00645147	2.19186e-06	0.00508617	1.37663e-06	3.67949e-06	0.000479252	0.00421028	0.000351993	0.000178003	2.97124e-05	0.466576	0.400601	0.0144143
H19	0.00624223	0.0272957	0.0115142	7.20943e-05	0.0184791	6.13096e-05	0.00911033	1.43671e-05	0.00151002	3.05859e-06	5.08521e-06	0.000757981	0.000518272	0.000541908	5.23407e-05	0.000137205	0.456058	0.0144143	0.371936
Total	14.7471	16.1181	9.22612	6.03914	6.03394	6.0725	6.07588	0.934112	0.950376	0.960615	0.948666	0.952549	0.960304	6.15194	0.922093	0.938939	6.09866	0.950041	0.918723	85.9999
LDM — alliciin_conf_34_LIDI_matrix
	S1	S2	O3	C4	C5	C6	C7	H8	H9	H10	H11	H12	H13	C14	H15	H16	C17	H18	H19
S1	12.9014	0.528139	0.703423	0.0292496	0.00578821	0.018817	0.00282835	0.00150822	0.000252373	0.000987223	0.000914067	0.000283709	0.00013898	0.461749	0.0226641	0.0245715	0.0253095	0.00154104	0.011812		64.1358	21.8649	86
S2	0.528139	14.7327	0.104053	0.0161333	0.0433167	0.00406534	0.0202693	0.0127721	0.00674743	0.000404641	0.000188984	0.00116179	0.00122859	0.0343169	0.00614082	0.00978279	0.532533	0.029243	0.0284174
O3	0.703423	0.104053	8.31511	0.00961803	0.00166898	0.00574225	0.00118264	0.000648265	0.000282618	0.000362585	0.000486321	6.97564e-05	6.71859e-05	0.063555	0.00609847	0.00527416	0.00426155	0.00177358	0.00152465
C4	0.0292496	0.0161333	0.00961803	3.97893	6.92493e-05	0.919659	3.57397e-05	0.469759	1.82676e-05	0.0302524	0.0299714	3.60632e-06	4.70365e-06	0.519571	0.0175853	0.0176162	0.000703194	0.000208377	6.90381e-05
C5	0.00578821	0.0433167	0.00166898	6.92493e-05	3.97548	0.000111421	0.922192	4.00054e-05	0.473087	7.27505e-06	6.07493e-06	0.0302977	0.0302887	0.00097873	0.00026354	6.97462e-05	0.514991	0.0182344	0.0189384
C6	0.018817	0.00406534	0.00574225	0.919659	0.000111421	4.08004	4.29384e-05	0.0284113	8.70721e-06	0.481012	0.483108	6.27423e-06	2.97232e-06	0.0384123	0.0067944	0.00785909	0.000224708	5.36637e-05	6.23143e-05
C7	0.00282835	0.0202693	0.00118264	3.57397e-05	0.922192	4.29384e-05	4.08044	2.02086e-05	0.0291377	4.74534e-06	4.02728e-06	0.483489	0.480575	0.000585243	0.000231119	0.000100481	0.0374517	0.00636177	0.00933958
H8	0.00150822	0.0127721	0.000648265	0.469759	4.00054e-05	0.0284113	2.02086e-05	0.39729	1.6292e-05	0.00656807	0.00358833	1.22162e-06	2.95998e-06	0.0192185	0.00455927	0.00169356	0.000636402	0.000191006	3.31174e-05
H9	0.000252373	0.00674743	0.000282618	1.82676e-05	0.473087	8.70721e-06	0.0291377	1.6292e-05	0.409381	5.47597e-07	3.63066e-07	0.00362312	0.00673488	1.84927e-05	3.47186e-06	4.56672e-06	0.0197969	0.00507434	0.00154516
H10	0.000987223	0.000404641	0.000362585	0.0302524	7.27505e-06	0.481012	4.74534e-06	0.00656807	5.47597e-07	0.411844	0.0167163	4.75654e-07	2.46793e-07	0.00639019	0.00375974	0.000474899	4.37359e-05	6.10646e-06	3.90917e-06
H11	0.000914067	0.000188984	0.000486321	0.0299714	6.07493e-06	0.483108	4.02728e-06	0.00358833	3.63066e-07	0.0167163	0.406755	4.41861e-07	2.10734e-07	0.00636342	0.000472251	0.000821771	2.05704e-05	1.8028e-06	2.57301e-06
H12	0.000283709	0.00116179	6.97564e-05	3.60632e-06	0.0302977	6.27423e-06	0.483489	1.22162e-06	0.00362312	4.75654e-07	4.41861e-07	0.408924	0.0166919	8.64809e-05	2.4018e-05	5.48702e-06	0.00637365	0.000469625	0.000781959
H13	0.00013898	0.00122859	6.71859e-05	4.70365e-06	0.0302887	2.97232e-06	0.480575	2.95998e-06	0.00673488	2.46793e-07	2.10734e-07	0.0166919	0.409521	3.0608e-05	9.89608e-06	4.11999e-06	0.00637003	0.00411848	0.000520863
C14	0.461749	0.0343169	0.063555	0.519571	0.00097873	0.0384123	0.000585243	0.0192185	1.84927e-05	0.00639019	0.00636342	8.64809e-05	3.0608e-05	4.0679	0.461356	0.461929	0.0057016	0.0002185	0.000797352
H15	0.0226641	0.00614082	0.00609847	0.0175853	0.00026354	0.0067944	0.000231119	0.00455927	3.47186e-06	0.00375974	0.000472251	2.4018e-05	9.89608e-06	0.461356	0.386694	0.0143	0.00118192	4.45979e-05	5.98616e-05
H16	0.0245715	0.00978279	0.00527416	0.0176162	6.97462e-05	0.00785909	0.000100481	0.00169356	4.56672e-06	0.000474899	0.000821771	5.48702e-06	4.11999e-06	0.461929	0.0143	0.380422	0.000695373	2.61857e-05	0.000227185
C17	0.0253095	0.532533	0.00426155	0.000703194	0.514991	0.000224708	0.0374517	0.000636402	0.0197969	4.37359e-05	2.05704e-05	0.00637365	0.00637003	0.0057016	0.00118192	0.000695373	4.01078	0.4646	0.461115
H18	0.00154104	0.029243	0.00177358	0.000208377	0.0182344	5.36637e-05	0.00636177	0.000191006	0.00507434	6.10646e-06	1.8028e-06	0.000469625	0.00411848	0.0002185	4.45979e-05	2.61857e-05	0.4646	0.391009	0.0146421
H19	0.011812	0.0284174	0.00152465	6.90381e-05	0.0189384	6.23143e-05	0.00933958	3.31174e-05	0.00154516	3.90917e-06	2.57301e-06	0.000781959	0.000520863	0.000797352	5.98616e-05	0.000227185	0.461115	0.0146421	0.391069
Total	14.7414	16.1116	9.2252	6.03946	6.03583	6.07443	6.07429	0.946958	0.955733	0.958839	0.949422	0.952295	0.956312	6.14918	0.932243	0.925878	6.09279	0.937818	0.940961	86.0007
LDM — alliciin_conf_35_LIDI_matrix
	S1	S2	O3	C4	C5	C6	C7	H8	H9	H10	H11	H12	H13	C14	H15	H16	C17	H18	H19
S1	12.9074	0.527033	0.7018	0.0318041	0.00593642	0.0174614	0.00287623	0.00199398	0.000260095	0.00101497	0.000746929	0.000286567	0.000141281	0.462965	0.0195908	0.0249012	0.0252062	0.0111345	0.00160444		64.1544	21.8461	86
S2	0.527033	14.7503	0.103301	0.00676025	0.043157	0.0028113	0.020211	0.000496409	0.00663927	0.000324311	0.000177878	0.00115561	0.00123137	0.038398	0.00921172	0.0109344	0.533121	0.0285761	0.029431
O3	0.7018	0.103301	8.31079	0.0117924	0.00164415	0.00340702	0.00113959	0.00755352	0.000296425	0.000216457	0.000419353	6.6845e-05	6.90473e-05	0.0622813	0.00805182	0.00538827	0.00449698	0.00146616	0.0021473
C4	0.0318041	0.00676025	0.0117924	3.98289	0.000258147	0.92246	0.000222684	0.468806	5.48431e-06	0.0300844	0.0305636	2.31839e-05	9.69048e-06	0.516528	0.0173864	0.0183612	0.00127746	7.14528e-05	5.79978e-05
C5	0.00593642	0.043157	0.00164415	0.000258147	3.97559	0.00017101	0.922197	7.41398e-06	0.473177	2.05314e-05	7.90497e-06	0.030291	0.0302368	0.000977997	4.06476e-05	7.21592e-05	0.514924	0.019002	0.0181125
C6	0.0174614	0.0028113	0.00340702	0.92246	0.00017101	4.07969	9.16795e-05	0.0280952	3.42007e-06	0.482971	0.481462	1.54208e-05	4.76662e-06	0.0385051	0.00626719	0.00947031	0.000487657	0.000101184	1.78257e-05
C7	0.00287623	0.020211	0.00113959	0.000222684	0.922197	9.16795e-05	4.08012	5.74241e-06	0.0291762	1.86689e-05	6.13861e-06	0.483463	0.480586	0.000584167	2.22734e-05	0.000110792	0.0375333	0.00932164	0.00638481
H8	0.00199398	0.000496409	0.00755352	0.468806	7.41398e-06	0.0280952	5.74241e-06	0.389679	1.15082e-06	0.00354704	0.00655073	3.85179e-07	3.2335e-07	0.0189541	0.00488467	0.00127856	3.27413e-05	3.4213e-06	8.43065e-06
H9	0.000260095	0.00663927	0.000296425	5.48431e-06	0.473177	3.42007e-06	0.0291762	1.15082e-06	0.409479	2.98209e-07	1.99495e-07	0.00362431	0.00673194	2.45514e-05	1.2285e-05	4.80509e-06	0.0198059	0.00154735	0.00506085
H10	0.00101497	0.000324311	0.000216457	0.0300844	2.05314e-05	0.482971	1.86689e-05	0.00354704	2.98209e-07	0.406525	0.0167909	2.08726e-06	8.14293e-07	0.00639873	0.000456985	0.000757427	8.47146e-05	5.32584e-06	1.83964e-06
H11	0.000746929	0.000177878	0.000419353	0.0305636	7.90497e-06	0.481462	6.13861e-06	0.00655073	1.99495e-07	0.0167909	0.414003	8.04294e-07	3.00719e-07	0.00640611	0.00397546	0.000470032	2.93203e-05	4.2021e-06	1.86059e-06
H12	0.000286567	0.00115561	6.6845e-05	2.31839e-05	0.030291	1.54208e-05	0.483463	3.85179e-07	0.00362431	2.08726e-06	8.04294e-07	0.408817	0.0166804	8.18818e-05	1.9531e-06	5.77205e-06	0.00637454	0.000784748	0.000469788
H13	0.000141281	0.00123137	6.90473e-05	9.69048e-06	0.0302368	4.76662e-06	0.480586	3.2335e-07	0.00673194	8.14293e-07	3.00719e-07	0.0166804	0.409314	3.03554e-05	2.96381e-06	4.50557e-06	0.00636761	0.000521832	0.00410689
C14	0.462965	0.038398	0.0622813	0.516528	0.000977997	0.0385051	0.000584167	0.0189541	2.45514e-05	0.00639873	0.00640611	8.18818e-05	3.03554e-05	4.06714	0.464113	0.45988	0.00561181	0.000734318	0.000254959
H15	0.0195908	0.00921172	0.00805182	0.0173864	4.06476e-05	0.00626719	2.22734e-05	0.00488467	1.2285e-05	0.000456985	0.00397546	1.9531e-06	2.96381e-06	0.464113	0.390291	0.0140828	0.000481363	2.76228e-05	0.00015723
H16	0.0249012	0.0109344	0.00538827	0.0183612	7.21592e-05	0.00947031	0.000110792	0.00127856	4.80509e-06	0.000757427	0.000470032	5.77205e-06	4.50557e-06	0.45988	0.0140828	0.378834	0.000795941	0.000230433	3.0555e-05
C17	0.0252062	0.533121	0.00449698	0.00127746	0.514924	0.000487657	0.0375333	3.27413e-05	0.0198059	8.47146e-05	2.93203e-05	0.00637454	0.00636761	0.00561181	0.000481363	0.000795941	4.01101	0.46165	0.464258
H18	0.0111345	0.0285761	0.00146616	7.14528e-05	0.019002	0.000101184	0.00932164	3.4213e-06	0.00154735	5.32584e-06	4.2021e-06	0.000784748	0.000521832	0.000734318	2.76228e-05	0.000230433	0.46165	0.392416	0.01467
H19	0.00160444	0.029431	0.0021473	5.79978e-05	0.0181125	1.78257e-05	0.00638481	8.43065e-06	0.00506085	1.83964e-06	1.86059e-06	0.000469788	0.00410689	0.000254959	0.00015723	3.0555e-05	0.464258	0.01467	0.390111
Total	14.7442	16.1133	9.22633	6.03936	6.03582	6.07349	6.07407	0.931898	0.95585	0.949222	0.961617	0.952145	0.956041	6.14987	0.939058	0.925613	6.09355	0.942269	0.936887	86.0006
LDM — alliciin_conf_36_LIDI_matrix
	S1	S2	O3	C4	C5	C6	C7	H8	H9	H10	H11	H12	H13	C14	H15	H16	C17	H18	H19
S1	12.9075	0.527157	0.701795	0.031788	0.00593474	0.0174541	0.00287641	0.00199129	0.000260103	0.000746781	0.00101489	0.000286563	0.000141295	0.463038	0.0249219	0.0196032	0.0251861	0.00160385	0.0111334		64.1539	21.8446	86
S2	0.527157	14.7504	0.103303	0.00676002	0.0431339	0.00281183	0.020208	0.000496433	0.00663931	0.000177898	0.000324343	0.00115579	0.00123142	0.0384519	0.0109348	0.00921186	0.532992	0.0294311	0.0285893
O3	0.701795	0.103303	8.3108	0.0117766	0.00164324	0.00340685	0.00113953	0.00755369	0.000296429	0.000419359	0.00021645	6.68425e-05	6.90466e-05	0.0622817	0.00538834	0.008052	0.00448017	0.00214739	0.00146633
C4	0.031788	0.00676002	0.0117766	3.98276	0.000258103	0.922386	0.000222652	0.468789	5.48435e-06	0.0305342	0.0300774	2.31824e-05	9.68975e-06	0.516496	0.018356	0.0173601	0.00127694	5.79917e-05	7.14329e-05
C5	0.00593474	0.0431339	0.00164324	0.000258103	3.97541	0.000170998	0.922106	7.40883e-06	0.473134	7.90449e-06	2.05298e-05	0.0302785	0.0302176	0.000978158	7.21393e-05	4.059e-05	0.514755	0.0180867	0.0189992
C6	0.0174541	0.00281183	0.00340685	0.922386	0.000170998	4.07965	9.1676e-05	0.0280938	3.42015e-06	0.481449	0.482965	1.54202e-05	4.7666e-06	0.0385042	0.00947005	0.00626552	0.000487369	1.78258e-05	0.000101187
C7	0.00287641	0.020208	0.00113953	0.000222652	0.922106	9.1676e-05	4.07991	5.74163e-06	0.0291699	6.13846e-06	1.86684e-05	0.483445	0.480522	0.000584482	0.000110788	2.22533e-05	0.0374352	0.00635946	0.00931962
H8	0.00199129	0.000496433	0.00755369	0.468789	7.40883e-06	0.0280938	5.74163e-06	0.389679	1.1508e-06	0.00655071	0.00354707	3.85197e-07	3.23391e-07	0.0189513	0.00127852	0.00488469	3.27044e-05	8.431e-06	3.42153e-06
H9	0.000260103	0.00663931	0.000296429	5.48435e-06	0.473134	3.42015e-06	0.0291699	1.1508e-06	0.409478	1.99551e-07	2.98308e-07	0.00362427	0.00673195	2.45826e-05	4.80508e-06	1.22851e-05	0.0198004	0.00506088	0.00154735
H10	0.000746781	0.000177898	0.000419359	0.0305342	7.90449e-06	0.481449	6.13846e-06	0.00655071	1.99551e-07	0.414003	0.0167906	8.04237e-07	3.00866e-07	0.00640439	0.000470036	0.00397578	2.93066e-05	1.86076e-06	4.20233e-06
H11	0.00101489	0.000324343	0.00021645	0.0300774	2.05298e-05	0.482965	1.86684e-05	0.00354707	2.98308e-07	0.0167906	0.406523	2.0872e-06	8.14293e-07	0.00639878	0.000757447	0.000457045	8.46904e-05	1.83972e-06	5.32564e-06
H12	0.000286563	0.00115579	6.68425e-05	2.31824e-05	0.0302785	1.54202e-05	0.483445	3.85197e-07	0.00362427	8.04237e-07	2.0872e-06	0.40882	0.0166807	8.19053e-05	5.77195e-06	1.95298e-06	0.00637245	0.000469831	0.000784725
H13	0.000141295	0.00123142	6.90466e-05	9.68975e-06	0.0302176	4.7666e-06	0.480522	3.23391e-07	0.00673195	3.00866e-07	8.14293e-07	0.0166807	0.409313	3.03728e-05	4.50558e-06	2.96365e-06	0.00636422	0.0041071	0.000521851
C14	0.463038	0.0384519	0.0622817	0.516496	0.000978158	0.0385042	0.000584482	0.0189513	2.45826e-05	0.00640439	0.00639878	8.19053e-05	3.03728e-05	4.06727	0.459893	0.464138	0.00561635	0.000255598	0.000734617
H15	0.0249219	0.0109348	0.00538834	0.018356	7.21393e-05	0.00947005	0.000110788	0.00127852	4.80508e-06	0.000470036	0.000757447	5.77195e-06	4.50558e-06	0.459893	0.378835	0.0140828	0.000795682	3.05562e-05	0.000230437
H16	0.0196032	0.00921186	0.008052	0.0173601	4.059e-05	0.00626552	2.22533e-05	0.00488469	1.22851e-05	0.00397578	0.000457045	1.95298e-06	2.96365e-06	0.464138	0.0140828	0.390291	0.000481304	0.000157231	2.7624e-05
C17	0.0251861	0.532992	0.00448017	0.00127694	0.514755	0.000487369	0.0374352	3.27044e-05	0.0198004	2.93066e-05	8.46904e-05	0.00637245	0.00636422	0.00561635	0.000795682	0.000481304	4.01078	0.464242	0.461629
H18	0.00160385	0.0294311	0.00214739	5.79917e-05	0.0180867	1.78258e-05	0.00635946	8.431e-06	0.00506088	1.86076e-06	1.83972e-06	0.000469831	0.0041071	0.000255598	3.05562e-05	0.000157231	0.464242	0.390108	0.0146701
H19	0.0111334	0.0285893	0.00146633	7.14329e-05	0.0189992	0.000101187	0.00931962	3.42153e-06	0.00154735	4.20233e-06	5.32564e-06	0.000784725	0.000521851	0.000734617	0.000230437	2.7624e-05	0.461629	0.0146701	0.39242
Total	14.7444	16.1134	9.2263	6.03901	6.03526	6.07335	6.07355	0.931875	0.955795	0.961572	0.949206	0.952116	0.955954	6.15013	0.925642	0.939068	6.09285	0.936818	0.942259	85.9985
LDM — alliciin_conf_37_LIDI_matrix
	S1	S2	O3	C4	C5	C6	C7	H8	H9	H10	H11	H12	H13	C14	H15	H16	C17	H18	H19
S1	12.9256	0.524902	0.702079	0.0295356	0.00640113	0.0231738	0.00284093	0.00157361	0.000468046	0.00103675	0.00126806	0.000289376	0.000143407	0.458679	0.0235646	0.0209362	0.0255274	0.00284625	0.00639927		64.1269	21.8728	86
S2	0.524902	14.7428	0.102193	0.0185278	0.0430622	0.00444565	0.0199724	0.00871941	0.00686171	0.000389365	0.000207043	0.0011595	0.00120944	0.0337068	0.00631116	0.00797543	0.532397	0.0299303	0.0275858
O3	0.702079	0.102193	8.28987	0.0139012	0.00139412	0.0166549	0.00111357	0.000577568	0.000128272	0.0048074	0.000653312	7.37148e-05	5.05637e-05	0.0615153	0.00429554	0.00804502	0.0067392	0.000516698	0.00909089
C4	0.0295356	0.0185278	0.0139012	3.96949	8.55846e-05	0.91117	7.20707e-05	0.471957	1.65587e-05	0.0289125	0.0300254	6.10551e-06	5.11348e-06	0.51975	0.0182497	0.0175824	0.00113614	0.000234501	0.000106241
C5	0.00640113	0.0430622	0.00139412	8.55846e-05	3.97462	8.85716e-05	0.922278	3.29952e-05	0.472342	6.34252e-06	4.36253e-06	0.0303086	0.03045	0.00107259	0.000331243	5.64229e-05	0.514699	0.0184073	0.0186746
C6	0.0231738	0.00444565	0.0166549	0.91117	8.85716e-05	4.06101	1.36707e-05	0.0289328	7.13854e-06	0.477571	0.483123	3.49526e-06	2.00622e-06	0.0374212	0.0071355	0.00582272	0.000300619	0.000130308	6.82275e-05
C7	0.00284093	0.0199724	0.00111357	7.20707e-05	0.922278	1.36707e-05	4.08178	3.65261e-05	0.0288905	4.62103e-06	6.5863e-07	0.483581	0.481176	0.000635506	0.000274434	5.06827e-05	0.0376016	0.00644968	0.00919891
H8	0.00157361	0.00871941	0.000577568	0.471957	3.29952e-05	0.0289328	3.65261e-05	0.405574	8.17608e-06	0.0064911	0.00364248	2.23789e-06	2.35905e-06	0.0198161	0.00397003	0.00230477	0.000703667	0.000107217	4.71239e-05
H9	0.000468046	0.00686171	0.000128272	1.65587e-05	0.472342	7.13854e-06	0.0288905	8.17608e-06	0.405103	5.69018e-07	3.65843e-07	0.0036064	0.00672458	3.2419e-05	8.31268e-06	6.67137e-06	0.0195672	0.00508971	0.00151213
H10	0.00103675	0.000389365	0.0048074	0.0289125	6.34252e-06	0.477571	4.62103e-06	0.0064911	5.69018e-07	0.400944	0.0163865	2.99343e-07	2.32573e-07	0.00585647	0.00282964	0.000407318	3.88473e-05	6.57047e-06	6.57328e-06
H11	0.00126806	0.000207043	0.000653312	0.0300254	4.36253e-06	0.483123	6.5863e-07	0.00364248	3.65843e-07	0.0163865	0.408821	1.7409e-07	9.16088e-08	0.00633422	0.000450172	0.000840157	1.81719e-05	5.21276e-06	3.60299e-06
H12	0.000289376	0.0011595	7.37148e-05	6.10551e-06	0.0303086	3.49526e-06	0.483581	2.23789e-06	0.0036064	2.99343e-07	1.7409e-07	0.40917	0.0168036	8.23079e-05	2.64364e-05	3.25836e-06	0.00639032	0.00047919	0.000766487
H13	0.000143407	0.00120944	5.05637e-05	5.11348e-06	0.03045	2.00622e-06	0.481176	2.35905e-06	0.00672458	2.32573e-07	9.16088e-08	0.0168036	0.412798	3.27021e-05	1.12362e-05	2.81648e-06	0.00638186	0.00421303	0.000521927
C14	0.458679	0.0337068	0.0615153	0.51975	0.00107259	0.0374212	0.000635506	0.0198161	3.2419e-05	0.00585647	0.00633422	8.23079e-05	3.27021e-05	4.06588	0.463008	0.467368	0.00534456	0.000279194	0.000512494
H15	0.0235646	0.00631116	0.00429554	0.0182497	0.000331243	0.0071355	0.000274434	0.00397003	8.31268e-06	0.00282964	0.000450172	2.64364e-05	1.12362e-05	0.463008	0.389997	0.0146536	0.00110003	1.62341e-05	4.50919e-05
H16	0.0209362	0.00797543	0.00804502	0.0175824	5.64229e-05	0.00582272	5.06827e-05	0.00230477	6.67137e-06	0.000407318	0.000840157	3.25836e-06	2.81648e-06	0.467368	0.0146536	0.392362	0.000434302	3.57238e-05	0.000118951
C17	0.0255274	0.532397	0.0067392	0.00113614	0.514699	0.000300619	0.0376016	0.000703667	0.0195672	3.88473e-05	1.81719e-05	0.00639032	0.00638186	0.00534456	0.00110003	0.000434302	4.01405	0.466388	0.457603
H18	0.00284625	0.0299303	0.000516698	0.000234501	0.0184073	0.000130308	0.00644968	0.000107217	0.00508971	6.57047e-06	5.21276e-06	0.00047919	0.00421303	0.000279194	1.62341e-05	3.57238e-05	0.466388	0.400961	0.014562
H19	0.00639927	0.0275858	0.00909089	0.000106241	0.0186746	6.82275e-05	0.00919891	4.71239e-05	0.00151213	6.57328e-06	3.60299e-06	0.000766487	0.000521927	0.000512494	4.50919e-05	0.000118951	0.457603	0.014562	0.376129
Total	14.7573	16.1123	9.2237	6.03076	6.03432	6.05708	6.07597	0.9545	0.950374	0.945696	0.951785	0.952752	0.960528	6.14732	0.936277	0.939007	6.09642	0.950658	0.922952	85.9997
LDM — alliciin_conf_38_LIDI_matrix
	S1	S2	O3	C4	C5	C6	C7	H8	H9	H10	H11	H12	H13	C14	H15	H16	C17	H18	H19
S1	12.9141	0.529093	0.70372	0.0297225	0.00584546	0.0231315	0.00287303	0.00157541	0.00026099	0.00105387	0.00126051	0.000141834	0.00028575	0.457688	0.0207437	0.0232906	0.0262348	0.0124659	0.00156244		64.115	21.8857	86
S2	0.529093	14.7321	0.102447	0.0189454	0.0434193	0.00483604	0.0203236	0.00840724	0.00673123	0.000392022	0.000222853	0.00124492	0.00115915	0.0337898	0.00810618	0.00654091	0.532275	0.0281291	0.0295558
O3	0.70372	0.102447	8.29495	0.0133894	0.00169014	0.0167159	0.00123217	0.000613634	0.000273125	0.00536375	0.00067649	6.71307e-05	7.28535e-05	0.0625923	0.00808699	0.00484859	0.00402497	0.00150641	0.00156371
C4	0.0297225	0.0189454	0.0133894	3.97289	0.000137608	0.911037	0.000153015	0.472166	8.93689e-06	0.028789	0.0300564	6.95797e-06	9.67129e-06	0.519639	0.0176378	0.0182486	0.00136173	0.000266223	6.52471e-05
C5	0.00584546	0.0434193	0.00169014	0.000137608	3.97522	4.86444e-05	0.922031	3.91327e-05	0.473157	5.0459e-06	2.72183e-06	0.0302595	0.0303021	0.00101636	4.54621e-05	0.00024148	0.514981	0.0189869	0.0182566
C6	0.0231315	0.00483604	0.0167159	0.911037	4.86444e-05	4.06185	3.47367e-05	0.0290845	4.03312e-06	0.477175	0.48318	2.86733e-06	4.41757e-06	0.037152	0.00573392	0.00716602	0.00038225	0.000262634	2.52879e-05
C7	0.00287303	0.0203236	0.00123217	0.000153015	0.922031	3.47367e-05	4.08048	5.29534e-05	0.0291848	4.90485e-06	1.47583e-06	0.480582	0.483513	0.00057028	2.11823e-05	0.000203824	0.037436	0.00930905	0.00639032
H8	0.00157541	0.00840724	0.000613634	0.472166	3.91327e-05	0.0290845	5.29534e-05	0.406307	3.02946e-06	0.00648199	0.00364911	2.30238e-06	2.79442e-06	0.0198651	0.00235102	0.00391487	0.000746362	0.000100277	4.65439e-05
H9	0.00026099	0.00673123	0.000273125	8.93689e-06	0.473157	4.03312e-06	0.0291848	3.02946e-06	0.409878	4.42726e-07	2.52409e-07	0.00673992	0.00362707	2.33375e-05	1.20561e-05	3.89012e-06	0.0198167	0.0015533	0.00508909
H10	0.00105387	0.000392022	0.00536375	0.028789	5.0459e-06	0.477175	4.90485e-06	0.00648199	4.42726e-07	0.398972	0.0163241	2.4481e-07	3.45679e-07	0.00576985	0.000398401	0.00271877	4.05773e-05	1.27377e-05	3.0567e-06
H11	0.00126051	0.000222853	0.00067649	0.0300564	2.72183e-06	0.48318	1.47583e-06	0.00364911	2.52409e-07	0.0163241	0.40878	1.40364e-07	2.21643e-07	0.00633874	0.000839716	0.000448688	1.96382e-05	1.34095e-05	1.88124e-06
H12	0.000141834	0.00124492	6.71307e-05	6.95797e-06	0.0302595	2.86733e-06	0.480582	2.30238e-06	0.00673992	2.4481e-07	1.40364e-07	0.40956	0.0166987	3.06232e-05	2.92525e-06	8.55187e-06	0.00636604	0.000521225	0.00413071
H13	0.00028575	0.00115915	7.28535e-05	9.67129e-06	0.0303021	4.41757e-06	0.483513	2.79442e-06	0.00362707	3.45679e-07	2.21643e-07	0.0166987	0.409098	8.76009e-05	2.19582e-06	2.13167e-05	0.00637209	0.000782401	0.000472045
C14	0.457688	0.0337898	0.0625923	0.519639	0.00101636	0.037152	0.00057028	0.0198651	2.33375e-05	0.00576985	0.00633874	3.06232e-05	8.76009e-05	4.06389	0.467637	0.462754	0.00554553	0.000718786	0.000268383
H15	0.0207437	0.00810618	0.00808699	0.0176378	4.54621e-05	0.00573392	2.11823e-05	0.00235102	1.20561e-05	0.000398401	0.000839716	2.92525e-06	2.19582e-06	0.467637	0.393079	0.014566	0.00033801	2.74951e-05	0.000132292
H16	0.0232906	0.00654091	0.00484859	0.0182486	0.00024148	0.00716602	0.000203824	0.00391487	3.89012e-06	0.00271877	0.000448688	8.55187e-06	2.13167e-05	0.462754	0.014566	0.389656	0.00101928	6.82827e-05	5.88802e-05
C17	0.0262348	0.532275	0.00402497	0.00136173	0.514981	0.00038225	0.037436	0.000746362	0.0198167	4.05773e-05	1.96382e-05	0.00636604	0.00637209	0.00554553	0.00033801	0.00101928	4.00999	0.461166	0.464766
H18	0.0124659	0.0281291	0.00150641	0.000266223	0.0189869	0.000262634	0.00930905	0.000100277	0.0015533	1.27377e-05	1.34095e-05	0.000521225	0.000782401	0.000718786	2.74951e-05	6.82827e-05	0.461166	0.392182	0.0147029
H19	0.00156244	0.0295558	0.00156371	6.52471e-05	0.0182566	2.52879e-05	0.00639032	4.65439e-05	0.00508909	3.0567e-06	1.88124e-06	0.00413071	0.000472045	0.000268383	0.000132292	5.88802e-05	0.464766	0.0147029	0.391963
Total	14.7551	16.1078	9.22383	6.03453	6.03568	6.05782	6.0744	0.95541	0.956367	0.943507	0.951816	0.956366	0.952512	6.14537	0.939761	0.935779	6.09288	0.942775	0.939055	86.0007
LDM — alliciin_conf_39_LIDI_matrix
	S1	S2	O3	C4	C5	C6	C7	H8	H9	H10	H11	H12	H13	C14	H15	H16	C17	H18	H19
S1	12.9435	0.515171	0.698837	0.026601	0.00652881	0.0151448	0.00303138	0.00368294	0.000418091	0.000951175	0.00100224	0.000319397	0.000147971	0.466987	0.0235533	0.0244546	0.0232516	0.00591383	0.00180894		64.1537	21.8473	86
S2	0.515171	14.7404	0.0993924	0.020231	0.0443929	0.0157806	0.0203072	0.0011247	0.00721268	0.00293009	0.000441521	0.00118206	0.00125262	0.0340065	0.0063247	0.0102173	0.533301	0.0260076	0.0304611
O3	0.698837	0.0993924	8.29892	0.00906191	0.00174981	0.00520369	0.00136744	0.000625216	0.000142604	0.000305792	0.000581646	0.000105883	6.50356e-05	0.0619369	0.00503433	0.00629463	0.0129806	0.020169	0.000628297
C4	0.026601	0.020231	0.00906191	3.9813	0.00015276	0.915109	0.000161753	0.474067	9.64118e-06	0.0298192	0.0299184	1.17591e-05	7.95852e-06	0.52007	0.0186765	0.0168226	0.0017817	0.00018809	9.86858e-05
C5	0.00652881	0.0443929	0.00174981	0.00015276	3.97261	7.17432e-05	0.92187	8.62457e-06	0.472376	1.26211e-05	2.62449e-06	0.0303782	0.0304879	0.000749568	0.000273242	5.4743e-05	0.514866	0.0179252	0.0186223
C6	0.0151448	0.0157806	0.00520369	0.915109	7.17432e-05	4.06688	7.24695e-05	0.0292981	7.65395e-06	0.479172	0.482572	3.41896e-06	4.47641e-06	0.0376067	0.00990058	0.00589211	0.0010656	0.000253925	7.52285e-05
C7	0.00303138	0.0203072	0.00136744	0.000161753	0.92187	7.24695e-05	4.08325	5.74156e-06	0.0289205	4.96654e-06	1.53157e-06	0.48386	0.4813	0.000469293	0.000204717	3.7202e-05	0.0376181	0.00887644	0.00644951
H8	0.00368294	0.0011247	0.000625216	0.474067	8.62457e-06	0.0292981	5.74156e-06	0.409816	1.06194e-06	0.00667545	0.00366899	3.76526e-07	3.44153e-07	0.0200507	0.00130238	0.00505969	4.59461e-05	8.85012e-06	8.58024e-06
H9	0.000418091	0.00721268	0.000142604	9.64118e-06	0.472376	7.65395e-06	0.0289205	1.06194e-06	0.406416	4.39279e-06	4.75369e-07	0.00361426	0.0067416	3.68823e-05	4.37492e-06	1.48222e-05	0.0196288	0.00149943	0.00511721
H10	0.000951175	0.00293009	0.000305792	0.0298192	1.26211e-05	0.479172	4.96654e-06	0.00667545	4.39279e-06	0.404863	0.0164287	2.76083e-07	7.11963e-07	0.00623692	0.000486871	0.003693	0.000169054	1.10149e-05	4.85128e-05
H11	0.00100224	0.000441521	0.000581646	0.0299184	2.62449e-06	0.482572	1.53157e-06	0.00366899	4.75369e-07	0.0164287	0.405863	6.74054e-08	1.27023e-07	0.00630534	0.000757381	0.000414091	2.32977e-05	9.75353e-06	2.5368e-06
H12	0.000319397	0.00118206	0.000105883	1.17591e-05	0.0303782	3.41896e-06	0.48386	3.76526e-07	0.00361426	2.76083e-07	6.74054e-08	0.410331	0.0168519	5.90273e-05	2.332e-05	2.50651e-06	0.00640279	0.000729573	0.000480531
H13	0.000147971	0.00125262	6.50356e-05	7.95852e-06	0.0304879	4.47641e-06	0.4813	3.44153e-07	0.0067416	7.11963e-07	1.27023e-07	0.0168519	0.413219	2.57578e-05	8.91036e-06	3.04628e-06	0.00639327	0.00050602	0.00422355
C14	0.466987	0.0340065	0.0619369	0.52007	0.000749568	0.0376067	0.000469293	0.0200507	3.68823e-05	0.00623692	0.00630534	5.90273e-05	2.57578e-05	4.06871	0.462114	0.458889	0.00426371	0.000517802	0.000369412
H15	0.0235533	0.0063247	0.00503433	0.0186765	0.000273242	0.00990058	0.000204717	0.00130238	4.37492e-06	0.000486871	0.000757381	2.332e-05	8.91036e-06	0.462114	0.388607	0.0139924	0.00101443	9.48812e-05	5.59844e-05
H16	0.0244546	0.0102173	0.00629463	0.0168226	5.4743e-05	0.00589211	3.7202e-05	0.00505969	1.48222e-05	0.003693	0.000414091	2.50651e-06	3.04628e-06	0.458889	0.0139924	0.375676	0.000365512	3.46387e-05	0.000150321
C17	0.0232516	0.533301	0.0129806	0.0017817	0.514866	0.0010656	0.0376181	4.59461e-05	0.0196288	0.000169054	2.32977e-05	0.00640279	0.00639327	0.00426371	0.00101443	0.000365512	4.02315	0.449845	0.467224
H18	0.00591383	0.0260076	0.020169	0.00018809	0.0179252	0.000253925	0.00887644	8.85012e-06	0.00149943	1.10149e-05	9.75353e-06	0.000729573	0.00050602	0.000517802	9.48812e-05	3.46387e-05	0.449845	0.35753	0.0140277
H19	0.00180894	0.0304611	0.000628297	9.86858e-05	0.0186223	7.52285e-05	0.00644951	8.58024e-06	0.00511721	4.85128e-05	2.5368e-06	0.000480531	0.00422355	0.000369412	5.59844e-05	0.000150321	0.467224	0.0140277	0.402701
Total	14.7613	16.1101	9.2234	6.04409	6.03313	6.06412	6.07781	0.955451	0.952166	0.951814	0.947994	0.954356	0.96124	6.1494	0.932429	0.922068	6.10339	0.904148	0.952554	86.001
LDM — alliciin_conf_40_LIDI_matrix
	S1	S2	O3	C4	C5	C6	C7	H8	H9	H10	H11	H12	H13	C14	H15	H16	C17	H18	H19
S1	12.9434	0.515132	0.69877	0.0265862	0.00652812	0.0151447	0.00303125	0.00368239	0.000418063	0.000951125	0.00100232	0.00031936	0.000147959	0.467021	0.0244348	0.0235551	0.0232433	0.00180827	0.00590939		64.153	21.8457	86
S2	0.515132	14.7404	0.0993853	0.0202456	0.0443877	0.0157808	0.020308	0.00112468	0.00721277	0.00293011	0.000441525	0.00118211	0.00125266	0.0340084	0.0102165	0.00632489	0.533142	0.0304621	0.0260065
O3	0.69877	0.0993853	8.29893	0.00905948	0.00175115	0.00520365	0.0013675	0.00062522	0.000142637	0.0003058	0.000581639	0.000105901	6.50416e-05	0.0619414	0.00629472	0.00503422	0.0129972	0.000628808	0.0201676
C4	0.0265862	0.0202456	0.00905948	3.98127	0.000152868	0.915119	0.000161876	0.474043	9.65467e-06	0.0298305	0.0299187	1.1765e-05	7.96469e-06	0.520125	0.0168359	0.0186777	0.00178266	9.87907e-05	0.000188258
C5	0.00652812	0.0443877	0.00175115	0.000152868	3.97246	7.18024e-05	0.921789	8.62353e-06	0.472343	1.261e-05	2.62617e-06	0.0303647	0.030438	0.000749448	5.47013e-05	0.000273257	0.5147	0.0185707	0.0179173
C6	0.0151447	0.0157808	0.00520365	0.915119	7.18024e-05	4.06683	7.24644e-05	0.029296	7.65502e-06	0.47918	0.482552	3.41912e-06	4.47636e-06	0.0376254	0.0058944	0.00990051	0.0010656	7.52496e-05	0.000253904
C7	0.00303125	0.020308	0.0013675	0.000161876	0.921789	7.24644e-05	4.08323	5.74223e-06	0.0289165	4.96878e-06	1.53145e-06	0.483839	0.4813	0.000469228	3.7208e-05	0.000204724	0.0375886	0.00645243	0.00887644
H8	0.00368239	0.00112468	0.00062522	0.474043	8.62353e-06	0.029296	5.74223e-06	0.409819	1.06201e-06	0.00667546	0.00366903	3.76584e-07	3.44149e-07	0.020079	0.00505963	0.00130251	4.59263e-05	8.58022e-06	8.84894e-06
H9	0.000418063	0.00721277	0.000142637	9.65467e-06	0.472343	7.65502e-06	0.0289165	1.06201e-06	0.406417	4.39301e-06	4.75419e-07	0.00361435	0.00674162	3.68911e-05	1.48185e-05	4.37524e-06	0.0196013	0.00511725	0.00149929
H10	0.000951125	0.00293011	0.0003058	0.0298305	1.261e-05	0.47918	4.96878e-06	0.00667546	4.39301e-06	0.404861	0.0164287	2.76061e-07	7.12015e-07	0.00624304	0.00369288	0.000486882	0.000168975	4.85126e-05	1.10132e-05
H11	0.00100232	0.000441525	0.000581639	0.0299187	2.62617e-06	0.482552	1.53145e-06	0.00366903	4.75419e-07	0.0164287	0.405867	6.76381e-08	1.27046e-07	0.00630627	0.000414063	0.000757406	2.32906e-05	2.53679e-06	9.75265e-06
H12	0.00031936	0.00118211	0.000105901	1.1765e-05	0.0303647	3.41912e-06	0.483839	3.76584e-07	0.00361435	2.76061e-07	6.76381e-08	0.410325	0.0168519	5.9017e-05	2.50649e-06	2.33207e-05	0.00640084	0.000480573	0.000729566
H13	0.000147959	0.00125266	6.50416e-05	7.96469e-06	0.030438	4.47636e-06	0.4813	3.44149e-07	0.00674162	7.12015e-07	1.27046e-07	0.0168519	0.413217	2.57552e-05	3.04595e-06	8.91057e-06	0.00638278	0.00422365	0.000506008
C14	0.467021	0.0340084	0.0619414	0.520125	0.000749448	0.0376254	0.000469228	0.020079	3.68911e-05	0.00624304	0.00630627	5.9017e-05	2.57552e-05	4.06859	0.458888	0.462067	0.00426294	0.000369493	0.000517749
H15	0.0244348	0.0102165	0.00629472	0.0168359	5.47013e-05	0.0058944	3.7208e-05	0.00505963	1.48185e-05	0.00369288	0.000414063	2.50649e-06	3.04595e-06	0.458888	0.375676	0.0139923	0.000365183	0.000150282	3.46107e-05
H16	0.0235551	0.00632489	0.00503422	0.0186777	0.000273257	0.00990051	0.000204724	0.00130251	4.37524e-06	0.000486882	0.000757406	2.33207e-05	8.91057e-06	0.462067	0.0139923	0.388608	0.00101447	5.59869e-05	9.48707e-05
C17	0.0232433	0.533142	0.0129972	0.00178266	0.5147	0.0010656	0.0375886	4.59263e-05	0.0196013	0.000168975	2.32906e-05	0.00640084	0.00638278	0.00426294	0.000365183	0.00101447	4.02285	0.467129	0.449854
H18	0.00180827	0.0304621	0.000628808	9.87907e-05	0.0185707	7.52496e-05	0.00645243	8.58022e-06	0.00511725	4.85126e-05	2.53679e-06	0.000480573	0.00422365	0.000369493	0.000150282	5.59869e-05	0.467129	0.4027	0.0140277
H19	0.00590939	0.0260065	0.0201676	0.000188258	0.0179173	0.000253904	0.00887644	8.84894e-06	0.00149929	1.10132e-05	9.75265e-06	0.000729566	0.000506008	0.000517749	3.46107e-05	9.48707e-05	0.449854	0.0140277	0.357528
Total	14.7611	16.1099	9.22336	6.04413	6.03257	6.06408	6.07766	0.955455	0.952103	0.951837	0.947979	0.954314	0.961178	6.14938	0.922061	0.932386	6.10261	0.95241	0.904141	85.9987
LDM — alliciin_conf_41_LIDI_matrix
	S1	S2	O3	C4	C5	C6	C7	H8	H9	H10	H11	H12	H13	C14	H15	H16	C17	H18	H19
S1	12.9045	0.526886	0.702189	0.0288156	0.0120511	0.0158945	0.00795349	0.00371315	0.000606007	0.000908845	0.000886426	0.000247339	0.00104138	0.460457	0.0232835	0.0224167	0.0241013	0.00408307	0.00557939		64.1201	21.8816	86
S2	0.526886	14.7303	0.103568	0.0137559	0.0385755	0.0127488	0.0204218	0.00070806	0.00744827	0.000343189	0.00386987	0.00153723	0.00132337	0.0359174	0.0120118	0.00579036	0.535833	0.029964	0.027369
O3	0.702189	0.103568	8.30924	0.0086533	0.0071792	0.0052136	0.00431998	0.000564323	0.00100602	0.000575341	0.000337433	0.000190858	0.000196175	0.0640731	0.00393918	0.00848159	0.00356377	0.00060382	0.0015077
C4	0.0288156	0.0137559	0.0086533	3.97778	0.000157419	0.91915	8.74813e-05	0.474454	2.31302e-05	0.0301819	0.0297776	6.37454e-06	8.00683e-06	0.520338	0.0174539	0.0184126	0.000476917	0.000102323	6.60812e-05
C5	0.0120511	0.0385755	0.0071792	0.000157419	3.97072	0.000165428	0.917146	7.98353e-06	0.471031	5.15229e-06	6.66112e-05	0.0299719	0.0305704	0.000948876	0.000153654	0.000110016	0.51535	0.0184876	0.019063
C6	0.0158945	0.0127488	0.0052136	0.91915	0.000165428	4.06913	7.69775e-05	0.0297529	1.42701e-05	0.483135	0.479032	5.89087e-06	1.01143e-05	0.0374073	0.00581439	0.00895442	0.000521686	9.96563e-05	0.000137294
C7	0.00795349	0.0204218	0.00431998	8.74813e-05	0.917146	7.69775e-05	4.07729	9.37592e-06	0.0282062	3.37575e-06	5.52632e-05	0.482936	0.481159	0.000442482	0.000206307	6.09222e-05	0.0373487	0.0065924	0.0102983
H8	0.00371315	0.00070806	0.000564323	0.474454	7.98353e-06	0.0297529	9.37592e-06	0.413187	1.12617e-06	0.00371979	0.00674048	5.40638e-07	1.24626e-06	0.0201248	0.00497181	0.00163292	2.98139e-05	1.10567e-05	4.49177e-06
H9	0.000606007	0.00744827	0.00100602	2.31302e-05	0.471031	1.42701e-05	0.0282062	1.12617e-06	0.401642	3.94044e-07	2.78668e-06	0.00357031	0.00670001	5.30094e-05	9.26544e-06	7.65339e-06	0.0195781	0.00517324	0.00112622
H10	0.000908845	0.000343189	0.000575341	0.0301819	5.15229e-06	0.483135	3.37575e-06	0.00371979	3.94044e-07	0.408426	0.0165545	2.44263e-07	5.21038e-07	0.00631231	0.000409555	0.000756245	2.28484e-05	3.0618e-06	5.74666e-06
H11	0.000886426	0.00386987	0.000337433	0.0297776	6.66112e-05	0.479032	5.52632e-05	0.00674048	2.78668e-06	0.0165545	0.406359	5.02357e-06	2.88534e-06	0.00607419	0.00345379	0.000484209	0.000222421	8.52063e-06	9.51698e-06
H12	0.000247339	0.00153723	0.000190858	6.37454e-06	0.0299719	5.89087e-06	0.482936	5.40638e-07	0.00357031	2.44263e-07	5.02357e-06	0.406679	0.0167794	1.89612e-05	1.19394e-05	2.78791e-06	0.00631905	0.000485638	0.000768013
H13	0.00104138	0.00132337	0.000196175	8.00683e-06	0.0305704	1.01143e-05	0.481159	1.24626e-06	0.00670001	5.21038e-07	2.88534e-06	0.0167794	0.415222	6.68117e-05	1.8556e-05	3.89283e-06	0.00647771	0.0045129	0.000509927
C14	0.460457	0.0359174	0.0640731	0.520338	0.000948876	0.0374073	0.000442482	0.0201248	5.30094e-05	0.00631231	0.00607419	1.89612e-05	6.68117e-05	4.06187	0.46175	0.460611	0.00543189	0.000331824	0.00101884
H15	0.0232835	0.0120118	0.00393918	0.0174539	0.000153654	0.00581439	0.000206307	0.00497181	9.26544e-06	0.000409555	0.00345379	1.19394e-05	1.8556e-05	0.46175	0.385962	0.0142297	0.000936396	0.000114166	5.75157e-05
H16	0.0224167	0.00579036	0.00848159	0.0184126	0.000110016	0.00895442	6.09222e-05	0.00163292	7.65339e-06	0.000756245	0.000484209	2.78791e-06	3.89283e-06	0.460611	0.0142297	0.382601	0.00110452	4.35099e-05	0.000266998
C17	0.0241013	0.535833	0.00356377	0.000476917	0.51535	0.000521686	0.0373487	2.98139e-05	0.0195781	2.28484e-05	0.000222421	0.00631905	0.00647771	0.00543189	0.000936396	0.00110452	4.00863	0.464543	0.46302
H18	0.00408307	0.029964	0.00060382	0.000102323	0.0184876	9.96563e-05	0.0065924	1.10567e-05	0.00517324	3.0618e-06	8.52063e-06	0.000485638	0.0045129	0.000331824	0.000114166	4.35099e-05	0.464543	0.39782	0.0147985
H19	0.00557939	0.027369	0.0015077	6.60812e-05	0.019063	0.000137294	0.0102983	4.49177e-06	0.00112622	5.74666e-06	9.51698e-06	0.000768013	0.000509927	0.00101884	5.75157e-05	0.000266998	0.46302	0.0147985	0.392746
Total	14.7456	16.1084	9.2254	6.0397	6.03176	6.06726	6.07461	0.959635	0.946199	0.951364	0.953943	0.949536	0.964605	6.14325	0.934788	0.925971	6.09351	0.947778	0.938352	86.0016
LDM — alliciin_conf_42_LIDI_matrix
	S1	S2	O3	C4	C5	C6	C7	H8	H9	H10	H11	H12	H13	C14	H15	H16	C17	H18	H19
S1	12.9219	0.520667	0.70072	0.0325465	0.00488117	0.0195151	0.000895007	0.00225677	0.00594326	0.000920164	0.000996493	0.000263515	9.82021e-05	0.461355	0.0199907	0.0247225	0.0237698	0.00583162	0.00571204		64.1533	21.8473	86
S2	0.520667	14.7613	0.102574	0.00683431	0.0436545	0.00338369	0.0210478	0.000511116	0.0046614	0.000247694	0.000309578	0.00102444	0.00151712	0.0385971	0.0111245	0.0094742	0.535773	0.0281689	0.0266784
O3	0.70072	0.102574	8.29562	0.0108858	0.000820148	0.00983149	0.000370793	0.000421295	0.000497634	0.00230276	0.00037287	4.36191e-05	3.99016e-05	0.0616911	0.00797661	0.00667096	0.00912626	0.0130831	0.00114626
C4	0.0325465	0.00683431	0.0108858	3.98152	7.47384e-05	0.91742	9.16827e-05	0.47545	2.86896e-05	0.0293487	0.0300635	1.02507e-05	1.11103e-05	0.518337	0.017978	0.0175012	0.00132967	9.60929e-05	0.000292804
C5	0.00488117	0.0436545	0.000820148	7.47384e-05	3.97126	4.28468e-05	0.924442	9.93636e-06	0.471822	3.03776e-06	3.95693e-06	0.0306935	0.0304719	0.000542405	6.41971e-05	0.000174147	0.515901	0.0182852	0.0181563
C6	0.0195151	0.00338369	0.00983149	0.91742	4.28468e-05	4.0673	2.16966e-05	0.029729	4.95895e-05	0.478209	0.482943	7.98517e-06	5.23593e-06	0.0376586	0.00720235	0.00657809	0.000589346	9.81786e-05	0.000237517
C7	0.000895007	0.0210478	0.000370793	9.16827e-05	0.924442	2.16966e-05	4.08309	8.84477e-06	0.0291662	2.5769e-06	5.2952e-06	0.481559	0.483909	0.000371389	5.63272e-05	0.000105003	0.0371589	0.00905261	0.00646408
H8	0.00225677	0.000511116	0.000421295	0.47545	9.93636e-06	0.029729	8.84477e-06	0.413429	2.28201e-06	0.00667751	0.00367275	5.66567e-07	9.80597e-07	0.0201676	0.00211151	0.00444896	4.90576e-05	5.34693e-06	7.24747e-06
H9	0.00594326	0.0046614	0.000497634	2.86896e-05	0.471822	4.95895e-05	0.0291662	2.28201e-06	0.410397	2.61154e-06	2.91378e-06	0.00673829	0.0036572	0.000471448	1.51493e-05	9.27641e-05	0.0195373	0.00105045	0.00514359
H10	0.000920164	0.000247694	0.00230276	0.0293487	3.03776e-06	0.478209	2.5769e-06	0.00667751	2.61154e-06	0.400355	0.0163483	3.74659e-07	3.42423e-07	0.00611826	0.000437491	0.0033189	3.34596e-05	6.2949e-06	1.04123e-05
H11	0.000996493	0.000309578	0.00037287	0.0300635	3.95693e-06	0.482943	5.2952e-06	0.00367275	2.91378e-06	0.0163483	0.407391	7.16356e-07	6.64976e-07	0.00633682	0.000802026	0.000432096	8.21024e-05	4.58334e-06	2.0632e-05
H12	0.000263515	0.00102444	4.36191e-05	1.02507e-05	0.0306935	7.98517e-06	0.481559	5.66567e-07	0.00673829	3.74659e-07	7.16356e-07	0.415676	0.016934	4.79221e-05	3.10803e-06	5.60678e-06	0.0064162	0.000435001	0.00433768
H13	9.82021e-05	0.00151712	3.99016e-05	1.11103e-05	0.0304719	5.23593e-06	0.483909	9.80597e-07	0.0036572	3.42423e-07	6.64976e-07	0.016934	0.410752	4.46104e-05	3.8926e-06	9.00404e-06	0.00632746	0.000731705	0.000483019
C14	0.461355	0.0385971	0.0616911	0.518337	0.000542405	0.0376586	0.000371389	0.0201676	0.000471448	0.00611826	0.00633682	4.79221e-05	4.46104e-05	4.06883	0.464973	0.458804	0.00511978	0.000525488	0.00078607
H15	0.0199907	0.0111245	0.00797661	0.017978	6.41971e-05	0.00720235	5.63272e-05	0.00211151	1.51493e-05	0.000437491	0.000802026	3.10803e-06	3.8926e-06	0.464973	0.389985	0.0140466	0.000910722	0.000156538	6.32764e-05
H16	0.0247225	0.0094742	0.00667096	0.0175012	0.000174147	0.00657809	0.000105003	0.00444896	9.27641e-05	0.0033189	0.000432096	5.60678e-06	9.00404e-06	0.458804	0.0140466	0.374353	0.000438887	4.26414e-05	1.94012e-05
C17	0.0237698	0.535773	0.00912626	0.00132967	0.515901	0.000589346	0.0371589	4.90576e-05	0.0195373	3.34596e-05	8.21024e-05	0.0064162	0.00632746	0.00511978	0.000910722	0.000438887	4.02048	0.454462	0.463965
H18	0.00583162	0.0281689	0.0130831	9.60929e-05	0.0182852	9.81786e-05	0.00905261	5.34693e-06	0.00105045	6.2949e-06	4.58334e-06	0.000435001	0.000731705	0.000525488	0.000156538	4.26414e-05	0.454462	0.366863	0.0139731
H19	0.00571204	0.0266784	0.00114626	0.000292804	0.0181563	0.000237517	0.00646408	7.24747e-06	0.00514359	1.04123e-05	2.0632e-05	0.00433768	0.000483019	0.00078607	6.32764e-05	1.94012e-05	0.463965	0.0139731	0.392884
Total	14.7529	16.1175	9.22419	6.03982	6.03131	6.06082	6.07782	0.95896	0.959279	0.944344	0.94979	0.964198	0.954998	6.15077	0.9379	0.921238	6.10147	0.912872	0.940381	86.0006
LDM — alliciin_conf_43_LIDI_matrix
	S1	S2	O3	C4	C5	C6	C7	H8	H9	H10	H11	H12	H13	C14	H15	H16	C17	H18	H19
S1	12.9383	0.516972	0.699073	0.0265604	0.00418787	0.0149873	0.000846619	0.00376633	0.00482796	0.000947961	0.000999603	9.50027e-05	0.00024597	0.466691	0.0235901	0.0243708	0.0236681	0.0057276	0.00597059		64.1467	21.8547	86
S2	0.516972	14.7392	0.100712	0.0201941	0.04384	0.0154383	0.020978	0.00115166	0.00472545	0.002714	0.000433203	0.00150761	0.0010373	0.0340345	0.00633269	0.0101732	0.535631	0.0272196	0.0271945
O3	0.699073	0.100712	8.29909	0.00903009	0.000960404	0.0051414	0.00043133	0.000628666	0.000451547	0.000302666	0.000580349	4.55206e-05	5.32385e-05	0.0618372	0.00504569	0.00616021	0.0129705	0.0193589	0.00139533
C4	0.0265604	0.0201941	0.00903009	3.98082	0.000127041	0.915341	0.00013207	0.473953	2.2094e-05	0.0298852	0.0299171	9.97819e-06	6.74869e-06	0.520005	0.0186694	0.0168329	0.00176294	0.000197794	0.000120061
C5	0.00418787	0.04384	0.000960404	0.000127041	3.97035	0.000105615	0.924372	1.0087e-05	0.472251	4.69031e-05	3.45468e-06	0.0305132	0.0307389	0.000512826	7.43246e-05	0.000161541	0.516159	0.0179686	0.0182671
C6	0.0149873	0.0154383	0.0051414	0.915341	0.000105615	4.06681	8.04745e-05	0.0292644	3.0828e-05	0.479279	0.482526	5.70724e-06	4.62266e-06	0.0376174	0.00997498	0.00588246	0.00102522	0.000262749	3.18854e-05
C7	0.000846619	0.020978	0.00043133	0.00013207	0.924372	8.04745e-05	4.08386	5.05199e-06	0.0292825	3.52144e-05	2.41483e-06	0.484047	0.481701	0.000386141	8.60374e-05	8.4447e-05	0.0371425	0.00888607	0.00647926
H8	0.00376633	0.00115166	0.000628666	0.473953	1.0087e-05	0.0292644	5.05199e-06	0.409605	5.45824e-06	0.00667538	0.00366781	4.49255e-07	3.58465e-07	0.0200608	0.00127581	0.00506514	4.458e-05	9.24457e-06	6.46659e-06
H9	0.00482796	0.00472545	0.000451547	2.2094e-05	0.472251	3.0828e-05	0.0292825	5.45824e-06	0.412004	2.44626e-06	1.70244e-06	0.00367273	0.00677655	0.000386517	1.72624e-05	7.86771e-05	0.0195821	0.0010436	0.00516584
H10	0.000947961	0.002714	0.000302666	0.0298852	4.69031e-05	0.479279	3.52144e-05	0.00667538	2.44626e-06	0.405294	0.0164385	3.28603e-06	1.6034e-06	0.00624501	0.000487183	0.00370559	0.000149758	1.0455e-05	4.4214e-06
H11	0.000999603	0.000433203	0.000580349	0.0299171	3.45468e-06	0.482526	2.41483e-06	0.00366781	1.70244e-06	0.0164385	0.405741	1.64001e-07	2.01899e-07	0.00630413	0.00075438	0.000414784	2.2236e-05	9.86144e-06	1.45595e-06
H12	9.50027e-05	0.00150761	4.55206e-05	9.97819e-06	0.0305132	5.70724e-06	0.484047	4.49255e-07	0.00367273	3.28603e-06	1.64001e-07	0.411496	0.016978	4.5392e-05	1.15396e-05	7.30075e-06	0.00633234	0.00071548	0.000483184
H13	0.00024597	0.0010373	5.32385e-05	6.74869e-06	0.0307389	4.62266e-06	0.481701	3.58465e-07	0.00677655	1.6034e-06	2.01899e-07	0.016978	0.416308	4.31887e-05	8.90266e-06	4.93951e-06	0.00641361	0.000426732	0.00435372
C14	0.466691	0.0340345	0.0618372	0.520005	0.000512826	0.0376174	0.000386141	0.0200608	0.000386517	0.00624501	0.00630413	4.5392e-05	4.31887e-05	4.06865	0.461897	0.458832	0.0043786	0.000511246	0.000696722
H15	0.0235901	0.00633269	0.00504569	0.0186694	7.43246e-05	0.00997498	8.60374e-05	0.00127581	1.72624e-05	0.000487183	0.00075438	1.15396e-05	8.90266e-06	0.461897	0.388185	0.0139829	0.00107984	9.60276e-05	0.000277749
H16	0.0243708	0.0101732	0.00616021	0.0168329	0.000161541	0.00588246	8.4447e-05	0.00506514	7.86771e-05	0.00370559	0.000414784	7.30075e-06	4.93951e-06	0.458832	0.0139829	0.375647	0.000343957	3.37798e-05	4.10505e-05
C17	0.0236681	0.535631	0.0129705	0.00176294	0.516159	0.00102522	0.0371425	4.458e-05	0.0195821	0.000149758	2.2236e-05	0.00633234	0.00641361	0.0043786	0.00107984	0.000343957	4.02468	0.450076	0.464026
H18	0.0057276	0.0272196	0.0193589	0.000197794	0.0179686	0.000262749	0.00888607	9.24457e-06	0.0010436	1.0455e-05	9.86144e-06	0.00071548	0.000426732	0.000511246	9.60276e-05	3.37798e-05	0.450076	0.356964	0.0136496
H19	0.00597059	0.0271945	0.00139533	0.000120061	0.0182671	3.18854e-05	0.00647926	6.46659e-06	0.00516584	4.4214e-06	1.45595e-06	0.000483184	0.00435372	0.000696722	0.000277749	4.10505e-05	0.464026	0.0136496	0.393728
Total	14.7618	16.1095	9.22327	6.04359	6.03065	6.06381	6.07884	0.955195	0.960328	0.952228	0.947819	0.95597	0.965103	6.14913	0.931847	0.921823	6.10549	0.903168	0.941893	86.0015
LDM — alliciin_conf_44_LIDI_matrix
	S1	S2	O3	C4	C5	C6	C7	H8	H9	H10	H11	H12	H13	C14	H15	H16	C17	H18	H19
S1	12.9282	0.518769	0.700552	0.0325816	0.00637293	0.0196315	0.00285402	0.00220822	0.000437203	0.000927599	0.000996321	0.000297848	0.000141837	0.461919	0.0200055	0.0247916	0.0236771	0.00220229	0.00608407		64.1636	21.8377	86
S2	0.518769	14.7645	0.101387	0.00679167	0.0435276	0.00338282	0.0200853	0.00051458	0.00705939	0.000252797	0.000306324	0.00116916	0.00122512	0.0385845	0.0109339	0.00966268	0.53373	0.0303312	0.0270716
O3	0.700552	0.101387	8.29552	0.0108349	0.00150405	0.0100146	0.0011853	0.000426965	0.000130933	0.00245346	0.000386081	8.44457e-05	5.53148e-05	0.0618176	0.0080022	0.00676213	0.00933802	0.000550423	0.0139268
C4	0.0325816	0.00679167	0.0108349	3.98172	0.00028588	0.917217	0.000235741	0.475546	6.64306e-06	0.0292853	0.0300667	2.46761e-05	1.02545e-05	0.518339	0.0179989	0.0174629	0.00126731	5.36546e-05	9.88639e-05
C5	0.00637293	0.0435276	0.00150405	0.00028588	3.97396	0.000230669	0.922225	9.25098e-06	0.472296	1.04882e-05	1.98759e-05	0.0303282	0.0304882	0.000840791	7.88593e-05	4.01849e-05	0.514808	0.0185043	0.0182915
C6	0.0196315	0.00338282	0.0100146	0.917217	0.000230669	4.06737	0.000135878	0.0297492	3.83075e-06	0.47812	0.482985	1.90298e-05	6.52192e-06	0.0376284	0.00711176	0.0065987	0.000553379	2.34928e-05	9.86256e-05
C7	0.00285402	0.0200853	0.0011853	0.000235741	0.922225	0.000135878	4.08217	7.70674e-06	0.0288782	8.27443e-06	1.85676e-05	0.483626	0.481208	0.000533119	9.4056e-05	2.83062e-05	0.037645	0.00645018	0.00907118
H8	0.00220822	0.00051458	0.000426965	0.475546	9.25098e-06	0.0297492	7.70674e-06	0.413496	8.20488e-07	0.00667571	0.00367295	7.0588e-07	4.45337e-07	0.0201823	0.00213929	0.0044118	4.93137e-05	9.1181e-06	5.53851e-06
H9	0.000437203	0.00705939	0.000130933	6.64306e-06	0.472296	3.83075e-06	0.0288782	8.20488e-07	0.40541	2.40786e-07	2.70293e-07	0.00360682	0.00672632	3.45981e-05	5.85132e-06	1.22945e-05	0.0195794	0.00509755	0.00149876
H10	0.000927599	0.000252797	0.00245346	0.0292853	1.04882e-05	0.47812	8.27443e-06	0.00667571	2.40786e-07	0.400162	0.0163481	9.20378e-07	3.70675e-07	0.00609799	0.000435713	0.00328399	3.173e-05	1.9463e-06	6.31858e-06
H11	0.000996321	0.000306324	0.000386081	0.0300667	1.98759e-05	0.482985	1.85676e-05	0.00367295	2.70293e-07	0.0163481	0.407578	1.93276e-06	8.00729e-07	0.00633797	0.000805777	0.000431858	7.73673e-05	2.17381e-06	4.41447e-06
H12	0.000297848	0.00116916	8.44457e-05	2.46761e-05	0.0303282	1.90298e-05	0.483626	7.0588e-07	0.00360682	9.20378e-07	1.93276e-06	0.40936	0.0168081	6.55224e-05	6.13734e-06	1.81172e-06	0.00639464	0.000479213	0.000748939
H13	0.000141837	0.00122512	5.53148e-05	1.02545e-05	0.0304882	6.52192e-06	0.481208	4.45337e-07	0.00672632	3.70675e-07	8.00729e-07	0.0168081	0.412798	2.84822e-05	4.25491e-06	2.52849e-06	0.00638179	0.00421342	0.000514894
C14	0.461919	0.0385845	0.0618176	0.518339	0.000840791	0.0376284	0.000533119	0.0201823	3.45981e-05	0.00609799	0.00633797	6.55224e-05	2.84822e-05	4.06905	0.465294	0.45875	0.00499855	0.000366591	0.000539681
H15	0.0200055	0.0109339	0.0080022	0.0179989	7.88593e-05	0.00711176	9.4056e-05	0.00213929	5.85132e-06	0.000435713	0.000805777	6.13734e-06	4.25491e-06	0.465294	0.3909	0.0140609	0.000902599	3.94491e-05	0.000147018
H16	0.0247916	0.00966268	0.00676213	0.0174629	4.01849e-05	0.0065987	2.83062e-05	0.0044118	1.22945e-05	0.00328399	0.000431858	1.81172e-06	2.52849e-06	0.45875	0.0140609	0.374092	0.00047572	0.000163681	4.60587e-05
C17	0.0236771	0.53373	0.00933802	0.00126731	0.514808	0.000553379	0.037645	4.93137e-05	0.0195794	3.173e-05	7.73673e-05	0.00639464	0.00638179	0.00499855	0.000902599	0.00047572	4.01857	0.466737	0.454197
H18	0.00220229	0.0303312	0.000550423	5.36546e-05	0.0185043	2.34928e-05	0.00645018	9.1181e-06	0.00509755	1.9463e-06	2.17381e-06	0.000479213	0.00421342	0.000366591	3.94491e-05	0.000163681	0.466737	0.401259	0.0142907
H19	0.00608407	0.0270716	0.0139268	9.88639e-05	0.0182915	9.86256e-05	0.00907118	5.53851e-06	0.00149876	6.31858e-06	4.41447e-06	0.000748939	0.000514894	0.000539681	0.000147018	4.60587e-05	0.454197	0.0142907	0.367412
Total	14.7527	16.1193	9.22493	6.03983	6.03383	6.06088	6.07646	0.959106	0.950785	0.944104	0.95004	0.953023	0.960615	6.15141	0.938966	0.921079	6.09941	0.950775	0.914054	86.0013
LDM — alliciin_conf_45_LIDI_matrix
	S1	S2	O3	C4	C5	C6	C7	H8	H9	H10	H11	H12	H13	C14	H15	H16	C17	H18	H19
S1	12.9151	0.525131	0.703137	0.0320118	0.00609412	0.0196891	0.00294917	0.00214189	0.000262608	0.000934324	0.000991536	0.000289859	0.000145187	0.459272	0.0197514	0.0246171	0.0250009	0.0102958	0.00169042		64.1505	21.8493	86
S2	0.525131	14.7541	0.102774	0.00671149	0.0429958	0.00327247	0.020179	0.000495604	0.0064965	0.000249606	0.000304503	0.00115246	0.00123646	0.0381237	0.0111477	0.0091687	0.533127	0.0288248	0.0293624
O3	0.703137	0.102774	8.30183	0.0120307	0.00165037	0.0112916	0.00107414	0.000441708	0.000325345	0.00276934	0.000421672	6.30168e-05	7.33478e-05	0.0627851	0.00801722	0.0062897	0.00531092	0.00147917	0.00298571
C4	0.0320118	0.00671149	0.0120307	3.98032	0.000285507	0.916547	0.000246634	0.475593	5.32543e-06	0.0292052	0.0300838	2.42494e-05	1.02826e-05	0.518385	0.0179391	0.0177142	0.00128141	6.5955e-05	4.66073e-05
C5	0.00609412	0.0429958	0.00165037	0.000285507	3.97529	0.000235357	0.922126	1.44115e-05	0.473236	1.17783e-05	1.81434e-05	0.0303014	0.0302016	0.000984093	4.77131e-05	5.95413e-05	0.514791	0.0190716	0.0179647
C6	0.0196891	0.00327247	0.0112916	0.916547	0.000235357	4.06597	0.000134411	0.0297927	4.85933e-06	0.477927	0.483012	1.97728e-05	6.42818e-06	0.0375321	0.00696083	0.00670845	0.00057837	9.62453e-05	1.5417e-05
C7	0.00294917	0.020179	0.00107414	0.000246634	0.922126	0.000134411	4.07973	1.40758e-05	0.0292311	8.97323e-06	1.62023e-05	0.48349	0.480504	0.000595792	3.86182e-05	8.68493e-05	0.0374811	0.00929026	0.00633931
H8	0.00214189	0.000495604	0.000441708	0.475593	1.44115e-05	0.0297927	1.40758e-05	0.414277	6.43386e-07	0.00667765	0.0036791	1.02902e-06	6.01832e-07	0.0202192	0.0021814	0.00439991	6.26069e-05	6.79642e-06	2.54283e-06
H9	0.000262608	0.0064965	0.000325345	5.32543e-06	0.473236	4.85933e-06	0.0292311	6.43386e-07	0.40978	3.91427e-07	2.64475e-07	0.00362859	0.00673404	2.61708e-05	1.1937e-05	5.13253e-06	0.0198001	0.00155654	0.00503276
H10	0.000934324	0.000249606	0.00276934	0.0292052	1.17783e-05	0.477927	8.97323e-06	0.00667765	3.91427e-07	0.399795	0.0163475	1.01686e-06	3.99767e-07	0.00606965	0.000434461	0.00326488	3.34178e-05	4.54363e-06	1.19811e-06
H11	0.000991536	0.000304503	0.000421672	0.0300838	1.81434e-05	0.483012	1.62023e-05	0.0036791	2.64475e-07	0.0163475	0.408059	1.85738e-06	6.96259e-07	0.00634193	0.000803151	0.000440107	7.68739e-05	5.30379e-06	2.80884e-06
H12	0.000289859	0.00115246	6.30168e-05	2.42494e-05	0.0303014	1.97728e-05	0.48349	1.02902e-06	0.00362859	1.01686e-06	1.85738e-06	0.40909	0.0166882	8.0396e-05	3.35409e-06	4.31397e-06	0.00637477	0.000788869	0.000468342
H13	0.000145187	0.00123646	7.33478e-05	1.02826e-05	0.0302016	6.42818e-06	0.480504	6.01832e-07	0.00673404	3.99767e-07	6.96259e-07	0.0166882	0.40922	3.01435e-05	3.60105e-06	3.79217e-06	0.00636781	0.000522519	0.00408043
C14	0.459272	0.0381237	0.0627851	0.518385	0.000984093	0.0375321	0.000595792	0.0202192	2.61708e-05	0.00606965	0.00634193	8.0396e-05	3.01435e-05	4.06795	0.465688	0.459615	0.00549687	0.000692448	0.000234544
H15	0.0197514	0.0111477	0.00801722	0.0179391	4.77131e-05	0.00696083	3.86182e-05	0.0021814	1.1937e-05	0.000434461	0.000803151	3.35409e-06	3.60105e-06	0.465688	0.390479	0.0141747	0.000726814	3.94024e-05	0.000174163
H16	0.0246171	0.0091687	0.0062897	0.0177142	5.95413e-05	0.00670845	8.68493e-05	0.00439991	5.13253e-06	0.00326488	0.000440107	4.31397e-06	3.79217e-06	0.459615	0.0141747	0.376973	0.000585343	0.00021153	2.6669e-05
C17	0.0250009	0.533127	0.00531092	0.00128141	0.514791	0.00057837	0.0374811	6.26069e-05	0.0198001	3.34178e-05	7.68739e-05	0.00637477	0.00636781	0.00549687	0.000726814	0.000585343	4.01065	0.462059	0.463569
H18	0.0102958	0.0288248	0.00147917	6.5955e-05	0.0190716	9.62453e-05	0.00929026	6.79642e-06	0.00155654	4.54363e-06	5.30379e-06	0.000788869	0.000522519	0.000692448	3.94024e-05	0.00021153	0.462059	0.393567	0.0146623
H19	0.00169042	0.0293624	0.00298571	4.66073e-05	0.0179647	1.5417e-05	0.00633931	2.54283e-06	0.00503276	1.19811e-06	2.80884e-06	0.000468342	0.00408043	0.000234544	0.000174163	2.6669e-05	0.463569	0.0146623	0.38826
LDM — alliciin_conf_46_LIDI_matrix
	S1	S2	O3	C4	C5	C6	C7	H8	H9	H10	H11	H12	H13	C14	H15	H16	C17	H18	H19
S1	12.9209	0.526431	0.701452	0.0259058	0.00631433	0.0144246	0.00304441	0.00403544	0.000269597	0.000893131	0.00098342	0.00015078	0.000298012	0.465015	0.0235082	0.0242207	0.0254716	0.00186482	0.00972198		64.1431	21.8585	86
S2	0.526431	14.728	0.102571	0.0192068	0.0428803	0.0133589	0.0201142	0.00111913	0.00635329	0.00186118	0.000375783	0.00122381	0.001151	0.0335805	0.00600644	0.00980089	0.532087	0.0287768	0.0290307
O3	0.701452	0.102571	8.31453	0.0089633	0.00172198	0.00497447	0.00100588	0.000658427	0.000361338	0.000293865	0.000601999	7.98223e-05	6.04946e-05	0.0634136	0.0059785	0.00569869	0.00694711	0.00451283	0.00158865
C4	0.0259058	0.0192068	0.0089633	3.97815	9.1456e-05	0.917239	7.61527e-05	0.473916	1.63567e-05	0.0300909	0.0300432	6.02013e-06	7.28226e-06	0.520093	0.0186134	0.016996	0.00131187	0.000238442	7.96032e-05
C5	0.00631433	0.0428803	0.00172198	9.1456e-05	3.97515	0.000107899	0.92238	6.30952e-06	0.473325	1.21326e-05	3.75526e-06	0.0302571	0.0303482	0.00105739	0.000324954	6.59477e-05	0.514759	0.0178647	0.0191604
C6	0.0144246	0.0133589	0.00497447	0.917239	0.000107899	4.06799	3.96924e-05	0.0293425	1.95734e-05	0.479766	0.48277	3.92886e-06	3.85035e-06	0.0376655	0.0101764	0.00588422	0.000741242	0.000198931	7.55281e-05
C7	0.00304441	0.0201142	0.00100588	7.61527e-05	0.92238	3.96924e-05	4.08005	4.81596e-06	0.0292805	1.43282e-05	8.44858e-07	0.480556	0.48362	0.000639298	0.000266682	8.58697e-05	0.0374709	0.00630706	0.00927845
H8	0.00403544	0.00111913	0.000658427	0.473916	6.30952e-06	0.0293425	4.81596e-06	0.410706	8.70049e-07	0.00670937	0.00368767	3.38445e-07	3.08144e-07	0.0200549	0.00121429	0.00510551	3.77791e-05	9.89298e-06	1.163e-05
H9	0.000269597	0.00635329	0.000361338	1.63567e-05	0.473325	1.95734e-05	0.0292805	8.70049e-07	0.409999	8.71852e-07	6.69863e-07	0.00673818	0.00363382	2.31978e-05	5.71848e-06	5.45146e-06	0.0197703	0.00499109	0.00156637
H10	0.000893131	0.00186118	0.000293865	0.0300909	1.21326e-05	0.479766	1.43282e-05	0.00670937	8.71852e-07	0.407344	0.0165356	6.44609e-07	7.50095e-07	0.00627106	0.000491308	0.00375347	0.000155421	7.51524e-06	3.18218e-05
H11	0.00098342	0.000375783	0.000601999	0.0300432	3.75526e-06	0.48277	8.44858e-07	0.00368767	6.69863e-07	0.0165356	0.40689	1.30969e-07	1.05167e-07	0.00630797	0.000745085	0.000419178	1.62023e-05	6.15052e-06	3.65041e-06
H12	0.00015078	0.00122381	7.98223e-05	6.02013e-06	0.0302571	3.92886e-06	0.480556	3.38445e-07	0.00673818	6.44609e-07	1.30969e-07	0.409316	0.0167116	3.11228e-05	1.09414e-05	3.77589e-06	0.00636892	0.00404805	0.000523123
H13	0.000298012	0.001151	6.04946e-05	7.28226e-06	0.0303482	3.85035e-06	0.48362	3.08144e-07	0.00363382	7.50095e-07	1.05167e-07	0.0167116	0.409634	8.50896e-05	2.62231e-05	4.47485e-06	0.00637611	0.000465215	0.00079301
C14	0.465015	0.0335805	0.0634136	0.520093	0.00105739	0.0376655	0.000639298	0.0200549	2.31978e-05	0.00627106	0.00630797	3.11228e-05	8.50896e-05	4.06898	0.461	0.459775	0.00532107	0.000162152	0.000652806
H15	0.0235082	0.00600644	0.0059785	0.0186134	0.000324954	0.0101764	0.000266682	0.00121429	5.71848e-06	0.000491308	0.000745085	1.09414e-05	2.62231e-05	0.461	0.385998	0.0141258	0.00113779	1.95972e-05	4.69882e-05
H16	0.0242207	0.00980089	0.00569869	0.016996	6.59477e-05	0.00588422	8.58697e-05	0.00510551	5.45146e-06	0.00375347	0.000419178	3.77589e-06	4.47485e-06	0.459775	0.0141258	0.378616	0.000520424	2.83704e-05	0.000204048
C17	0.0254716	0.532087	0.00694711	0.00131187	0.514759	0.000741242	0.0374709	3.77791e-05	0.0197703	0.000155421	1.62023e-05	0.00636892	0.00637611	0.00532107	0.00113779	0.000520424	4.0105	0.462502	0.462282
H18	0.00186482	0.0287768	0.00451283	0.000238442	0.0178647	0.000198931	0.00630706	9.89298e-06	0.00499109	7.51524e-06	6.15052e-06	0.00404805	0.000465215	0.000162152	1.95972e-05	2.83704e-05	0.462502	0.385545	0.0146344
H19	0.00972198	0.0290307	0.00158865	7.96032e-05	0.0191604	7.55281e-05	0.00927845	1.163e-05	0.00156637	3.18218e-05	3.65041e-06	0.000523123	0.00079301	0.000652806	4.69882e-05	0.000204048	0.462282	0.0146344	0.394857
Total	14.7549	16.1039	9.22541	6.04104	6.03583	6.06478	6.07423	0.956622	0.956361	0.954233	0.949391	0.95603	0.953219	6.15013	0.929697	0.925314	6.09378	0.932183	0.944542	86.0016
LDM — alliciin_conf_47_LIDI_matrix
	S1	S2	O3	C4	C5	C6	C7	H8	H9	H10	H11	H12	H13	C14	H15	H16	C17	H18	H19
S1	12.9091	0.521647	0.700803	0.0322605	0.00577196	0.017712	0.00226773	0.00195657	0.000765313	0.000755447	0.00101009	0.00189886	0.000292599	0.463781	0.0249669	0.0196477	0.0260054	0.00628395	0.00350053		64.14	21.8585	86
S2	0.521647	14.7378	0.102033	0.00674242	0.0316962	0.00282817	0.0217536	0.000481092	0.00750329	0.000175969	0.000323983	0.0208286	0.00147143	0.0385166	0.0110975	0.0091383	0.539398	0.0296961	0.0286174
O3	0.700803	0.102033	8.3083	0.0110237	0.00112931	0.00333037	0.00116577	0.00683697	0.000106018	0.000404314	0.000210859	0.000964497	0.000173768	0.0618325	0.00557293	0.00805871	0.00644611	0.000766063	0.00680781
C4	0.0322605	0.00674242	0.0110237	3.98287	0.000316611	0.922318	4.34342e-05	0.469237	9.8669e-05	0.0305342	0.0300424	3.07636e-05	3.59539e-06	0.516688	0.0182155	0.0174196	0.00127903	4.1307e-05	4.21086e-05
C5	0.00577196	0.0316962	0.00112931	0.000316611	3.98098	0.000217031	0.928018	6.49071e-06	0.47311	1.01206e-05	2.30292e-05	0.029679	0.0310413	0.00110194	5.183e-05	4.7791e-05	0.514549	0.0202009	0.0195743
C6	0.017712	0.00282817	0.00333037	0.922318	0.000217031	4.07931	2.67808e-05	0.0282047	4.75554e-05	0.481346	0.482914	2.11719e-05	2.10617e-06	0.0384931	0.00932389	0.00629636	0.00047732	6.19e-05	2.24833e-05
C7	0.00226773	0.0217536	0.00116577	4.34342e-05	0.928018	2.67808e-05	4.07852	3.91734e-06	0.0294984	1.39695e-06	2.41533e-06	0.474185	0.483244	0.000111442	3.92548e-05	1.89684e-05	0.0354925	0.0107415	0.0102929
H8	0.00195657	0.000481092	0.00683697	0.469237	6.49071e-06	0.0282047	3.91734e-06	0.390842	1.83915e-06	0.0065624	0.0035502	2.30502e-06	4.38425e-07	0.0190101	0.0013078	0.00488073	3.88618e-05	2.48683e-06	1.15026e-05
H9	0.000765313	0.00750329	0.000106018	9.8669e-05	0.47311	4.75554e-05	0.0294984	1.83915e-06	0.412461	2.8074e-06	7.30627e-06	0.00659317	0.00397626	0.000320186	2.84654e-05	2.22739e-05	0.0204967	0.0013253	0.00137576
H10	0.000755447	0.000175969	0.000404314	0.0305342	1.01206e-05	0.481346	1.39695e-06	0.0065624	2.8074e-06	0.413411	0.0167591	9.87658e-07	1.12157e-07	0.00639834	0.000467832	0.0039677	2.88369e-05	2.61819e-06	1.56743e-06
H11	0.00101009	0.000323983	0.000210859	0.0300424	2.30292e-05	0.482914	2.41533e-06	0.0035502	7.30627e-06	0.0167591	0.406135	1.67152e-06	1.71034e-07	0.00639638	0.000756186	0.000458113	7.96123e-05	3.43921e-06	1.9547e-06
H12	0.00189886	0.0208286	0.000964497	3.07636e-05	0.029679	2.11719e-05	0.474185	2.30502e-06	0.00659317	9.87658e-07	1.67152e-06	0.399707	0.0160281	6.85613e-05	2.87338e-05	1.39817e-05	0.00449973	0.000581456	0.000551624
H13	0.000292599	0.00147143	0.000173768	3.59539e-06	0.0310413	2.10617e-06	0.483244	4.38425e-07	0.00397626	1.12157e-07	1.71034e-07	0.0160281	0.409828	1.63701e-05	4.75228e-06	1.22141e-06	0.00655968	0.000709468	0.000697717
C14	0.463781	0.0385166	0.0618325	0.516688	0.00110194	0.0384931	0.000111442	0.0190101	0.000320186	0.00639834	0.00639638	6.85613e-05	1.63701e-05	4.06867	0.459514	0.463879	0.00541005	0.000503966	0.00031343
H15	0.0249669	0.0110975	0.00557293	0.0182155	5.183e-05	0.00932389	3.92548e-05	0.0013078	2.84654e-05	0.000467832	0.000756186	2.87338e-05	4.75228e-06	0.459514	0.376967	0.0140183	0.000744489	0.000205639	3.47531e-05
H16	0.0196477	0.0091383	0.00805871	0.0174196	4.7791e-05	0.00629636	1.89684e-05	0.00488073	2.22739e-05	0.0039677	0.000458113	1.39817e-05	1.22141e-06	0.463879	0.0140183	0.389913	0.000565411	2.92507e-05	0.000152346
C17	0.0260054	0.539398	0.00644611	0.00127903	0.514549	0.00047732	0.0354925	3.88618e-05	0.0204967	2.88369e-05	7.96123e-05	0.00449973	0.00655968	0.00541005	0.000744489	0.000565411	4.02319	0.462623	0.458422
H18	0.00628395	0.0296961	0.000766063	4.1307e-05	0.0202009	6.19e-05	0.0107415	2.48683e-06	0.0013253	2.61819e-06	3.43921e-06	0.000581456	0.000709468	0.000503966	0.000205639	2.92507e-05	0.462623	0.394387	0.0149675
H19	0.00350053	0.0286174	0.00680781	4.21086e-05	0.0195743	2.24833e-05	0.0102929	1.15026e-05	0.00137576	1.56743e-06	1.9547e-06	0.000551624	0.000697717	0.00031343	3.47531e-05	0.000152346	0.458422	0.0149675	0.377519
Total	14.7405	16.1117	9.22597	6.03921	6.03752	6.07295	6.07543	0.932938	0.957741	0.96083	0.948676	0.955685	0.954052	6.15103	0.923346	0.938529	6.10631	0.943132	0.922907	85.9985
LDM — alliciin_conf_48_LIDI_matrix
	S1	S2	O3	C4	C5	C6	C7	H8	H9	H10	H11	H12	H13	C14	H15	H16	C17	H18	H19
S1	12.9183	0.519822	0.698219	0.021997	0.00647129	0.0129332	0.00294943	0.00588496	0.000440438	0.0114478	0.00088826	0.000144153	0.000302502	0.47213	0.0242777	0.023137	0.0241295	0.00611951	0.00218959		64.141	21.8597	86
S2	0.519822	14.7319	0.103058	0.00872406	0.043576	0.0131878	0.0200923	0.000550621	0.00704317	0.0118899	0.000614677	0.00123025	0.00116627	0.0345305	0.0128905	0.00544244	0.532907	0.0267453	0.0302771
O3	0.698219	0.103058	8.30817	0.00856503	0.00151409	0.00180776	0.0012001	0.00239433	0.000138561	0.00124896	0.00021175	5.59099e-05	8.43404e-05	0.0631243	0.00465766	0.00767587	0.00928412	0.0135989	0.000548549
C4	0.021997	0.00872406	0.00856503	3.9901	8.51144e-05	0.927897	9.5792e-05	0.472925	5.67811e-06	0.0295063	0.0308534	4.58847e-06	6.94597e-06	0.51735	0.0182797	0.0188798	0.00069599	0.000132432	2.92969e-05
C5	0.00647129	0.043576	0.00151409	8.51144e-05	3.9739	7.90519e-05	0.922126	1.96751e-05	0.472218	6.10491e-05	3.49898e-06	0.0304842	0.0303135	0.000916417	6.85097e-05	0.000285968	0.514701	0.0183555	0.0185182
C6	0.0129332	0.0131878	0.00180776	0.927897	7.90519e-05	4.07154	6.82054e-05	0.0294435	9.06854e-06	0.473607	0.482571	3.87088e-06	4.03829e-06	0.0357165	0.0102237	0.0101398	0.000562714	0.000135547	4.65891e-05
C7	0.00294943	0.0200923	0.0012001	9.5792e-05	0.922126	6.82054e-05	4.08213	1.32141e-05	0.0288504	3.46352e-05	3.06905e-06	0.481264	0.4836	0.000548466	5.71002e-05	0.000224454	0.0376765	0.00906714	0.00647937
H8	0.00588496	0.000550621	0.00239433	0.472925	1.96751e-05	0.0294435	1.32141e-05	0.409639	7.68198e-07	0.00660304	0.00411394	6.84461e-07	1.60935e-06	0.0205403	0.00108128	0.00136674	7.81906e-05	2.47733e-05	5.8712e-06
H9	0.000440438	0.00704317	0.000138561	5.67811e-06	0.472218	9.06854e-06	0.0288504	7.68198e-07	0.404922	1.17577e-05	5.18944e-07	0.00672377	0.00360229	3.23818e-05	1.58839e-05	4.21302e-06	0.0195499	0.00150552	0.00509577
H10	0.0114478	0.0118899	0.00124896	0.0295063	6.10491e-05	0.473607	3.46352e-05	0.00660304	1.17577e-05	0.396167	0.0158478	2.80639e-06	1.9801e-06	0.00424491	0.000514859	0.000454462	0.000312671	7.08653e-05	6.76308e-05
H11	0.00088826	0.000614677	0.00021175	0.0308534	3.49898e-06	0.482571	3.06905e-06	0.00411394	5.18944e-07	0.0158478	0.407308	2.09034e-07	1.53998e-07	0.00652366	0.000698775	0.000704152	2.32223e-05	6.2761e-06	3.39421e-06
H12	0.000144153	0.00123025	5.59099e-05	4.58847e-06	0.0304842	3.87088e-06	0.481264	6.84461e-07	0.00672377	2.80639e-06	2.09034e-07	0.413031	0.0168112	2.91231e-05	3.73758e-06	9.46128e-06	0.0063886	0.000516307	0.00422993
H13	0.000302502	0.00116627	8.43404e-05	6.94597e-06	0.0303135	4.03829e-06	0.4836	1.60935e-06	0.00360229	1.9801e-06	1.53998e-07	0.0168112	0.409248	7.17276e-05	3.84679e-06	2.45865e-05	0.00639714	0.000750635	0.000481504
C14	0.47213	0.0345305	0.0631243	0.51735	0.000916417	0.0357165	0.000548466	0.0205403	3.23818e-05	0.00424491	0.00652366	2.91231e-05	7.17276e-05	4.08169	0.458075	0.459103	0.00508796	0.000523707	0.000344743
H15	0.0242777	0.0128905	0.00465766	0.0182797	6.85097e-05	0.0102237	5.71002e-05	0.00108128	1.58839e-05	0.000514859	0.000698775	3.73758e-06	3.84679e-06	0.458075	0.37386	0.014333	0.000687153	4.79373e-05	0.00018572
H16	0.023137	0.00544244	0.00767587	0.0188798	0.000285968	0.0101398	0.000224454	0.00136674	4.21302e-06	0.000454462	0.000704152	9.46128e-06	2.45865e-05	0.459103	0.014333	0.380207	0.00119064	6.43055e-05	3.96094e-05
C17	0.0241295	0.532907	0.00928412	0.00069599	0.514701	0.000562714	0.0376765	7.81906e-05	0.0195499	0.000312671	2.32223e-05	0.0063886	0.00639714	0.00508796	0.000687153	0.00119064	4.01855	0.454515	0.466955
H18	0.00611951	0.0267453	0.0135989	0.000132432	0.0183555	0.000135547	0.00906714	2.47733e-05	0.00150552	7.08653e-05	6.2761e-06	0.000516307	0.000750635	0.000523707	4.79373e-05	6.43055e-05	0.454515	0.368129	0.0143534
H19	0.00218959	0.0302771	0.000548549	2.92969e-05	0.0185182	4.65891e-05	0.00647937	5.8712e-06	0.00509577	6.76308e-05	3.39421e-06	0.00422993	0.000481504	0.000344743	0.00018572	3.96094e-05	0.466955	0.0143534	0.402275
Total	14.7518	16.1056	9.22556	6.04613	6.03369	6.06998	6.07648	0.954687	0.950171	0.952096	0.950375	0.960934	0.952872	6.16058	0.919962	0.923286	6.09969	0.914662	0.952126	86.0007
LDM — alliciin_conf_49_LIDI_matrix
	S1	S2	O3	C4	C5	C6	C7	H8	H9	H10	H11	H12	H13	C14	H15	H16	C17	H18	H19
S1	12.8997	0.527853	0.701112	0.0219464	0.00596271	0.0134389	0.00290184	0.0058124	0.000253552	0.0120592	0.000920289	0.000141681	0.000289513	0.469432	0.0238674	0.0227296	0.0252826	0.00159405	0.0111698		64.1229	21.8756	86
S2	0.527853	14.7177	0.104787	0.00863726	0.0431165	0.0125211	0.0201947	0.000568714	0.00663385	0.0111196	0.000589583	0.00122824	0.00115238	0.0352609	0.012762	0.0053471	0.532571	0.0291141	0.0285811
O3	0.701112	0.104787	8.31656	0.00842942	0.00167213	0.0018672	0.00112866	0.00239214	0.000306488	0.00130557	0.000217387	7.0131e-05	6.5694e-05	0.0643693	0.00419101	0.00872427	0.0048838	0.00237882	0.00154468
C4	0.0219464	0.00863726	0.00842942	3.98854	6.98953e-05	0.928021	5.04898e-05	0.473013	1.08028e-05	0.0295441	0.0309048	3.63413e-06	4.47629e-06	0.517223	0.0184687	0.0187908	0.000520668	0.000124721	4.28603e-05
C5	0.00596271	0.0431165	0.00167213	6.98953e-05	3.97541	4.69506e-05	0.922141	2.96256e-05	0.47316	4.6891e-05	2.32799e-06	0.0302317	0.0302925	0.00101854	8.45724e-05	0.000260215	0.514761	0.0180917	0.0190504
C6	0.0134389	0.0125211	0.0018672	0.928021	4.69506e-05	4.07113	1.64511e-05	0.0295004	1.56173e-05	0.474131	0.482772	3.09669e-06	1.57097e-06	0.0355405	0.0104478	0.00986098	0.000376653	0.000163028	5.12716e-05
C7	0.00290184	0.0201947	0.00112866	5.04898e-05	0.922141	1.64511e-05	4.07992	1.69899e-05	0.0291942	1.02185e-05	6.37577e-07	0.480509	0.483469	0.000607923	0.000120291	0.000216338	0.0374183	0.00634097	0.00935588
H8	0.0058124	0.000568714	0.00239214	0.473013	2.96256e-05	0.0295004	1.69899e-05	0.410315	1.90004e-06	0.00661433	0.00410406	8.36787e-07	2.28623e-06	0.0205384	0.00102654	0.0014349	9.38972e-05	5.58969e-06	1.48837e-05
H9	0.000253552	0.00663385	0.000306488	1.08028e-05	0.47316	1.56173e-05	0.0291942	1.90004e-06	0.409865	2.59225e-05	7.23263e-07	0.0067356	0.00362885	1.95392e-05	4.85986e-06	3.35619e-06	0.0197856	0.00505546	0.00155647
H10	0.0120592	0.0111196	0.00130557	0.0295441	4.6891e-05	0.474131	1.02185e-05	0.00661433	2.59225e-05	0.398344	0.0159376	3.4118e-06	1.58241e-06	0.00427326	0.000527007	0.000457588	0.000270724	0.000107491	9.54184e-05
H11	0.000920289	0.000589583	0.000217387	0.0309048	2.32799e-06	0.482772	6.37577e-07	0.00410406	7.23263e-07	0.0159376	0.408134	1.38121e-07	4.44944e-08	0.00650302	0.000701008	0.00069861	1.4303e-05	7.26044e-06	4.51605e-06
H12	0.000141681	0.00122824	7.0131e-05	3.63413e-06	0.0302317	3.09669e-06	0.480509	8.36787e-07	0.0067356	3.4118e-06	1.38121e-07	0.409256	0.0166816	3.10967e-05	5.01483e-06	9.80397e-06	0.00636515	0.00409319	0.000523923
H13	0.000289513	0.00115238	6.5694e-05	4.47629e-06	0.0302925	1.57097e-06	0.483469	2.28623e-06	0.00362885	1.58241e-06	4.44944e-08	0.0166816	0.408908	8.65106e-05	6.45624e-06	2.41003e-05	0.00637176	0.000467939	0.000786038
C14	0.469432	0.0352609	0.0643693	0.517223	0.00101854	0.0355405	0.000607923	0.0205384	1.95392e-05	0.00427326	0.00650302	3.10967e-05	8.65106e-05	4.07964	0.458888	0.458494	0.00577022	0.000203023	0.000751863
H15	0.0238674	0.012762	0.00419101	0.0184687	8.45724e-05	0.0104478	0.000120291	0.00102654	4.85986e-06	0.000527007	0.000701008	5.01483e-06	6.45624e-06	0.458888	0.377228	0.014458	0.000868424	3.53294e-05	0.000237829
H16	0.0227296	0.0053471	0.00872427	0.0187908	0.000260215	0.00986098	0.000216338	0.0014349	3.35619e-06	0.000457588	0.00069861	9.80397e-06	2.41003e-05	0.458494	0.014458	0.378239	0.00124989	4.45809e-05	6.40796e-05
C17	0.0252826	0.532571	0.0048838	0.000520668	0.514761	0.000376653	0.0374183	9.38972e-05	0.0197856	0.000270724	1.4303e-05	0.00636515	0.00637176	0.00577022	0.000868424	0.00124989	4.01101	0.464023	0.461663
H18	0.00159405	0.0291141	0.00237882	0.000124721	0.0180917	0.000163028	0.00634097	5.58969e-06	0.00505546	0.000107491	7.26044e-06	0.00409319	0.000467939	0.000203023	3.53294e-05	4.45809e-05	0.464023	0.389402	0.0146855
H19	0.0111698	0.0285811	0.00154468	4.28603e-05	0.0190504	5.12716e-05	0.00935588	1.48837e-05	0.00155647	9.54184e-05	4.51605e-06	0.000523923	0.000786038	0.000751863	0.000237829	6.40796e-05	0.461663	0.0146855	0.39366
Total	14.7465	16.0997	9.22601	6.04435	6.03545	6.0699	6.07362	0.955486	0.956258	0.954875	0.951513	0.955894	0.952241	6.15865	0.923928	0.921107	6.0933	0.935938	0.94384	85.9985
Weighted Ensemble LDM (Σ w·LDM)
	S1	S2	O3	C4	C5	C6	C7	H8	H9	H10	H11	H12	H13	C14	H15	H16	C17	H18	H19	Total
S1	12.9524	0.511803	0.693998	0.0308896	0.00395689	0.0188011	0.00246362	0.00206645	0.000342287	0.000971452	0.00100775	0.00024717	0.00035091	0.46483	0.0235472	0.022088	0.0248434	0.0056725	0.0059665	14.7662	64.1426	21.8576	86
S2	0.511803	14.7638	0.0968174	0.0127107	0.0420517	0.00686661	0.0206813	0.00512054	0.00595433	0.000656226	0.00135224	0.00137885	0.00127728	0.0366579	0.00618788	0.00799007	0.538947	0.0278984	0.0272538	16.1154
O3	0.693998	0.0968174	8.27944	0.0104533	0.00206478	0.00497661	0.00313835	0.00338955	0.000642635	0.000444365	0.000375271	0.00133758	0.00223914	0.06151	0.00487863	0.00659818	0.0190983	0.0126112	0.0167774	9.22079
C4	0.0308896	0.0127107	0.0104533	3.97971	0.000522936	0.917867	0.000305934	0.47046	0.000353686	0.0301515	0.0298573	2.98452e-05	3.14592e-05	0.518992	0.0173976	0.0178397	0.001284	0.000350894	0.000778512	6.03999
C5	0.00395689	0.0420517	0.00206478	0.000522936	3.97319	0.000563107	0.916794	0.00022	0.473131	3.59414e-05	0.000246349	0.030212	0.0299221	0.00367589	0.00767878	0.000415209	0.51532	0.0181009	0.017704	6.03581
C6	0.0188011	0.00686661	0.00497661	0.917867	0.000563107	4.07648	0.00022092	0.0286846	0.000704914	0.481483	0.481828	2.26289e-05	1.80662e-05	0.0380577	0.00774693	0.00681727	0.000946986	0.000163494	0.000830055	6.07308
C7	0.00246362	0.0206813	0.00313835	0.000305934	0.916794	0.00022092	4.08522	0.000120834	0.0291731	1.47943e-05	0.000105721	0.482013	0.480088	0.00387621	0.00916358	0.000247003	0.0367084	0.00751066	0.0074103	6.08525
H8	0.00206645	0.00512054	0.00338955	0.47046	0.00022	0.0286846	0.000120834	0.398226	7.15541e-05	0.00578153	0.0044033	2.38831e-05	7.4094e-06	0.0192693	0.00220019	0.00405168	0.000259588	0.000147897	8.73346e-05	0.944592
H9	0.000342287	0.00595433	0.000642635	0.000353686	0.473131	0.000704914	0.0291731	7.15541e-05	0.411238	4.33555e-05	0.000176314	0.00472797	0.00555504	0.000248144	0.000315939	0.00017203	0.0197824	0.00303602	0.00301742	0.958686
H10	0.000971452	0.000656226	0.000444365	0.0301515	3.59414e-05	0.481483	1.47943e-05	0.00578153	4.33555e-05	0.410647	0.0166846	2.22788e-06	1.26381e-06	0.00631037	0.000561362	0.0028277	4.86571e-05	2.09583e-05	2.81961e-05	0.956715
H11	0.00100775	0.00135224	0.000375271	0.0298573	0.000246349	0.481828	0.000105721	0.0044033	0.000176314	0.0166846	0.406559	6.60856e-06	5.89802e-06	0.00627976	0.00121924	0.000671735	7.1924e-05	1.38754e-05	6.87912e-05	0.950934
H12	0.00024717	0.00137885	0.00133758	2.98452e-05	0.030212	2.26289e-05	0.482013	2.38831e-05	0.00472797	2.22788e-06	6.60856e-06	0.408602	0.0165645	0.000123415	0.000375655	1.37916e-05	0.00624693	0.000715633	0.00159887	0.954243
H13	0.00035091	0.00127728	0.00223914	3.14592e-05	0.0299221	1.80662e-05	0.480088	7.4094e-06	0.00555504	1.26381e-06	5.89802e-06	0.0165645	0.404443	0.000216488	0.000598451	1.67911e-05	0.00614384	0.00200959	0.00105109	0.95054
C14	0.46483	0.0366579	0.06151	0.518992	0.00367589	0.0380577	0.00387621	0.0192693	0.000248144	0.00631037	0.00627976	0.000123415	0.000216488	4.06817	0.454562	0.463084	0.00203578	0.000484408	0.000408519	6.14879
H15	0.0235472	0.00618788	0.00487863	0.0173976	0.00767878	0.00774693	0.00916358	0.00220019	0.000315939	0.000561362	0.00121924	0.000375655	0.000598451	0.454562	0.368515	0.0137825	0.00117281	0.000325294	0.000238072	0.920467
H16	0.022088	0.00799007	0.00659818	0.0178397	0.000415209	0.00681727	0.000247003	0.00405168	0.00017203	0.0028277	0.000671735	1.37916e-05	1.67911e-05	0.463084	0.0137825	0.391567	0.000499549	0.000193925	0.000142619	0.939019
C17	0.0248434	0.538947	0.0190983	0.001284	0.51532	0.000946986	0.0367084	0.000259588	0.0197824	4.86571e-05	7.1924e-05	0.00624693	0.00614384	0.00203578	0.00117281	0.000499549	4.02797	0.455218	0.451223	6.10782
H18	0.0056725	0.0278984	0.0126112	0.000350894	0.0181009	0.000163494	0.00751066	0.000147897	0.00303602	2.09583e-05	1.38754e-05	0.000715633	0.00200959	0.000484408	0.000325294	0.000193925	0.455218	0.373117	0.0131622	0.920753
H19	0.0059665	0.0272538	0.0167774	0.000778512	0.017704	0.000830055	0.0074103	8.73346e-05	0.00301742	2.81961e-05	6.87912e-05	0.00159887	0.00105109	0.000408519	0.000238072	0.000142619	0.451223	0.0131622	0.363362	0.911108
	14.7662	16.1154	9.22079	6.03999	6.03581	6.07308	6.08525	0.944592	0.958686	0.956715	0.950934	0.954243	0.95054	6.14879	0.920467	0.939019	6.10782	0.920753	0.911108	86.0002

## Sheet: Weighted_LDM
Weighted LDM — alliciin_conf_1_LIDI_matrix (× 0.28125)
	S1	S2	O3	C4	C5	C6	C7	H8	H9	H10	H11	H12	H13	C14	H15	H16	C17	H18	H19	Total
S1	3.64206	0.143068	0.195303	0.00885352	0.0007174	0.00576736	0.000445604	0.00044322	8.8737e-05	0.000331201	0.000266759	2.61122e-05	0.000121296	0.130751	0.00663637	0.00640414	0.00706414	0.00168326	0.00186856	24.188
S2	0.143068	4.15289	0.0272425	0.00444266	0.0116067	0.0010227	0.00566533	0.00379658	0.00166996	0.000109094	4.14013e-05	0.000436515	0.000324149	0.00984805	0.00119386	0.00230328	0.152126	0.0073547	0.00814526
O3	0.195303	0.0272425	2.32884	0.00278116	0.000512748	0.00170477	0.000886814	0.000158072	0.000145196	0.000102896	0.000139985	6.62488e-05	0.00108595	0.017374	0.00151844	0.00136437	0.00561977	0.00800208	0.00051379
C4	0.00885352	0.00444266	0.00278116	1.11943	0.000130126	0.258387	0.000108125	0.13196	2.16657e-05	0.00850029	0.00840938	2.54896e-06	1.36561e-05	0.146098	0.00474937	0.00506643	0.000178152	3.46106e-05	3.04555e-05
C5	0.0007174	0.0116067	0.000512748	0.000130126	1.1176	5.41223e-05	0.257296	0.000150462	0.133383	8.35287e-06	8.13205e-06	0.00857232	0.00827201	0.00142866	0.00310806	9.20431e-05	0.144933	0.00468607	0.00542324
C6	0.00576736	0.0010227	0.00170477	0.258387	5.41223e-05	1.14793	8.08882e-05	0.00802597	5.47781e-06	0.135325	0.135887	1.86292e-06	7.72256e-06	0.0107843	0.00201427	0.00189301	0.00010231	1.6666e-05	7.72056e-06
C7	0.000445604	0.00566533	0.000886814	0.000108125	0.257296	8.08882e-05	1.14909	4.89066e-05	0.00826686	5.57705e-06	9.45353e-06	0.136166	0.134139	0.00163108	0.00396186	8.08057e-05	0.0102214	0.00163183	0.00262235
H8	0.00044322	0.00379658	0.000158072	0.13196	0.000150462	0.00802597	4.89066e-05	0.111182	5.298e-05	0.00184891	0.00100749	2.35702e-06	3.24348e-06	0.00534679	0.000501513	0.00126536	0.000106233	3.15368e-05	1.38059e-05
H9	8.8737e-05	0.00166996	0.000145196	2.16657e-05	0.133383	5.47781e-06	0.00826686	5.298e-05	0.116615	1.69871e-06	5.85783e-07	0.0010255	0.00187377	3.90505e-05	8.40774e-05	3.45834e-06	0.00560408	0.00129673	0.000353145
H10	0.000331201	0.000109094	0.000102896	0.00850029	8.35287e-06	0.135325	5.57705e-06	0.00184891	1.69871e-06	0.115935	0.00471319	1.68739e-07	4.32365e-07	0.00177574	0.000125026	0.00101546	8.66143e-06	1.41813e-06	1.44473e-06
H11	0.000266759	4.14013e-05	0.000139985	0.00840938	8.13205e-06	0.135887	9.45353e-06	0.00100749	5.85783e-07	0.00471319	0.114413	1.90378e-07	9.83194e-07	0.00179461	0.000213991	0.000131968	4.46039e-06	7.77702e-07	2.27847e-07
H12	2.61122e-05	0.000436515	6.62488e-05	2.54896e-06	0.00857232	1.86292e-06	0.136166	2.35702e-06	0.0010255	1.68739e-07	1.90378e-07	0.115923	0.00463165	3.01144e-05	0.000123324	2.20971e-06	0.00177507	0.000115769	0.000226143
H13	0.000121296	0.000324149	0.00108595	1.36561e-05	0.00827201	7.72256e-06	0.134139	3.24348e-06	0.00187377	4.32365e-07	9.83194e-07	0.00463165	0.111607	0.000111141	0.000332289	4.29683e-06	0.00167874	0.0010076	0.000125725
C14	0.130751	0.00984805	0.017374	0.146098	0.00142866	0.0107843	0.00163108	0.00534679	3.90505e-05	0.00177574	0.00179461	3.01144e-05	0.000111141	1.14529	0.127054	0.130222	0.000439752	5.46111e-05	0.000102018
H15	0.00663637	0.00119386	0.00151844	0.00474937	0.00310806	0.00201427	0.00396186	0.000501513	8.40774e-05	0.000125026	0.000213991	0.000123324	0.000332289	0.127054	0.10103	0.00381233	0.000257044	2.06751e-05	3.41807e-05
H16	0.00640414	0.00230328	0.00136437	0.00506643	9.20431e-05	0.00189301	8.08057e-05	0.00126536	3.45834e-06	0.00101546	0.000131968	2.20971e-06	4.29683e-06	0.130222	0.00381233	0.110609	7.55532e-05	1.12717e-05	5.13841e-05
C17	0.00706414	0.152126	0.00561977	0.000178152	0.144933	0.00010231	0.0102214	0.000106233	0.00560408	8.66143e-06	4.46039e-06	0.00177507	0.00167874	0.000439752	0.000257044	7.55532e-05	1.13317	0.124319	0.13043
H18	0.00168326	0.0073547	0.00800208	3.46106e-05	0.00468607	1.6666e-05	0.00163183	3.15368e-05	0.00129673	1.41813e-06	7.77702e-07	0.000115769	0.0010076	5.46111e-05	2.06751e-05	1.12717e-05	0.124319	0.0962066	0.00366293
H19	0.00186856	0.00814526	0.00051379	3.04555e-05	0.00542324	7.72056e-06	0.00262235	1.38059e-05	0.000353145	1.44473e-06	2.27847e-07	0.000226143	0.000125725	0.000102018	3.41807e-05	5.13841e-05	0.13043	0.00366293	0.109905
Weighted LDM — alliciin_conf_2_LIDI_matrix (× 0.197917)
	S1	S2	O3	C4	C5	C6	C7	H8	H9	H10	H11	H12	H13	C14	H15	H16	C17	H18	H19	Total
S1	2.56382	0.100633	0.137241	0.00647858	0.000513404	0.003694	0.000332066	0.000355657	6.36298e-05	0.000164618	0.000199127	0.000105669	1.98891e-05	0.0923176	0.00471391	0.00424107	0.00489729	0.00130783	0.00116127	17.0206
S2	0.100633	2.92632	0.0190093	0.00169501	0.00818169	0.000745586	0.00409084	8.70172e-05	0.00111595	4.39762e-05	8.90176e-05	0.000230014	0.000306839	0.00766602	0.00129742	0.00162095	0.107027	0.00573507	0.00525591
O3	0.137241	0.0190093	1.63758	0.0021523	0.000434138	0.000738745	0.000882177	0.00120291	9.94449e-05	7.95586e-05	4.38038e-05	0.00108876	6.39565e-05	0.0119988	0.000904711	0.00161776	0.00396518	0.000360672	0.00550807
C4	0.00647858	0.00169501	0.0021523	0.788283	7.65653e-05	0.182227	7.39475e-05	0.0930717	2.71971e-06	0.00602236	0.00593958	1.47561e-05	2.19512e-06	0.10244	0.00340829	0.00346966	7.58297e-05	4.04054e-05	1.13163e-05
C5	0.000513404	0.00818169	0.000434138	7.65653e-05	0.78643	6.50156e-05	0.180926	1.08208e-05	0.0938739	3.44341e-06	6.79686e-06	0.00577825	0.00603735	0.00104938	0.00238624	5.59087e-05	0.101977	0.00379186	0.00330812
C6	0.003694	0.000745586	0.000738745	0.182227	6.50156e-05	0.807639	5.65056e-05	0.00564053	2.83729e-06	0.0952761	0.0956153	4.05325e-06	1.46898e-06	0.00758348	0.00168602	0.00125853	4.12719e-05	2.42041e-05	6.3703e-06
C7	0.000332066	0.00409084	0.000882177	7.39475e-05	0.180926	5.65056e-05	0.808496	2.43859e-05	0.00580615	3.68747e-06	5.98136e-06	0.0942113	0.0958331	0.00113143	0.00274661	6.04565e-05	0.00717605	0.00178747	0.00113815
H8	0.000355657	8.70172e-05	0.00120291	0.0930717	1.08208e-05	0.00564053	2.43859e-05	0.0782407	1.15633e-06	0.00131057	0.000708779	1.98529e-05	8.68216e-07	0.00376648	0.000265045	0.000979329	6.60141e-06	1.4646e-06	2.19054e-06
H9	6.36298e-05	0.00111595	9.94449e-05	2.71971e-06	0.0938739	2.83729e-06	0.00580615	1.15633e-06	0.0819869	1.46863e-07	1.93984e-07	0.00131014	0.000720215	2.88749e-05	7.91622e-05	3.44896e-06	0.00395165	0.000264381	0.000910714
H10	0.000164618	4.39762e-05	7.95586e-05	0.00602236	3.44341e-06	0.0952761	3.68747e-06	0.00131057	1.46863e-07	0.0818732	0.0033261	1.21457e-06	1.02059e-07	0.00125967	8.69768e-05	0.000783445	2.40475e-06	1.25709e-06	3.6219e-07
H11	0.000199127	8.90176e-05	4.38038e-05	0.00593958	6.79686e-06	0.0956153	5.98136e-06	0.000708779	1.93984e-07	0.0033261	0.0805733	4.49214e-07	1.76942e-07	0.00126067	0.000141324	9.00079e-05	3.02322e-06	2.07009e-06	3.67039e-07
H12	0.000105669	0.000230014	0.00108876	1.47561e-05	0.00577825	4.05325e-06	0.0942113	1.98529e-05	0.00131014	1.21457e-06	4.49214e-07	0.0779986	0.00324027	6.43438e-05	0.000170164	5.57598e-06	0.00115811	8.73083e-05	0.000685413
H13	1.98891e-05	0.000306839	6.39565e-05	2.19512e-06	0.00603735	1.46898e-06	0.0958331	8.68216e-07	0.000720215	1.02059e-07	1.76942e-07	0.00324027	0.0816353	2.19594e-05	8.96805e-05	1.07788e-06	0.00124823	0.000160702	7.94947e-05
C14	0.0923176	0.00766602	0.0119988	0.10244	0.00104938	0.00758348	0.00113143	0.00376648	2.88749e-05	0.00125967	0.00126067	6.43438e-05	2.19594e-05	0.805563	0.0890161	0.0918137	0.000319134	6.89446e-05	4.49335e-05
H15	0.00471391	0.00129742	0.000904711	0.00340829	0.00238624	0.00168602	0.00274661	0.000265045	7.91622e-05	8.69768e-05	0.000141324	0.000170164	8.96805e-05	0.0890161	0.0706163	0.00265898	0.000188174	2.24797e-05	1.31963e-05
H16	0.00424107	0.00162095	0.00161776	0.00346966	5.59087e-05	0.00125853	6.04565e-05	0.000979329	3.44896e-06	0.000783445	9.00079e-05	5.57598e-06	1.07788e-06	0.0918137	0.00265898	0.078099	7.71183e-05	1.17304e-05	1.84969e-05
C17	0.00489729	0.107027	0.00396518	7.58297e-05	0.101977	4.12719e-05	0.00717605	6.60141e-06	0.00395165	2.40475e-06	3.02322e-06	0.00115811	0.00124823	0.000319134	0.000188174	7.71183e-05	0.79692	0.0918272	0.0875732
H18	0.00130783	0.00573507	0.000360672	4.04054e-05	0.00379186	2.42041e-05	0.00178747	1.4646e-06	0.000264381	1.25709e-06	2.07009e-06	8.73083e-05	0.000160702	6.89446e-05	2.24797e-05	1.17304e-05	0.0918272	0.0774185	0.00258261
H19	0.00116127	0.00525591	0.00550807	1.13163e-05	0.00330812	6.3703e-06	0.00113815	2.19054e-06	0.000910714	3.6219e-07	3.67039e-07	0.000685413	7.94947e-05	4.49335e-05	1.31963e-05	1.84969e-05	0.0875732	0.00258261	0.067906
Weighted LDM — alliciin_conf_3_LIDI_matrix (× 0.177083)
	S1	S2	O3	C4	C5	C6	C7	H8	H9	H10	H11	H12	H13	C14	H15	H16	C17	H18	H19	Total
S1	2.29587	0.0904906	0.12289	0.0054484	0.000463837	0.0031183	0.000287365	0.000561826	5.63444e-05	0.000167862	0.000156751	1.70548e-05	9.25466e-05	0.082022	0.0040617	0.00403169	0.00447657	0.00117676	0.00106683	15.2291
S2	0.0904906	2.61225	0.017026	0.00232127	0.00733513	0.0027214	0.00366502	8.98149e-05	0.000953526	6.99264e-05	0.00102875	0.000273327	0.000202105	0.00631871	0.00112949	0.00134464	0.0957168	0.00513033	0.00461843
O3	0.12289	0.017026	1.4659	0.00163031	0.000355182	0.00101112	0.000704946	9.44098e-05	9.2828e-05	9.52369e-05	5.66623e-05	5.33881e-05	0.000911771	0.0108738	0.000689214	0.00116261	0.00364232	0.000323137	0.00514791
C4	0.0054484	0.00232127	0.00163031	0.705027	6.49509e-05	0.162255	7.27708e-05	0.0841166	7.53754e-06	0.00531482	0.00518301	1.58213e-06	9.63706e-06	0.0922655	0.00290993	0.00330465	0.000113504	1.83356e-05	2.20455e-05
C5	0.000463837	0.00733513	0.000355182	6.49509e-05	0.703701	8.48379e-05	0.161944	3.42773e-05	0.0840247	8.14203e-06	0.000192546	0.00541135	0.00516759	0.00087405	0.00198889	4.6677e-05	0.0912072	0.00340453	0.00294879
C6	0.0031183	0.0027214	0.00101112	0.162255	8.48379e-05	0.720517	3.41566e-05	0.00528113	3.83315e-05	0.0855386	0.0846072	1.63384e-06	2.78331e-06	0.00664653	0.00102096	0.00145461	0.000103852	8.6247e-06	2.42035e-05
C7	0.000287365	0.00366502	0.000704946	7.27708e-05	0.161944	3.41566e-05	0.723464	3.71504e-05	0.00523115	2.03442e-06	7.91337e-05	0.085765	0.0843048	0.000999467	0.00239208	4.0417e-05	0.00639929	0.0015878	0.0010109
H8	0.000561826	8.98149e-05	9.44098e-05	0.0841166	3.42773e-05	0.00528113	3.71504e-05	0.0731629	3.91185e-06	0.000652852	0.00118045	8.63186e-07	2.27976e-06	0.00355836	0.000778853	0.000330594	8.95135e-06	1.69209e-06	1.57086e-06
H9	5.63444e-05	0.000953526	9.2828e-05	7.53754e-06	0.0840247	3.83315e-05	0.00523115	3.91185e-06	0.0736928	4.60744e-06	8.78313e-05	0.000647623	0.00117645	2.27701e-05	5.9827e-05	1.49298e-06	0.00353735	0.000242537	0.000808927
H10	0.000167862	6.99264e-05	9.52369e-05	0.00531482	8.14203e-06	0.0855386	2.03442e-06	0.000652852	4.60744e-06	0.0722293	0.00290804	1.33829e-07	2.22464e-07	0.00111314	6.8952e-05	0.0001387	3.12969e-06	1.48339e-07	7.93371e-07
H11	0.000156751	0.00102875	5.66623e-05	0.00518301	0.000192546	0.0846072	7.91337e-05	0.00118045	8.78313e-05	0.00290804	0.0713261	4.01837e-06	3.96759e-06	0.00105339	0.000548821	8.24511e-05	2.97177e-05	2.85464e-06	1.0617e-05
H12	1.70548e-05	0.000273327	5.33881e-05	1.58213e-06	0.00541135	1.63384e-06	0.085765	8.63186e-07	0.000647623	1.33829e-07	4.01837e-06	0.0731499	0.00290221	1.91602e-05	7.74453e-05	1.2153e-06	0.00111773	0.000144629	7.05371e-05
H13	9.25466e-05	0.000202105	0.000911771	9.63706e-06	0.00516759	2.78331e-06	0.0843048	2.27976e-06	0.00117645	2.22464e-07	3.96759e-06	0.00290221	0.0697757	7.26975e-05	0.000171211	6.60729e-06	0.00103654	7.82157e-05	0.00060521
C14	0.082022	0.00631871	0.0108738	0.0922655	0.00087405	0.00664653	0.000999467	0.00355836	2.27701e-05	0.00111314	0.00105339	1.91602e-05	7.26975e-05	0.72087	0.0799174	0.0820198	0.000260426	6.6606e-05	3.62015e-05
H15	0.0040617	0.00112949	0.000689214	0.00290993	0.00198889	0.00102096	0.00239208	0.000778853	5.9827e-05	6.8952e-05	0.000548821	7.74453e-05	0.000171211	0.0799174	0.0636861	0.00240592	0.000162838	2.07322e-05	1.04644e-05
H16	0.00403169	0.00134464	0.00116261	0.00330465	4.6677e-05	0.00145461	4.0417e-05	0.000330594	1.49298e-06	0.0001387	8.24511e-05	1.2153e-06	6.60729e-06	0.0820198	0.00240592	0.0691424	4.41326e-05	2.99407e-05	6.11309e-06
C17	0.00447657	0.0957168	0.00364232	0.000113504	0.0912072	0.000103852	0.00639929	8.95135e-06	0.00353735	3.12969e-06	2.97177e-05	0.00111773	0.00103654	0.000260426	0.000162838	4.41326e-05	0.713423	0.0821951	0.0782047
H18	0.00117676	0.00513033	0.000323137	1.83356e-05	0.00340453	8.6247e-06	0.0015878	1.69209e-06	0.000242537	1.48339e-07	2.85464e-06	0.000144629	7.82157e-05	6.6606e-05	2.07322e-05	2.99407e-05	0.0821951	0.0693911	0.0023018
H19	0.00106683	0.00461843	0.00514791	2.20455e-05	0.00294879	2.42035e-05	0.0010109	1.57086e-06	0.000808927	7.93371e-07	1.0617e-05	7.05371e-05	0.00060521	3.62015e-05	1.04644e-05	6.11309e-06	0.0782047	0.0023018	0.0603924
Weighted LDM — alliciin_conf_4_LIDI_matrix (× 0.09375)
	S1	S2	O3	C4	C5	C6	C7	H8	H9	H10	H11	H12	H13	C14	H15	H16	C17	H18	H19	Total
S1	1.21519	0.0485232	0.0649739	0.00262555	0.000485964	0.00168786	0.000253486	0.000172839	2.23679e-05	7.65708e-05	0.00012844	1.41658e-05	3.35959e-05	0.0437039	0.00218706	0.00195964	0.00229548	0.000697513	0.000216876	8.06258
S2	0.0485232	1.38361	0.00901243	0.000986247	0.00421214	0.000680284	0.0019196	3.43787e-05	0.000716159	0.000188206	2.78105e-05	0.00011339	0.000119495	0.00357501	0.000788694	0.000739614	0.0501868	0.00234425	0.00271979
O3	0.0649739	0.00901243	0.77575	0.00116824	0.000165452	0.000272742	0.000152875	0.000857632	1.81596e-05	3.88831e-05	2.37368e-05	7.91505e-06	1.20405e-05	0.00575716	0.000384391	0.000772319	0.0017847	0.0030514	8.98492e-05
C4	0.00262555	0.000986247	0.00116824	0.372146	6.70716e-05	0.0856143	9.96161e-06	0.0438097	1.186e-05	0.00281143	0.00282555	1.82552e-06	1.92728e-06	0.0485415	0.00178506	0.00161852	0.000623023	0.000211041	0.000576158
C5	0.000485964	0.00421214	0.000165452	6.70716e-05	0.372309	6.63483e-05	0.0864213	7.40274e-06	0.0442453	3.4928e-06	2.44139e-06	0.00287283	0.002849	4.51077e-05	2.0998e-05	8.67304e-06	0.0483577	0.0015901	0.00167552
C6	0.00168786	0.000680284	0.000272742	0.0856143	6.63483e-05	0.381794	4.76073e-06	0.00261039	1.59225e-05	0.0450323	0.0452798	2.79603e-06	1.50774e-06	0.00353284	0.000915116	0.00055904	0.000526796	7.42048e-05	0.000729993
C7	0.000253486	0.0019196	0.000152875	9.96161e-06	0.0864213	4.76073e-06	0.383109	2.93333e-06	0.00269428	5.85506e-07	4.47323e-07	0.0451683	0.0453821	2.0635e-05	1.28318e-05	5.23112e-06	0.00355653	0.000820541	0.000588094
H8	0.000172839	3.43787e-05	0.000857632	0.0438097	7.40274e-06	0.00261039	2.93333e-06	0.0364873	3.75671e-07	0.000605727	0.000332114	1.67236e-07	3.89253e-07	0.00177578	0.000109609	0.000461344	7.4935e-05	9.39513e-05	2.51481e-05
H9	2.23679e-05	0.000716159	1.81596e-05	1.186e-05	0.0442453	1.59225e-05	0.00269428	3.75671e-07	0.0379952	5.87821e-07	1.04227e-06	0.000634308	0.000338435	9.04436e-06	1.75281e-06	9.69551e-07	0.00182739	0.000126024	0.000461159
H10	7.65708e-05	0.000188206	3.88831e-05	0.00281143	3.4928e-06	0.0450323	5.85506e-07	0.000605727	5.87821e-07	0.0384461	0.00157131	1.03123e-07	1.00711e-07	0.000587731	4.43641e-05	0.000356716	1.41345e-05	3.07989e-06	2.2049e-05
H11	0.00012844	2.78105e-05	2.37368e-05	0.00282555	2.44139e-06	0.0452798	4.47323e-07	0.000332114	1.04227e-06	0.00157131	0.0383228	3.28578e-07	8.61601e-08	0.000594074	7.11933e-05	4.08794e-05	2.09759e-05	3.23894e-06	5.3935e-05
H12	1.41658e-05	0.00011339	7.91505e-06	1.82552e-06	0.00287283	2.79603e-06	0.0451683	1.67236e-07	0.000634308	1.03123e-07	3.28578e-07	0.0389828	0.00159034	1.28685e-06	5.80397e-07	3.01753e-07	0.000607307	4.4567e-05	0.000395768
H13	3.35959e-05	0.000119495	1.20405e-05	1.92728e-06	0.002849	1.50774e-06	0.0453821	3.89253e-07	0.000338435	1.00711e-07	8.61601e-08	0.00159034	0.0385304	1.63111e-06	1.08905e-06	4.12355e-07	0.000597524	6.38356e-05	4.29179e-05
C14	0.0437039	0.00357501	0.00575716	0.0485415	4.51077e-05	0.00353284	2.0635e-05	0.00177578	9.04436e-06	0.000587731	0.000594074	1.28685e-06	1.63111e-06	0.380811	0.0433799	0.0434629	0.000140866	2.70806e-05	3.87836e-05
H15	0.00218706	0.000788694	0.000384391	0.00178506	2.0998e-05	0.000915116	1.28318e-05	0.000109609	1.75281e-06	4.43641e-05	7.11933e-05	5.80397e-07	1.08905e-06	0.0433799	0.0367659	0.00134965	2.91787e-05	5.18851e-06	1.05867e-05
H16	0.00195964	0.000739614	0.000772319	0.00161852	8.67304e-06	0.00055904	5.23112e-06	0.000461344	9.69551e-07	0.000356716	4.08794e-05	3.01753e-07	4.12355e-07	0.0434629	0.00134965	0.0366814	2.84515e-05	5.61499e-06	5.41815e-06
C17	0.00229548	0.0501868	0.0017847	0.000623023	0.0483577	0.000526796	0.00355653	7.4935e-05	0.00182739	1.41345e-05	2.09759e-05	0.000607307	0.000597524	0.000140866	2.91787e-05	2.84515e-05	0.378047	0.0409616	0.0433162
H18	0.000697513	0.00234425	0.0030514	0.000211041	0.0015901	7.42048e-05	0.000820541	9.39513e-05	0.000126024	3.07989e-06	3.23894e-06	4.4567e-05	6.38356e-05	2.70806e-05	5.18851e-06	5.61499e-06	0.0409616	0.0314582	0.00121361
H19	0.000216876	0.00271979	8.98492e-05	0.000576158	0.00167552	0.000729993	0.000588094	2.51481e-05	0.000461159	2.2049e-05	5.3935e-05	0.000395768	4.29179e-05	3.87836e-05	1.05867e-05	5.41815e-06	0.0433162	0.00121361	0.0365847
Weighted LDM — alliciin_conf_5_LIDI_matrix (× 0.0416667)
	S1	S2	O3	C4	C5	C6	C7	H8	H9	H10	H11	H12	H13	C14	H15	H16	C17	H18	H19	Total
S1	0.53929	0.0215689	0.0288856	0.00124787	0.000249889	0.000807066	0.000129151	6.7265e-05	9.71737e-06	3.83875e-05	4.20473e-05	1.59823e-05	6.60676e-06	0.0193009	0.00102767	0.000919946	0.0010502	7.46378e-05	0.000304652	3.58326
S2	0.0215689	0.614177	0.00408611	0.000663372	0.00183038	0.000148035	0.000841387	0.000589095	0.000308391	6.32879e-06	1.67361e-05	5.0767e-05	5.05113e-05	0.00149415	0.000178855	0.00034244	0.0223001	0.00125025	0.00104455
O3	0.0288856	0.00408611	0.345293	0.000410404	7.70312e-05	0.000245885	7.20037e-05	2.48171e-05	6.88446e-06	2.13204e-05	1.45446e-05	5.44852e-06	3.6013e-06	0.0026337	0.000259395	0.000218155	0.000722234	3.57227e-05	0.00121735
C4	0.00124787	0.000663372	0.000410404	0.165875	5.93419e-06	0.0383151	3.14813e-06	0.0195478	1.00811e-06	0.00124502	0.0012582	2.36239e-07	2.23438e-07	0.0216427	0.000736097	0.000738282	2.38679e-05	9.73927e-06	5.792e-06
C5	0.000249889	0.00183038	7.70312e-05	5.93419e-06	0.165488	1.51243e-06	0.0384123	3.53903e-06	0.019651	1.45649e-07	2.36038e-07	0.00126302	0.00127723	2.74033e-05	2.86264e-05	5.21586e-06	0.0214645	0.000780953	0.00071585
C6	0.000807066	0.000148035	0.000245885	0.0383151	1.51243e-06	0.169983	1.7895e-06	0.00118448	1.28799e-07	0.0201197	0.0200408	1.08006e-07	1.01241e-07	0.00160221	0.000329662	0.000276619	1.61424e-05	2.92288e-06	3.36201e-06
C7	0.000129151	0.000841387	7.20037e-05	3.14813e-06	0.0384123	1.7895e-06	0.170191	1.7339e-06	0.00119097	8.28212e-08	2.24453e-07	0.0201545	0.0200693	6.92729e-06	4.19628e-06	4.03824e-06	0.00157897	0.000270813	0.0003641
H8	6.7265e-05	0.000589095	2.48171e-05	0.0195478	3.53903e-06	0.00118448	1.7339e-06	0.0164766	1.25396e-06	0.000149188	0.000272985	9.39672e-08	2.05237e-07	0.000796728	7.05501e-05	0.000191384	1.73073e-05	9.26495e-06	1.97868e-06
H9	9.71737e-06	0.000308391	6.88446e-06	1.00811e-06	0.019651	1.28799e-07	0.00119097	1.25396e-06	0.0167871	2.30849e-08	5.32564e-08	0.000149455	0.000280437	5.37518e-06	4.28116e-06	9.99605e-07	0.000809763	0.00021214	5.85624e-05
H10	3.83875e-05	6.32879e-06	2.13204e-05	0.00124502	1.45649e-07	0.0201197	8.28212e-08	0.000149188	2.30849e-08	0.0169023	0.000695051	9.63515e-09	7.18377e-09	0.000264421	3.35734e-05	1.94022e-05	1.10985e-06	3.98941e-07	3.73602e-07
H11	4.20473e-05	1.67361e-05	1.45446e-05	0.0012582	2.36038e-07	0.0200408	2.24453e-07	0.000272985	5.32564e-08	0.000695051	0.0171393	1.85191e-08	1.42437e-08	0.000264681	1.96413e-05	0.000155325	1.3836e-06	6.70113e-07	2.04815e-07
H12	1.59823e-05	5.0767e-05	5.44852e-06	2.36239e-07	0.00126302	1.08006e-07	0.0201545	9.39672e-08	0.000149455	9.63515e-09	1.85191e-08	0.0170523	0.000703335	9.09452e-07	9.00809e-07	2.50488e-07	0.000265751	2.00787e-05	2.87019e-05
H13	6.60676e-06	5.05113e-05	3.6013e-06	2.23438e-07	0.00127723	1.01241e-07	0.0200693	2.05237e-07	0.000280437	7.18377e-09	1.42437e-08	0.000703335	0.017306	7.27019e-07	6.64634e-07	1.74265e-07	0.000267624	0.00018117	2.02838e-05
C14	0.0193009	0.00149415	0.0026337	0.0216427	2.74033e-05	0.00160221	6.92729e-06	0.000796728	5.37518e-06	0.000264421	0.000264681	9.09452e-07	7.27019e-07	0.169141	0.0191706	0.019246	0.000174647	7.24061e-05	4.76615e-05
H15	0.00102767	0.000178855	0.000259395	0.000736097	2.86264e-05	0.000329662	4.19628e-06	7.05501e-05	4.28116e-06	3.35734e-05	1.96413e-05	9.00809e-07	6.64634e-07	0.0191706	0.016027	0.000596881	0.000219023	0.000116095	7.77233e-05
H16	0.000919946	0.00034244	0.000218155	0.000738282	5.21586e-06	0.000276619	4.03824e-06	0.000191384	9.99605e-07	1.94022e-05	0.000155325	2.50488e-07	1.74265e-07	0.019246	0.000596881	0.0162276	1.43311e-05	5.89658e-06	3.46627e-06
C17	0.0010502	0.0223001	0.000722234	2.38679e-05	0.0214645	1.61424e-05	0.00157897	1.73073e-05	0.000809763	1.10985e-06	1.3836e-06	0.000265751	0.000267624	0.000174647	0.000219023	1.43311e-05	0.167939	0.0194549	0.01835
H18	7.46378e-05	0.00125025	3.57227e-05	9.73927e-06	0.000780953	2.92288e-06	0.000270813	9.26495e-06	0.00021214	3.98941e-07	6.70113e-07	2.00787e-05	0.00018117	7.24061e-05	0.000116095	5.89658e-06	0.0194549	0.0169396	0.00056627
H19	0.000304652	0.00104455	0.00121735	5.792e-06	0.00071585	3.36201e-06	0.0003641	1.97868e-06	5.85624e-05	3.73602e-07	2.04815e-07	2.87019e-05	2.02838e-05	4.76615e-05	7.77233e-05	3.46627e-06	0.01835	0.00056627	0.0142265
Weighted LDM — alliciin_conf_6_LIDI_matrix (× 0.0416667)
	S1	S2	O3	C4	C5	C6	C7	H8	H9	H10	H11	H12	H13	C14	H15	H16	C17	H18	H19
S1	0.540085	0.0214755	0.0289061	0.00116209	0.000182892	0.000724886	9.57824e-05	8.33085e-05	1.7462e-05	3.28541e-05	5.70875e-05	6.13026e-06	1.31498e-05	0.0194166	0.000981352	0.000864652	0.00100825	0.000126028	0.000317682	3.58335
S2	0.0214755	0.615346	0.00398288	0.000419048	0.00179996	0.000263113	0.000865678	1.41784e-05	0.000219837	6.59637e-05	1.01948e-05	4.90215e-05	5.71295e-05	0.00157825	0.000344964	0.000339487	0.0223725	0.00124934	0.00102904
O3	0.0289061	0.00398288	0.344533	0.000579121	7.54394e-05	0.000119602	6.71962e-05	0.000439696	5.09153e-06	1.80801e-05	1.07999e-05	3.03148e-06	5.33544e-06	0.00256216	0.000162917	0.000340459	0.000821209	4.48047e-05	0.00136523
C4	0.00116209	0.000419048	0.000579121	0.165443	0.000145376	0.0379467	1.57137e-05	0.0194402	0.000297991	0.00124492	0.00124711	7.20503e-06	2.14679e-06	0.0215919	0.000799394	0.000716008	0.000126905	1.04603e-05	0.000109825
C5	0.000182892	0.00179996	7.54394e-05	0.000145376	0.165572	0.000264275	0.0384191	5.29796e-06	0.0193291	9.03249e-06	2.79907e-05	0.00127303	0.00127187	1.65298e-05	5.43801e-06	2.37099e-06	0.0215286	0.000778777	0.000681328
C6	0.000724886	0.000263113	0.000119602	0.0379467	0.000264275	0.169569	2.40654e-05	0.00115543	0.000636118	0.0200004	0.020076	1.07789e-05	3.35461e-06	0.00157274	0.000417832	0.000245841	7.82938e-05	1.56761e-05	4.32774e-05
C7	9.57824e-05	0.000865678	6.71962e-05	1.57137e-05	0.0384191	2.40654e-05	0.170347	7.41097e-07	0.00116652	9.69667e-07	3.78228e-06	0.0200712	0.0201873	6.81967e-06	1.05081e-06	3.84548e-07	0.00158062	0.00027449	0.000360859
H8	8.33085e-05	1.41784e-05	0.000439696	0.0194402	5.29796e-06	0.00115543	7.41097e-07	0.016112	9.33337e-06	0.000267841	0.000147136	2.10627e-07	7.84021e-08	0.000785779	4.58882e-05	0.000204487	1.73981e-05	1.74734e-06	3.69841e-05
H9	1.7462e-05	0.000219837	5.09153e-06	0.000297991	0.0193291	0.000636118	0.00116652	9.33337e-06	0.0163936	3.51064e-05	8.57691e-05	0.000265065	0.000146588	1.39071e-05	7.33446e-06	1.04606e-06	0.000791092	0.000210744	4.65679e-05
H10	3.28541e-05	6.59637e-05	1.80801e-05	0.00124492	9.03249e-06	0.0200004	9.69667e-07	0.000267841	3.51064e-05	0.0170565	0.000698643	4.62234e-07	1.71551e-07	0.000260593	1.97847e-05	0.000156331	4.7336e-06	2.21518e-06	1.55529e-06
H11	5.70875e-05	1.01948e-05	1.07999e-05	0.00124711	2.79907e-05	0.020076	3.78228e-06	0.000147136	8.57691e-05	0.000698643	0.0169691	1.32435e-06	4.10214e-07	0.000263614	3.17758e-05	1.81516e-05	5.66102e-06	2.09334e-06	1.58706e-06
H12	6.13026e-06	4.90215e-05	3.03148e-06	7.20503e-06	0.00127303	1.07789e-05	0.0200712	2.10627e-07	0.000265065	4.62234e-07	1.32435e-06	0.0173089	0.000709277	9.79348e-07	3.98456e-07	9.9639e-08	0.000271377	0.000186142	1.8182e-05
H13	1.31498e-05	5.71295e-05	5.33544e-06	2.14679e-06	0.00127187	3.35461e-06	0.0201873	7.84021e-08	0.000146588	1.71551e-07	4.10214e-07	0.000709277	0.0172194	6.65486e-07	3.2179e-07	5.88287e-08	0.000266337	2.04268e-05	2.8149e-05
C14	0.0194166	0.00157825	0.00256216	0.0215919	1.65298e-05	0.00157274	6.81967e-06	0.000785779	1.39071e-05	0.000260593	0.000263614	9.79348e-07	6.65486e-07	0.169334	0.0192709	0.0193178	5.63635e-05	1.90374e-05	1.38139e-05
H15	0.000981352	0.000344964	0.000162917	0.000799394	5.43801e-06	0.000417832	1.05081e-06	4.58882e-05	7.33446e-06	1.97847e-05	3.17758e-05	3.98456e-07	3.2179e-07	0.0192709	0.0163328	0.00060042	1.661e-05	6.46848e-06	3.45292e-06
H16	0.000864652	0.000339487	0.000340459	0.000716008	2.37099e-06	0.000245841	3.84548e-07	0.000204487	1.04606e-06	0.000156331	1.81516e-05	9.9639e-08	5.88287e-08	0.0193178	0.00060042	0.0162705	1.55926e-05	5.17795e-06	2.14746e-06
C17	0.00100825	0.0223725	0.000821209	0.000126905	0.0215286	7.82938e-05	0.00158062	1.73981e-05	0.000791092	4.7336e-06	5.66102e-06	0.000271377	0.000266337	5.63635e-05	1.661e-05	1.55926e-05	0.168024	0.0193668	0.0182026
H18	0.000126028	0.00124934	4.48047e-05	1.04603e-05	0.000778777	1.56761e-05	0.00027449	1.74734e-06	0.000210744	2.21518e-06	2.09334e-06	0.000186142	2.04268e-05	1.90374e-05	6.46848e-06	5.17795e-06	0.0193668	0.0164485	0.000546757
H19	0.000317682	0.00102904	0.00136523	0.000109825	0.000681328	4.32774e-05	0.000360859	3.69841e-05	4.65679e-05	1.55529e-06	1.58706e-06	1.8182e-05	2.8149e-05	1.38139e-05	3.45292e-06	2.14746e-06	0.0182026	0.000546757	0.0139148
Weighted LDM — alliciin_conf_7_LIDI_matrix (× 0.03125)
	S1	S2	O3	C4	C5	C6	C7	H8	H9	H10	H11	H12	H13	C14	H15	H16	C17	H18	H19	Total
S1	0.404574	0.0161849	0.0216327	0.00098921	0.000179312	0.000560831	9.32259e-05	5.69173e-05	7.13338e-06	2.4455e-05	3.08827e-05	1.16898e-05	4.86664e-06	0.0145189	0.000778868	0.000633665	0.000782761	5.95581e-05	0.000232883	2.68754
S2	0.0161849	0.461217	0.0030505	0.000269521	0.00137399	0.000119319	0.000633425	1.4451e-05	0.000231967	7.08322e-06	1.42504e-05	3.84281e-05	3.76816e-05	0.00123623	0.000184696	0.000275916	0.0167421	0.000934275	0.000786812
O3	0.0216327	0.0030505	0.258811	0.000354248	5.61237e-05	0.000113683	5.276e-05	0.000211564	5.28346e-06	1.29677e-05	7.08613e-06	4.06173e-06	2.64486e-06	0.00193924	0.000174054	0.000255839	0.000546198	2.71406e-05	0.000925558
C4	0.00098921	0.000269521	0.000354248	0.124504	4.7009e-06	0.0287955	3.31507e-06	0.0146745	8.38367e-07	0.000952469	0.000937249	2.49226e-07	1.65939e-07	0.0161558	0.00057172	0.000542612	1.3788e-05	5.74807e-06	3.07879e-06
C5	0.000179312	0.00137399	5.61237e-05	4.7009e-06	0.124117	5.15707e-06	0.0288127	2.64428e-07	0.0147394	2.52289e-07	3.27109e-07	0.000947607	0.000957946	2.03826e-05	2.18688e-05	2.97471e-06	0.0161031	0.000584689	0.00053639
C6	0.000560831	0.000119319	0.000113683	0.0287955	5.15707e-06	0.127493	1.22886e-06	0.000882581	4.21611e-07	0.0150412	0.0150898	2.31468e-07	9.77807e-08	0.00120164	0.000284752	0.000197003	9.85886e-06	4.57714e-06	2.64628e-06
C7	9.32259e-05	0.000633425	5.276e-05	3.31507e-06	0.0288127	1.22886e-06	0.127641	1.42528e-07	0.000893433	9.50777e-08	1.63503e-07	0.0151158	0.0150501	5.18841e-06	3.02517e-06	1.29928e-06	0.0011848	0.00020236	0.000273095
H8	5.69173e-05	1.4451e-05	0.000211564	0.0146745	2.64428e-07	0.000882581	1.42528e-07	0.0122596	2.78339e-08	0.000205587	0.000111244	1.23415e-08	8.75353e-09	0.000594658	4.25957e-05	0.000153187	7.36733e-07	1.87075e-07	3.37934e-07
H9	7.13338e-06	0.000231967	5.28346e-06	8.38367e-07	0.0147394	4.21611e-07	0.000893433	2.78339e-08	0.0125984	2.91943e-08	6.40033e-08	0.000112158	0.000210334	3.9538e-06	3.57776e-06	3.85024e-07	0.000609563	0.000158943	4.37632e-05
H10	2.4455e-05	7.08322e-06	1.29677e-05	0.000952469	2.52289e-07	0.0150412	9.50777e-08	0.000205587	2.91943e-08	0.0129083	0.000523317	1.18901e-08	5.93005e-09	0.000199436	1.45587e-05	0.000123192	5.16871e-07	1.92924e-07	1.53538e-07
H11	3.08827e-05	1.42504e-05	7.08613e-06	0.000937249	3.27109e-07	0.0150898	1.63503e-07	0.000111244	6.40033e-08	0.000523317	0.0126854	1.38101e-08	9.65532e-09	0.000198754	2.37391e-05	1.40818e-05	9.05951e-07	4.38965e-07	2.33057e-07
H12	1.16898e-05	3.84281e-05	4.06173e-06	2.49226e-07	0.000947607	2.31468e-07	0.0151158	1.23415e-08	0.000112158	1.18901e-08	1.38101e-08	0.0127909	0.000527289	6.77348e-07	6.73642e-07	1.11827e-07	0.000199352	1.49863e-05	2.14714e-05
H13	4.86664e-06	3.76816e-05	2.64486e-06	1.65939e-07	0.000957946	9.77807e-08	0.0150501	8.75353e-09	0.000210334	5.93005e-09	9.65532e-09	0.000527289	0.0129711	5.48773e-07	5.16434e-07	9.21049e-08	0.000200656	0.000135453	1.51142e-05
C14	0.0145189	0.00123623	0.00193924	0.0161558	2.03826e-05	0.00120164	5.18841e-06	0.000594658	3.9538e-06	0.000199436	0.000198754	6.77348e-07	5.48773e-07	0.126791	0.0143416	0.0144913	0.000129577	5.3466e-05	3.39794e-05
H15	0.000778868	0.000184696	0.000174054	0.00057172	2.18688e-05	0.000284752	3.02517e-06	4.25957e-05	3.57776e-06	1.45587e-05	2.37391e-05	6.73642e-07	5.16434e-07	0.0143416	0.0120072	0.000441633	0.000172169	9.2592e-05	5.43739e-05
H16	0.000633665	0.000275916	0.000255839	0.000542612	2.97471e-06	0.000197003	1.29928e-06	0.000153187	3.85024e-07	0.000123192	1.40818e-05	1.11827e-07	9.21049e-08	0.0144913	0.000441633	0.0122297	1.13632e-05	3.0445e-06	3.63397e-06
C17	0.000782761	0.0167421	0.000546198	1.3788e-05	0.0161031	9.85886e-06	0.0011848	7.36733e-07	0.000609563	5.16871e-07	9.05951e-07	0.000199352	0.000200656	0.000129577	0.000172169	1.13632e-05	0.125975	0.0145851	0.0137575
H18	5.95581e-05	0.000934275	2.71406e-05	5.74807e-06	0.000584689	4.57714e-06	0.00020236	1.87075e-07	0.000158943	1.92924e-07	4.38965e-07	1.49863e-05	0.000135453	5.3466e-05	9.2592e-05	3.0445e-06	0.0145851	0.0126554	0.000423015
H19	0.000232883	0.000786812	0.000925558	3.07879e-06	0.00053639	2.64628e-06	0.000273095	3.37934e-07	4.37632e-05	1.53538e-07	2.33057e-07	2.14714e-05	1.51142e-05	3.39794e-05	5.43739e-05	3.63397e-06	0.0137575	0.000423015	0.0106587
Weighted LDM — alliciin_conf_8_LIDI_matrix (× 0.0208333)
	S1	S2	O3	C4	C5	C6	C7	H8	H9	H10	H11	H12	H13	C14	H15	H16	C17	H18	H19	Total
S1	0.268959	0.0109264	0.0145376	0.00057311	0.000297579	0.000330172	0.000232118	5.58541e-05	1.03847e-05	2.89201e-05	1.51817e-05	6.68807e-06	2.2247e-05	0.00972066	0.000502542	0.000420331	0.000502656	6.8287e-05	0.000125096	1.79169
S2	0.0109264	0.30691	0.00214816	0.000459787	0.000854319	0.000247823	0.000454114	3.85734e-05	0.000143535	7.97839e-06	1.74063e-05	3.20176e-05	2.71286e-05	0.000714747	0.000135784	0.00015678	0.0111305	0.000597118	0.000566922
O3	0.0145376	0.00214816	0.173049	0.000238447	2.89043e-05	6.13281e-05	3.32596e-05	0.000225919	5.18993e-06	6.94586e-06	1.05436e-05	2.30805e-06	3.0563e-05	0.00127123	9.24312e-05	0.000171199	0.000150735	0.000157642	2.54657e-05
C4	0.00057311	0.000459787	0.000238447	0.0827923	7.61248e-06	0.0191389	7.37504e-06	0.00969831	3.34062e-07	0.000627181	0.000639486	4.28452e-07	4.58485e-07	0.0107551	0.000391862	0.000359685	2.75784e-05	1.46172e-06	1.41308e-06
C5	0.000297579	0.000854319	2.89043e-05	7.61248e-06	0.0827665	6.78809e-06	0.0191201	5.22388e-07	0.00986433	3.9554e-07	2.76043e-07	0.000630872	0.000624058	2.26603e-05	1.32179e-06	1.06569e-06	0.0107437	0.000372121	0.000395641
C6	0.000330172	0.000247823	6.13281e-05	0.0191389	6.78809e-06	0.0848674	7.20015e-06	0.000568734	2.53619e-07	0.0100606	0.010035	4.29905e-07	2.87843e-07	0.000790337	0.000222639	0.000124044	1.38162e-05	6.15741e-07	1.03378e-06
C7	0.000232118	0.000454114	3.32596e-05	7.37504e-06	0.0191201	7.20015e-06	0.085025	3.35613e-07	0.000604461	3.92019e-07	2.8373e-07	0.0100795	0.0099839	1.08722e-05	1.24308e-06	4.74378e-07	0.000765656	0.000127618	0.00019523
H8	5.58541e-05	3.85734e-05	0.000225919	0.00969831	5.22388e-07	0.000568734	3.35613e-07	0.00797033	4.40514e-08	7.32853e-05	0.000133707	1.91962e-08	4.91888e-08	0.000394003	1.73214e-05	0.000101807	9.42588e-07	2.78708e-07	8.23993e-08
H9	1.03847e-05	0.000143535	5.18993e-06	3.34062e-07	0.00986433	2.53619e-07	0.000604461	4.40514e-08	0.00858399	1.19722e-08	2.05455e-08	7.59242e-05	0.000139892	7.39923e-07	5.87488e-08	2.24637e-07	0.000414687	0.000104946	2.82274e-05
H10	2.89201e-05	7.97839e-06	6.94586e-06	0.000627181	3.9554e-07	0.0100606	3.92019e-07	7.32853e-05	1.19722e-08	0.0084967	0.000351886	1.79898e-08	1.86765e-08	0.00013277	1.48954e-05	9.18866e-06	3.57362e-07	1.70349e-08	4.25249e-08
H11	1.51817e-05	1.74063e-05	1.05436e-05	0.000639486	2.76043e-07	0.010035	2.8373e-07	0.000133707	2.05455e-08	0.000351886	0.00866269	1.76446e-08	1.50673e-08	0.000131572	9.68467e-06	7.76979e-05	1.27913e-06	2.16438e-07	7.63593e-08
H12	6.68807e-06	3.20176e-05	2.30805e-06	4.28452e-07	0.000630872	4.29905e-07	0.0100795	1.91962e-08	7.59242e-05	1.79898e-08	1.76446e-08	0.00856121	0.000345947	3.12974e-07	4.56573e-08	2.58963e-08	0.000131697	9.13608e-06	1.64818e-05
H13	2.2247e-05	2.71286e-05	3.0563e-05	4.58485e-07	0.000624058	2.87843e-07	0.0099839	4.91888e-08	0.000139892	1.86765e-08	1.50673e-08	0.000345947	0.00843274	9.50269e-07	8.64342e-08	1.28871e-07	0.000130092	8.29511e-05	1.01148e-05
C14	0.00972066	0.000714747	0.00127123	0.0107551	2.26603e-05	0.000790337	1.08722e-05	0.000394003	7.39923e-07	0.00013277	0.000131572	3.12974e-07	9.50269e-07	0.0847637	0.00962248	0.00967815	0.000112747	7.14317e-06	2.09707e-05
H15	0.000502542	0.000135784	9.24312e-05	0.000391862	1.32179e-06	0.000222639	1.24308e-06	1.73214e-05	5.87488e-08	1.48954e-05	9.68467e-06	4.56573e-08	8.64342e-08	0.00962248	0.00810272	0.00030038	2.55231e-05	7.39658e-07	7.89119e-06
H16	0.000420331	0.00015678	0.000171199	0.000359685	1.06569e-06	0.000124044	4.74378e-07	0.000101807	2.24637e-07	9.18866e-06	7.76979e-05	2.58963e-08	1.28871e-07	0.00967815	0.00030038	0.00814816	9.77169e-06	2.77548e-06	7.22154e-07
C17	0.000502656	0.0111305	0.000150735	2.75784e-05	0.0107437	1.38162e-05	0.000765656	9.42588e-07	0.000414687	3.57362e-07	1.27913e-06	0.000131697	0.000130092	0.000112747	2.55231e-05	9.77169e-06	0.0836555	0.00956733	0.00967141
H18	6.8287e-05	0.000597118	0.000157642	1.46172e-06	0.000372121	6.15741e-07	0.000127618	2.78708e-07	0.000104946	1.70349e-08	2.16438e-07	9.13608e-06	8.29511e-05	7.14317e-06	7.39658e-07	2.77548e-06	0.00956733	0.00790086	0.000298281
H19	0.000125096	0.000566922	2.54657e-05	1.41308e-06	0.000395641	1.03378e-06	0.00019523	8.23993e-08	2.82274e-05	4.25249e-08	7.63593e-08	1.64818e-05	1.01148e-05	2.09707e-05	7.89119e-06	7.22154e-07	0.00967141	0.000298281	0.0081912
Weighted LDM — alliciin_conf_9_LIDI_matrix (× 0.0208333)
	S1	S2	O3	C4	C5	C6	C7	H8	H9	H10	H11	H12	H13	C14	H15	H16	C17	H18	H19	Total
S1	0.26994	0.0108365	0.0144341	0.00060862	0.000123837	0.00035955	6.37937e-05	6.34897e-05	4.89447e-06	1.80715e-05	1.92835e-05	8.0152e-06	3.3205e-06	0.0096121	0.000460467	0.000496715	0.000532208	3.94993e-05	0.000155473	1.79167
S2	0.0108365	0.306804	0.00203439	0.000282089	0.000916112	0.00031203	0.000420733	1.02635e-05	0.000154774	0.000101035	7.64941e-06	2.54788e-05	2.52744e-05	0.000761402	0.000160123	0.000127964	0.0111572	0.000622094	0.000518271
O3	0.0144341	0.00203439	0.172613	0.000191588	3.88583e-05	0.00011817	3.64668e-05	1.14233e-05	3.61649e-06	6.99773e-06	1.14753e-05	2.77437e-06	1.84372e-06	0.00131419	0.000146855	9.54448e-05	0.000377995	1.84811e-05	0.000636265
C4	0.00060862	0.000282089	0.000191588	0.0829056	3.07898e-06	0.019104	1.52153e-06	0.00988844	4.25841e-07	0.000615992	0.000623367	1.24463e-07	1.13352e-07	0.0108549	0.000384345	0.000361798	1.17158e-05	4.24868e-06	2.94392e-06
C5	0.000123837	0.000916112	3.88583e-05	3.07898e-06	0.0827346	1.81636e-06	0.0192047	5.18419e-07	0.00982535	1.16921e-06	6.1463e-08	0.000631745	0.000638891	1.35983e-05	2.5382e-06	1.46547e-05	0.0107349	0.000391233	0.000356561
C6	0.00035955	0.00031203	0.00011817	0.019104	1.81636e-06	0.0847173	9.36246e-07	0.000617979	3.80892e-07	0.00997361	0.0100545	5.40457e-08	9.06791e-08	0.000783219	0.000172009	0.000125011	1.07975e-05	8.17593e-06	1.33332e-06
C7	6.37937e-05	0.000420733	3.64668e-05	1.52153e-06	0.0192047	9.36246e-07	0.0851024	1.58368e-07	0.000595378	2.27192e-07	2.00041e-08	0.0100785	0.0100364	3.42537e-06	1.72202e-06	2.18589e-06	0.00078986	0.000135787	0.000182062
H8	6.34897e-05	1.02635e-05	1.14233e-05	0.00988844	5.18419e-07	0.000617979	1.58368e-07	0.00856943	5.20513e-08	0.000140006	7.68198e-05	2.52757e-08	1.50076e-08	0.000417443	3.78955e-05	9.87914e-05	2.54724e-06	2.11559e-06	8.88698e-07
H9	4.89447e-06	0.000154774	3.61649e-06	4.25841e-07	0.00982535	3.80892e-07	0.000595378	5.20513e-08	0.00839474	6.70601e-07	1.59077e-08	7.47361e-05	0.000140364	2.79252e-06	5.16059e-07	2.36109e-06	0.000405261	0.000106068	2.90101e-05
H10	1.80715e-05	0.000101035	6.99773e-06	0.000615992	1.16921e-06	0.00997361	2.27192e-07	0.000140006	6.70601e-07	0.00848714	0.000343618	1.94815e-08	1.35265e-07	0.000126052	9.96604e-06	6.8954e-05	9.1807e-06	1.14503e-05	5.429e-07
H11	1.92835e-05	7.64941e-06	1.14753e-05	0.000623367	6.1463e-08	0.0100545	2.00041e-08	7.68198e-05	1.59077e-08	0.000343618	0.00846008	3.36562e-09	6.37277e-09	0.000130911	1.60601e-05	8.54295e-06	4.78644e-07	9.26059e-07	4.7002e-08
H12	8.0152e-06	2.54788e-05	2.77437e-06	1.24463e-07	0.000631745	5.40457e-08	0.0100785	2.52757e-08	7.47361e-05	1.94815e-08	3.36562e-09	0.00853232	0.000352201	4.38213e-07	1.12093e-07	4.52827e-07	0.000132967	1.0077e-05	1.42763e-05
H13	3.3205e-06	2.52744e-05	1.84372e-06	1.13352e-07	0.000638891	9.06791e-08	0.0100364	1.50076e-08	0.000140364	1.35265e-07	6.37277e-09	0.000352201	0.00866447	3.64894e-07	7.5919e-08	3.49105e-07	0.000133917	9.11172e-05	1.01133e-05
C14	0.0096121	0.000761402	0.00131419	0.0108549	1.35983e-05	0.000783219	3.42537e-06	0.000417443	2.79252e-06	0.000126052	0.000130911	4.38213e-07	3.64894e-07	0.084556	0.00962618	0.00958211	8.24604e-05	3.65626e-05	1.99809e-05
H15	0.000460467	0.000160123	0.000146855	0.000384345	2.5382e-06	0.000172009	1.72202e-06	3.78955e-05	5.16059e-07	9.96604e-06	1.60601e-05	1.12093e-07	7.5919e-08	0.00962618	0.00804846	0.000297101	6.08e-06	2.65014e-06	1.19537e-06
H16	0.000496715	0.000127964	9.54448e-05	0.000361798	1.46547e-05	0.000125011	2.18589e-06	9.87914e-05	2.36109e-06	6.8954e-05	8.54295e-06	4.52827e-07	3.49105e-07	0.00958211	0.000297101	0.00804527	0.000110459	6.36742e-05	3.08325e-05
C17	0.000532208	0.0111572	0.000377995	1.17158e-05	0.0107349	1.07975e-05	0.00078986	2.54724e-06	0.000405261	9.1807e-06	4.78644e-07	0.000132967	0.000133917	8.24604e-05	6.08e-06	0.000110459	0.084002	0.0097243	0.00915429
H18	3.94993e-05	0.000622094	1.84811e-05	4.24868e-06	0.000391233	8.17593e-06	0.000135787	2.11559e-06	0.000106068	1.14503e-05	9.26059e-07	1.0077e-05	9.11172e-05	3.65626e-05	2.65014e-06	6.36742e-05	0.0097243	0.00849576	0.000282273
H19	0.000155473	0.000518271	0.000636265	2.94392e-06	0.000356561	1.33332e-06	0.000182062	8.88698e-07	2.90101e-05	5.429e-07	4.7002e-08	1.42763e-05	1.01133e-05	1.99809e-05	1.19537e-06	3.08325e-05	0.00915429	0.000282273	0.00706058
Weighted LDM — alliciin_conf_10_LIDI_matrix (× 0.0104167)
	S1	S2	O3	C4	C5	C6	C7	H8	H9	H10	H11	H12	H13	C14	H15	H16	C17	H18	H19	Total
S1	0.134444	0.00532702	0.00725701	0.000312277	0.000136246	0.000206902	0.000108824	1.57082e-05	4.56377e-06	1.19405e-05	9.66443e-06	9.64489e-06	3.07059e-06	0.00483516	0.000254891	0.00024011	0.000238456	6.67888e-05	3.48078e-05	0.895822
S2	0.00532702	0.153824	0.00105867	0.000180251	0.000439934	5.02349e-05	0.000235843	0.000124695	6.82655e-05	4.81142e-06	2.2601e-06	1.32654e-05	1.61764e-05	0.00035281	0.00010563	6.72437e-05	0.00556622	0.000286583	0.000293788
O3	0.00725701	0.00105867	0.0864588	0.000101464	2.60976e-05	6.12375e-05	4.71337e-05	6.67336e-06	3.56205e-06	3.70061e-06	5.08962e-06	4.71825e-05	2.90012e-06	0.0006407	6.52992e-05	4.82988e-05	0.00012403	1.53149e-05	0.000138888
C4	0.000312277	0.000180251	0.000101464	0.0414583	1.30732e-06	0.00956127	1.2458e-06	0.00489339	1.39739e-07	0.000314351	0.000311025	2.23764e-07	8.26602e-08	0.00541426	0.000181012	0.000186081	1.36649e-05	9.47518e-07	1.85121e-06
C5	0.000136246	0.000439934	2.60976e-05	1.30732e-06	0.041413	1.02218e-06	0.00955489	9.52456e-07	0.00493525	9.49036e-08	5.17972e-08	0.000306481	0.000316106	1.22402e-05	2.47816e-06	8.54955e-07	0.00536576	0.000195553	0.000181491
C6	0.000206902	5.02349e-05	6.12375e-05	0.00956127	1.02218e-06	0.0424844	7.82617e-07	0.000297554	1.17622e-07	0.00501041	0.00503072	1.77926e-07	3.45519e-08	0.000398059	7.86324e-05	7.26956e-05	2.66691e-06	2.22084e-07	1.43321e-06
C7	0.000108824	0.000235843	4.71337e-05	1.2458e-06	0.00955489	7.82617e-07	0.0425179	1.21489e-06	0.00030198	9.2568e-08	3.90172e-08	0.00496917	0.005041	6.35812e-06	2.33011e-06	7.26876e-07	0.000381475	9.35285e-05	6.16273e-05
H8	1.57082e-05	0.000124695	6.67336e-06	0.00489339	9.52456e-07	0.000297554	1.21489e-06	0.00415757	7.52937e-08	6.84604e-05	3.73935e-05	5.92474e-08	9.37077e-08	0.000201083	1.89329e-05	4.63407e-05	1.04409e-05	2.90239e-07	1.28283e-06
H9	4.56377e-06	6.82655e-05	3.56205e-06	1.39739e-07	0.00493525	1.17622e-07	0.00030198	7.52937e-08	0.00429313	7.26364e-09	5.15068e-09	6.89345e-05	3.78585e-05	4.23891e-07	1.14205e-07	5.27141e-08	0.000207696	1.48593e-05	5.08823e-05
H10	1.19405e-05	4.81142e-06	3.70061e-06	0.000314351	9.49036e-08	0.00501041	9.2568e-08	6.84604e-05	7.26364e-09	0.00428511	0.000173648	1.03204e-08	5.80228e-09	6.57948e-05	4.89803e-06	3.75975e-05	5.48629e-07	5.01301e-08	7.56912e-08
H11	9.66443e-06	2.2601e-06	5.08962e-06	0.000311025	5.17972e-08	0.00503072	3.90172e-08	3.73935e-05	5.15068e-09	0.000173648	0.00422585	1.4509e-08	1.91457e-09	6.62478e-05	8.53693e-06	4.95506e-06	1.4367e-07	1.08642e-08	6.23006e-08
H12	9.64489e-06	1.32654e-05	4.71825e-05	2.23764e-07	0.000306481	1.77926e-07	0.00496917	5.92474e-08	6.89345e-05	1.03204e-08	1.4509e-08	0.0041361	0.000170574	1.1159e-06	1.47599e-07	7.53113e-08	6.2722e-05	4.85194e-06	3.79897e-05
H13	3.07059e-06	1.61764e-05	2.90012e-06	8.26602e-08	0.000316106	3.45519e-08	0.005041	9.37077e-08	3.78585e-05	5.80228e-09	1.91457e-09	0.000170574	0.00428838	2.05654e-07	1.13624e-07	2.84057e-08	6.58599e-05	8.31809e-06	4.27489e-06
C14	0.00483516	0.00035281	0.0006407	0.00541426	1.22402e-05	0.000398059	6.35812e-06	0.000201083	4.23891e-07	6.57948e-05	6.62478e-05	1.1159e-06	2.05654e-07	0.0423918	0.00480244	0.00481972	4.66449e-05	8.29168e-06	3.28979e-06
H15	0.000254891	0.00010563	6.52992e-05	0.000181012	2.47816e-06	7.86324e-05	2.33011e-06	1.89329e-05	1.14205e-07	4.89803e-06	8.53693e-06	1.47599e-07	1.13624e-07	0.00480244	0.00391682	0.000147347	3.64177e-06	3.93529e-07	3.7331e-07
H16	0.00024011	6.72437e-05	4.82988e-05	0.000186081	8.54955e-07	7.26956e-05	7.26876e-07	4.63407e-05	5.27141e-08	3.75975e-05	4.95506e-06	7.53113e-08	2.84057e-08	0.00481972	0.000147347	0.00407023	1.14418e-05	3.56298e-06	6.35015e-07
C17	0.000238456	0.00556622	0.00012403	1.36649e-05	0.00536576	2.66691e-06	0.000381475	1.04409e-05	0.000207696	5.48629e-07	1.4367e-07	6.2722e-05	6.58599e-05	4.66449e-05	3.64177e-06	1.14418e-05	0.0418358	0.00483881	0.00474066
H18	6.67888e-05	0.000286583	1.53149e-05	9.47518e-07	0.000195553	2.22084e-07	9.35285e-05	2.90239e-07	1.48593e-05	5.01301e-08	1.08642e-08	4.85194e-06	8.31809e-06	8.29168e-06	3.93529e-07	3.56298e-06	0.00483881	0.00409965	0.000145067
H19	3.48078e-05	0.000293788	0.000138888	1.85121e-06	0.000181491	1.43321e-06	6.16273e-05	1.28283e-06	5.08823e-05	7.56912e-08	6.23006e-08	3.79897e-05	4.27489e-06	3.28979e-06	3.7331e-07	6.35015e-07	0.00474066	0.000145067	0.00383988
Weighted LDM — alliciin_conf_11_LIDI_matrix (× 0.0104167)
	S1	S2	O3	C4	C5	C6	C7	H8	H9	H10	H11	H12	H13	C14	H15	H16	C17	H18	H19	Total
S1	0.134459	0.00534422	0.00725234	0.000344057	0.000137415	0.000187091	0.000110293	2.05333e-05	4.58928e-06	7.98894e-06	1.03893e-05	9.98813e-06	3.10711e-06	0.00484602	0.000258311	0.000207529	0.000237257	3.49914e-05	6.55971e-05	0.895824
S2	0.00534422	0.153968	0.00105904	7.15212e-05	0.000439978	3.09807e-05	0.000236955	4.60904e-06	6.76972e-05	1.79646e-06	3.48329e-06	1.33507e-05	1.62101e-05	0.000397846	0.000118622	8.98108e-05	0.00557741	0.00029784	0.000285295
O3	0.00725234	0.00105904	0.0864535	9.89819e-05	2.36834e-05	3.22409e-05	4.23246e-05	5.92333e-05	3.38542e-06	3.99134e-06	2.11457e-06	4.32842e-05	2.68383e-06	0.000636539	6.38602e-05	8.47716e-05	0.000114754	0.000129015	1.46507e-05
C4	0.000344057	7.15212e-05	9.89819e-05	0.0414881	1.16463e-06	0.00960654	1.02397e-06	0.00489784	6.16781e-08	0.00031753	0.000313148	1.16907e-07	4.29779e-08	0.00538373	0.000187697	0.000182986	1.35119e-05	6.26709e-07	3.44139e-06
C5	0.000137415	0.000439978	2.36834e-05	1.16463e-06	0.0414146	1.09738e-06	0.0095557	4.4718e-08	0.00493593	4.90504e-08	8.65795e-08	0.000307119	0.000315909	1.23484e-05	2.67012e-06	7.25581e-07	0.00536711	0.000182263	0.000195581
C6	0.000187091	3.09807e-05	3.22409e-05	0.00960654	1.09738e-06	0.0424916	3.75878e-07	0.000296396	4.85012e-08	0.00501355	0.0050307	4.58701e-08	1.32126e-08	0.000399016	9.51522e-05	6.61537e-05	5.18625e-06	3.66535e-07	2.28927e-06
C7	0.000110293	0.000236955	4.23246e-05	1.02397e-06	0.0095557	3.75878e-07	0.0425152	7.01379e-08	0.000302242	3.47557e-08	5.32923e-08	0.00497078	0.00504037	6.97764e-06	2.68282e-06	8.61408e-07	0.000381824	6.19339e-05	9.34247e-05
H8	2.05333e-05	4.60904e-06	5.92333e-05	0.00489784	4.4718e-08	0.000296396	7.01379e-08	0.00410388	6.56955e-09	6.87903e-05	3.72059e-05	2.42941e-08	4.10367e-09	0.000199086	1.39319e-05	5.12766e-05	5.59437e-07	1.27694e-07	7.37342e-08
H9	4.58928e-06	6.76972e-05	3.38542e-06	6.16781e-08	0.00493593	4.85012e-08	0.000302242	6.56955e-09	0.00429484	2.3039e-09	4.63518e-09	6.90492e-05	3.78594e-05	4.54352e-07	1.18957e-07	8.14558e-08	0.000207345	5.10425e-05	1.48871e-05
H10	7.98894e-06	1.79646e-06	3.99134e-06	0.00031753	4.90504e-08	0.00501355	3.47557e-08	6.87903e-05	2.3039e-09	0.00430558	0.000174651	6.15305e-09	1.46968e-09	6.63599e-05	4.82916e-06	4.14081e-05	3.14887e-07	2.26059e-08	1.02518e-07
H11	1.03893e-05	3.48329e-06	2.11457e-06	0.000313148	8.65795e-08	0.0050307	5.32923e-08	3.72059e-05	4.63518e-09	0.000174651	0.00423407	5.91035e-09	2.4063e-09	6.66026e-05	7.88348e-06	4.80989e-06	7.39722e-07	4.32494e-08	2.08298e-07
H12	9.98813e-06	1.33507e-05	4.32842e-05	1.16907e-07	0.000307119	4.58701e-08	0.00497078	2.42941e-08	6.90492e-05	6.15305e-09	5.91035e-09	0.00414195	0.000170639	1.08747e-06	1.64151e-07	1.86663e-07	6.30308e-05	3.84745e-05	4.8616e-06
H13	3.10711e-06	1.62101e-05	2.68383e-06	4.29779e-08	0.000315909	1.32126e-08	0.00504037	4.10367e-09	3.78594e-05	1.46968e-09	2.4063e-09	0.000170639	0.00428492	2.41436e-07	1.3305e-07	5.59443e-08	6.58703e-05	4.31144e-06	8.33094e-06
C14	0.00484602	0.000397846	0.000636539	0.00538373	1.23484e-05	0.000399016	6.97764e-06	0.000199086	4.54352e-07	6.63599e-05	6.66026e-05	1.08747e-06	2.41436e-07	0.0423869	0.00478314	0.00483144	4.87671e-05	3.81482e-06	7.6294e-06
H15	0.000258311	0.000118622	6.38602e-05	0.000187697	2.67012e-06	9.51522e-05	2.68282e-06	1.39319e-05	1.18957e-07	4.82916e-06	7.88348e-06	1.64151e-07	1.3305e-07	0.00478314	0.00390069	0.000145737	4.74718e-06	3.61571e-07	3.33106e-07
H16	0.000207529	8.98108e-05	8.47716e-05	0.000182986	7.25581e-07	6.61537e-05	8.61408e-07	5.12766e-05	8.14558e-08	4.14081e-05	4.80989e-06	1.86663e-07	5.59443e-08	0.00483144	0.000145737	0.00408814	8.18386e-06	1.35907e-06	4.40646e-07
C17	0.000237257	0.00557741	0.000114754	1.35119e-05	0.00536711	5.18625e-06	0.000381824	5.59437e-07	0.000207345	3.14887e-07	7.39722e-07	6.30308e-05	6.58703e-05	4.87671e-05	4.74718e-06	8.18386e-06	0.041839	0.00474674	0.00483944
H18	3.49914e-05	0.00029784	0.000129015	6.26709e-07	0.000182263	3.66535e-07	6.19339e-05	1.27694e-07	5.10425e-05	2.26059e-08	4.32494e-08	3.84745e-05	4.31144e-06	3.81482e-06	3.61571e-07	1.35907e-06	0.00474674	0.00385419	0.000145678
H19	6.55971e-05	0.000285295	1.46507e-05	3.44139e-06	0.000195581	2.28927e-06	9.34247e-05	7.37342e-08	1.48871e-05	1.02518e-07	2.08298e-07	4.8616e-06	8.33094e-06	7.6294e-06	3.33106e-07	4.40646e-07	0.00483944	0.000145678	0.00409694
Weighted LDM — alliciin_conf_12_LIDI_matrix (× 0.0104167)
	S1	S2	O3	C4	C5	C6	C7	H8	H9	H10	H11	H12	H13	C14	H15	H16	C17	H18	H19	Total
S1	0.134934	0.00537483	0.00723255	0.000323196	6.01409e-05	0.000199561	3.11223e-05	2.33802e-05	2.36769e-06	9.52972e-06	1.0136e-05	3.90969e-06	1.61656e-06	0.00480278	0.000255598	0.000213488	0.000260573	1.93154e-05	7.75607e-05	0.895844
S2	0.00537483	0.153743	0.00101502	8.75931e-05	0.00045894	4.69455e-05	0.000211206	4.114e-06	7.77802e-05	3.25463e-06	4.51739e-06	1.28176e-05	1.26008e-05	0.000410267	5.18969e-05	0.000109866	0.00558531	0.000312534	0.000262534
O3	0.00723255	0.00101502	0.0861742	0.000127607	1.86805e-05	0.00011795	1.77132e-05	4.73549e-06	1.69307e-06	2.80419e-05	4.43466e-06	1.35312e-06	8.86881e-07	0.000648832	6.38286e-05	8.39793e-05	0.000183404	9.04328e-06	0.000311687
C4	0.000323196	8.75931e-05	0.000127607	0.0414752	1.53351e-06	0.00954526	1.07329e-06	0.00495212	2.87885e-07	0.000306002	0.000312369	7.99438e-08	5.30476e-08	0.00540222	0.000185523	0.000185824	4.60023e-06	1.91428e-06	1.18995e-06
C5	6.01409e-05	0.00045894	1.86805e-05	1.53351e-06	0.0413709	1.31322e-06	0.0096038	2.41287e-07	0.00491302	8.41888e-08	1.02889e-07	0.000315898	0.000319202	6.81043e-06	6.94145e-06	1.0453e-06	0.00536877	0.000194906	0.000178623
C6	0.000199561	4.69455e-05	0.00011795	0.00954526	1.31322e-06	0.042353	3.97532e-07	0.000310056	1.19632e-07	0.00498299	0.00503014	5.48921e-08	2.38537e-08	0.000390537	7.01293e-05	7.42604e-05	1.94613e-06	6.02204e-07	7.3558e-07
C7	3.11223e-05	0.000211206	1.77132e-05	1.07329e-06	0.0096038	3.97532e-07	0.0425512	7.76366e-08	0.000297956	3.65312e-08	5.92494e-08	0.00503921	0.0050175	1.73168e-06	9.72202e-07	4.86342e-07	0.000395469	6.76136e-05	9.107e-05
H8	2.33802e-05	4.114e-06	4.73549e-06	0.00495212	2.41287e-07	0.000310056	7.76366e-08	0.00430342	2.85965e-08	6.9782e-05	3.82904e-05	1.34341e-08	6.72064e-09	0.000209571	4.56908e-05	2.20806e-05	1.28866e-06	6.62606e-07	4.66768e-07
H9	2.36769e-06	7.77802e-05	1.69307e-06	2.87885e-07	0.00491302	1.19632e-07	0.000297956	2.85965e-08	0.00420034	8.41116e-09	1.63583e-08	3.74045e-05	7.01387e-05	1.31487e-06	1.11387e-06	1.58281e-07	0.0002031	5.3028e-05	1.45787e-05
H10	9.52972e-06	3.25463e-06	2.80419e-05	0.000306002	8.41888e-08	0.00498299	3.65312e-08	6.9782e-05	8.41116e-09	0.00419354	0.000170939	4.33848e-09	1.87665e-09	6.31294e-05	3.49546e-05	4.57847e-06	2.88686e-07	1.23371e-07	4.26927e-07
H11	1.0136e-05	4.51739e-06	4.43466e-06	0.000312369	1.02889e-07	0.00503014	5.92494e-08	3.82904e-05	1.63583e-08	0.000170939	0.0042422	4.55203e-09	3.11032e-09	6.57276e-05	4.61853e-06	8.37546e-06	1.28785e-07	4.52943e-08	4.71802e-08
H12	3.90969e-06	1.28176e-05	1.35312e-06	7.99438e-08	0.000315898	5.48921e-08	0.00503921	1.34341e-08	3.74045e-05	4.33848e-09	4.55203e-09	0.00426565	0.000175881	2.25779e-07	2.12407e-07	3.93475e-08	6.64709e-05	4.99358e-06	7.15209e-06
H13	1.61656e-06	1.26008e-05	8.86881e-07	5.30476e-08	0.000319202	2.38537e-08	0.0050175	6.72064e-09	7.01387e-05	1.87665e-09	3.11032e-09	0.000175881	0.00432494	1.79726e-07	1.62948e-07	3.50331e-08	6.69343e-05	4.51556e-05	5.04451e-06
C14	0.00480278	0.000410267	0.000648832	0.00540222	6.81043e-06	0.000390537	1.73168e-06	0.000209571	1.31487e-06	6.31294e-05	6.57276e-05	2.25779e-07	1.79726e-07	0.0422634	0.00477503	0.00484737	4.28681e-05	1.76023e-05	1.12681e-05
H15	0.000255598	5.18969e-05	6.38286e-05	0.000185523	6.94145e-06	7.01293e-05	9.72202e-07	4.56908e-05	1.11387e-06	3.49546e-05	4.61853e-06	2.12407e-07	1.62948e-07	0.00477503	0.00399867	0.000148452	5.46277e-05	2.9075e-05	1.84083e-05
H16	0.000213488	0.000109866	8.39793e-05	0.000185824	1.0453e-06	7.42604e-05	4.86342e-07	2.20806e-05	1.58281e-07	4.57847e-06	8.37546e-06	3.93475e-08	3.50331e-08	0.00484737	0.000148452	0.00407084	4.03859e-06	1.08755e-06	1.16718e-06
C17	0.000260573	0.00558531	0.000183404	4.60023e-06	0.00536877	1.94613e-06	0.000395469	1.28866e-06	0.0002031	2.88686e-07	1.28785e-07	6.64709e-05	6.69343e-05	4.28681e-05	5.46277e-05	4.03859e-06	0.0419909	0.00486227	0.0045827
H18	1.93154e-05	0.000312534	9.04328e-06	1.91428e-06	0.000194906	6.02204e-07	6.76136e-05	6.62606e-07	5.3028e-05	1.23371e-07	4.52943e-08	4.99358e-06	4.51556e-05	1.76023e-05	2.9075e-05	1.08755e-06	0.00486227	0.00422119	0.00014098
H19	7.75607e-05	0.000262534	0.000311687	1.18995e-06	0.000178623	7.3558e-07	9.107e-05	4.66768e-07	1.45787e-05	4.26927e-07	4.71802e-08	7.15209e-06	5.04451e-06	1.12681e-05	1.84083e-05	1.16718e-06	0.0045827	0.00014098	0.00354913
Weighted LDM — alliciin_conf_13_LIDI_matrix (× 0.0104167)
	S1	S2	O3	C4	C5	C6	C7	H8	H9	H10	H11	H12	H13	C14	H15	H16	C17	H18	H19	Total
S1	0.134644	0.00532821	0.00724836	0.000279011	0.00012729	0.000157424	0.000101004	3.88907e-05	4.37115e-06	9.86364e-06	1.03639e-05	2.84536e-06	9.17065e-06	0.00486065	0.000244922	0.000250753	0.00024127	3.75123e-05	6.85294e-05	0.895816
S2	0.00532821	0.153655	0.0010406	0.000205231	0.000442555	0.000161649	0.000234274	1.12061e-05	6.81144e-05	3.09691e-05	4.50001e-06	1.60791e-05	1.30441e-05	0.000354494	6.65412e-05	0.000107949	0.00557068	0.000290943	0.000287984
O3	0.00724836	0.0010406	0.0864215	9.4493e-05	2.93331e-05	5.42585e-05	5.60277e-05	6.40278e-06	3.87352e-06	3.1718e-06	5.99993e-06	3.43889e-06	5.76576e-05	0.000642945	5.29954e-05	6.4125e-05	0.000140071	0.000161575	1.61607e-05
C4	0.000279011	0.000205231	9.4493e-05	0.0414722	1.48661e-06	0.00953437	1.74383e-06	0.0049378	1.2513e-07	0.00031094	0.000311972	1.28112e-07	2.75474e-07	0.00541744	0.000195375	0.000175876	1.86258e-05	1.94729e-06	1.07432e-06
C5	0.00012729	0.000442555	2.93331e-05	1.48661e-06	0.0414242	1.3703e-06	0.00956072	1.4168e-07	0.00493724	5.62075e-07	5.41553e-08	0.000317198	0.000305586	1.14951e-05	9.13815e-07	2.2981e-06	0.00536339	0.000180838	0.00019639
C6	0.000157424	0.000161649	5.42585e-05	0.00953437	1.3703e-06	0.0423736	1.70404e-06	0.000305542	1.59797e-07	0.00499206	0.0050279	1.217e-07	2.36654e-07	0.000390891	0.000103079	6.11024e-05	1.09921e-05	2.29517e-06	3.3366e-07
C7	0.000101004	0.000234274	5.60277e-05	1.74383e-06	0.00956072	1.70404e-06	0.0425305	1.35767e-07	0.000303021	4.42288e-07	5.34468e-08	0.00504352	0.00496303	6.09722e-06	6.71438e-07	2.18029e-06	0.000379472	6.04331e-05	9.29784e-05
H8	3.88907e-05	1.12061e-05	6.40278e-06	0.0049378	1.4168e-07	0.000305542	1.35767e-07	0.00426993	1.00208e-08	6.96077e-05	3.82682e-05	6.9289e-09	9.9277e-09	0.000208869	1.36716e-05	5.27571e-05	4.69794e-07	1.11569e-07	6.42789e-08
H9	4.37115e-06	6.81144e-05	3.87352e-06	1.2513e-07	0.00493724	1.59797e-07	0.000303021	1.00208e-08	0.00430387	2.46698e-08	6.25824e-09	3.80191e-05	6.88337e-05	4.57496e-07	6.95303e-08	1.14113e-07	0.000207657	5.05033e-05	1.50495e-05
H10	9.86364e-06	3.09691e-05	3.1718e-06	0.00031094	5.62075e-07	0.00499206	4.42288e-07	6.96077e-05	2.46698e-08	0.00422068	0.000171488	4.02667e-08	3.06159e-08	6.4837e-05	5.09394e-06	3.83432e-05	1.61794e-06	8.81332e-08	4.18572e-08
H11	1.03639e-05	4.50001e-06	5.99993e-06	0.000311972	5.41553e-08	0.0050279	5.34468e-08	3.82682e-05	6.25824e-09	0.000171488	0.00423351	3.42657e-09	2.0022e-08	6.57021e-05	7.91289e-06	4.30858e-06	2.38076e-07	8.3566e-08	1.56361e-08
H12	2.84536e-06	1.60791e-05	3.43889e-06	1.28112e-07	0.000317198	1.217e-07	0.00504352	6.9289e-09	3.80191e-05	4.02667e-08	3.42657e-09	0.00430017	0.000170313	2.08176e-07	2.6439e-08	1.04195e-07	6.59079e-05	4.17628e-06	8.33718e-06
H13	9.17065e-06	1.30441e-05	5.76576e-05	2.75474e-07	0.000305586	2.36654e-07	0.00496303	9.9277e-09	6.88337e-05	3.06159e-08	2.0022e-08	0.000170313	0.00411733	1.36175e-06	8.56671e-08	1.36969e-07	6.17751e-05	3.66957e-05	4.78169e-06
C14	0.00486065	0.000354494	0.000642945	0.00541744	1.14951e-05	0.000390891	6.09722e-06	0.000208869	4.57496e-07	6.4837e-05	6.57021e-05	2.08176e-07	1.36175e-06	0.0423733	0.00481405	0.00478369	4.33926e-05	3.53551e-06	7.74433e-06
H15	0.000244922	6.65412e-05	5.29954e-05	0.000195375	9.13815e-07	0.000103079	6.71438e-07	1.36716e-05	6.95303e-08	5.09394e-06	7.91289e-06	2.6439e-08	8.56671e-08	0.00481405	0.00405564	0.000146087	1.07777e-05	7.22168e-07	3.45553e-06
H16	0.000250753	0.000107949	6.4125e-05	0.000175876	2.2981e-06	6.11024e-05	2.18029e-06	5.27571e-05	1.14113e-07	3.83432e-05	4.30858e-06	1.04195e-07	1.36969e-07	0.00478369	0.000146087	0.00392214	3.29687e-06	3.7592e-07	4.66975e-07
C17	0.00024127	0.00557068	0.000140071	1.86258e-05	0.00536339	1.09921e-05	0.000379472	4.69794e-07	0.000207657	1.61794e-06	2.38076e-07	6.59079e-05	6.17751e-05	4.33926e-05	1.07777e-05	3.29687e-06	0.0418484	0.00472701	0.00484047
H18	3.75123e-05	0.000290943	0.000161575	1.94729e-06	0.000180838	2.29517e-06	6.04331e-05	1.11569e-07	5.05033e-05	8.81332e-08	8.3566e-08	4.17628e-06	3.66957e-05	3.53551e-06	7.22168e-07	3.7592e-07	0.00472701	0.00381243	0.000144278
H19	6.85294e-05	0.000287984	1.61607e-05	1.07432e-06	0.00019639	3.3366e-07	9.29784e-05	6.42789e-08	1.50495e-05	4.18572e-08	1.56361e-08	8.33718e-06	4.78169e-06	7.74433e-06	3.45553e-06	4.66975e-07	0.00484047	0.000144278	0.00411063
Weighted LDM — alliciin_conf_14_LIDI_matrix (× 0.0104167)
	S1	S2	O3	C4	C5	C6	C7	H8	H9	H10	H11	H12	H13	C14	H15	H16	C17	H18	H19	Total
S1	0.13452	0.00534067	0.00726226	0.000342722	0.000134556	0.000203907	0.000109094	2.35302e-05	4.50313e-06	1.03869e-05	9.59208e-06	3.06282e-06	1.01412e-05	0.00481323	0.000254632	0.000209297	0.000235477	6.5995e-05	3.55111e-05	0.89583
S2	0.00534067	0.153949	0.00105351	7.2246e-05	0.000441211	3.63506e-05	0.000237579	5.35785e-06	6.70962e-05	3.26715e-06	2.70002e-06	1.62069e-05	1.33383e-05	0.00040177	0.000102334	0.000110421	0.00557839	0.000285533	0.000297422
O3	0.00726226	0.00105351	0.0863643	0.000109166	2.47767e-05	0.000100196	4.55002e-05	4.40993e-06	3.49434e-06	3.91726e-06	2.41279e-05	2.85752e-06	4.67443e-05	0.000640748	7.23636e-05	8.32884e-05	0.000118972	1.47749e-05	0.000134788
C4	0.000342722	7.2246e-05	0.000109166	0.0414792	1.17307e-06	0.00955677	1.10841e-06	0.00495312	6.63561e-08	0.000313472	0.000305842	4.64648e-08	1.71667e-07	0.00539906	0.000181906	0.000188662	1.31621e-05	3.37048e-06	7.78406e-07
C5	0.000134556	0.000441211	2.47767e-05	1.17307e-06	0.0414137	1.13769e-06	0.00955576	1.16019e-07	0.00493636	7.95913e-08	5.17576e-08	0.000316216	0.000306446	1.22286e-05	2.50206e-06	9.38903e-07	0.005366	0.00019566	0.000181878
C6	0.000203907	3.63506e-05	0.000100196	0.00955677	1.13769e-06	0.0423794	4.11477e-07	0.000310046	5.2607e-08	0.00503201	0.00498247	1.26292e-08	8.36604e-08	0.000391468	6.82965e-05	7.53189e-05	5.7585e-06	2.56307e-06	6.11135e-07
C7	0.000109094	0.000237579	4.55002e-05	1.10841e-06	0.00955576	4.11477e-07	0.0425187	1.00196e-07	0.00030258	5.11763e-08	3.74858e-08	0.00504116	0.00496861	6.98728e-06	2.41394e-06	1.17616e-06	0.000381031	9.27449e-05	6.16771e-05
H8	2.35302e-05	5.35785e-06	4.40993e-06	0.00495312	1.16019e-07	0.000310046	1.00196e-07	0.00430894	1.05994e-08	3.83339e-05	6.96536e-05	6.38871e-09	1.07372e-08	0.00020989	4.62227e-05	2.21508e-05	4.24491e-07	1.02856e-07	6.00987e-08
H9	4.50313e-06	6.70962e-05	3.49434e-06	6.63561e-08	0.00493636	5.2607e-08	0.00030258	1.05994e-08	0.00429923	3.02369e-09	3.28467e-09	3.79053e-05	6.89883e-05	4.58132e-07	1.12765e-07	8.46449e-08	0.000207514	1.50447e-05	5.08916e-05
H10	1.03869e-05	3.26715e-06	3.91726e-06	0.000313472	7.95913e-08	0.00503201	5.11763e-08	3.83339e-05	3.02369e-09	0.00424983	0.00017068	1.8489e-09	5.26554e-09	6.59943e-05	4.46385e-06	8.44374e-06	8.21175e-07	2.17597e-07	3.1868e-08
H11	9.59208e-06	2.70002e-06	2.41279e-05	0.000305842	5.17576e-08	0.00498247	3.74858e-08	6.96536e-05	3.28467e-09	0.00017068	0.00417464	2.23178e-09	1.31548e-08	6.36741e-05	3.4337e-05	4.57337e-06	3.22738e-07	1.135e-07	4.6673e-08
H12	3.06282e-06	1.62069e-05	2.85752e-06	4.64648e-08	0.000316216	1.26292e-08	0.00504116	6.38871e-09	3.79053e-05	1.8489e-09	2.23178e-09	0.00428937	0.000170503	2.45529e-07	1.13514e-07	7.77392e-08	6.58623e-05	8.33954e-06	4.27464e-06
H13	1.01412e-05	1.33383e-05	4.67443e-05	1.71667e-07	0.000306446	8.36604e-08	0.00496861	1.07372e-08	6.89883e-05	5.26554e-09	1.31548e-08	0.000170503	0.00413336	1.1867e-06	1.70132e-07	2.02397e-07	6.27096e-05	4.83351e-06	3.79862e-05
C14	0.00481323	0.00040177	0.000640748	0.00539906	1.22286e-05	0.000391468	6.98728e-06	0.00020989	4.58132e-07	6.59943e-05	6.36741e-05	2.45529e-07	1.1867e-06	0.042373	0.00477882	0.00484722	4.83152e-05	7.43671e-06	3.81609e-06
H15	0.000254632	0.000102334	7.23636e-05	0.000181906	2.50206e-06	6.82965e-05	2.41394e-06	4.62227e-05	1.12765e-07	4.46385e-06	3.4337e-05	1.13514e-07	1.70132e-07	0.00477882	0.00389497	0.000146679	3.5792e-06	2.23559e-07	3.82712e-07
H16	0.000209297	0.000110421	8.32884e-05	0.000188662	9.38903e-07	7.53189e-05	1.17616e-06	2.21508e-05	8.46449e-08	8.44374e-06	4.57337e-06	7.77392e-08	2.02397e-07	0.00484722	0.000146679	0.0040919	1.03116e-05	5.77781e-07	1.41185e-06
C17	0.000235477	0.00557839	0.000118972	1.31621e-05	0.005366	5.7585e-06	0.000381031	4.24491e-07	0.000207514	8.21175e-07	3.22738e-07	6.58623e-05	6.27096e-05	4.83152e-05	3.5792e-06	1.03116e-05	0.0418423	0.00484122	0.00474268
H18	6.5995e-05	0.000285533	1.47749e-05	3.37048e-06	0.00019566	2.56307e-06	9.27449e-05	1.02856e-07	1.50447e-05	2.17597e-07	1.135e-07	8.33954e-06	4.83351e-06	7.43671e-06	2.23559e-07	5.77781e-07	0.00484122	0.00410134	0.000145369
H19	3.55111e-05	0.000297422	0.000134788	7.78406e-07	0.000181878	6.11135e-07	6.16771e-05	6.00987e-08	5.08916e-05	3.1868e-08	4.6673e-08	4.27464e-06	3.79862e-05	3.81609e-06	3.82712e-07	1.41185e-06	0.00474268	0.000145369	0.00384419
Weighted LDM — alliciin_conf_15_LIDI_matrix (× 0.0104167)
	S1	S2	O3	C4	C5	C6	C7	H8	H9	H10	H11	H12	H13	C14	H15	H16	C17	H18	H19	Total
S1	0.134883	0.00530678	0.00724011	0.000329443	2.52492e-05	0.000215039	1.14296e-05	1.61975e-05	1.1392e-05	9.80513e-06	1.25508e-05	1.03212e-06	1.30103e-06	0.00483026	0.000233578	0.000251853	0.000254253	7.46771e-05	4.89111e-05	0.895819
S2	0.00530678	0.153822	0.000993886	0.000161422	0.000434507	3.78898e-05	0.000254029	0.000139639	1.77513e-05	1.59611e-06	4.21259e-06	1.56026e-05	1.39115e-05	0.000377036	8.48366e-05	5.38529e-05	0.00558641	0.000293969	0.000291674
O3	0.00724011	0.000993886	0.0862951	0.000103016	5.08162e-05	6.38861e-05	9.52153e-06	5.64742e-06	6.46088e-05	5.16569e-06	3.84379e-06	9.79544e-07	2.51615e-06	0.000642502	4.92518e-05	5.51067e-05	0.000208119	2.00056e-05	0.000232259
C4	0.000329443	0.000161422	0.000103016	0.0414822	3.09753e-06	0.00956924	9.95035e-07	0.00488459	2.91014e-06	0.000310889	0.000314244	5.1729e-08	9.46217e-08	0.00540465	0.000186514	0.000181346	7.58582e-06	8.58344e-07	1.75196e-06
C5	2.52492e-05	0.000434507	5.08162e-05	3.09753e-06	0.0413493	1.36389e-06	0.00960044	2.62977e-06	0.00487005	2.10346e-07	1.64748e-07	0.000316909	0.000316921	3.56027e-05	2.41798e-06	8.06952e-05	0.00536262	0.000189977	0.000185108
C6	0.000215039	3.78898e-05	6.38861e-05	0.00956924	1.36389e-06	0.0425073	1.29412e-06	0.000295757	2.01145e-06	0.00503048	0.00501121	5.51784e-08	9.03124e-08	0.000399519	7.04232e-05	7.58992e-05	3.87967e-06	2.2776e-07	7.19005e-07
C7	1.14296e-05	0.000254029	9.52153e-06	9.95035e-07	0.00960044	1.29412e-06	0.0425463	1.30627e-06	0.000304066	9.65255e-08	1.00896e-07	0.00504217	0.0050167	8.44722e-06	5.88682e-07	1.91247e-05	0.000382155	6.74152e-05	7.0967e-05
H8	1.61975e-05	0.000139639	5.64742e-06	0.00488459	2.62977e-06	0.000295757	1.30627e-06	0.00408769	2.65823e-07	3.7131e-05	6.8169e-05	5.06976e-08	5.95724e-08	0.000197877	4.63151e-05	1.92086e-05	4.52688e-06	3.21242e-07	1.60369e-06
H9	1.1392e-05	1.77513e-05	6.46088e-05	2.91014e-06	0.00487005	2.01145e-06	0.000304066	2.65823e-07	0.00418724	2.58423e-07	9.49936e-08	3.77366e-05	6.88571e-05	4.1804e-05	1.84306e-06	8.23393e-05	0.000197409	4.79241e-05	1.81519e-05
H10	9.80513e-06	1.59611e-06	5.16569e-06	0.000310889	2.10346e-07	0.00503048	9.65255e-08	3.7131e-05	2.58423e-07	0.00422694	0.000174088	6.45215e-09	1.1476e-08	6.64677e-05	4.87595e-06	8.1653e-06	1.46229e-07	5.8202e-09	3.06166e-08
H11	1.25508e-05	4.21259e-06	3.84379e-06	0.000314244	1.64748e-07	0.00501121	1.00896e-07	6.8169e-05	9.49936e-08	0.000174088	0.0042883	5.81443e-09	7.32493e-09	6.55945e-05	3.71509e-05	4.73278e-06	3.33615e-07	5.0636e-08	5.94508e-08
H12	1.03212e-06	1.56026e-05	9.79544e-07	5.1729e-08	0.000316909	5.51784e-08	0.00504217	5.06976e-08	3.77366e-05	6.45215e-09	5.81443e-09	0.00428346	0.000176934	5.26399e-07	3.50312e-08	9.64001e-07	6.63543e-05	4.6913e-06	7.81856e-06
H13	1.30103e-06	1.39115e-05	2.51615e-06	9.46217e-08	0.000316921	9.03124e-08	0.0050167	5.95724e-08	6.88571e-05	1.1476e-08	7.32493e-09	0.000176934	0.0043235	9.36424e-07	8.7258e-08	1.83179e-06	6.45328e-05	3.80583e-05	4.24795e-06
C14	0.00483026	0.000377036	0.000642502	0.00540465	3.56027e-05	0.000399519	8.44722e-06	0.000197877	4.1804e-05	6.64677e-05	6.55945e-05	5.26399e-07	9.36424e-07	0.0423249	0.00482079	0.0047648	1.36586e-05	3.88899e-06	2.14172e-06
H15	0.000233578	8.48366e-05	4.92518e-05	0.000186514	2.41798e-06	7.04232e-05	5.88682e-07	4.63151e-05	1.84306e-06	4.87595e-06	3.71509e-05	3.50312e-08	8.7258e-08	0.00482079	0.00408713	0.00014606	3.15273e-06	2.15382e-06	3.27238e-07
H16	0.000251853	5.38529e-05	5.51067e-05	0.000181346	8.06952e-05	7.58992e-05	1.91247e-05	1.92086e-05	8.23393e-05	8.1653e-06	4.73278e-06	9.64001e-07	1.83179e-06	0.0047648	0.00014606	0.00392648	6.77036e-06	1.00838e-06	6.62236e-07
C17	0.000254253	0.00558641	0.000208119	7.58582e-06	0.00536262	3.87967e-06	0.000382155	4.52688e-06	0.000197409	1.46229e-07	3.33615e-07	6.63543e-05	6.45328e-05	1.36586e-05	3.15273e-06	6.77036e-06	0.0418617	0.0048244	0.00467384
H18	7.46771e-05	0.000293969	2.00056e-05	8.58344e-07	0.000189977	2.2776e-07	6.74152e-05	3.21242e-07	4.79241e-05	5.8202e-09	5.0636e-08	4.6913e-06	3.80583e-05	3.88899e-06	2.15382e-06	1.00838e-06	0.0048244	0.00408559	0.000138356
H19	4.89111e-05	0.000291674	0.000232259	1.75196e-06	0.000185108	7.19005e-07	7.0967e-05	1.60369e-06	1.81519e-05	3.06166e-08	5.94508e-08	7.81856e-06	4.24795e-06	2.14172e-06	3.27238e-07	6.62236e-07	0.00467384	0.000138356	0.00366133
Weighted LDM — alliciin_conf_16_LIDI_matrix (× 0.0104167)
	S1	S2	O3	C4	C5	C6	C7	H8	H9	H10	H11	H12	H13	C14	H15	H16	C17	H18	H19	Total
S1	0.135041	0.00533496	0.00724245	0.000325154	2.71752e-05	0.000185543	1.11783e-05	3.2231e-05	1.25391e-05	9.73487e-06	9.49985e-06	9.65183e-07	1.30866e-06	0.00481069	0.000242512	0.000233764	0.000256168	7.68099e-05	4.48101e-05	0.895823
S2	0.00533496	0.153652	0.000989122	0.000133199	0.000425671	0.000165231	0.000251463	5.479e-06	1.65195e-05	4.54558e-06	7.10304e-05	1.55735e-05	1.41092e-05	0.000383564	7.77021e-05	7.81502e-05	0.00557842	0.000292661	0.000293682
O3	0.00724245	0.000989122	0.0862949	9.62776e-05	6.58439e-05	6.05085e-05	1.04889e-05	5.49217e-06	8.79585e-05	5.55422e-06	3.36434e-06	1.01175e-06	2.94658e-06	0.000639591	3.92135e-05	6.70982e-05	0.000205843	2.00985e-05	0.000209666
C4	0.000325154	0.000133199	9.62776e-05	0.0414987	3.49134e-06	0.00953977	1.20662e-06	0.00494821	3.46036e-06	0.000312692	0.000302146	6.2308e-08	1.10998e-07	0.00542292	0.000176834	0.000193002	7.75026e-06	7.70016e-07	1.79241e-06
C5	2.71752e-05	0.000425671	6.58439e-05	3.49134e-06	0.0413639	2.90983e-06	0.00959274	1.5909e-06	0.00485772	2.40846e-07	6.72342e-06	0.000317124	0.000316746	4.14459e-05	9.3214e-05	2.26519e-06	0.00535769	0.0001898	0.000186301
C6	0.000185543	0.000165231	6.05085e-05	0.00953977	2.90983e-06	0.04239	2.77555e-06	0.000309532	6.65174e-07	0.00503069	0.00496839	7.8574e-08	7.73929e-08	0.000390486	6.26442e-05	8.40943e-05	7.06744e-06	3.3388e-07	1.89002e-06
C7	1.11783e-05	0.000251463	1.04889e-05	1.20662e-06	0.00959274	2.77555e-06	0.042569	8.01642e-07	0.000299825	2.65475e-07	5.77056e-06	0.00504341	0.00501793	1.15555e-05	2.7512e-05	6.17897e-07	0.000381639	6.75927e-05	7.11038e-05
H8	3.2231e-05	5.479e-06	5.49217e-06	0.00494821	1.5909e-06	0.000309532	8.01642e-07	0.00429438	1.28222e-06	3.83369e-05	6.90322e-05	2.97244e-08	4.51256e-08	0.000209012	4.67488e-05	1.98108e-05	5.44099e-07	1.07829e-07	7.75089e-08
H9	1.25391e-05	1.65195e-05	8.79585e-05	3.46036e-06	0.00485772	6.65174e-07	0.000299825	1.28222e-06	0.00412826	3.36389e-08	4.20142e-07	3.7449e-05	6.84439e-05	3.76771e-05	6.91762e-05	1.37483e-06	0.000194911	4.75618e-05	1.80095e-05
H10	9.73487e-06	4.54558e-06	5.55422e-06	0.000312692	2.40846e-07	0.00503069	2.65475e-07	3.83369e-05	3.36389e-08	0.00424397	0.000169588	5.68455e-09	4.12033e-09	6.55961e-05	4.19918e-06	8.17565e-06	1.84629e-07	8.97841e-09	5.67262e-08
H11	9.49985e-06	7.10304e-05	3.36434e-06	0.000302146	6.72342e-06	0.00496839	5.77056e-06	6.90322e-05	4.20142e-07	0.000169588	0.00414883	1.93865e-07	1.72953e-07	6.16273e-05	3.29979e-05	4.79983e-06	1.67634e-06	9.10871e-08	8.66266e-07
H12	9.65183e-07	1.55735e-05	1.01175e-06	6.2308e-08	0.000317124	7.8574e-08	0.00504341	2.97244e-08	3.7449e-05	5.68455e-09	1.93865e-07	0.00428663	0.000177332	5.89854e-07	1.17975e-06	3.54264e-08	6.65512e-05	4.70557e-06	7.96943e-06
H13	1.30866e-06	1.41092e-05	2.94658e-06	1.10998e-07	0.000316746	7.73929e-08	0.00501793	4.51256e-08	6.84439e-05	4.12033e-09	1.72953e-07	0.000177332	0.0043269	9.22944e-07	1.6788e-06	6.85383e-08	6.43082e-05	3.78588e-05	4.26414e-06
C14	0.00481069	0.000383564	0.000639591	0.00542292	4.14459e-05	0.000390486	1.15555e-05	0.000209012	3.76771e-05	6.55961e-05	6.16273e-05	5.89854e-07	9.22944e-07	0.0423355	0.00474913	0.00482658	1.37519e-05	3.69539e-06	2.20826e-06
H15	0.000242512	7.77021e-05	3.92135e-05	0.000176834	9.3214e-05	6.26442e-05	2.7512e-05	4.67488e-05	6.91762e-05	4.19918e-06	3.29979e-05	1.17975e-06	1.6788e-06	0.00474913	0.00389233	0.000145255	7.52982e-06	1.12704e-06	7.49553e-07
H16	0.000233764	7.81502e-05	6.70982e-05	0.000193002	2.26519e-06	8.40943e-05	6.17897e-07	1.98108e-05	1.37483e-06	8.17565e-06	4.79983e-06	3.54264e-08	6.85383e-08	0.00482658	0.000145255	0.0040618	2.81932e-06	1.78825e-06	2.65391e-07
C17	0.000256168	0.00557842	0.000205843	7.75026e-06	0.00535769	7.06744e-06	0.000381639	5.44099e-07	0.000194911	1.84629e-07	1.67634e-06	6.65512e-05	6.43082e-05	1.37519e-05	7.52982e-06	2.81932e-06	0.041836	0.00482402	0.00469293
H18	7.68099e-05	0.000292661	2.00985e-05	7.70016e-07	0.0001898	3.3388e-07	6.75927e-05	1.07829e-07	4.75618e-05	8.97841e-09	9.10871e-08	4.70557e-06	3.78588e-05	3.69539e-06	1.12704e-06	1.78825e-06	0.00482402	0.00409357	0.000139757
H19	4.48101e-05	0.000293682	0.000209666	1.79241e-06	0.000186301	1.89002e-06	7.11038e-05	7.75089e-08	1.80095e-05	5.67262e-08	8.66266e-07	7.96943e-06	4.26414e-06	2.20826e-06	7.49553e-07	2.65391e-07	0.00469293	0.000139757	0.00370184
Weighted LDM — alliciin_conf_17_LIDI_matrix (× 0.0104167)
	S1	S2	O3	C4	C5	C6	C7	H8	H9	H10	H11	H12	H13	C14	H15	H16	C17	H18	H19	Total
S1	0.134746	0.00542153	0.00722804	0.000309404	6.87964e-05	0.0002017	3.64707e-05	1.67753e-05	4.90175e-06	1.06206e-05	9.59515e-06	2.887e-06	2.66428e-06	0.00481798	0.000230488	0.000255763	0.000259141	1.66781e-05	6.67203e-05	0.895837
S2	0.00542153	0.153634	0.00102755	0.00017185	0.000430028	3.87117e-05	0.000212895	0.000146708	3.97912e-05	4.15391e-06	1.61121e-06	1.35546e-05	1.18534e-05	0.000372246	8.55736e-05	3.95154e-05	0.00555871	0.000323517	0.000263743
O3	0.00722804	0.00102755	0.0863696	0.000102576	1.85154e-05	6.17138e-05	1.0705e-05	6.31213e-06	7.28206e-06	3.68715e-06	5.36404e-06	7.36642e-07	4.07405e-06	0.000660322	5.40402e-05	6.64102e-05	0.000169102	7.75839e-06	0.000270086
C4	0.000309404	0.00017185	0.000102576	0.0414561	1.3238e-06	0.00957679	8.11102e-07	0.00488723	8.81374e-08	0.000314483	0.000311406	8.17133e-08	5.26241e-08	0.00541251	0.000184699	0.000184102	6.32203e-06	3.89403e-06	1.35984e-06
C5	6.87964e-05	0.000430028	1.85154e-05	1.3238e-06	0.0413668	3.31676e-07	0.00961551	7.96509e-07	0.00494762	6.24912e-08	3.89273e-08	0.000317156	0.000312358	7.1928e-06	1.28368e-06	7.47989e-06	0.00535745	0.00020565	0.000167953
C6	0.0002017	3.87117e-05	6.17138e-05	0.00957679	3.31676e-07	0.0424963	4.80965e-07	0.000296158	6.55763e-08	0.00501012	0.00503063	3.37616e-08	3.35784e-08	0.00040052	6.90359e-05	8.22733e-05	4.14628e-06	1.04865e-06	7.67514e-07
C7	3.64707e-05	0.000212895	1.0705e-05	8.11102e-07	0.00961551	4.80965e-07	0.0424541	5.72689e-07	0.000311046	6.72907e-08	2.37127e-08	0.00503695	0.00499521	2.35768e-06	1.18318e-06	1.93207e-06	0.000388164	8.77524e-05	6.52334e-05
H8	1.67753e-05	0.000146708	6.31213e-06	0.00488723	7.96509e-07	0.000296158	5.72689e-07	0.00412804	4.42725e-08	6.83087e-05	3.73391e-05	5.60704e-08	2.98325e-08	0.000199241	4.78697e-05	1.7683e-05	5.26564e-06	3.81394e-06	6.35371e-07
H9	4.90175e-06	3.97912e-05	7.28206e-06	8.81374e-08	0.00494762	6.55763e-08	0.000311046	4.42725e-08	0.00433373	3.72798e-09	5.2256e-09	3.81145e-05	7.00752e-05	4.30839e-07	1.16208e-07	5.10049e-07	0.00020985	1.60164e-05	4.67403e-05
H10	1.06206e-05	4.15391e-06	3.68715e-06	0.000314483	6.24912e-08	0.00501012	6.72907e-08	6.83087e-05	3.72798e-09	0.00428532	0.000173831	5.31252e-09	3.46471e-09	6.61185e-05	3.87705e-05	4.90391e-06	3.76699e-07	2.49889e-07	4.67813e-08
H11	9.59515e-06	1.61121e-06	5.36404e-06	0.000311406	3.89273e-08	0.00503063	2.37127e-08	3.73391e-05	5.2256e-09	0.000173831	0.00422798	2.89981e-09	1.97854e-09	6.60577e-05	4.84622e-06	8.39036e-06	2.9421e-07	1.38431e-07	7.40996e-08
H12	2.887e-06	1.35546e-05	7.36642e-07	8.17133e-08	0.000317156	3.37616e-08	0.00503695	5.60704e-08	3.81145e-05	5.31252e-09	2.89981e-09	0.00427575	0.000172929	2.86288e-07	6.13096e-08	3.53958e-07	6.60319e-05	8.41672e-06	4.90352e-06
H13	2.66428e-06	1.18534e-05	4.07405e-06	5.26241e-08	0.000312358	3.35784e-08	0.00499521	2.98325e-08	7.00752e-05	3.46471e-09	1.97854e-09	0.000172929	0.00421996	2.15579e-07	4.68823e-08	1.54714e-07	6.57407e-05	5.00451e-06	4.03282e-05
C14	0.00481798	0.000372246	0.000660322	0.00541251	7.1928e-06	0.00040052	2.35768e-06	0.000199241	4.30839e-07	6.61185e-05	6.60577e-05	2.86288e-07	2.15579e-07	0.0422853	0.00481204	0.004789	4.72859e-05	2.76119e-05	8.61504e-06
H15	0.000230488	8.55736e-05	5.40402e-05	0.000184699	1.28368e-06	6.90359e-05	1.18318e-06	4.78697e-05	1.16208e-07	3.87705e-05	4.84622e-06	6.13096e-08	4.68823e-08	0.00481204	0.00405741	0.00014931	3.78417e-06	2.26907e-06	6.00554e-07
H16	0.000255763	3.95154e-05	6.64102e-05	0.000184102	7.47989e-06	8.22733e-05	1.93207e-06	1.7683e-05	5.10049e-07	4.90391e-06	8.39036e-06	3.53958e-07	1.54714e-07	0.004789	0.00014931	0.00400277	5.8549e-05	4.41896e-05	1.43948e-05
C17	0.000259141	0.00555871	0.000169102	6.32203e-06	0.00535745	4.14628e-06	0.000388164	5.26564e-06	0.00020985	3.76699e-07	2.9421e-07	6.60319e-05	6.57407e-05	4.72859e-05	3.78417e-06	5.8549e-05	0.0419293	0.00486504	0.00462728
H18	1.66781e-05	0.000323517	7.75839e-06	3.89403e-06	0.00020565	1.04865e-06	8.77524e-05	3.81394e-06	1.60164e-05	2.49889e-07	1.38431e-07	8.41672e-06	5.00451e-06	2.76119e-05	2.26907e-06	4.41896e-05	0.00486504	0.00424013	0.000145729
H19	6.67203e-05	0.000263743	0.000270086	1.35984e-06	0.000167953	7.67514e-07	6.52334e-05	6.35371e-07	4.67403e-05	4.67813e-08	7.40996e-08	4.90352e-06	4.03282e-05	8.61504e-06	6.00554e-07	1.43948e-05	0.00462728	0.000145729	0.00363037
Weighted LDM — alliciin_conf_18_LIDI_matrix (× 0.0104167)
	S1	S2	O3	C4	C5	C6	C7	H8	H9	H10	H11	H12	H13	C14	H15	H16	C17	H18	H19	Total
S1	0.134936	0.00531815	0.0072314	0.000337408	2.59055e-05	0.000193869	1.16161e-05	1.88225e-05	1.23882e-05	8.64209e-06	1.0395e-05	1.32691e-06	1.01168e-06	0.00484927	0.000222295	0.000253627	0.000251258	4.63543e-05	7.47263e-05	0.89584
S2	0.00531815	0.154009	0.000987775	8.83885e-05	0.000428467	3.83369e-05	0.000250897	4.37701e-06	1.72172e-05	2.24054e-06	4.71441e-06	1.34365e-05	1.57267e-05	0.000415318	8.08441e-05	8.21859e-05	0.00558626	0.000297371	0.000292708
O3	0.0072314	0.000987775	0.0862469	0.000113947	6.31506e-05	3.85741e-05	1.04356e-05	6.42057e-05	8.50831e-05	4.24968e-06	2.29504e-06	2.80439e-06	1.02668e-06	0.000633513	8.53669e-05	4.69456e-05	0.000203705	0.000212575	1.96946e-05
C4	0.000337408	8.83885e-05	0.000113947	0.0414989	2.94182e-06	0.00959287	8.46765e-07	0.00489824	2.16665e-06	0.000316672	0.000312203	9.81166e-08	5.15477e-08	0.00539027	0.000182	0.000184166	4.41123e-06	5.14537e-07	2.24479e-06
C5	2.59055e-05	0.000428467	6.31506e-05	2.94182e-06	0.0413554	2.68838e-06	0.00959759	3.81961e-07	0.00486158	1.31601e-07	2.66715e-07	0.000316897	0.000316879	3.87536e-05	2.37639e-06	8.93225e-05	0.00536093	0.000185961	0.000189225
C6	0.000193869	3.83369e-05	3.85741e-05	0.00959287	2.68838e-06	0.0424956	1.16644e-06	0.000296297	1.80223e-06	0.00501296	0.00503051	1.00007e-07	5.82906e-08	0.000399891	6.6281e-05	9.17663e-05	2.20376e-06	1.66927e-07	1.33579e-06
C7	1.16161e-05	0.000250897	1.04356e-05	8.46765e-07	0.00959759	1.16644e-06	0.0425446	6.7437e-08	0.000301152	5.65134e-08	9.37563e-08	0.00501735	0.00504175	9.85661e-06	6.04524e-07	2.46047e-05	0.00038395	7.29298e-05	6.73809e-05
H8	1.88225e-05	4.37701e-06	6.42057e-05	0.00489824	3.81961e-07	0.000296297	6.7437e-08	0.00411137	6.95562e-07	6.88122e-05	3.72229e-05	3.45891e-08	1.23722e-08	0.000198628	5.15306e-05	1.40885e-05	4.14866e-07	1.21007e-07	8.32411e-08
H9	1.23882e-05	1.72172e-05	8.50831e-05	2.16665e-06	0.00486158	1.80223e-06	0.000301152	6.95562e-07	0.00415	1.31958e-07	1.8152e-07	6.84491e-05	3.75068e-05	3.86151e-05	2.68665e-06	7.29279e-05	0.000196078	1.75235e-05	4.81578e-05
H10	8.64209e-06	2.24054e-06	4.24968e-06	0.000316672	1.31601e-07	0.00501296	5.65134e-08	6.88122e-05	1.31958e-07	0.00430137	0.000174523	6.01233e-09	3.51761e-09	6.6516e-05	4.11793e-05	4.69459e-06	1.29423e-07	1.39464e-08	6.59608e-08
H11	1.0395e-05	4.71441e-06	2.29504e-06	0.000312203	2.66715e-07	0.00503051	9.37563e-08	3.72229e-05	1.8152e-07	0.000174523	0.0042318	1.1118e-08	5.71899e-09	6.62647e-05	4.73027e-06	7.6837e-06	1.6124e-07	1.2486e-08	1.16037e-07
H12	1.32691e-06	1.34365e-05	2.80439e-06	9.81166e-08	0.000316897	1.00007e-07	0.00501735	3.45891e-08	6.84491e-05	6.01233e-09	1.1118e-08	0.00432347	0.000176899	9.06666e-07	6.98644e-08	1.71159e-06	6.46412e-05	4.28945e-06	3.85846e-05
H13	1.01168e-06	1.57267e-05	1.02668e-06	5.15477e-08	0.000316879	5.82906e-08	0.00504175	1.23722e-08	3.75068e-05	3.51761e-09	5.71899e-09	0.000176899	0.00428186	5.51683e-07	3.82775e-08	1.07975e-06	6.64478e-05	7.87856e-06	4.70852e-06
C14	0.00484927	0.000415318	0.000633513	0.00539027	3.87536e-05	0.000399891	9.85661e-06	0.000198628	3.86151e-05	6.6516e-05	6.62647e-05	9.06666e-07	5.51683e-07	0.0423155	0.00482709	0.00474043	1.51223e-05	2.673e-06	3.46356e-06
H15	0.000222295	8.08441e-05	8.53669e-05	0.000182	2.37639e-06	6.6281e-05	6.04524e-07	5.15306e-05	2.68665e-06	4.11793e-05	4.73027e-06	6.98644e-08	3.82775e-08	0.00482709	0.00409471	0.000144238	4.32463e-06	1.34765e-06	3.7671e-07
H16	0.000253627	8.21859e-05	4.69456e-05	0.000184166	8.93225e-05	9.17663e-05	2.46047e-05	1.40885e-05	7.29279e-05	4.69459e-06	7.6837e-06	1.71159e-06	1.07975e-06	0.00474043	0.000144238	0.00388017	7.36547e-06	8.4927e-07	9.60822e-07
C17	0.000251258	0.00558626	0.000203705	4.41123e-06	0.00536093	2.20376e-06	0.00038395	4.14866e-07	0.000196078	1.29423e-07	1.6124e-07	6.46412e-05	6.64478e-05	1.51223e-05	4.32463e-06	7.36547e-06	0.0418296	0.00468731	0.00482371
H18	4.63543e-05	0.000297371	0.000212575	5.14537e-07	0.000185961	1.66927e-07	7.29298e-05	1.21007e-07	1.75235e-05	1.39464e-08	1.2486e-08	4.28945e-06	7.87856e-06	2.673e-06	1.34765e-06	8.4927e-07	0.00468731	0.00369456	0.000139446
H19	7.47263e-05	0.000292708	1.96946e-05	2.24479e-06	0.000189225	1.33579e-06	6.73809e-05	8.32411e-08	4.81578e-05	6.59608e-08	1.16037e-07	3.85846e-05	4.70852e-06	3.46356e-06	3.7671e-07	9.60822e-07	0.00482371	0.000139446	0.00408697
Weighted LDM — alliciin_conf_19_LIDI_matrix (× 0)
	S1	S2	O3	C4	C5	C6	C7	H8	H9	H10	H11	H12	H13	C14	H15	H16	C17	H18	H19	Total
S1	0	0	0	0	0	0	0	0	0	0	0	0	0	0	0	0	0	0	0	0
S2	0	0	0	0	0	0	0	0	0	0	0	0	0	0	0	0	0	0	0
O3	0	0	0	0	0	0	0	0	0	0	0	0	0	0	0	0	0	0	0
C4	0	0	0	0	0	0	0	0	0	0	0	0	0	0	0	0	0	0	0
C5	0	0	0	0	0	0	0	0	0	0	0	0	0	0	0	0	0	0	0
C6	0	0	0	0	0	0	0	0	0	0	0	0	0	0	0	0	0	0	0
C7	0	0	0	0	0	0	0	0	0	0	0	0	0	0	0	0	0	0	0
H8	0	0	0	0	0	0	0	0	0	0	0	0	0	0	0	0	0	0	0
H9	0	0	0	0	0	0	0	0	0	0	0	0	0	0	0	0	0	0	0
H10	0	0	0	0	0	0	0	0	0	0	0	0	0	0	0	0	0	0	0
H11	0	0	0	0	0	0	0	0	0	0	0	0	0	0	0	0	0	0	0
H12	0	0	0	0	0	0	0	0	0	0	0	0	0	0	0	0	0	0	0
H13	0	0	0	0	0	0	0	0	0	0	0	0	0	0	0	0	0	0	0
C14	0	0	0	0	0	0	0	0	0	0	0	0	0	0	0	0	0	0	0
H15	0	0	0	0	0	0	0	0	0	0	0	0	0	0	0	0	0	0	0
H16	0	0	0	0	0	0	0	0	0	0	0	0	0	0	0	0	0	0	0
C17	0	0	0	0	0	0	0	0	0	0	0	0	0	0	0	0	0	0	0
H18	0	0	0	0	0	0	0	0	0	0	0	0	0	0	0	0	0	0	0
H19	0	0	0	0	0	0	0	0	0	0	0	0	0	0	0	0	0	0	0
Weighted LDM — alliciin_conf_20_LIDI_matrix (× 0)
	S1	S2	O3	C4	C5	C6	C7	H8	H9	H10	H11	H12	H13	C14	H15	H16	C17	H18	H19	Total
S1	0	0	0	0	0	0	0	0	0	0	0	0	0	0	0	0	0	0	0	0
S2	0	0	0	0	0	0	0	0	0	0	0	0	0	0	0	0	0	0	0
O3	0	0	0	0	0	0	0	0	0	0	0	0	0	0	0	0	0	0	0
C4	0	0	0	0	0	0	0	0	0	0	0	0	0	0	0	0	0	0	0
C5	0	0	0	0	0	0	0	0	0	0	0	0	0	0	0	0	0	0	0
C6	0	0	0	0	0	0	0	0	0	0	0	0	0	0	0	0	0	0	0
C7	0	0	0	0	0	0	0	0	0	0	0	0	0	0	0	0	0	0	0
H8	0	0	0	0	0	0	0	0	0	0	0	0	0	0	0	0	0	0	0
H9	0	0	0	0	0	0	0	0	0	0	0	0	0	0	0	0	0	0	0
H10	0	0	0	0	0	0	0	0	0	0	0	0	0	0	0	0	0	0	0
H11	0	0	0	0	0	0	0	0	0	0	0	0	0	0	0	0	0	0	0
H12	0	0	0	0	0	0	0	0	0	0	0	0	0	0	0	0	0	0	0
H13	0	0	0	0	0	0	0	0	0	0	0	0	0	0	0	0	0	0	0
C14	0	0	0	0	0	0	0	0	0	0	0	0	0	0	0	0	0	0	0
H15	0	0	0	0	0	0	0	0	0	0	0	0	0	0	0	0	0	0	0
H16	0	0	0	0	0	0	0	0	0	0	0	0	0	0	0	0	0	0	0
C17	0	0	0	0	0	0	0	0	0	0	0	0	0	0	0	0	0	0	0
H18	0	0	0	0	0	0	0	0	0	0	0	0	0	0	0	0	0	0	0
H19	0	0	0	0	0	0	0	0	0	0	0	0	0	0	0	0	0	0	0
Weighted LDM — alliciin_conf_21_LIDI_matrix (× 0)
	S1	S2	O3	C4	C5	C6	C7	H8	H9	H10	H11	H12	H13	C14	H15	H16	C17	H18	H19	Total
S1	0	0	0	0	0	0	0	0	0	0	0	0	0	0	0	0	0	0	0	0
S2	0	0	0	0	0	0	0	0	0	0	0	0	0	0	0	0	0	0	0
O3	0	0	0	0	0	0	0	0	0	0	0	0	0	0	0	0	0	0	0
C4	0	0	0	0	0	0	0	0	0	0	0	0	0	0	0	0	0	0	0
C5	0	0	0	0	0	0	0	0	0	0	0	0	0	0	0	0	0	0	0
C6	0	0	0	0	0	0	0	0	0	0	0	0	0	0	0	0	0	0	0
C7	0	0	0	0	0	0	0	0	0	0	0	0	0	0	0	0	0	0	0
H8	0	0	0	0	0	0	0	0	0	0	0	0	0	0	0	0	0	0	0
H9	0	0	0	0	0	0	0	0	0	0	0	0	0	0	0	0	0	0	0
H10	0	0	0	0	0	0	0	0	0	0	0	0	0	0	0	0	0	0	0
H11	0	0	0	0	0	0	0	0	0	0	0	0	0	0	0	0	0	0	0
H12	0	0	0	0	0	0	0	0	0	0	0	0	0	0	0	0	0	0	0
H13	0	0	0	0	0	0	0	0	0	0	0	0	0	0	0	0	0	0	0
C14	0	0	0	0	0	0	0	0	0	0	0	0	0	0	0	0	0	0	0
H15	0	0	0	0	0	0	0	0	0	0	0	0	0	0	0	0	0	0	0
H16	0	0	0	0	0	0	0	0	0	0	0	0	0	0	0	0	0	0	0
C17	0	0	0	0	0	0	0	0	0	0	0	0	0	0	0	0	0	0	0
H18	0	0	0	0	0	0	0	0	0	0	0	0	0	0	0	0	0	0	0
H19	0	0	0	0	0	0	0	0	0	0	0	0	0	0	0	0	0	0	0
Weighted LDM — alliciin_conf_22_LIDI_matrix (× 0)
	S1	S2	O3	C4	C5	C6	C7	H8	H9	H10	H11	H12	H13	C14	H15	H16	C17	H18	H19	Total
S1	0	0	0	0	0	0	0	0	0	0	0	0	0	0	0	0	0	0	0	0
S2	0	0	0	0	0	0	0	0	0	0	0	0	0	0	0	0	0	0	0
O3	0	0	0	0	0	0	0	0	0	0	0	0	0	0	0	0	0	0	0
C4	0	0	0	0	0	0	0	0	0	0	0	0	0	0	0	0	0	0	0
C5	0	0	0	0	0	0	0	0	0	0	0	0	0	0	0	0	0	0	0
C6	0	0	0	0	0	0	0	0	0	0	0	0	0	0	0	0	0	0	0
C7	0	0	0	0	0	0	0	0	0	0	0	0	0	0	0	0	0	0	0
H8	0	0	0	0	0	0	0	0	0	0	0	0	0	0	0	0	0	0	0
H9	0	0	0	0	0	0	0	0	0	0	0	0	0	0	0	0	0	0	0
H10	0	0	0	0	0	0	0	0	0	0	0	0	0	0	0	0	0	0	0
H11	0	0	0	0	0	0	0	0	0	0	0	0	0	0	0	0	0	0	0
H12	0	0	0	0	0	0	0	0	0	0	0	0	0	0	0	0	0	0	0
H13	0	0	0	0	0	0	0	0	0	0	0	0	0	0	0	0	0	0	0
C14	0	0	0	0	0	0	0	0	0	0	0	0	0	0	0	0	0	0	0
H15	0	0	0	0	0	0	0	0	0	0	0	0	0	0	0	0	0	0	0
H16	0	0	0	0	0	0	0	0	0	0	0	0	0	0	0	0	0	0	0
C17	0	0	0	0	0	0	0	0	0	0	0	0	0	0	0	0	0	0	0
H18	0	0	0	0	0	0	0	0	0	0	0	0	0	0	0	0	0	0	0
H19	0	0	0	0	0	0	0	0	0	0	0	0	0	0	0	0	0	0	0
Weighted LDM — alliciin_conf_23_LIDI_matrix (× 0)
	S1	S2	O3	C4	C5	C6	C7	H8	H9	H10	H11	H12	H13	C14	H15	H16	C17	H18	H19	Total
S1	0	0	0	0	0	0	0	0	0	0	0	0	0	0	0	0	0	0	0	0
S2	0	0	0	0	0	0	0	0	0	0	0	0	0	0	0	0	0	0	0
O3	0	0	0	0	0	0	0	0	0	0	0	0	0	0	0	0	0	0	0
C4	0	0	0	0	0	0	0	0	0	0	0	0	0	0	0	0	0	0	0
C5	0	0	0	0	0	0	0	0	0	0	0	0	0	0	0	0	0	0	0
C6	0	0	0	0	0	0	0	0	0	0	0	0	0	0	0	0	0	0	0
C7	0	0	0	0	0	0	0	0	0	0	0	0	0	0	0	0	0	0	0
H8	0	0	0	0	0	0	0	0	0	0	0	0	0	0	0	0	0	0	0
H9	0	0	0	0	0	0	0	0	0	0	0	0	0	0	0	0	0	0	0
H10	0	0	0	0	0	0	0	0	0	0	0	0	0	0	0	0	0	0	0
H11	0	0	0	0	0	0	0	0	0	0	0	0	0	0	0	0	0	0	0
H12	0	0	0	0	0	0	0	0	0	0	0	0	0	0	0	0	0	0	0
H13	0	0	0	0	0	0	0	0	0	0	0	0	0	0	0	0	0	0	0
C14	0	0	0	0	0	0	0	0	0	0	0	0	0	0	0	0	0	0	0
H15	0	0	0	0	0	0	0	0	0	0	0	0	0	0	0	0	0	0	0
H16	0	0	0	0	0	0	0	0	0	0	0	0	0	0	0	0	0	0	0
C17	0	0	0	0	0	0	0	0	0	0	0	0	0	0	0	0	0	0	0
H18	0	0	0	0	0	0	0	0	0	0	0	0	0	0	0	0	0	0	0
H19	0	0	0	0	0	0	0	0	0	0	0	0	0	0	0	0	0	0	0
Weighted LDM — alliciin_conf_24_LIDI_matrix (× 0)
	S1	S2	O3	C4	C5	C6	C7	H8	H9	H10	H11	H12	H13	C14	H15	H16	C17	H18	H19	Total
S1	0	0	0	0	0	0	0	0	0	0	0	0	0	0	0	0	0	0	0	0
S2	0	0	0	0	0	0	0	0	0	0	0	0	0	0	0	0	0	0	0
O3	0	0	0	0	0	0	0	0	0	0	0	0	0	0	0	0	0	0	0
C4	0	0	0	0	0	0	0	0	0	0	0	0	0	0	0	0	0	0	0
C5	0	0	0	0	0	0	0	0	0	0	0	0	0	0	0	0	0	0	0
C6	0	0	0	0	0	0	0	0	0	0	0	0	0	0	0	0	0	0	0
C7	0	0	0	0	0	0	0	0	0	0	0	0	0	0	0	0	0	0	0
H8	0	0	0	0	0	0	0	0	0	0	0	0	0	0	0	0	0	0	0
H9	0	0	0	0	0	0	0	0	0	0	0	0	0	0	0	0	0	0	0
H10	0	0	0	0	0	0	0	0	0	0	0	0	0	0	0	0	0	0	0
H11	0	0	0	0	0	0	0	0	0	0	0	0	0	0	0	0	0	0	0
H12	0	0	0	0	0	0	0	0	0	0	0	0	0	0	0	0	0	0	0
H13	0	0	0	0	0	0	0	0	0	0	0	0	0	0	0	0	0	0	0
C14	0	0	0	0	0	0	0	0	0	0	0	0	0	0	0	0	0	0	0
H15	0	0	0	0	0	0	0	0	0	0	0	0	0	0	0	0	0	0	0
H16	0	0	0	0	0	0	0	0	0	0	0	0	0	0	0	0	0	0	0
C17	0	0	0	0	0	0	0	0	0	0	0	0	0	0	0	0	0	0	0
H18	0	0	0	0	0	0	0	0	0	0	0	0	0	0	0	0	0	0	0
H19	0	0	0	0	0	0	0	0	0	0	0	0	0	0	0	0	0	0	0
Weighted LDM — alliciin_conf_25_LIDI_matrix (× 0)
	S1	S2	O3	C4	C5	C6	C7	H8	H9	H10	H11	H12	H13	C14	H15	H16	C17	H18	H19	Total
S1	0	0	0	0	0	0	0	0	0	0	0	0	0	0	0	0	0	0	0	0
S2	0	0	0	0	0	0	0	0	0	0	0	0	0	0	0	0	0	0	0
O3	0	0	0	0	0	0	0	0	0	0	0	0	0	0	0	0	0	0	0
C4	0	0	0	0	0	0	0	0	0	0	0	0	0	0	0	0	0	0	0
C5	0	0	0	0	0	0	0	0	0	0	0	0	0	0	0	0	0	0	0
C6	0	0	0	0	0	0	0	0	0	0	0	0	0	0	0	0	0	0	0
C7	0	0	0	0	0	0	0	0	0	0	0	0	0	0	0	0	0	0	0
H8	0	0	0	0	0	0	0	0	0	0	0	0	0	0	0	0	0	0	0
H9	0	0	0	0	0	0	0	0	0	0	0	0	0	0	0	0	0	0	0
H10	0	0	0	0	0	0	0	0	0	0	0	0	0	0	0	0	0	0	0
H11	0	0	0	0	0	0	0	0	0	0	0	0	0	0	0	0	0	0	0
H12	0	0	0	0	0	0	0	0	0	0	0	0	0	0	0	0	0	0	0
H13	0	0	0	0	0	0	0	0	0	0	0	0	0	0	0	0	0	0	0
C14	0	0	0	0	0	0	0	0	0	0	0	0	0	0	0	0	0	0	0
H15	0	0	0	0	0	0	0	0	0	0	0	0	0	0	0	0	0	0	0
H16	0	0	0	0	0	0	0	0	0	0	0	0	0	0	0	0	0	0	0
C17	0	0	0	0	0	0	0	0	0	0	0	0	0	0	0	0	0	0	0
H18	0	0	0	0	0	0	0	0	0	0	0	0	0	0	0	0	0	0	0
H19	0	0	0	0	0	0	0	0	0	0	0	0	0	0	0	0	0	0	0
Weighted LDM — alliciin_conf_26_LIDI_matrix (× 0)
	S1	S2	O3	C4	C5	C6	C7	H8	H9	H10	H11	H12	H13	C14	H15	H16	C17	H18	H19	Total
S1	0	0	0	0	0	0	0	0	0	0	0	0	0	0	0	0	0	0	0	0
S2	0	0	0	0	0	0	0	0	0	0	0	0	0	0	0	0	0	0	0
O3	0	0	0	0	0	0	0	0	0	0	0	0	0	0	0	0	0	0	0
C4	0	0	0	0	0	0	0	0	0	0	0	0	0	0	0	0	0	0	0
C5	0	0	0	0	0	0	0	0	0	0	0	0	0	0	0	0	0	0	0
C6	0	0	0	0	0	0	0	0	0	0	0	0	0	0	0	0	0	0	0
C7	0	0	0	0	0	0	0	0	0	0	0	0	0	0	0	0	0	0	0
H8	0	0	0	0	0	0	0	0	0	0	0	0	0	0	0	0	0	0	0
H9	0	0	0	0	0	0	0	0	0	0	0	0	0	0	0	0	0	0	0
H10	0	0	0	0	0	0	0	0	0	0	0	0	0	0	0	0	0	0	0
H11	0	0	0	0	0	0	0	0	0	0	0	0	0	0	0	0	0	0	0
H12	0	0	0	0	0	0	0	0	0	0	0	0	0	0	0	0	0	0	0
H13	0	0	0	0	0	0	0	0	0	0	0	0	0	0	0	0	0	0	0
C14	0	0	0	0	0	0	0	0	0	0	0	0	0	0	0	0	0	0	0
H15	0	0	0	0	0	0	0	0	0	0	0	0	0	0	0	0	0	0	0
H16	0	0	0	0	0	0	0	0	0	0	0	0	0	0	0	0	0	0	0
C17	0	0	0	0	0	0	0	0	0	0	0	0	0	0	0	0	0	0	0
H18	0	0	0	0	0	0	0	0	0	0	0	0	0	0	0	0	0	0	0
H19	0	0	0	0	0	0	0	0	0	0	0	0	0	0	0	0	0	0	0
Weighted LDM — alliciin_conf_27_LIDI_matrix (× 0)
	S1	S2	O3	C4	C5	C6	C7	H8	H9	H10	H11	H12	H13	C14	H15	H16	C17	H18	H19	Total
S1	0	0	0	0	0	0	0	0	0	0	0	0	0	0	0	0	0	0	0	0
S2	0	0	0	0	0	0	0	0	0	0	0	0	0	0	0	0	0	0	0
O3	0	0	0	0	0	0	0	0	0	0	0	0	0	0	0	0	0	0	0
C4	0	0	0	0	0	0	0	0	0	0	0	0	0	0	0	0	0	0	0
C5	0	0	0	0	0	0	0	0	0	0	0	0	0	0	0	0	0	0	0
C6	0	0	0	0	0	0	0	0	0	0	0	0	0	0	0	0	0	0	0
C7	0	0	0	0	0	0	0	0	0	0	0	0	0	0	0	0	0	0	0
H8	0	0	0	0	0	0	0	0	0	0	0	0	0	0	0	0	0	0	0
H9	0	0	0	0	0	0	0	0	0	0	0	0	0	0	0	0	0	0	0
H10	0	0	0	0	0	0	0	0	0	0	0	0	0	0	0	0	0	0	0
H11	0	0	0	0	0	0	0	0	0	0	0	0	0	0	0	0	0	0	0
H12	0	0	0	0	0	0	0	0	0	0	0	0	0	0	0	0	0	0	0
H13	0	0	0	0	0	0	0	0	0	0	0	0	0	0	0	0	0	0	0
C14	0	0	0	0	0	0	0	0	0	0	0	0	0	0	0	0	0	0	0
H15	0	0	0	0	0	0	0	0	0	0	0	0	0	0	0	0	0	0	0
H16	0	0	0	0	0	0	0	0	0	0	0	0	0	0	0	0	0	0	0
C17	0	0	0	0	0	0	0	0	0	0	0	0	0	0	0	0	0	0	0
H18	0	0	0	0	0	0	0	0	0	0	0	0	0	0	0	0	0	0	0
H19	0	0	0	0	0	0	0	0	0	0	0	0	0	0	0	0	0	0	0
Weighted LDM — alliciin_conf_28_LIDI_matrix (× 0)
	S1	S2	O3	C4	C5	C6	C7	H8	H9	H10	H11	H12	H13	C14	H15	H16	C17	H18	H19	Total
S1	0	0	0	0	0	0	0	0	0	0	0	0	0	0	0	0	0	0	0	0
S2	0	0	0	0	0	0	0	0	0	0	0	0	0	0	0	0	0	0	0
O3	0	0	0	0	0	0	0	0	0	0	0	0	0	0	0	0	0	0	0
C4	0	0	0	0	0	0	0	0	0	0	0	0	0	0	0	0	0	0	0
C5	0	0	0	0	0	0	0	0	0	0	0	0	0	0	0	0	0	0	0
C6	0	0	0	0	0	0	0	0	0	0	0	0	0	0	0	0	0	0	0
C7	0	0	0	0	0	0	0	0	0	0	0	0	0	0	0	0	0	0	0
H8	0	0	0	0	0	0	0	0	0	0	0	0	0	0	0	0	0	0	0
H9	0	0	0	0	0	0	0	0	0	0	0	0	0	0	0	0	0	0	0
H10	0	0	0	0	0	0	0	0	0	0	0	0	0	0	0	0	0	0	0
H11	0	0	0	0	0	0	0	0	0	0	0	0	0	0	0	0	0	0	0
H12	0	0	0	0	0	0	0	0	0	0	0	0	0	0	0	0	0	0	0
H13	0	0	0	0	0	0	0	0	0	0	0	0	0	0	0	0	0	0	0
C14	0	0	0	0	0	0	0	0	0	0	0	0	0	0	0	0	0	0	0
H15	0	0	0	0	0	0	0	0	0	0	0	0	0	0	0	0	0	0	0
H16	0	0	0	0	0	0	0	0	0	0	0	0	0	0	0	0	0	0	0
C17	0	0	0	0	0	0	0	0	0	0	0	0	0	0	0	0	0	0	0
H18	0	0	0	0	0	0	0	0	0	0	0	0	0	0	0	0	0	0	0
H19	0	0	0	0	0	0	0	0	0	0	0	0	0	0	0	0	0	0	0
Weighted LDM — alliciin_conf_29_LIDI_matrix (× 0)
	S1	S2	O3	C4	C5	C6	C7	H8	H9	H10	H11	H12	H13	C14	H15	H16	C17	H18	H19	Total
S1	0	0	0	0	0	0	0	0	0	0	0	0	0	0	0	0	0	0	0	0
S2	0	0	0	0	0	0	0	0	0	0	0	0	0	0	0	0	0	0	0
O3	0	0	0	0	0	0	0	0	0	0	0	0	0	0	0	0	0	0	0
C4	0	0	0	0	0	0	0	0	0	0	0	0	0	0	0	0	0	0	0
C5	0	0	0	0	0	0	0	0	0	0	0	0	0	0	0	0	0	0	0
C6	0	0	0	0	0	0	0	0	0	0	0	0	0	0	0	0	0	0	0
C7	0	0	0	0	0	0	0	0	0	0	0	0	0	0	0	0	0	0	0
H8	0	0	0	0	0	0	0	0	0	0	0	0	0	0	0	0	0	0	0
H9	0	0	0	0	0	0	0	0	0	0	0	0	0	0	0	0	0	0	0
H10	0	0	0	0	0	0	0	0	0	0	0	0	0	0	0	0	0	0	0
H11	0	0	0	0	0	0	0	0	0	0	0	0	0	0	0	0	0	0	0
H12	0	0	0	0	0	0	0	0	0	0	0	0	0	0	0	0	0	0	0
H13	0	0	0	0	0	0	0	0	0	0	0	0	0	0	0	0	0	0	0
C14	0	0	0	0	0	0	0	0	0	0	0	0	0	0	0	0	0	0	0
H15	0	0	0	0	0	0	0	0	0	0	0	0	0	0	0	0	0	0	0
H16	0	0	0	0	0	0	0	0	0	0	0	0	0	0	0	0	0	0	0
C17	0	0	0	0	0	0	0	0	0	0	0	0	0	0	0	0	0	0	0
H18	0	0	0	0	0	0	0	0	0	0	0	0	0	0	0	0	0	0	0
H19	0	0	0	0	0	0	0	0	0	0	0	0	0	0	0	0	0	0	0
Weighted LDM — alliciin_conf_30_LIDI_matrix (× 0)
	S1	S2	O3	C4	C5	C6	C7	H8	H9	H10	H11	H12	H13	C14	H15	H16	C17	H18	H19	Total
S1	0	0	0	0	0	0	0	0	0	0	0	0	0	0	0	0	0	0	0	0
S2	0	0	0	0	0	0	0	0	0	0	0	0	0	0	0	0	0	0	0
O3	0	0	0	0	0	0	0	0	0	0	0	0	0	0	0	0	0	0	0
C4	0	0	0	0	0	0	0	0	0	0	0	0	0	0	0	0	0	0	0
C5	0	0	0	0	0	0	0	0	0	0	0	0	0	0	0	0	0	0	0
C6	0	0	0	0	0	0	0	0	0	0	0	0	0	0	0	0	0	0	0
C7	0	0	0	0	0	0	0	0	0	0	0	0	0	0	0	0	0	0	0
H8	0	0	0	0	0	0	0	0	0	0	0	0	0	0	0	0	0	0	0
H9	0	0	0	0	0	0	0	0	0	0	0	0	0	0	0	0	0	0	0
H10	0	0	0	0	0	0	0	0	0	0	0	0	0	0	0	0	0	0	0
H11	0	0	0	0	0	0	0	0	0	0	0	0	0	0	0	0	0	0	0
H12	0	0	0	0	0	0	0	0	0	0	0	0	0	0	0	0	0	0	0
H13	0	0	0	0	0	0	0	0	0	0	0	0	0	0	0	0	0	0	0
C14	0	0	0	0	0	0	0	0	0	0	0	0	0	0	0	0	0	0	0
H15	0	0	0	0	0	0	0	0	0	0	0	0	0	0	0	0	0	0	0
H16	0	0	0	0	0	0	0	0	0	0	0	0	0	0	0	0	0	0	0
C17	0	0	0	0	0	0	0	0	0	0	0	0	0	0	0	0	0	0	0
H18	0	0	0	0	0	0	0	0	0	0	0	0	0	0	0	0	0	0	0
H19	0	0	0	0	0	0	0	0	0	0	0	0	0	0	0	0	0	0	0
Weighted LDM — alliciin_conf_31_LIDI_matrix (× 0)
	S1	S2	O3	C4	C5	C6	C7	H8	H9	H10	H11	H12	H13	C14	H15	H16	C17	H18	H19	Total
S1	0	0	0	0	0	0	0	0	0	0	0	0	0	0	0	0	0	0	0	0
S2	0	0	0	0	0	0	0	0	0	0	0	0	0	0	0	0	0	0	0
O3	0	0	0	0	0	0	0	0	0	0	0	0	0	0	0	0	0	0	0
C4	0	0	0	0	0	0	0	0	0	0	0	0	0	0	0	0	0	0	0
C5	0	0	0	0	0	0	0	0	0	0	0	0	0	0	0	0	0	0	0
C6	0	0	0	0	0	0	0	0	0	0	0	0	0	0	0	0	0	0	0
C7	0	0	0	0	0	0	0	0	0	0	0	0	0	0	0	0	0	0	0
H8	0	0	0	0	0	0	0	0	0	0	0	0	0	0	0	0	0	0	0
H9	0	0	0	0	0	0	0	0	0	0	0	0	0	0	0	0	0	0	0
H10	0	0	0	0	0	0	0	0	0	0	0	0	0	0	0	0	0	0	0
H11	0	0	0	0	0	0	0	0	0	0	0	0	0	0	0	0	0	0	0
H12	0	0	0	0	0	0	0	0	0	0	0	0	0	0	0	0	0	0	0
H13	0	0	0	0	0	0	0	0	0	0	0	0	0	0	0	0	0	0	0
C14	0	0	0	0	0	0	0	0	0	0	0	0	0	0	0	0	0	0	0
H15	0	0	0	0	0	0	0	0	0	0	0	0	0	0	0	0	0	0	0
H16	0	0	0	0	0	0	0	0	0	0	0	0	0	0	0	0	0	0	0
C17	0	0	0	0	0	0	0	0	0	0	0	0	0	0	0	0	0	0	0
H18	0	0	0	0	0	0	0	0	0	0	0	0	0	0	0	0	0	0	0
H19	0	0	0	0	0	0	0	0	0	0	0	0	0	0	0	0	0	0	0
Weighted LDM — alliciin_conf_32_LIDI_matrix (× 0)
	S1	S2	O3	C4	C5	C6	C7	H8	H9	H10	H11	H12	H13	C14	H15	H16	C17	H18	H19	Total
S1	0	0	0	0	0	0	0	0	0	0	0	0	0	0	0	0	0	0	0	0
S2	0	0	0	0	0	0	0	0	0	0	0	0	0	0	0	0	0	0	0
O3	0	0	0	0	0	0	0	0	0	0	0	0	0	0	0	0	0	0	0
C4	0	0	0	0	0	0	0	0	0	0	0	0	0	0	0	0	0	0	0
C5	0	0	0	0	0	0	0	0	0	0	0	0	0	0	0	0	0	0	0
C6	0	0	0	0	0	0	0	0	0	0	0	0	0	0	0	0	0	0	0
C7	0	0	0	0	0	0	0	0	0	0	0	0	0	0	0	0	0	0	0
H8	0	0	0	0	0	0	0	0	0	0	0	0	0	0	0	0	0	0	0
H9	0	0	0	0	0	0	0	0	0	0	0	0	0	0	0	0	0	0	0
H10	0	0	0	0	0	0	0	0	0	0	0	0	0	0	0	0	0	0	0
H11	0	0	0	0	0	0	0	0	0	0	0	0	0	0	0	0	0	0	0
H12	0	0	0	0	0	0	0	0	0	0	0	0	0	0	0	0	0	0	0
H13	0	0	0	0	0	0	0	0	0	0	0	0	0	0	0	0	0	0	0
C14	0	0	0	0	0	0	0	0	0	0	0	0	0	0	0	0	0	0	0
H15	0	0	0	0	0	0	0	0	0	0	0	0	0	0	0	0	0	0	0
H16	0	0	0	0	0	0	0	0	0	0	0	0	0	0	0	0	0	0	0
C17	0	0	0	0	0	0	0	0	0	0	0	0	0	0	0	0	0	0	0
H18	0	0	0	0	0	0	0	0	0	0	0	0	0	0	0	0	0	0	0
H19	0	0	0	0	0	0	0	0	0	0	0	0	0	0	0	0	0	0	0
Weighted LDM — alliciin_conf_33_LIDI_matrix (× 0)
	S1	S2	O3	C4	C5	C6	C7	H8	H9	H10	H11	H12	H13	C14	H15	H16	C17	H18	H19	Total
S1	0	0	0	0	0	0	0	0	0	0	0	0	0	0	0	0	0	0	0	0
S2	0	0	0	0	0	0	0	0	0	0	0	0	0	0	0	0	0	0	0
O3	0	0	0	0	0	0	0	0	0	0	0	0	0	0	0	0	0	0	0
C4	0	0	0	0	0	0	0	0	0	0	0	0	0	0	0	0	0	0	0
C5	0	0	0	0	0	0	0	0	0	0	0	0	0	0	0	0	0	0	0
C6	0	0	0	0	0	0	0	0	0	0	0	0	0	0	0	0	0	0	0
C7	0	0	0	0	0	0	0	0	0	0	0	0	0	0	0	0	0	0	0
H8	0	0	0	0	0	0	0	0	0	0	0	0	0	0	0	0	0	0	0
H9	0	0	0	0	0	0	0	0	0	0	0	0	0	0	0	0	0	0	0
H10	0	0	0	0	0	0	0	0	0	0	0	0	0	0	0	0	0	0	0
H11	0	0	0	0	0	0	0	0	0	0	0	0	0	0	0	0	0	0	0
H12	0	0	0	0	0	0	0	0	0	0	0	0	0	0	0	0	0	0	0
H13	0	0	0	0	0	0	0	0	0	0	0	0	0	0	0	0	0	0	0
C14	0	0	0	0	0	0	0	0	0	0	0	0	0	0	0	0	0	0	0
H15	0	0	0	0	0	0	0	0	0	0	0	0	0	0	0	0	0	0	0
H16	0	0	0	0	0	0	0	0	0	0	0	0	0	0	0	0	0	0	0
C17	0	0	0	0	0	0	0	0	0	0	0	0	0	0	0	0	0	0	0
H18	0	0	0	0	0	0	0	0	0	0	0	0	0	0	0	0	0	0	0
H19	0	0	0	0	0	0	0	0	0	0	0	0	0	0	0	0	0	0	0
Weighted LDM — alliciin_conf_34_LIDI_matrix (× 0)
	S1	S2	O3	C4	C5	C6	C7	H8	H9	H10	H11	H12	H13	C14	H15	H16	C17	H18	H19	Total
S1	0	0	0	0	0	0	0	0	0	0	0	0	0	0	0	0	0	0	0	0
S2	0	0	0	0	0	0	0	0	0	0	0	0	0	0	0	0	0	0	0
O3	0	0	0	0	0	0	0	0	0	0	0	0	0	0	0	0	0	0	0
C4	0	0	0	0	0	0	0	0	0	0	0	0	0	0	0	0	0	0	0
C5	0	0	0	0	0	0	0	0	0	0	0	0	0	0	0	0	0	0	0
C6	0	0	0	0	0	0	0	0	0	0	0	0	0	0	0	0	0	0	0
C7	0	0	0	0	0	0	0	0	0	0	0	0	0	0	0	0	0	0	0
H8	0	0	0	0	0	0	0	0	0	0	0	0	0	0	0	0	0	0	0
H9	0	0	0	0	0	0	0	0	0	0	0	0	0	0	0	0	0	0	0
H10	0	0	0	0	0	0	0	0	0	0	0	0	0	0	0	0	0	0	0
H11	0	0	0	0	0	0	0	0	0	0	0	0	0	0	0	0	0	0	0
H12	0	0	0	0	0	0	0	0	0	0	0	0	0	0	0	0	0	0	0
H13	0	0	0	0	0	0	0	0	0	0	0	0	0	0	0	0	0	0	0
C14	0	0	0	0	0	0	0	0	0	0	0	0	0	0	0	0	0	0	0
H15	0	0	0	0	0	0	0	0	0	0	0	0	0	0	0	0	0	0	0
H16	0	0	0	0	0	0	0	0	0	0	0	0	0	0	0	0	0	0	0
C17	0	0	0	0	0	0	0	0	0	0	0	0	0	0	0	0	0	0	0
H18	0	0	0	0	0	0	0	0	0	0	0	0	0	0	0	0	0	0	0
H19	0	0	0	0	0	0	0	0	0	0	0	0	0	0	0	0	0	0	0
Weighted LDM — alliciin_conf_35_LIDI_matrix (× 0)
	S1	S2	O3	C4	C5	C6	C7	H8	H9	H10	H11	H12	H13	C14	H15	H16	C17	H18	H19	Total
S1	0	0	0	0	0	0	0	0	0	0	0	0	0	0	0	0	0	0	0	0
S2	0	0	0	0	0	0	0	0	0	0	0	0	0	0	0	0	0	0	0
O3	0	0	0	0	0	0	0	0	0	0	0	0	0	0	0	0	0	0	0
C4	0	0	0	0	0	0	0	0	0	0	0	0	0	0	0	0	0	0	0
C5	0	0	0	0	0	0	0	0	0	0	0	0	0	0	0	0	0	0	0
C6	0	0	0	0	0	0	0	0	0	0	0	0	0	0	0	0	0	0	0
C7	0	0	0	0	0	0	0	0	0	0	0	0	0	0	0	0	0	0	0
H8	0	0	0	0	0	0	0	0	0	0	0	0	0	0	0	0	0	0	0
H9	0	0	0	0	0	0	0	0	0	0	0	0	0	0	0	0	0	0	0
H10	0	0	0	0	0	0	0	0	0	0	0	0	0	0	0	0	0	0	0
H11	0	0	0	0	0	0	0	0	0	0	0	0	0	0	0	0	0	0	0
H12	0	0	0	0	0	0	0	0	0	0	0	0	0	0	0	0	0	0	0
H13	0	0	0	0	0	0	0	0	0	0	0	0	0	0	0	0	0	0	0
C14	0	0	0	0	0	0	0	0	0	0	0	0	0	0	0	0	0	0	0
H15	0	0	0	0	0	0	0	0	0	0	0	0	0	0	0	0	0	0	0
H16	0	0	0	0	0	0	0	0	0	0	0	0	0	0	0	0	0	0	0
C17	0	0	0	0	0	0	0	0	0	0	0	0	0	0	0	0	0	0	0
H18	0	0	0	0	0	0	0	0	0	0	0	0	0	0	0	0	0	0	0
H19	0	0	0	0	0	0	0	0	0	0	0	0	0	0	0	0	0	0	0
Weighted LDM — alliciin_conf_36_LIDI_matrix (× 0)
	S1	S2	O3	C4	C5	C6	C7	H8	H9	H10	H11	H12	H13	C14	H15	H16	C17	H18	H19	Total
S1	0	0	0	0	0	0	0	0	0	0	0	0	0	0	0	0	0	0	0	0
S2	0	0	0	0	0	0	0	0	0	0	0	0	0	0	0	0	0	0	0
O3	0	0	0	0	0	0	0	0	0	0	0	0	0	0	0	0	0	0	0
C4	0	0	0	0	0	0	0	0	0	0	0	0	0	0	0	0	0	0	0
C5	0	0	0	0	0	0	0	0	0	0	0	0	0	0	0	0	0	0	0
C6	0	0	0	0	0	0	0	0	0	0	0	0	0	0	0	0	0	0	0
C7	0	0	0	0	0	0	0	0	0	0	0	0	0	0	0	0	0	0	0
H8	0	0	0	0	0	0	0	0	0	0	0	0	0	0	0	0	0	0	0
H9	0	0	0	0	0	0	0	0	0	0	0	0	0	0	0	0	0	0	0
H10	0	0	0	0	0	0	0	0	0	0	0	0	0	0	0	0	0	0	0
H11	0	0	0	0	0	0	0	0	0	0	0	0	0	0	0	0	0	0	0
H12	0	0	0	0	0	0	0	0	0	0	0	0	0	0	0	0	0	0	0
H13	0	0	0	0	0	0	0	0	0	0	0	0	0	0	0	0	0	0	0
C14	0	0	0	0	0	0	0	0	0	0	0	0	0	0	0	0	0	0	0
H15	0	0	0	0	0	0	0	0	0	0	0	0	0	0	0	0	0	0	0
H16	0	0	0	0	0	0	0	0	0	0	0	0	0	0	0	0	0	0	0
C17	0	0	0	0	0	0	0	0	0	0	0	0	0	0	0	0	0	0	0
H18	0	0	0	0	0	0	0	0	0	0	0	0	0	0	0	0	0	0	0
H19	0	0	0	0	0	0	0	0	0	0	0	0	0	0	0	0	0	0	0
Weighted LDM — alliciin_conf_37_LIDI_matrix (× 0)
	S1	S2	O3	C4	C5	C6	C7	H8	H9	H10	H11	H12	H13	C14	H15	H16	C17	H18	H19	Total
S1	0	0	0	0	0	0	0	0	0	0	0	0	0	0	0	0	0	0	0	0
S2	0	0	0	0	0	0	0	0	0	0	0	0	0	0	0	0	0	0	0
O3	0	0	0	0	0	0	0	0	0	0	0	0	0	0	0	0	0	0	0
C4	0	0	0	0	0	0	0	0	0	0	0	0	0	0	0	0	0	0	0
C5	0	0	0	0	0	0	0	0	0	0	0	0	0	0	0	0	0	0	0
C6	0	0	0	0	0	0	0	0	0	0	0	0	0	0	0	0	0	0	0
C7	0	0	0	0	0	0	0	0	0	0	0	0	0	0	0	0	0	0	0
H8	0	0	0	0	0	0	0	0	0	0	0	0	0	0	0	0	0	0	0
H9	0	0	0	0	0	0	0	0	0	0	0	0	0	0	0	0	0	0	0
H10	0	0	0	0	0	0	0	0	0	0	0	0	0	0	0	0	0	0	0
H11	0	0	0	0	0	0	0	0	0	0	0	0	0	0	0	0	0	0	0
H12	0	0	0	0	0	0	0	0	0	0	0	0	0	0	0	0	0	0	0
H13	0	0	0	0	0	0	0	0	0	0	0	0	0	0	0	0	0	0	0
C14	0	0	0	0	0	0	0	0	0	0	0	0	0	0	0	0	0	0	0
H15	0	0	0	0	0	0	0	0	0	0	0	0	0	0	0	0	0	0	0
H16	0	0	0	0	0	0	0	0	0	0	0	0	0	0	0	0	0	0	0
C17	0	0	0	0	0	0	0	0	0	0	0	0	0	0	0	0	0	0	0
H18	0	0	0	0	0	0	0	0	0	0	0	0	0	0	0	0	0	0	0
H19	0	0	0	0	0	0	0	0	0	0	0	0	0	0	0	0	0	0	0
Weighted LDM — alliciin_conf_38_LIDI_matrix (× 0)
	S1	S2	O3	C4	C5	C6	C7	H8	H9	H10	H11	H12	H13	C14	H15	H16	C17	H18	H19	Total
S1	0	0	0	0	0	0	0	0	0	0	0	0	0	0	0	0	0	0	0	0
S2	0	0	0	0	0	0	0	0	0	0	0	0	0	0	0	0	0	0	0
O3	0	0	0	0	0	0	0	0	0	0	0	0	0	0	0	0	0	0	0
C4	0	0	0	0	0	0	0	0	0	0	0	0	0	0	0	0	0	0	0
C5	0	0	0	0	0	0	0	0	0	0	0	0	0	0	0	0	0	0	0
C6	0	0	0	0	0	0	0	0	0	0	0	0	0	0	0	0	0	0	0
C7	0	0	0	0	0	0	0	0	0	0	0	0	0	0	0	0	0	0	0
H8	0	0	0	0	0	0	0	0	0	0	0	0	0	0	0	0	0	0	0
H9	0	0	0	0	0	0	0	0	0	0	0	0	0	0	0	0	0	0	0
H10	0	0	0	0	0	0	0	0	0	0	0	0	0	0	0	0	0	0	0
H11	0	0	0	0	0	0	0	0	0	0	0	0	0	0	0	0	0	0	0
H12	0	0	0	0	0	0	0	0	0	0	0	0	0	0	0	0	0	0	0
H13	0	0	0	0	0	0	0	0	0	0	0	0	0	0	0	0	0	0	0
C14	0	0	0	0	0	0	0	0	0	0	0	0	0	0	0	0	0	0	0
H15	0	0	0	0	0	0	0	0	0	0	0	0	0	0	0	0	0	0	0
H16	0	0	0	0	0	0	0	0	0	0	0	0	0	0	0	0	0	0	0
C17	0	0	0	0	0	0	0	0	0	0	0	0	0	0	0	0	0	0	0
H18	0	0	0	0	0	0	0	0	0	0	0	0	0	0	0	0	0	0	0
H19	0	0	0	0	0	0	0	0	0	0	0	0	0	0	0	0	0	0	0
Weighted LDM — alliciin_conf_39_LIDI_matrix (× 0)
	S1	S2	O3	C4	C5	C6	C7	H8	H9	H10	H11	H12	H13	C14	H15	H16	C17	H18	H19	Total
S1	0	0	0	0	0	0	0	0	0	0	0	0	0	0	0	0	0	0	0	0
S2	0	0	0	0	0	0	0	0	0	0	0	0	0	0	0	0	0	0	0
O3	0	0	0	0	0	0	0	0	0	0	0	0	0	0	0	0	0	0	0
C4	0	0	0	0	0	0	0	0	0	0	0	0	0	0	0	0	0	0	0
C5	0	0	0	0	0	0	0	0	0	0	0	0	0	0	0	0	0	0	0
C6	0	0	0	0	0	0	0	0	0	0	0	0	0	0	0	0	0	0	0
C7	0	0	0	0	0	0	0	0	0	0	0	0	0	0	0	0	0	0	0
H8	0	0	0	0	0	0	0	0	0	0	0	0	0	0	0	0	0	0	0
H9	0	0	0	0	0	0	0	0	0	0	0	0	0	0	0	0	0	0	0
H10	0	0	0	0	0	0	0	0	0	0	0	0	0	0	0	0	0	0	0
H11	0	0	0	0	0	0	0	0	0	0	0	0	0	0	0	0	0	0	0
H12	0	0	0	0	0	0	0	0	0	0	0	0	0	0	0	0	0	0	0
H13	0	0	0	0	0	0	0	0	0	0	0	0	0	0	0	0	0	0	0
C14	0	0	0	0	0	0	0	0	0	0	0	0	0	0	0	0	0	0	0
H15	0	0	0	0	0	0	0	0	0	0	0	0	0	0	0	0	0	0	0
H16	0	0	0	0	0	0	0	0	0	0	0	0	0	0	0	0	0	0	0
C17	0	0	0	0	0	0	0	0	0	0	0	0	0	0	0	0	0	0	0
H18	0	0	0	0	0	0	0	0	0	0	0	0	0	0	0	0	0	0	0
H19	0	0	0	0	0	0	0	0	0	0	0	0	0	0	0	0	0	0	0
Weighted LDM — alliciin_conf_40_LIDI_matrix (× 0)
	S1	S2	O3	C4	C5	C6	C7	H8	H9	H10	H11	H12	H13	C14	H15	H16	C17	H18	H19	Total
S1	0	0	0	0	0	0	0	0	0	0	0	0	0	0	0	0	0	0	0	0
S2	0	0	0	0	0	0	0	0	0	0	0	0	0	0	0	0	0	0	0
O3	0	0	0	0	0	0	0	0	0	0	0	0	0	0	0	0	0	0	0
C4	0	0	0	0	0	0	0	0	0	0	0	0	0	0	0	0	0	0	0
C5	0	0	0	0	0	0	0	0	0	0	0	0	0	0	0	0	0	0	0
C6	0	0	0	0	0	0	0	0	0	0	0	0	0	0	0	0	0	0	0
C7	0	0	0	0	0	0	0	0	0	0	0	0	0	0	0	0	0	0	0
H8	0	0	0	0	0	0	0	0	0	0	0	0	0	0	0	0	0	0	0
H9	0	0	0	0	0	0	0	0	0	0	0	0	0	0	0	0	0	0	0
H10	0	0	0	0	0	0	0	0	0	0	0	0	0	0	0	0	0	0	0
H11	0	0	0	0	0	0	0	0	0	0	0	0	0	0	0	0	0	0	0
H12	0	0	0	0	0	0	0	0	0	0	0	0	0	0	0	0	0	0	0
H13	0	0	0	0	0	0	0	0	0	0	0	0	0	0	0	0	0	0	0
C14	0	0	0	0	0	0	0	0	0	0	0	0	0	0	0	0	0	0	0
H15	0	0	0	0	0	0	0	0	0	0	0	0	0	0	0	0	0	0	0
H16	0	0	0	0	0	0	0	0	0	0	0	0	0	0	0	0	0	0	0
C17	0	0	0	0	0	0	0	0	0	0	0	0	0	0	0	0	0	0	0
H18	0	0	0	0	0	0	0	0	0	0	0	0	0	0	0	0	0	0	0
H19	0	0	0	0	0	0	0	0	0	0	0	0	0	0	0	0	0	0	0
Weighted LDM — alliciin_conf_41_LIDI_matrix (× 0)
	S1	S2	O3	C4	C5	C6	C7	H8	H9	H10	H11	H12	H13	C14	H15	H16	C17	H18	H19	Total
S1	0	0	0	0	0	0	0	0	0	0	0	0	0	0	0	0	0	0	0	0
S2	0	0	0	0	0	0	0	0	0	0	0	0	0	0	0	0	0	0	0
O3	0	0	0	0	0	0	0	0	0	0	0	0	0	0	0	0	0	0	0
C4	0	0	0	0	0	0	0	0	0	0	0	0	0	0	0	0	0	0	0
C5	0	0	0	0	0	0	0	0	0	0	0	0	0	0	0	0	0	0	0
C6	0	0	0	0	0	0	0	0	0	0	0	0	0	0	0	0	0	0	0
C7	0	0	0	0	0	0	0	0	0	0	0	0	0	0	0	0	0	0	0
H8	0	0	0	0	0	0	0	0	0	0	0	0	0	0	0	0	0	0	0
H9	0	0	0	0	0	0	0	0	0	0	0	0	0	0	0	0	0	0	0
H10	0	0	0	0	0	0	0	0	0	0	0	0	0	0	0	0	0	0	0
H11	0	0	0	0	0	0	0	0	0	0	0	0	0	0	0	0	0	0	0
H12	0	0	0	0	0	0	0	0	0	0	0	0	0	0	0	0	0	0	0
H13	0	0	0	0	0	0	0	0	0	0	0	0	0	0	0	0	0	0	0
C14	0	0	0	0	0	0	0	0	0	0	0	0	0	0	0	0	0	0	0
H15	0	0	0	0	0	0	0	0	0	0	0	0	0	0	0	0	0	0	0
H16	0	0	0	0	0	0	0	0	0	0	0	0	0	0	0	0	0	0	0
C17	0	0	0	0	0	0	0	0	0	0	0	0	0	0	0	0	0	0	0
H18	0	0	0	0	0	0	0	0	0	0	0	0	0	0	0	0	0	0	0
H19	0	0	0	0	0	0	0	0	0	0	0	0	0	0	0	0	0	0	0
Weighted LDM — alliciin_conf_42_LIDI_matrix (× 0)
	S1	S2	O3	C4	C5	C6	C7	H8	H9	H10	H11	H12	H13	C14	H15	H16	C17	H18	H19	Total
S1	0	0	0	0	0	0	0	0	0	0	0	0	0	0	0	0	0	0	0	0
S2	0	0	0	0	0	0	0	0	0	0	0	0	0	0	0	0	0	0	0
O3	0	0	0	0	0	0	0	0	0	0	0	0	0	0	0	0	0	0	0
C4	0	0	0	0	0	0	0	0	0	0	0	0	0	0	0	0	0	0	0
C5	0	0	0	0	0	0	0	0	0	0	0	0	0	0	0	0	0	0	0
C6	0	0	0	0	0	0	0	0	0	0	0	0	0	0	0	0	0	0	0
C7	0	0	0	0	0	0	0	0	0	0	0	0	0	0	0	0	0	0	0
H8	0	0	0	0	0	0	0	0	0	0	0	0	0	0	0	0	0	0	0
H9	0	0	0	0	0	0	0	0	0	0	0	0	0	0	0	0	0	0	0
H10	0	0	0	0	0	0	0	0	0	0	0	0	0	0	0	0	0	0	0
H11	0	0	0	0	0	0	0	0	0	0	0	0	0	0	0	0	0	0	0
H12	0	0	0	0	0	0	0	0	0	0	0	0	0	0	0	0	0	0	0
H13	0	0	0	0	0	0	0	0	0	0	0	0	0	0	0	0	0	0	0
C14	0	0	0	0	0	0	0	0	0	0	0	0	0	0	0	0	0	0	0
H15	0	0	0	0	0	0	0	0	0	0	0	0	0	0	0	0	0	0	0
H16	0	0	0	0	0	0	0	0	0	0	0	0	0	0	0	0	0	0	0
C17	0	0	0	0	0	0	0	0	0	0	0	0	0	0	0	0	0	0	0
H18	0	0	0	0	0	0	0	0	0	0	0	0	0	0	0	0	0	0	0
H19	0	0	0	0	0	0	0	0	0	0	0	0	0	0	0	0	0	0	0
Weighted LDM — alliciin_conf_43_LIDI_matrix (× 0)
	S1	S2	O3	C4	C5	C6	C7	H8	H9	H10	H11	H12	H13	C14	H15	H16	C17	H18	H19	Total
S1	0	0	0	0	0	0	0	0	0	0	0	0	0	0	0	0	0	0	0	0
S2	0	0	0	0	0	0	0	0	0	0	0	0	0	0	0	0	0	0	0
O3	0	0	0	0	0	0	0	0	0	0	0	0	0	0	0	0	0	0	0
C4	0	0	0	0	0	0	0	0	0	0	0	0	0	0	0	0	0	0	0
C5	0	0	0	0	0	0	0	0	0	0	0	0	0	0	0	0	0	0	0
C6	0	0	0	0	0	0	0	0	0	0	0	0	0	0	0	0	0	0	0
C7	0	0	0	0	0	0	0	0	0	0	0	0	0	0	0	0	0	0	0
H8	0	0	0	0	0	0	0	0	0	0	0	0	0	0	0	0	0	0	0
H9	0	0	0	0	0	0	0	0	0	0	0	0	0	0	0	0	0	0	0
H10	0	0	0	0	0	0	0	0	0	0	0	0	0	0	0	0	0	0	0
H11	0	0	0	0	0	0	0	0	0	0	0	0	0	0	0	0	0	0	0
H12	0	0	0	0	0	0	0	0	0	0	0	0	0	0	0	0	0	0	0
H13	0	0	0	0	0	0	0	0	0	0	0	0	0	0	0	0	0	0	0
C14	0	0	0	0	0	0	0	0	0	0	0	0	0	0	0	0	0	0	0
H15	0	0	0	0	0	0	0	0	0	0	0	0	0	0	0	0	0	0	0
H16	0	0	0	0	0	0	0	0	0	0	0	0	0	0	0	0	0	0	0
C17	0	0	0	0	0	0	0	0	0	0	0	0	0	0	0	0	0	0	0
H18	0	0	0	0	0	0	0	0	0	0	0	0	0	0	0	0	0	0	0
H19	0	0	0	0	0	0	0	0	0	0	0	0	0	0	0	0	0	0	0
Weighted LDM — alliciin_conf_44_LIDI_matrix (× 0)
	S1	S2	O3	C4	C5	C6	C7	H8	H9	H10	H11	H12	H13	C14	H15	H16	C17	H18	H19	Total
S1	0	0	0	0	0	0	0	0	0	0	0	0	0	0	0	0	0	0	0	0
S2	0	0	0	0	0	0	0	0	0	0	0	0	0	0	0	0	0	0	0
O3	0	0	0	0	0	0	0	0	0	0	0	0	0	0	0	0	0	0	0
C4	0	0	0	0	0	0	0	0	0	0	0	0	0	0	0	0	0	0	0
C5	0	0	0	0	0	0	0	0	0	0	0	0	0	0	0	0	0	0	0
C6	0	0	0	0	0	0	0	0	0	0	0	0	0	0	0	0	0	0	0
C7	0	0	0	0	0	0	0	0	0	0	0	0	0	0	0	0	0	0	0
H8	0	0	0	0	0	0	0	0	0	0	0	0	0	0	0	0	0	0	0
H9	0	0	0	0	0	0	0	0	0	0	0	0	0	0	0	0	0	0	0
H10	0	0	0	0	0	0	0	0	0	0	0	0	0	0	0	0	0	0	0
H11	0	0	0	0	0	0	0	0	0	0	0	0	0	0	0	0	0	0	0
H12	0	0	0	0	0	0	0	0	0	0	0	0	0	0	0	0	0	0	0
H13	0	0	0	0	0	0	0	0	0	0	0	0	0	0	0	0	0	0	0
C14	0	0	0	0	0	0	0	0	0	0	0	0	0	0	0	0	0	0	0
H15	0	0	0	0	0	0	0	0	0	0	0	0	0	0	0	0	0	0	0
H16	0	0	0	0	0	0	0	0	0	0	0	0	0	0	0	0	0	0	0
C17	0	0	0	0	0	0	0	0	0	0	0	0	0	0	0	0	0	0	0
H18	0	0	0	0	0	0	0	0	0	0	0	0	0	0	0	0	0	0	0
H19	0	0	0	0	0	0	0	0	0	0	0	0	0	0	0	0	0	0	0
Weighted LDM — alliciin_conf_45_LIDI_matrix (× 0)
	S1	S2	O3	C4	C5	C6	C7	H8	H9	H10	H11	H12	H13	C14	H15	H16	C17	H18	H19	Total
S1	0	0	0	0	0	0	0	0	0	0	0	0	0	0	0	0	0	0	0	0
S2	0	0	0	0	0	0	0	0	0	0	0	0	0	0	0	0	0	0	0
O3	0	0	0	0	0	0	0	0	0	0	0	0	0	0	0	0	0	0	0
C4	0	0	0	0	0	0	0	0	0	0	0	0	0	0	0	0	0	0	0
C5	0	0	0	0	0	0	0	0	0	0	0	0	0	0	0	0	0	0	0
C6	0	0	0	0	0	0	0	0	0	0	0	0	0	0	0	0	0	0	0
C7	0	0	0	0	0	0	0	0	0	0	0	0	0	0	0	0	0	0	0
H8	0	0	0	0	0	0	0	0	0	0	0	0	0	0	0	0	0	0	0
H9	0	0	0	0	0	0	0	0	0	0	0	0	0	0	0	0	0	0	0
H10	0	0	0	0	0	0	0	0	0	0	0	0	0	0	0	0	0	0	0
H11	0	0	0	0	0	0	0	0	0	0	0	0	0	0	0	0	0	0	0
H12	0	0	0	0	0	0	0	0	0	0	0	0	0	0	0	0	0	0	0
H13	0	0	0	0	0	0	0	0	0	0	0	0	0	0	0	0	0	0	0
C14	0	0	0	0	0	0	0	0	0	0	0	0	0	0	0	0	0	0	0
H15	0	0	0	0	0	0	0	0	0	0	0	0	0	0	0	0	0	0	0
H16	0	0	0	0	0	0	0	0	0	0	0	0	0	0	0	0	0	0	0
C17	0	0	0	0	0	0	0	0	0	0	0	0	0	0	0	0	0	0	0
H18	0	0	0	0	0	0	0	0	0	0	0	0	0	0	0	0	0	0	0
H19	0	0	0	0	0	0	0	0	0	0	0	0	0	0	0	0	0	0	0
Weighted LDM — alliciin_conf_46_LIDI_matrix (× 0)
	S1	S2	O3	C4	C5	C6	C7	H8	H9	H10	H11	H12	H13	C14	H15	H16	C17	H18	H19	Total
S1	0	0	0	0	0	0	0	0	0	0	0	0	0	0	0	0	0	0	0	0
S2	0	0	0	0	0	0	0	0	0	0	0	0	0	0	0	0	0	0	0
O3	0	0	0	0	0	0	0	0	0	0	0	0	0	0	0	0	0	0	0
C4	0	0	0	0	0	0	0	0	0	0	0	0	0	0	0	0	0	0	0
C5	0	0	0	0	0	0	0	0	0	0	0	0	0	0	0	0	0	0	0
C6	0	0	0	0	0	0	0	0	0	0	0	0	0	0	0	0	0	0	0
C7	0	0	0	0	0	0	0	0	0	0	0	0	0	0	0	0	0	0	0
H8	0	0	0	0	0	0	0	0	0	0	0	0	0	0	0	0	0	0	0
H9	0	0	0	0	0	0	0	0	0	0	0	0	0	0	0	0	0	0	0
H10	0	0	0	0	0	0	0	0	0	0	0	0	0	0	0	0	0	0	0
H11	0	0	0	0	0	0	0	0	0	0	0	0	0	0	0	0	0	0	0
H12	0	0	0	0	0	0	0	0	0	0	0	0	0	0	0	0	0	0	0
H13	0	0	0	0	0	0	0	0	0	0	0	0	0	0	0	0	0	0	0
C14	0	0	0	0	0	0	0	0	0	0	0	0	0	0	0	0	0	0	0
H15	0	0	0	0	0	0	0	0	0	0	0	0	0	0	0	0	0	0	0
H16	0	0	0	0	0	0	0	0	0	0	0	0	0	0	0	0	0	0	0
C17	0	0	0	0	0	0	0	0	0	0	0	0	0	0	0	0	0	0	0
H18	0	0	0	0	0	0	0	0	0	0	0	0	0	0	0	0	0	0	0
H19	0	0	0	0	0	0	0	0	0	0	0	0	0	0	0	0	0	0	0
Weighted LDM — alliciin_conf_47_LIDI_matrix (× 0)
	S1	S2	O3	C4	C5	C6	C7	H8	H9	H10	H11	H12	H13	C14	H15	H16	C17	H18	H19	Total
S1	0	0	0	0	0	0	0	0	0	0	0	0	0	0	0	0	0	0	0	0
S2	0	0	0	0	0	0	0	0	0	0	0	0	0	0	0	0	0	0	0
O3	0	0	0	0	0	0	0	0	0	0	0	0	0	0	0	0	0	0	0
C4	0	0	0	0	0	0	0	0	0	0	0	0	0	0	0	0	0	0	0
C5	0	0	0	0	0	0	0	0	0	0	0	0	0	0	0	0	0	0	0
C6	0	0	0	0	0	0	0	0	0	0	0	0	0	0	0	0	0	0	0
C7	0	0	0	0	0	0	0	0	0	0	0	0	0	0	0	0	0	0	0
H8	0	0	0	0	0	0	0	0	0	0	0	0	0	0	0	0	0	0	0
H9	0	0	0	0	0	0	0	0	0	0	0	0	0	0	0	0	0	0	0
H10	0	0	0	0	0	0	0	0	0	0	0	0	0	0	0	0	0	0	0
H11	0	0	0	0	0	0	0	0	0	0	0	0	0	0	0	0	0	0	0
H12	0	0	0	0	0	0	0	0	0	0	0	0	0	0	0	0	0	0	0
H13	0	0	0	0	0	0	0	0	0	0	0	0	0	0	0	0	0	0	0
C14	0	0	0	0	0	0	0	0	0	0	0	0	0	0	0	0	0	0	0
H15	0	0	0	0	0	0	0	0	0	0	0	0	0	0	0	0	0	0	0
H16	0	0	0	0	0	0	0	0	0	0	0	0	0	0	0	0	0	0	0
C17	0	0	0	0	0	0	0	0	0	0	0	0	0	0	0	0	0	0	0
H18	0	0	0	0	0	0	0	0	0	0	0	0	0	0	0	0	0	0	0
H19	0	0	0	0	0	0	0	0	0	0	0	0	0	0	0	0	0	0	0
Weighted LDM — alliciin_conf_48_LIDI_matrix (× 0)
	S1	S2	O3	C4	C5	C6	C7	H8	H9	H10	H11	H12	H13	C14	H15	H16	C17	H18	H19	Total
S1	0	0	0	0	0	0	0	0	0	0	0	0	0	0	0	0	0	0	0	0
S2	0	0	0	0	0	0	0	0	0	0	0	0	0	0	0	0	0	0	0
O3	0	0	0	0	0	0	0	0	0	0	0	0	0	0	0	0	0	0	0
C4	0	0	0	0	0	0	0	0	0	0	0	0	0	0	0	0	0	0	0
C5	0	0	0	0	0	0	0	0	0	0	0	0	0	0	0	0	0	0	0
C6	0	0	0	0	0	0	0	0	0	0	0	0	0	0	0	0	0	0	0
C7	0	0	0	0	0	0	0	0	0	0	0	0	0	0	0	0	0	0	0
H8	0	0	0	0	0	0	0	0	0	0	0	0	0	0	0	0	0	0	0
H9	0	0	0	0	0	0	0	0	0	0	0	0	0	0	0	0	0	0	0
H10	0	0	0	0	0	0	0	0	0	0	0	0	0	0	0	0	0	0	0
H11	0	0	0	0	0	0	0	0	0	0	0	0	0	0	0	0	0	0	0
H12	0	0	0	0	0	0	0	0	0	0	0	0	0	0	0	0	0	0	0
H13	0	0	0	0	0	0	0	0	0	0	0	0	0	0	0	0	0	0	0
C14	0	0	0	0	0	0	0	0	0	0	0	0	0	0	0	0	0	0	0
H15	0	0	0	0	0	0	0	0	0	0	0	0	0	0	0	0	0	0	0
H16	0	0	0	0	0	0	0	0	0	0	0	0	0	0	0	0	0	0	0
C17	0	0	0	0	0	0	0	0	0	0	0	0	0	0	0	0	0	0	0
H18	0	0	0	0	0	0	0	0	0	0	0	0	0	0	0	0	0	0	0
H19	0	0	0	0	0	0	0	0	0	0	0	0	0	0	0	0	0	0	0
Weighted LDM — alliciin_conf_49_LIDI_matrix (× 0)
	S1	S2	O3	C4	C5	C6	C7	H8	H9	H10	H11	H12	H13	C14	H15	H16	C17	H18	H19	Total
S1	0	0	0	0	0	0	0	0	0	0	0	0	0	0	0	0	0	0	0	0
S2	0	0	0	0	0	0	0	0	0	0	0	0	0	0	0	0	0	0	0
O3	0	0	0	0	0	0	0	0	0	0	0	0	0	0	0	0	0	0	0
C4	0	0	0	0	0	0	0	0	0	0	0	0	0	0	0	0	0	0	0
C5	0	0	0	0	0	0	0	0	0	0	0	0	0	0	0	0	0	0	0
C6	0	0	0	0	0	0	0	0	0	0	0	0	0	0	0	0	0	0	0
C7	0	0	0	0	0	0	0	0	0	0	0	0	0	0	0	0	0	0	0
H8	0	0	0	0	0	0	0	0	0	0	0	0	0	0	0	0	0	0	0
H9	0	0	0	0	0	0	0	0	0	0	0	0	0	0	0	0	0	0	0
H10	0	0	0	0	0	0	0	0	0	0	0	0	0	0	0	0	0	0	0
H11	0	0	0	0	0	0	0	0	0	0	0	0	0	0	0	0	0	0	0
H12	0	0	0	0	0	0	0	0	0	0	0	0	0	0	0	0	0	0	0
H13	0	0	0	0	0	0	0	0	0	0	0	0	0	0	0	0	0	0	0
C14	0	0	0	0	0	0	0	0	0	0	0	0	0	0	0	0	0	0	0
H15	0	0	0	0	0	0	0	0	0	0	0	0	0	0	0	0	0	0	0
H16	0	0	0	0	0	0	0	0	0	0	0	0	0	0	0	0	0	0	0
C17	0	0	0	0	0	0	0	0	0	0	0	0	0	0	0	0	0	0	0
H18	0	0	0	0	0	0	0	0	0	0	0	0	0	0	0	0	0	0	0
H19	0	0	0	0	0	0	0	0	0	0	0	0	0	0	0	0	0	0	0
																				86.0002
Weighted Ensemble LDM (Σ w·LDM)
	S1	S2	O3	C4	C5	C6	C7	H8	H9	H10	H11	H12	H13	C14	H15	H16	C17	H18	H19
S1	12.9524	0.511803	0.693998	0.0308896	0.00395689	0.0188011	0.00246362	0.00206645	0.000342287	0.000971452	0.00100775	0.00024717	0.00035091	0.46483	0.0235472	0.022088	0.0248434	0.0056725	0.0059665	14.7662
S2	0.511803	14.7638	0.0968174	0.0127107	0.0420517	0.00686661	0.0206813	0.00512054	0.00595433	0.000656226	0.00135224	0.00137885	0.00127728	0.0366579	0.00618788	0.00799007	0.538947	0.0278984	0.0272538	16.1154
O3	0.693998	0.0968174	8.27944	0.0104533	0.00206478	0.00497661	0.00313835	0.00338955	0.000642635	0.000444365	0.000375271	0.00133758	0.00223914	0.06151	0.00487863	0.00659818	0.0190983	0.0126112	0.0167774	9.22079
C4	0.0308896	0.0127107	0.0104533	3.97971	0.000522936	0.917867	0.000305934	0.47046	0.000353686	0.0301515	0.0298573	2.98452e-05	3.14592e-05	0.518992	0.0173976	0.0178397	0.001284	0.000350894	0.000778512	6.03999
C5	0.00395689	0.0420517	0.00206478	0.000522936	3.97319	0.000563107	0.916794	0.00022	0.473131	3.59414e-05	0.000246349	0.030212	0.0299221	0.00367589	0.00767878	0.000415209	0.51532	0.0181009	0.017704	6.03581
C6	0.0188011	0.00686661	0.00497661	0.917867	0.000563107	4.07648	0.00022092	0.0286846	0.000704914	0.481483	0.481828	2.26289e-05	1.80662e-05	0.0380577	0.00774693	0.00681727	0.000946986	0.000163494	0.000830055	6.07308
C7	0.00246362	0.0206813	0.00313835	0.000305934	0.916794	0.00022092	4.08522	0.000120834	0.0291731	1.47943e-05	0.000105721	0.482013	0.480088	0.00387621	0.00916358	0.000247003	0.0367084	0.00751066	0.0074103	6.08525
H8	0.00206645	0.00512054	0.00338955	0.47046	0.00022	0.0286846	0.000120834	0.398226	7.15541e-05	0.00578153	0.0044033	2.38831e-05	7.4094e-06	0.0192693	0.00220019	0.00405168	0.000259588	0.000147897	8.73346e-05	0.944592
H9	0.000342287	0.00595433	0.000642635	0.000353686	0.473131	0.000704914	0.0291731	7.15541e-05	0.411238	4.33555e-05	0.000176314	0.00472797	0.00555504	0.000248144	0.000315939	0.00017203	0.0197824	0.00303602	0.00301742	0.958686
H10	0.000971452	0.000656226	0.000444365	0.0301515	3.59414e-05	0.481483	1.47943e-05	0.00578153	4.33555e-05	0.410647	0.0166846	2.22788e-06	1.26381e-06	0.00631037	0.000561362	0.0028277	4.86571e-05	2.09583e-05	2.81961e-05	0.956715
H11	0.00100775	0.00135224	0.000375271	0.0298573	0.000246349	0.481828	0.000105721	0.0044033	0.000176314	0.0166846	0.406559	6.60856e-06	5.89802e-06	0.00627976	0.00121924	0.000671735	7.1924e-05	1.38754e-05	6.87912e-05	0.950934
H12	0.00024717	0.00137885	0.00133758	2.98452e-05	0.030212	2.26289e-05	0.482013	2.38831e-05	0.00472797	2.22788e-06	6.60856e-06	0.408602	0.0165645	0.000123415	0.000375655	1.37916e-05	0.00624693	0.000715633	0.00159887	0.954243
H13	0.00035091	0.00127728	0.00223914	3.14592e-05	0.0299221	1.80662e-05	0.480088	7.4094e-06	0.00555504	1.26381e-06	5.89802e-06	0.0165645	0.404443	0.000216488	0.000598451	1.67911e-05	0.00614384	0.00200959	0.00105109	0.95054
C14	0.46483	0.0366579	0.06151	0.518992	0.00367589	0.0380577	0.00387621	0.0192693	0.000248144	0.00631037	0.00627976	0.000123415	0.000216488	4.06817	0.454562	0.463084	0.00203578	0.000484408	0.000408519	6.14879
H15	0.0235472	0.00618788	0.00487863	0.0173976	0.00767878	0.00774693	0.00916358	0.00220019	0.000315939	0.000561362	0.00121924	0.000375655	0.000598451	0.454562	0.368515	0.0137825	0.00117281	0.000325294	0.000238072	0.920467
H16	0.022088	0.00799007	0.00659818	0.0178397	0.000415209	0.00681727	0.000247003	0.00405168	0.00017203	0.0028277	0.000671735	1.37916e-05	1.67911e-05	0.463084	0.0137825	0.391567	0.000499549	0.000193925	0.000142619	0.939019
C17	0.0248434	0.538947	0.0190983	0.001284	0.51532	0.000946986	0.0367084	0.000259588	0.0197824	4.86571e-05	7.1924e-05	0.00624693	0.00614384	0.00203578	0.00117281	0.000499549	4.02797	0.455218	0.451223	6.10782
H18	0.0056725	0.0278984	0.0126112	0.000350894	0.0181009	0.000163494	0.00751066	0.000147897	0.00303602	2.09583e-05	1.38754e-05	0.000715633	0.00200959	0.000484408	0.000325294	0.000193925	0.455218	0.373117	0.0131622	0.920753
H19	0.0059665	0.0272538	0.0167774	0.000778512	0.017704	0.000830055	0.0074103	8.73346e-05	0.00301742	2.81961e-05	6.87912e-05	0.00159887	0.00105109	0.000408519	0.000238072	0.000142619	0.451223	0.0131622	0.363362	0.911108
	14.7662	16.1154	9.22079	6.03999	6.03581	6.07308	6.08525	0.944592	0.958686	0.956715	0.950934	0.954243	0.95054	6.14879	0.920467	0.939019	6.10782	0.920753	0.911108	86.0002

## Sheet: FD
Frobenius_Distance_Full_MATRIX
Conformer ID	1	2	3	4	5	6	7	8	9	10	11	12	13	14	15	16	17	18	19	20	21	22	23	24	25	26	27	28	29	30	31	32	33	34	35	36	37	38	39	40	41	42	43	44	45	46	47	48	49
1	0	0.10752	0.109616	0.0709883	0.125483	0.13391	0.124203	0.106639	0.137233	0.106782	0.0872742	0.127659	0.080884	0.10585	0.108513	0.107334	0.122089	0.0778573	0.0688668	0.126145	0.12604	0.125066	0.119479	0.123188	0.122017	0.122062	0.075448	0.0659256	0.117262	0.107883	0.12281	0.110631	0.109819	0.118564	0.116666	0.110568	0.115803	0.119274	0.0802884	0.116116	0.127476	0.0900523	0.0808922	0.116271	0.114846	0.112967	0.117754	0.101589	0.132285
2		0	0.0621329	0.127541	0.0818369	0.0789002	0.0654152	0.129922	0.0939658	0.0875895	0.104422	0.0718459	0.120488	0.0866319	0.0766276	0.0758345	0.084593	0.110242	0.127952	0.131691	0.126343	0.138681	0.119882	0.131383	0.130634	0.123597	0.139077	0.125787	0.12018	0.0952445	0.137586	0.100955	0.0888965	0.132465	0.122539	0.117226	0.109758	0.132385	0.128475	0.0877643	0.134142	0.11709	0.123961	0.0932586	0.118722	0.129771	0.110744	0.134491	0.143799
3			0	0.129069	0.0736633	0.0829918	0.0712319	0.125534	0.0690202	0.100146	0.123529	0.0638391	0.109844	0.0882817	0.0796253	0.0552846	0.0769452	0.120574	0.132398	0.121118	0.11625	0.129322	0.127043	0.129495	0.133168	0.130582	0.127088	0.124337	0.115921	0.103325	0.125028	0.0994504	0.0981874	0.128117	0.124932	0.122464	0.101234	0.123721	0.117778	0.0684376	0.124333	0.116311	0.112936	0.0918297	0.114922	0.118114	0.115241	0.127134	0.13425
4				0	0.129705	0.123152	0.124462	0.106477	0.133685	0.120825	0.0986034	0.128145	0.0860796	0.120519	0.112067	0.113189	0.127556	0.0682217	0.057114	0.12272	0.123211	0.12132	0.122239	0.129508	0.132605	0.125667	0.062168	0.0611361	0.124415	0.11475	0.121492	0.12182	0.117684	0.127771	0.117944	0.117485	0.117464	0.117419	0.0714114	0.121081	0.131011	0.0867194	0.0730166	0.118622	0.116225	0.114817	0.123834	0.104605	0.138255
5					0	0.0673262	0.0358117	0.10241	0.0449515	0.0774822	0.113047	0.0464723	0.107103	0.0866799	0.053635	0.066257	0.0373555	0.118799	0.128355	0.0911977	0.0856497	0.105111	0.0997632	0.0965885	0.101612	0.104663	0.128953	0.129891	0.081273	0.0780346	0.108582	0.066535	0.0727826	0.0978962	0.100706	0.0990622	0.0738808	0.101072	0.114323	0.0527514	0.102805	0.106674	0.107835	0.0702035	0.0984418	0.10041	0.0919993	0.119772	0.115974
6						0	0.0532292	0.12882	0.0721146	0.105328	0.126265	0.0590499	0.124894	0.103764	0.068605	0.0771605	0.0774741	0.114923	0.135243	0.122904	0.117197	0.134965	0.120802	0.129305	0.136202	0.126699	0.141886	0.136106	0.119973	0.103065	0.132771	0.104395	0.0971544	0.135039	0.127106	0.12514	0.102468	0.129353	0.130092	0.083587	0.135681	0.121813	0.124888	0.091644	0.122445	0.130271	0.119963	0.143071	0.148389
7							0	0.108008	0.052584	0.0799937	0.105624	0.0374061	0.109111	0.0802541	0.0553925	0.064369	0.0478026	0.110025	0.12346	0.100395	0.0942561	0.112555	0.0972694	0.106445	0.109105	0.102386	0.130191	0.125133	0.0929123	0.0733817	0.115777	0.0751924	0.0663223	0.107886	0.101706	0.0972497	0.0829675	0.110758	0.117542	0.0600794	0.109846	0.105549	0.111467	0.0679841	0.0999884	0.108093	0.0923697	0.123374	0.12307
8								0	0.114485	0.0728511	0.0711015	0.120095	0.0601578	0.086947	0.102781	0.108143	0.0941831	0.105409	0.0909854	0.0488414	0.0496976	0.044025	0.0693644	0.0660289	0.0547925	0.0610383	0.0902472	0.102491	0.0551916	0.0628266	0.0739057	0.0606711	0.0670001	0.0512501	0.0545438	0.0501411	0.0685167	0.063488	0.0724521	0.0848928	0.0573718	0.0745152	0.0702509	0.0848298	0.0700635	0.051783	0.0666703	0.0697469	0.0690266
9									0	0.0973651	0.128549	0.0471717	0.110663	0.0989728	0.0729889	0.0614503	0.0563551	0.127434	0.137172	0.0968352	0.0914818	0.111252	0.113127	0.111307	0.118439	0.119566	0.125949	0.13515	0.0982037	0.0939833	0.109723	0.0840651	0.0892209	0.112189	0.114492	0.113116	0.0826466	0.107216	0.11416	0.0488947	0.106739	0.112413	0.107894	0.0762352	0.103982	0.101974	0.104302	0.122149	0.118357
10										0	0.0566031	0.089271	0.0750644	0.0484737	0.0728096	0.0874615	0.0655211	0.100848	0.1053	0.082455	0.0791607	0.086332	0.0744359	0.0747779	0.0579416	0.064378	0.113694	0.109339	0.0588233	0.0501991	0.0908332	0.0427515	0.0476341	0.0672383	0.0656577	0.0628681	0.064151	0.0741128	0.0928701	0.0672292	0.0725527	0.0745048	0.088935	0.05852	0.064627	0.0753255	0.0643721	0.0892595	0.0892921
11											0	0.11581	0.0655585	0.0634757	0.0980086	0.106973	0.102567	0.0791975	0.074344	0.0974061	0.0960279	0.0952474	0.0727026	0.0863302	0.0706087	0.0626111	0.0942583	0.0820586	0.0796416	0.0595722	0.0983972	0.0728042	0.0608493	0.0786349	0.0664462	0.0571413	0.0874928	0.088556	0.0808812	0.0977017	0.0823741	0.0612045	0.0799732	0.0782601	0.0711889	0.0809515	0.0733934	0.0791818	0.0934728
12												0	0.110504	0.0798279	0.0623736	0.0581036	0.0581522	0.114334	0.129059	0.112009	0.106232	0.124371	0.110023	0.114838	0.119159	0.114427	0.129447	0.121587	0.102258	0.0884867	0.118037	0.0860461	0.0818602	0.11682	0.113168	0.110692	0.0785302	0.109221	0.117943	0.0581908	0.113299	0.104825	0.112332	0.0654514	0.0993026	0.111866	0.10546	0.127521	0.128889
13													0	0.074194	0.0940524	0.0939153	0.0969382	0.0779386	0.0699085	0.0837597	0.082788	0.0817443	0.0882803	0.0869794	0.0783072	0.0789052	0.0618919	0.0703887	0.0760272	0.0776741	0.0807045	0.0744409	0.0791963	0.0738919	0.0742812	0.0734837	0.0762292	0.0736206	0.0412324	0.0810073	0.0723168	0.0517429	0.0428157	0.0746095	0.0653935	0.0567998	0.086154	0.0624217	0.0826213
14														0	0.0786409	0.0809155	0.0743297	0.0975721	0.10257	0.0991108	0.0953709	0.101517	0.0817293	0.0897396	0.0782417	0.0709992	0.112332	0.0972686	0.0764703	0.0579747	0.097207	0.062675	0.0534546	0.084014	0.0729378	0.0708032	0.0683948	0.082812	0.0964874	0.0713507	0.0794937	0.0706009	0.0935454	0.0523328	0.0609711	0.0857789	0.0779004	0.0954156	0.0992737
15															0	0.0585382	0.0529099	0.0824472	0.106416	0.0990001	0.0940218	0.11046	0.0952915	0.0966859	0.101083	0.0970945	0.116978	0.111814	0.0837839	0.0764445	0.105961	0.0717418	0.0722208	0.100111	0.0930447	0.0971273	0.078431	0.0998193	0.10092	0.0650485	0.104626	0.0901704	0.0960326	0.0633525	0.0898187	0.101052	0.0959235	0.113699	0.120686
16																0	0.0721839	0.0958365	0.115176	0.0998479	0.0946804	0.108999	0.0976785	0.100704	0.111355	0.109304	0.109124	0.107561	0.0956476	0.0847976	0.0942033	0.0808025	0.0799575	0.108332	0.104546	0.102658	0.079986	0.102009	0.095214	0.0524882	0.0998774	0.0950971	0.0917676	0.0718303	0.093457	0.0960733	0.100136	0.108198	0.117064
17																	0	0.111331	0.118508	0.0837301	0.0781001	0.0963848	0.0955574	0.093362	0.0904273	0.0906222	0.121408	0.123527	0.0726541	0.0692649	0.103972	0.0570014	0.0643109	0.0858361	0.087135	0.0879237	0.0671995	0.0901401	0.107934	0.0521484	0.0932565	0.0955564	0.10113	0.0609372	0.0844665	0.0908732	0.0828879	0.112174	0.106931
18																		0	0.057159	0.118591	0.11609	0.121524	0.100722	0.111866	0.114775	0.0997179	0.0812794	0.0672359	0.109611	0.0967247	0.108756	0.10502	0.0965419	0.112824	0.0983289	0.100866	0.107228	0.11072	0.075043	0.108868	0.116263	0.0694319	0.0760702	0.0928946	0.0961355	0.105431	0.112176	0.0997283	0.127764
19																			0	0.112076	0.112974	0.111142	0.106417	0.113775	0.110216	0.100158	0.0522319	0.0435905	0.105598	0.0975869	0.113047	0.10724	0.101669	0.106681	0.091959	0.095417	0.108672	0.10359	0.0654611	0.117418	0.111032	0.0666013	0.0677209	0.103583	0.0946712	0.100271	0.107948	0.0891205	0.119991
20																				0	0.020233	0.0340317	0.0693569	0.0617303	0.0644752	0.0709983	0.104257	0.121996	0.0467675	0.0624565	0.0655992	0.0557144	0.0688063	0.0496358	0.0598631	0.0598331	0.0634924	0.0609381	0.0857568	0.0721906	0.0582441	0.0854387	0.0795195	0.0823411	0.0729649	0.0517442	0.0664904	0.0812694	0.0680373
21																					0	0.035794	0.0670984	0.0612979	0.0635539	0.0677473	0.106393	0.122531	0.0507964	0.0627632	0.0646662	0.0509462	0.0631353	0.0501872	0.058707	0.0579238	0.0587625	0.0613402	0.086161	0.065554	0.0571787	0.0873802	0.0824886	0.076832	0.0711014	0.0509702	0.066122	0.0830708	0.0699715
22																						0	0.0707869	0.0653917	0.06306	0.0727176	0.100987	0.119317	0.057347	0.0695785	0.0641618	0.0635948	0.0741452	0.0525725	0.0572312	0.0579693	0.0695482	0.0568456	0.0813496	0.0855092	0.0587671	0.0868702	0.0790325	0.0912978	0.0710211	0.0499277	0.0671113	0.0770118	0.0678366
23																							0	0.036205	0.0556521	0.0527191	0.11333	0.113611	0.0581794	0.0468413	0.0584444	0.0554777	0.0482135	0.0579005	0.0538467	0.0407319	0.0705342	0.0749794	0.0937501	0.0867243	0.0626071	0.0753509	0.0910425	0.0717528	0.0644299	0.0679154	0.0639235	0.0817925	0.0761218
24																								0	0.0466166	0.0627358	0.113117	0.119952	0.0447637	0.0599723	0.0476472	0.0497746	0.0628368	0.0447348	0.0585958	0.053171	0.0635247	0.0636359	0.0913131	0.083752	0.0530509	0.0786263	0.0880188	0.0758273	0.0649296	0.0587235	0.0696422	0.0796494	0.0684263
25																									0	0.0422105	0.113064	0.117593	0.0426826	0.0560848	0.0716836	0.0452335	0.0585642	0.0346657	0.0497334	0.043597	0.063595	0.0587893	0.0928446	0.088067	0.0412631	0.076563	0.0903917	0.0743079	0.0579736	0.0580368	0.0627158	0.0813566	0.0677684
26																										0	0.113703	0.112082	0.056739	0.0518424	0.0781204	0.0579809	0.0520026	0.0521536	0.0382817	0.0408075	0.0718507	0.0692474	0.0954593	0.0911625	0.0548568	0.0700545	0.0937374	0.0674874	0.0549178	0.0673957	0.0633407	0.0847582	0.076501
27																											0	0.0494033	0.106741	0.106651	0.100313	0.107889	0.111149	0.104924	0.103121	0.102512	0.103173	0.0949276	0.0444584	0.108743	0.103156	0.0707934	0.0484881	0.107838	0.0951431	0.0852514	0.110805	0.0787247	0.109687
28																												0	0.113396	0.104765	0.114013	0.112107	0.107788	0.114247	0.105535	0.104154	0.104212	0.103032	0.0643829	0.115347	0.113062	0.0676362	0.067322	0.103628	0.0954412	0.102189	0.115006	0.0945513	0.125838
29																													0	0.0434522	0.0678586	0.0331178	0.0517045	0.0295297	0.0432645	0.0469917	0.0534535	0.0549987	0.0846537	0.0698446	0.0492135	0.0676163	0.0773625	0.0611041	0.0531873	0.0495876	0.0574422	0.0762682	0.0631291
30																														0	0.0784385	0.035672	0.0199131	0.0548407	0.0457054	0.034266	0.0607438	0.0715725	0.0882877	0.065817	0.0637372	0.0642582	0.0813628	0.0517922	0.0547396	0.0643497	0.0484817	0.0788005	0.0744809
31																															0	0.069693	0.0801345	0.0660027	0.0716093	0.0726537	0.0717694	0.0639734	0.0775337	0.0809526	0.0574974	0.0774981	0.0770224	0.0844546	0.0686022	0.054495	0.0828057	0.0687252	0.0695894
32																																0	0.0330646	0.0420187	0.0528939	0.0449281	0.0459745	0.0603698	0.0857359	0.0518278	0.0547215	0.0712279	0.0804979	0.049659	0.0544915	0.0539452	0.0544374	0.0793643	0.0699954
33																																	0	0.0594078	0.0500616	0.0376318	0.0587847	0.0751164	0.0914406	0.0600331	0.0656951	0.0700873	0.0869215	0.0461484	0.0564552	0.0671149	0.0522075	0.0833783	0.0788433
34																																		0	0.0446068	0.0394562	0.059109	0.05373	0.0841505	0.0815578	0.0443502	0.0705113	0.0795309	0.0717694	0.054715	0.0418724	0.0610083	0.0734784	0.0559314
35																																			0	0.0364887	0.067527	0.0582404	0.0824882	0.085412	0.0537772	0.0602854	0.0798446	0.063625	0.0414478	0.0569898	0.0566089	0.0718518	0.0673564
36																																				0	0.0645173	0.0649263	0.0850009	0.0822856	0.0530397	0.0647754	0.0813207	0.0662817	0.0523394	0.0532097	0.0506503	0.0719152	0.0630871
37																																					0	0.0411419	0.0846466	0.0573742	0.0603366	0.0696507	0.0806753	0.0497891	0.0507887	0.0595969	0.0727684	0.0900517	0.0836826
38																																						0	0.0776264	0.0816007	0.0544529	0.0623834	0.075453	0.0688242	0.0425236	0.0517981	0.073914	0.0791261	0.0750094
39																																						0.0776264	0	0.0878243	0.0828327	0.0539024	0.0189778	0.0867656	0.0740875	0.0605348	0.0945319	0.0583081	0.0892803
40																																								0	0.0768925	0.0863272	0.0824648	0.0537655	0.0758264	0.0704783	0.0800553	0.09097	0.0889086
41																																									0	0.0721742	0.0805893	0.0692721	0.0508019	0.0424608	0.0667541	0.0719281	0.0553987
42																																										0	0.0488908	0.0587887	0.0434825	0.0614707	0.0784108	0.0632468	0.0818621
43																																											0	0.082223	0.0716944	0.0571883	0.0891678	0.0585962	0.0851948
44																																												0	0.0433567	0.0690117	0.0730534	0.0891479	0.0866954
45																																													0	0.0517528	0.0665456	0.0715428	0.069914
46																																														0	0.0671771	0.0575307	0.0486904
47																																															0	0.0816896	0.0736158
48																																																0	0.0484932
49																																																	0
