# Supplementary material for: Comparative Analysis of Molecular Conformers Using Localization–Delocalization Matrices and Frobenius Distance
Source: Research Square preprint supplement (doi:10.21203/rs.3.rs-7999250/v1), 2025-11-18
Supplement: Supplementary file 4 [file a2edaa717ba8627381dea232.xlsx]

## Sheet: Boltzman_distribution
Conformer ID	E (HF)	Delta E(HF)	HF Conversion	Boltzman distribution	Boltzman's weight	% (percentage)	Conformer_type	FD_R	FD_W
1	-1031	3e-07	0.000188251	0.999684	0.371813	0.371813	1RCP	0	0.02
2	-1031	0.0010316	0.647332	0.33765	0.125582	0.125582	1RCP	0.05	0.04
3	-1031	0.0011039	0.692701	0.31291	0.116381	0.116381	1RCP	0.05	0.04
4	-1031	0.0012146	0.762165	0.278496	0.103581	0.103581	Acyclic	0.05	0.03
5	-1031	0.001537	0.964472	0.19836	0.0737761	0.0737761	1RCP	0.06	0.04
6	-1031	0.0017799	1.11689	0.153613	0.0571332	0.0571332	1RCP	0.05	0.04
7	-1031	0.0023786	1.49258	0.0818027	0.0304249	0.0304249	1RCP	0.06	0.05
8	-1031	0.0028922	1.81486	0.0476439	0.0177202	0.0177202	Acyclic	0.07	0.07
9	-1031	0.0029095	1.82572	0.0467842	0.0174005	0.0174005	1RCP	0.04	0.04
10	-1031	0.00308	1.93271	0.039099	0.0145421	0.0145421	1RCP	0.06	0.04
11	-1031	0.003133	1.96597	0.0369777	0.0137531	0.0137531	Acyclic	0.05	0.04
12	-1031	0.0035056	2.19977	0.0249821	0.00929159	0.00929159	2RCP	0.07	0.06
13	-1031	0.0038063	2.38846	0.0182046	0.00677085	0.00677085	1RCP	0.06	0.04
14	-1031	0.0038105	2.3911	0.0181243	0.00674099	0.00674099	1RCP	0.05	0.04
15	-1031	0.0039063	2.45121	0.016386	0.00609445	0.00609445	Acyclic	0.07	0.07
16	-1031	0.0040305	2.52915	0.0143781	0.00534766	0.00534766	Acyclic	0.05	0.04
17	-1031	0.0040432	2.53712	0.0141872	0.00527666	0.00527666	Acyclic	0.05	0.04
18	-1031	0.0042776	2.68421	0.0110855	0.00412304	0.00412304	1RCP	0.06	0.04
19	-1031	0.0043048	2.70127	0.0107727	0.00400668	0.00400668	Acyclic	0.06	0.04
20	-1031	0.0044313	2.78065	0.00942977	0.00350722	0.00350722	Acyclic	0.06	0.04
21	-1031	0.0044378	2.78473	0.00936548	0.00348331	0.00348331	Acyclic	0.05	0.04
22	-1031	0.0045036	2.82602	0.00873884	0.00325024	0.00325024	Acyclic	0.06	0.04
				2.68868	1	1
							0.0486011
							0.942107

## Sheet: LDM
LDM — diallyl_disufide_1_LIDI_matrix
	S1	S2	C3	C4	C5	C6	C7	C8	H9	H10	H11	H12	H13	H14	H15	H16	H17	H18
S1	14.6164	0.66265	0.528647	0.0385426	0.0398514	0.0148231	0.0216878	0.0131696	0.0287937	0.0266549	0.00362187	0.00872588	0.0060342	0.000523416	0.00132392	0.00152219	0.000363171	0.00206066
S2	0.66265	14.6374	0.0403424	0.524469	0.0091997	0.040688	0.00777028	0.0230701	0.0073295	0.00855852	0.0277817	0.0271054	0.000513411	0.00674062	0.00260293	0.000296125	0.0015673	0.00131048
C3	0.528647	0.0403424	4.01058	0.00180063	0.516737	0.000681249	0.0361547	0.000349159	0.463453	0.464227	0.000636196	0.000293982	0.0197713	9.70554e-05	0.00628063	0.00629919	1.07668e-05	0.000127447
C4	0.0385426	0.524469	0.00180063	4.01408	0.00465152	0.517832	0.00413149	0.0368411	0.000295804	0.000444582	0.457799	0.464775	0.000339392	0.0198507	0.000148464	0.000136099	0.00627661	0.00629628
C5	0.0398514	0.0091997	0.516737	0.00465152	3.96634	0.000330798	0.912844	0.000350964	0.018558	0.0196506	0.00958282	0.000325799	0.472662	0.000152633	0.0298187	0.0304749	2.28284e-05	0.000945509
C6	0.0148231	0.040688	0.000681249	0.517832	0.000330798	3.96442	0.000361888	0.916803	0.00022525	6.63871e-05	0.0178932	0.0194562	0.000146985	0.473242	3.69903e-05	1.86613e-05	0.0302625	0.0302277
C7	0.0216878	0.00777028	0.0361547	0.00413149	0.912844	0.000361888	4.08222	8.15743e-05	0.00627434	0.00937303	0.0089628	0.000197559	0.0292234	0.00018324	0.480195	0.484176	6.19337e-06	0.000217932
C8	0.0131696	0.0230701	0.000349159	0.0368411	0.000350964	0.916803	8.15743e-05	4.07849	0.000180883	4.85256e-05	0.00614392	0.00913199	0.000754168	0.0291062	1.98204e-05	8.32614e-06	0.484114	0.480661
H9	0.0287937	0.0073295	0.463453	0.000295804	0.018558	0.00022525	0.00627434	0.000180883	0.393857	0.0145832	6.17856e-05	1.85303e-05	0.00514743	1.03592e-05	0.00416857	0.000452562	8.51889e-06	6.77576e-05
H10	0.0266549	0.00855852	0.464227	0.000444582	0.0196506	6.63871e-05	0.00937303	4.85256e-05	0.0145832	0.398815	0.000119847	0.000162107	0.00147053	1.63412e-05	0.000496354	0.000808231	2.26834e-06	6.42049e-06
H11	0.00362187	0.0277817	0.000636196	0.457799	0.00958282	0.0178932	0.0089628	0.00614392	6.17856e-05	0.000119847	0.38204	0.0143206	0.00085369	0.00487812	0.000240159	0.000503161	0.00044151	0.00402933
H12	0.00872588	0.0271054	0.000293982	0.464775	0.000325799	0.0194562	0.000197559	0.00913199	1.85303e-05	0.000162107	0.0143206	0.400785	2.32468e-05	0.00151325	8.18752e-06	9.5749e-06	0.000798439	0.000494961
H13	0.0060342	0.000513411	0.0197713	0.000339392	0.472662	0.000146985	0.0292234	0.000754168	0.00514743	0.00147053	0.00085369	2.32468e-05	0.413411	5.87694e-05	0.00677774	0.00366477	7.44284e-05	0.00122395
H14	0.000523416	0.00674062	9.70554e-05	0.0198507	0.000152633	0.473242	0.00018324	0.0291062	1.03592e-05	1.63412e-05	0.00487812	0.00151325	5.87694e-05	0.412542	7.75534e-06	9.53607e-06	0.00364001	0.00676318
H15	0.00132392	0.00260293	0.00628063	0.000148464	0.0298187	3.69903e-05	0.480195	1.98204e-05	0.00416857	0.000496354	0.000240159	8.18752e-06	0.00677774	7.75534e-06	0.408892	0.0168065	1.51868e-06	3.48869e-05
H16	0.00152219	0.000296125	0.00629919	0.000136099	0.0304749	1.86613e-05	0.484176	8.32614e-06	0.000452562	0.000808231	0.000503161	9.5749e-06	0.00366477	9.53607e-06	0.0168065	0.412765	7.98081e-07	2.12998e-05
H17	0.000363171	0.0015673	1.07668e-05	0.00627661	2.28284e-05	0.0302625	6.19337e-06	0.484114	8.51889e-06	2.26834e-06	0.00044151	0.000798439	7.44284e-05	0.00364001	1.51868e-06	7.98081e-07	0.412299	0.0169212
H18	0.00206066	0.00131048	0.000127447	0.00629628	0.000945509	0.0302277	0.000217932	0.480661	6.77576e-05	6.42049e-06	0.00402933	0.000494961	0.00122395	0.00676318	3.48869e-05	2.12998e-05	0.0169212	0.415027
LDM — diallyl_disufide_2_LIDI_matrix
	S1	S2	C3	C4	C5	C6	C7	C8	H9	H10	H11	H12	H13	H14	H15	H16	H17	H18
S1	14.6387	0.663379	0.527769	0.0386098	0.0374441	0.0101906	0.021255	0.00817963	0.0295154	0.0277188	0.00585257	0.00830666	0.00550572	0.000593452	0.0012895	0.00155129	0.00183973	0.000278829
S2	0.663379	14.6386	0.0385971	0.527902	0.0101831	0.0374337	0.00818836	0.0212485	0.00584564	0.00830772	0.0294991	0.0277174	0.000593459	0.0055056	0.00183866	0.000278919	0.00128879	0.00155111
C3	0.527769	0.0385971	4.00831	0.00224687	0.517964	0.000844171	0.0370758	0.000508248	0.463817	0.463164	0.00036802	0.000596252	0.0194675	0.000214883	0.00641116	0.0063023	6.64237e-05	6.84594e-05
C4	0.0386098	0.527902	0.00224687	4.00867	0.000839719	0.51801	0.000504929	0.0370872	0.000368396	0.00059624	0.463862	0.463239	0.000214848	0.0194868	6.64214e-05	6.83933e-05	0.00641849	0.00630412
C5	0.0374441	0.0101831	0.517964	0.000839719	3.95783	0.00960369	0.911803	0.00678283	0.0185443	0.0195127	0.000112362	0.000135947	0.468974	0.00403075	0.0300257	0.030344	0.000170279	0.00054484
C6	0.0101906	0.0374337	0.000844171	0.51801	0.00960369	3.9579	0.00677128	0.911868	0.000112701	0.000135728	0.0185594	0.0195126	0.00404215	0.468979	0.000170216	0.000546165	0.0300438	0.0303551
C7	0.021255	0.00818836	0.0370758	0.000504929	0.911803	0.00677128	4.07961	0.00257222	0.006505	0.00961078	0.00015679	4.41677e-05	0.0281116	0.00657389	0.480783	0.483954	0.000154828	0.000280782
C8	0.00817963	0.0212485	0.000508248	0.0370872	0.00678283	0.911868	0.00257222	4.07964	0.000156872	4.41529e-05	0.00650567	0.00961036	0.00658445	0.0281144	0.000154884	0.000280711	0.480789	0.483963
H9	0.0295154	0.00584564	0.463817	0.000368396	0.0185443	0.000112701	0.006505	0.000156872	0.396143	0.0147531	0.000136497	3.04022e-05	0.0051183	1.44059e-05	0.004403	0.000472215	3.13269e-05	2.44548e-05
H10	0.0277188	0.00830772	0.463164	0.00059624	0.0195127	0.000135728	0.00961078	4.41529e-05	0.0147531	0.397652	3.0367e-05	0.000259162	0.00134874	9.49055e-05	0.000501513	0.000799904	3.48136e-06	4.07446e-06
H11	0.00585257	0.0294991	0.00036802	0.463862	0.000112362	0.0185594	0.00015679	0.00650567	0.000136497	3.0367e-05	0.39613	0.0147525	1.44319e-05	0.0051182	3.12983e-05	2.44547e-05	0.0044025	0.00047218
H12	0.00830666	0.0277174	0.000596252	0.463239	0.000135947	0.0195126	4.41677e-05	0.00961036	3.04022e-05	0.000259162	0.0147525	0.397648	9.50141e-05	0.00134891	3.4845e-06	4.07378e-06	0.000501502	0.000799924
H13	0.00550572	0.000593459	0.0194675	0.000214848	0.468974	0.00404215	0.0281116	0.00658445	0.0051183	0.00134874	1.44319e-05	9.50141e-05	0.40415	0.000224312	0.00667236	0.00360386	0.000186566	0.000957664
H14	0.000593452	0.0055056	0.000214883	0.0194868	0.00403075	0.468979	0.00657389	0.0281144	1.44059e-05	9.49055e-05	0.0051182	0.00134891	0.000224312	0.404166	0.000186017	0.000956219	0.00667237	0.00360321
H15	0.0012895	0.00183866	0.00641116	6.64214e-05	0.0300257	0.000170216	0.480783	0.000154884	0.004403	0.000501513	3.12983e-05	3.4845e-06	0.00667236	0.000186017	0.412323	0.0169718	7.16943e-06	2.2789e-05
H16	0.00155129	0.000278919	0.0063023	6.83933e-05	0.030344	0.000546165	0.483954	0.000280711	0.000472215	0.000799904	2.44547e-05	4.07378e-06	0.00360386	0.000956219	0.0169718	0.414755	2.27952e-05	0.000158778
H17	0.00183973	0.00128879	6.64237e-05	0.00641849	0.000170279	0.0300438	0.000154828	0.480789	3.13269e-05	3.48136e-06	0.0044025	0.000501502	0.000186566	0.00667237	7.16943e-06	2.27952e-05	0.412317	0.0169718
H18	0.000278829	0.00155111	6.84594e-05	0.00630412	0.00054484	0.0303551	0.000280782	0.483963	2.44548e-05	4.07446e-06	0.00047218	0.000799924	0.000957664	0.00360321	2.2789e-05	0.000158778	0.0169718	0.414757
LDM — diallyl_disufide_3_LIDI_matrix
	S1	S2	C3	C4	C5	C6	C7	C8	H9	H10	H11	H12	H13	H14	H15	H16	H17	H18
S1	14.6464	0.661428	0.527193	0.0388915	0.0400281	0.00896592	0.0227548	0.00524887	0.0263675	0.0292042	0.00955455	0.00297289	0.00577968	0.000477272	0.0013677	0.00151852	0.000495194	0.000242327
S2	0.661428	14.6278	0.0404255	0.5227	0.0106853	0.0437204	0.00995739	0.0215491	0.00854605	0.00709809	0.0264413	0.029778	0.000606111	0.00603873	0.00354942	0.000335439	0.00111896	0.00129326
C3	0.527193	0.0404255	4.00997	0.00178786	0.517297	0.000383887	0.0360097	0.000165601	0.464838	0.463369	0.000713995	0.000400522	0.0198552	0.000120753	0.00624025	0.00628089	1.4811e-05	1.81354e-05
C4	0.0388915	0.5227	0.00178786	4.01207	0.00506781	0.516575	0.00396811	0.0374316	0.000409942	0.000345463	0.456562	0.466765	0.000548255	0.0194411	0.000206748	0.000127255	0.00636781	0.00631429
C5	0.0400281	0.0106853	0.517297	0.00506781	3.9661	0.000549084	0.910877	0.000234023	0.0195111	0.0185702	0.00970536	0.000287886	0.473157	0.000898248	0.0296268	0.0303995	3.01655e-05	3.00117e-05
C6	0.00896592	0.0437204	0.000383887	0.516575	0.000549084	3.97602	0.00127443	0.920208	0.000137486	4.24176e-05	0.018468	0.0187103	5.18625e-05	0.472191	0.000154178	0.000108594	0.0302497	0.0302624
C7	0.0227548	0.00995739	0.0360097	0.00396811	0.910877	0.00127443	4.08091	0.000230268	0.00884683	0.00624058	0.0068756	0.000415678	0.0292475	0.00233815	0.479687	0.484043	2.83855e-05	7.68371e-05
C8	0.00524887	0.0215491	0.000165601	0.0374316	0.000234023	0.920208	0.000230268	4.08381	9.77658e-05	8.97942e-06	0.00902576	0.00636423	6.02125e-05	0.0291876	2.45331e-05	2.47946e-05	0.483927	0.481104
H9	0.0263675	0.00854605	0.464838	0.000409942	0.0195111	0.000137486	0.00884683	9.77658e-05	0.39913	0.0146031	0.000102668	7.22106e-05	0.00161487	3.30744e-05	0.000490536	0.000819475	8.60226e-06	5.49338e-06
H10	0.0292042	0.00709809	0.463369	0.000345463	0.0185702	4.24176e-05	0.00624058	8.97942e-06	0.0146031	0.39347	0.000129509	0.000121903	0.00511238	1.5293e-05	0.00405843	0.000445904	1.46303e-06	1.86375e-06
H11	0.00955455	0.0264413	0.000713995	0.456562	0.00970536	0.018468	0.0068756	0.00902576	0.000102668	0.000129509	0.377902	0.0143984	0.00147017	0.00164951	0.000179542	0.00033568	0.000771658	0.000509163
H12	0.00297289	0.029778	0.000400522	0.466765	0.000287886	0.0187103	0.000415678	0.00636423	7.22106e-05	0.000121903	0.0143984	0.402549	2.65265e-05	0.00512623	8.39485e-05	1.56598e-05	0.000462953	0.00403283
H13	0.00577968	0.000606111	0.0198552	0.000548255	0.473157	5.18625e-05	0.0292475	6.02125e-05	0.00161487	0.00511238	0.00147017	2.65265e-05	0.413761	3.37529e-05	0.00677727	0.00366341	3.9908e-06	2.7708e-06
H14	0.000477272	0.00603873	0.000120753	0.0194411	0.000898248	0.472191	0.00233815	0.0291876	3.30744e-05	1.5293e-05	0.00164951	0.00512623	3.37529e-05	0.408908	0.000384315	0.000246431	0.00362631	0.00673563
H15	0.0013677	0.00354942	0.00624025	0.000206748	0.0296268	0.000154178	0.479687	2.45331e-05	0.000490536	0.00405843	0.000179542	8.39485e-05	0.00677727	0.000384315	0.407819	0.016782	3.36258e-06	1.31823e-05
H16	0.00151852	0.000335439	0.00628089	0.000127255	0.0303995	0.000108594	0.484043	2.47946e-05	0.000819475	0.000445904	0.00033568	1.56598e-05	0.00366341	0.000246431	0.016782	0.412223	2.80596e-06	7.54055e-06
H17	0.000495194	0.00111896	1.4811e-05	0.00636781	3.01655e-05	0.0302497	2.83855e-05	0.483927	8.60226e-06	1.46303e-06	0.000771658	0.000462953	3.9908e-06	0.00362631	3.36258e-06	2.80596e-06	0.410838	0.0168598
H18	0.000242327	0.00129326	1.81354e-05	0.00631429	3.00117e-05	0.0302624	7.68371e-05	0.481104	5.49338e-06	1.86375e-06	0.000509163	0.00403283	2.7708e-06	0.00673563	1.31823e-05	7.54055e-06	0.0168598	0.411885
LDM — diallyl_disufide_4_LIDI_matrix
	S1	S2	C3	C4	C5	C6	C7	C8	H9	H10	H11	H12	H13	H14	H15	H16	H17	H18
S1	14.6331	0.66119	0.5237	0.0400976	0.0427439	0.00980772	0.0210389	0.00824906	0.0288012	0.0280811	0.00685268	0.00857803	0.00598729	0.000528649	0.00122474	0.00110262	0.000312836	0.00269225
S2	0.66119	14.6458	0.0390473	0.528533	0.00900859	0.0399482	0.00510098	0.0220295	0.0106296	0.00262987	0.0292194	0.026655	0.00033981	0.00634762	0.000247366	0.00048743	0.0015304	0.00134376
C3	0.5237	0.0390473	4.01307	0.00174389	0.516212	0.0046208	0.0374438	0.00410994	0.463517	0.459567	0.000328472	0.000379753	0.0195898	0.000476789	0.006314	0.00634576	0.000151114	0.000146076
C4	0.0400976	0.528533	0.00174389	4.01041	0.000510401	0.517013	0.000272136	0.0362602	0.000369003	0.000557014	0.463388	0.464251	0.000109039	0.0198315	2.46097e-05	2.00706e-05	0.00629975	0.0062989
C5	0.0427439	0.00900859	0.516212	0.000510401	3.97718	0.000442523	0.920884	0.00035701	0.0189853	0.0177711	4.4069e-05	0.000218262	0.473387	4.97361e-05	0.0302809	0.0302254	2.12204e-05	1.97931e-05
C6	0.00980772	0.0399482	0.0046208	0.517013	0.000442523	3.96586	9.27455e-05	0.912622	0.000246544	0.00888542	0.0185446	0.0195636	0.000159587	0.473063	0.000115643	9.89271e-06	0.0304823	0.0297576
C7	0.0210389	0.00510098	0.0374438	0.000272136	0.920884	9.27455e-05	4.08242	0.000152102	0.00915059	0.00632685	2.29121e-05	0.000168665	0.0294598	1.89298e-05	0.481012	0.483824	3.0486e-05	1.74944e-05
C8	0.00824906	0.0220295	0.00410994	0.0362602	0.00035701	0.912622	0.000152102	4.08137	0.000214115	0.00884554	0.00630392	0.0092484	0.000171408	0.0291612	0.000271987	1.88608e-05	0.484165	0.480007
H9	0.0288012	0.0106296	0.463517	0.000369003	0.0189853	0.000246544	0.00915059	0.000214115	0.39261	0.014634	0.00018659	2.06725e-05	0.00165329	9.31734e-05	0.000530549	0.000812723	1.4549e-05	2.90912e-05
H10	0.0280811	0.00262987	0.459567	0.000557014	0.0177711	0.00888542	0.00632685	0.00884554	0.014634	0.38691	7.2947e-05	0.000104309	0.00480405	0.000811922	0.00396053	0.000457152	0.000541747	0.000242458
H11	0.00685268	0.0292194	0.000328472	0.463388	4.4069e-05	0.0185446	2.29121e-05	0.00630392	0.00018659	7.2947e-05	0.393754	0.0146018	6.00849e-06	0.005174	2.45031e-06	2.03426e-06	0.000454814	0.00418532
H12	0.00857803	0.026655	0.000379753	0.464251	0.000218262	0.0195636	0.000168665	0.0092484	2.06725e-05	0.000104309	0.0146018	0.398729	2.4384e-05	0.00148543	9.78768e-06	1.14872e-05	0.000808034	0.000494948
H13	0.00598729	0.00033981	0.0195898	0.000109039	0.473387	0.000159587	0.0294598	0.000171408	0.00165329	0.00480405	6.00849e-06	2.4384e-05	0.409698	1.28517e-05	0.00677356	0.00363955	1.4163e-05	6.1919e-06
H14	0.000528649	0.00634762	0.000476789	0.0198315	4.97361e-05	0.473063	1.89298e-05	0.0291612	9.31734e-05	0.000811922	0.005174	0.00148543	1.28517e-05	0.413166	5.71756e-06	1.30825e-06	0.0036628	0.00677377
H15	0.00122474	0.000247366	0.006314	2.46097e-05	0.0302809	0.000115643	0.481012	0.000271987	0.000530549	0.00396053	2.45031e-06	9.78768e-06	0.00677356	5.71756e-06	0.412531	0.0168638	6.23665e-05	2.12757e-05
H16	0.00110262	0.00048743	0.00634576	2.00706e-05	0.0302254	9.89271e-06	0.483824	1.88608e-05	0.000812723	0.000457152	2.03426e-06	1.14872e-05	0.00363955	1.30825e-06	0.0168638	0.41044	4.83832e-06	1.60096e-06
H17	0.000312836	0.0015304	0.000151114	0.00629975	2.12204e-05	0.0304823	3.0486e-05	0.484165	1.4549e-05	0.000541747	0.000454814	0.000808034	1.4163e-05	0.0036628	6.23665e-05	4.83832e-06	0.413102	0.0168085
H18	0.00269225	0.00134376	0.000146076	0.0062989	1.97931e-05	0.0297576	1.74944e-05	0.480007	2.90912e-05	0.000242458	0.00418532	0.000494948	6.1919e-06	0.00677377	2.12757e-05	1.60096e-06	0.0168085	0.408343
LDM — diallyl_disufide_5_LIDI_matrix
	S1	S2	C3	C4	C5	C6	C7	C8	H9	H10	H11	H12	H13	H14	H15	H16	H17	H18
S1	14.6303	0.661359	0.526983	0.0403172	0.0421976	0.00961848	0.0211569	0.00865961	0.028522	0.0259332	0.00860651	0.00707309	0.00381795	0.000563914	0.000975568	0.00151987	0.00289959	0.000307685
S2	0.661359	14.6367	0.0383979	0.527615	0.00843441	0.0398399	0.00179908	0.0220788	0.00557559	0.00857079	0.0266373	0.0290345	0.0114394	0.00618427	0.000451424	0.000200813	0.00133251	0.00151822
C3	0.526983	0.0383979	4.01474	0.00176108	0.516156	0.00481558	0.0370205	0.0040318	0.4568	0.464453	0.000436953	0.000293453	0.019212	0.000456339	0.00637279	0.00634193	0.000163911	0.000127803
C4	0.0403172	0.527615	0.00176108	4.0107	0.000532709	0.51723	0.000175985	0.036214	0.000711055	0.000253247	0.464358	0.463333	0.000410632	0.0198459	2.75409e-05	2.51009e-05	0.00628144	0.00629075
C5	0.0421976	0.00843441	0.516156	0.000532709	3.97179	0.000311527	0.923781	0.000404232	0.0186873	0.0183969	6.72315e-05	0.000165916	0.469835	4.24027e-05	0.0307515	0.0305248	4.69251e-05	1.84747e-05
C6	0.00961848	0.0398399	0.00481558	0.51723	0.000311527	3.96731	0.000273634	0.912472	0.0102075	0.000295311	0.0195474	0.0185855	9.58528e-05	0.473148	1.66641e-05	2.53635e-05	0.0297846	0.030408
C7	0.0211569	0.00179908	0.0370205	0.000175985	0.923781	0.000273634	4.08461	0.000266123	0.00901363	0.00653177	3.87775e-05	5.89756e-05	0.0289289	2.03239e-05	0.482077	0.484208	2.13321e-05	1.16985e-05
C8	0.00865961	0.0220788	0.0040318	0.036214	0.000404232	0.912472	0.000266123	4.08111	0.00853242	0.000172361	0.00921004	0.00627109	2.41313e-05	0.0292278	1.45079e-05	3.29976e-05	0.479985	0.484064
H9	0.028522	0.00557559	0.4568	0.000711055	0.0186873	0.0102075	0.00901363	0.00853242	0.377921	0.0142463	0.000118846	8.92852e-05	0.00107589	0.00116864	0.000433554	0.000729822	0.000223443	0.000455226
H10	0.0259332	0.00857079	0.464453	0.000253247	0.0183969	0.000295311	0.00653177	0.000172361	0.0142463	0.40172	0.000134637	1.60217e-05	0.0051637	2.92915e-05	0.00435693	0.000495102	9.39029e-06	9.95665e-06
H11	0.00860651	0.0266373	0.000436953	0.464358	6.72315e-05	0.0195474	3.87775e-05	0.00921004	0.000118846	0.000134637	0.398537	0.0145786	1.72985e-05	0.00151696	4.15864e-06	5.91601e-06	0.000495435	0.000811116
H12	0.00707309	0.0290345	0.000293453	0.463333	0.000165916	0.0185855	5.89756e-05	0.00627109	8.92852e-05	1.60217e-05	0.0145786	0.393386	0.000170834	0.00515722	7.38027e-06	7.21756e-06	0.00414913	0.000451482
H13	0.00381795	0.0114394	0.019212	0.000410632	0.469835	9.58528e-05	0.0289289	2.41313e-05	0.00107589	0.0051637	1.72985e-05	0.000170834	0.404113	4.94026e-05	0.00666218	0.0036289	5.40874e-06	1.94345e-06
H14	0.000563914	0.00618427	0.000456339	0.0198459	4.24027e-05	0.473148	2.03239e-05	0.0292278	0.00116864	2.92915e-05	0.00151696	0.00515722	4.94026e-05	0.413491	2.42152e-06	1.99004e-06	0.00678186	0.00366028
H15	0.000975568	0.000451424	0.00637279	2.75409e-05	0.0307515	1.66641e-05	0.482077	1.45079e-05	0.000433554	0.00435693	4.15864e-06	7.38027e-06	0.00666218	2.42152e-06	0.418195	0.0170943	1.1591e-06	6.51321e-07
H16	0.00151987	0.000200813	0.00634193	2.51009e-05	0.0305248	2.53635e-05	0.484208	3.29976e-05	0.000729822	0.000495102	5.91601e-06	7.21756e-06	0.0036289	1.99004e-06	0.0170943	0.412715	2.4587e-06	1.16937e-06
H17	0.00289959	0.00133251	0.000163911	0.00628144	4.69251e-05	0.0297846	2.13321e-05	0.479985	0.000223443	9.39029e-06	0.000495435	0.00414913	5.40874e-06	0.00678186	1.1591e-06	2.4587e-06	0.408361	0.0167604
H18	0.000307685	0.00151822	0.000127803	0.00629075	1.84747e-05	0.030408	1.16985e-05	0.484064	0.000455226	9.95665e-06	0.000811116	0.000451482	1.94345e-06	0.00366028	6.51321e-07	1.16937e-06	0.0167604	0.411936
LDM — diallyl_disufide_6_LIDI_matrix
	S1	S2	C3	C4	C5	C6	C7	C8	H9	H10	H11	H12	H13	H14	H15	H16	H17	H18
S1	14.6161	0.661951	0.526394	0.039815	0.0406007	0.0145997	0.0230123	0.0133455	0.028987	0.0267092	0.00417559	0.00887269	0.00662378	0.000518763	0.00134571	0.00155211	0.002479	0.000371027
S2	0.661951	14.6159	0.0397544	0.526241	0.0146551	0.0405302	0.0133412	0.0229884	0.00416526	0.00887191	0.0289614	0.0266947	0.000518348	0.00662186	0.00248055	0.000371138	0.00134435	0.00155161
C3	0.526394	0.0397544	4.00786	0.00234268	0.517288	0.00060892	0.0367412	0.000309908	0.46406	0.464452	0.00226219	0.000303377	0.0198692	0.000127956	0.00637391	0.00628159	0.000151	1.0787e-05
C4	0.039815	0.526241	0.00234268	4.00755	0.0006117	0.517337	0.000310106	0.0367524	0.00226123	0.00030293	0.464042	0.464339	0.000128051	0.0198437	0.000151012	1.08073e-05	0.00636507	0.00627997
C5	0.0406007	0.0146551	0.517288	0.0006117	3.96452	0.000324657	0.917019	0.000215536	0.0186835	0.0193017	0.000207254	3.84434e-05	0.473064	2.51977e-05	0.03023	0.0302483	2.8083e-05	9.53803e-06
C6	0.0145997	0.0405302	0.00060892	0.517337	0.000324657	3.96455	0.000214723	0.917048	0.000207109	3.83688e-05	0.0187281	0.0193051	2.51296e-05	0.473079	2.80432e-05	9.48013e-06	0.0302672	0.0302564
C7	0.0230123	0.0133412	0.0367412	0.000310106	0.917019	0.000214723	4.07749	0.000157274	0.00637604	0.00905617	0.00016179	3.59069e-05	0.0290035	1.82538e-05	0.481029	0.483941	1.02877e-05	7.2154e-06
C8	0.0133455	0.0229884	0.000309908	0.0367524	0.000215536	0.917048	0.000157274	4.0775	0.000161859	3.59202e-05	0.00637975	0.00905629	1.82613e-05	0.0290022	1.02897e-05	7.21685e-06	0.481037	0.483938
H9	0.028987	0.00416526	0.46406	0.00226123	0.0186835	0.000207109	0.00637604	0.000161859	0.403445	0.0150004	0.00316387	0.000235561	0.00516105	0.000104219	0.00428952	0.000465405	0.000172462	1.40183e-05
H10	0.0267092	0.00887191	0.464452	0.00030293	0.0193017	3.83688e-05	0.00905617	3.59202e-05	0.0150004	0.398997	0.000235602	9.99081e-05	0.00150485	1.76499e-05	0.000503766	0.000794003	1.28592e-05	1.97319e-06
H11	0.00417559	0.0289614	0.00226219	0.464042	0.000207254	0.0187281	0.00016179	0.00637975	0.00316387	0.000235602	0.403453	0.0150003	0.000104294	0.00516122	0.000172402	1.40138e-05	0.00429134	0.000465664
H12	0.00887269	0.0266947	0.000303377	0.464339	3.84434e-05	0.0193051	3.59069e-05	0.00905629	0.000235561	9.99081e-05	0.0150003	0.398992	1.76501e-05	0.00150483	1.28565e-05	1.97298e-06	0.000503774	0.000793985
H13	0.00662378	0.000518348	0.0198692	0.000128051	0.473064	2.51296e-05	0.0290035	1.82613e-05	0.00516105	0.00150485	0.000104294	1.76501e-05	0.41158	2.23943e-06	0.00679573	0.00364261	1.18898e-05	6.21485e-07
H14	0.000518763	0.00662186	0.000127956	0.0198437	2.51977e-05	0.473079	1.82538e-05	0.0290022	0.000104219	1.76499e-05	0.00516122	0.00150483	2.23943e-06	0.411578	1.18877e-05	6.21483e-07	0.00679576	0.00364261
H15	0.00134571	0.00248055	0.00637391	0.000151012	0.03023	2.80432e-05	0.481029	1.02897e-05	0.00428952	0.000503766	0.000172402	1.28565e-05	0.00679573	1.18877e-05	0.415708	0.0169302	2.43785e-06	4.87123e-07
H16	0.00155211	0.000371138	0.00628159	1.08073e-05	0.0302483	9.48013e-06	0.483941	7.21685e-06	0.000465405	0.000794003	1.40138e-05	1.97298e-06	0.00364261	6.21483e-07	0.0169302	0.411535	4.87222e-07	2.42685e-07
H17	0.002479	0.00134435	0.000151	0.00636507	2.8083e-05	0.0302672	1.02877e-05	0.481037	0.000172462	1.28592e-05	0.00429134	0.000503774	1.18898e-05	0.00679576	2.43785e-06	4.87222e-07	0.415712	0.0169303
H18	0.000371027	0.00155161	1.0787e-05	0.00627997	9.53803e-06	0.0302564	7.2154e-06	0.483938	1.40183e-05	1.97319e-06	0.000465664	0.000793985	6.21485e-07	0.00364261	4.87123e-07	2.42685e-07	0.0169303	0.41153
LDM — diallyl_disufide_7_LIDI_matrix
	S1	S2	C3	C4	C5	C6	C7	C8	H9	H10	H11	H12	H13	H14	H15	H16	H17	H18
S1	14.6459	0.663474	0.523657	0.03942	0.0408444	0.00806896	0.0239105	0.00185307	0.0268613	0.0282226	0.00855674	0.00642593	0.00613719	0.00825039	0.00129303	0.00155617	0.000165852	0.000359327
S2	0.663474	14.6103	0.0389938	0.528486	0.0150225	0.0395403	0.0144253	0.0227428	0.00869056	0.00359684	0.0259669	0.0301146	0.000498257	0.00204076	0.00278279	0.000397727	0.00148269	0.00111034
C3	0.523657	0.0389938	4.00916	0.00177408	0.517611	0.00361026	0.0368587	0.00104807	0.465185	0.460003	0.000410685	0.000327702	0.0199131	0.00362627	0.00620489	0.00628767	5.80463e-05	8.48014e-05
C4	0.03942	0.528486	0.00177408	4.01033	0.000706075	0.515573	0.000391966	0.0362986	0.000294581	0.000683751	0.464036	0.464941	9.13719e-05	0.0192048	0.00010576	1.08745e-05	0.0063212	0.00619982
C5	0.0408444	0.0150225	0.517611	0.000706075	3.96628	0.000296784	0.916191	0.000165608	0.0192657	0.0183546	5.90281e-05	0.000239645	0.473667	0.000316789	0.0297703	0.030316	9.54448e-06	9.41565e-06
C6	0.00806896	0.0395403	0.00361026	0.515573	0.000296784	3.96778	0.000533127	0.920238	0.000275924	0.00742212	0.0183995	0.0196153	0.000140389	0.468675	0.00136105	4.49063e-05	0.0305223	0.030345
C7	0.0239105	0.0144253	0.0368587	0.000391966	0.916191	0.000533127	4.07673	0.00057837	0.00867321	0.00634855	4.48631e-05	0.000205373	0.0290988	6.39639e-05	0.479205	0.484098	1.75096e-05	9.33169e-06
C8	0.00185307	0.0227428	0.00104807	0.0362986	0.000165608	0.920238	0.00057837	4.0843	6.78085e-05	0.00236459	0.00652745	0.0082517	0.000106717	0.0292945	0.00152196	6.32329e-05	0.484172	0.481502
H9	0.0268613	0.00869056	0.465185	0.000294581	0.0192657	0.000275924	0.00867321	6.78085e-05	0.400993	0.0146206	0.00015478	2.15127e-05	0.00163856	0.000160537	0.000488645	0.000806715	4.99159e-06	8.58969e-06
H10	0.0282226	0.00359684	0.460003	0.000683751	0.0183546	0.00742212	0.00634855	0.00236459	0.0146206	0.392485	0.000139173	6.1202e-05	0.00489909	0.0060996	0.00401353	0.000449014	0.000121385	0.000143679
H11	0.00855674	0.0259669	0.000410685	0.464036	5.90281e-05	0.0183995	4.48631e-05	0.00652745	0.00015478	0.000139173	0.400175	0.0147134	1.57233e-05	0.0049306	6.91162e-06	2.12191e-06	0.000482135	0.00404047
H12	0.00642593	0.0301146	0.000327702	0.464941	0.000239645	0.0196153	0.000205373	0.0082517	2.15127e-05	6.1202e-05	0.0147134	0.394156	8.98715e-06	0.001599	5.55667e-05	7.92229e-06	0.000818311	0.000455785
H13	0.00613719	0.000498257	0.0199131	9.13719e-05	0.473667	0.000140389	0.0290988	0.000106717	0.00163856	0.00489909	1.57233e-05	8.98715e-06	0.41312	0.000141018	0.00668132	0.00363375	5.96275e-06	4.69692e-06
H14	0.00825039	0.00204076	0.00362627	0.0192048	0.000316789	0.468675	6.39639e-05	0.0292945	0.000160537	0.0060996	0.0049306	0.001599	0.000141018	0.40749	7.09864e-05	2.95228e-06	0.0036638	0.0066725
H15	0.00129303	0.00278279	0.00620489	0.00010576	0.0297703	0.00136105	0.479205	0.00152196	0.000488645	0.00401353	6.91162e-06	5.55667e-05	0.00668132	7.09864e-05	0.408172	0.0167115	7.67085e-05	4.12181e-05
H16	0.00155617	0.000397727	0.00628767	1.08745e-05	0.030316	4.49063e-05	0.484098	6.32329e-05	0.000806715	0.000449014	2.12191e-06	7.92229e-06	0.00363375	2.95228e-06	0.0167115	0.412494	2.35287e-06	5.79652e-07
H17	0.000165852	0.00148269	5.80463e-05	0.0063212	9.54448e-06	0.0305223	1.75096e-05	0.484172	4.99159e-06	0.000121385	0.000482135	0.000818311	5.96275e-06	0.0036638	7.67085e-05	2.35287e-06	0.412078	0.0169726
H18	0.000359327	0.00111034	8.48014e-05	0.00619982	9.41565e-06	0.030345	9.33169e-06	0.481502	8.58969e-06	0.000143679	0.00404047	0.000455785	4.69692e-06	0.0066725	4.12181e-05	5.79652e-07	0.0169726	0.414488
LDM — diallyl_disufide_8_LIDI_matrix
	S1	S2	C3	C4	C5	C6	C7	C8	H9	H10	H11	H12	H13	H14	H15	H16	H17	H18
S1	14.6061	0.656084	0.53654	0.0397657	0.0332972	0.00983401	0.0198084	0.00904673	0.0268043	0.0281458	0.00850149	0.00722895	0.00838271	0.000574428	0.0210091	0.00161222	0.00031339	0.00311923
S2	0.656084	14.6339	0.03907	0.528198	0.00861311	0.0400934	0.00865671	0.0222923	0.00883655	0.00633245	0.0267009	0.0289563	0.000707594	0.00612853	0.00424913	0.000266002	0.00152621	0.00134768
C3	0.53654	0.03907	4.02285	0.00181649	0.512391	0.00474502	0.0345539	0.0040076	0.462943	0.456028	0.00046084	0.000303588	0.0205417	0.000447278	0.00442147	0.00648601	0.000125528	0.00017222
C4	0.0397657	0.528198	0.00181649	4.00972	0.000654347	0.517069	0.000453763	0.0361831	0.000248097	0.000670418	0.464397	0.463403	8.89973e-05	0.0198438	0.00040825	1.51136e-05	0.00629711	0.00627675
C5	0.0332972	0.00861311	0.512391	0.000654347	3.98847	0.000321601	0.927804	0.000426225	0.0202439	0.0191298	9.43675e-05	0.000168031	0.474288	3.81149e-05	0.029303	0.0314492	1.83514e-05	4.83948e-05
C6	0.00983401	0.0400934	0.00474502	0.517069	0.000321601	3.96663	0.000298869	0.912319	0.000290453	0.00981508	0.0195364	0.0185592	1.83096e-05	0.473065	7.46894e-05	3.08567e-05	0.0304377	0.029718
C7	0.0198084	0.00865671	0.0345539	0.000453763	0.927804	0.000298869	4.07842	0.000257939	0.0109117	0.00896433	3.71325e-05	0.000131665	0.030184	2.50056e-05	0.472233	0.484212	9.87155e-06	2.11487e-05
C8	0.00904673	0.0222923	0.0040076	0.0361831	0.000426225	0.912319	0.000257939	4.08173	0.00019154	0.00808861	0.00911792	0.00626071	9.5811e-06	0.0292167	8.41129e-05	3.8935e-05	0.48424	0.480006
H9	0.0268043	0.00883655	0.462943	0.000248097	0.0202439	0.000290453	0.0109117	0.00019154	0.397728	0.0148132	0.000124554	2.00653e-05	0.00104177	2.98405e-05	0.000466817	0.000720272	1.20957e-05	1.30385e-05
H10	0.0281458	0.00633245	0.456028	0.000670418	0.0191298	0.00981508	0.00896433	0.00808861	0.0148132	0.37801	0.000117106	9.7191e-05	0.00156657	0.00116358	0.000479614	0.000672244	0.000422938	0.000209927
H11	0.00850149	0.0267009	0.00046084	0.464397	9.43675e-05	0.0195364	3.71325e-05	0.00911792	0.000124554	0.000117106	0.398708	0.014596	1.83644e-05	0.00154071	3.49794e-05	1.19455e-06	0.000812856	0.000494208
H12	0.00722895	0.0289563	0.000303588	0.463403	0.000168031	0.0185592	0.000131665	0.00626071	2.00653e-05	9.7191e-05	0.014596	0.393805	2.22973e-05	0.00514332	6.35817e-05	5.12434e-06	0.000449376	0.00411803
H13	0.00838271	0.000707594	0.0205417	8.89973e-05	0.474288	1.83096e-05	0.030184	9.5811e-06	0.00104177	0.00156657	1.83644e-05	2.22973e-05	0.420277	4.5998e-06	0.00667743	0.00399966	6.35395e-07	5.08835e-06
H14	0.000574428	0.00612853	0.000447278	0.0198438	3.81149e-05	0.473065	2.50056e-05	0.0292167	2.98405e-05	0.00116358	0.00154071	0.00514332	4.5998e-06	0.413106	5.11986e-06	1.49859e-06	0.00366372	0.00677952
H15	0.0210091	0.00424913	0.00442147	0.00040825	0.029303	7.46894e-05	0.472233	8.41129e-05	0.000466817	0.000479614	3.49794e-05	6.35817e-05	0.00667743	5.11986e-06	0.390549	0.0159201	3.77915e-06	1.45048e-05
H16	0.00161222	0.000266002	0.00648601	1.51136e-05	0.0314492	3.08567e-05	0.484212	3.8935e-05	0.000720272	0.000672244	1.19455e-06	5.12434e-06	0.00399966	1.49859e-06	0.0159201	0.414391	1.15294e-06	1.9274e-06
H17	0.00031339	0.00152621	0.000125528	0.00629711	1.83514e-05	0.0304377	9.87155e-06	0.48424	1.20957e-05	0.000422938	0.000812856	0.000449376	6.35395e-07	0.00366372	3.77915e-06	1.15294e-06	0.412862	0.0167946
H18	0.00311923	0.00134768	0.00017222	0.00627675	4.83948e-05	0.029718	2.11487e-05	0.480006	1.30385e-05	0.000209927	0.000494208	0.00411803	5.08835e-06	0.00677952	1.45048e-05	1.9274e-06	0.0167946	0.408425
LDM — diallyl_disufide_9_LIDI_matrix
	S1	S2	C3	C4	C5	C6	C7	C8	H9	H10	H11	H12	H13	H14	H15	H16	H17	H18
S1	14.6119	0.66144	0.525469	0.0395641	0.0424836	0.0147486	0.0208832	0.0135755	0.0294092	0.028281	0.00386954	0.00877356	0.00605675	0.000508659	0.00108755	0.00126074	0.000374068	0.0023716
S2	0.66144	14.645	0.0403454	0.526013	0.00910184	0.0407998	0.00512933	0.0233221	0.00251905	0.0116973	0.0291958	0.0267242	0.000338828	0.00653753	0.000501056	0.000239606	0.0015538	0.00133916
C3	0.525469	0.0403454	4.00918	0.00219393	0.515794	0.000631344	0.0374138	0.00034171	0.466101	0.462641	0.00201069	0.000259893	0.0195734	0.000123055	0.00635377	0.00634993	1.18006e-05	0.000193771
C4	0.0395641	0.526013	0.00219393	4.00847	0.000525369	0.517503	0.000238403	0.0368082	0.00173914	0.000328467	0.46447	0.46458	0.000140371	0.0198457	1.72564e-05	2.11554e-05	0.0062795	0.00636837
C5	0.0424836	0.00910184	0.515794	0.000525369	3.97659	9.11569e-05	0.921002	6.54605e-05	0.0187935	0.0187866	0.000284326	0.000150906	0.473068	2.07927e-05	0.0301822	0.0303462	3.0963e-06	3.10958e-05
C6	0.0147486	0.0407998	0.000631344	0.517503	9.11569e-05	3.96458	5.70233e-05	0.916853	0.000205059	0.000216354	0.01871	0.0192644	1.36896e-05	0.473128	4.25487e-06	8.22263e-06	0.0302209	0.0302624
C7	0.0208832	0.00512933	0.0374138	0.000238403	0.921002	5.70233e-05	4.0817	3.61347e-05	0.00656887	0.00915733	7.48062e-05	0.000120147	0.0293112	1.11279e-05	0.483609	0.481167	1.22039e-06	2.58173e-05
C8	0.0135755	0.0233221	0.00034171	0.0368082	6.54605e-05	0.916853	3.61347e-05	4.07648	0.000230756	0.000158326	0.00636489	0.00898522	1.41955e-05	0.0290108	3.00014e-06	1.80358e-05	0.48385	0.48099
H9	0.0294092	0.00251905	0.466101	0.00173914	0.0187935	0.000205059	0.00656887	0.000230756	0.408105	0.0151536	0.00236992	0.000163427	0.00509959	9.19764e-05	0.000483135	0.00420697	2.15122e-05	0.000256544
H10	0.028281	0.0116973	0.462641	0.000328467	0.0187866	0.000216354	0.00915733	0.000158326	0.0151536	0.389548	9.25831e-05	2.19164e-05	0.00163331	1.58659e-05	0.000800758	0.000536655	7.19998e-06	1.77417e-05
H11	0.00386954	0.0291958	0.00201069	0.46447	0.000284326	0.01871	7.48062e-05	0.00636489	0.00236992	9.25831e-05	0.402544	0.0149707	8.38393e-05	0.00515831	9.13065e-06	1.4517e-05	0.000463269	0.00425179
H12	0.00877356	0.0267242	0.000259893	0.46458	0.000150906	0.0192644	0.000120147	0.00898522	0.000163427	2.19164e-05	0.0149707	0.399039	2.97019e-05	0.00153606	6.55566e-06	5.9029e-06	0.000796842	0.000504777
H13	0.00605675	0.000338828	0.0195734	0.000140371	0.473068	1.36896e-05	0.0293112	1.41955e-05	0.00509959	0.00163331	8.38393e-05	2.97019e-05	0.408318	1.66695e-06	0.00363059	0.00678352	5.19544e-07	1.74163e-05
H14	0.000508659	0.00653753	0.000123055	0.0198457	2.07927e-05	0.473128	1.11279e-05	0.0290108	9.19764e-05	1.58659e-05	0.00515831	0.00153606	1.66695e-06	0.411602	1.50744e-06	2.30414e-06	0.0036385	0.0067943
H15	0.00108755	0.000501056	0.00635377	1.72564e-05	0.0301822	4.25487e-06	0.483609	3.00014e-06	0.000483135	0.000800758	9.13065e-06	6.55566e-06	0.00363059	1.50744e-06	0.409412	0.0168539	1.2053e-07	3.69724e-06
H16	0.00126074	0.000239606	0.00634993	2.11554e-05	0.0303462	8.22263e-06	0.481167	1.80358e-05	0.00420697	0.000536655	1.4517e-05	5.9029e-06	0.00678352	2.30414e-06	0.0168539	0.413539	1.67529e-06	3.07484e-05
H17	0.000374068	0.0015538	1.18006e-05	0.0062795	3.0963e-06	0.0302209	1.22039e-06	0.48385	2.15122e-05	7.19998e-06	0.000463269	0.000796842	5.19544e-07	0.0036385	1.2053e-07	1.67529e-06	0.411143	0.0169162
H18	0.0023716	0.00133916	0.000193771	0.00636837	3.10958e-05	0.0302624	2.58173e-05	0.48099	0.000256544	1.77417e-05	0.00425179	0.000504777	1.74163e-05	0.0067943	3.69724e-06	3.07484e-05	0.0169162	0.415869
LDM — diallyl_disufide_10_LIDI_matrix
	S1	S2	C3	C4	C5	C6	C7	C8	H9	H10	H11	H12	H13	H14	H15	H16	H17	H18
S1	14.6459	0.66009	0.526056	0.0403641	0.0409002	0.00948282	0.0233299	0.00525584	0.0266185	0.0290142	0.00476885	0.00761266	0.00648733	0.000515915	0.0015561	0.00136184	0.000494953	0.000254081
S2	0.66009	14.6124	0.0397488	0.525221	0.0144685	0.0423226	0.0136255	0.0207274	0.0088391	0.00433526	0.0293262	0.0283291	0.000502615	0.00595716	0.000381456	0.00274053	0.00109105	0.00126099
C3	0.526056	0.0397488	4.00755	0.00228131	0.517368	0.000427558	0.036767	0.000230712	0.464442	0.463918	0.000375243	0.00241572	0.0198523	7.2665e-05	0.0062788	0.00637928	1.9414e-05	1.93071e-05
C4	0.0403641	0.525221	0.00228131	4.00621	0.000675973	0.51559	0.000353814	0.0372722	0.000270416	0.00224073	0.465411	0.463592	0.000125467	0.0196839	1.18058e-05	0.000119875	0.00633903	0.00632157
C5	0.0409002	0.0144685	0.517368	0.000675973	3.96464	7.01008e-05	0.916787	2.68252e-05	0.0192592	0.0186482	0.00022092	0.000213278	0.473141	3.2267e-05	0.0302259	0.0301888	3.22822e-06	3.56225e-06
C6	0.00948282	0.0423226	0.000427558	0.51559	7.01008e-05	3.97775	7.01196e-05	0.921093	0.000121566	0.000233604	0.0183201	0.0193623	2.06414e-05	0.473636	3.19402e-06	7.27326e-05	0.0302458	0.0301988
C7	0.0233299	0.0136255	0.036767	0.000353814	0.916787	7.01196e-05	4.07685	1.56372e-05	0.00895983	0.00637538	0.000168289	0.000109865	0.0290127	9.50321e-05	0.483876	0.480959	2.32887e-06	4.67851e-06
C8	0.00525584	0.0207274	0.000230712	0.0372722	2.68252e-05	0.921093	1.56372e-05	4.08079	9.80575e-05	0.00017318	0.0063905	0.00918385	1.30444e-05	0.0295054	1.04237e-06	1.21672e-05	0.483621	0.480776
H9	0.0266185	0.0088391	0.464442	0.000270416	0.0192592	0.000121566	0.00895983	9.80575e-05	0.398843	0.0149662	2.70338e-05	0.000249765	0.00152996	5.48336e-06	0.00079603	0.000502403	5.59232e-06	3.9381e-06
H10	0.0290142	0.00433526	0.463918	0.00224073	0.0186482	0.000233604	0.00637538	0.00017318	0.0149662	0.403076	0.000138341	0.00330042	0.00514679	1.65333e-05	0.000465206	0.00428337	2.22032e-05	9.35244e-06
H11	0.00476885	0.0293262	0.000375243	0.465411	0.00022092	0.0183201	0.000168289	0.0063905	2.70338e-05	0.000138341	0.398686	0.0151213	9.89629e-06	0.00509535	5.09731e-06	2.35625e-05	0.000464346	0.00403141
H12	0.00761266	0.0283291	0.00241572	0.463592	0.000213278	0.0193623	0.000109865	0.00918385	0.000249765	0.00330042	0.0151213	0.399922	0.000110428	0.00167746	7.68966e-06	9.61584e-05	0.000814969	0.000537161
H13	0.00648733	0.000502615	0.0198523	0.000125467	0.473141	2.06414e-05	0.0290127	1.30444e-05	0.00152996	0.00514679	9.89629e-06	0.000110428	0.411559	8.32585e-06	0.00363838	0.00679432	1.66107e-06	7.40947e-07
H14	0.000515915	0.00595716	7.2665e-05	0.0196839	3.2267e-05	0.473636	9.50321e-05	0.0295054	5.48336e-06	1.65333e-05	0.00509535	0.00167746	8.32585e-06	0.411419	6.60529e-06	0.000110629	0.00366021	0.00678274
H15	0.0015561	0.000381456	0.0062788	1.18058e-05	0.0302259	3.19402e-06	0.483876	1.04237e-06	0.00079603	0.000465206	5.09731e-06	7.68966e-06	0.00363838	6.60529e-06	0.411215	0.0169174	1.17198e-07	1.61365e-07
H16	0.00136184	0.00274053	0.00637928	0.000119875	0.0301888	7.27326e-05	0.480959	1.21672e-05	0.000502403	0.00428337	2.35625e-05	9.61584e-05	0.00679432	0.000110629	0.0169174	0.415705	2.92919e-06	7.98943e-06
H17	0.000494953	0.00109105	1.9414e-05	0.00633903	3.22822e-06	0.0302458	2.32887e-06	0.483621	5.59232e-06	2.22032e-05	0.000464346	0.000814969	1.66107e-06	0.00366021	1.17198e-07	2.92919e-06	0.409783	0.0167826
H18	0.000254081	0.00126099	1.93071e-05	0.00632157	3.56225e-06	0.0301988	4.67851e-06	0.480776	3.9381e-06	9.35244e-06	0.00403141	0.000537161	7.40947e-07	0.00678274	1.61365e-07	7.98943e-06	0.0167826	0.41083
LDM — diallyl_disufide_11_LIDI_matrix
	S1	S2	C3	C4	C5	C6	C7	C8	H9	H10	H11	H12	H13	H14	H15	H16	H17	H18
S1	14.6108	0.660302	0.528984	0.0398515	0.0418782	0.0143208	0.0208983	0.0134809	0.0255785	0.0297435	0.00891388	0.00427293	0.00390146	0.000498595	0.000968606	0.00151603	0.00272747	0.000380453
S2	0.660302	14.6362	0.0396821	0.525695	0.00854323	0.0408171	0.00182591	0.0231966	0.00865787	0.00632169	0.0266766	0.0289811	0.0116205	0.00652232	0.000457583	0.000211597	0.00134618	0.00154573
C3	0.528984	0.0396821	4.00868	0.00233956	0.515445	0.000604226	0.0370445	0.000315024	0.46426	0.463337	0.000298949	0.00233343	0.0191987	0.000125482	0.0063864	0.00633515	0.000135588	1.06339e-05
C4	0.0398515	0.525695	0.00233956	4.0083	0.000519854	0.517469	0.000194735	0.0368044	0.000267372	0.00251442	0.464432	0.463888	0.000320011	0.0198614	2.55495e-05	2.62196e-05	0.00636254	0.00627954
C5	0.0418782	0.00854323	0.515445	0.000519854	3.97226	0.000248715	0.924019	0.000182072	0.0182797	0.0195042	4.96827e-05	0.000176121	0.469572	1.37039e-05	0.0307537	0.0304889	2.72179e-05	6.20044e-06
C6	0.0143208	0.0408171	0.000604226	0.517469	0.000248715	3.96517	0.000125785	0.916956	3.34378e-05	0.000217743	0.0192418	0.0186566	0.000167153	0.473106	1.0281e-05	1.23955e-05	0.0302032	0.0302227
C7	0.0208983	0.00182591	0.0370445	0.000194735	0.924019	0.000125785	4.08413	7.09469e-05	0.00653045	0.00944699	3.34207e-05	0.000167197	0.0287676	9.89276e-06	0.482033	0.484073	2.21245e-05	2.52633e-06
C8	0.0134809	0.0231966	0.000315024	0.0368044	0.000182072	0.916956	7.09469e-05	4.07697	3.42172e-05	0.000134268	0.00895978	0.00636073	0.000135223	0.0289974	7.56564e-06	8.06661e-06	0.480878	0.483854
H9	0.0255785	0.00865787	0.46426	0.000267372	0.0182797	3.34378e-05	0.00653045	3.42172e-05	0.400244	0.0148685	8.3946e-05	0.00022589	0.00513092	1.76369e-05	0.00435956	0.000493469	1.27005e-05	1.87702e-06
H10	0.0297435	0.00632169	0.463337	0.00251442	0.0195042	0.000217743	0.00944699	0.000134268	0.0148685	0.399214	0.000266305	0.00346425	0.0010853	0.000113599	0.000455563	0.000772963	0.000135724	1.06975e-05
H11	0.00891388	0.0266766	0.000298949	0.464432	4.96827e-05	0.0192418	3.34207e-05	0.00895978	8.3946e-05	0.000266305	0.398611	0.014954	1.22901e-05	0.00152865	2.41105e-06	2.52542e-06	0.000501028	0.000795239
H12	0.00427293	0.0289811	0.00233343	0.463888	0.000176121	0.0186566	0.000167197	0.00636073	0.00022589	0.00346425	0.014954	0.402448	3.33713e-05	0.00513535	9.84656e-06	1.69139e-05	0.0042512	0.000462153
H13	0.00390146	0.0116205	0.0191987	0.000320011	0.469572	0.000167153	0.0287676	0.000135223	0.00513092	0.0010853	1.22901e-05	3.33713e-05	0.402327	1.20142e-05	0.00663786	0.00361268	6.44953e-06	8.90875e-06
H14	0.000498595	0.00652232	0.000125482	0.0198614	1.37039e-05	0.473106	9.89276e-06	0.0289974	1.76369e-05	0.000113599	0.00152865	0.00513535	1.20142e-05	0.41142	1.19047e-06	1.01612e-06	0.00678428	0.00363848
H15	0.000968606	0.000457583	0.0063864	2.55495e-05	0.0307537	1.0281e-05	0.482033	7.56564e-06	0.00435956	0.000455563	2.41105e-06	9.84656e-06	0.00663786	1.19047e-06	0.417915	0.017059	1.23677e-06	4.51943e-07
H16	0.00151603	0.000211597	0.00633515	2.62196e-05	0.0304889	1.23955e-05	0.484073	8.06661e-06	0.000493469	0.000772963	2.52542e-06	1.69139e-05	0.00361268	1.01612e-06	0.017059	0.411966	1.73111e-06	2.97189e-07
H17	0.00272747	0.00134618	0.000135588	0.00636254	2.72179e-05	0.0302032	2.21245e-05	0.480878	1.27005e-05	0.000135724	0.000501028	0.0042512	6.44953e-06	0.00678428	1.23677e-06	1.73111e-06	0.414875	0.0168895
H18	0.000380453	0.00154573	1.06339e-05	0.00627954	6.20044e-06	0.0302227	2.52633e-06	0.483854	1.87702e-06	1.06975e-05	0.000795239	0.000462153	8.90875e-06	0.00363848	4.51943e-07	2.97189e-07	0.0168895	0.41107
LDM — diallyl_disufide_12_LIDI_matrix
	S1	S2	C3	C4	C5	C6	C7	C8	H9	H10	H11	H12	H13	H14	H15	H16	H17	H18
S1	14.6457	0.661875	0.528547	0.0381949	0.038582	0.00725663	0.0220507	0.00176969	0.0305678	0.0267081	0.00822841	0.00649972	0.00219656	0.00775758	0.00150058	0.00103289	0.000185898	0.000350247
S2	0.661875	14.6456	0.0381895	0.528663	0.00726025	0.0385711	0.00176964	0.0220512	0.00649942	0.0082287	0.026708	0.0305643	0.00776006	0.00219464	0.000185903	0.000350293	0.00150065	0.00103282
C3	0.528547	0.0381895	4.00989	0.00217374	0.517019	0.00078389	0.037018	0.000238655	0.464209	0.463543	0.000572302	0.000388041	0.0187067	0.000603644	0.00635076	0.00632407	2.59953e-05	2.97068e-05
C4	0.0381949	0.528663	0.00217374	4.00978	0.000793344	0.517037	0.000240531	0.0370613	0.000388306	0.000572651	0.463498	0.464181	0.000614181	0.0186989	2.60891e-05	3.00232e-05	0.00635152	0.00632213
C5	0.038582	0.00726025	0.517019	0.000793344	3.96993	0.00852621	0.918081	0.00254496	0.0194953	0.0183445	0.000183004	7.152e-05	0.46378	0.00962097	0.0304365	0.0304642	0.000172373	0.000164131
C6	0.00725663	0.0385711	0.00078389	0.517037	0.00852621	3.96991	0.00254572	0.918044	7.15566e-05	0.000182988	0.0183339	0.0194949	0.00961987	0.463787	0.00017245	0.000164108	0.0304352	0.0304504
C7	0.0220507	0.00176964	0.037018	0.000240531	0.918081	0.00254572	4.08622	0.000890971	0.0087754	0.00653398	8.39179e-05	3.30884e-05	0.0279619	0.00536278	0.48412	0.481794	0.000177069	8.58338e-05
C8	0.00176969	0.0220512	0.000238655	0.0370613	0.00254496	0.918044	0.000890971	4.08622	3.30888e-05	8.38905e-05	0.00654148	0.00877585	0.00536196	0.0279589	0.000176997	8.58156e-05	0.48411	0.481808
H9	0.0305678	0.00649942	0.464209	0.000388306	0.0194953	7.15566e-05	0.0087754	3.30888e-05	0.39291	0.0147237	2.88716e-05	0.00016876	0.00140045	0.000120346	0.000815091	0.000461029	3.8854e-06	4.07824e-06
H10	0.0267081	0.0082287	0.463543	0.000572651	0.0183445	0.000182988	0.00653398	8.38905e-05	0.0147237	0.399314	0.000233059	2.88736e-05	0.00488619	5.3686e-05	0.000486142	0.00418914	7.89575e-06	7.62602e-06
H11	0.00822841	0.026708	0.000572302	0.463498	0.000183004	0.0183339	8.39179e-05	0.00654148	2.88716e-05	0.000233059	0.399309	0.0147235	5.36577e-05	0.00488615	7.89561e-06	7.62615e-06	0.00048612	0.00418893
H12	0.00649972	0.0305643	0.000388041	0.464181	7.152e-05	0.0194949	3.30884e-05	0.00877585	0.00016876	2.88736e-05	0.0147235	0.392908	0.000120354	0.00140039	3.88515e-06	4.07842e-06	0.000815073	0.000461044
H13	0.00219656	0.00776006	0.0187067	0.000614181	0.46378	0.00961987	0.0279619	0.00536196	0.00140045	0.00488619	5.36577e-05	0.000120354	0.390192	0.00291842	0.00356768	0.00650916	0.000315706	0.000147692
H14	0.00775758	0.00219464	0.000603644	0.0186989	0.00962097	0.463787	0.00536278	0.0279589	0.000120346	5.3686e-05	0.00488615	0.00140039	0.00291842	0.390193	0.000315759	0.000147668	0.00356787	0.00650909
H15	0.00150058	0.000185903	0.00635076	2.60891e-05	0.0304365	0.00017245	0.48412	0.000176997	0.000815091	0.000486142	7.89561e-06	3.88515e-06	0.00356768	0.000315759	0.412524	0.0170613	0.000145604	1.48458e-05
H16	0.00103289	0.000350293	0.00632407	3.00232e-05	0.0304642	0.000164108	0.481794	8.58156e-05	0.000461029	0.00418914	7.62615e-06	4.07842e-06	0.00650916	0.000147668	0.0170613	0.416323	1.48466e-05	4.57506e-06
H17	0.000185898	0.00150065	2.59953e-05	0.00635152	0.000172373	0.0304352	0.000177069	0.48411	3.8854e-06	7.89575e-06	0.00048612	0.000815073	0.000315706	0.00356787	0.000145604	1.48466e-05	0.412526	0.0170614
H18	0.000350247	0.00103282	2.97068e-05	0.00632213	0.000164131	0.0304504	8.58338e-05	0.481808	4.07824e-06	7.62602e-06	0.00418893	0.000461044	0.000147692	0.00650909	1.48458e-05	4.57506e-06	0.0170614	0.416318
LDM — diallyl_disufide_13_LIDI_matrix
	S1	S2	C3	C4	C5	C6	C7	C8	H9	H10	H11	H12	H13	H14	H15	H16	H17	H18
S1	14.6435	0.660788	0.528758	0.0393944	0.0393401	0.00917275	0.022358	0.00529584	0.0257931	0.0305184	0.00344106	0.00876723	0.00218946	0.000441993	0.00105149	0.00149828	0.000250935	0.000497843
S2	0.660788	14.6396	0.0392749	0.523003	0.00921129	0.043255	0.00191107	0.0213967	0.00854273	0.00610626	0.0297755	0.0267648	0.0102269	0.00607717	0.000404126	0.000177694	0.00129823	0.00110747
C3	0.528758	0.0392749	4.01018	0.00175974	0.515809	0.000397004	0.0364425	0.000177437	0.464133	0.464672	0.000386509	0.000686	0.019188	0.00011316	0.00620228	0.00632412	1.70176e-05	1.52728e-05
C4	0.0393944	0.523003	0.00175974	4.01171	0.00388226	0.516605	0.00119554	0.037332	0.000374271	0.000375031	0.465984	0.458186	0.00308904	0.0196872	8.48837e-05	5.76785e-05	0.00631988	0.00633986
C5	0.0393401	0.00921129	0.515809	0.00388226	3.96917	0.000326443	0.920599	0.000215119	0.0183276	0.0196523	0.000221877	0.00791854	0.468299	0.000287836	0.0303673	0.0305027	1.75706e-05	2.556e-05
C6	0.00917275	0.043255	0.000397004	0.516605	0.000326443	3.97694	8.60551e-05	0.92028	0.000139682	4.27132e-05	0.0185633	0.0185918	0.000527297	0.473506	1.1444e-05	7.31239e-06	0.0301706	0.0302058
C7	0.022358	0.00191107	0.0364425	0.00119554	0.920599	8.60551e-05	4.08314	0.000124363	0.00643167	0.00857797	0.000128152	0.0030797	0.0292283	4.48311e-05	0.481477	0.48402	8.9272e-06	1.0383e-05
C8	0.00529584	0.0213967	0.000177437	0.037332	0.000215119	0.92028	0.000124363	4.08167	9.92216e-05	9.52083e-06	0.00641778	0.00901935	0.000107724	0.0295037	8.28284e-06	6.0814e-06	0.480793	0.483683
H9	0.0257931	0.00854273	0.464133	0.000374271	0.0183276	0.000139682	0.00643167	9.92216e-05	0.400075	0.0147077	6.17087e-05	0.000121934	0.00500131	2.85452e-05	0.00406558	0.000481588	4.87929e-06	8.52419e-06
H10	0.0305184	0.00610626	0.464672	0.000375031	0.0196523	4.27132e-05	0.00857797	9.52083e-06	0.0147077	0.39394	0.000130614	0.000115699	0.00149633	1.04872e-05	0.000457464	0.000811084	1.71818e-06	1.7623e-06
H11	0.00344106	0.0297755	0.000386509	0.465984	0.000221877	0.0185633	0.000128152	0.00641778	6.17087e-05	0.000130614	0.399934	0.0145642	0.000280987	0.00514899	8.74139e-06	5.34404e-06	0.00405529	0.000465308
H12	0.00876723	0.0267648	0.000686	0.458186	0.00791854	0.0185918	0.0030797	0.00901935	0.000121934	0.000115699	0.0145642	0.382407	0.00422451	0.00163317	0.000126276	0.000130052	0.000514123	0.000781212
H13	0.00218946	0.0102269	0.019188	0.00308904	0.468299	0.000527297	0.0292283	0.000107724	0.00500131	0.00149633	0.000280987	0.00422451	0.406357	0.000621174	0.00664709	0.00365681	3.98737e-05	1.54778e-05
H14	0.000441993	0.00607717	0.00011316	0.0196872	0.000287836	0.473506	4.48311e-05	0.0295037	2.85452e-05	1.04872e-05	0.00514899	0.00163317	0.000621174	0.412809	2.02378e-05	5.62617e-06	0.00678443	0.0036538
H15	0.00105149	0.000404126	0.00620228	8.48837e-05	0.0303673	1.1444e-05	0.481477	8.28284e-06	0.00406558	0.000457464	8.74139e-06	0.000126276	0.00664709	2.02378e-05	0.414473	0.0169512	9.98988e-07	1.06809e-06
H16	0.00149828	0.000177694	0.00632412	5.76785e-05	0.0305027	7.31239e-06	0.48402	6.0814e-06	0.000481588	0.000811084	5.34404e-06	0.000130052	0.00365681	5.62617e-06	0.0169512	0.411598	6.68066e-07	7.19635e-07
H17	0.000250935	0.00129823	1.70176e-05	0.00631988	1.75706e-05	0.0301706	8.9272e-06	0.480793	4.87929e-06	1.71818e-06	0.00405529	0.000514123	3.98737e-05	0.00678443	9.98988e-07	6.68066e-07	0.410728	0.0167832
H18	0.000497843	0.00110747	1.52728e-05	0.00633986	2.556e-05	0.0302058	1.0383e-05	0.483683	8.52419e-06	1.7623e-06	0.000465308	0.000781212	1.54778e-05	0.0036538	1.06809e-06	7.19635e-07	0.0167832	0.409836
LDM — diallyl_disufide_14_LIDI_matrix
	S1	S2	C3	C4	C5	C6	C7	C8	H9	H10	H11	H12	H13	H14	H15	H16	H17	H18
S1	14.6408	0.661833	0.528928	0.039433	0.0401429	0.00880326	0.0228551	0.0049626	0.0304663	0.0259734	0.0114206	0.00229143	0.00222022	0.000337759	0.00108412	0.00150239	0.00048847	0.000230107
S2	0.661833	14.6395	0.039153	0.524081	0.00817017	0.0428331	0.00186065	0.0209086	0.0063714	0.00849142	0.0283154	0.0285991	0.00835472	0.00632402	0.000367189	0.000168773	0.00109961	0.00123952
C3	0.528928	0.039153	4.0106	0.0017148	0.515887	0.000540565	0.03655	0.000294726	0.464635	0.463976	0.000373178	0.000583726	0.0192359	0.000109531	0.00622928	0.00632252	2.19233e-05	2.33188e-05
C4	0.039433	0.524081	0.0017148	4.00929	0.00333267	0.51623	0.000915994	0.0375175	0.000354251	0.000362603	0.462043	0.462301	0.00379507	0.019548	7.90527e-05	5.39169e-05	0.00635013	0.00637412
C5	0.0401429	0.00817017	0.515887	0.00333267	3.96793	0.000370431	0.921413	8.23326e-05	0.0195728	0.0183285	0.000254818	0.00595272	0.468593	0.000118888	0.0304295	0.0305108	1.01454e-05	3.50421e-05
C6	0.00880326	0.0428331	0.000540565	0.51623	0.000370431	3.97719	0.000108967	0.920861	4.74959e-05	0.000223558	0.0187353	0.0182773	0.000313262	0.472966	1.30125e-05	6.96686e-06	0.0301657	0.0303701
C7	0.0228551	0.00186065	0.03655	0.000915994	0.921413	0.000108967	4.08281	1.66747e-05	0.00848514	0.00649264	8.94333e-05	0.00171945	0.0293721	4.0908e-05	0.481561	0.484116	2.55105e-06	9.3107e-06
C8	0.0049626	0.0209086	0.000294726	0.0375175	8.23326e-05	0.920861	1.66747e-05	4.08208	2.67218e-05	0.000168384	0.00927791	0.00648037	7.69092e-05	0.0292841	4.59661e-06	1.34453e-06	0.483596	0.481198
H9	0.0304663	0.0063714	0.464635	0.000354251	0.0195728	4.74959e-05	0.00848514	2.67218e-05	0.393533	0.0146897	0.000199818	6.30775e-05	0.00151849	5.95995e-06	0.000458568	0.000810181	2.58398e-06	2.28761e-06
H10	0.0259734	0.00849142	0.463976	0.000362603	0.0183285	0.000223558	0.00649264	0.000168384	0.0146897	0.399967	1.88202e-05	0.00012083	0.00495256	2.34071e-05	0.00408998	0.000483143	1.13296e-05	9.49443e-06
H11	0.0114206	0.0283154	0.000373178	0.462043	0.000254818	0.0187353	8.94333e-05	0.00927791	0.000199818	1.88202e-05	0.387436	0.014849	0.000184242	0.0015991	5.10284e-06	4.54242e-06	0.000802259	0.000537486
H12	0.00229143	0.0285991	0.000583726	0.462301	0.00595272	0.0182773	0.00171945	0.00648037	6.30775e-05	0.00012083	0.014849	0.399986	0.00615191	0.00493471	0.000136735	9.84111e-05	0.000472169	0.00415397
H13	0.00222022	0.00835472	0.0192359	0.00379507	0.468593	0.000313262	0.0293721	7.69092e-05	0.00151849	0.00495256	0.000184242	0.00615191	0.407545	0.000148569	0.00665995	0.00366516	6.05712e-06	6.7686e-05
H14	0.000337759	0.00632402	0.000109531	0.019548	0.000118888	0.472966	4.0908e-05	0.0292841	5.95995e-06	2.34071e-05	0.0015991	0.00493471	0.000148569	0.408138	3.98115e-06	3.33579e-06	0.00363118	0.00678148
H15	0.00108412	0.000367189	0.00622928	7.90527e-05	0.0304295	1.30125e-05	0.481561	4.59661e-06	0.000458568	0.00408998	5.10284e-06	0.000136735	0.00665995	3.98115e-06	0.414851	0.0169695	5.35714e-07	2.3337e-06
H16	0.00150239	0.000168773	0.00632252	5.39169e-05	0.0305108	6.96686e-06	0.484116	1.34453e-06	0.000810181	0.000483143	4.54242e-06	9.84111e-05	0.00366516	3.33579e-06	0.0169695	0.412059	2.56293e-07	1.0578e-06
H17	0.00048847	0.00109961	2.19233e-05	0.00635013	1.01454e-05	0.0301657	2.55105e-06	0.483596	2.58398e-06	1.13296e-05	0.000802259	0.000472169	6.05712e-06	0.00363118	5.35714e-07	2.56293e-07	0.409408	0.0168554
H18	0.000230107	0.00123952	2.33188e-05	0.00637412	3.50421e-05	0.0303701	9.3107e-06	0.481198	2.28761e-06	9.49443e-06	0.000537486	0.00415397	6.7686e-05	0.00678148	2.3337e-06	1.0578e-06	0.0168554	0.413539
LDM — diallyl_disufide_15_LIDI_matrix
	S1	S2	C3	C4	C5	C6	C7	C8	H9	H10	H11	H12	H13	H14	H15	H16	H17	H18
S1	14.6411	0.661081	0.526558	0.0395062	0.0401888	0.00777783	0.023059	0.00240993	0.0263585	0.0292685	0.0123454	0.00254684	0.00552879	0.00166796	0.00131712	0.00149486	0.0015867	0.0002311
S2	0.661081	14.6099	0.0406629	0.528734	0.0107345	0.0312552	0.00975315	0.0220825	0.00863075	0.00723395	0.0254464	0.0303495	0.000608449	0.00688642	0.0033735	0.000347238	0.0214741	0.00163604
C3	0.526558	0.0406629	4.01005	0.00177743	0.517274	0.000342442	0.036018	0.00020656	0.465283	0.463489	0.00075823	0.000417299	0.0199686	5.52829e-05	0.0062029	0.0062648	0.000192156	2.21912e-05
C4	0.0395062	0.528734	0.00177743	4.02268	0.00558101	0.514486	0.00449412	0.0347342	0.00040748	0.00033836	0.452598	0.467409	0.00060015	0.0203419	0.000244335	0.000152685	0.00435142	0.00648974
C5	0.0401888	0.0107345	0.517274	0.00558101	3.96828	0.00159337	0.909381	0.00145743	0.0193593	0.0185396	0.00960309	0.000343711	0.473556	5.13996e-05	0.0293731	0.0300976	0.000317387	2.68759e-05
C6	0.00777783	0.0312552	0.000342442	0.514486	0.00159337	3.98512	0.00405947	0.923777	0.000148895	3.19214e-05	0.0192298	0.0203829	9.75196e-05	0.47385	0.000576061	0.000613715	0.0292499	0.0311995
C7	0.023059	0.00975315	0.036018	0.00449412	0.909381	0.00405947	4.07047	0.00535929	0.00853678	0.00622421	0.00597746	0.000516247	0.0293229	8.79293e-05	0.478291	0.483112	0.00158095	0.000117305
C8	0.00240993	0.0220825	0.00020656	0.0347342	0.00145743	0.923777	0.00535929	4.08227	6.15243e-05	3.93826e-05	0.0122432	0.00819127	0.000137463	0.0299573	0.00183538	0.000683978	0.472794	0.48415
H9	0.0263585	0.00863075	0.465283	0.00040748	0.0193593	0.000148895	0.00853678	6.15243e-05	0.400149	0.0146265	9.03815e-05	9.03626e-05	0.00168467	2.34495e-05	0.00048021	0.000812437	2.31248e-05	2.64059e-06
H10	0.0292685	0.00723395	0.463489	0.00033836	0.0185396	3.19214e-05	0.00622421	3.93826e-05	0.0146265	0.39384	0.000156285	0.000115896	0.00507998	5.80267e-06	0.00398741	0.000441223	5.66593e-05	4.92742e-06
H11	0.0123454	0.0254464	0.00075823	0.452598	0.00960309	0.0192298	0.00597746	0.0122432	9.03815e-05	0.000156285	0.370645	0.0147101	0.00159643	0.000665357	0.000177431	0.000272768	0.000527121	0.000683716
H12	0.00254684	0.0303495	0.000417299	0.467409	0.000343711	0.0203829	0.000516247	0.00819127	9.03626e-05	0.000115896	0.0147101	0.402846	3.08837e-05	0.00221512	9.52159e-05	1.96859e-05	0.000466474	0.000725357
H13	0.00552879	0.000608449	0.0199686	0.00060015	0.473556	9.75196e-05	0.0293229	0.000137463	0.00168467	0.00507998	0.00159643	3.08837e-05	0.415467	4.83101e-06	0.00676254	0.00365608	5.18947e-05	4.78618e-06
H14	0.00166796	0.00688642	5.52829e-05	0.0203419	5.13996e-05	0.47385	8.79293e-05	0.0299573	2.34495e-05	5.80267e-06	0.000665357	0.00221512	4.83101e-06	0.416685	4.76813e-05	1.73351e-05	0.00662038	0.00404398
H15	0.00131712	0.0033735	0.0062029	0.000244335	0.0293731	0.000576061	0.478291	0.00183538	0.00048021	0.00398741	0.000177431	9.52159e-05	0.00676254	4.76813e-05	0.407175	0.0166323	0.00148796	6.44707e-05
H16	0.00149486	0.000347238	0.0062648	0.000152685	0.0300976	0.000613715	0.483112	0.000683978	0.000812437	0.000441223	0.000272768	1.96859e-05	0.00365608	1.73351e-05	0.0166323	0.410352	6.48978e-05	1.45571e-05
H17	0.0015867	0.0214741	0.000192156	0.00435142	0.000317387	0.0292499	0.00158095	0.472794	2.31248e-05	5.66593e-05	0.000527121	0.000466474	5.18947e-05	0.00662038	0.00148796	6.48978e-05	0.392277	0.015947
H18	0.0002311	0.00163604	2.21912e-05	0.00648974	2.68759e-05	0.0311995	0.000117305	0.48415	2.64059e-06	4.92742e-06	0.000683716	0.000725357	4.78618e-06	0.00404398	6.44707e-05	1.45571e-05	0.015947	0.413591
LDM — diallyl_disufide_16_LIDI_matrix
	S1	S2	C3	C4	C5	C6	C7	C8	H9	H10	H11	H12	H13	H14	H15	H16	H17	H18
S1	14.6349	0.66146	0.528328	0.0390863	0.0393721	0.00779435	0.0225577	0.0017598	0.0259421	0.0304429	0.00633764	0.00850238	0.00210983	0.0103388	0.00107176	0.00149508	0.00043561	0.000202744
S2	0.66146	14.639	0.039344	0.52679	0.00872397	0.0425738	0.00190639	0.0213746	0.00860007	0.00608116	0.0285613	0.0257523	0.00945231	0.00392035	0.000387316	0.000173624	0.000993189	0.00151267
C3	0.528328	0.039344	4.01067	0.00173873	0.515901	0.000539089	0.0365025	0.000198913	0.463977	0.464795	0.000719273	0.000246044	0.0192186	0.000395119	0.00622077	0.00632429	2.83124e-05	2.60996e-05
C4	0.0390863	0.52679	0.00173873	4.01191	0.00376443	0.515707	0.00116057	0.0370746	0.000403921	0.000323782	0.458565	0.464714	0.00323083	0.0192374	8.41306e-05	5.78361e-05	0.00638619	0.00634492
C5	0.0393721	0.00872397	0.515901	0.00376443	3.96947	0.000270038	0.920729	0.000245192	0.0183308	0.0195998	0.00802931	0.000238928	0.46847	7.37743e-05	0.0303936	0.0304685	1.36517e-05	2.21391e-05
C6	0.00779435	0.0425738	0.000539089	0.515707	0.000270038	3.97141	0.000127209	0.92366	6.99105e-05	0.000161153	0.0189765	0.0183871	0.000334128	0.469883	9.6609e-06	6.99072e-06	0.0307434	0.0304701
C7	0.0225577	0.00190639	0.0365025	0.00116057	0.920729	0.000127209	4.08301	9.51703e-05	0.00646463	0.00846246	0.00291161	5.56132e-05	0.0292579	3.4314e-05	0.481449	0.484	6.8371e-06	1.29013e-05
C8	0.0017598	0.0213746	0.000198913	0.0370746	0.000245192	0.92366	9.51703e-05	4.08423	3.8352e-05	6.185e-05	0.0090544	0.00654183	0.000222639	0.0287983	8.46549e-06	6.15587e-06	0.482053	0.484092
H9	0.0259421	0.00860007	0.463977	0.000403921	0.0183308	6.99105e-05	0.00646463	3.8352e-05	0.399755	0.0147067	0.000137962	0.000120308	0.00497717	1.31064e-05	0.00406667	0.00048207	3.56779e-06	5.83419e-06
H10	0.0304429	0.00608116	0.464795	0.000323782	0.0195998	0.000161153	0.00846246	6.185e-05	0.0147067	0.393835	8.96376e-05	1.93375e-05	0.00153413	0.000171731	0.00045739	0.000811187	7.49713e-06	7.23358e-06
H11	0.00633764	0.0285613	0.000719273	0.458565	0.00802931	0.0189765	0.00291161	0.0090544	0.000137962	8.96376e-05	0.384576	0.0144031	0.00509996	0.00112892	0.000138616	0.000130901	0.00043985	0.00073766
H12	0.00850238	0.0257523	0.000246044	0.464714	0.000238928	0.0183871	5.56132e-05	0.00654183	0.000120308	1.93375e-05	0.0144031	0.401807	0.000125229	0.00515302	6.64087e-06	4.57681e-06	0.00436447	0.000493836
H13	0.00210983	0.00945231	0.0192186	0.00323083	0.46847	0.000334128	0.0292579	0.000222639	0.00497717	0.00153413	0.00509996	0.000125229	0.405856	1.31738e-05	0.00665345	0.00365371	9.36229e-06	2.2585e-05
H14	0.0103388	0.00392035	0.000395119	0.0192374	7.37743e-05	0.469883	3.4314e-05	0.0287983	1.31064e-05	0.000171731	0.00112892	0.00515302	1.31738e-05	0.402961	2.0513e-06	1.83216e-06	0.00665837	0.00361195
H15	0.00107176	0.000387316	0.00622077	8.41306e-05	0.0303936	9.6609e-06	0.481449	8.46549e-06	0.00406667	0.00045739	0.000138616	6.64087e-06	0.00665345	2.0513e-06	0.414544	0.0169432	6.40096e-07	1.12555e-06
H16	0.00149508	0.000173624	0.00632429	5.78361e-05	0.0304685	6.99072e-06	0.484	6.15587e-06	0.00048207	0.000811187	0.000130901	4.57681e-06	0.00365371	1.83216e-06	0.0169432	0.411273	4.6538e-07	6.17e-07
H17	0.00043561	0.000993189	2.83124e-05	0.00638619	1.36517e-05	0.0307434	6.8371e-06	0.482053	3.56779e-06	7.49713e-06	0.00043985	0.00436447	9.36229e-06	0.00665837	6.40096e-07	4.6538e-07	0.418017	0.0170623
H18	0.000202744	0.00151267	2.60996e-05	0.00634492	2.21391e-05	0.0304701	1.29013e-05	0.484092	5.83419e-06	7.23358e-06	0.00073766	0.000493836	2.2585e-05	0.00361195	1.12555e-06	6.17e-07	0.0170623	0.411974
LDM — diallyl_disufide_17_LIDI_matrix
	S1	S2	C3	C4	C5	C6	C7	C8	H9	H10	H11	H12	H13	H14	H15	H16	H17	H18
S1	14.6404	0.660668	0.52533	0.0399967	0.0425757	0.00895319	0.0209091	0.00503925	0.0296094	0.0284439	0.0116892	0.00238447	0.00615544	0.000333933	0.00126363	0.00109135	0.000496826	0.000236323
S2	0.660668	14.6403	0.0399986	0.52533	0.00895205	0.0425908	0.00503921	0.0209078	0.00238259	0.0116886	0.0284281	0.0296096	0.000333837	0.00615549	0.00023631	0.000496826	0.00109129	0.0012636
C3	0.52533	0.0399986	4.01014	0.00205694	0.515837	0.000476554	0.037386	0.000200903	0.466513	0.462469	0.000335688	0.00146152	0.0195451	0.000129842	0.00634641	0.00635278	1.4846e-05	1.91579e-05
C4	0.0399967	0.52533	0.00205694	4.0099	0.000476171	0.515809	0.00020082	0.0374012	0.00146088	0.000335745	0.462399	0.466499	0.000129794	0.0195277	1.91539e-05	1.48361e-05	0.00635397	0.00635202
C5	0.0425757	0.00895205	0.515837	0.000476171	3.97696	0.00020245	0.920977	0.000160015	0.018788	0.0187521	4.98344e-05	0.000197861	0.473047	2.78004e-05	0.0303384	0.0301856	1.14208e-05	7.78796e-06
C6	0.00895319	0.0425908	0.000476554	0.515809	0.00020245	3.977	0.000159989	0.921011	0.000197884	4.98886e-05	0.018757	0.01879	2.78006e-05	0.47303	7.7879e-06	1.14195e-05	0.0301814	0.0303446
C7	0.0209091	0.00503921	0.037386	0.00020082	0.920977	0.000159989	4.0819	0.000124087	0.00654306	0.00920847	2.37506e-05	3.72097e-05	0.0292835	1.69503e-05	0.481123	0.483585	9.61552e-06	5.45531e-06
C8	0.00503925	0.0209078	0.000200903	0.0374012	0.000160015	0.921011	0.000124087	4.08191	3.72087e-05	2.37472e-05	0.00920877	0.00654163	1.69501e-05	0.0292845	5.45563e-06	9.61528e-06	0.483595	0.481119
H9	0.0296094	0.00238259	0.466513	0.00146088	0.018788	0.000197884	0.00654306	3.72087e-05	0.40697	0.01509	9.48838e-05	0.00159906	0.00511215	6.39599e-05	0.00418542	0.00047983	6.3079e-06	9.67818e-06
H10	0.0284439	0.0116886	0.462469	0.000335745	0.0187521	4.98886e-05	0.00920847	2.37472e-05	0.01509	0.388974	0.000168431	9.48721e-05	0.00162875	1.11138e-05	0.000535555	0.000800039	1.0707e-06	3.04661e-06
H11	0.0116892	0.0284281	0.000335688	0.462399	4.98344e-05	0.018757	2.37506e-05	0.00920877	9.48838e-05	0.000168431	0.388976	0.0150899	1.11143e-05	0.00162877	3.04593e-06	1.07052e-06	0.000800016	0.000535556
H12	0.00238447	0.0296096	0.00146152	0.466499	0.000197861	0.01879	3.72097e-05	0.00654163	0.00159906	9.48721e-05	0.0150899	0.406966	6.39558e-05	0.00511212	9.67572e-06	6.30758e-06	0.000479776	0.00418519
H13	0.00615544	0.000333837	0.0195451	0.000129794	0.473047	2.78006e-05	0.0292835	1.69501e-05	0.00511215	0.00162875	1.11143e-05	6.39558e-05	0.408256	2.01903e-06	0.00677826	0.00363053	2.10786e-06	8.72101e-07
H14	0.000333933	0.00615549	0.000129842	0.0195277	2.78004e-05	0.47303	1.69503e-05	0.0292845	6.39599e-05	1.11138e-05	0.00162877	0.00511212	2.01903e-06	0.408251	8.7223e-07	2.10792e-06	0.00363047	0.00677825
H15	0.00126363	0.00023631	0.00634641	1.91539e-05	0.0303384	7.7879e-06	0.481123	5.45563e-06	0.00418542	0.000535555	3.04593e-06	9.67572e-06	0.00677826	8.7223e-07	0.413007	0.0168377	5.19346e-07	2.77438e-07
H16	0.00109135	0.000496826	0.00635278	1.48361e-05	0.0301856	1.14195e-05	0.483585	9.61528e-06	0.00047983	0.000800039	1.07052e-06	6.30758e-06	0.00363053	2.10792e-06	0.0168377	0.409345	6.06261e-07	5.19276e-07
H17	0.000496826	0.00109129	1.4846e-05	0.00635397	1.14208e-05	0.0301814	9.61552e-06	0.483595	6.3079e-06	1.0707e-06	0.000800016	0.000479776	2.10786e-06	0.00363047	5.19346e-07	6.06261e-07	0.409349	0.0168381
H18	0.000236323	0.0012636	1.91579e-05	0.00635202	7.78796e-06	0.0303446	5.45531e-06	0.481119	9.67818e-06	3.04661e-06	0.000535556	0.00418519	8.72101e-07	0.00677825	2.77438e-07	5.19276e-07	0.0168381	0.413006
LDM — diallyl_disufide_18_LIDI_matrix
	S1	S2	C3	C4	C5	C6	C7	C8	H9	H10	H11	H12	H13	H14	H15	H16	H17	H18
S1	14.6321	0.659607	0.525147	0.0393353	0.0424046	0.00870243	0.0208616	0.00182158	0.0294134	0.0284769	0.0085851	0.00573233	0.00601411	0.0119333	0.00126318	0.00108776	0.00046359	0.000212101
S2	0.659607	14.6401	0.040312	0.528879	0.00922691	0.0419413	0.00521062	0.0209612	0.00263585	0.0112384	0.0255992	0.0299807	0.000341829	0.00385227	0.000240888	0.000506167	0.000965301	0.00152468
C3	0.525147	0.040312	4.00941	0.00216364	0.515821	0.00051713	0.0374708	0.000190012	0.465937	0.46271	0.000232691	0.00223211	0.0195821	0.000354961	0.00634263	0.00635149	2.47067e-05	2.40948e-05
C4	0.0393353	0.528879	0.00216364	4.00916	0.000509518	0.515549	0.000226958	0.0370834	0.00184242	0.000320177	0.464209	0.463832	0.00013565	0.0191834	2.02745e-05	1.68059e-05	0.00638346	0.00633819
C5	0.0424046	0.00922691	0.515821	0.000509518	3.97728	7.49178e-05	0.921052	5.61094e-05	0.0187159	0.0187593	0.000136276	0.000314185	0.473096	3.99527e-05	0.0303159	0.0301672	5.81806e-06	5.30836e-06
C6	0.00870243	0.0419413	0.00051713	0.515549	7.49178e-05	3.97285	4.29505e-05	0.92409	0.000148346	0.000177682	0.0182713	0.0194996	9.04165e-06	0.469388	3.36725e-06	4.63548e-06	0.0307711	0.030484
C7	0.0208616	0.00521062	0.0374708	0.000226958	0.921052	4.29505e-05	4.08133	1.54118e-05	0.00655524	0.00913731	0.00010258	8.28946e-05	0.029302	3.90975e-05	0.481059	0.483503	3.85001e-06	3.78402e-06
C8	0.00182158	0.0209612	0.000190012	0.0370834	5.61094e-05	0.92409	1.54118e-05	4.08374	0.000141492	8.17188e-05	0.00652541	0.00947117	7.60792e-06	0.0287398	1.66375e-06	3.05369e-06	0.481999	0.484003
H9	0.0294134	0.00263585	0.465937	0.00184242	0.0187159	0.000148346	0.00655524	0.000141492	0.407011	0.0151079	0.000166656	0.00266779	0.00508592	5.49463e-05	0.00418229	0.000481924	8.95007e-06	1.3117e-05
H10	0.0284769	0.0112384	0.46271	0.000320177	0.0187593	0.000177682	0.00913731	8.17188e-05	0.0151079	0.389353	2.08069e-05	9.26845e-05	0.0016301	0.000137566	0.000533606	0.000800402	6.64717e-06	7.9228e-06
H11	0.0085851	0.0255992	0.000232691	0.464209	0.000136276	0.0182713	0.00010258	0.00652541	0.000166656	2.08069e-05	0.400025	0.014844	2.80595e-05	0.00512409	5.35364e-06	5.29021e-06	0.00434757	0.00049316
H12	0.00573233	0.0299807	0.00223211	0.463832	0.000314185	0.0194996	8.28946e-05	0.00947117	0.00266779	9.26845e-05	0.014844	0.398561	9.59899e-05	0.0010769	1.76894e-05	1.00849e-05	0.000456008	0.000774047
H13	0.00601411	0.000341829	0.0195821	0.00013565	0.473096	9.04165e-06	0.029302	7.60792e-06	0.00508592	0.0016301	2.80595e-05	9.59899e-05	0.408101	9.11266e-06	0.00677456	0.00362952	1.11061e-06	1.00407e-06
H14	0.0119333	0.00385227	0.000354961	0.0191834	3.99527e-05	0.469388	3.90975e-05	0.0287398	5.49463e-05	0.000137566	0.00512409	0.0010769	9.11266e-06	0.401385	3.34089e-06	1.37961e-06	0.006625	0.00360757
H15	0.00126318	0.000240888	0.00634263	2.02745e-05	0.0303159	3.36725e-06	0.481059	1.66375e-06	0.00418229	0.000533606	5.35364e-06	1.76894e-05	0.00677456	3.34089e-06	0.412856	0.0168209	2.81292e-07	2.7799e-07
H16	0.00108776	0.000506167	0.00635149	1.68059e-05	0.0301672	4.63548e-06	0.483503	3.05369e-06	0.000481924	0.000800402	5.29021e-06	1.00849e-05	0.00362952	1.37961e-06	0.0168209	0.408967	2.41799e-07	3.40293e-07
H17	0.00046359	0.000965301	2.47067e-05	0.00638346	5.81806e-06	0.0307711	3.85001e-06	0.481999	8.95007e-06	6.64717e-06	0.00434757	0.000456008	1.11061e-06	0.006625	2.81292e-07	2.41799e-07	0.417839	0.0170523
H18	0.000212101	0.00152468	2.40948e-05	0.00633819	5.30836e-06	0.030484	3.78402e-06	0.484003	1.3117e-05	7.9228e-06	0.00049316	0.000774047	1.00407e-06	0.00360757	2.7799e-07	3.40293e-07	0.0170523	0.411775
LDM — diallyl_disufide_19_LIDI_matrix
	S1	S2	C3	C4	C5	C6	C7	C8	H9	H10	H11	H12	H13	H14	H15	H16	H17	H18
S1	14.6418	0.659473	0.525324	0.0402946	0.0423887	0.00912608	0.0208904	0.00510684	0.0285241	0.0295668	0.0027066	0.0113681	0.00592832	0.00033983	0.00127936	0.00109494	0.000237784	0.000500965
S2	0.659473	14.6427	0.0401064	0.525744	0.00943869	0.0422978	0.00525717	0.020813	0.00709217	0.00479123	0.029453	0.0285719	0.000517161	0.0060027	0.000254476	0.000488848	0.00125732	0.00108823
C3	0.525324	0.0401064	4.0066	0.00213012	0.515741	0.000482908	0.0373128	0.000205152	0.46408	0.465312	0.00176103	0.000360188	0.0196991	0.000131001	0.00631772	0.0063402	1.94248e-05	1.56906e-05
C4	0.0402946	0.525744	0.00213012	4.009	0.000383494	0.515837	0.000191672	0.0374002	0.00213144	0.000371816	0.466015	0.462689	6.82262e-05	0.0196296	1.75913e-05	1.63411e-05	0.0063448	0.00635299
C5	0.0423887	0.00943869	0.515741	0.000383494	3.97793	0.000168264	0.921066	0.000128094	0.0193227	0.0183182	0.00018392	4.35554e-05	0.473686	2.8379e-05	0.0302095	0.0302322	6.85891e-06	8.02781e-06
C6	0.00912608	0.0422978	0.000482908	0.515837	0.000168264	3.97698	0.000139389	0.921107	0.000296143	4.59038e-05	0.0187671	0.0187795	1.01053e-05	0.473074	5.88046e-06	9.86187e-06	0.0303427	0.0301819
C7	0.0208904	0.00525717	0.0373128	0.000191672	0.921066	0.000139389	4.08063	9.13111e-05	0.00910394	0.00641483	0.000134342	8.3823e-06	0.0295107	1.98561e-05	0.480753	0.483591	4.61787e-06	6.09658e-06
C8	0.00510684	0.020813	0.000205152	0.0374002	0.000128094	0.921107	9.13111e-05	4.08144	7.13402e-05	2.86366e-05	0.00655046	0.00916638	4.66108e-06	0.029316	4.05911e-06	7.71853e-06	0.481096	0.483542
H9	0.0285241	0.00709217	0.46408	0.00213144	0.0193227	0.000296143	0.00910394	7.13402e-05	0.399325	0.0151014	0.00254562	8.88252e-05	0.00168728	9.53834e-05	0.000534947	0.000816858	1.75009e-05	8.95226e-06
H10	0.0295668	0.00479123	0.465312	0.000371816	0.0183182	4.59038e-05	0.00641483	2.86366e-05	0.0151014	0.398276	0.000112737	0.000164895	0.005084	6.01706e-06	0.00401996	0.000465434	2.24675e-06	3.17398e-06
H11	0.0027066	0.029453	0.00176103	0.466015	0.00018392	0.0187671	0.000134342	0.00655046	0.00254562	0.000112737	0.407559	0.0151176	1.00391e-05	0.00509936	7.30978e-06	1.72874e-05	0.00418568	0.000481806
H12	0.0113681	0.0285719	0.000360188	0.462689	4.35554e-05	0.0187795	8.3823e-06	0.00916638	8.88252e-05	0.000164895	0.0151176	0.389554	1.7914e-05	0.00162982	2.46577e-06	6.52815e-07	0.000534759	0.000800854
H13	0.00592832	0.000517161	0.0196991	6.82262e-05	0.473686	1.01053e-05	0.0295107	4.66108e-06	0.00168728	0.005084	1.00391e-05	1.7914e-05	0.411176	7.97368e-07	0.00678092	0.00365797	3.11372e-07	4.14356e-07
H14	0.00033983	0.0060027	0.000131001	0.0196296	2.8379e-05	0.473074	1.98561e-05	0.029316	9.53834e-05	6.01706e-06	0.00509936	0.00162982	7.97368e-07	0.408364	1.03612e-06	2.45185e-06	0.00677961	0.00363339
H15	0.00127936	0.000254476	0.00631772	1.75913e-05	0.0302095	5.88046e-06	0.480753	4.05911e-06	0.000534947	0.00401996	7.30978e-06	2.46577e-06	0.00678092	1.03612e-06	0.410686	0.0167744	2.37601e-07	2.64358e-07
H16	0.00109494	0.000488848	0.0063402	1.63411e-05	0.0302322	9.86187e-06	0.483591	7.71853e-06	0.000816858	0.000465434	1.72874e-05	6.52815e-07	0.00365797	2.45185e-06	0.0167744	0.409619	4.77328e-07	4.20227e-07
H17	0.000237784	0.00125732	1.94248e-05	0.0063448	6.85891e-06	0.0303427	4.61787e-06	0.481096	1.75009e-05	2.24675e-06	0.00418568	0.000534759	3.11372e-07	0.00677961	2.37601e-07	4.77328e-07	0.413039	0.0168347
H18	0.000500965	0.00108823	1.56906e-05	0.00635299	8.02781e-06	0.0301819	6.09658e-06	0.483542	8.95226e-06	3.17398e-06	0.000481806	0.000800854	4.14356e-07	0.00363339	2.64358e-07	4.20227e-07	0.0168347	0.409241
LDM — diallyl_disufide_20_LIDI_matrix
	S1	S2	C3	C4	C5	C6	C7	C8	H9	H10	H11	H12	H13	H14	H15	H16	H17	H18
S1	14.6411	0.658272	0.529049	0.0403297	0.0420252	0.00955559	0.0209312	0.00535258	0.0298121	0.0255013	0.00750562	0.00480067	0.00392366	0.000512579	0.000967009	0.00152408	0.0004992	0.000256833
S2	0.658272	14.6324	0.0395387	0.524989	0.00861481	0.0423671	0.00185146	0.0209122	0.00634924	0.00864566	0.0283252	0.0294552	0.0118313	0.00590105	0.000464939	0.00021481	0.0010911	0.00128552
C3	0.529049	0.0395387	4.00861	0.00228036	0.515407	0.000421885	0.0370588	0.000230086	0.463243	0.464204	0.00246869	0.000359765	0.0192027	7.02004e-05	0.00638013	0.00633532	1.93199e-05	1.88334e-05
C4	0.0403297	0.524989	0.00228036	4.00668	0.000552582	0.515671	0.000208108	0.0373465	0.00246502	0.000239467	0.463514	0.465214	0.0003744	0.0197109	2.65872e-05	2.69496e-05	0.00633631	0.00631847
C5	0.0420252	0.00861481	0.515407	0.000552582	3.97262	7.00595e-05	0.923993	3.31619e-05	0.0194871	0.0182225	0.000201783	0.00015417	0.46944	1.17861e-05	0.0307244	0.0304701	3.74867e-06	3.02452e-06
C6	0.00955559	0.0423671	0.000421885	0.515671	7.00595e-05	3.97804	4.04218e-05	0.921012	0.000261344	0.000110562	0.0192576	0.0182698	3.70005e-05	0.473675	3.95314e-06	3.40255e-06	0.0302044	0.0301848
C7	0.0209312	0.00185146	0.0370588	0.000208108	0.923993	4.04218e-05	4.08371	1.26653e-05	0.0094658	0.00651051	0.000192455	6.24082e-05	0.0287385	8.11171e-06	0.481991	0.483991	3.39381e-06	2.4088e-06
C8	0.00535258	0.0209122	0.000230086	0.0373465	3.31619e-05	0.921012	1.26653e-05	4.08024	0.000180704	8.23404e-05	0.00906029	0.00639268	1.1904e-05	0.0294966	2.15737e-06	2.69237e-06	0.483515	0.480671
H9	0.0298121	0.00634924	0.463243	0.00246502	0.0194871	0.000261344	0.0094658	0.000180704	0.399099	0.014832	0.00356237	0.000150607	0.00107833	2.13494e-05	0.000454923	0.000771861	2.46639e-05	1.10615e-05
H10	0.0255013	0.00864566	0.464204	0.000239467	0.0182225	0.000110562	0.00651051	8.23404e-05	0.014832	0.399883	0.000235811	2.28879e-05	0.00512674	4.67355e-06	0.00434279	0.000492214	4.40198e-06	3.24662e-06
H11	0.00750562	0.0283252	0.00246869	0.463514	0.000201783	0.0192576	0.000192455	0.00906029	0.00356237	0.000235811	0.399265	0.0150794	2.96089e-05	0.00169761	1.06233e-05	1.85781e-05	0.000814337	0.000534692
H12	0.00480067	0.0294552	0.000359765	0.465214	0.00015417	0.0182698	6.24082e-05	0.00639268	0.000150607	2.28879e-05	0.0150794	0.397923	0.00017666	0.00507369	7.38121e-06	6.69662e-06	0.000463318	0.00400661
H13	0.00392366	0.0118313	0.0192027	0.0003744	0.46944	3.70005e-05	0.0287385	1.1904e-05	0.00107833	0.00512674	2.96089e-05	0.00017666	0.401838	1.76676e-05	0.00662764	0.00360878	6.845e-07	2.71537e-06
H14	0.000512579	0.00590105	7.02004e-05	0.0197109	1.17861e-05	0.473675	8.11171e-06	0.0294966	2.13494e-05	4.67355e-06	0.00169761	0.00507369	1.76676e-05	0.41121	6.80829e-07	8.45831e-07	0.00365631	0.00677856
H15	0.000967009	0.000464939	0.00638013	2.65872e-05	0.0307244	3.95314e-06	0.481991	2.15737e-06	0.000454923	0.00434279	1.06233e-05	7.38121e-06	0.00662764	6.80829e-07	0.417736	0.017046	1.98333e-07	1.96709e-07
H16	0.00152408	0.00021481	0.00633532	2.69496e-05	0.0304701	3.40255e-06	0.483991	2.69237e-06	0.000771861	0.000492214	1.85781e-05	6.69662e-06	0.00360878	8.45831e-07	0.017046	0.41171	2.62364e-07	1.9769e-07
H17	0.0004992	0.0010911	1.93199e-05	0.00633631	3.74867e-06	0.0302044	3.39381e-06	0.483515	2.46639e-05	4.40198e-06	0.000814337	0.000463318	6.845e-07	0.00365631	1.98333e-07	2.62364e-07	0.409274	0.0167536
H18	0.000256833	0.00128552	1.88334e-05	0.00631847	3.02452e-06	0.0301848	2.4088e-06	0.480671	1.10615e-05	3.24662e-06	0.000534692	0.00400661	2.71537e-06	0.00677856	1.96709e-07	1.9769e-07	0.0167536	0.410432
LDM — diallyl_disufide_21_LIDI_matrix
	S1	S2	C3	C4	C5	C6	C7	C8	H9	H10	H11	H12	H13	H14	H15	H16	H17	H18
S1	14.6431	0.658249	0.525516	0.0403368	0.0421353	0.00948135	0.0207478	0.00525761	0.029571	0.0284169	0.00769305	0.00481614	0.00593455	0.000517037	0.00126679	0.0010917	0.000494521	0.000253838
S2	0.658249	14.6431	0.0402875	0.52556	0.00948007	0.0421396	0.00525772	0.020745	0.00481564	0.00769431	0.0284115	0.02956	0.000517034	0.0059336	0.000253829	0.000494518	0.00109163	0.0012667
C3	0.525516	0.0402875	4.00606	0.00225697	0.515678	0.000387922	0.0373264	0.000200278	0.465258	0.463531	0.00235946	0.000406249	0.0197033	7.38611e-05	0.00632574	0.00633768	1.77048e-05	1.81583e-05
C4	0.0403368	0.52556	0.00225697	4.00614	0.000388561	0.515749	0.00020079	0.0373541	0.000406942	0.00235998	0.463546	0.46527	7.39449e-05	0.0197067	1.81871e-05	1.77424e-05	0.00633953	0.00632993
C5	0.0421353	0.00948007	0.515678	0.000388561	3.97791	0.000143474	0.921153	0.000106491	0.0182966	0.0193016	0.000245408	4.30342e-05	0.473626	8.55867e-06	0.0302019	0.030229	7.04034e-06	4.60445e-06
C6	0.00948135	0.0421396	0.000387922	0.515749	0.000143474	3.97802	0.000106501	0.921128	4.30496e-05	0.000245476	0.0193091	0.0182958	8.56103e-06	0.473662	4.60478e-06	7.03914e-06	0.0302308	0.0302027
C7	0.0207478	0.00525772	0.0373264	0.00020079	0.921153	0.000106501	4.08063	5.77941e-05	0.00640664	0.00913435	0.00016225	2.26832e-05	0.0295014	5.00902e-06	0.480753	0.483585	5.46964e-06	2.865e-06
C8	0.00525761	0.020745	0.000200278	0.0373541	0.000106491	0.921128	5.77941e-05	4.08048	2.26772e-05	0.000162236	0.00913273	0.00639549	5.00848e-06	0.0294957	2.86478e-06	5.46864e-06	0.483568	0.480724
H9	0.029571	0.00481564	0.465258	0.000406942	0.0182966	4.30496e-05	0.00640664	2.26772e-05	0.398262	0.0151037	0.000154566	0.000134542	0.00508703	1.05039e-05	0.0040248	0.000464535	2.37683e-06	2.16161e-06
H10	0.0284169	0.00769431	0.463531	0.00235998	0.0193016	0.000245476	0.00913435	0.000162236	0.0151037	0.399903	0.00334705	0.000154583	0.0016828	2.51493e-05	0.000535299	0.000815092	2.29755e-05	1.07677e-05
H11	0.00769305	0.0284115	0.00235946	0.463546	0.000245408	0.0193091	0.00016225	0.00913273	0.000154566	0.00334705	0.399905	0.0151041	2.51461e-05	0.00168283	1.07672e-05	2.29746e-05	0.000815084	0.000535281
H12	0.00481614	0.02956	0.000406249	0.46527	4.30342e-05	0.0182958	2.26832e-05	0.00639549	0.000134542	0.000154583	0.0151041	0.398261	1.05042e-05	0.00508696	2.16162e-06	2.37682e-06	0.000464506	0.00402473
H13	0.00593455	0.000517034	0.0197033	7.39449e-05	0.473626	8.56103e-06	0.0295014	5.00848e-06	0.00508703	0.0016828	2.51461e-05	1.05042e-05	0.411141	9.24328e-07	0.00678066	0.0036581	4.61301e-07	3.03042e-07
H14	0.000517037	0.0059336	7.38611e-05	0.0197067	8.55867e-06	0.473662	5.00902e-06	0.0294957	1.05039e-05	2.51493e-05	0.00168283	0.00508696	9.24328e-07	0.411138	3.03191e-07	4.61291e-07	0.00365805	0.00678062
H15	0.00126679	0.000253829	0.00632574	1.81871e-05	0.0302019	4.60478e-06	0.480753	2.86478e-06	0.0040248	0.000535299	1.07672e-05	2.16162e-06	0.00678066	3.03191e-07	0.410706	0.0167712	2.40083e-07	1.38695e-07
H16	0.0010917	0.000494518	0.00633768	1.77424e-05	0.030229	7.03914e-06	0.483585	5.46864e-06	0.000464535	0.000815092	2.29746e-05	2.37682e-06	0.0036581	4.61291e-07	0.0167712	0.409534	3.36608e-07	2.40004e-07
H17	0.000494521	0.00109163	1.77048e-05	0.00633953	7.04034e-06	0.0302308	5.46964e-06	0.483568	2.37683e-06	2.29755e-05	0.000815084	0.000464506	4.61301e-07	0.00365805	2.40083e-07	3.36608e-07	0.409539	0.016771
H18	0.000253838	0.0012667	1.81583e-05	0.00632993	4.60445e-06	0.0302027	2.865e-06	0.480724	2.16161e-06	1.07677e-05	0.000535281	0.00402473	3.03042e-07	0.00678062	1.38695e-07	2.40004e-07	0.016771	0.410706
LDM — diallyl_disufide_22_LIDI_matrix
	S1	S2	C3	C4	C5	C6	C7	C8	H9	H10	H11	H12	H13	H14	H15	H16	H17	H18
S1	14.6311	0.658737	0.528515	0.0396383	0.0419572	0.0085605	0.0209197	0.00186058	0.0297502	0.0255734	0.00619818	0.00870008	0.00389622	0.0117091	0.000964797	0.00151428	0.000464053	0.000214263
S2	0.658737	14.6309	0.0395646	0.528656	0.00855576	0.0419309	0.00186017	0.0209188	0.0061984	0.00870028	0.0297426	0.0255628	0.0117101	0.00389147	0.000464034	0.000214222	0.00096448	0.0015143
C3	0.528515	0.0395646	4.00916	0.00233668	0.515498	0.000500459	0.0370691	0.000192466	0.463175	0.464118	0.00259095	0.000265045	0.0191965	0.000325322	0.00638137	0.00633362	2.48351e-05	2.48899e-05
C4	0.0396383	0.528656	0.00233668	4.00922	0.000501354	0.515645	0.000192898	0.0371263	0.00259071	0.000265401	0.463138	0.464126	0.000325955	0.0192419	2.48732e-05	2.49257e-05	0.00638929	0.00633557
C5	0.0419572	0.00855576	0.515498	0.000501354	3.97266	0.000175811	0.924034	8.06121e-05	0.0194385	0.0182489	0.000197008	4.43934e-05	0.469481	0.00017211	0.030759	0.0304636	8.64596e-06	8.17262e-06
C6	0.0085605	0.0419309	0.000500459	0.515645	0.000175811	3.97275	8.06397e-05	0.92406	0.000197026	4.44236e-05	0.0194405	0.0182476	0.000172108	0.469509	8.64831e-06	8.17406e-06	0.0307572	0.0304683
C7	0.0209197	0.00186017	0.0370691	0.000192898	0.924034	8.06397e-05	4.08348	1.41942e-05	0.00943428	0.00651213	0.00018738	2.78483e-05	0.0287411	0.000107513	0.481962	0.483967	6.60123e-06	5.16078e-06
C8	0.00186058	0.0209188	0.000192466	0.0371263	8.06121e-05	0.92406	1.41942e-05	4.08348	0.000187373	2.78545e-05	0.00943434	0.00651016	0.000107517	0.0287421	6.60133e-06	5.16086e-06	0.481953	0.483965
H9	0.0297502	0.0061984	0.463175	0.00259071	0.0194385	0.000197026	0.00943428	0.000187373	0.398449	0.014821	0.00379803	0.000255163	0.00108054	3.1052e-05	0.000454691	0.000770578	1.07412e-05	1.88084e-05
H10	0.0255734	0.00870028	0.464118	0.000265401	0.0182489	4.44236e-05	0.00651213	2.78545e-05	0.014821	0.399611	0.000255176	7.18136e-05	0.00512683	1.26845e-05	0.00434284	0.000492345	1.89418e-06	1.92413e-06
H11	0.00619818	0.0297426	0.00259095	0.463138	0.000197008	0.0194405	0.00018738	0.00943434	0.00379803	0.000255176	0.398451	0.0148208	3.10577e-05	0.00108042	1.07417e-05	1.88101e-05	0.00045468	0.000770549
H12	0.00870008	0.0255628	0.000265045	0.464126	4.43934e-05	0.0182476	2.78483e-05	0.00651016	0.000255163	7.18136e-05	0.0148208	0.399607	1.26874e-05	0.00512682	1.89433e-06	1.92423e-06	0.00434289	0.000492356
H13	0.00389622	0.0117101	0.0191965	0.000325955	0.469481	0.000172108	0.0287411	0.000107517	0.00108054	0.00512683	3.10577e-05	1.26874e-05	0.401865	9.64129e-06	0.00662683	0.0036078	4.00011e-06	9.38885e-06
H14	0.0117091	0.00389147	0.000325322	0.0192419	0.00017211	0.469509	0.000107513	0.0287421	3.1052e-05	1.26845e-05	0.00108042	0.00512682	9.64129e-06	0.401861	4.00023e-06	9.38855e-06	0.00662676	0.00360773
H15	0.000964797	0.000464034	0.00638137	2.48732e-05	0.030759	8.64831e-06	0.481962	6.60133e-06	0.000454691	0.00434284	1.07417e-05	1.89433e-06	0.00662683	4.00023e-06	0.417579	0.0170326	5.37525e-07	6.77439e-07
H16	0.00151428	0.000214222	0.00633362	2.49257e-05	0.0304636	8.17406e-06	0.483967	5.16086e-06	0.000770578	0.000492345	1.88101e-05	1.92423e-06	0.0036078	9.38855e-06	0.0170326	0.411463	6.77513e-07	6.5002e-07
H17	0.000464053	0.00096448	2.48351e-05	0.00638929	8.64596e-06	0.0307572	6.60123e-06	0.481953	1.07412e-05	1.89418e-06	0.00045468	0.00434289	4.00011e-06	0.00662676	5.37525e-07	6.77513e-07	0.417576	0.017033
H18	0.000214263	0.0015143	2.48899e-05	0.00633557	8.17262e-06	0.0304683	5.16078e-06	0.483965	1.88084e-05	1.92413e-06	0.000770549	0.000492356	9.38885e-06	0.00360773	6.77439e-07	6.5002e-07	0.017033	0.411458
Weighted Ensemble LDM (Σ w·LDM)
	S1	S2	C3	C4	C5	C6	C7	C8	H9	H10	H11	H12	H13	H14	H15	H16	H17	H18
S1	14.6278	0.662058	0.52748	0.0390954	0.0400511	0.0118846	0.0217952	0.00970553	0.0284101	0.0274726	0.0059613	0.00749207	0.00568617	0.000939649	0.00167197	0.00147095	0.000901349	0.00128522
S2	0.662058	14.6348	0.0396919	0.525779	0.00994612	0.0404291	0.00765628	0.0223329	0.00727361	0.00754705	0.0279406	0.0278117	0.00173015	0.0061543	0.00206963	0.000339856	0.00161372	0.0013685
C3	0.52748	0.0396919	4.01069	0.00190295	0.51679	0.00150053	0.0365409	0.00106401	0.463436	0.463191	0.000668024	0.000417487	0.0196736	0.000301878	0.00626987	0.00631073	5.90818e-05	9.3953e-05
C4	0.0390954	0.525779	0.00190295	4.0116	0.00279843	0.517324	0.00224177	0.0368112	0.000516731	0.00048619	0.46061	0.464534	0.000393001	0.0197097	0.000119259	8.51132e-05	0.00630178	0.00630105
C5	0.0400511	0.00994612	0.51679	0.00279843	3.96748	0.00165554	0.915348	0.00118058	0.018819	0.0190815	0.00494191	0.000373207	0.471983	0.000810664	0.029992	0.030417	4.77396e-05	0.000432899
C6	0.0118846	0.0404291	0.00150053	0.517324	0.00165554	3.96632	0.00130435	0.91619	0.000892588	0.00139354	0.0184143	0.0192607	0.000726191	0.472263	0.000119178	0.000105356	0.0302248	0.0302262
C7	0.0217952	0.00765628	0.0365409	0.00224177	0.915348	0.00130435	4.08128	0.000525683	0.00737443	0.00826568	0.00427415	0.00022025	0.029073	0.00126696	0.480477	0.483945	4.98357e-05	0.000133061
C8	0.00970553	0.0223329	0.00106401	0.0368112	0.00118058	0.91619	0.000525683	4.08017	0.000742209	0.00116636	0.00704637	0.0084625	0.00122657	0.0290051	0.000127123	5.83461e-05	0.482975	0.481686
H9	0.0284101	0.00727361	0.463436	0.000516731	0.018819	0.000892588	0.00737443	0.000742209	0.395115	0.0146485	0.000331515	7.26314e-05	0.00374955	0.000117087	0.00274033	0.000655433	3.71487e-05	7.05626e-05
H10	0.0274726	0.00754705	0.463191	0.00048619	0.0190815	0.00139354	0.00826568	0.00116636	0.0146485	0.396071	0.000115071	0.000202666	0.00273414	0.000315161	0.00172248	0.000748124	7.17563e-05	3.75953e-05
H11	0.0059613	0.0279406	0.000668024	0.46061	0.00494191	0.0184143	0.00427415	0.00704637	0.000331515	0.000115071	0.388992	0.0145418	0.000577233	0.00410018	0.000129926	0.00023595	0.00128667	0.00245247
H12	0.00749207	0.0278117	0.000417487	0.464534	0.000373207	0.0192607	0.00022025	0.0084625	7.26314e-05	0.000202666	0.0145418	0.399214	0.000149508	0.00240442	2.28524e-05	1.19439e-05	0.000988897	0.00112393
H13	0.00568617	0.00173015	0.0196736	0.000393001	0.471983	0.000726191	0.029073	0.00122657	0.00374955	0.00273414	0.000577233	0.000149508	0.410547	0.000101474	0.00661995	0.00377707	5.93124e-05	0.000581763
H14	0.000939649	0.0061543	0.000301878	0.0197097	0.000810664	0.472263	0.00126696	0.0290051	0.000117087	0.000315161	0.00410018	0.00240442	0.000101474	0.410544	8.08699e-05	0.000160776	0.00456745	0.00582087
H15	0.00167197	0.00206963	0.00626987	0.000119259	0.029992	0.000119178	0.480477	0.000127123	0.00274033	0.00172248	0.000129926	2.28524e-05	0.00661995	8.08699e-05	0.410601	0.0168479	2.71169e-05	2.21029e-05
H16	0.00147095	0.000339856	0.00631073	8.51132e-05	0.030417	0.000105356	0.483945	5.83461e-05	0.000655433	0.000748124	0.00023595	1.19439e-05	0.00377707	0.000160776	0.0168479	0.412654	5.27171e-06	3.06577e-05
H17	0.000901349	0.00161372	5.90818e-05	0.00630178	4.77396e-05	0.0302248	4.98357e-05	0.482975	3.71487e-05	7.17563e-05	0.00128667	0.000988897	5.93124e-05	0.00456745	2.71169e-05	5.27171e-06	0.411903	0.0168858
H18	0.00128522	0.0013685	9.3953e-05	0.00630105	0.000432899	0.0302262	0.000133061	0.481686	7.05626e-05	3.75953e-05	0.00245247	0.00112393	0.000581763	0.00582087	2.21029e-05	3.06577e-05	0.0168858	0.413188

## Sheet: Weighted_LDM
Weighted LDM — diallyl_disufide_1_LIDI_matrix (× 0.37)
	S1	S2	C3	C4	C5	C6	C7	C8	H9	H10	H11	H12	H13	H14	H15	H16	H17	H18	Total
S1	5.40809	0.24518	0.195599	0.0142608	0.014745	0.00548453	0.00802449	0.00487274	0.0106537	0.00986233	0.00134009	0.00322857	0.00223265	0.000193664	0.000489849	0.000563209	0.000134373	0.000762443	28.8604
S2	0.24518	5.41584	0.0149267	0.194053	0.00340389	0.0150546	0.002875	0.00853595	0.00271191	0.00316665	0.0102792	0.010029	0.000189962	0.00249403	0.000963085	0.000109566	0.000579902	0.000484877
C3	0.195599	0.0149267	1.48391	0.000666232	0.191193	0.000252062	0.0133772	0.000129189	0.171478	0.171764	0.000235392	0.000108773	0.00731538	3.59105e-05	0.00232383	0.0023307	3.98373e-06	4.71553e-05
C4	0.0142608	0.194053	0.000666232	1.48521	0.00172106	0.191598	0.00152865	0.0136312	0.000109447	0.000164495	0.169386	0.171967	0.000125575	0.00734475	5.49317e-05	5.03566e-05	0.00232234	0.00232962
C5	0.014745	0.00340389	0.191193	0.00172106	1.46754	0.000122395	0.337752	0.000129857	0.00686644	0.00727072	0.00354564	0.000120546	0.174885	5.64741e-05	0.0110329	0.0112757	8.4465e-06	0.000349838
C6	0.00548453	0.0150546	0.000252062	0.191598	0.000122395	1.46683	0.000133899	0.339217	8.33424e-05	2.45632e-05	0.00662049	0.00719881	5.43845e-05	0.175099	1.36864e-05	6.90467e-06	0.0111971	0.0111842
C7	0.00802449	0.002875	0.0133772	0.00152865	0.337752	0.000133899	1.51042	3.01825e-05	0.00232151	0.00346802	0.00331624	7.30969e-05	0.0108127	6.7799e-05	0.177672	0.179145	2.29155e-06	8.06349e-05
C8	0.00487274	0.00853595	0.000129189	0.0136312	0.000129857	0.339217	3.01825e-05	1.50904	6.69269e-05	1.79545e-05	0.00227325	0.00337884	0.000279042	0.0107693	7.33355e-06	3.08067e-06	0.179122	0.177845
H9	0.0106537	0.00271191	0.171478	0.000109447	0.00686644	8.33424e-05	0.00232151	6.69269e-05	0.145727	0.00539579	2.28607e-05	6.85623e-06	0.00190455	3.83292e-06	0.00154237	0.000167448	3.15199e-06	2.50703e-05
H10	0.00986233	0.00316665	0.171764	0.000164495	0.00727072	2.45632e-05	0.00346802	1.79545e-05	0.00539579	0.147562	4.43432e-05	5.99796e-05	0.000544095	6.04625e-06	0.000183651	0.000299046	8.39285e-07	2.37558e-06
H11	0.00134009	0.0102792	0.000235392	0.169386	0.00354564	0.00662049	0.00331624	0.00227325	2.28607e-05	4.43432e-05	0.141355	0.00529862	0.000315865	0.0018049	8.8859e-05	0.00018617	0.000163359	0.00149085
H12	0.00322857	0.010029	0.000108773	0.171967	0.000120546	0.00719881	7.30969e-05	0.00337884	6.85623e-06	5.99796e-05	0.00529862	0.14829	8.60132e-06	0.000559902	3.02938e-06	3.54271e-06	0.000295422	0.000183136
H13	0.00223265	0.000189962	0.00731538	0.000125575	0.174885	5.43845e-05	0.0108127	0.000279042	0.00190455	0.000544095	0.000315865	8.60132e-06	0.152962	2.17447e-05	0.00250776	0.00135597	2.75385e-05	0.000452863
H14	0.000193664	0.00249403	3.59105e-05	0.00734475	5.64741e-05	0.175099	6.7799e-05	0.0107693	3.83292e-06	6.04625e-06	0.0018049	0.000559902	2.17447e-05	0.152641	2.86948e-06	3.52835e-06	0.0013468	0.00250238
H15	0.000489849	0.000963085	0.00232383	5.49317e-05	0.0110329	1.36864e-05	0.177672	7.33355e-06	0.00154237	0.000183651	8.8859e-05	3.02938e-06	0.00250776	2.86948e-06	0.15129	0.00621841	5.61912e-07	1.29081e-05
H16	0.000563209	0.000109566	0.0023307	5.03566e-05	0.0112757	6.90467e-06	0.179145	3.08067e-06	0.000167448	0.000299046	0.00018617	3.54271e-06	0.00135597	3.52835e-06	0.00621841	0.152723	2.9529e-07	7.88093e-06
H17	0.000134373	0.000579902	3.98373e-06	0.00232234	8.4465e-06	0.0111971	2.29155e-06	0.179122	3.15199e-06	8.39285e-07	0.000163359	0.000295422	2.75385e-05	0.0013468	5.61912e-07	2.9529e-07	0.152551	0.00626083
H18	0.000762443	0.000484877	4.71553e-05	0.00232962	0.000349838	0.0111842	8.06349e-05	0.177845	2.50703e-05	2.37558e-06	0.00149085	0.000183136	0.000452863	0.00250238	1.29081e-05	7.88093e-06	0.00626083	0.15356
Weighted LDM — diallyl_disufide_2_LIDI_matrix (× 0.13)
	S1	S2	C3	C4	C5	C6	C7	C8	H9	H10	H11	H12	H13	H14	H15	H16	H17	H18	Total
S1	1.90303	0.0862392	0.0686099	0.00501927	0.00486773	0.00132478	0.00276315	0.00106335	0.003837	0.00360344	0.000760834	0.00107987	0.000715743	7.71487e-05	0.000167635	0.000201668	0.000239164	3.62478e-05	10.1401
S2	0.0862392	1.90302	0.00501762	0.0686273	0.00132381	0.00486638	0.00106449	0.0027623	0.000759933	0.00108	0.00383488	0.00360326	7.71496e-05	0.000715728	0.000239026	3.62595e-05	0.000167543	0.000201645
C3	0.0686099	0.00501762	0.521081	0.000292093	0.0673353	0.000109742	0.00481986	6.60722e-05	0.0602962	0.0602113	4.78426e-05	7.75127e-05	0.00253078	2.79348e-05	0.000833451	0.000819299	8.63508e-06	8.89972e-06
C4	0.00501927	0.0686273	0.000292093	0.521128	0.000109163	0.0673413	6.56408e-05	0.00482133	4.78914e-05	7.75112e-05	0.0603021	0.0602211	2.79303e-05	0.00253328	8.63478e-06	8.89112e-06	0.000834403	0.000819536
C5	0.00486773	0.00132381	0.0673353	0.000109163	0.514517	0.00124848	0.118534	0.000881767	0.00241075	0.00253665	1.46071e-05	1.76731e-05	0.0609666	0.000523998	0.00390334	0.00394472	2.21362e-05	7.08292e-05
C6	0.00132478	0.00486638	0.000109742	0.0673413	0.00124848	0.514527	0.000880266	0.118543	1.46512e-05	1.76446e-05	0.00241273	0.00253664	0.000525479	0.0609672	2.21281e-05	7.10015e-05	0.0039057	0.00394617
C7	0.00276315	0.00106449	0.00481986	6.56408e-05	0.118534	0.000880266	0.530349	0.000334389	0.00084565	0.0012494	2.03827e-05	5.7418e-06	0.00365451	0.000854606	0.0625018	0.062914	2.01276e-05	3.65016e-05
C8	0.00106335	0.0027623	6.60722e-05	0.00482133	0.000881767	0.118543	0.000334389	0.530354	2.03934e-05	5.73988e-06	0.000845737	0.00124935	0.000855978	0.00365487	2.01349e-05	3.64925e-05	0.0625025	0.0629152
H9	0.003837	0.000759933	0.0602962	4.78914e-05	0.00241075	1.46512e-05	0.00084565	2.03934e-05	0.0514986	0.0019179	1.77446e-05	3.95228e-06	0.00066538	1.87277e-06	0.00057239	6.13879e-05	4.0725e-06	3.17913e-06
H10	0.00360344	0.00108	0.0602113	7.75112e-05	0.00253665	1.76446e-05	0.0012494	5.73988e-06	0.0019179	0.0516948	3.94771e-06	3.3691e-05	0.000175336	1.23377e-05	6.51967e-05	0.000103987	4.52577e-07	5.29679e-07
H11	0.000760834	0.00383488	4.78426e-05	0.0603021	1.46071e-05	0.00241273	2.03827e-05	0.000845737	1.77446e-05	3.94771e-06	0.0514969	0.00191783	1.87615e-06	0.000665366	4.06878e-06	3.1791e-06	0.000572325	6.13834e-05
H12	0.00107987	0.00360326	7.75127e-05	0.0602211	1.76731e-05	0.00253664	5.7418e-06	0.00124935	3.95228e-06	3.3691e-05	0.00191783	0.0516943	1.23518e-05	0.000175359	4.52985e-07	5.29591e-07	6.51953e-05	0.00010399
H13	0.000715743	7.71496e-05	0.00253078	2.79303e-05	0.0609666	0.000525479	0.00365451	0.000855978	0.00066538	0.000175336	1.87615e-06	1.23518e-05	0.0525395	2.91605e-05	0.000867407	0.000468502	2.42536e-05	0.000124496
H14	7.71487e-05	0.000715728	2.79348e-05	0.00253328	0.000523998	0.0609672	0.000854606	0.00365487	1.87277e-06	1.23377e-05	0.000665366	0.000175359	2.91605e-05	0.0525415	2.41822e-05	0.000124309	0.000867408	0.000468417
H15	0.000167635	0.000239026	0.000833451	8.63478e-06	0.00390334	2.21281e-05	0.0625018	2.01349e-05	0.00057239	6.51967e-05	4.06878e-06	4.52985e-07	0.000867407	2.41822e-05	0.053602	0.00220633	9.32025e-07	2.96256e-06
H16	0.000201668	3.62595e-05	0.000819299	8.89112e-06	0.00394472	7.10015e-05	0.062914	3.64925e-05	6.13879e-05	0.000103987	3.1791e-06	5.29591e-07	0.000468502	0.000124309	0.00220633	0.0539181	2.96338e-06	2.06412e-05
H17	0.000239164	0.000167543	8.63508e-06	0.000834403	2.21362e-05	0.0039057	2.01276e-05	0.0625025	4.0725e-06	4.52577e-07	0.000572325	6.51953e-05	2.42536e-05	0.000867408	9.32025e-07	2.96338e-06	0.0536013	0.00220633
H18	3.62478e-05	0.000201645	8.89972e-06	0.000819536	7.08292e-05	0.00394617	3.65016e-05	0.0629152	3.17913e-06	5.29679e-07	6.13834e-05	0.00010399	0.000124496	0.000468417	2.96256e-06	2.06412e-05	0.00220633	0.0539185
Weighted LDM — diallyl_disufide_3_LIDI_matrix (× 0.12)
	S1	S2	C3	C4	C5	C6	C7	C8	H9	H10	H11	H12	H13	H14	H15	H16	H17	H18	Total
S1	1.75756	0.0793714	0.0632632	0.00466698	0.00480337	0.00107591	0.00273058	0.000629864	0.0031641	0.00350451	0.00114655	0.000356747	0.000693561	5.72727e-05	0.000164124	0.000182222	5.94233e-05	2.90793e-05	9.36004
S2	0.0793714	1.75534	0.00485106	0.0627239	0.00128223	0.00524645	0.00119489	0.00258589	0.00102553	0.000851771	0.00317295	0.00357336	7.27333e-05	0.000724647	0.00042593	4.02527e-05	0.000134275	0.000155191
C3	0.0632632	0.00485106	0.481196	0.000214543	0.0620757	4.60664e-05	0.00432116	1.98721e-05	0.0557805	0.0556043	8.56794e-05	4.80627e-05	0.00238262	1.44904e-05	0.00074883	0.000753707	1.77731e-06	2.17625e-06
C4	0.00466698	0.0627239	0.000214543	0.481449	0.000608138	0.061989	0.000476173	0.0044918	4.9193e-05	4.14555e-05	0.0547875	0.0560118	6.57906e-05	0.00233293	2.48098e-05	1.52706e-05	0.000764137	0.000757715
C5	0.00480337	0.00128223	0.0620757	0.000608138	0.475932	6.58901e-05	0.109305	2.80827e-05	0.00234133	0.00222843	0.00116464	3.45464e-05	0.0567789	0.00010779	0.00355521	0.00364794	3.61986e-06	3.6014e-06
C6	0.00107591	0.00524645	4.60664e-05	0.061989	6.58901e-05	0.477123	0.000152932	0.110425	1.64983e-05	5.09011e-06	0.00221616	0.00224523	6.2235e-06	0.0566629	1.85014e-05	1.30313e-05	0.00362996	0.00363149
C7	0.00273058	0.00119489	0.00432116	0.000476173	0.109305	0.000152932	0.489709	2.76322e-05	0.00106162	0.000748869	0.000825072	4.98814e-05	0.0035097	0.000280578	0.0575624	0.0580851	3.40627e-06	9.22045e-06
C8	0.000629864	0.00258589	1.98721e-05	0.0044918	2.80827e-05	0.110425	2.76322e-05	0.490057	1.17319e-05	1.07753e-06	0.00108309	0.000763708	7.22549e-06	0.00350251	2.94398e-06	2.97535e-06	0.0580712	0.0577325
H9	0.0031641	0.00102553	0.0557805	4.9193e-05	0.00234133	1.64983e-05	0.00106162	1.17319e-05	0.0478956	0.00175237	1.23201e-05	8.66527e-06	0.000193785	3.96893e-06	5.88643e-05	9.8337e-05	1.03227e-06	6.59206e-07
H10	0.00350451	0.000851771	0.0556043	4.14555e-05	0.00222843	5.09011e-06	0.000748869	1.07753e-06	0.00175237	0.0472164	1.5541e-05	1.46284e-05	0.000613486	1.83516e-06	0.000487012	5.35084e-05	1.75563e-07	2.23651e-07
H11	0.00114655	0.00317295	8.56794e-05	0.0547875	0.00116464	0.00221616	0.000825072	0.00108309	1.23201e-05	1.5541e-05	0.0453482	0.00172781	0.00017642	0.000197942	2.1545e-05	4.02816e-05	9.2599e-05	6.10995e-05
H12	0.000356747	0.00357336	4.80627e-05	0.0560118	3.45464e-05	0.00224523	4.98814e-05	0.000763708	8.66527e-06	1.46284e-05	0.00172781	0.0483059	3.18318e-06	0.000615148	1.00738e-05	1.87918e-06	5.55544e-05	0.00048394
H13	0.000693561	7.27333e-05	0.00238262	6.57906e-05	0.0567789	6.2235e-06	0.0035097	7.22549e-06	0.000193785	0.000613486	0.00017642	3.18318e-06	0.0496514	4.05035e-06	0.000813273	0.000439609	4.78896e-07	3.32496e-07
H14	5.72727e-05	0.000724647	1.44904e-05	0.00233293	0.00010779	0.0566629	0.000280578	0.00350251	3.96893e-06	1.83516e-06	0.000197942	0.000615148	4.05035e-06	0.0490689	4.61178e-05	2.95717e-05	0.000435158	0.000808275
H15	0.000164124	0.00042593	0.00074883	2.48098e-05	0.00355521	1.85014e-05	0.0575624	2.94398e-06	5.88643e-05	0.000487012	2.1545e-05	1.00738e-05	0.000813273	4.61178e-05	0.0489383	0.00201384	4.03509e-07	1.58187e-06
H16	0.000182222	4.02527e-05	0.000753707	1.52706e-05	0.00364794	1.30313e-05	0.0580851	2.97535e-06	9.8337e-05	5.35084e-05	4.02816e-05	1.87918e-06	0.000439609	2.95717e-05	0.00201384	0.0494667	3.36715e-07	9.04865e-07
H17	5.94233e-05	0.000134275	1.77731e-06	0.000764137	3.61986e-06	0.00362996	3.40627e-06	0.0580712	1.03227e-06	1.75563e-07	9.2599e-05	5.55544e-05	4.78896e-07	0.000435158	4.03509e-07	3.36715e-07	0.0493006	0.00202318
H18	2.90793e-05	0.000155191	2.17625e-06	0.000757715	3.6014e-06	0.00363149	9.22045e-06	0.0577325	6.59206e-07	2.23651e-07	6.10995e-05	0.00048394	3.32496e-07	0.000808275	1.58187e-06	9.04865e-07	0.00202318	0.0494262
Weighted LDM — diallyl_disufide_4_LIDI_matrix (× 0.1)
	S1	S2	C3	C4	C5	C6	C7	C8	H9	H10	H11	H12	H13	H14	H15	H16	H17	H18	Total
S1	1.46331	0.066119	0.05237	0.00400976	0.00427439	0.000980772	0.00210389	0.000824906	0.00288012	0.00280811	0.000685268	0.000857803	0.000598729	5.28649e-05	0.000122474	0.000110262	3.12836e-05	0.000269225	7.80003
S2	0.066119	1.46458	0.00390473	0.0528533	0.000900859	0.00399482	0.000510098	0.00220295	0.00106296	0.000262987	0.00292194	0.0026655	3.3981e-05	0.000634762	2.47366e-05	4.8743e-05	0.00015304	0.000134376
C3	0.05237	0.00390473	0.401307	0.000174389	0.0516212	0.00046208	0.00374438	0.000410994	0.0463517	0.0459567	3.28472e-05	3.79753e-05	0.00195898	4.76789e-05	0.0006314	0.000634576	1.51114e-05	1.46076e-05
C4	0.00400976	0.0528533	0.000174389	0.401041	5.10401e-05	0.0517013	2.72136e-05	0.00362602	3.69003e-05	5.57014e-05	0.0463388	0.0464251	1.09039e-05	0.00198315	2.46097e-06	2.00706e-06	0.000629975	0.00062989
C5	0.00427439	0.000900859	0.0516212	5.10401e-05	0.397718	4.42523e-05	0.0920884	3.5701e-05	0.00189853	0.00177711	4.4069e-06	2.18262e-05	0.0473387	4.97361e-06	0.00302809	0.00302254	2.12204e-06	1.97931e-06
C6	0.000980772	0.00399482	0.00046208	0.0517013	4.42523e-05	0.396586	9.27455e-06	0.0912622	2.46544e-05	0.000888542	0.00185446	0.00195636	1.59587e-05	0.0473063	1.15643e-05	9.89271e-07	0.00304823	0.00297576
C7	0.00210389	0.000510098	0.00374438	2.72136e-05	0.0920884	9.27455e-06	0.408242	1.52102e-05	0.000915059	0.000632685	2.29121e-06	1.68665e-05	0.00294598	1.89298e-06	0.0481012	0.0483824	3.0486e-06	1.74944e-06
C8	0.000824906	0.00220295	0.000410994	0.00362602	3.5701e-05	0.0912622	1.52102e-05	0.408137	2.14115e-05	0.000884554	0.000630392	0.00092484	1.71408e-05	0.00291612	2.71987e-05	1.88608e-06	0.0484165	0.0480007
H9	0.00288012	0.00106296	0.0463517	3.69003e-05	0.00189853	2.46544e-05	0.000915059	2.14115e-05	0.039261	0.0014634	1.8659e-05	2.06725e-06	0.000165329	9.31734e-06	5.30549e-05	8.12723e-05	1.4549e-06	2.90912e-06
H10	0.00280811	0.000262987	0.0459567	5.57014e-05	0.00177711	0.000888542	0.000632685	0.000884554	0.0014634	0.038691	7.2947e-06	1.04309e-05	0.000480405	8.11922e-05	0.000396053	4.57152e-05	5.41747e-05	2.42458e-05
H11	0.000685268	0.00292194	3.28472e-05	0.0463388	4.4069e-06	0.00185446	2.29121e-06	0.000630392	1.8659e-05	7.2947e-06	0.0393754	0.00146018	6.00849e-07	0.0005174	2.45031e-07	2.03426e-07	4.54814e-05	0.000418532
H12	0.000857803	0.0026655	3.79753e-05	0.0464251	2.18262e-05	0.00195636	1.68665e-05	0.00092484	2.06725e-06	1.04309e-05	0.00146018	0.0398729	2.4384e-06	0.000148543	9.78768e-07	1.14872e-06	8.08034e-05	4.94948e-05
H13	0.000598729	3.3981e-05	0.00195898	1.09039e-05	0.0473387	1.59587e-05	0.00294598	1.71408e-05	0.000165329	0.000480405	6.00849e-07	2.4384e-06	0.0409698	1.28517e-06	0.000677356	0.000363955	1.4163e-06	6.1919e-07
H14	5.28649e-05	0.000634762	4.76789e-05	0.00198315	4.97361e-06	0.0473063	1.89298e-06	0.00291612	9.31734e-06	8.11922e-05	0.0005174	0.000148543	1.28517e-06	0.0413166	5.71756e-07	1.30825e-07	0.00036628	0.000677377
H15	0.000122474	2.47366e-05	0.0006314	2.46097e-06	0.00302809	1.15643e-05	0.0481012	2.71987e-05	5.30549e-05	0.000396053	2.45031e-07	9.78768e-07	0.000677356	5.71756e-07	0.0412531	0.00168638	6.23665e-06	2.12757e-06
H16	0.000110262	4.8743e-05	0.000634576	2.00706e-06	0.00302254	9.89271e-07	0.0483824	1.88608e-06	8.12723e-05	4.57152e-05	2.03426e-07	1.14872e-06	0.000363955	1.30825e-07	0.00168638	0.041044	4.83832e-07	1.60096e-07
H17	3.12836e-05	0.00015304	1.51114e-05	0.000629975	2.12204e-06	0.00304823	3.0486e-06	0.0484165	1.4549e-06	5.41747e-05	4.54814e-05	8.08034e-05	1.4163e-06	0.00036628	6.23665e-06	4.83832e-07	0.0413102	0.00168085
H18	0.000269225	0.000134376	1.46076e-05	0.00062989	1.97931e-06	0.00297576	1.74944e-06	0.0480007	2.90912e-06	2.42458e-05	0.000418532	4.94948e-05	6.1919e-07	0.000677377	2.12757e-06	1.60096e-07	0.00168085	0.0408343
Weighted LDM — diallyl_disufide_5_LIDI_matrix (× 0.07)
	S1	S2	C3	C4	C5	C6	C7	C8	H9	H10	H11	H12	H13	H14	H15	H16	H17	H18	Total
S1	1.02412	0.0462951	0.0368888	0.0028222	0.00295383	0.000673294	0.00148098	0.000606173	0.00199654	0.00181532	0.000602455	0.000495116	0.000267257	3.94739e-05	6.82897e-05	0.000106391	0.000202971	2.1538e-05	5.46
S2	0.0462951	1.02457	0.00268785	0.036933	0.000590409	0.00278879	0.000125936	0.00154552	0.000390292	0.000599955	0.00186461	0.00203242	0.000800756	0.000432899	3.15997e-05	1.40569e-05	9.32757e-05	0.000106276
C3	0.0368888	0.00268785	0.281032	0.000123275	0.0361309	0.000337091	0.00259144	0.000282226	0.031976	0.0325117	3.05867e-05	2.05417e-05	0.00134484	3.19437e-05	0.000446095	0.000443935	1.14738e-05	8.94622e-06
C4	0.0028222	0.036933	0.000123275	0.280749	3.72897e-05	0.0362061	1.2319e-05	0.00253498	4.97739e-05	1.77273e-05	0.0325051	0.0324333	2.87443e-05	0.00138921	1.92786e-06	1.75706e-06	0.000439701	0.000440353
C5	0.00295383	0.000590409	0.0361309	3.72897e-05	0.278025	2.18069e-05	0.0646647	2.82963e-05	0.00130811	0.00128778	4.7062e-06	1.16141e-05	0.0328884	2.96819e-06	0.00215261	0.00213674	3.28476e-06	1.29323e-06
C6	0.000673294	0.00278879	0.000337091	0.0362061	2.18069e-05	0.277712	1.91544e-05	0.0638731	0.000714523	2.06718e-05	0.00136832	0.00130099	6.7097e-06	0.0331203	1.16649e-06	1.77544e-06	0.00208492	0.00212856
C7	0.00148098	0.000125936	0.00259144	1.2319e-05	0.0646647	1.91544e-05	0.285923	1.86286e-05	0.000630954	0.000457224	2.71443e-06	4.12829e-06	0.00202502	1.42267e-06	0.0337454	0.0338946	1.49325e-06	8.18896e-07
C8	0.000606173	0.00154552	0.000282226	0.00253498	2.82963e-05	0.0638731	1.86286e-05	0.285678	0.00059727	1.20653e-05	0.000644703	0.000438976	1.68919e-06	0.00204595	1.01555e-06	2.30983e-06	0.0335989	0.0338845
H9	0.00199654	0.000390292	0.031976	4.97739e-05	0.00130811	0.000714523	0.000630954	0.00059727	0.0264545	0.000997241	8.31922e-06	6.24996e-06	7.53123e-05	8.18045e-05	3.03488e-05	5.10876e-05	1.5641e-05	3.18658e-05
H10	0.00181532	0.000599955	0.0325117	1.77273e-05	0.00128778	2.06718e-05	0.000457224	1.20653e-05	0.000997241	0.0281204	9.42456e-06	1.12152e-06	0.000361459	2.0504e-06	0.000304985	3.46571e-05	6.5732e-07	6.96966e-07
H11	0.000602455	0.00186461	3.05867e-05	0.0325051	4.7062e-06	0.00136832	2.71443e-06	0.000644703	8.31922e-06	9.42456e-06	0.0278976	0.0010205	1.21089e-06	0.000106187	2.91105e-07	4.14121e-07	3.46804e-05	5.67781e-05
H12	0.000495116	0.00203242	2.05417e-05	0.0324333	1.16141e-05	0.00130099	4.12829e-06	0.000438976	6.24996e-06	1.12152e-06	0.0010205	0.027537	1.19584e-05	0.000361005	5.16619e-07	5.05229e-07	0.000290439	3.16037e-05
H13	0.000267257	0.000800756	0.00134484	2.87443e-05	0.0328884	6.7097e-06	0.00202502	1.68919e-06	7.53123e-05	0.000361459	1.21089e-06	1.19584e-05	0.0282879	3.45818e-06	0.000466352	0.000254023	3.78612e-07	1.36042e-07
H14	3.94739e-05	0.000432899	3.19437e-05	0.00138921	2.96819e-06	0.0331203	1.42267e-06	0.00204595	8.18045e-05	2.0504e-06	0.000106187	0.000361005	3.45818e-06	0.0289444	1.69506e-07	1.39303e-07	0.00047473	0.00025622
H15	6.82897e-05	3.15997e-05	0.000446095	1.92786e-06	0.00215261	1.16649e-06	0.0337454	1.01555e-06	3.03488e-05	0.000304985	2.91105e-07	5.16619e-07	0.000466352	1.69506e-07	0.0292737	0.0011966	8.11368e-08	4.55925e-08
H16	0.000106391	1.40569e-05	0.000443935	1.75706e-06	0.00213674	1.77544e-06	0.0338946	2.30983e-06	5.10876e-05	3.46571e-05	4.14121e-07	5.05229e-07	0.000254023	1.39303e-07	0.0011966	0.02889	1.72109e-07	8.18557e-08
H17	0.000202971	9.32757e-05	1.14738e-05	0.000439701	3.28476e-06	0.00208492	1.49325e-06	0.0335989	1.5641e-05	6.5732e-07	3.46804e-05	0.000290439	3.78612e-07	0.00047473	8.11368e-08	1.72109e-07	0.0285853	0.00117322
H18	2.1538e-05	0.000106276	8.94622e-06	0.000440353	1.29323e-06	0.00212856	8.18896e-07	0.0338845	3.18658e-05	6.96966e-07	5.67781e-05	3.16037e-05	1.36042e-07	0.00025622	4.55925e-08	8.18557e-08	0.00117322	0.0288356
Weighted LDM — diallyl_disufide_6_LIDI_matrix (× 0.06)
	S1	S2	C3	C4	C5	C6	C7	C8	H9	H10	H11	H12	H13	H14	H15	H16	H17	H18	Total
S1	0.876967	0.0397171	0.0315837	0.0023889	0.00243604	0.000875983	0.00138074	0.00080073	0.00173922	0.00160255	0.000250535	0.000532361	0.000397427	3.11258e-05	8.07424e-05	9.31265e-05	0.00014874	2.22616e-05	4.68
S2	0.0397171	0.876956	0.00238527	0.0315745	0.000879308	0.00243181	0.000800473	0.0013793	0.000249916	0.000532314	0.00173769	0.00160168	3.11009e-05	0.000397312	0.000148833	2.22683e-05	8.0661e-05	9.30969e-05
C3	0.0315837	0.00238527	0.240472	0.000140561	0.0310373	3.65352e-05	0.00220447	1.85945e-05	0.0278436	0.0278671	0.000135731	1.82026e-05	0.00119215	7.67737e-06	0.000382435	0.000376896	9.05998e-06	6.47217e-07
C4	0.0023889	0.0315745	0.000140561	0.240453	3.6702e-05	0.0310402	1.86063e-05	0.00220515	0.000135674	1.81758e-05	0.0278425	0.0278603	7.68307e-06	0.00119062	9.06075e-06	6.48439e-07	0.000381904	0.000376798
C5	0.00243604	0.000879308	0.0310373	3.6702e-05	0.237871	1.94794e-05	0.0550211	1.29321e-05	0.00112101	0.0011581	1.24352e-05	2.3066e-06	0.0283838	1.51186e-06	0.0018138	0.0018149	1.68498e-06	5.72282e-07
C6	0.000875983	0.00243181	3.65352e-05	0.0310402	1.94794e-05	0.237873	1.28834e-05	0.0550229	1.24265e-05	2.30213e-06	0.00112368	0.0011583	1.50778e-06	0.0283847	1.68259e-06	5.68808e-07	0.00181603	0.00181538
C7	0.00138074	0.000800473	0.00220447	1.86063e-05	0.0550211	1.28834e-05	0.244649	9.43645e-06	0.000382562	0.00054337	9.70743e-06	2.15441e-06	0.00174021	1.09523e-06	0.0288618	0.0290364	6.17261e-07	4.32924e-07
C8	0.00080073	0.0013793	1.85945e-05	0.00220515	1.29321e-05	0.0550229	9.43645e-06	0.24465	9.71155e-06	2.15521e-06	0.000382785	0.000543378	1.09568e-06	0.00174013	6.17385e-07	4.33011e-07	0.0288622	0.0290363
H9	0.00173922	0.000249916	0.0278436	0.000135674	0.00112101	1.24265e-05	0.000382562	9.71155e-06	0.0242067	0.000900025	0.000189832	1.41336e-05	0.000309663	6.25313e-06	0.000257371	2.79243e-05	1.03477e-05	8.41096e-07
H10	0.00160255	0.000532314	0.0278671	1.81758e-05	0.0011581	2.30213e-06	0.00054337	2.15521e-06	0.000900025	0.0239398	1.41361e-05	5.99448e-06	9.0291e-05	1.05899e-06	3.0226e-05	4.76402e-05	7.71551e-07	1.18392e-07
H11	0.000250535	0.00173769	0.000135731	0.0278425	1.24352e-05	0.00112368	9.70743e-06	0.000382785	0.000189832	1.41361e-05	0.0242072	0.000900019	6.25766e-06	0.000309673	1.03441e-05	8.40825e-07	0.00025748	2.79398e-05
H12	0.000532361	0.00160168	1.82026e-05	0.0278603	2.3066e-06	0.0011583	2.15441e-06	0.000543378	1.41336e-05	5.99448e-06	0.000900019	0.0239395	1.059e-06	9.02901e-05	7.71388e-07	1.18379e-07	3.02265e-05	4.76391e-05
H13	0.000397427	3.11009e-05	0.00119215	7.68307e-06	0.0283838	1.50778e-06	0.00174021	1.09568e-06	0.000309663	9.0291e-05	6.25766e-06	1.059e-06	0.0246948	1.34366e-07	0.000407744	0.000218556	7.13388e-07	3.72891e-08
H14	3.11258e-05	0.000397312	7.67737e-06	0.00119062	1.51186e-06	0.0283847	1.09523e-06	0.00174013	6.25313e-06	1.05899e-06	0.000309673	9.02901e-05	1.34366e-07	0.0246947	7.1326e-07	3.7289e-08	0.000407746	0.000218556
H15	8.07424e-05	0.000148833	0.000382435	9.06075e-06	0.0018138	1.68259e-06	0.0288618	6.17385e-07	0.000257371	3.0226e-05	1.03441e-05	7.71388e-07	0.000407744	7.1326e-07	0.0249425	0.00101581	1.46271e-07	2.92274e-08
H16	9.31265e-05	2.22683e-05	0.000376896	6.48439e-07	0.0018149	5.68808e-07	0.0290364	4.33011e-07	2.79243e-05	4.76402e-05	8.40825e-07	1.18379e-07	0.000218556	3.7289e-08	0.00101581	0.0246921	2.92333e-08	1.45611e-08
H17	0.00014874	8.0661e-05	9.05998e-06	0.000381904	1.68498e-06	0.00181603	6.17261e-07	0.0288622	1.03477e-05	7.71551e-07	0.00025748	3.02265e-05	7.13388e-07	0.000407746	1.46271e-07	2.92333e-08	0.0249427	0.00101582
H18	2.22616e-05	9.30969e-05	6.47217e-07	0.000376798	5.72282e-07	0.00181538	4.32924e-07	0.0290363	8.41096e-07	1.18392e-07	2.79398e-05	4.76391e-05	3.72891e-08	0.000218556	2.92274e-08	1.45611e-08	0.00101582	0.0246918
Weighted LDM — diallyl_disufide_7_LIDI_matrix (× 0.03)
	S1	S2	C3	C4	C5	C6	C7	C8	H9	H10	H11	H12	H13	H14	H15	H16	H17	H18	Total
S1	0.439378	0.0199042	0.0157097	0.0011826	0.00122533	0.000242069	0.000717316	5.55922e-05	0.00080584	0.000846678	0.000256702	0.000192778	0.000184116	0.000247512	3.87909e-05	4.66852e-05	4.97557e-06	1.07798e-05	2.34001
S2	0.0199042	0.438309	0.00116981	0.0158546	0.000450676	0.00118621	0.000432758	0.000682285	0.000260717	0.000107905	0.000779006	0.000903438	1.49477e-05	6.12227e-05	8.34838e-05	1.19318e-05	4.44808e-05	3.33102e-05
C3	0.0157097	0.00116981	0.120275	5.32225e-05	0.0155283	0.000108308	0.00110576	3.14421e-05	0.0139555	0.0138001	1.23205e-05	9.83107e-06	0.000597392	0.000108788	0.000186147	0.00018863	1.74139e-06	2.54404e-06
C4	0.0011826	0.0158546	5.32225e-05	0.12031	2.11823e-05	0.0154672	1.1759e-05	0.00108896	8.83743e-06	2.05125e-05	0.0139211	0.0139482	2.74116e-06	0.000576145	3.17281e-06	3.26234e-07	0.000189636	0.000185995
C5	0.00122533	0.000450676	0.0155283	2.11823e-05	0.118988	8.90352e-06	0.0274857	4.96825e-06	0.000577972	0.000550638	1.77084e-06	7.18936e-06	0.01421	9.50367e-06	0.00089311	0.000909479	2.86334e-07	2.82469e-07
C6	0.000242069	0.00118621	0.000108308	0.0154672	8.90352e-06	0.119033	1.59938e-05	0.0276071	8.27771e-06	0.000222664	0.000551986	0.000588459	4.21166e-06	0.0140603	4.08314e-05	1.34719e-06	0.00091567	0.00091035
C7	0.000717316	0.000432758	0.00110576	1.1759e-05	0.0274857	1.59938e-05	0.122302	1.73511e-05	0.000260196	0.000190457	1.34589e-06	6.16118e-06	0.000872963	1.91892e-06	0.0143762	0.0145229	5.25288e-07	2.79951e-07
C8	5.55922e-05	0.000682285	3.14421e-05	0.00108896	4.96825e-06	0.0276071	1.73511e-05	0.122529	2.03426e-06	7.09376e-05	0.000195823	0.000247551	3.20151e-06	0.000878835	4.56587e-05	1.89699e-06	0.0145252	0.014445
H9	0.00080584	0.000260717	0.0139555	8.83743e-06	0.000577972	8.27771e-06	0.000260196	2.03426e-06	0.0120298	0.000438617	4.64341e-06	6.4538e-07	4.91567e-05	4.8161e-06	1.46593e-05	2.42014e-05	1.49748e-07	2.57691e-07
H10	0.000846678	0.000107905	0.0138001	2.05125e-05	0.000550638	0.000222664	0.000190457	7.09376e-05	0.000438617	0.0117746	4.17519e-06	1.83606e-06	0.000146973	0.000182988	0.000120406	1.34704e-05	3.64154e-06	4.31037e-06
H11	0.000256702	0.000779006	1.23205e-05	0.0139211	1.77084e-06	0.000551986	1.34589e-06	0.000195823	4.64341e-06	4.17519e-06	0.0120053	0.000441401	4.71698e-07	0.000147918	2.07349e-07	6.36573e-08	1.4464e-05	0.000121214
H12	0.000192778	0.000903438	9.83107e-06	0.0139482	7.18936e-06	0.000588459	6.16118e-06	0.000247551	6.4538e-07	1.83606e-06	0.000441401	0.0118247	2.69615e-07	4.79701e-05	1.667e-06	2.37669e-07	2.45493e-05	1.36736e-05
H13	0.000184116	1.49477e-05	0.000597392	2.74116e-06	0.01421	4.21166e-06	0.000872963	3.20151e-06	4.91567e-05	0.000146973	4.71698e-07	2.69615e-07	0.0123936	4.23055e-06	0.000200439	0.000109012	1.78883e-07	1.40908e-07
H14	0.000247512	6.12227e-05	0.000108788	0.000576145	9.50367e-06	0.0140603	1.91892e-06	0.000878835	4.8161e-06	0.000182988	0.000147918	4.79701e-05	4.23055e-06	0.0122247	2.12959e-06	8.85684e-08	0.000109914	0.000200175
H15	3.87909e-05	8.34838e-05	0.000186147	3.17281e-06	0.00089311	4.08314e-05	0.0143762	4.56587e-05	1.46593e-05	0.000120406	2.07349e-07	1.667e-06	0.000200439	2.12959e-06	0.0122451	0.000501346	2.30126e-06	1.23654e-06
H16	4.66852e-05	1.19318e-05	0.00018863	3.26234e-07	0.000909479	1.34719e-06	0.0145229	1.89699e-06	2.42014e-05	1.34704e-05	6.36573e-08	2.37669e-07	0.000109012	8.85684e-08	0.000501346	0.0123748	7.05862e-08	1.73896e-08
H17	4.97557e-06	4.44808e-05	1.74139e-06	0.000189636	2.86334e-07	0.00091567	5.25288e-07	0.0145252	1.49748e-07	3.64154e-06	1.4464e-05	2.45493e-05	1.78883e-07	0.000109914	2.30126e-06	7.05862e-08	0.0123624	0.000509179
H18	1.07798e-05	3.33102e-05	2.54404e-06	0.000185995	2.82469e-07	0.00091035	2.79951e-07	0.014445	2.57691e-07	4.31037e-06	0.000121214	1.36736e-05	1.40908e-07	0.000200175	1.23654e-06	1.73896e-08	0.000509179	0.0124346
Weighted LDM — diallyl_disufide_8_LIDI_matrix (× 0.02)
	S1	S2	C3	C4	C5	C6	C7	C8	H9	H10	H11	H12	H13	H14	H15	H16	H17	H18	Total
S1	0.292122	0.0131217	0.0107308	0.000795314	0.000665944	0.00019668	0.000396169	0.000180935	0.000536085	0.000562915	0.00017003	0.000144579	0.000167654	1.14886e-05	0.000420181	3.22444e-05	6.2678e-06	6.23846e-05	1.56001
S2	0.0131217	0.292677	0.000781401	0.010564	0.000172262	0.000801868	0.000173134	0.000445846	0.000176731	0.000126649	0.000534019	0.000579126	1.41519e-05	0.000122571	8.49825e-05	5.32005e-06	3.05242e-05	2.69537e-05
C3	0.0107308	0.000781401	0.080457	3.63299e-05	0.0102478	9.49004e-05	0.000691079	8.01519e-05	0.00925887	0.00912057	9.2168e-06	6.07175e-06	0.000410833	8.94555e-06	8.84294e-05	0.00012972	2.51057e-06	3.4444e-06
C4	0.000795314	0.010564	3.63299e-05	0.0801944	1.30869e-05	0.0103414	9.07526e-06	0.000723662	4.96194e-06	1.34084e-05	0.00928794	0.00926806	1.77995e-06	0.000396875	8.16499e-06	3.02272e-07	0.000125942	0.000125535
C5	0.000665944	0.000172262	0.0102478	1.30869e-05	0.0797693	6.43201e-06	0.0185561	8.52451e-06	0.000404879	0.000382595	1.88735e-06	3.36063e-06	0.00948575	7.62297e-07	0.000586061	0.000628984	3.67029e-07	9.67896e-07
C6	0.00019668	0.000801868	9.49004e-05	0.0103414	6.43201e-06	0.0793325	5.97739e-06	0.0182464	5.80906e-06	0.000196302	0.000390727	0.000371185	3.66191e-07	0.0094613	1.49379e-06	6.17133e-07	0.000608753	0.000594361
C7	0.000396169	0.000173134	0.000691079	9.07526e-06	0.0185561	5.97739e-06	0.0815684	5.15878e-06	0.000218233	0.000179287	7.42651e-07	2.6333e-06	0.00060368	5.00111e-07	0.00944467	0.00968424	1.97431e-07	4.22975e-07
C8	0.000180935	0.000445846	8.01519e-05	0.000723662	8.52451e-06	0.0182464	5.15878e-06	0.0816346	3.83079e-06	0.000161772	0.000182358	0.000125214	1.91622e-07	0.000584333	1.68226e-06	7.78701e-07	0.0096848	0.00960012
H9	0.000536085	0.000176731	0.00925887	4.96194e-06	0.000404879	5.80906e-06	0.000218233	3.83079e-06	0.00795456	0.000296264	2.49108e-06	4.01307e-07	2.08353e-05	5.96809e-07	9.33634e-06	1.44054e-05	2.41915e-07	2.6077e-07
H10	0.000562915	0.000126649	0.00912057	1.34084e-05	0.000382595	0.000196302	0.000179287	0.000161772	0.000296264	0.0075602	2.34211e-06	1.94382e-06	3.13314e-05	2.32716e-05	9.59228e-06	1.34449e-05	8.45876e-06	4.19854e-06
H11	0.00017003	0.000534019	9.2168e-06	0.00928794	1.88735e-06	0.000390727	7.42651e-07	0.000182358	2.49108e-06	2.34211e-06	0.00797417	0.00029192	3.67288e-07	3.08142e-05	6.99588e-07	2.3891e-08	1.62571e-05	9.88416e-06
H12	0.000144579	0.000579126	6.07175e-06	0.00926806	3.36063e-06	0.000371185	2.6333e-06	0.000125214	4.01307e-07	1.94382e-06	0.00029192	0.00787609	4.45947e-07	0.000102866	1.27163e-06	1.02487e-07	8.98752e-06	8.23606e-05
H13	0.000167654	1.41519e-05	0.000410833	1.77995e-06	0.00948575	3.66191e-07	0.00060368	1.91622e-07	2.08353e-05	3.13314e-05	3.67288e-07	4.45947e-07	0.00840555	9.19961e-08	0.000133549	7.99932e-05	1.27079e-08	1.01767e-07
H14	1.14886e-05	0.000122571	8.94555e-06	0.000396875	7.62297e-07	0.0094613	5.00111e-07	0.000584333	5.96809e-07	2.32716e-05	3.08142e-05	0.000102866	9.19961e-08	0.00826211	1.02397e-07	2.99717e-08	7.32743e-05	0.00013559
H15	0.000420181	8.49825e-05	8.84294e-05	8.16499e-06	0.000586061	1.49379e-06	0.00944467	1.68226e-06	9.33634e-06	9.59228e-06	6.99588e-07	1.27163e-06	0.000133549	1.02397e-07	0.00781097	0.000318403	7.5583e-08	2.90095e-07
H16	3.22444e-05	5.32005e-06	0.00012972	3.02272e-07	0.000628984	6.17133e-07	0.00968424	7.78701e-07	1.44054e-05	1.34449e-05	2.3891e-08	1.02487e-07	7.99932e-05	2.99717e-08	0.000318403	0.00828783	2.30587e-08	3.8548e-08
H17	6.2678e-06	3.05242e-05	2.51057e-06	0.000125942	3.67029e-07	0.000608753	1.97431e-07	0.0096848	2.41915e-07	8.45876e-06	1.62571e-05	8.98752e-06	1.27079e-08	7.32743e-05	7.5583e-08	2.30587e-08	0.00825725	0.000335893
H18	6.23846e-05	2.69537e-05	3.4444e-06	0.000125535	9.67896e-07	0.000594361	4.22975e-07	0.00960012	2.6077e-07	4.19854e-06	9.88416e-06	8.23606e-05	1.01767e-07	0.00013559	2.90095e-07	3.8548e-08	0.000335893	0.0081685
Weighted LDM — diallyl_disufide_9_LIDI_matrix (× 0.02)
	S1	S2	C3	C4	C5	C6	C7	C8	H9	H10	H11	H12	H13	H14	H15	H16	H17	H18	Total
S1	0.292237	0.0132288	0.0105094	0.000791281	0.000849672	0.000294971	0.000417664	0.00027151	0.000588185	0.00056562	7.73907e-05	0.000175471	0.000121135	1.01732e-05	2.1751e-05	2.52148e-05	7.48135e-06	4.74321e-05	1.56003
S2	0.0132288	0.2929	0.000806909	0.0105203	0.000182037	0.000815996	0.000102587	0.000466441	5.0381e-05	0.000233945	0.000583916	0.000534483	6.77655e-06	0.000130751	1.00211e-05	4.79211e-06	3.10759e-05	2.67831e-05
C3	0.0105094	0.000806909	0.0801835	4.38787e-05	0.0103159	1.26269e-05	0.000748277	6.8342e-06	0.00932202	0.00925281	4.02137e-05	5.19785e-06	0.000391467	2.4611e-06	0.000127075	0.000126999	2.36012e-07	3.87541e-06
C4	0.000791281	0.0105203	4.38787e-05	0.0801694	1.05074e-05	0.0103501	4.76806e-06	0.000736165	3.47829e-05	6.56935e-06	0.00928939	0.00929159	2.80742e-06	0.000396915	3.45128e-07	4.23108e-07	0.00012559	0.000127367
C5	0.000849672	0.000182037	0.0103159	1.05074e-05	0.0795319	1.82314e-06	0.01842	1.30921e-06	0.000375869	0.000375732	5.68652e-06	3.01813e-06	0.00946136	4.15854e-07	0.000603645	0.000606924	6.1926e-08	6.21915e-07
C6	0.000294971	0.000815996	1.26269e-05	0.0103501	1.82314e-06	0.0792917	1.14047e-06	0.0183371	4.10117e-06	4.32708e-06	0.0003742	0.000385288	2.73792e-07	0.00946256	8.50975e-08	1.64453e-07	0.000604417	0.000605249
C7	0.000417664	0.000102587	0.000748277	4.76806e-06	0.01842	1.14047e-06	0.081634	7.22693e-07	0.000131377	0.000183147	1.49612e-06	2.40294e-06	0.000586225	2.22558e-07	0.00967218	0.00962334	2.44078e-08	5.16346e-07
C8	0.00027151	0.000466441	6.8342e-06	0.000736165	1.30921e-06	0.0183371	7.22693e-07	0.0815295	4.61512e-06	3.16652e-06	0.000127298	0.000179704	2.83911e-07	0.000580215	6.00029e-08	3.60717e-07	0.009677	0.0096198
H9	0.000588185	5.0381e-05	0.00932202	3.47829e-05	0.000375869	4.10117e-06	0.000131377	4.61512e-06	0.00816211	0.000303073	4.73984e-05	3.26854e-06	0.000101992	1.83953e-06	9.6627e-06	8.41395e-05	4.30243e-07	5.13088e-06
H10	0.00056562	0.000233945	0.00925281	6.56935e-06	0.000375732	4.32708e-06	0.000183147	3.16652e-06	0.000303073	0.00779096	1.85166e-06	4.38327e-07	3.26662e-05	3.17318e-07	1.60152e-05	1.07331e-05	1.44e-07	3.54834e-07
H11	7.73907e-05	0.000583916	4.02137e-05	0.00928939	5.68652e-06	0.0003742	1.49612e-06	0.000127298	4.73984e-05	1.85166e-06	0.00805089	0.000299414	1.67679e-06	0.000103166	1.82613e-07	2.9034e-07	9.26539e-06	8.50359e-05
H12	0.000175471	0.000534483	5.19785e-06	0.00929159	3.01813e-06	0.000385288	2.40294e-06	0.000179704	3.26854e-06	4.38327e-07	0.000299414	0.00798077	5.94038e-07	3.07211e-05	1.31113e-07	1.18058e-07	1.59368e-05	1.00955e-05
H13	0.000121135	6.77655e-06	0.000391467	2.80742e-06	0.00946136	2.73792e-07	0.000586225	2.83911e-07	0.000101992	3.26662e-05	1.67679e-06	5.94038e-07	0.00816636	3.33389e-08	7.26119e-05	0.00013567	1.03909e-08	3.48326e-07
H14	1.01732e-05	0.000130751	2.4611e-06	0.000396915	4.15854e-07	0.00946256	2.22558e-07	0.000580215	1.83953e-06	3.17318e-07	0.000103166	3.07211e-05	3.33389e-08	0.00823204	3.01489e-08	4.60829e-08	7.277e-05	0.000135886
H15	2.1751e-05	1.00211e-05	0.000127075	3.45128e-07	0.000603645	8.50975e-08	0.00967218	6.00029e-08	9.6627e-06	1.60152e-05	1.82613e-07	1.31113e-07	7.26119e-05	3.01489e-08	0.00818824	0.000337077	2.4106e-09	7.39447e-08
H16	2.52148e-05	4.79211e-06	0.000126999	4.23108e-07	0.000606924	1.64453e-07	0.00962334	3.60717e-07	8.41395e-05	1.07331e-05	2.9034e-07	1.18058e-07	0.00013567	4.60829e-08	0.000337077	0.00827077	3.35058e-08	6.14967e-07
H17	7.48135e-06	3.10759e-05	2.36012e-07	0.00012559	6.1926e-08	0.000604417	2.44078e-08	0.009677	4.30243e-07	1.44e-07	9.26539e-06	1.59368e-05	1.03909e-08	7.277e-05	2.4106e-09	3.35058e-08	0.00822286	0.000338324
H18	4.74321e-05	2.67831e-05	3.87541e-06	0.000127367	6.21915e-07	0.000605249	5.16346e-07	0.0096198	5.13088e-06	3.54834e-07	8.50359e-05	1.00955e-05	3.48326e-07	0.000135886	7.39447e-08	6.14967e-07	0.000338324	0.00831738
Weighted LDM — diallyl_disufide_10_LIDI_matrix (× 0.01)
	S1	S2	C3	C4	C5	C6	C7	C8	H9	H10	H11	H12	H13	H14	H15	H16	H17	H18	Total
S1	0.146459	0.0066009	0.00526056	0.000403641	0.000409002	9.48282e-05	0.000233299	5.25584e-05	0.000266185	0.000290142	4.76885e-05	7.61266e-05	6.48733e-05	5.15915e-06	1.5561e-05	1.36184e-05	4.94953e-06	2.54081e-06	0.779984
S2	0.0066009	0.146124	0.000397488	0.00525221	0.000144685	0.000423226	0.000136255	0.000207274	8.8391e-05	4.33526e-05	0.000293262	0.000283291	5.02615e-06	5.95716e-05	3.81456e-06	2.74053e-05	1.09105e-05	1.26099e-05
C3	0.00526056	0.000397488	0.0400755	2.28131e-05	0.00517368	4.27558e-06	0.00036767	2.30712e-06	0.00464442	0.00463918	3.75243e-06	2.41572e-05	0.000198523	7.2665e-07	6.2788e-05	6.37928e-05	1.9414e-07	1.93071e-07
C4	0.000403641	0.00525221	2.28131e-05	0.0400621	6.75973e-06	0.0051559	3.53814e-06	0.000372722	2.70416e-06	2.24073e-05	0.00465411	0.00463592	1.25467e-06	0.000196839	1.18058e-07	1.19875e-06	6.33903e-05	6.32157e-05
C5	0.000409002	0.000144685	0.00517368	6.75973e-06	0.0396464	7.01008e-07	0.00916787	2.68252e-07	0.000192592	0.000186482	2.2092e-06	2.13278e-06	0.00473141	3.2267e-07	0.000302259	0.000301888	3.22822e-08	3.56225e-08
C6	9.48282e-05	0.000423226	4.27558e-06	0.0051559	7.01008e-07	0.0397775	7.01196e-07	0.00921093	1.21566e-06	2.33604e-06	0.000183201	0.000193623	2.06414e-07	0.00473636	3.19402e-08	7.27326e-07	0.000302458	0.000301988
C7	0.000233299	0.000136255	0.00036767	3.53814e-06	0.00916787	7.01196e-07	0.0407685	1.56372e-07	8.95983e-05	6.37538e-05	1.68289e-06	1.09865e-06	0.000290127	9.50321e-07	0.00483876	0.00480959	2.32887e-08	4.67851e-08
C8	5.25584e-05	0.000207274	2.30712e-06	0.000372722	2.68252e-07	0.00921093	1.56372e-07	0.0408079	9.80575e-07	1.7318e-06	6.3905e-05	9.18385e-05	1.30444e-07	0.000295054	1.04237e-08	1.21672e-07	0.00483621	0.00480776
H9	0.000266185	8.8391e-05	0.00464442	2.70416e-06	0.000192592	1.21566e-06	8.95983e-05	9.80575e-07	0.00398843	0.000149662	2.70338e-07	2.49765e-06	1.52996e-05	5.48336e-08	7.9603e-06	5.02403e-06	5.59232e-08	3.9381e-08
H10	0.000290142	4.33526e-05	0.00463918	2.24073e-05	0.000186482	2.33604e-06	6.37538e-05	1.7318e-06	0.000149662	0.00403076	1.38341e-06	3.30042e-05	5.14679e-05	1.65333e-07	4.65206e-06	4.28337e-05	2.22032e-07	9.35244e-08
H11	4.76885e-05	0.000293262	3.75243e-06	0.00465411	2.2092e-06	0.000183201	1.68289e-06	6.3905e-05	2.70338e-07	1.38341e-06	0.00398686	0.000151213	9.89629e-08	5.09535e-05	5.09731e-08	2.35625e-07	4.64346e-06	4.03141e-05
H12	7.61266e-05	0.000283291	2.41572e-05	0.00463592	2.13278e-06	0.000193623	1.09865e-06	9.18385e-05	2.49765e-06	3.30042e-05	0.000151213	0.00399922	1.10428e-06	1.67746e-05	7.68966e-08	9.61584e-07	8.14969e-06	5.37161e-06
H13	6.48733e-05	5.02615e-06	0.000198523	1.25467e-06	0.00473141	2.06414e-07	0.000290127	1.30444e-07	1.52996e-05	5.14679e-05	9.89629e-08	1.10428e-06	0.00411559	8.32585e-08	3.63838e-05	6.79432e-05	1.66107e-08	7.40947e-09
H14	5.15915e-06	5.95716e-05	7.2665e-07	0.000196839	3.2267e-07	0.00473636	9.50321e-07	0.000295054	5.48336e-08	1.65333e-07	5.09535e-05	1.67746e-05	8.32585e-08	0.00411419	6.60529e-08	1.10629e-06	3.66021e-05	6.78274e-05
H15	1.5561e-05	3.81456e-06	6.2788e-05	1.18058e-07	0.000302259	3.19402e-08	0.00483876	1.04237e-08	7.9603e-06	4.65206e-06	5.09731e-08	7.68966e-08	3.63838e-05	6.60529e-08	0.00411215	0.000169174	1.17198e-09	1.61365e-09
H16	1.36184e-05	2.74053e-05	6.37928e-05	1.19875e-06	0.000301888	7.27326e-07	0.00480959	1.21672e-07	5.02403e-06	4.28337e-05	2.35625e-07	9.61584e-07	6.79432e-05	1.10629e-06	0.000169174	0.00415705	2.92919e-08	7.98943e-08
H17	4.94953e-06	1.09105e-05	1.9414e-07	6.33903e-05	3.22822e-08	0.000302458	2.32887e-08	0.00483621	5.59232e-08	2.22032e-07	4.64346e-06	8.14969e-06	1.66107e-08	3.66021e-05	1.17198e-09	2.92919e-08	0.00409783	0.000167826
H18	2.54081e-06	1.26099e-05	1.93071e-07	6.32157e-05	3.56225e-08	0.000301988	4.67851e-08	0.00480776	3.9381e-08	9.35244e-08	4.03141e-05	5.37161e-06	7.40947e-09	6.78274e-05	1.61365e-09	7.98943e-08	0.000167826	0.0041083
Weighted LDM — diallyl_disufide_11_LIDI_matrix (× 0.01)
	S1	S2	C3	C4	C5	C6	C7	C8	H9	H10	H11	H12	H13	H14	H15	H16	H17	H18	Total
S1	0.146108	0.00660302	0.00528984	0.000398515	0.000418782	0.000143208	0.000208983	0.000134809	0.000255785	0.000297435	8.91388e-05	4.27293e-05	3.90146e-05	4.98595e-06	9.68606e-06	1.51603e-05	2.72747e-05	3.80453e-06	0.780008
S2	0.00660302	0.146362	0.000396821	0.00525695	8.54323e-05	0.000408171	1.82591e-05	0.000231966	8.65787e-05	6.32169e-05	0.000266766	0.000289811	0.000116205	6.52232e-05	4.57583e-06	2.11597e-06	1.34618e-05	1.54573e-05
C3	0.00528984	0.000396821	0.0400868	2.33956e-05	0.00515445	6.04226e-06	0.000370445	3.15024e-06	0.0046426	0.00463337	2.98949e-06	2.33343e-05	0.000191987	1.25482e-06	6.3864e-05	6.33515e-05	1.35588e-06	1.06339e-07
C4	0.000398515	0.00525695	2.33956e-05	0.040083	5.19854e-06	0.00517469	1.94735e-06	0.000368044	2.67372e-06	2.51442e-05	0.00464432	0.00463888	3.20011e-06	0.000198614	2.55495e-07	2.62196e-07	6.36254e-05	6.27954e-05
C5	0.000418782	8.54323e-05	0.00515445	5.19854e-06	0.0397226	2.48715e-06	0.00924019	1.82072e-06	0.000182797	0.000195042	4.96827e-07	1.76121e-06	0.00469572	1.37039e-07	0.000307537	0.000304889	2.72179e-07	6.20044e-08
C6	0.000143208	0.000408171	6.04226e-06	0.00517469	2.48715e-06	0.0396517	1.25785e-06	0.00916956	3.34378e-07	2.17743e-06	0.000192418	0.000186566	1.67153e-06	0.00473106	1.0281e-07	1.23955e-07	0.000302032	0.000302227
C7	0.000208983	1.82591e-05	0.000370445	1.94735e-06	0.00924019	1.25785e-06	0.0408413	7.09469e-07	6.53045e-05	9.44699e-05	3.34207e-07	1.67197e-06	0.000287676	9.89276e-08	0.00482033	0.00484073	2.21245e-07	2.52633e-08
C8	0.000134809	0.000231966	3.15024e-06	0.000368044	1.82072e-06	0.00916956	7.09469e-07	0.0407697	3.42172e-07	1.34268e-06	8.95978e-05	6.36073e-05	1.35223e-06	0.000289974	7.56564e-08	8.06661e-08	0.00480878	0.00483854
H9	0.000255785	8.65787e-05	0.0046426	2.67372e-06	0.000182797	3.34378e-07	6.53045e-05	3.42172e-07	0.00400244	0.000148685	8.3946e-07	2.2589e-06	5.13092e-05	1.76369e-07	4.35956e-05	4.93469e-06	1.27005e-07	1.87702e-08
H10	0.000297435	6.32169e-05	0.00463337	2.51442e-05	0.000195042	2.17743e-06	9.44699e-05	1.34268e-06	0.000148685	0.00399214	2.66305e-06	3.46425e-05	1.0853e-05	1.13599e-06	4.55563e-06	7.72963e-06	1.35724e-06	1.06975e-07
H11	8.91388e-05	0.000266766	2.98949e-06	0.00464432	4.96827e-07	0.000192418	3.34207e-07	8.95978e-05	8.3946e-07	2.66305e-06	0.00398611	0.00014954	1.22901e-07	1.52865e-05	2.41105e-08	2.52542e-08	5.01028e-06	7.95239e-06
H12	4.27293e-05	0.000289811	2.33343e-05	0.00463888	1.76121e-06	0.000186566	1.67197e-06	6.36073e-05	2.2589e-06	3.46425e-05	0.00014954	0.00402448	3.33713e-07	5.13535e-05	9.84656e-08	1.69139e-07	4.2512e-05	4.62153e-06
H13	3.90146e-05	0.000116205	0.000191987	3.20011e-06	0.00469572	1.67153e-06	0.000287676	1.35223e-06	5.13092e-05	1.0853e-05	1.22901e-07	3.33713e-07	0.00402327	1.20142e-07	6.63786e-05	3.61268e-05	6.44953e-08	8.90875e-08
H14	4.98595e-06	6.52232e-05	1.25482e-06	0.000198614	1.37039e-07	0.00473106	9.89276e-08	0.000289974	1.76369e-07	1.13599e-06	1.52865e-05	5.13535e-05	1.20142e-07	0.0041142	1.19047e-08	1.01612e-08	6.78428e-05	3.63848e-05
H15	9.68606e-06	4.57583e-06	6.3864e-05	2.55495e-07	0.000307537	1.0281e-07	0.00482033	7.56564e-08	4.35956e-05	4.55563e-06	2.41105e-08	9.84656e-08	6.63786e-05	1.19047e-08	0.00417915	0.00017059	1.23677e-08	4.51943e-09
H16	1.51603e-05	2.11597e-06	6.33515e-05	2.62196e-07	0.000304889	1.23955e-07	0.00484073	8.06661e-08	4.93469e-06	7.72963e-06	2.52542e-08	1.69139e-07	3.61268e-05	1.01612e-08	0.00017059	0.00411966	1.73111e-08	2.97189e-09
H17	2.72747e-05	1.34618e-05	1.35588e-06	6.36254e-05	2.72179e-07	0.000302032	2.21245e-07	0.00480878	1.27005e-07	1.35724e-06	5.01028e-06	4.2512e-05	6.44953e-08	6.78428e-05	1.23677e-08	1.73111e-08	0.00414875	0.000168895
H18	3.80453e-06	1.54573e-05	1.06339e-07	6.27954e-05	6.20044e-08	0.000302227	2.52633e-08	0.00483854	1.87702e-08	1.06975e-07	7.95239e-06	4.62153e-06	8.90875e-08	3.63848e-05	4.51943e-09	2.97189e-09	0.000168895	0.0041107
Weighted LDM — diallyl_disufide_12_LIDI_matrix (× 0.01)
	S1	S2	C3	C4	C5	C6	C7	C8	H9	H10	H11	H12	H13	H14	H15	H16	H17	H18	Total
S1	0.146457	0.00661875	0.00528547	0.000381949	0.00038582	7.25663e-05	0.000220507	1.76969e-05	0.000305678	0.000267081	8.22841e-05	6.49972e-05	2.19656e-05	7.75758e-05	1.50058e-05	1.03289e-05	1.85898e-06	3.50247e-06	0.780011
S2	0.00661875	0.146456	0.000381895	0.00528663	7.26025e-05	0.000385711	1.76964e-05	0.000220512	6.49942e-05	8.2287e-05	0.00026708	0.000305643	7.76006e-05	2.19464e-05	1.85903e-06	3.50293e-06	1.50065e-05	1.03282e-05
C3	0.00528547	0.000381895	0.0400989	2.17374e-05	0.00517019	7.8389e-06	0.00037018	2.38655e-06	0.00464209	0.00463543	5.72302e-06	3.88041e-06	0.000187067	6.03644e-06	6.35076e-05	6.32407e-05	2.59953e-07	2.97068e-07
C4	0.000381949	0.00528663	2.17374e-05	0.0400978	7.93344e-06	0.00517037	2.40531e-06	0.000370613	3.88306e-06	5.72651e-06	0.00463498	0.00464181	6.14181e-06	0.000186989	2.60891e-07	3.00232e-07	6.35152e-05	6.32213e-05
C5	0.00038582	7.26025e-05	0.00517019	7.93344e-06	0.0396993	8.52621e-05	0.00918081	2.54496e-05	0.000194953	0.000183445	1.83004e-06	7.152e-07	0.0046378	9.62097e-05	0.000304365	0.000304642	1.72373e-06	1.64131e-06
C6	7.25663e-05	0.000385711	7.8389e-06	0.00517037	8.52621e-05	0.0396991	2.54572e-05	0.00918044	7.15566e-07	1.82988e-06	0.000183339	0.000194949	9.61987e-05	0.00463787	1.7245e-06	1.64108e-06	0.000304352	0.000304504
C7	0.000220507	1.76964e-05	0.00037018	2.40531e-06	0.00918081	2.54572e-05	0.0408622	8.90971e-06	8.7754e-05	6.53398e-05	8.39179e-07	3.30884e-07	0.000279619	5.36278e-05	0.0048412	0.00481794	1.77069e-06	8.58338e-07
C8	1.76969e-05	0.000220512	2.38655e-06	0.000370613	2.54496e-05	0.00918044	8.90971e-06	0.0408622	3.30888e-07	8.38905e-07	6.54148e-05	8.77585e-05	5.36196e-05	0.000279589	1.76997e-06	8.58156e-07	0.0048411	0.00481808
H9	0.000305678	6.49942e-05	0.00464209	3.88306e-06	0.000194953	7.15566e-07	8.7754e-05	3.30888e-07	0.0039291	0.000147237	2.88716e-07	1.6876e-06	1.40045e-05	1.20346e-06	8.15091e-06	4.61029e-06	3.8854e-08	4.07824e-08
H10	0.000267081	8.2287e-05	0.00463543	5.72651e-06	0.000183445	1.82988e-06	6.53398e-05	8.38905e-07	0.000147237	0.00399314	2.33059e-06	2.88736e-07	4.88619e-05	5.3686e-07	4.86142e-06	4.18914e-05	7.89575e-08	7.62602e-08
H11	8.22841e-05	0.00026708	5.72302e-06	0.00463498	1.83004e-06	0.000183339	8.39179e-07	6.54148e-05	2.88716e-07	2.33059e-06	0.00399309	0.000147235	5.36577e-07	4.88615e-05	7.89561e-08	7.62615e-08	4.8612e-06	4.18893e-05
H12	6.49972e-05	0.000305643	3.88041e-06	0.00464181	7.152e-07	0.000194949	3.30884e-07	8.77585e-05	1.6876e-06	2.88736e-07	0.000147235	0.00392908	1.20354e-06	1.40039e-05	3.88515e-08	4.07842e-08	8.15073e-06	4.61044e-06
H13	2.19656e-05	7.76006e-05	0.000187067	6.14181e-06	0.0046378	9.61987e-05	0.000279619	5.36196e-05	1.40045e-05	4.88619e-05	5.36577e-07	1.20354e-06	0.00390192	2.91842e-05	3.56768e-05	6.50916e-05	3.15706e-06	1.47692e-06
H14	7.75758e-05	2.19464e-05	6.03644e-06	0.000186989	9.62097e-05	0.00463787	5.36278e-05	0.000279589	1.20346e-06	5.3686e-07	4.88615e-05	1.40039e-05	2.91842e-05	0.00390193	3.15759e-06	1.47668e-06	3.56787e-05	6.50909e-05
H15	1.50058e-05	1.85903e-06	6.35076e-05	2.60891e-07	0.000304365	1.7245e-06	0.0048412	1.76997e-06	8.15091e-06	4.86142e-06	7.89561e-08	3.88515e-08	3.56768e-05	3.15759e-06	0.00412524	0.000170613	1.45604e-06	1.48458e-07
H16	1.03289e-05	3.50293e-06	6.32407e-05	3.00232e-07	0.000304642	1.64108e-06	0.00481794	8.58156e-07	4.61029e-06	4.18914e-05	7.62615e-08	4.07842e-08	6.50916e-05	1.47668e-06	0.000170613	0.00416323	1.48466e-07	4.57506e-08
H17	1.85898e-06	1.50065e-05	2.59953e-07	6.35152e-05	1.72373e-06	0.000304352	1.77069e-06	0.0048411	3.8854e-08	7.89575e-08	4.8612e-06	8.15073e-06	3.15706e-06	3.56787e-05	1.45604e-06	1.48466e-07	0.00412526	0.000170614
H18	3.50247e-06	1.03282e-05	2.97068e-07	6.32213e-05	1.64131e-06	0.000304504	8.58338e-07	0.00481808	4.07824e-08	7.62602e-08	4.18893e-05	4.61044e-06	1.47692e-06	6.50909e-05	1.48458e-07	4.57506e-08	0.000170614	0.00416318
Weighted LDM — diallyl_disufide_13_LIDI_matrix (× 0.01)
	S1	S2	C3	C4	C5	C6	C7	C8	H9	H10	H11	H12	H13	H14	H15	H16	H17	H18	Total
S1	0.146435	0.00660788	0.00528758	0.000393944	0.000393401	9.17275e-05	0.00022358	5.29584e-05	0.000257931	0.000305184	3.44106e-05	8.76723e-05	2.18946e-05	4.41993e-06	1.05149e-05	1.49828e-05	2.50935e-06	4.97843e-06	0.779985
S2	0.00660788	0.146396	0.000392749	0.00523003	9.21129e-05	0.00043255	1.91107e-05	0.000213967	8.54273e-05	6.10626e-05	0.000297755	0.000267648	0.000102269	6.07717e-05	4.04126e-06	1.77694e-06	1.29823e-05	1.10747e-05
C3	0.00528758	0.000392749	0.0401018	1.75974e-05	0.00515809	3.97004e-06	0.000364425	1.77437e-06	0.00464133	0.00464672	3.86509e-06	6.86e-06	0.00019188	1.1316e-06	6.20228e-05	6.32412e-05	1.70176e-07	1.52728e-07
C4	0.000393944	0.00523003	1.75974e-05	0.0401171	3.88226e-05	0.00516605	1.19554e-05	0.00037332	3.74271e-06	3.75031e-06	0.00465984	0.00458186	3.08904e-05	0.000196872	8.48837e-07	5.76785e-07	6.31988e-05	6.33986e-05
C5	0.000393401	9.21129e-05	0.00515809	3.88226e-05	0.0396917	3.26443e-06	0.00920599	2.15119e-06	0.000183276	0.000196523	2.21877e-06	7.91854e-05	0.00468299	2.87836e-06	0.000303673	0.000305027	1.75706e-07	2.556e-07
C6	9.17275e-05	0.00043255	3.97004e-06	0.00516605	3.26443e-06	0.0397694	8.60551e-07	0.0092028	1.39682e-06	4.27132e-07	0.000185633	0.000185918	5.27297e-06	0.00473506	1.1444e-07	7.31239e-08	0.000301706	0.000302058
C7	0.00022358	1.91107e-05	0.000364425	1.19554e-05	0.00920599	8.60551e-07	0.0408314	1.24363e-06	6.43167e-05	8.57797e-05	1.28152e-06	3.0797e-05	0.000292283	4.48311e-07	0.00481477	0.0048402	8.9272e-08	1.0383e-07
C8	5.29584e-05	0.000213967	1.77437e-06	0.00037332	2.15119e-06	0.0092028	1.24363e-06	0.0408167	9.92216e-07	9.52083e-08	6.41778e-05	9.01935e-05	1.07724e-06	0.000295037	8.28284e-08	6.0814e-08	0.00480793	0.00483683
H9	0.000257931	8.54273e-05	0.00464133	3.74271e-06	0.000183276	1.39682e-06	6.43167e-05	9.92216e-07	0.00400075	0.000147077	6.17087e-07	1.21934e-06	5.00131e-05	2.85452e-07	4.06558e-05	4.81588e-06	4.87929e-08	8.52419e-08
H10	0.000305184	6.10626e-05	0.00464672	3.75031e-06	0.000196523	4.27132e-07	8.57797e-05	9.52083e-08	0.000147077	0.0039394	1.30614e-06	1.15699e-06	1.49633e-05	1.04872e-07	4.57464e-06	8.11084e-06	1.71818e-08	1.7623e-08
H11	3.44106e-05	0.000297755	3.86509e-06	0.00465984	2.21877e-06	0.000185633	1.28152e-06	6.41778e-05	6.17087e-07	1.30614e-06	0.00399934	0.000145642	2.80987e-06	5.14899e-05	8.74139e-08	5.34404e-08	4.05529e-05	4.65308e-06
H12	8.76723e-05	0.000267648	6.86e-06	0.00458186	7.91854e-05	0.000185918	3.0797e-05	9.01935e-05	1.21934e-06	1.15699e-06	0.000145642	0.00382407	4.22451e-05	1.63317e-05	1.26276e-06	1.30052e-06	5.14123e-06	7.81212e-06
H13	2.18946e-05	0.000102269	0.00019188	3.08904e-05	0.00468299	5.27297e-06	0.000292283	1.07724e-06	5.00131e-05	1.49633e-05	2.80987e-06	4.22451e-05	0.00406357	6.21174e-06	6.64709e-05	3.65681e-05	3.98737e-07	1.54778e-07
H14	4.41993e-06	6.07717e-05	1.1316e-06	0.000196872	2.87836e-06	0.00473506	4.48311e-07	0.000295037	2.85452e-07	1.04872e-07	5.14899e-05	1.63317e-05	6.21174e-06	0.00412809	2.02378e-07	5.62617e-08	6.78443e-05	3.6538e-05
H15	1.05149e-05	4.04126e-06	6.20228e-05	8.48837e-07	0.000303673	1.1444e-07	0.00481477	8.28284e-08	4.06558e-05	4.57464e-06	8.74139e-08	1.26276e-06	6.64709e-05	2.02378e-07	0.00414473	0.000169512	9.98988e-09	1.06809e-08
H16	1.49828e-05	1.77694e-06	6.32412e-05	5.76785e-07	0.000305027	7.31239e-08	0.0048402	6.0814e-08	4.81588e-06	8.11084e-06	5.34404e-08	1.30052e-06	3.65681e-05	5.62617e-08	0.000169512	0.00411598	6.68066e-09	7.19635e-09
H17	2.50935e-06	1.29823e-05	1.70176e-07	6.31988e-05	1.75706e-07	0.000301706	8.9272e-08	0.00480793	4.87929e-08	1.71818e-08	4.05529e-05	5.14123e-06	3.98737e-07	6.78443e-05	9.98988e-09	6.68066e-09	0.00410728	0.000167832
H18	4.97843e-06	1.10747e-05	1.52728e-07	6.33986e-05	2.556e-07	0.000302058	1.0383e-07	0.00483683	8.52419e-08	1.7623e-08	4.65308e-06	7.81212e-06	1.54778e-07	3.6538e-05	1.06809e-08	7.19635e-09	0.000167832	0.00409836
Weighted LDM — diallyl_disufide_14_LIDI_matrix (× 0.01)
	S1	S2	C3	C4	C5	C6	C7	C8	H9	H10	H11	H12	H13	H14	H15	H16	H17	H18	Total
S1	0.146408	0.00661833	0.00528928	0.00039433	0.000401429	8.80326e-05	0.000228551	4.9626e-05	0.000304663	0.000259734	0.000114206	2.29143e-05	2.22022e-05	3.37759e-06	1.08412e-05	1.50239e-05	4.8847e-06	2.30107e-06	0.779987
S2	0.00661833	0.146395	0.00039153	0.00524081	8.17017e-05	0.000428331	1.86065e-05	0.000209086	6.3714e-05	8.49142e-05	0.000283154	0.000285991	8.35472e-05	6.32402e-05	3.67189e-06	1.68773e-06	1.09961e-05	1.23952e-05
C3	0.00528928	0.00039153	0.040106	1.7148e-05	0.00515887	5.40565e-06	0.0003655	2.94726e-06	0.00464635	0.00463976	3.73178e-06	5.83726e-06	0.000192359	1.09531e-06	6.22928e-05	6.32252e-05	2.19233e-07	2.33188e-07
C4	0.00039433	0.00524081	1.7148e-05	0.0400929	3.33267e-05	0.0051623	9.15994e-06	0.000375175	3.54251e-06	3.62603e-06	0.00462043	0.00462301	3.79507e-05	0.00019548	7.90527e-07	5.39169e-07	6.35013e-05	6.37412e-05
C5	0.000401429	8.17017e-05	0.00515887	3.33267e-05	0.0396793	3.70431e-06	0.00921413	8.23326e-07	0.000195728	0.000183285	2.54818e-06	5.95272e-05	0.00468593	1.18888e-06	0.000304295	0.000305108	1.01454e-07	3.50421e-07
C6	8.80326e-05	0.000428331	5.40565e-06	0.0051623	3.70431e-06	0.0397719	1.08967e-06	0.00920861	4.74959e-07	2.23558e-06	0.000187353	0.000182773	3.13262e-06	0.00472966	1.30125e-07	6.96686e-08	0.000301657	0.000303701
C7	0.000228551	1.86065e-05	0.0003655	9.15994e-06	0.00921413	1.08967e-06	0.0408281	1.66747e-07	8.48514e-05	6.49264e-05	8.94333e-07	1.71945e-05	0.000293721	4.0908e-07	0.00481561	0.00484116	2.55105e-08	9.3107e-08
C8	4.9626e-05	0.000209086	2.94726e-06	0.000375175	8.23326e-07	0.00920861	1.66747e-07	0.0408208	2.67218e-07	1.68384e-06	9.27791e-05	6.48037e-05	7.69092e-07	0.000292841	4.59661e-08	1.34453e-08	0.00483596	0.00481198
H9	0.000304663	6.3714e-05	0.00464635	3.54251e-06	0.000195728	4.74959e-07	8.48514e-05	2.67218e-07	0.00393533	0.000146897	1.99818e-06	6.30775e-07	1.51849e-05	5.95995e-08	4.58568e-06	8.10181e-06	2.58398e-08	2.28761e-08
H10	0.000259734	8.49142e-05	0.00463976	3.62603e-06	0.000183285	2.23558e-06	6.49264e-05	1.68384e-06	0.000146897	0.00399967	1.88202e-07	1.2083e-06	4.95256e-05	2.34071e-07	4.08998e-05	4.83143e-06	1.13296e-07	9.49443e-08
H11	0.000114206	0.000283154	3.73178e-06	0.00462043	2.54818e-06	0.000187353	8.94333e-07	9.27791e-05	1.99818e-06	1.88202e-07	0.00387436	0.00014849	1.84242e-06	1.5991e-05	5.10284e-08	4.54242e-08	8.02259e-06	5.37486e-06
H12	2.29143e-05	0.000285991	5.83726e-06	0.00462301	5.95272e-05	0.000182773	1.71945e-05	6.48037e-05	6.30775e-07	1.2083e-06	0.00014849	0.00399986	6.15191e-05	4.93471e-05	1.36735e-06	9.84111e-07	4.72169e-06	4.15397e-05
H13	2.22022e-05	8.35472e-05	0.000192359	3.79507e-05	0.00468593	3.13262e-06	0.000293721	7.69092e-07	1.51849e-05	4.95256e-05	1.84242e-06	6.15191e-05	0.00407545	1.48569e-06	6.65995e-05	3.66516e-05	6.05712e-08	6.7686e-07
H14	3.37759e-06	6.32402e-05	1.09531e-06	0.00019548	1.18888e-06	0.00472966	4.0908e-07	0.000292841	5.95995e-08	2.34071e-07	1.5991e-05	4.93471e-05	1.48569e-06	0.00408138	3.98115e-08	3.33579e-08	3.63118e-05	6.78148e-05
H15	1.08412e-05	3.67189e-06	6.22928e-05	7.90527e-07	0.000304295	1.30125e-07	0.00481561	4.59661e-08	4.58568e-06	4.08998e-05	5.10284e-08	1.36735e-06	6.65995e-05	3.98115e-08	0.00414851	0.000169695	5.35714e-09	2.3337e-08
H16	1.50239e-05	1.68773e-06	6.32252e-05	5.39169e-07	0.000305108	6.96686e-08	0.00484116	1.34453e-08	8.10181e-06	4.83143e-06	4.54242e-08	9.84111e-07	3.66516e-05	3.33579e-08	0.000169695	0.00412059	2.56293e-09	1.0578e-08
H17	4.8847e-06	1.09961e-05	2.19233e-07	6.35013e-05	1.01454e-07	0.000301657	2.55105e-08	0.00483596	2.58398e-08	1.13296e-07	8.02259e-06	4.72169e-06	6.05712e-08	3.63118e-05	5.35714e-09	2.56293e-09	0.00409408	0.000168554
H18	2.30107e-06	1.23952e-05	2.33188e-07	6.37412e-05	3.50421e-07	0.000303701	9.3107e-08	0.00481198	2.28761e-08	9.49443e-08	5.37486e-06	4.15397e-05	6.7686e-07	6.78148e-05	2.3337e-08	1.0578e-08	0.000168554	0.00413539
Weighted LDM — diallyl_disufide_15_LIDI_matrix (× 0.01)
	S1	S2	C3	C4	C5	C6	C7	C8	H9	H10	H11	H12	H13	H14	H15	H16	H17	H18	Total
S1	0.146411	0.00661081	0.00526558	0.000395062	0.000401888	7.77783e-05	0.00023059	2.40993e-05	0.000263585	0.000292685	0.000123454	2.54684e-05	5.52879e-05	1.66796e-05	1.31712e-05	1.49486e-05	1.5867e-05	2.311e-06	0.78001
S2	0.00661081	0.146099	0.000406629	0.00528734	0.000107345	0.000312552	9.75315e-05	0.000220825	8.63075e-05	7.23395e-05	0.000254464	0.000303495	6.08449e-06	6.88642e-05	3.3735e-05	3.47238e-06	0.000214741	1.63604e-05
C3	0.00526558	0.000406629	0.0401005	1.77743e-05	0.00517274	3.42442e-06	0.00036018	2.0656e-06	0.00465283	0.00463489	7.5823e-06	4.17299e-06	0.000199686	5.52829e-07	6.2029e-05	6.2648e-05	1.92156e-06	2.21912e-07
C4	0.000395062	0.00528734	1.77743e-05	0.0402268	5.58101e-05	0.00514486	4.49412e-05	0.000347342	4.0748e-06	3.3836e-06	0.00452598	0.00467409	6.0015e-06	0.000203419	2.44335e-06	1.52685e-06	4.35142e-05	6.48974e-05
C5	0.000401888	0.000107345	0.00517274	5.58101e-05	0.0396828	1.59337e-05	0.00909381	1.45743e-05	0.000193593	0.000185396	9.60309e-05	3.43711e-06	0.00473556	5.13996e-07	0.000293731	0.000300976	3.17387e-06	2.68759e-07
C6	7.77783e-05	0.000312552	3.42442e-06	0.00514486	1.59337e-05	0.0398512	4.05947e-05	0.00923777	1.48895e-06	3.19214e-07	0.000192298	0.000203829	9.75196e-07	0.0047385	5.76061e-06	6.13715e-06	0.000292499	0.000311995
C7	0.00023059	9.75315e-05	0.00036018	4.49412e-05	0.00909381	4.05947e-05	0.0407047	5.35929e-05	8.53678e-05	6.22421e-05	5.97746e-05	5.16247e-06	0.000293229	8.79293e-07	0.00478291	0.00483112	1.58095e-05	1.17305e-06
C8	2.40993e-05	0.000220825	2.0656e-06	0.000347342	1.45743e-05	0.00923777	5.35929e-05	0.0408227	6.15243e-07	3.93826e-07	0.000122432	8.19127e-05	1.37463e-06	0.000299573	1.83538e-05	6.83978e-06	0.00472794	0.0048415
H9	0.000263585	8.63075e-05	0.00465283	4.0748e-06	0.000193593	1.48895e-06	8.53678e-05	6.15243e-07	0.00400149	0.000146265	9.03815e-07	9.03626e-07	1.68467e-05	2.34495e-07	4.8021e-06	8.12437e-06	2.31248e-07	2.64059e-08
H10	0.000292685	7.23395e-05	0.00463489	3.3836e-06	0.000185396	3.19214e-07	6.22421e-05	3.93826e-07	0.000146265	0.0039384	1.56285e-06	1.15896e-06	5.07998e-05	5.80267e-08	3.98741e-05	4.41223e-06	5.66593e-07	4.92742e-08
H11	0.000123454	0.000254464	7.5823e-06	0.00452598	9.60309e-05	0.000192298	5.97746e-05	0.000122432	9.03815e-07	1.56285e-06	0.00370645	0.000147101	1.59643e-05	6.65357e-06	1.77431e-06	2.72768e-06	5.27121e-06	6.83716e-06
H12	2.54684e-05	0.000303495	4.17299e-06	0.00467409	3.43711e-06	0.000203829	5.16247e-06	8.19127e-05	9.03626e-07	1.15896e-06	0.000147101	0.00402846	3.08837e-07	2.21512e-05	9.52159e-07	1.96859e-07	4.66474e-06	7.25357e-06
H13	5.52879e-05	6.08449e-06	0.000199686	6.0015e-06	0.00473556	9.75196e-07	0.000293229	1.37463e-06	1.68467e-05	5.07998e-05	1.59643e-05	3.08837e-07	0.00415467	4.83101e-08	6.76254e-05	3.65608e-05	5.18947e-07	4.78618e-08
H14	1.66796e-05	6.88642e-05	5.52829e-07	0.000203419	5.13996e-07	0.0047385	8.79293e-07	0.000299573	2.34495e-07	5.80267e-08	6.65357e-06	2.21512e-05	4.83101e-08	0.00416685	4.76813e-07	1.73351e-07	6.62038e-05	4.04398e-05
H15	1.31712e-05	3.3735e-05	6.2029e-05	2.44335e-06	0.000293731	5.76061e-06	0.00478291	1.83538e-05	4.8021e-06	3.98741e-05	1.77431e-06	9.52159e-07	6.76254e-05	4.76813e-07	0.00407175	0.000166323	1.48796e-05	6.44707e-07
H16	1.49486e-05	3.47238e-06	6.2648e-05	1.52685e-06	0.000300976	6.13715e-06	0.00483112	6.83978e-06	8.12437e-06	4.41223e-06	2.72768e-06	1.96859e-07	3.65608e-05	1.73351e-07	0.000166323	0.00410352	6.48978e-07	1.45571e-07
H17	1.5867e-05	0.000214741	1.92156e-06	4.35142e-05	3.17387e-06	0.000292499	1.58095e-05	0.00472794	2.31248e-07	5.66593e-07	5.27121e-06	4.66474e-06	5.18947e-07	6.62038e-05	1.48796e-05	6.48978e-07	0.00392277	0.00015947
H18	2.311e-06	1.63604e-05	2.21912e-07	6.48974e-05	2.68759e-07	0.000311995	1.17305e-06	0.0048415	2.64059e-08	4.92742e-08	6.83716e-06	7.25357e-06	4.78618e-08	4.04398e-05	6.44707e-07	1.45571e-07	0.00015947	0.00413591
Weighted LDM — diallyl_disufide_16_LIDI_matrix (× 0.01)
	S1	S2	C3	C4	C5	C6	C7	C8	H9	H10	H11	H12	H13	H14	H15	H16	H17	H18	Total
S1	0.146349	0.0066146	0.00528328	0.000390863	0.000393721	7.79435e-05	0.000225577	1.7598e-05	0.000259421	0.000304429	6.33764e-05	8.50238e-05	2.10983e-05	0.000103388	1.07176e-05	1.49508e-05	4.3561e-06	2.02744e-06	0.779994
S2	0.0066146	0.14639	0.00039344	0.0052679	8.72397e-05	0.000425738	1.90639e-05	0.000213746	8.60007e-05	6.08116e-05	0.000285613	0.000257523	9.45231e-05	3.92035e-05	3.87316e-06	1.73624e-06	9.93189e-06	1.51267e-05
C3	0.00528328	0.00039344	0.0401067	1.73873e-05	0.00515901	5.39089e-06	0.000365025	1.98913e-06	0.00463977	0.00464795	7.19273e-06	2.46044e-06	0.000192186	3.95119e-06	6.22077e-05	6.32429e-05	2.83124e-07	2.60996e-07
C4	0.000390863	0.0052679	1.73873e-05	0.0401191	3.76443e-05	0.00515707	1.16057e-05	0.000370746	4.03921e-06	3.23782e-06	0.00458565	0.00464714	3.23083e-05	0.000192374	8.41306e-07	5.78361e-07	6.38619e-05	6.34492e-05
C5	0.000393721	8.72397e-05	0.00515901	3.76443e-05	0.0396947	2.70038e-06	0.00920729	2.45192e-06	0.000183308	0.000195998	8.02931e-05	2.38928e-06	0.0046847	7.37743e-07	0.000303936	0.000304685	1.36517e-07	2.21391e-07
C6	7.79435e-05	0.000425738	5.39089e-06	0.00515707	2.70038e-06	0.0397141	1.27209e-06	0.0092366	6.99105e-07	1.61153e-06	0.000189765	0.000183871	3.34128e-06	0.00469883	9.6609e-08	6.99072e-08	0.000307434	0.000304701
C7	0.000225577	1.90639e-05	0.000365025	1.16057e-05	0.00920729	1.27209e-06	0.0408301	9.51703e-07	6.46463e-05	8.46246e-05	2.91161e-05	5.56132e-07	0.000292579	3.4314e-07	0.00481449	0.00484	6.8371e-08	1.29013e-07
C8	1.7598e-05	0.000213746	1.98913e-06	0.000370746	2.45192e-06	0.0092366	9.51703e-07	0.0408423	3.8352e-07	6.185e-07	9.0544e-05	6.54183e-05	2.22639e-06	0.000287983	8.46549e-08	6.15587e-08	0.00482053	0.00484092
H9	0.000259421	8.60007e-05	0.00463977	4.03921e-06	0.000183308	6.99105e-07	6.46463e-05	3.8352e-07	0.00399755	0.000147067	1.37962e-06	1.20308e-06	4.97717e-05	1.31064e-07	4.06667e-05	4.8207e-06	3.56779e-08	5.83419e-08
H10	0.000304429	6.08116e-05	0.00464795	3.23782e-06	0.000195998	1.61153e-06	8.46246e-05	6.185e-07	0.000147067	0.00393835	8.96376e-07	1.93375e-07	1.53413e-05	1.71731e-06	4.5739e-06	8.11187e-06	7.49713e-08	7.23358e-08
H11	6.33764e-05	0.000285613	7.19273e-06	0.00458565	8.02931e-05	0.000189765	2.91161e-05	9.0544e-05	1.37962e-06	8.96376e-07	0.00384576	0.000144031	5.09996e-05	1.12892e-05	1.38616e-06	1.30901e-06	4.3985e-06	7.3766e-06
H12	8.50238e-05	0.000257523	2.46044e-06	0.00464714	2.38928e-06	0.000183871	5.56132e-07	6.54183e-05	1.20308e-06	1.93375e-07	0.000144031	0.00401807	1.25229e-06	5.15302e-05	6.64087e-08	4.57681e-08	4.36447e-05	4.93836e-06
H13	2.10983e-05	9.45231e-05	0.000192186	3.23083e-05	0.0046847	3.34128e-06	0.000292579	2.22639e-06	4.97717e-05	1.53413e-05	5.09996e-05	1.25229e-06	0.00405856	1.31738e-07	6.65345e-05	3.65371e-05	9.36229e-08	2.2585e-07
H14	0.000103388	3.92035e-05	3.95119e-06	0.000192374	7.37743e-07	0.00469883	3.4314e-07	0.000287983	1.31064e-07	1.71731e-06	1.12892e-05	5.15302e-05	1.31738e-07	0.00402961	2.0513e-08	1.83216e-08	6.65837e-05	3.61195e-05
H15	1.07176e-05	3.87316e-06	6.22077e-05	8.41306e-07	0.000303936	9.6609e-08	0.00481449	8.46549e-08	4.06667e-05	4.5739e-06	1.38616e-06	6.64087e-08	6.65345e-05	2.0513e-08	0.00414544	0.000169432	6.40096e-09	1.12555e-08
H16	1.49508e-05	1.73624e-06	6.32429e-05	5.78361e-07	0.000304685	6.99072e-08	0.00484	6.15587e-08	4.8207e-06	8.11187e-06	1.30901e-06	4.57681e-08	3.65371e-05	1.83216e-08	0.000169432	0.00411273	4.6538e-09	6.17e-09
H17	4.3561e-06	9.93189e-06	2.83124e-07	6.38619e-05	1.36517e-07	0.000307434	6.8371e-08	0.00482053	3.56779e-08	7.49713e-08	4.3985e-06	4.36447e-05	9.36229e-08	6.65837e-05	6.40096e-09	4.6538e-09	0.00418017	0.000170623
H18	2.02744e-06	1.51267e-05	2.60996e-07	6.34492e-05	2.21391e-07	0.000304701	1.29013e-07	0.00484092	5.83419e-08	7.23358e-08	7.3766e-06	4.93836e-06	2.2585e-07	3.61195e-05	1.12555e-08	6.17e-09	0.000170623	0.00411974
Weighted LDM — diallyl_disufide_17_LIDI_matrix (× 0.01)
	S1	S2	C3	C4	C5	C6	C7	C8	H9	H10	H11	H12	H13	H14	H15	H16	H17	H18	Total
S1	0.146404	0.00660668	0.0052533	0.000399967	0.000425757	8.95319e-05	0.000209091	5.03925e-05	0.000296094	0.000284439	0.000116892	2.38447e-05	6.15544e-05	3.33933e-06	1.26363e-05	1.09135e-05	4.96826e-06	2.36323e-06	0.779981
S2	0.00660668	0.146403	0.000399986	0.0052533	8.95205e-05	0.000425908	5.03921e-05	0.000209078	2.38259e-05	0.000116886	0.000284281	0.000296096	3.33837e-06	6.15549e-05	2.3631e-06	4.96826e-06	1.09129e-05	1.2636e-05
C3	0.0052533	0.000399986	0.0401014	2.05694e-05	0.00515837	4.76554e-06	0.00037386	2.00903e-06	0.00466513	0.00462469	3.35688e-06	1.46152e-05	0.000195451	1.29842e-06	6.34641e-05	6.35278e-05	1.4846e-07	1.91579e-07
C4	0.000399967	0.0052533	2.05694e-05	0.040099	4.76171e-06	0.00515809	2.0082e-06	0.000374012	1.46088e-05	3.35745e-06	0.00462399	0.00466499	1.29794e-06	0.000195277	1.91539e-07	1.48361e-07	6.35397e-05	6.35202e-05
C5	0.000425757	8.95205e-05	0.00515837	4.76171e-06	0.0397696	2.0245e-06	0.00920977	1.60015e-06	0.00018788	0.000187521	4.98344e-07	1.97861e-06	0.00473047	2.78004e-07	0.000303384	0.000301856	1.14208e-07	7.78796e-08
C6	8.95319e-05	0.000425908	4.76554e-06	0.00515809	2.0245e-06	0.03977	1.59989e-06	0.00921011	1.97884e-06	4.98886e-07	0.00018757	0.0001879	2.78006e-07	0.0047303	7.7879e-08	1.14195e-07	0.000301814	0.000303446
C7	0.000209091	5.03921e-05	0.00037386	2.0082e-06	0.00920977	1.59989e-06	0.040819	1.24087e-06	6.54306e-05	9.20847e-05	2.37506e-07	3.72097e-07	0.000292835	1.69503e-07	0.00481123	0.00483585	9.61552e-08	5.45531e-08
C8	5.03925e-05	0.000209078	2.00903e-06	0.000374012	1.60015e-06	0.00921011	1.24087e-06	0.0408191	3.72087e-07	2.37472e-07	9.20877e-05	6.54163e-05	1.69501e-07	0.000292845	5.45563e-08	9.61528e-08	0.00483595	0.00481119
H9	0.000296094	2.38259e-05	0.00466513	1.46088e-05	0.00018788	1.97884e-06	6.54306e-05	3.72087e-07	0.0040697	0.0001509	9.48838e-07	1.59906e-05	5.11215e-05	6.39599e-07	4.18542e-05	4.7983e-06	6.3079e-08	9.67818e-08
H10	0.000284439	0.000116886	0.00462469	3.35745e-06	0.000187521	4.98886e-07	9.20847e-05	2.37472e-07	0.0001509	0.00388974	1.68431e-06	9.48721e-07	1.62875e-05	1.11138e-07	5.35555e-06	8.00039e-06	1.0707e-08	3.04661e-08
H11	0.000116892	0.000284281	3.35688e-06	0.00462399	4.98344e-07	0.00018757	2.37506e-07	9.20877e-05	9.48838e-07	1.68431e-06	0.00388976	0.000150899	1.11143e-07	1.62877e-05	3.04593e-08	1.07052e-08	8.00016e-06	5.35556e-06
H12	2.38447e-05	0.000296096	1.46152e-05	0.00466499	1.97861e-06	0.0001879	3.72097e-07	6.54163e-05	1.59906e-05	9.48721e-07	0.000150899	0.00406966	6.39558e-07	5.11212e-05	9.67572e-08	6.30758e-08	4.79776e-06	4.18519e-05
H13	6.15544e-05	3.33837e-06	0.000195451	1.29794e-06	0.00473047	2.78006e-07	0.000292835	1.69501e-07	5.11215e-05	1.62875e-05	1.11143e-07	6.39558e-07	0.00408256	2.01903e-08	6.77826e-05	3.63053e-05	2.10786e-08	8.72101e-09
H14	3.33933e-06	6.15549e-05	1.29842e-06	0.000195277	2.78004e-07	0.0047303	1.69503e-07	0.000292845	6.39599e-07	1.11138e-07	1.62877e-05	5.11212e-05	2.01903e-08	0.00408251	8.7223e-09	2.10792e-08	3.63047e-05	6.77825e-05
H15	1.26363e-05	2.3631e-06	6.34641e-05	1.91539e-07	0.000303384	7.7879e-08	0.00481123	5.45563e-08	4.18542e-05	5.35555e-06	3.04593e-08	9.67572e-08	6.77826e-05	8.7223e-09	0.00413007	0.000168377	5.19346e-09	2.77438e-09
H16	1.09135e-05	4.96826e-06	6.35278e-05	1.48361e-07	0.000301856	1.14195e-07	0.00483585	9.61528e-08	4.7983e-06	8.00039e-06	1.07052e-08	6.30758e-08	3.63053e-05	2.10792e-08	0.000168377	0.00409345	6.06261e-09	5.19276e-09
H17	4.96826e-06	1.09129e-05	1.4846e-07	6.35397e-05	1.14208e-07	0.000301814	9.61552e-08	0.00483595	6.3079e-08	1.0707e-08	8.00016e-06	4.79776e-06	2.10786e-08	3.63047e-05	5.19346e-09	6.06261e-09	0.00409349	0.000168381
H18	2.36323e-06	1.2636e-05	1.91579e-07	6.35202e-05	7.78796e-08	0.000303446	5.45531e-08	0.00481119	9.67818e-08	3.04661e-08	5.35556e-06	4.18519e-05	8.72101e-09	6.77825e-05	2.77438e-09	5.19276e-09	0.000168381	0.00413006
Weighted LDM — diallyl_disufide_18_LIDI_matrix (× 0)
	S1	S2	C3	C4	C5	C6	C7	C8	H9	H10	H11	H12	H13	H14	H15	H16	H17	H18	Total
S1	0	0	0	0	0	0	0	0	0	0	0	0	0	0	0	0	0	0	0
S2	0	0	0	0	0	0	0	0	0	0	0	0	0	0	0	0	0	0
C3	0	0	0	0	0	0	0	0	0	0	0	0	0	0	0	0	0	0
C4	0	0	0	0	0	0	0	0	0	0	0	0	0	0	0	0	0	0
C5	0	0	0	0	0	0	0	0	0	0	0	0	0	0	0	0	0	0
C6	0	0	0	0	0	0	0	0	0	0	0	0	0	0	0	0	0	0
C7	0	0	0	0	0	0	0	0	0	0	0	0	0	0	0	0	0	0
C8	0	0	0	0	0	0	0	0	0	0	0	0	0	0	0	0	0	0
H9	0	0	0	0	0	0	0	0	0	0	0	0	0	0	0	0	0	0
H10	0	0	0	0	0	0	0	0	0	0	0	0	0	0	0	0	0	0
H11	0	0	0	0	0	0	0	0	0	0	0	0	0	0	0	0	0	0
H12	0	0	0	0	0	0	0	0	0	0	0	0	0	0	0	0	0	0
H13	0	0	0	0	0	0	0	0	0	0	0	0	0	0	0	0	0	0
H14	0	0	0	0	0	0	0	0	0	0	0	0	0	0	0	0	0	0
H15	0	0	0	0	0	0	0	0	0	0	0	0	0	0	0	0	0	0
H16	0	0	0	0	0	0	0	0	0	0	0	0	0	0	0	0	0	0
H17	0	0	0	0	0	0	0	0	0	0	0	0	0	0	0	0	0	0
H18	0	0	0	0	0	0	0	0	0	0	0	0	0	0	0	0	0	0
Weighted LDM — diallyl_disufide_19_LIDI_matrix (× 0)
	S1	S2	C3	C4	C5	C6	C7	C8	H9	H10	H11	H12	H13	H14	H15	H16	H17	H18	Total
S1	0	0	0	0	0	0	0	0	0	0	0	0	0	0	0	0	0	0	0
S2	0	0	0	0	0	0	0	0	0	0	0	0	0	0	0	0	0	0
C3	0	0	0	0	0	0	0	0	0	0	0	0	0	0	0	0	0	0
C4	0	0	0	0	0	0	0	0	0	0	0	0	0	0	0	0	0	0
C5	0	0	0	0	0	0	0	0	0	0	0	0	0	0	0	0	0	0
C6	0	0	0	0	0	0	0	0	0	0	0	0	0	0	0	0	0	0
C7	0	0	0	0	0	0	0	0	0	0	0	0	0	0	0	0	0	0
C8	0	0	0	0	0	0	0	0	0	0	0	0	0	0	0	0	0	0
H9	0	0	0	0	0	0	0	0	0	0	0	0	0	0	0	0	0	0
H10	0	0	0	0	0	0	0	0	0	0	0	0	0	0	0	0	0	0
H11	0	0	0	0	0	0	0	0	0	0	0	0	0	0	0	0	0	0
H12	0	0	0	0	0	0	0	0	0	0	0	0	0	0	0	0	0	0
H13	0	0	0	0	0	0	0	0	0	0	0	0	0	0	0	0	0	0
H14	0	0	0	0	0	0	0	0	0	0	0	0	0	0	0	0	0	0
H15	0	0	0	0	0	0	0	0	0	0	0	0	0	0	0	0	0	0
H16	0	0	0	0	0	0	0	0	0	0	0	0	0	0	0	0	0	0
H17	0	0	0	0	0	0	0	0	0	0	0	0	0	0	0	0	0	0
H18	0	0	0	0	0	0	0	0	0	0	0	0	0	0	0	0	0	0
Weighted LDM — diallyl_disufide_20_LIDI_matrix (× 0)
	S1	S2	C3	C4	C5	C6	C7	C8	H9	H10	H11	H12	H13	H14	H15	H16	H17	H18	Total
S1	0	0	0	0	0	0	0	0	0	0	0	0	0	0	0	0	0	0	0
S2	0	0	0	0	0	0	0	0	0	0	0	0	0	0	0	0	0	0
C3	0	0	0	0	0	0	0	0	0	0	0	0	0	0	0	0	0	0
C4	0	0	0	0	0	0	0	0	0	0	0	0	0	0	0	0	0	0
C5	0	0	0	0	0	0	0	0	0	0	0	0	0	0	0	0	0	0
C6	0	0	0	0	0	0	0	0	0	0	0	0	0	0	0	0	0	0
C7	0	0	0	0	0	0	0	0	0	0	0	0	0	0	0	0	0	0
C8	0	0	0	0	0	0	0	0	0	0	0	0	0	0	0	0	0	0
H9	0	0	0	0	0	0	0	0	0	0	0	0	0	0	0	0	0	0
H10	0	0	0	0	0	0	0	0	0	0	0	0	0	0	0	0	0	0
H11	0	0	0	0	0	0	0	0	0	0	0	0	0	0	0	0	0	0
H12	0	0	0	0	0	0	0	0	0	0	0	0	0	0	0	0	0	0
H13	0	0	0	0	0	0	0	0	0	0	0	0	0	0	0	0	0	0
H14	0	0	0	0	0	0	0	0	0	0	0	0	0	0	0	0	0	0
H15	0	0	0	0	0	0	0	0	0	0	0	0	0	0	0	0	0	0
H16	0	0	0	0	0	0	0	0	0	0	0	0	0	0	0	0	0	0
H17	0	0	0	0	0	0	0	0	0	0	0	0	0	0	0	0	0	0
H18	0	0	0	0	0	0	0	0	0	0	0	0	0	0	0	0	0	0
Weighted LDM — diallyl_disufide_21_LIDI_matrix (× 0)
	S1	S2	C3	C4	C5	C6	C7	C8	H9	H10	H11	H12	H13	H14	H15	H16	H17	H18	Total
S1	0	0	0	0	0	0	0	0	0	0	0	0	0	0	0	0	0	0	0
S2	0	0	0	0	0	0	0	0	0	0	0	0	0	0	0	0	0	0
C3	0	0	0	0	0	0	0	0	0	0	0	0	0	0	0	0	0	0
C4	0	0	0	0	0	0	0	0	0	0	0	0	0	0	0	0	0	0
C5	0	0	0	0	0	0	0	0	0	0	0	0	0	0	0	0	0	0
C6	0	0	0	0	0	0	0	0	0	0	0	0	0	0	0	0	0	0
C7	0	0	0	0	0	0	0	0	0	0	0	0	0	0	0	0	0	0
C8	0	0	0	0	0	0	0	0	0	0	0	0	0	0	0	0	0	0
H9	0	0	0	0	0	0	0	0	0	0	0	0	0	0	0	0	0	0
H10	0	0	0	0	0	0	0	0	0	0	0	0	0	0	0	0	0	0
H11	0	0	0	0	0	0	0	0	0	0	0	0	0	0	0	0	0	0
H12	0	0	0	0	0	0	0	0	0	0	0	0	0	0	0	0	0	0
H13	0	0	0	0	0	0	0	0	0	0	0	0	0	0	0	0	0	0
H14	0	0	0	0	0	0	0	0	0	0	0	0	0	0	0	0	0	0
H15	0	0	0	0	0	0	0	0	0	0	0	0	0	0	0	0	0	0
H16	0	0	0	0	0	0	0	0	0	0	0	0	0	0	0	0	0	0
H17	0	0	0	0	0	0	0	0	0	0	0	0	0	0	0	0	0	0
H18	0	0	0	0	0	0	0	0	0	0	0	0	0	0	0	0	0	0
Weighted LDM — diallyl_disufide_22_LIDI_matrix (× 0)
	S1	S2	C3	C4	C5	C6	C7	C8	H9	H10	H11	H12	H13	H14	H15	H16	H17	H18	Total
S1	0	0	0	0	0	0	0	0	0	0	0	0	0	0	0	0	0	0	0
S2	0	0	0	0	0	0	0	0	0	0	0	0	0	0	0	0	0	0
C3	0	0	0	0	0	0	0	0	0	0	0	0	0	0	0	0	0	0
C4	0	0	0	0	0	0	0	0	0	0	0	0	0	0	0	0	0	0
C5	0	0	0	0	0	0	0	0	0	0	0	0	0	0	0	0	0	0
C6	0	0	0	0	0	0	0	0	0	0	0	0	0	0	0	0	0	0
C7	0	0	0	0	0	0	0	0	0	0	0	0	0	0	0	0	0	0
C8	0	0	0	0	0	0	0	0	0	0	0	0	0	0	0	0	0	0
H9	0	0	0	0	0	0	0	0	0	0	0	0	0	0	0	0	0	0
H10	0	0	0	0	0	0	0	0	0	0	0	0	0	0	0	0	0	0
H11	0	0	0	0	0	0	0	0	0	0	0	0	0	0	0	0	0	0
H12	0	0	0	0	0	0	0	0	0	0	0	0	0	0	0	0	0	0
H13	0	0	0	0	0	0	0	0	0	0	0	0	0	0	0	0	0	0
H14	0	0	0	0	0	0	0	0	0	0	0	0	0	0	0	0	0	0
H15	0	0	0	0	0	0	0	0	0	0	0	0	0	0	0	0	0	0
H16	0	0	0	0	0	0	0	0	0	0	0	0	0	0	0	0	0	0
H17	0	0	0	0	0	0	0	0	0	0	0	0	0	0	0	0	0	0
H18	0	0	0	0	0	0	0	0	0	0	0	0	0	0	0	0	0	0

## Sheet: FD
Frobenius_Distance_Full_MATRIX
Conformer ID	1	2	3	4	5	6	7	8	9	10	11	12	13	14	15	16	17	18	19	20	21	22
1	0	0.0505175	0.0453946	0.0492872	0.0576467	0.0452364	0.0642691	0.0726035	0.0438321	0.058947	0.0473543	0.0714461	0.05866	0.0519968	0.0729035	0.048475	0.0524597	0.0563939	0.0575515	0.0575996	0.0529239	0.0588197
2	0.0505175	0	0.0551213	0.0517462	0.056229	0.0499054	0.056558	0.0841673	0.0551785	0.0551147	0.0556935	0.0477836	0.0520895	0.0521302	0.0815728	0.0533801	0.0534578	0.0527783	0.0516725	0.0548922	0.0513966	0.0560587
3	0.0453946	0.0551213	0	0.054508	0.0639871	0.0598479	0.0489501	0.0828383	0.0657732	0.0452884	0.0649818	0.0666849	0.0559682	0.0415328	0.0546233	0.0441385	0.0413414	0.0548969	0.0542878	0.0490176	0.0458414	0.0566994
4	0.0492872	0.0517462	0.054508	0	0.047878	0.0563693	0.0540992	0.0627329	0.0447183	0.0562376	0.0502034	0.0615857	0.0498757	0.0464504	0.0829151	0.0507387	0.0442557	0.0476544	0.0410732	0.0471448	0.0415007	0.0517448
5	0.0576467	0.056229	0.0639871	0.047878	0	0.0587436	0.0657307	0.0782021	0.058179	0.0613704	0.0455378	0.0606566	0.0505734	0.0444836	0.0858555	0.0537647	0.0569418	0.058854	0.050557	0.0418276	0.0504209	0.0460542
6	0.0452364	0.0499054	0.0598479	0.0563693	0.0587436	0	0.0508974	0.0739921	0.0426564	0.0450449	0.0433454	0.0755216	0.0574888	0.0592002	0.0798319	0.0591552	0.0552882	0.0512311	0.0518595	0.0535067	0.0532647	0.0528965
7	0.0642691	0.056558	0.0489501	0.0540992	0.0657307	0.0508974	0	0.0797733	0.0669837	0.0350852	0.0682337	0.0664742	0.0583883	0.05686	0.069661	0.0574415	0.0551143	0.0514347	0.052404	0.0540472	0.0531961	0.0539196
8	0.0726035	0.0841673	0.0828383	0.0627329	0.0782021	0.0739921	0.0797733	0	0.0654717	0.0848364	0.0705256	0.09416	0.0811417	0.0798642	0.100265	0.080447	0.074758	0.0740627	0.0756385	0.0789113	0.0744915	0.0793627
9	0.0438321	0.0551785	0.0657732	0.0447183	0.058179	0.0426564	0.0669837	0.0654717	0	0.0623468	0.0386161	0.0684572	0.0556299	0.055898	0.0906084	0.0566708	0.0460988	0.0443528	0.0473345	0.0522037	0.0466662	0.0534409
10	0.058947	0.0551147	0.0452884	0.0562376	0.0613704	0.0450449	0.0350852	0.0848364	0.0623468	0	0.0617957	0.0666783	0.051327	0.0495075	0.0689004	0.0565926	0.0504493	0.0542799	0.0451468	0.0446625	0.0444527	0.0523237
11	0.0473543	0.0556935	0.0649818	0.0502034	0.0455378	0.0433454	0.0682337	0.0705256	0.0386161	0.0617957	0	0.0663002	0.0515219	0.0483705	0.0878436	0.0474957	0.0499652	0.0498136	0.0531625	0.0437222	0.0490835	0.0434978
12	0.0714461	0.0477836	0.0666849	0.0615857	0.0606566	0.0755216	0.0664742	0.09416	0.0684572	0.0666783	0.0663002	0	0.0561166	0.0518494	0.0937391	0.0525845	0.0593958	0.0539212	0.0566815	0.052358	0.0568954	0.0495145
13	0.05866	0.0520895	0.0559682	0.0498757	0.0505734	0.0574888	0.0583883	0.0811417	0.0556299	0.051327	0.0515219	0.0561166	0	0.0367254	0.0823692	0.0437861	0.0478958	0.0464767	0.0339275	0.0373635	0.0398946	0.0454574
14	0.0519968	0.0521302	0.0415328	0.0464504	0.0444836	0.0592002	0.05686	0.0798642	0.055898	0.0495075	0.0483705	0.0518494	0.0367254	0	0.0726831	0.0377791	0.0341763	0.0461663	0.0432791	0.0268238	0.0339309	0.038779
15	0.0729035	0.0815728	0.0546233	0.0829151	0.0858555	0.0798319	0.069661	0.100265	0.0906084	0.0689004	0.0878436	0.0937391	0.0823692	0.0726831	0	0.073854	0.071615	0.0813995	0.0823129	0.0769995	0.0764887	0.0816265
16	0.048475	0.0533801	0.0441385	0.0507387	0.0537647	0.0591552	0.0574415	0.080447	0.0566708	0.0565926	0.0474957	0.0525845	0.0437861	0.0377791	0.073854	0	0.0415188	0.0387175	0.0483232	0.04176	0.044012	0.0319579
17	0.0524597	0.0534578	0.0413414	0.0442557	0.0569418	0.0552882	0.0551143	0.074758	0.0460988	0.0504493	0.0499652	0.0593958	0.0478958	0.0341763	0.071615	0.0415188	0	0.0326481	0.0419359	0.0357842	0.0251697	0.0452075
18	0.0563939	0.0527783	0.0548969	0.0476544	0.058854	0.0512311	0.0514347	0.0740627	0.0443528	0.0542799	0.0498136	0.0539212	0.0464767	0.0461663	0.0813995	0.0387175	0.0326481	0	0.0369494	0.0436292	0.0356078	0.0357503
19	0.0575515	0.0516725	0.0542878	0.0410732	0.050557	0.0518595	0.052404	0.0756385	0.0473345	0.0451468	0.0531625	0.0566815	0.0339275	0.0432791	0.0823129	0.0483232	0.0419359	0.0369494	0	0.0356476	0.0273495	0.041638
20	0.0575996	0.0548922	0.0490176	0.0471448	0.0418276	0.0535067	0.0540472	0.0789113	0.0522037	0.0446625	0.0437222	0.052358	0.0373635	0.0268238	0.0769995	0.04176	0.0357842	0.0436292	0.0356476	0	0.0303347	0.0295196
21	0.0529239	0.0513966	0.0458414	0.0415007	0.0504209	0.0532647	0.0531961	0.0744915	0.0466662	0.0444527	0.0490835	0.0568954	0.0398946	0.0339309	0.0764887	0.044012	0.0251697	0.0356078	0.0273495	0.0303347	0	0.0428245
22	0.0588197	0.0560587	0.0566994	0.0517448	0.0460542	0.0528965	0.0539196	0.0793627	0.0534409	0.0523237	0.0434978	0.0495145	0.0454574	0.038779	0.0816265	0.0319579	0.0452075	0.0357503	0.041638	0.0295196	0.0428245	0
