# Supplementary material for: Comparative Analysis of Molecular Conformers Using Localization–Delocalization Matrices and Frobenius Distance
Source: Research Square preprint supplement (doi:10.21203/rs.3.rs-7999250/v1), 2025-11-18
Supplement: Supplementary file 5 [file af0608fc47bb20b313442ad2.xlsx]

## Sheet: Boltzmann_distribution
Conformer ID	E (HF)	Delta E(HF)	HF (Kcal/mol)	Boltzman distribution	Boltzman's weight	Boltzman%	Conformer_type	FD_R	FD_W
1	-1621.09	0	0	1	0.307328	0.307328	8 RCP	0	0.0567611	92.284	31.7158
2	-1621.09	0.000664	0.416662	0.497156	0.15279	0.15279	acyclic	0.131271	0.0917815	92.2934	31.7073
3	-1621.09	0.001428	0.896074	0.222473	0.068372	0.068372	3RCP	0.0974486	0.0835592	92.2625	31.7368						Conformer ID	HF (Kcal/mol)	Boltzman%	Conformer_type	FD_R	FD_W
4	-1621.09	0.001983	1.24434	0.124049	0.0381236	0.0381236	acyclic	0.0531076	0.0778049	92.2645	31.7356						1	0	0.307328	8 RCP	0	0.0567611	92.284	31.7158
5	-1621.09	0.002054	1.28889	0.115117	0.0353786	0.0353786	4RCP	0.148004	0.10916	92.2571	31.7417						2	0.416662	0.15279	acyclic	0.131271	0.0917815	92.2934	31.7073
6	-1621.09	0.002167	1.3598	0.102209	0.0314116	0.0314116	7RCP	0.116512	0.0853243	92.2888	31.7193						3	0.896074	0.068372	3RCP	0.0974486	0.0835592	92.2625	31.7368
7	-1621.09	0.002178	1.3667	0.101032	0.03105	0.03105	acyclic	0.105652	0.0856887	92.2906	31.7091						4	1.24434	0.0381236	acyclic	0.0531076	0.0778049	92.2645	31.7356
8	-1621.09	0.002269	1.4238	0.0918047	0.0282141	0.0282141	4RCP	0.118213	0.0902927	92.2629	31.7355						5	1.28889	0.0353786	4RCP	0.148004	0.10916	92.2571	31.7417
9	-1621.09	0.002316	1.4533	0.0873739	0.0268524	0.0268524	acyclic	0.122075	0.0839441	92.2728	31.7283						6	1.3598	0.0314116	7RCP	0.116512	0.0853243	92.2888	31.7193
10	-1621.09	0.00252	1.58131	0.0704913	0.0216639	0.0216639	3RCP	0.0936206	0.0866553	92.2676	31.733						7	1.3667	0.03105	acyclic	0.105652	0.0856887	92.2906	31.7091
11	-1621.09	0.002671	1.67606	0.0601333	0.0184806	0.0184806	7RCP	0.124287	0.10457	92.2831	31.715						8	1.4238	0.0282141	4RCP	0.118213	0.0902927	92.2629	31.7355
12	-1621.09	0.002797	1.75513	0.052665	0.0161854	0.0161854	3RCP	0.141924	0.105334	92.2589	31.7406						9	1.4533	0.0268524	acyclic	0.122075	0.0839441	92.2728	31.7283
13	-1621.09	0.00281	1.76328	0.0519493	0.0159655	0.0159655	3RCP	0.111644	0.0853219	92.3012	31.7008						10	1.58131	0.0216639	3RCP	0.0936206	0.0866553	92.2676	31.733
14	-1621.09	0.002852	1.78964	0.0497029	0.0152751	0.0152751	acyclic	0.115505	0.0853828	92.2795	31.7195						11	1.67606	0.0184806	7RCP	0.124287	0.10457	92.2831	31.715
15	-1621.09	0.002996	1.88	0.0427131	0.0131269	0.0131269	5RCP	0.126457	0.0993994	92.2598	31.7399						12	1.75513	0.0161854	3RCP	0.141924	0.105334	92.2589	31.7406
16	-1621.09	0.003111	1.95216	0.0378439	0.0116305	0.0116305	4RCP	0.161729	0.121309	92.2516	31.7485						13	1.76328	0.0159655	3RCP	0.111644	0.0853219	92.3012	31.7008
17	-1621.09	0.003114	1.95404	0.0377246	0.0115938	0.0115938	3RCP	0.128299	0.0907139	92.2629	31.738						14	1.78964	0.0152751	acyclic	0.115505	0.0853828	92.2795	31.7195
18	-1621.09	0.003216	2.01805	0.0338845	0.0104137	0.0104137	4RCP	0.133338	0.100229	92.2802	31.7207						15	1.88	0.0131269	5RCP	0.126457	0.0993994	92.2598	31.7399
19	-1621.09	0.003292	2.06574	0.0312797	0.00961312	0.00961312	3RCP	0.129409	0.0987223	92.2735	31.7272						16	1.95216	0.0116305	4RCP	0.161729	0.121309	92.2516	31.7485
20	-1621.09	0.003319	2.08268	0.0304033	0.00934379	0.00934379	2RCP	0.14468	0.114158	92.2794	31.7182						17	1.95404	0.0115938	3RCP	0.128299	0.0907139	92.2629	31.738
21	-1621.09	0.003401	2.13414	0.0278895	0.0085712	0.0085712	3RCP	0.137137	0.0978631	92.2906	31.7089						18	2.01805	0.0104137	4RCP	0.133338	0.100229	92.2802	31.7207
22	-1621.09	0.003423	2.14794	0.0272511	0.00837502	0.00837502	6RCP	0.12705	0.102551	92.298	31.7017						19	2.06574	0.00961312	3RCP	0.129409	0.0987223	92.2735	31.7272
23	-1621.09	0.003647	2.2885	0.0215276	0.00661603	0.00661603	acyclic	0.0891358	0.0746413	92.3061	31.6949						20	2.08268	0.00934379	2RCP	0.14468	0.114158	92.2794	31.7182
24	-1621.09	0.003716	2.3318	0.0200197	0.0061526	0.0061526	6RCP	0.0976394	0.0737903	92.2966	31.7062						21	2.13414	0.0085712	3RCP	0.137137	0.0978631	92.2906	31.7089
25	-1621.09	0.003842	2.41087	0.0175333	0.00538847	0.00538847	4RCP	0.130796	0.0977219	92.2706	31.7308						22	2.14794	0.00837502	6RCP	0.12705	0.102551	92.298	31.7017
26	-1621.09	0.003937	2.47048	0.015865	0.00487575	0.00487575	6RCP	0.0868015	0.0714688	92.3	31.7						23	2.2885	0.00661603	acyclic	0.0891358	0.0746413	92.3061	31.6949
27	-1621.09	0.003958	2.48366	0.0155182	0.00476917	0.00476917	2RCP	0.131674	0.0900894	92.3055	31.6948						24	2.3318	0.0061526	6RCP	0.0976394	0.0737903	92.2966	31.7062
28	-1621.09	0.004076	2.5577	0.0137058	0.00421218	0.00421218	5RCP	0.132732	0.108033	92.2865	31.7134						25	2.41087	0.00538847	4RCP	0.130796	0.0977219	92.2706	31.7308
29	-1621.09	0.004167	2.61481	0.012454	0.00382747	0.00382747	1RCP	0.129777	0.0928296	92.2752	31.7247						26	2.47048	0.00487575	6RCP	0.0868015	0.0714688	92.3	31.7
30	-1621.09	0.0042	2.63551	0.0120289	0.00369681	0.00369681	5RCP	0.123768	0.0907563	92.2733	31.7244						27	2.48366	0.00476917	2RCP	0.131674	0.0900894	92.3055	31.6948
31	-1621.09	0.004357	2.73403	0.0101968	0.00313375	0.00313375	1RCP	0.125848	0.0981045	92.2818	31.7164						28	2.5577	0.00421218	5RCP	0.132732	0.108033	92.2865	31.7134
32	-1621.09	0.004421	2.77419	0.00953255	0.00292962	0.00292962	2RCP	0.124356	0.0917647	92.3097	31.6925						29	2.61481	0.00382747	1RCP	0.129777	0.0928296	92.2752	31.7247
33	-1621.09	0.004591	2.88087	0.00797084	0.00244966	0.00244966	4RCP	0.105436	0.0841601	92.3074	31.6925						30	2.63551	0.00369681	5RCP	0.123768	0.0907563	92.2733	31.7244
34	-1621.09	0.004626	2.90283	0.00768256	0.00236106	0.00236106	acyclic	0.126917	0.0886891	92.2945	31.7066						31	2.73403	0.00313375	1RCP	0.125848	0.0981045	92.2818	31.7164
35	-1621.09	0.004664	2.92667	0.00738136	0.0022685	0.0022685	3RCP	0.155868	0.129445	92.2752	31.7241						32	2.77419	0.00292962	2RCP	0.124356	0.0917647	92.3097	31.6925
36	-1621.09	0.004682	2.93797	0.00724284	0.00222592	0.00222592	1RCP	0.131894	0.0984591	92.2995	31.7014						33	2.88087	0.00244966	4RCP	0.105436	0.0841601	92.3074	31.6925
37	-1621.09	0.004691	2.94362	0.00717456	0.00220494	0.00220494	1RCP	0.112059	0.079765	92.3068	31.6932						34	2.90283	0.00236106	acyclic	0.126917	0.0886891	92.2945	31.7066
38	-1621.09	0.004736	2.97185	0.00684268	0.00210294	0.00210294	5RCP	0.128303	0.0888146	92.2915	31.7083						35	2.92667	0.0022685	3RCP	0.155868	0.129445	92.2752	31.7241
39	-1621.09	0.004798	3.01076	0.00641042	0.0019701	0.0019701	1RCP	0.12896	0.0951966	92.3045	31.6952						36	2.93797	0.00222592	1RCP	0.131894	0.0984591	92.2995	31.7014
40	-1621.09	0.004802	3.01327	0.00638349	0.00196182	0.00196182	5RCP	0.140832	0.110405	92.2579	31.7402						37	2.94362	0.00220494	1RCP	0.112059	0.079765	92.3068	31.6932
41	-1621.09	0.004814	3.0208	0.00630337	0.0019372	0.0019372	3RCP	0.129379	0.112547	92.2764	31.7233						38	2.97185	0.00210294	5RCP	0.128303	0.0888146	92.2915	31.7083
42	-1621.09	0.004824	3.02707	0.00623738	0.00191692	0.00191692	1RCP	0.106856	0.0902918	92.3008	31.6978						39	3.01076	0.0019701	1RCP	0.12896	0.0951966	92.3045	31.6952
43	-1621.09	0.004835	3.03398	0.00616558	0.00189485	0.00189485	1RCP	0.107847	0.0790139	92.304	31.6961						40	3.01327	0.00196182	5RCP	0.140832	0.110405	92.2579	31.7402
44	-1621.09	0.004872	3.05719	0.0059301	0.00182248	0.00182248	6RCP	0.116763	0.0835484	92.2963	31.7044						41	3.0208	0.0019372	3RCP	0.129379	0.112547	92.2764	31.7233
45	-1621.09	0.004938	3.09861	0.00553215	0.00170018	0.00170018	3RCP	0.106095	0.0759809	92.3008	31.698						42	3.02707	0.00191692	1RCP	0.106856	0.0902918	92.3008	31.6978
46	-1621.09	0.004948	3.10488	0.00547423	0.00168238	0.00168238	6RCP	0.112929	0.0850791	92.2771	31.724						43	3.03398	0.00189485	1RCP	0.107847	0.0790139	92.304	31.6961
47	-1621.09	0.004967	3.11681	0.00536585	0.00164907	0.00164907	4RCP	0.122605	0.0869231	92.2765	31.7226						44	3.05719	0.00182248	6RCP	0.116763	0.0835484	92.2963	31.7044
48	-1621.09	0.005003	3.1394	0.00516634	0.00158776	0.00158776	3RCP	0.102058	0.0721581	92.3038	31.6964						45	3.09861	0.00170018	3RCP	0.106095	0.0759809	92.3008	31.698
49	-1621.09	0.00501	3.14379	0.00512842	0.00157611	0.00157611	acyclic	0.105187	0.0759281	92.3012	31.6979						46	3.10488	0.00168238	6RCP	0.112929	0.0850791	92.2771	31.724
50	-1621.09	0.00521	3.26929	0.00415495	0.00127693	0.00127693	2RCP	0.119126	0.0961395	92.2712	31.7299						47	3.11681	0.00164907	4RCP	0.122605	0.0869231	92.2765	31.7226
51	-1621.09	0.00536	3.36342	0.00354815	0.00109045	0.00109045	2RCP	0.149555	0.107336	92.3259	31.6753						48	3.1394	0.00158776	3RCP	0.102058	0.0721581	92.3038	31.6964
52	-1621.09	0.005433	3.40922	0.00328575	0.0010098	0.0010098	2RCP	0.159366	0.121462	92.2966	31.7019						49	3.14379	0.00157611	acyclic	0.105187	0.0759281	92.3012	31.6979
53	-1621.09	0.005451	3.42052	0.00322409	0.000990852	0.000990852	2RCP	0.140488	0.10405	92.2489	31.7563						50	3.26929	0.00127693	2RCP	0.119126	0.0961395	92.2712	31.7299
54	-1621.09	0.005453	3.42177	0.00321731	0.000988769	0.000988769	6RCP	0.145349	0.112264	92.235	31.7685
55	-1621.09	0.005482	3.43997	0.0031206	0.000959045	0.000959045	1RCP	0.128478	0.0904242	92.2909	31.7089
56	-1621.09	0.005493	3.44687	0.00308468	0.000948006	0.000948006	1RCP	0.12021	0.0895023	92.3025	31.6969
57	-1621.09	0.005498	3.45001	0.00306849	0.000943031	0.000943031	acyclic	0.10922	0.078896	92.2943	31.7056
58	-1621.09	0.005573	3.49707	0.00283558	0.000871453	0.000871453	3RCP	0.158496	0.120317	92.2515	31.7483
59	-1621.09	0.005598	3.51276	0.00276195	0.000848822	0.000848822	2RCP	0.14513	0.103671	92.3035	31.6964
60	-1621.09	0.005719	3.58869	0.00243169	0.000747324	0.000747324	2RCP	0.120958	0.09206	92.271	31.7289
61	-1621.09	0.005726	3.59308	0.00241384	0.000741839	0.000741839	acyclic	0.123534	0.0899401	92.3021	31.6967
62	-1621.09	0.005777	3.62508	0.00228769	0.000703069	0.000703069	5RCP	0.14234	0.116917	92.2602	31.7368
63	-1621.09	0.005799	3.63889	0.00223532	0.000686977	0.000686977	acyclic	0.120586	0.0901683	92.3004	31.6991
64	-1621.09	0.005842	3.66587	0.00213641	0.000656579	0.000656579	2RCP	0.0776993	0.0696499	92.3171	31.6828
65	-1621.09	0.005855	3.67403	0.00210738	0.000647657	0.000647657	acyclic	0.108584	0.0796373	92.3046	31.6947
66	-1621.09	0.005863	3.67905	0.00208971	0.000642227	0.000642227	4RCP	0.0863215	0.0850626	92.3091	31.6884
67	-1621.09	0.005952	3.7349	0.00190286	0.0005848	0.0005848	2RCP	0.133298	0.0987127	92.3134	31.687
68	-1621.09	0.005972	3.74745	0.00186322	0.000572619	0.000572619	3RCP	0.116968	0.0875419	92.3012	31.6972
69	-1621.09	0.005983	3.75435	0.00184177	0.000566028	0.000566028	2RCP	0.119818	0.0828515	92.3155	31.685
70	-1621.09	0.006065	3.80581	0.00168949	0.000519226	0.000519226	acyclic	0.121298	0.0843077	92.3097	31.6896
71	-1621.09	0.006085	3.81836	0.00165429	0.00050841	0.00050841	3RCP	0.125605	0.0932123	92.2928	31.7063
72	-1621.09	0.006331	3.97272	0.00127694	0.000392438	0.000392438	4RCP	0.129333	0.0964968	92.2747	31.725
73	-1621.09	0.006336	3.97586	0.00127023	0.000390378	0.000390378	3RCP	0.110123	0.0873747	92.2929	31.7073
74	-1621.09	0.006341	3.979	0.00126357	0.000388329	0.000388329	1RCP	0.133936	0.0974378	92.2863	31.713
75	-1621.09	0.006342	3.97962	0.00126224	0.00038792	0.00038792	2RCP	0.134032	0.0974491	92.2866	31.7136
76	-1621.09	0.006393	4.01163	0.00119627	0.000367647	0.000367647	2RCP	0.139088	0.103861	92.2805	31.7205
77	-1621.09	0.006398	4.01476	0.00118999	0.000365717	0.000365717	2RCP	0.114239	0.081268	92.3111	31.6875
78	-1621.09	0.006401	4.01665	0.00118624	0.000364564	0.000364564	2RCP	0.0777392	0.0720649	92.3116	31.6892
79	-1621.09	0.00642	4.02857	0.00116275	0.000357347	0.000357347	1RCP	0.11888	0.0969695	92.329	31.6698
80	-1621.09	0.006449	4.04677	0.0011278	0.000346604	0.000346604	1RCP	0.108936	0.0707188	92.3397	31.6622
81	-1621.09	0.006452	4.04865	0.00112425	0.000345512	0.000345512	1RCP	0.11887	0.0857594	92.337	31.6631
82	-1621.09	0.006458	4.05241	0.00111717	0.000343337	0.000343337	1RCP	0.0950727	0.0709538	92.3287	31.6717
83	-1621.09	0.00651	4.08504	0.00105767	0.000325051	0.000325051	1RCP	0.12328	0.0882507	92.3353	31.6643
84	-1621.09	0.006534	4.1001	0.00103129	0.000316943	0.000316943	1RCP	0.0971623	0.0688456	92.3377	31.6633
85	-1621.09	0.006549	4.10952	0.00101513	0.000311979	0.000311979	3RCP	0.142621	0.122758	92.2519	31.7492
86	-1621.09	0.006551	4.11077	0.001013	0.000311323	0.000311323	1RCP	0.12812	0.090818	92.3255	31.6725
87	-1621.09	0.006597	4.13964	0.000965124	0.000296609	0.000296609	1RCP	0.120397	0.100643	92.3184	31.6803
88	-1621.09	0.006602	4.14277	0.000960059	0.000295053	0.000295053	2RCP	0.134451	0.101326	92.2922	31.7085
89	-1621.09	0.00668	4.19172	0.000884392	0.000271798	0.000271798	2RCP	0.132495	0.102085	92.3063	31.6928
90	-1621.09	0.006728	4.22184	0.000840823	0.000258408	0.000258408	7RCP	0.127595	0.0937274	92.2761	31.7262
91	-1621.09	0.006741	4.23	0.000829397	0.000254897	0.000254897	2RCP	0.0785585	0.0728991	92.3358	31.6634
92	-1621.09	0.006751	4.23627	0.000820713	0.000252228	0.000252228	2RCP	0.107461	0.0800613	92.3358	31.6638
93	-1621.09	0.006763	4.2438	0.000810413	0.000249062	0.000249062	1RCP	0.122032	0.0860465	92.3034	31.699
94	-1621.09	0.0068	4.26702	0.000779461	0.00023955	0.00023955	3RCP	0.12207	0.0873625	92.2992	31.7025
95	-1621.09	0.006925	4.34546	0.000683373	0.00021002	0.00021002	2RCP	0.0903149	0.0800041	92.3187	31.6807
96	-1621.09	0.00693	4.3486	0.000679787	0.000208917	0.000208917	2RCP	0.129589	0.0962236	92.2841	31.7156
97	-1621.09	0.006954	4.36366	0.00066283	0.000203706	0.000203706	3RCP	0.126958	0.0931849	92.3028	31.6985
98	-1621.09	0.007123	4.4697	0.000554823	0.000170512	0.000170512	2RCP	0.125472	0.0968931	92.2849	31.7167
99	-1621.09	0.007128	4.47284	0.000551911	0.000169617	0.000169617	1RCP	0.111812	0.0789604	92.3284	31.6728
100	-1621.09	0.007153	4.48853	0.000537578	0.000165213	0.000165213	2RCP	0.130137	0.101325	92.2837	31.7188
101	-1621.09	0.007182	4.50673	0.000521418	0.000160246	0.000160246	1RCP	0.103083	0.0857607	92.3105	31.6895
102	-1621.09	0.00728	4.56822	0.000470318	0.000144542	0.000144542	acyclic	0.113028	0.0875558	92.3197	31.6804
103	-1621.09	0.007306	4.58454	0.000457622	0.00014064	0.00014064	3RCP	0.107356	0.0808849	92.2962	31.7049
104	-1621.09	0.007317	4.59144	0.000452355	0.000139021	0.000139021	2RCP	0.126909	0.089366	92.3098	31.6888
105	-1621.09	0.007358	4.61717	0.00043325	0.00013315	0.00013315	acyclic	0.122266	0.0954989	92.3196	31.6788
106	-1621.09	0.007381	4.6316	0.000422888	0.000129965	0.000129965	2RCP	0.111789	0.0846132	92.3279	31.6701
107	-1621.09	0.00739	4.63725	0.000418901	0.00012874	0.00012874	acyclic	0.117168	0.0837411	92.3356	31.6633
108	-1621.09	0.007412	4.65105	0.000409313	0.000125793	0.000125793	3RCP	0.120679	0.0908838	92.2799	31.722
109	-1621.09	0.007435	4.66548	0.000399524	0.000122785	0.000122785	acyclic	0.126949	0.0893877	92.3165	31.6826
110	-1621.09	0.007442	4.66988	0.000396591	0.000121883	0.000121883	2RCP	0.148356	0.109538	92.2991	31.7005
111	-1621.09	0.007542	4.73263	0.000356972	0.000109707	0.000109707	3RCP	0.122311	0.0953136	92.2927	31.7059
112	-1621.09	0.007598	4.76777	0.00033654	0.000103428	0.000103428	2RCP	0.117384	0.0884328	92.286	31.7126
113	-1621.09	0.007621	4.7822	0.000328491	0.000100954	0.000100954	1RCP	0.128004	0.0915085	92.3011	31.6981
114	-1621.09	0.007643	4.79601	0.000320973	9.86438e-05	9.86438e-05	3RCP	0.14089	0.104867	92.267	31.7328
115	-1621.09	0.007674	4.81546	0.000310669	9.54772e-05	9.54772e-05	acyclic	0.139356	0.106904	92.2576	31.743
116	-1621.09	0.007704	4.83428	0.000301013	9.25097e-05	9.25097e-05	acyclic	0.138972	0.105404	92.3013	31.7002
117	-1621.09	0.007719	4.8437	0.000296298	9.10607e-05	9.10607e-05	acyclic	0.123771	0.0903934	92.2737	31.733
118	-1621.09	0.007776	4.87946	0.000279046	8.57584e-05	8.57584e-05	5RCP	0.135368	0.101261	92.2823	31.7165
119	-1621.09	0.007786	4.88574	0.000276124	8.48606e-05	8.48606e-05	2RCP	0.0958704	0.0848536	92.3363	31.664
120	-1621.09	0.007802	4.89578	0.000271513	8.34435e-05	8.34435e-05	2RCP	0.141228	0.111587	92.3068	31.6949
121	-1621.09	0.007823	4.90896	0.000265578	8.16194e-05	8.16194e-05	3RCP	0.111254	0.0825226	92.2775	31.7221
122	-1621.09	0.007868	4.93719	0.000253293	7.78439e-05	7.78439e-05	1RCP	0.125143	0.0833473	92.3413	31.6612
123	-1621.09	0.007876	4.94221	0.000251169	7.71912e-05	7.71912e-05	5RCP	0.126847	0.0936122	92.2684	31.7327
124	-1621.09	0.007883	4.94661	0.000249325	7.66246e-05	7.66246e-05	acyclic	0.120441	0.0845758	92.311	31.6938
125	-1621.09	0.00792	4.96982	0.000239803	7.3698e-05	7.3698e-05	3RCP	0.121289	0.0836501	92.315	31.6845
126	-1621.09	0.007925	4.97296	0.000238544	7.33112e-05	7.33112e-05	acyclic	0.144427	0.107668	92.2993	31.6999
127	-1621.09	0.008002	5.02128	0.000219975	6.76044e-05	6.76044e-05	2RCP	0.116805	0.0888841	92.2874	31.7125
128	-1621.09	0.008005	5.02316	0.000219281	6.73912e-05	6.73912e-05	1RCP	0.100009	0.0791059	92.3296	31.6688
129	-1621.09	0.008042	5.04638	0.000210906	6.48173e-05	6.48173e-05	acyclic	0.114944	0.0854134	92.2801	31.7218
130	-1621.09	0.008148	5.11289	0.000188642	5.79749e-05	5.79749e-05	2RCP	0.088041	0.086992	92.3253	31.6738
131	-1621.09	0.008166	5.12419	0.000185102	5.68869e-05	5.68869e-05	2RCP	0.110112	0.0797039	92.32	31.6804
132	-1621.09	0.008176	5.13046	0.000183164	5.62913e-05	5.62913e-05	5RCP	0.134744	0.100998	92.2783	31.7216
133	-1621.09	0.008191	5.13988	0.000180295	5.54096e-05	5.54096e-05	4RCP	0.132572	0.0999697	92.2701	31.7281
134	-1621.09	0.00825	5.1769	0.00016944	5.20735e-05	5.20735e-05	4RCP	0.129962	0.0960373	92.2912	31.7074
135	-1621.09	0.008262	5.18443	0.000167313	5.14199e-05	5.14199e-05	2RCP	0.149688	0.114654	92.2957	31.7021
136	-1621.09	0.008393	5.26663	0.000145764	4.47974e-05	4.47974e-05	3RCP	0.122144	0.0884849	92.3025	31.6959
137	-1621.09	0.008431	5.29048	0.00014005	4.30411e-05	4.30411e-05	3RCP	0.122683	0.1007	92.2947	31.7057
138	-1621.09	0.008438	5.29487	0.000139022	4.27252e-05	4.27252e-05	6RCP	0.12652	0.0981853	92.2754	31.7226
139	-1621.09	0.008441	5.29675	0.000138583	4.25905e-05	4.25905e-05	acyclic	0.126864	0.092368	92.3222	31.6774
140	-1621.09	0.008446	5.29989	0.000137856	4.23669e-05	4.23669e-05	3RCP	0.125393	0.08689	92.3109	31.6889
141	-1621.09	0.008462	5.30993	0.000135554	4.16595e-05	4.16595e-05	1RCP	0.127521	0.0863027	92.3335	31.6683
142	-1621.09	0.0085	5.33378	0.000130239	4.00262e-05	4.00262e-05	acyclic	0.115061	0.0809144	92.3224	31.6783
143	-1621.09	0.008502	5.33503	0.000129966	3.9942e-05	3.9942e-05	acyclic	0.125556	0.0932359	92.3246	31.675
144	-1621.09	0.008525	5.34946	0.000126857	3.89868e-05	3.89868e-05	3RCP	0.123858	0.09155	92.2855	31.7108
145	-1621.09	0.008542	5.36013	0.000124608	3.82954e-05	3.82954e-05	acyclic	0.115045	0.0880501	92.3279	31.67
146	-1621.09	0.00858	5.38398	0.000119722	3.6794e-05	3.6794e-05	acyclic	0.116809	0.0851747	92.2958	31.7028
147	-1621.09	0.0086	5.39653	0.000117229	3.60276e-05	3.60276e-05	1RCP	0.129203	0.0913466	92.3269	31.6719
148	-1621.09	0.008629	5.41472	0.000113705	3.49446e-05	3.49446e-05	acyclic	0.106562	0.0822974	92.3574	31.644
149	-1621.09	0.008636	5.41912	0.00011287	3.46881e-05	3.46881e-05	1RCP	0.10574	0.0846878	92.3226	31.6782
150	-1621.09	0.008664	5.43669	0.000109592	3.36807e-05	3.36807e-05	acyclic	0.11643	0.0882982	92.3449	31.6551
151	-1621.09	0.008714	5.46806	0.000103974	3.19541e-05	3.19541e-05	acyclic	0.116953	0.0815086	92.3204	31.6777
152	-1621.09	0.008729	5.47747	0.000102346	3.14536e-05	3.14536e-05	2RCP	0.126797	0.0901459	92.3054	31.6939
153	-1621.09	0.008733	5.47998	0.000101916	3.13215e-05	3.13215e-05	1RCP	0.133845	0.100483	92.3294	31.6705
154	-1621.09	0.008742	5.48563	0.000100955	3.10262e-05	3.10262e-05	3RCP	0.114962	0.0887726	92.2936	31.7059
155	-1621.09	0.008745	5.48751	0.000100637	3.09284e-05	3.09284e-05	2RCP	0.134068	0.102405	92.27	31.7285
156	-1621.09	0.008764	5.49944	9.86441e-05	3.03161e-05	3.03161e-05	acyclic	0.120978	0.0888754	92.3575	31.6416
157	-1621.09	0.008767	5.50132	9.83331e-05	3.02205e-05	3.02205e-05	acyclic	0.118571	0.0861906	92.3282	31.6715
158	-1621.09	0.008777	5.50759	9.73036e-05	2.99041e-05	2.99041e-05	acyclic	0.121415	0.0900917	92.3123	31.6884
159	-1621.09	0.008842	5.54838	9.08695e-05	2.79267e-05	2.79267e-05	3RCP	0.115235	0.0762269	92.3127	31.6868
160	-1621.09	0.008912	5.59231	8.44155e-05	2.59432e-05	2.59432e-05	1RCP	0.111301	0.0867638	92.3413	31.6596
161	-1621.09	0.008926	5.60109	8.31807e-05	2.55637e-05	2.55637e-05	1RCP	0.1205	0.0892294	92.2812	31.7165
162	-1621.09	0.008942	5.61113	8.17917e-05	2.51369e-05	2.51369e-05	2RCP	0.127337	0.0896528	92.3121	31.686
163	-1621.09	0.008959	5.6218	8.03413e-05	2.46911e-05	2.46911e-05	1RCP	0.143519	0.108103	92.3118	31.6883
164	-1621.09	0.008975	5.63184	7.89997e-05	2.42788e-05	2.42788e-05	3RCP	0.135048	0.101193	92.2782	31.7218
165	-1621.09	0.008986	5.63874	7.80904e-05	2.39993e-05	2.39993e-05	3RCP	0.110345	0.0863903	92.3065	31.696
166	-1621.09	0.008988	5.64	7.79261e-05	2.39489e-05	2.39489e-05	acyclic	0.119876	0.0893065	92.3147	31.6838
167	-1621.09	0.008993	5.64313	7.75171e-05	2.38232e-05	2.38232e-05	acyclic	0.128085	0.0931531	92.3106	31.6888
168	-1621.09	0.008996	5.64502	7.72728e-05	2.37481e-05	2.37481e-05	acyclic	0.13227	0.100288	92.2879	31.711
169	-1621.09	0.009028	5.6651	7.47136e-05	2.29616e-05	2.29616e-05	acyclic	0.118613	0.0808712	92.3515	31.6472
170	-1621.09	0.00903	5.66635	7.45565e-05	2.29133e-05	2.29133e-05	6RCP	0.113952	0.084105	92.3007	31.6998
171	-1621.09	0.009041	5.67325	7.36983e-05	2.26495e-05	2.26495e-05	acyclic	0.119763	0.0848585	92.3402	31.6584
172	-1621.09	0.009066	5.68894	7.17844e-05	2.20613e-05	2.20613e-05	ACYCLIC	0.124891	0.0951236	92.342	31.6582
173	-1621.09	0.009078	5.69647	7.08835e-05	2.17845e-05	2.17845e-05	acyclic	0.114397	0.0862141	92.3536	31.6486
174	-1621.09	0.00908	5.69773	7.07345e-05	2.17387e-05	2.17387e-05	acyclic	0.115032	0.0920062	92.3292	31.671
175	-1621.09	0.009117	5.72094	6.80329e-05	2.09084e-05	2.09084e-05	acyclic	0.119048	0.0819599	92.3504	31.6488
176	-1621.09	0.009125	5.72596	6.74624e-05	2.07331e-05	2.07331e-05	acyclic	0.133613	0.106011	92.293	31.7633
177	-1621.09	0.00913	5.7291	6.71083e-05	2.06243e-05	2.06243e-05	2RCP	0.112037	0.0825742	92.3129	31.6882
178	-1621.09	0.009167	5.75232	6.45452e-05	1.98365e-05	1.98365e-05	ACYCLIC	0.131422	0.0986844	92.3175	31.6828
179	-1621.09	0.009198	5.77177	6.24733e-05	1.91998e-05	1.91998e-05	acyclic	0.123098	0.0925657	92.352	31.6468
180	-1621.09	0.009221	5.78621	6.09792e-05	1.87406e-05	1.87406e-05	2RCP	0.110191	0.0747334	92.3186	31.682
181	-1621.09	0.009228	5.7906	6.05316e-05	1.8603e-05	1.8603e-05	2RCP	0.13204	0.0958459	92.2985	31.701
182	-1621.09	0.009244	5.80064	5.95207e-05	1.82924e-05	1.82924e-05	acyclic	0.132276	0.0981226	92.3155	31.6858
183	-1621.09	0.00927	5.81695	5.79141e-05	1.77986e-05	1.77986e-05	3RCP	0.114874	0.0890625	92.3139	31.6852
184	-1621.09	0.009302	5.83703	5.5996e-05	1.72091e-05	1.72091e-05	ACYLIC	0.124598	0.0905448	92.3349	31.6637
185	-1621.09	0.009346	5.86464	5.3462e-05	1.64304e-05	1.64304e-05	4RCP	0.121843	0.0873334	92.3089	31.691
186	-1621.09	0.009351	5.86778	5.31814e-05	1.63441e-05	1.63441e-05	1RCP	0.111777	0.0881206	92.3308	31.6668
187	-1621.09	0.009371	5.88033	5.20737e-05	1.60037e-05	1.60037e-05	acyclic	0.124625	0.0943418	92.3214	31.679
188	-1621.09	0.009391	5.89288	5.0989e-05	1.56703e-05	1.56703e-05	4RCP	0.125706	0.0893063	92.3065	31.6933
189	-1621.09	0.009458	5.93492	4.75173e-05	1.46034e-05	1.46034e-05	ACYCLIC	0.127268	0.0923639	92.3335	31.6639
190	-1621.09	0.009474	5.94496	4.67238e-05	1.43595e-05	1.43595e-05	3RCP	0.112049	0.0897731	92.312	31.6876
191	-1621.09	0.009476	5.94622	4.66255e-05	1.43293e-05	1.43293e-05	3RCP	0.120301	0.0903074	92.2836	31.7165
192	-1621.09	0.009535	5.98324	4.38183e-05	1.34666e-05	1.34666e-05	1RCP	0.108367	0.0914443	92.3202	31.679
193	-1621.09	0.009589	6.01713	4.13974e-05	1.27226e-05	1.27226e-05	1RCP	0.134676	0.101249	92.3012	31.6989
194	-1621.09	0.00959	6.01775	4.13538e-05	1.27092e-05	1.27092e-05	acyclic	0.122934	0.0914294	92.3199	31.6798
195	-1621.09	0.009696	6.08427	3.69883e-05	1.13675e-05	1.13675e-05	3RCP	0.138032	0.103296	92.2789	31.7189
196	-1621.09	0.009716	6.09682	3.62178e-05	1.11307e-05	1.11307e-05	1RCP	0.131408	0.0944125	92.3341	31.6678
197	-1621.09	0.00974	6.11188	3.53144e-05	1.08531e-05	1.08531e-05	acyclic	0.127111	0.0946587	92.3033	31.6965
198	-1621.09	0.009783	6.13886	3.37518e-05	1.03729e-05	1.03729e-05	1RCP	0.132636	0.100838	92.3054	31.6949
199	-1621.09	0.009789	6.14263	3.35394e-05	1.03076e-05	1.03076e-05	1RCP	0.119474	0.0911292	92.3172	31.6848
200	-1621.09	0.009809	6.15518	3.28407e-05	1.00929e-05	1.00929e-05	acyclic	0.128826	0.0961247	92.3066	31.6937
201	-1621.09	0.009826	6.16584	3.22584e-05	9.91389e-06	9.91389e-06	3RCP	0.1292	0.0938483	92.3031	31.6962
202	-1621.09	0.009838	6.17337	3.18535e-05	9.78947e-06	9.78947e-06	Acylic	0.108053	0.0750687	92.3651	31.6349
203	-1621.08	0.009872	6.19471	3.07338e-05	9.44535e-06	9.44535e-06	acyclic	0.116054	0.0827858	92.3532	31.6468
204	-1621.08	0.009873	6.19534	3.07015e-05	9.43541e-06	9.43541e-06	1RCP	0.121872	0.0897889	92.3375	31.6634
205	-1621.08	0.009878	6.19847	3.05403e-05	9.38589e-06	9.38589e-06	3RCP	0.128173	0.0912339	92.3048	31.7018
206	-1621.08	0.009893	6.20789	3.0062e-05	9.23888e-06	9.23888e-06	acyclic	0.128485	0.0946801	92.3051	31.6939
207	-1621.08	0.009918	6.22357	2.92813e-05	8.99895e-06	8.99895e-06	2RCP	0.106365	0.0819971	92.3224	31.6759
208	-1621.08	0.009941	6.23801	2.8581e-05	8.78373e-06	8.78373e-06	acyclic	0.132134	0.0973593	92.3014	31.6978
209	-1621.08	0.009947	6.24177	2.84011e-05	8.72843e-06	8.72843e-06	1RCP	0.130661	0.0968469	92.306	31.6925
210	-1621.08	0.009956	6.24742	2.81333e-05	8.64615e-06	8.64615e-06	4RCP	0.126741	0.092596	92.3032	31.6966
211	-1621.08	0.00996	6.24993	2.80151e-05	8.60982e-06	8.60982e-06	acyclic	0.110415	0.0779816	92.3658	31.6347
212	-1621.08	0.010031	6.29448	2.5998e-05	7.98989e-06	7.98989e-06	acyclic	0.127148	0.0956825	92.3295	31.6706
213	-1621.08	0.010051	6.30703	2.54564e-05	7.82346e-06	7.82346e-06	1RCP	0.13371	0.0957739	92.322	31.6769
214	-1621.08	0.010075	6.32209	2.48215e-05	7.62832e-06	7.62832e-06	5RCP	0.125618	0.0891798	92.2999	31.7008
215	-1621.08	0.010083	6.32711	2.46133e-05	7.56436e-06	7.56436e-06	acyclic	0.137034	0.103102	92.3119	31.6883
216	-1621.08	0.010163	6.37731	2.26258e-05	6.95353e-06	6.95353e-06	acyclic	0.118495	0.0830439	92.357	31.6431
217	-1621.08	0.010191	6.39488	2.19687e-05	6.7516e-06	6.7516e-06	2rcp	0.143708	0.105552	92.2991	31.7031
218	-1621.08	0.010221	6.41371	2.12859e-05	6.54175e-06	6.54175e-06	1RCP	0.12789	0.0915469	92.324	31.6747
219	-1621.08	0.010227	6.41747	2.11519e-05	6.50057e-06	6.50057e-06	1RCP	0.104847	0.0764852	92.3254	31.6738
220	-1621.08	0.010228	6.4181	2.11297e-05	6.49373e-06	6.49373e-06	acyclic	0.139928	0.104767	92.3094	31.6898
221	-1621.08	0.010235	6.42249	2.09746e-05	6.44607e-06	6.44607e-06	acyclic	0.111675	0.0787877	92.3607	31.6381
222	-1621.08	0.010239	6.425	2.08865e-05	6.41898e-06	6.41898e-06	acyclic	0.11282	0.0832317	92.3501	31.6504
223	-1621.08	0.010252	6.43316	2.06026e-05	6.33176e-06	6.33176e-06	acyclic	0.133697	0.0991698	92.3018	31.6985
224	-1621.08	0.010262	6.43944	2.03869e-05	6.26547e-06	6.26547e-06	acyclic	0.121844	0.0874001	92.3454	31.6528
225	-1621.08	0.010342	6.48964	1.87406e-05	5.75952e-06	5.75952e-06	acyclic	0.118821	0.0942239	92.32	31.6796
226	-1621.08	0.010354	6.49717	1.85054e-05	5.68723e-06	5.68723e-06	acyclic	0.117342	0.0836765	92.3599	31.6394
227	-1621.08	0.010378	6.51223	1.80439e-05	5.54538e-06	5.54538e-06	acyclic	0.120026	0.0816278	92.3457	31.6565
228	-1621.08	0.01039	6.51976	1.78174e-05	5.47578e-06	5.47578e-06	acyclic	0.124747	0.0867798	92.3343	31.6661
229	-1621.08	0.010447	6.55552	1.67799e-05	5.15694e-06	5.15694e-06	2RCP	0.10785	0.0869632	92.3233	31.6742
230	-1621.08	0.010491	6.58313	1.60206e-05	4.92357e-06	4.92357e-06	1RCP	0.135691	0.10058	92.3274	31.6723
231	-1621.08	0.010538	6.61263	1.52474e-05	4.68594e-06	4.68594e-06	acyclic	0.118695	0.0815285	92.3445	31.6544
232	-1621.08	0.010555	6.62329	1.4977e-05	4.60284e-06	4.60284e-06	acyclic	0.119055	0.0919681	92.3198	31.6808
233	-1621.08	0.010579	6.63835	1.46034e-05	4.48803e-06	4.48803e-06	acyclic	0.10475	0.076812	92.3587	31.6419
234	-1621.08	0.010632	6.67161	1.38111e-05	4.24454e-06	4.24454e-06	acyclic	0.119418	0.085233	92.3467	31.6531
235	-1621.08	0.010649	6.68228	1.35662e-05	4.16927e-06	4.16927e-06	acyclic	0.114007	0.0790127	92.3481	31.6501
236	-1621.08	0.010685	6.70487	1.30618e-05	4.01425e-06	4.01425e-06	1RCP	0.127563	0.0949415	92.3306	31.6702
237	-1621.08	0.010702	6.71554	1.28302e-05	3.94307e-06	3.94307e-06	acyclic	0.109336	0.0781971	92.3592	31.6405
238	-1621.08	0.01071	6.72056	1.27226e-05	3.91001e-06	3.91001e-06	2RCP	0.125985	0.0870668	92.3175	31.6805
239	-1621.08	0.010711	6.72118	1.27092e-05	3.90589e-06	3.90589e-06	ACYCLIC	0.135647	0.101126	92.3017	31.6983
240	-1621.08	0.010724	6.72934	1.25365e-05	3.85281e-06	3.85281e-06	acyclic	0.11872	0.0818956	92.346	31.6531
241	-1621.08	0.010742	6.74064	1.23012e-05	3.78051e-06	3.78051e-06	acyclic	0.117576	0.0834812	92.3362	31.6628
242	-1621.08	0.010798	6.77578	1.15972e-05	3.56413e-06	3.56413e-06	1RCP	0.11855	0.0853633	92.3261	31.6739
243	-1621.08	0.010835	6.799	1.11542e-05	3.428e-06	3.428e-06	acyclic	0.123421	0.0879254	92.3245	31.6741
244	-1621.08	0.010843	6.80402	1.10607e-05	3.39926e-06	3.39926e-06	acyclic	0.126702	0.0895526	92.3495	31.6478
245	-1621.08	0.010847	6.80653	1.10142e-05	3.38498e-06	3.38498e-06	acyclic	0.124109	0.0902406	92.3146	31.6837
246	-1621.08	0.010888	6.83225	1.05491e-05	3.24202e-06	3.24202e-06	2RCP	0.136098	0.100715	92.3145	31.6892
247	-1621.08	0.010893	6.83539	1.04937e-05	3.225e-06	3.225e-06	acyclic	0.143188	0.104697	92.2997	31.6994
248	-1621.08	0.010931	6.85924	1.00823e-05	3.09857e-06	3.09857e-06	acyclic	0.129234	0.0938813	92.3381	31.6616
249	-1621.08	0.010945	6.86802	9.93482e-06	3.05324e-06	3.05324e-06	acyclic	0.127712	0.0911354	92.349	31.651
250	-1621.08	0.010984	6.89249	9.53528e-06	2.93045e-06	2.93045e-06	1RCP	0.136315	0.099227	92.313	31.6865
251	-1621.08	0.011056	6.93767	8.8394e-06	2.71659e-06	2.71659e-06	acyclic	0.121648	0.0897117	92.3424	31.6558
252	-1621.08	0.011062	6.94144	8.78376e-06	2.69949e-06	2.69949e-06	acyclic	0.118034	0.084939	92.3541	31.646
253	-1621.08	0.011075	6.9496	8.6644e-06	2.66281e-06	2.66281e-06	acyclic	0.115621	0.0847819	92.3677	31.6347
254	-1621.08	0.011099	6.96466	8.44828e-06	2.59639e-06	2.59639e-06	2RCP	0.124075	0.0852429	92.3137	31.6857
255	-1621.08	0.011112	6.97281	8.33347e-06	2.56111e-06	2.56111e-06	2RCP	0.131316	0.0979758	92.3183	31.6816
256	-1621.08	0.011118	6.97658	8.28101e-06	2.54498e-06	2.54498e-06	acyclic	0.117074	0.0880597	92.3551	31.6454
257	-1621.08	0.011163	7.00482	7.89795e-06	2.42726e-06	2.42726e-06	1RCP	0.131774	0.0993972	92.3392	31.6622
258	-1621.08	0.011178	7.01423	7.77424e-06	2.38924e-06	2.38924e-06	acyclic	0.117264	0.084838	92.3672	31.6315
259	-1621.08	0.01118	7.01548	7.7579e-06	2.38422e-06	2.38422e-06	acyclic	0.114375	0.0845226	92.3534	31.648
260	-1621.08	0.011197	7.02615	7.62032e-06	2.34194e-06	2.34194e-06	4RCP	0.129034	0.0937642	92.3002	31.7005
261	-1621.08	0.01131	7.09706	6.76585e-06	2.07933e-06	2.07933e-06	1RCP	0.140503	0.104141	92.3219	31.6779
262	-1621.08	0.011333	7.11149	6.60403e-06	2.0296e-06	2.0296e-06	acyclic	0.120334	0.0845559	92.3362	31.6622
263	-1621.08	0.011487	7.20813	5.61588e-06	1.72591e-06	1.72591e-06	acyclic	0.123522	0.0859032	92.3361	31.6635
264	-1621.08	0.011493	7.21189	5.58052e-06	1.71505e-06	1.71505e-06	1RCP	0.119596	0.0851509	92.3486	31.6524
265	-1621.08	0.011496	7.21377	5.56293e-06	1.70964e-06	1.70964e-06	1RCP	0.125011	0.0913427	92.3358	31.6636
266	-1621.08	0.011534	7.23762	5.34484e-06	1.64262e-06	1.64262e-06	ACYLIC	0.128196	0.0947633	92.3516	31.6471
267	-1621.08	0.011535	7.23825	5.33921e-06	1.64089e-06	1.64089e-06	acyclic	0.118398	0.0888997	92.3632	31.6378
268	-1621.08	0.011567	7.25833	5.16239e-06	1.58654e-06	1.58654e-06	acyclic	0.112383	0.0812853	92.3571	31.6411
269	-1621.08	0.011588	7.2715	5.04954e-06	1.55186e-06	1.55186e-06	acyclic	0.121518	0.0876369	92.3386	31.6612
270	-1621.08	0.011617	7.2897	4.89774e-06	1.50521e-06	1.50521e-06	ACYLIC	0.11045	0.0848158	92.3448	31.6533
271	-1621.08	0.011625	7.29472	4.85668e-06	1.49259e-06	1.49259e-06	1RCP	0.116751	0.084819	92.3476	31.6525
272	-1621.08	0.011641	7.30476	4.77558e-06	1.46767e-06	1.46767e-06	acyclic	0.12072	0.0906413	92.3617	31.6394
273	-1621.08	0.011642	7.30539	4.77055e-06	1.46612e-06	1.46612e-06	acyclic	0.122599	0.0908229	92.3609	31.6378
274	-1621.08	0.011668	7.32171	4.64178e-06	1.42655e-06	1.42655e-06	acyclic	0.126287	0.090768	92.3452	31.6547
275	-1621.08	0.011674	7.32547	4.61256e-06	1.41757e-06	1.41757e-06	1RCP	0.13207	0.0968054	92.3292	31.6706
276	-1621.08	0.011684	7.33175	4.56427e-06	1.40273e-06	1.40273e-06	acyclic	0.10949	0.0806882	92.3574	31.6406
277	-1621.08	0.011689	7.33488	4.54031e-06	1.39536e-06	1.39536e-06	acyclic	0.129321	0.0958417	92.334	31.666
278	-1621.08	0.011811	7.41144	3.9932e-06	1.22722e-06	1.22722e-06	acyclic	0.13102	0.0936068	92.3439	31.6567
279	-1621.08	0.012032	7.55012	3.16449e-06	9.72536e-07	9.72536e-07	acyclic	0.120281	0.0895454	92.3418	31.6573
280	-1621.08	0.012039	7.55451	3.14126e-06	9.65397e-07	9.65397e-07	acyclic	0.113181	0.0857865	92.3534	31.6497
281	-1621.08	0.012147	7.62228	2.80375e-06	8.61669e-07	8.61669e-07	acyclic	0.118252	0.0882559	92.3515	31.647
282	-1621.08	0.012162	7.63169	2.75983e-06	8.48172e-07	8.48172e-07	2RCP	0.121135	0.0826977	92.3183	31.6829
283	-1621.08	0.012166	7.6342	2.74824e-06	8.44609e-07	8.44609e-07	1RCP	0.139606	0.104576	92.3037	31.6951
284	-1621.08	0.012444	7.80865	2.05108e-06	6.30355e-07	6.30355e-07	acyclic	0.131804	0.0935406	92.3327	31.664
				3.25386	1					2.25575	120.795

## Sheet: LDM
LDM — ajoene_e_1_LIDI_matrix
	S1	S2	S3	O4	C5	C6	C7	C8	C9	C10	C11	C12	C13	H14	H15	H16	H17	H18	H19	H20	H21	H22	H23	H24	H25	H26	H27		N_loc (trace)	Off-diagonal sum	N_deloc = 2?Off
S1	12.9474	0.00178868	0.00311048	0.680764	0.460818	0.468604	0.0290891	0.0277266	0.0189404	0.0139875	0.000516109	4.83717e-05	0.000470029	0.022276	0.0190595	0.0226807	0.0229857	0.00126951	0.00482218	0.000742944	6.89237e-05	0.00126664	0.000932604	0.000762663	4.50051e-05	0.00108171	5.07235e-05		92.284	31.7158	63.4316	124
S2	0.00178868	14.5648	0.640292	0.000493119	0.00914354	0.000355577	0.0522663	0.000105957	0.569797	0.00036078	0.0371379	0.0179804	0.009352	0.00153057	0.00083635	0.000829179	2.85119e-05	0.0119873	1.87521e-05	0.0283557	0.00910499	0.00226489	1.54859e-05	0.000599543	0.0011539	0.000327528	0.00031422
S3	0.00311048	0.640292	14.649	0.00149102	0.00182499	0.00209239	0.0237749	0.000175866	0.0474862	0.000360828	0.529883	0.0376805	0.0193915	0.000361719	0.000153463	0.00722012	0.000161163	0.00135422	0.000123423	0.00340239	0.0284428	0.0266341	3.86137e-05	0.00140937	0.00778136	0.00106261	0.00159168
O4	0.680764	0.000493119	0.00149102	8.34209	0.0610528	0.0617719	0.0172253	0.00923886	0.0036501	0.00486936	0.00641903	0.000824543	0.0065207	0.0028632	0.00774093	0.00406246	0.00601227	0.00717656	0.000735793	0.000297019	0.000315047	0.0154373	0.000578656	0.000254579	0.000439934	0.0146505	0.000545871
C5	0.460818	0.00914354	0.00182499	0.0610528	4.07415	0.0231503	0.518763	0.0067236	0.0357043	0.00411267	0.000169234	7.2137e-05	0.00020711	0.467075	0.459369	0.00313571	0.00458826	0.0171007	0.000316017	0.00509382	2.26411e-05	0.000207383	0.000102959	0.000202132	1.0027e-05	0.000195169	6.05893e-06
C6	0.468604	0.000355577	0.00209239	0.0617719	0.0231503	4.07613	0.00605795	0.519871	0.00534099	0.0371769	0.0013396	0.000120954	3.57664e-05	0.00488333	0.00303408	0.449697	0.461473	0.000166698	0.0197421	0.000765895	6.73439e-05	0.00358511	0.00627771	0.00585467	6.19278e-05	9.20511e-05	2.41696e-06
C7	0.0290891	0.0522663	0.0237749	0.0172253	0.518763	0.00605795	3.94533	0.000582128	0.874913	0.00042429	0.00335393	0.000974385	0.00225763	0.0189436	0.0172251	0.00694252	0.000635509	0.456452	0.000122045	0.0265455	0.000501325	0.00493434	2.32805e-05	0.000379805	0.000105997	0.00184033	5.36956e-05
C8	0.0277266	0.000105957	0.000175866	0.00923886	0.0067236	0.519871	0.000582128	3.98339	0.000617234	0.916902	0.000136283	1.70704e-05	1.55253e-05	0.000617799	0.0100556	0.0166382	0.0187998	0.000142152	0.47355	0.0011045	6.43633e-06	0.000349716	0.0299159	0.0297667	9.42603e-06	2.84419e-05	1.27926e-06
C9	0.0189404	0.569797	0.0474862	0.0036501	0.0357043	0.00534099	0.874913	0.000617234	4.08421	0.00155266	0.00461364	0.000736352	0.000458525	0.00750423	0.00544021	0.0103133	0.000481306	0.0262512	0.000169778	0.464799	0.000638642	0.00374077	9.01773e-05	0.00302372	0.000144351	0.000273605	2.3627e-05
C10	0.0139875	0.00036078	0.000360828	0.00486936	0.00411267	0.0371769	0.00042429	0.916902	0.00155266	4.07914	3.61817e-05	1.05033e-05	1.15973e-05	0.000319973	0.00800652	0.00560373	0.0102295	0.000170023	0.0295198	0.00437782	4.21135e-06	6.86197e-05	0.482752	0.476725	1.28069e-06	1.76416e-05	9.51699e-07
C11	0.000516109	0.0371379	0.529883	0.00641903	0.000169234	0.0013396	0.00335393	0.000136283	0.00461364	3.61817e-05	4.02469	0.515782	0.0373643	2.98898e-05	2.25567e-05	0.00328069	0.000133985	0.000759812	5.29441e-05	0.000289843	0.462605	0.448309	2.23583e-06	5.99715e-05	0.0200084	0.00553722	0.00633041
C12	4.83717e-05	0.0179804	0.0376805	0.000824543	7.2137e-05	0.000120954	0.000974385	1.70704e-05	0.000736352	1.05033e-05	0.515782	3.96978	0.9175	5.3271e-06	3.7164e-05	0.000329727	2.16621e-05	0.00237737	4.65461e-06	0.000218996	0.019227	0.0171583	5.7094e-07	3.08682e-05	0.473288	0.0283572	0.0307273
C13	0.000470029	0.009352	0.0193915	0.0065207	0.00020711	3.57664e-05	0.00225763	1.55253e-05	0.000458525	1.15973e-05	0.0373643	0.9175	4.08996	1.10903e-05	7.55414e-05	4.72999e-05	4.23292e-06	0.00604202	3.41209e-06	0.000165258	0.0103479	0.00592548	6.82e-07	1.33986e-05	0.0290047	0.467868	0.484941
H14	0.022276	0.00153057	0.000361719	0.0028632	0.467075	0.00488333	0.0189436	0.000617799	0.00750423	0.000319973	2.98898e-05	5.3271e-06	1.10903e-05	0.392733	0.0143167	0.00021596	0.00091311	0.00160776	1.83457e-05	0.000395716	7.60002e-06	2.82272e-05	7.84473e-06	1.67125e-05	1.01783e-06	9.52822e-06	3.36983e-07
H15	0.0190595	0.00083635	0.000153463	0.00774093	0.459369	0.00303408	0.0172251	0.0100556	0.00544021	0.00800652	2.25567e-05	3.7164e-05	7.55414e-05	0.0143167	0.378951	0.000209669	0.000359486	0.00424479	0.000281775	0.00307006	3.32589e-06	2.5341e-05	0.000184146	0.000431923	1.92605e-06	5.3683e-05	1.61409e-06
H16	0.0226807	0.000829179	0.00722012	0.00406246	0.00313571	0.449697	0.00694252	0.0166382	0.0103133	0.00560373	0.00328069	0.000329727	4.72999e-05	0.00021596	0.000209669	0.365159	0.0137391	0.000132521	0.00468048	0.00160028	0.000151467	0.00537037	0.000393185	0.00335904	0.000130819	2.25882e-05	3.14821e-06
H17	0.0229857	2.85119e-05	0.000161163	0.00601227	0.00458826	0.461473	0.000635509	0.0187998	0.000481306	0.0102295	0.000133985	2.16621e-05	4.23292e-06	0.00091311	0.000359486	0.0137391	0.3842	1.69453e-05	0.0012113	8.94343e-05	2.11672e-05	0.000338221	0.000766601	0.000482143	7.8896e-06	4.39e-06	4.61168e-07
H18	0.00126951	0.0119873	0.00135422	0.00717656	0.0171007	0.000166698	0.456452	0.000142152	0.0262512	0.000170023	0.000759812	0.00237737	0.00604202	0.00160776	0.00424479	0.000132521	1.69453e-05	0.364142	8.89277e-06	0.00568312	0.000121755	0.000884931	5.72592e-06	0.000110548	0.000106719	0.0037301	0.000201672
H19	0.00482218	1.87521e-05	0.000123423	0.000735793	0.000316017	0.0197421	0.000122045	0.47355	0.000169778	0.0295198	5.29441e-05	4.65461e-06	3.41209e-06	1.83457e-05	0.000281775	0.00468048	0.0012113	8.89277e-06	0.408465	0.000129507	2.21808e-06	0.000116054	0.00366341	0.00658371	3.00047e-06	3.78296e-06	3.51244e-07
H20	0.000742944	0.0283557	0.00340239	0.000297019	0.00509382	0.000765895	0.0265455	0.0011045	0.464799	0.00437782	0.000289843	0.000218996	0.000165258	0.000395716	0.00307006	0.00160028	8.94343e-05	0.00568312	0.000129507	0.388707	3.59175e-05	9.66885e-05	0.000264892	0.00552717	2.08666e-05	6.4551e-05	6.1896e-06
H21	6.89237e-05	0.00910499	0.0284428	0.000315047	2.26411e-05	6.73439e-05	0.000501325	6.43633e-06	0.000638642	4.21135e-06	0.462605	0.019227	0.0103479	7.60002e-06	3.32589e-06	0.000151467	2.11672e-05	0.000121755	2.21808e-06	3.59175e-05	0.397774	0.0139281	2.14893e-07	2.96907e-06	0.00103017	0.000431522	0.000761694
H22	0.00126664	0.00226489	0.0266341	0.0154373	0.000207383	0.00358511	0.00493434	0.000349716	0.00374077	6.86197e-05	0.448309	0.0171583	0.00592548	2.82272e-05	2.5341e-05	0.00537037	0.000338221	0.000884931	0.000116054	9.66885e-05	0.0139281	0.362901	4.38225e-06	2.86921e-05	0.00460154	0.00321572	0.000391838
H23	0.000932604	1.54859e-05	3.86137e-05	0.000578656	0.000102959	0.00627771	2.32805e-05	0.0299159	9.01773e-05	0.482752	2.23583e-06	5.7094e-07	6.82e-07	7.84473e-06	0.000184146	0.000393185	0.000766601	5.72592e-06	0.00366341	0.000264892	2.14893e-07	4.38225e-06	0.405301	0.0162863	1.1561e-07	1.55908e-06	4.60098e-08
H24	0.000762663	0.000599543	0.00140937	0.000254579	0.000202132	0.00585467	0.000379805	0.0297667	0.00302372	0.476725	5.99715e-05	3.08682e-05	1.33986e-05	1.67125e-05	0.000431923	0.00335904	0.000482143	0.000110548	0.00658371	0.00552717	2.96907e-06	2.86921e-05	0.0162863	0.402328	3.02083e-06	2.57875e-06	1.45886e-06
H25	4.50051e-05	0.0011539	0.00778136	0.000439934	1.0027e-05	6.19278e-05	0.000105997	9.42603e-06	0.000144351	1.28069e-06	0.0200084	0.473288	0.0290047	1.01783e-06	1.92605e-06	0.000130819	7.8896e-06	0.000106719	3.00047e-06	2.08666e-05	0.00103017	0.00460154	1.1561e-07	3.02083e-06	0.413698	0.00617911	0.00365762
H26	0.00108171	0.000327528	0.00106261	0.0146505	0.000195169	9.20511e-05	0.00184033	2.84419e-05	0.000273605	1.76416e-05	0.00553722	0.0283572	0.467868	9.52822e-06	5.3683e-05	2.25882e-05	4.39e-06	0.0037301	3.78296e-06	6.4551e-05	0.000431522	0.00321572	1.55908e-06	2.57875e-06	0.00617911	0.37326	0.0156679
H27	5.07235e-05	0.00031422	0.00159168	0.000545871	6.05893e-06	2.41696e-06	5.36956e-05	1.27926e-06	2.3627e-05	9.51699e-07	0.00633041	0.0307273	0.484941	3.36983e-07	1.61409e-06	3.14821e-06	4.61168e-07	0.000201672	3.51244e-07	6.1896e-06	0.000761694	0.000391838	4.60098e-08	1.45886e-06	0.00365762	0.0156679	0.416276
LDM — ajoene_e_2_LIDI_matrix
	S1	S2	S3	O4	C5	C6	C7	C8	C9	C10	C11	C12	C13	H14	H15	H16	H17	H18	H19	H20	H21	H22	H23	H24	H25	H26	H27
S1	12.9521	0.0017755	0.00353535	0.679857	0.460407	0.470701	0.0292952	0.0271652	0.0193037	0.013141	0.000519747	0.000190332	0.00070548	0.0224251	0.0192025	0.0232	0.0222999	0.00133991	0.00532208	0.000741413	0.00122543	4.34781e-05	0.000754812	0.000959515	5.35171e-05	4.49389e-05	0.00106991		92.2934	31.7073	63.4146
S2	0.0017755	14.5909	0.637197	0.000532495	0.00913682	0.000440913	0.0508294	0.00018908	0.569781	0.000534008	0.038514	0.0095703	0.00452952	0.00151881	0.000843389	4.03782e-05	0.000955415	0.0121346	2.29638e-05	0.0285269	0.00470628	0.00606956	0.000549895	1.47717e-05	0.000569128	0.000475677	0.000190089
S3	0.00353535	0.637197	14.6397	0.00146498	0.00187197	0.0046681	0.0249535	0.000344585	0.0489503	0.000962878	0.527202	0.0399081	0.0170685	0.000385961	0.000152049	0.00027896	0.0132261	0.00145578	0.000246498	0.00304404	0.0254992	0.0305598	0.00342321	9.80103e-05	0.00612618	0.00118427	0.000832308
O4	0.679857	0.000532495	0.00146498	8.33967	0.0607278	0.0610492	0.0161709	0.00924701	0.00356193	0.0046282	0.00646709	0.000929428	0.00810196	0.00300216	0.00776907	0.00504752	0.00423484	0.00744019	0.000820721	0.000319034	0.0154986	0.000352878	0.000249887	0.00059405	0.000466132	0.000647896	0.0181382
C5	0.460407	0.00913682	0.00187197	0.0607278	4.07142	0.0226074	0.519108	0.00699868	0.035749	0.0036057	0.000184438	3.97157e-05	0.000146667	0.466922	0.459824	0.00471319	0.00259124	0.0174171	0.000358212	0.00525182	0.000366655	1.32515e-05	0.000166082	0.000100238	1.48048e-05	8.16652e-06	0.000261872
C6	0.470701	0.000440913	0.0046681	0.0610492	0.0226074	4.07824	0.00634518	0.519409	0.00549621	0.0370306	0.00097413	0.00120809	0.00348517	0.0048716	0.00259737	0.458288	0.446088	0.000165212	0.0198541	0.000700967	0.00146736	6.43485e-05	0.00576502	0.00627422	6.23124e-05	0.000103681	0.00285127
C7	0.0292952	0.0508294	0.0249535	0.0161709	0.519108	0.00634518	3.9441	0.000657915	0.873966	0.000511887	0.00391772	0.000525158	0.000274562	0.0188048	0.0173041	0.000703229	0.00648419	0.460481	0.000112095	0.0262341	0.00816164	0.000234658	0.000414048	2.57482e-05	0.000200801	1.61106e-05	4.04202e-05
C8	0.0271652	0.00018908	0.000344585	0.00924701	0.00699868	0.519409	0.000657915	3.98432	0.00106845	0.916932	9.86962e-05	0.000102195	0.000292562	0.000645398	0.0101153	0.01872	0.0162239	0.000149982	0.473593	0.00206678	0.000144152	7.30341e-06	0.0294372	0.0300665	7.20733e-06	8.37868e-06	0.000292618
C9	0.0193037	0.569781	0.0489503	0.00356193	0.035749	0.00549621	0.873966	0.00106845	4.08137	0.00256396	0.00455319	0.00060787	0.000198794	0.00738356	0.00557196	0.000491312	0.00942326	0.0267048	0.000151921	0.463159	0.00424527	0.000542997	0.00313335	0.000102831	0.000183969	1.6688e-05	3.39331e-05
C10	0.013141	0.000534008	0.000962878	0.0046282	0.0036057	0.0370306	0.000511887	0.916932	0.00256396	4.0792	4.43884e-05	4.41308e-05	0.000147802	0.000256889	0.006744	0.0105457	0.0054239	0.000186022	0.0296639	0.00619276	2.3429e-05	1.77559e-05	0.475646	0.483042	4.66027e-06	5.16216e-06	0.00014775
C11	0.000519747	0.038514	0.527202	0.00646709	0.000184438	0.00097413	0.00391772	9.86962e-05	0.00455319	4.43884e-05	4.02483	0.514642	0.0372959	2.22723e-05	3.35832e-05	9.04408e-05	0.00266861	0.00188699	4.08973e-05	0.000339579	0.445751	0.464741	0.000150426	3.23602e-06	0.0199583	0.0063738	0.00545122
C12	0.000190332	0.0095703	0.0399081	0.000929428	3.97157e-05	0.00120809	0.000525158	0.000102195	0.00060787	4.41308e-05	0.514642	3.98465	0.920784	9.71254e-06	5.89736e-06	0.00114041	0.00171326	0.000206708	2.49916e-05	5.38655e-05	0.0166689	0.019252	2.11078e-05	3.8543e-06	0.474631	0.0308578	0.0280597
C13	0.00070548	0.00452952	0.0170685	0.00810196	0.000146667	0.00348517	0.000274562	0.000292562	0.000198794	0.000147802	0.0372959	0.920784	4.09108	2.27411e-05	2.1566e-05	0.00374802	0.00227386	3.49483e-05	4.37178e-05	1.36879e-05	0.00581202	0.0101808	1.74784e-05	1.06587e-05	0.0298189	0.484882	0.46523
H14	0.0224251	0.00151881	0.000385961	0.00300216	0.466922	0.0048716	0.0188048	0.000645398	0.00738356	0.000256889	2.22723e-05	9.71254e-06	2.27411e-05	0.392413	0.0142945	0.000896457	0.000182725	0.00158895	2.25544e-05	0.000397855	3.22327e-05	1.83255e-06	1.20187e-05	6.7559e-06	1.56409e-06	1.04706e-06	1.32833e-05
H15	0.0192025	0.000843389	0.000152049	0.00776907	0.459824	0.00259737	0.0173041	0.0101153	0.00557196	0.006744	3.35832e-05	5.89736e-06	2.1566e-05	0.0142945	0.379918	0.000307051	0.00012545	0.00436969	0.000416813	0.0032481	8.12679e-05	4.33056e-06	0.000239752	0.000161213	1.67915e-06	1.76937e-06	3.97547e-05
H16	0.0232	4.03782e-05	0.00027896	0.00504752	0.00471319	0.458288	0.000703229	0.01872	0.000491312	0.0105457	9.04408e-05	0.00114041	0.00374802	0.000896457	0.000307051	0.381186	0.0133154	1.84849e-05	0.00105505	9.44184e-05	6.02656e-05	3.82412e-05	0.000464661	0.000741923	7.83196e-05	0.000112969	0.00301394
H17	0.0222999	0.000955415	0.0132261	0.00423484	0.00259124	0.446088	0.00648419	0.0162239	0.00942326	0.0054239	0.00266861	0.00171326	0.00227386	0.000182725	0.00012545	0.0133154	0.354696	0.000129311	0.00462393	0.00112176	0.00258149	0.000262839	0.00321915	0.000376873	5.76936e-05	7.76264e-05	0.000724075
H18	0.00133991	0.0121346	0.00145578	0.00744019	0.0174171	0.000165212	0.460481	0.000149982	0.0267048	0.000186022	0.00188699	0.000206708	3.49483e-05	0.00158895	0.00436969	1.84849e-05	0.000129311	0.373163	1.29992e-05	0.00578764	0.00356564	0.000124441	0.000101001	5.85322e-06	7.41426e-05	2.03633e-06	1.39161e-05
H19	0.00532208	2.29638e-05	0.000246498	0.000820721	0.000358212	0.0198541	0.000112095	0.473593	0.000151921	0.0296639	4.08973e-05	2.49916e-05	4.37178e-05	2.25544e-05	0.000416813	0.00105505	0.00462393	1.29992e-05	0.410165	0.000125089	5.74439e-05	2.12654e-06	0.00653779	0.00368752	1.26471e-06	1.65087e-06	2.42847e-05
H20	0.000741413	0.0285269	0.00304404	0.000319034	0.00525182	0.000700967	0.0262341	0.00206678	0.463159	0.00619276	0.000339579	5.38655e-05	1.36879e-05	0.000397855	0.0032481	9.44184e-05	0.00112176	0.00578764	0.000125089	0.384006	0.000136834	0.000124377	0.00537826	0.000258152	6.25268e-06	2.75367e-06	2.62304e-06
H21	0.00122543	0.00470628	0.0254992	0.0154986	0.000366655	0.00146736	0.00816164	0.000144152	0.00424527	2.3429e-05	0.445751	0.0166689	0.00581202	3.22327e-05	8.12679e-05	6.02656e-05	0.00258149	0.00356564	5.74439e-05	0.000136834	0.35694	0.0137469	2.59653e-05	1.30313e-06	0.00457801	0.000398412	0.00301397
H22	4.34781e-05	0.00606956	0.0305598	0.000352878	1.32515e-05	6.43485e-05	0.000234658	7.30341e-06	0.000542997	1.77559e-05	0.464741	0.019252	0.0101808	1.83255e-06	4.33056e-06	3.82412e-05	0.000262839	0.000124441	2.12654e-06	0.000124377	0.0137469	0.395624	8.26914e-05	1.70328e-06	0.00107162	0.000799253	0.000430033
H23	0.000754812	0.000549895	0.00342321	0.000249887	0.000166082	0.00576502	0.000414048	0.0294372	0.00313335	0.475646	0.000150426	2.11078e-05	1.74784e-05	1.20187e-05	0.000239752	0.000464661	0.00321915	0.000101001	0.00653779	0.00537826	2.59653e-05	8.26914e-05	0.398164	0.0162205	1.95016e-06	5.41515e-07	6.70057e-06
H24	0.000959515	1.47717e-05	9.80103e-05	0.00059405	0.000100238	0.00627422	2.57482e-05	0.0300665	0.000102831	0.483042	3.23602e-06	3.8543e-06	1.06587e-05	6.7559e-06	0.000161213	0.000741923	0.000376873	5.85322e-06	0.00368752	0.000258152	1.30313e-06	1.70328e-06	0.0162205	0.406714	3.15614e-07	3.29858e-07	1.32995e-05
H25	5.35171e-05	0.000569128	0.00612618	0.000466132	1.48048e-05	6.23124e-05	0.000200801	7.20733e-06	0.000183969	4.66027e-06	0.0199583	0.474631	0.0298189	1.56409e-06	1.67915e-06	7.83196e-05	5.76936e-05	7.41426e-05	1.26471e-06	6.25268e-06	0.00457801	0.00107162	1.95016e-06	3.15614e-07	0.415518	0.00369096	0.00611147
H26	4.49389e-05	0.000475677	0.00118427	0.000647896	8.16652e-06	0.000103681	1.61106e-05	8.37868e-06	1.6688e-05	5.16216e-06	0.0063738	0.0308578	0.484882	1.04706e-06	1.76937e-06	0.000112969	7.76264e-05	2.03633e-06	1.65087e-06	2.75367e-06	0.000398412	0.000799253	5.41515e-07	3.29858e-07	0.00369096	0.416021	0.0154955
H27	0.00106991	0.000190089	0.000832308	0.0181382	0.000261872	0.00285127	4.04202e-05	0.000292618	3.39331e-05	0.00014775	0.00545122	0.0280597	0.46523	1.32833e-05	3.97547e-05	0.00301394	0.000724075	1.39161e-05	2.42847e-05	2.62304e-06	0.00301397	0.000430033	6.70057e-06	1.32995e-05	0.00611147	0.0154955	0.367173
LDM — ajoene_e_3_LIDI_matrix
	S1	S2	S3	O4	C5	C6	C7	C8	C9	C10	C11	C12	C13	H14	H15	H16	H17	H18	H19	H20	H21	H22	H23	H24	H25	H26	H27
S1	12.9533	0.0041797	0.0015909	0.681013	0.456617	0.466644	0.0301262	0.0272188	0.0211301	0.0146558	0.000663387	9.82555e-05	0.000570378	0.02035	0.0227476	0.0225823	0.0229976	0.0013448	0.00406801	0.000886535	7.31356e-05	0.00120409	0.000932905	0.000774446	4.63419e-05	0.00113833	7.21727e-05		92.2625	31.7368	63.4736
S2	0.0041797	14.5265	0.644048	0.00156721	0.00934451	0.000286985	0.0643794	5.92727e-05	0.582465	6.75212e-05	0.036244	0.0184152	0.0103531	0.00160161	0.00106247	4.79461e-05	0.000366797	0.0113979	1.71875e-05	0.0269161	0.00897584	0.00247386	3.62724e-06	6.22009e-05	0.00109937	0.000377864	0.000336926
S3	0.0015909	0.644048	14.6534	0.00118435	0.00174255	9.68584e-05	0.0141456	1.35584e-05	0.0428343	8.38519e-06	0.528377	0.0382061	0.0204408	0.00010481	0.000166676	1.60986e-05	0.000150694	0.00137897	4.44242e-06	0.0121459	0.027927	0.0273038	8.6655e-07	1.00645e-05	0.00724827	0.00109507	0.00162466
O4	0.681013	0.00156721	0.00118435	8.33278	0.060753	0.0613271	0.016659	0.0092372	0.0164081	0.00526911	0.00609254	0.000856293	0.00699744	0.0080316	0.00339118	0.0052102	0.00432156	0.000432169	0.000654136	0.0033823	0.000323434	0.0142052	0.000567834	0.000277687	0.000445422	0.0156998	0.00060498
C5	0.456617	0.00934451	0.00174255	0.060753	4.05968	0.022583	0.522808	0.00731797	0.0363299	0.00468311	0.000184858	3.60882e-05	7.56262e-05	0.461749	0.46514	0.00468551	0.00267658	0.0184542	0.00030272	0.00563318	2.6714e-05	0.000155011	0.000113482	0.000289138	7.15006e-06	0.000100812	5.00103e-06
C6	0.466644	0.000286985	9.68584e-05	0.0613271	0.022583	4.06979	0.00710219	0.520273	0.00159914	0.0371707	5.23723e-05	0.000369575	0.00232555	0.00198169	0.00489131	0.462375	0.453672	0.00308545	0.019676	0.000161263	8.65492e-06	7.37653e-05	0.00628899	0.00599484	7.47825e-05	0.00465578	0.000127805
C7	0.0301262	0.0643794	0.0141456	0.016659	0.522808	0.00710219	3.95016	0.000913952	0.866293	0.00120368	0.00185924	0.000685552	0.00133688	0.0176523	0.0185455	0.00059823	0.00814571	0.466996	0.000146004	0.0238877	0.000268729	0.00113766	5.72101e-05	0.00157103	5.73258e-05	0.000807997	3.97981e-05
C8	0.0272188	5.92727e-05	1.35584e-05	0.0092372	0.00731797	0.520273	0.000913952	3.9812	0.000231279	0.91627	1.15796e-05	3.33922e-05	0.000204861	0.00957836	0.000775852	0.0188301	0.0169484	0.000838025	0.473693	4.15974e-05	9.94215e-07	1.99308e-05	0.0298701	0.0301123	9.76425e-06	0.000458391	1.08614e-05
C9	0.0211301	0.582465	0.0428343	0.0164081	0.0363299	0.00159914	0.866293	0.000231279	4.07838	0.000203558	0.00528387	0.0014619	0.00169827	0.00588084	0.00660441	0.000194296	0.00191334	0.0287627	7.22309e-05	0.459879	0.000548661	0.00429069	1.24727e-05	0.000223955	0.000156859	0.00075924	5.0185e-05
C10	0.0146558	6.75212e-05	8.38519e-06	0.00526911	0.00468311	0.0371707	0.00120368	0.91627	0.000203558	4.07823	6.15902e-06	7.78288e-06	6.4928e-05	0.00781918	0.000333574	0.00967438	0.00576731	0.0026246	0.0295946	5.67503e-05	4.98381e-07	1.15422e-05	0.482734	0.479152	1.96586e-06	0.000132009	5.48225e-06
C11	0.000663387	0.036244	0.528377	0.00609254	0.000184858	5.23723e-05	0.00185924	1.15796e-05	0.00528387	6.15902e-06	4.0267	0.516416	0.0372909	4.19217e-05	2.33189e-05	9.35808e-06	8.83847e-05	0.000111868	4.31836e-06	0.000812295	0.463533	0.450941	3.19295e-07	1.46212e-06	0.0199436	0.00586634	0.0063296
C12	9.82555e-05	0.0184152	0.0382061	0.000856293	3.60882e-05	0.000369575	0.000685552	3.33922e-05	0.0014619	7.78288e-06	0.516416	3.96599	0.916571	6.66978e-06	8.04111e-06	8.92301e-05	0.00111936	0.000162428	1.63748e-05	0.000193407	0.019263	0.0170921	7.01264e-07	5.9788e-06	0.47359	0.0283395	0.0308124
C13	0.000570378	0.0103531	0.0204408	0.00699744	7.56262e-05	0.00232555	0.00133688	0.000204861	0.00169827	6.4928e-05	0.0372909	0.916571	4.09079	1.00156e-05	1.68929e-05	0.000505215	0.00500133	0.000358321	7.96523e-05	9.44543e-05	0.0100069	0.00580563	3.85791e-06	2.4693e-05	0.0290314	0.465846	0.485609
H14	0.02035	0.00160161	0.00010481	0.0080316	0.461749	0.00198169	0.0176523	0.00957836	0.00588084	0.00781918	4.19217e-05	6.66978e-06	1.00156e-05	0.383834	0.0144465	0.000222199	0.000111699	0.00203659	0.000308501	0.000370358	3.16319e-06	3.06289e-05	0.000183188	0.000348832	1.03293e-06	1.57789e-05	8.03418e-07
H15	0.0227476	0.00106247	0.000166676	0.00339118	0.46514	0.00489131	0.0185455	0.000775852	0.00660441	0.000333574	2.33189e-05	8.04111e-06	1.68929e-05	0.0144465	0.392368	0.000937258	0.00020668	0.00420109	1.84103e-05	0.00313774	3.07826e-06	1.21296e-05	6.07963e-06	3.43287e-05	9.58187e-07	1.32724e-05	7.67052e-07
H16	0.0225823	4.79461e-05	1.60986e-05	0.0052102	0.00468551	0.462375	0.00059823	0.0188301	0.000194296	0.00967438	9.35808e-06	8.92301e-05	0.000505215	0.000222199	0.000937258	0.387221	0.0141458	0.000264903	0.00139905	1.55788e-05	1.03512e-06	5.65568e-06	0.000784023	0.000493297	2.80255e-05	0.00109916	3.20238e-05
H17	0.0229976	0.000366797	0.000150694	0.00432156	0.00267658	0.453672	0.00814571	0.0169484	0.00191334	0.00576731	8.83847e-05	0.00111936	0.00500133	0.000111699	0.00020668	0.0141458	0.374536	0.00506874	0.00478521	0.00010393	2.76572e-05	3.16103e-05	0.000405445	0.00344436	0.000114779	0.0056261	0.000327145
H18	0.0013448	0.0113979	0.00137897	0.000432169	0.0184542	0.00308545	0.466996	0.000838025	0.0287627	0.0026246	0.000111868	0.000162428	0.000358321	0.00203659	0.00420109	0.000264903	0.00506874	0.402534	0.000143457	0.00592415	1.6548e-05	4.76714e-05	0.00019837	0.00310541	6.84498e-06	9.21362e-05	9.97786e-06
H19	0.00406801	1.71875e-05	4.44242e-06	0.000654136	0.00030272	0.019676	0.000146004	0.473693	7.22309e-05	0.0295946	4.31836e-06	1.63748e-05	7.96523e-05	0.000308501	1.84103e-05	0.00139905	0.00478521	0.000143457	0.408445	5.60088e-06	5.9421e-07	3.76875e-06	0.0036667	0.0067109	2.56077e-06	0.000112539	5.09187e-06
H20	0.000886535	0.0269161	0.0121459	0.0033823	0.00563318	0.000161263	0.0238877	4.15974e-05	0.459879	5.67503e-05	0.000812295	0.000193407	9.44543e-05	0.000370358	0.00313774	1.55788e-05	0.00010393	0.00592415	5.60088e-06	0.369918	5.06177e-05	0.000921214	2.67128e-06	8.55529e-05	4.5783e-05	1.83381e-05	4.51611e-06
H21	7.31356e-05	0.00897584	0.027927	0.000323434	2.6714e-05	8.65492e-06	0.000268729	9.94215e-07	0.000548661	4.98381e-07	0.463533	0.019263	0.0100069	3.16319e-06	3.07826e-06	1.03512e-06	2.76572e-05	1.6548e-05	5.9421e-07	5.06177e-05	0.398243	0.0136497	3.74549e-08	2.06562e-07	0.00113193	0.00044044	0.000791089
H22	0.00120409	0.00247386	0.0273038	0.0142052	0.000155011	7.37653e-05	0.00113766	1.99308e-05	0.00429069	1.15422e-05	0.450941	0.0170921	0.00580563	3.06289e-05	1.21296e-05	5.65568e-06	3.16103e-05	4.76714e-05	3.76875e-06	0.000921214	0.0136497	0.355623	8.25894e-07	8.57735e-07	0.00471435	0.00338009	0.000388286
H23	0.000932905	3.62724e-06	8.6655e-07	0.000567834	0.000113482	0.00628899	5.72101e-05	0.0298701	1.24727e-05	0.482734	3.19295e-07	7.01264e-07	3.85791e-06	0.000183188	6.07963e-06	0.000784023	0.000405445	0.00019837	0.0036667	2.67128e-06	3.74549e-08	8.25894e-07	0.405183	0.0165179	1.86362e-07	9.3458e-06	4.46626e-07
H24	0.000774446	6.22009e-05	1.00645e-05	0.000277687	0.000289138	0.00599484	0.00157103	0.0301123	0.000223955	0.479152	1.46212e-06	5.9788e-06	2.4693e-05	0.000348832	3.43287e-05	0.000493297	0.00344436	0.00310541	0.0067109	8.55529e-05	2.06562e-07	8.57735e-07	0.0165179	0.408558	5.87551e-07	1.81367e-05	3.6918e-06
H25	4.63419e-05	0.00109937	0.00724827	0.000445422	7.15006e-06	7.47825e-05	5.73258e-05	9.76425e-06	0.000156859	1.96586e-06	0.0199436	0.47359	0.0290314	1.03293e-06	9.58187e-07	2.80255e-05	0.000114779	6.84498e-06	2.56077e-06	4.5783e-05	0.00113193	0.00471435	1.86362e-07	5.87551e-07	0.414302	0.00609721	0.00359882
H26	0.00113833	0.000377864	0.00109507	0.0156998	0.000100812	0.00465578	0.000807997	0.000458391	0.00075924	0.000132009	0.00586634	0.0283395	0.465846	1.57789e-05	1.32724e-05	0.00109916	0.0056261	9.21362e-05	0.000112539	1.83381e-05	0.00044044	0.00338009	9.3458e-06	1.81367e-05	0.00609721	0.375359	0.0160268
H27	7.21727e-05	0.000336926	0.00162466	0.00060498	5.00103e-06	0.000127805	3.97981e-05	1.08614e-05	5.0185e-05	5.48225e-06	0.0063296	0.0308124	0.485609	8.03418e-07	7.67052e-07	3.20238e-05	0.000327145	9.97786e-06	5.09187e-06	4.51611e-06	0.000791089	0.000388286	4.46626e-07	3.6918e-06	0.00359882	0.0160268	0.419471
LDM — ajoene_e_4_LIDI_matrix
	S1	S2	S3	O4	C5	C6	C7	C8	C9	C10	C11	C12	C13	H14	H15	H16	H17	H18	H19	H20	H21	H22	H23	H24	H25	H26	H27
S1	12.9467	0.00177258	0.00312931	0.682281	0.457296	0.467244	0.0286613	0.0289524	0.019202	0.0159633	0.000593996	5.27721e-05	0.000503658	0.0217445	0.0191429	0.022731	0.0219827	0.0012111	0.0040934	0.000844231	7.69826e-05	0.0013562	0.000860924	0.00108154	4.8262e-05	0.00110604	5.52181e-05		92.2645	31.7356	63.4711
S2	0.00177258	14.5647	0.639832	0.000505351	0.00917136	0.000449156	0.0521111	4.99314e-05	0.569538	0.000120608	0.0370028	0.018217	0.00905297	0.00150791	0.000919499	0.000971636	7.04672e-05	0.01204	2.60834e-05	0.0289025	0.00908528	0.00213789	0.000419556	8.99537e-06	0.00128014	0.000308371	0.000314365
S3	0.00312931	0.639832	14.6476	0.00161942	0.00183484	0.00204418	0.0238492	0.000340848	0.0471688	0.00165424	0.52962	0.0375762	0.0190935	0.000347096	0.000170746	0.00708206	0.000101811	0.00135378	0.000206284	0.00356058	0.0282461	0.026004	0.00507113	0.000160625	0.00788682	0.00103355	0.00159426
O4	0.682281	0.000505351	0.00161942	8.32597	0.0615899	0.0610235	0.0177673	0.0128231	0.00382481	0.00674668	0.00807834	0.000919223	0.00695406	0.00283501	0.0078768	0.00378008	0.00849242	0.00698624	0.000745375	0.000313786	0.000384447	0.0188101	0.000448869	0.000255509	0.000467143	0.0154222	0.000582021
C5	0.457296	0.00917136	0.00183484	0.0615899	4.06731	0.0246065	0.518797	0.00482661	0.0356087	0.00190927	0.000170418	8.05164e-05	0.000220859	0.467228	0.465639	0.00355612	0.00344311	0.0171051	0.000287228	0.00523875	2.48885e-05	0.000205487	0.000102649	0.000199761	1.0089e-05	0.000191529	6.34966e-06
C6	0.467244	0.000449156	0.00204418	0.0610235	0.0246065	4.07099	0.00625498	0.51792	0.00604124	0.037944	0.0008509	7.14821e-05	4.46902e-05	0.00456863	0.00528702	0.448887	0.46526	0.000216835	0.0201162	0.00157671	6.82834e-05	0.00226758	0.00606787	0.00629624	3.84471e-05	0.000120122	3.33434e-06
C7	0.0286613	0.0521111	0.0238492	0.0177673	0.518797	0.00625498	3.94488	0.000700685	0.874743	0.0001266	0.00335413	0.00108811	0.00242845	0.0189088	0.0179046	0.00746386	0.000419329	0.455885	0.000217895	0.0267955	0.000513583	0.00467457	3.93216e-05	1.16235e-05	0.00010478	0.00175218	5.32112e-05
C8	0.0289524	4.99314e-05	0.000340848	0.0128231	0.00482661	0.51792	0.000700685	3.97207	0.00059375	0.918826	0.00051394	5.33513e-05	1.08884e-05	0.000941071	0.000601594	0.0167432	0.0188198	2.64629e-05	0.474036	0.000210842	0.000299037	0.00108623	0.0295483	0.0300127	1.81601e-05	1.09384e-05	1.88672e-06
C9	0.019202	0.569538	0.0471688	0.00382481	0.0356087	0.00604124	0.874743	0.00059375	4.08349	0.000270136	0.00449422	0.000737139	0.000455147	0.00730227	0.00571047	0.0124396	0.000349687	0.0261471	0.000248203	0.467562	0.000644248	0.00347837	0.000104501	1.69101e-05	0.000142679	0.000254353	2.25226e-05
C10	0.0159633	0.000120608	0.00165424	0.00674668	0.00190927	0.037944	0.0001266	0.918826	0.000270136	4.06779	0.00258955	0.000237605	5.5506e-05	0.000542245	0.000258422	0.00604004	0.00982553	1.09015e-05	0.0294081	3.46852e-05	0.00162786	0.00288954	0.474493	0.482836	5.69823e-05	1.38807e-05	6.46316e-06
C11	0.000593996	0.0370028	0.52962	0.00807834	0.000170418	0.0008509	0.00335413	0.00051394	0.00449422	0.00258955	4.02895	0.51569	0.0372973	2.75222e-05	2.58864e-05	0.0020383	6.52711e-05	0.000824715	9.40229e-05	0.00030609	0.46092	0.444396	0.00486533	0.000134016	0.0200175	0.00542524	0.00631946
C12	5.27721e-05	0.018217	0.0375762	0.000919223	8.05164e-05	7.14821e-05	0.00108811	5.33513e-05	0.000737139	0.000237605	0.51569	3.96944	0.917444	5.90844e-06	4.51003e-05	0.000210877	7.38852e-06	0.00268147	8.86906e-06	0.00023264	0.0191709	0.0166666	0.000566604	1.27467e-05	0.473152	0.0283453	0.0307746
C13	0.000503658	0.00905297	0.0190935	0.00695406	0.000220859	4.46902e-05	0.00242845	1.08884e-05	0.000455147	5.5506e-05	0.0372973	0.917444	4.09039	1.24757e-05	8.50658e-05	3.82956e-05	1.51024e-05	0.00647655	2.61682e-06	0.000173728	0.0103657	0.00564565	0.000171581	3.08509e-06	0.0290102	0.467594	0.485017
H14	0.0217445	0.00150791	0.000347096	0.00283501	0.467228	0.00456863	0.0189088	0.000941071	0.00730227	0.000542245	2.75222e-05	5.90844e-06	1.24757e-05	0.392321	0.0148575	0.000232436	0.000249407	0.00168927	1.45685e-05	0.000406895	7.9768e-06	2.58428e-05	2.67773e-05	6.3389e-05	1.06457e-06	1.03128e-05	3.80541e-07
H15	0.0191429	0.000919499	0.000170746	0.0078768	0.465639	0.00528702	0.0179046	0.000601594	0.00571047	0.000258422	2.58864e-05	4.51003e-05	8.50658e-05	0.0148575	0.397079	0.000436251	0.00370412	0.00442297	2.27925e-05	0.00330229	3.81894e-06	2.82811e-05	1.27653e-05	3.30536e-05	2.25002e-06	5.22555e-05	1.85128e-06
H16	0.022731	0.000971636	0.00708206	0.00378008	0.00355612	0.448887	0.00746386	0.0167432	0.0124396	0.00604004	0.0020383	0.000210877	3.82956e-05	0.000232436	0.000436251	0.364819	0.0139927	0.000161955	0.00460014	0.00293531	0.000105853	0.00319663	0.00364477	0.000415979	8.09861e-05	1.67191e-05	3.15627e-06
H17	0.0219827	7.04672e-05	0.000101811	0.00849242	0.00344311	0.46526	0.000419329	0.0188198	0.000349687	0.00982553	6.52711e-05	7.38852e-06	1.51024e-05	0.000249407	0.00370412	0.0139927	0.403671	9.6955e-05	0.00137251	0.000271521	1.24492e-05	0.000178773	0.000480538	0.000773917	4.7945e-06	2.97958e-05	1.19118e-06
H18	0.0012111	0.01204	0.00135378	0.00698624	0.0171051	0.000216835	0.455885	2.64629e-05	0.0261471	1.09015e-05	0.000824715	0.00268147	0.00647655	0.00168927	0.00442297	0.000161955	9.6955e-05	0.362748	5.67469e-06	0.00580881	0.00013306	0.000871196	5.9305e-06	1.07339e-06	0.000110527	0.00363736	0.000206448
H19	0.0040934	2.60834e-05	0.000206284	0.000745375	0.000287228	0.0201162	0.000217895	0.474036	0.000248203	0.0294081	9.40229e-05	8.86906e-06	2.61682e-06	1.45685e-05	2.27925e-05	0.00460014	0.00137251	5.67469e-06	0.412521	5.09959e-05	6.92693e-05	8.34573e-05	0.00644056	0.00363259	3.06366e-06	1.34134e-06	4.03207e-07
H20	0.000844231	0.0289025	0.00356058	0.000313786	0.00523875	0.00157671	0.0267955	0.000210842	0.467562	3.46852e-05	0.00030609	0.00023264	0.000173728	0.000406895	0.00330229	0.00293531	0.000271521	0.00580881	5.09959e-05	0.392256	3.72105e-05	9.65931e-05	1.7735e-05	3.43527e-06	2.32346e-05	6.48517e-05	6.69901e-06
H21	7.69826e-05	0.00908528	0.0282461	0.000384447	2.48885e-05	6.82834e-05	0.000513583	0.000299037	0.000644248	0.00162786	0.46092	0.0191709	0.0103657	7.9768e-06	3.81894e-06	0.000105853	1.24492e-05	0.00013306	6.92693e-05	3.72105e-05	0.397766	0.0136307	0.00291432	7.20917e-05	0.00100904	0.000423512	0.000748911
H22	0.0013562	0.00213789	0.026004	0.0188101	0.000205487	0.00226758	0.00467457	0.00108623	0.00347837	0.00288954	0.444396	0.0166666	0.00564565	2.58428e-05	2.82811e-05	0.00319663	0.000178773	0.000871196	8.34573e-05	9.65931e-05	0.0136307	0.351793	0.00259392	0.000147227	0.00448898	0.00294697	0.000367689
H23	0.000860924	0.000419556	0.00507113	0.000448869	0.000102649	0.00606787	3.93216e-05	0.0295483	0.000104501	0.474493	0.00486533	0.000566604	0.000171581	2.67773e-05	1.27653e-05	0.00364477	0.000480538	5.9305e-06	0.00644056	1.7735e-05	0.00291432	0.00259392	0.399005	0.0161586	8.55745e-05	1.30554e-05	1.9641e-05
H24	0.00108154	8.99537e-06	0.000160625	0.000255509	0.000199761	0.00629624	1.16235e-05	0.0300127	1.69101e-05	0.482836	0.000134016	1.27467e-05	3.08509e-06	6.3389e-05	3.30536e-05	0.000415979	0.000773917	1.07339e-06	0.00363259	3.43527e-06	7.20917e-05	0.000147227	0.0161586	0.407296	2.89651e-06	8.47452e-07	3.16452e-07
H25	4.8262e-05	0.00128014	0.00788682	0.000467143	1.0089e-05	3.84471e-05	0.00010478	1.81601e-05	0.000142679	5.69823e-05	0.0200175	0.473152	0.0290102	1.06457e-06	2.25002e-06	8.09861e-05	4.7945e-06	0.000110527	3.06366e-06	2.32346e-05	0.00100904	0.00448898	8.55745e-05	2.89651e-06	0.413871	0.00617496	0.00367097
H26	0.00110604	0.000308371	0.00103355	0.0154222	0.000191529	0.000120122	0.00175218	1.09384e-05	0.000254353	1.38807e-05	0.00542524	0.0283453	0.467594	1.03128e-05	5.22555e-05	1.67191e-05	2.97958e-05	0.00363736	1.34134e-06	6.48517e-05	0.000423512	0.00294697	1.30554e-05	8.47452e-07	0.00617496	0.372368	0.0156499
H27	5.52181e-05	0.000314365	0.00159426	0.000582021	6.34966e-06	3.33434e-06	5.32112e-05	1.88672e-06	2.25226e-05	6.46316e-06	0.00631946	0.0307746	0.485017	3.80541e-07	1.85128e-06	3.15627e-06	1.19118e-06	0.000206448	4.03207e-07	6.69901e-06	0.000748911	0.000367689	1.9641e-05	3.16452e-07	0.00367097	0.0156499	0.416765
LDM — ajoene_e_5_LIDI_matrix
	S1	S2	S3	O4	C5	C6	C7	C8	C9	C10	C11	C12	C13	H14	H15	H16	H17	H18	H19	H20	H21	H22	H23	H24	H25	H26	H27
S1	12.9482	0.00393184	0.000968256	0.680689	0.458725	0.467661	0.0296795	0.0270265	0.0199768	0.0142232	0.00023604	0.000815049	0.000566868	0.0230626	0.0206692	0.0227297	0.0223947	0.00170963	0.00431624	0.00105571	7.19362e-05	3.95929e-05	0.000781846	0.000949341	0.0013788	4.49219e-05	0.000705769		92.2571	31.7417	63.4834
S2	0.00393184	14.5315	0.653511	0.00196066	0.00931143	0.000413499	0.064458	6.73118e-05	0.579862	0.000100039	0.0377444	0.0142496	0.00724181	0.00120943	0.00131453	4.97399e-05	0.000549935	0.0107936	2.09026e-05	0.0261302	0.00875567	0.00346201	0.000138978	6.86797e-06	0.000764027	0.00052378	0.000264708
S3	0.000968256	0.653511	14.6361	0.000847861	0.00166791	0.000184255	0.0117681	2.08263e-05	0.0426682	1.4921e-05	0.529457	0.0354176	0.0178466	0.000165799	0.000135821	1.71156e-05	0.00028402	0.0012675	7.72945e-06	0.0127505	0.0278874	0.0299087	2.16735e-05	1.34615e-06	0.00570116	0.00122795	0.00152827
O4	0.680689	0.00196066	0.000847861	8.3386	0.0607279	0.0616916	0.0125202	0.00936856	0.0186152	0.00522457	0.000767799	0.00928361	0.00141551	0.00417476	0.00828242	0.00504855	0.00486246	0.000530312	0.000734838	0.00866611	4.4272e-05	0.000290552	0.000298601	0.000590143	0.0193286	0.000227617	0.000720506
C5	0.458725	0.00931143	0.00166791	0.0607279	4.06011	0.0226657	0.52028	0.00762501	0.0358259	0.0042972	0.000135788	0.000117588	0.000104584	0.464351	0.464303	0.00484299	0.00263733	0.0184442	0.000338531	0.00507475	3.8445e-05	1.06286e-05	0.00029478	0.000109013	0.000112475	6.55959e-06	6.74665e-05
C6	0.467661	0.000413499	0.000184255	0.0616916	0.0226657	4.07399	0.00946945	0.52011	0.00258207	0.0370276	0.000110597	0.00136487	0.00413252	0.00482643	0.00153301	0.462132	0.448088	0.00152339	0.0197482	0.000176732	2.11884e-05	1.4862e-05	0.00600043	0.00629048	0.000348215	0.000197191	0.0057029
C7	0.0296795	0.064458	0.0117681	0.0125202	0.52028	0.00946945	3.95723	0.00157862	0.867907	0.00225615	0.00171867	0.00197369	0.00141065	0.0186519	0.0177692	0.000775077	0.0104391	0.467908	0.000179569	0.0228727	0.000483491	0.000139415	0.00221942	8.34653e-05	0.0007444	7.21371e-05	7.84658e-05
C8	0.0270265	6.73118e-05	2.08263e-05	0.00936856	0.00762501	0.52011	0.00157862	3.98156	0.000318567	0.916568	8.06826e-06	0.000113471	0.000293865	0.000848927	0.00837723	0.0189888	0.016332	0.00146528	0.473851	5.3478e-05	1.77981e-06	1.361e-06	0.0299434	0.029989	2.91989e-05	1.46292e-05	0.000428727
C9	0.0199768	0.579862	0.0426682	0.0186152	0.0358259	0.00258207	0.867907	0.000318567	4.08159	0.000333128	0.00213783	0.00669367	0.00243779	0.00703527	0.00473659	0.00021015	0.00379963	0.0290994	9.30712e-05	0.456168	0.000333289	0.000356352	0.000326029	2.15995e-05	0.00285948	0.000112864	9.25731e-05
C10	0.0142232	0.000100039	1.4921e-05	0.00522457	0.0042972	0.0370276	0.00225615	0.916568	0.000333128	4.07877	4.13206e-06	2.54556e-05	9.57878e-05	0.000280304	0.00605347	0.00995748	0.00553819	0.00444435	0.0297493	8.89705e-05	8.06484e-07	1.08141e-06	0.47839	0.483068	1.63876e-05	5.30692e-06	0.000147446
C11	0.00023604	0.0377444	0.529457	0.000767799	0.000135788	0.000110597	0.00171867	8.06826e-06	0.00213783	4.13206e-06	4.01462	0.515847	0.038534	4.16106e-05	1.36226e-05	4.87203e-05	0.000214676	9.79103e-05	3.63389e-06	0.00031023	0.461563	0.465066	4.39028e-06	2.60077e-07	0.0175164	0.00675844	0.00633092
C12	0.000815049	0.0142496	0.0354176	0.00928361	0.000117588	0.00136487	0.00197369	0.000113471	0.00669367	2.54556e-05	0.515847	3.97964	0.91476	2.41519e-05	1.69824e-05	0.000121599	0.00379112	0.000105362	6.20671e-05	0.000430753	0.0193713	0.0186218	4.05118e-05	1.43724e-06	0.455037	0.0303872	0.0300448
C13	0.000566868	0.00724181	0.0178466	0.00141551	0.000104584	0.00413252	0.00141065	0.000293865	0.00243779	9.57878e-05	0.038534	0.91476	4.08675	2.77204e-05	1.31322e-05	0.00109595	0.00888569	0.000111715	0.00012916	7.87414e-05	0.0109484	0.00720899	0.000100408	7.91837e-06	0.02606	0.481673	0.479278
H14	0.0230626	0.00120943	0.000165799	0.00417476	0.464351	0.00482643	0.0186519	0.000848927	0.00703527	0.000280304	4.16106e-05	2.41519e-05	2.77204e-05	0.389553	0.0146496	0.000969489	0.000197673	0.00326232	2.10117e-05	0.0019771	8.88612e-06	4.50001e-06	4.33893e-05	5.54012e-06	1.32371e-05	2.18987e-06	1.92954e-05
H15	0.0206692	0.00131453	0.000135821	0.00828242	0.464303	0.00153301	0.0177692	0.00837723	0.00473659	0.00605347	1.36226e-05	1.69824e-05	1.31322e-05	0.0146496	0.388573	0.000185959	0.000101202	0.00260483	0.000357157	0.000332645	1.90492e-06	1.67173e-06	0.000197103	0.000148546	2.36086e-05	9.52318e-07	5.15854e-06
H16	0.0227297	4.97399e-05	1.71156e-05	0.00504855	0.00484299	0.462132	0.000775077	0.0189888	0.00021015	0.00995748	4.87203e-05	0.000121599	0.00109595	0.000969489	0.000185959	0.390292	0.0137587	0.000149915	0.00130139	1.12232e-05	4.44123e-06	3.95713e-06	0.000491522	0.000780729	3.78938e-05	0.000118094	0.00231992
H17	0.0223947	0.000549935	0.00028402	0.00486246	0.00263733	0.448088	0.0104391	0.016332	0.00379963	0.00553819	0.000214676	0.00379112	0.00888569	0.000197673	0.000101202	0.0137587	0.360343	0.00230352	0.00469288	9.17943e-05	7.40077e-05	1.85479e-05	0.00334791	0.000391351	0.000433562	0.00032103	0.00616465
H18	0.00170963	0.0107936	0.0012675	0.000530312	0.0184442	0.00152339	0.467908	0.00146528	0.0290994	0.00444435	9.79103e-05	0.000105362	0.000111715	0.00326232	0.00260483	0.000149915	0.00230352	0.402123	0.000129909	0.00581324	2.00289e-05	1.49526e-05	0.00424707	0.000244761	3.14195e-05	4.19454e-06	1.10945e-05
H19	0.00431624	2.09026e-05	7.72945e-06	0.000734838	0.000338531	0.0197482	0.000179569	0.473851	9.30712e-05	0.0297493	3.63389e-06	6.20671e-05	0.00012916	2.10117e-05	0.000357157	0.00130139	0.00469288	0.000129909	0.410023	7.24762e-06	1.31212e-06	5.71177e-07	0.00669261	0.00367983	1.08062e-05	4.61654e-06	8.88672e-05
H20	0.00105571	0.0261302	0.0127505	0.00866611	0.00507475	0.000176732	0.0228727	5.3478e-05	0.456168	8.89705e-05	0.00031023	0.000430753	7.87414e-05	0.0019771	0.000332645	1.12232e-05	9.17943e-05	0.00581324	7.24762e-06	0.355923	2.38414e-05	0.000171525	9.64524e-05	3.64514e-06	0.000605108	2.1415e-05	8.02753e-06
H21	7.19362e-05	0.00875567	0.0278874	4.4272e-05	3.8445e-05	2.11884e-05	0.000483491	1.77981e-06	0.000333289	8.06484e-07	0.461563	0.0193713	0.0109484	8.88612e-06	1.90492e-06	4.44123e-06	7.40077e-05	2.00289e-05	1.31212e-06	2.38414e-05	0.393967	0.014831	1.09665e-06	6.66614e-08	0.000823736	0.000507846	0.000777297
H22	3.95929e-05	0.00346201	0.0299087	0.000290552	1.06286e-05	1.4862e-05	0.000139415	1.361e-06	0.000356352	1.08141e-06	0.465066	0.0186218	0.00720899	4.50001e-06	1.67173e-06	3.95713e-06	1.85479e-05	1.49526e-05	5.71177e-07	0.000171525	0.014831	0.40076	5.98625e-07	6.05861e-08	0.00462191	0.00492796	0.000518191
H23	0.000781846	0.000138978	2.16735e-05	0.000298601	0.00029478	0.00600043	0.00221942	0.0299434	0.000326029	0.47839	4.39028e-06	4.05118e-05	0.000100408	4.33893e-05	0.000197103	0.000491522	0.00334791	0.00424707	0.00669261	9.64524e-05	1.09665e-06	5.98625e-07	0.40705	0.0165157	3.45125e-06	4.02577e-06	3.64228e-05
H24	0.000949341	6.86797e-06	1.34615e-06	0.000590143	0.000109013	0.00629048	8.34653e-05	0.029989	2.15995e-05	0.483068	2.60077e-07	1.43724e-06	7.91837e-06	5.54012e-06	0.000148546	0.000780729	0.000391351	0.000244761	0.00367983	3.64514e-06	6.66614e-08	6.05861e-08	0.0165157	0.406776	1.02384e-06	5.11851e-07	1.05413e-05
H25	0.0013788	0.000764027	0.00570116	0.0193286	0.000112475	0.000348215	0.0007444	2.91989e-05	0.00285948	1.63876e-05	0.0175164	0.455037	0.02606	1.32371e-05	2.36086e-05	3.78938e-05	0.000433562	3.14195e-05	1.08062e-05	0.000605108	0.000823736	0.00462191	3.45125e-06	1.02384e-06	0.354508	0.00619863	0.0033072
H26	4.49219e-05	0.00052378	0.00122795	0.000227617	6.55959e-06	0.000197191	7.21371e-05	1.46292e-05	0.000112864	5.30692e-06	0.00675844	0.0303872	0.481673	2.18987e-06	9.52318e-07	0.000118094	0.00032103	4.19454e-06	4.61654e-06	2.1415e-05	0.000507846	0.00492796	4.02577e-06	5.11851e-07	0.00619863	0.417976	0.0168859
H27	0.000705769	0.000264708	0.00152827	0.000720506	6.74665e-05	0.0057029	7.84658e-05	0.000428727	9.25731e-05	0.000147446	0.00633092	0.0300448	0.479278	1.92954e-05	5.15854e-06	0.00231992	0.00616465	1.10945e-05	8.88672e-05	8.02753e-06	0.000777297	0.000518191	3.64228e-05	1.05413e-05	0.0033072	0.0168859	0.410505
LDM — ajoene_e_6_LIDI_matrix
	S1	S2	S3	O4	C5	C6	C7	C8	C9	C10	C11	C12	C13	H14	H15	H16	H17	H18	H19	H20	H21	H22	H23	H24	H25	H26	H27
S1	12.9425	0.00183286	0.00352336	0.679429	0.458325	0.469509	0.0285442	0.0310214	0.0191405	0.0168327	0.000518346	5.62218e-05	0.000519862	0.0194157	0.0218239	0.023724	0.0209346	0.00126866	0.00194987	0.000936626	0.00124212	6.68244e-05	0.000738949	0.000997445	4.75719e-05	5.61535e-05	0.00114859		92.2888	31.7193	63.4386
S2	0.00183286	14.5631	0.640113	0.000516024	0.00917862	0.000437879	0.0525073	7.74451e-05	0.569921	6.93914e-05	0.0371494	0.0174665	0.00947577	0.000938987	0.0015337	0.000964914	5.63622e-05	0.0121975	4.09943e-05	0.0289627	0.00240988	0.0091102	3.41487e-06	4.07601e-06	0.00100683	0.000309862	0.000341395
S3	0.00352336	0.640113	14.6461	0.00149698	0.00193362	0.0019834	0.023709	0.000417096	0.0477338	0.000134117	0.530047	0.0379589	0.0195944	0.000158205	0.000357166	0.00647235	8.43386e-05	0.00137068	0.000236659	0.00406391	0.0265872	0.0283111	7.34342e-06	1.08601e-05	0.00775824	0.00159043	0.0010602
O4	0.679429	0.000516024	0.00149698	8.33323	0.0612445	0.0605701	0.0176409	0.0120448	0.00374192	0.00311523	0.00642252	0.000859277	0.00697353	0.00786935	0.00281209	0.00395396	0.00840518	0.00733494	0.00814155	0.000321009	0.0152518	0.000318891	0.000414194	0.000188059	0.000446385	0.000574838	0.0155337
C5	0.458325	0.00917862	0.00193362	0.0612445	4.06911	0.0244164	0.518917	0.00475008	0.0357073	0.00187014	0.000174469	6.27592e-05	0.000187264	0.465732	0.466904	0.00391152	0.00285213	0.0171565	0.000217383	0.00528696	0.000223595	2.29965e-05	0.000104317	0.000241286	1.04164e-05	5.90229e-06	0.000196689
C6	0.469509	0.000437879	0.0019834	0.0605701	0.0244164	4.07497	0.00629568	0.516578	0.00574374	0.0384861	0.00121239	0.000108228	3.98775e-05	0.00502657	0.00462214	0.448963	0.465932	0.000216346	0.0188357	0.0013505	0.00317742	6.55189e-05	0.00635718	0.00640749	5.56486e-05	2.58401e-06	0.0001012
C7	0.0285442	0.0525073	0.023709	0.0176409	0.518917	0.00629568	3.94554	0.000720597	0.874304	0.000338012	0.0033265	0.000858819	0.00200427	0.0178579	0.018941	0.00776573	0.000391022	0.456638	3.33422e-05	0.0266502	0.00516994	0.000488239	2.21174e-05	4.95684e-05	0.000106533	5.02736e-05	0.00179522
C8	0.0310214	7.74451e-05	0.000417096	0.0120448	0.00475008	0.516578	0.000720597	3.98045	0.000588165	0.923179	0.000585513	6.06115e-05	1.25931e-05	0.000580146	0.000934832	0.0176786	0.0178259	2.45701e-05	0.4673	0.000185062	0.00132951	0.000229865	0.0306784	0.0301158	1.98262e-05	1.24727e-06	9.90096e-06
C9	0.0191405	0.569921	0.0477338	0.00374192	0.0357073	0.00574374	0.874304	0.000588165	4.08339	0.000718467	0.00480395	0.000743591	0.000452632	0.00572396	0.00748917	0.0119417	0.000299987	0.0262213	2.17044e-05	0.46747	0.00410726	0.000643301	2.9197e-05	4.62592e-05	0.000147288	2.37198e-05	0.000275107
C10	0.0168327	6.93914e-05	0.000134117	0.00311523	0.00187014	0.0384861	0.000338012	0.923179	0.000718467	4.07859	8.874e-05	4.71475e-06	4.39448e-06	9.51645e-05	0.000506805	0.00908003	0.00636245	9.44192e-06	0.0279383	7.7274e-05	0.000197236	5.53994e-05	0.481696	0.48296	1.78996e-06	2.42474e-07	2.64306e-06
C11	0.000518346	0.0371494	0.530047	0.00642252	0.000174469	0.00121239	0.0033265	0.000585513	0.00480395	8.874e-05	4.02361	0.515799	0.0373329	2.22636e-05	3.19441e-05	0.00282178	0.000100711	0.000659366	0.00130033	0.000309565	0.447917	0.462606	2.38267e-05	8.25426e-06	0.0200536	0.00633127	0.00550269
C12	5.62218e-05	0.0174665	0.0379589	0.000859277	6.27592e-05	0.000108228	0.000858819	6.06115e-05	0.000743591	4.71475e-06	0.515799	3.97074	0.917855	3.53219e-05	5.15687e-06	0.00029218	1.18033e-05	0.00205129	0.000156206	0.000228943	0.0171388	0.0191569	1.85015e-06	6.57361e-07	0.473437	0.0307564	0.028319
C13	0.000519862	0.00947577	0.0195944	0.00697353	0.000187264	3.98775e-05	0.00200427	1.25931e-05	0.000452632	4.39448e-06	0.0373329	0.917855	4.09035	7.16081e-05	1.03938e-05	4.56417e-05	1.23873e-05	0.00537391	2.5147e-05	0.000166603	0.00588712	0.010274	5.70997e-07	3.25762e-07	0.0290363	0.485003	0.467386
H14	0.0194157	0.000938987	0.000158205	0.00786935	0.465732	0.00502657	0.0178579	0.000580146	0.00572396	9.51645e-05	2.22636e-05	3.53219e-05	7.16081e-05	0.397248	0.0148691	0.00048085	0.00307355	0.00448909	0.000124549	0.00337311	2.71723e-05	3.4499e-06	1.50344e-05	1.37048e-05	1.78861e-06	1.63681e-06	5.62455e-05
H15	0.0218239	0.0015337	0.000357166	0.00281209	0.466904	0.00462214	0.018941	0.000934832	0.00748917	0.000506805	3.19441e-05	5.15687e-06	1.03938e-05	0.0148691	0.391886	0.000267258	0.000203377	0.00163302	1.6324e-05	0.000406834	3.26106e-05	7.38273e-06	2.4899e-05	6.43477e-05	1.06906e-06	3.3889e-07	9.35394e-06
H16	0.023724	0.000964914	0.00647235	0.00395396	0.00391152	0.448963	0.00776573	0.0176786	0.0119417	0.00908003	0.00282178	0.00029218	4.56417e-05	0.00048085	0.000267258	0.363716	0.0139193	0.00016273	0.00114399	0.00257463	0.00465833	0.000122599	0.00044248	0.000694287	0.000114387	3.14432e-06	2.32391e-05
H17	0.0209346	5.63622e-05	8.43386e-05	0.00840518	0.00285213	0.465932	0.000391022	0.0178259	0.000299987	0.00636245	0.000100711	1.18033e-05	1.23873e-05	0.00307355	0.000203377	0.0139193	0.40388	8.7063e-05	0.0049867	0.00020334	0.000257938	1.24683e-05	0.00406003	0.000468463	7.4255e-06	8.75592e-07	2.48332e-05
H18	0.00126866	0.0121975	0.00137068	0.00733494	0.0171565	0.000216346	0.456638	2.45701e-05	0.0262213	9.44192e-06	0.000659366	0.00205129	0.00537391	0.00448909	0.00163302	0.00016273	8.7063e-05	0.364111	6.57607e-06	0.00583751	0.000824053	0.000105363	1.06214e-06	1.5009e-06	9.80941e-05	0.00018629	0.00354078
H19	0.00194987	4.09943e-05	0.000236659	0.00814155	0.000217383	0.0188357	3.33422e-05	0.4673	2.17044e-05	0.0279383	0.00130033	0.000156206	2.5147e-05	0.000124549	1.6324e-05	0.00114399	0.0049867	6.57607e-06	0.388519	9.77459e-06	0.00162167	0.000390819	0.0064986	0.00354711	4.22383e-05	2.76731e-06	1.28634e-05
H20	0.000936626	0.0289627	0.00406391	0.000321009	0.00528696	0.0013505	0.0266502	0.000185062	0.46747	7.7274e-05	0.000309565	0.000228943	0.000166603	0.00337311	0.000406834	0.00257463	0.00020334	0.00583751	9.77459e-06	0.391664	0.000109038	3.35204e-05	4.27423e-06	8.90108e-06	1.98063e-05	6.87428e-06	6.49959e-05
H21	0.00124212	0.00240988	0.0265872	0.0152518	0.000223595	0.00317742	0.00516994	0.00132951	0.00410726	0.000197236	0.447917	0.0171388	0.00588712	2.71723e-05	3.26106e-05	0.00465833	0.000257938	0.000824053	0.00162167	0.000109038	0.363775	0.0139551	5.4158e-05	1.39964e-05	0.0045905	0.000387892	0.00318032
H22	6.68244e-05	0.0091102	0.0283111	0.000318891	2.29965e-05	6.55189e-05	0.000488239	0.000229865	0.000643301	5.53994e-05	0.462606	0.0191569	0.010274	3.4499e-06	7.38273e-06	0.000122599	1.24683e-05	0.000105363	0.000390819	3.35204e-05	0.0139551	0.39812	1.2889e-05	4.2307e-06	0.00104154	0.000763742	0.00042923
H23	0.000738949	3.41487e-06	7.34342e-06	0.000414194	0.000104317	0.00635718	2.21174e-05	0.0306784	2.9197e-05	0.481696	2.38267e-05	1.85015e-06	5.70997e-07	1.50344e-05	2.4899e-05	0.00044248	0.00406003	1.06214e-06	0.0064986	4.27423e-06	5.4158e-05	1.2889e-05	0.415564	0.0168178	7.87276e-07	3.90572e-08	4.50536e-07
H24	0.000997445	4.07601e-06	1.08601e-05	0.000188059	0.000241286	0.00640749	4.95684e-05	0.0301158	4.62592e-05	0.48296	8.25426e-06	6.57361e-07	3.25762e-07	1.37048e-05	6.43477e-05	0.000694287	0.000468463	1.5009e-06	0.00354711	8.90108e-06	1.39964e-05	4.2307e-06	0.0168178	0.406494	3.20399e-07	1.65879e-08	1.78801e-07
H25	4.75719e-05	0.00100683	0.00775824	0.000446385	1.04164e-05	5.56486e-05	0.000106533	1.98262e-05	0.000147288	1.78996e-06	0.0200536	0.473437	0.0290363	1.78861e-06	1.06906e-06	0.000114387	7.4255e-06	9.80941e-05	4.22383e-05	1.98063e-05	0.0045905	0.00104154	7.87276e-07	3.20399e-07	0.413947	0.00366227	0.00615725
H26	5.61535e-05	0.000309862	0.00159043	0.000574838	5.90229e-06	2.58401e-06	5.02736e-05	1.24727e-06	2.37198e-05	2.42474e-07	0.00633127	0.0307564	0.485003	1.63681e-06	3.3889e-07	3.14432e-06	8.75592e-07	0.00018629	2.76731e-06	6.87428e-06	0.000387892	0.000763742	3.90572e-08	1.65879e-08	0.00366227	0.416312	0.0156118
H27	0.00114859	0.000341395	0.0010602	0.0155337	0.000196689	0.0001012	0.00179522	9.90096e-06	0.000275107	2.64306e-06	0.00550269	0.028319	0.467386	5.62455e-05	9.35394e-06	2.32391e-05	2.48332e-05	0.00354078	1.28634e-05	6.49959e-05	0.00318032	0.00042923	4.50536e-07	1.78801e-07	0.00615725	0.0156118	0.371941
LDM — ajoene_e_7_LIDI_matrix
	S1	S2	S3	O4	C5	C6	C7	C8	C9	C10	C11	C12	C13	H14	H15	H16	H17	H18	H19	H20	H21	H22	H23	H24	H25	H26	H27
S1	12.9374	0.00177588	0.00365182	0.678857	0.458723	0.466648	0.0292178	0.0307133	0.019682	0.0216195	0.000533636	0.000177596	0.000683288	0.0223212	0.0188635	0.0229282	0.0225141	0.00123151	0.00143188	0.000714442	0.00124409	4.39151e-05	0.00211775	0.000907121	5.38783e-05	0.00107376	4.5387e-05		92.2906	31.7091	63.4182
S2	0.00177588	14.5891	0.637429	0.000534573	0.0091444	0.000465292	0.0508534	0.000251868	0.569404	5.35962e-05	0.0384402	0.00960667	0.00464442	0.00148703	0.000836797	3.68637e-05	0.000987197	0.012366	0.00068962	0.0288799	0.00458433	0.00608693	1.75199e-05	6.48906e-06	0.00054989	0.000192884	0.000478646
S3	0.00365182	0.637429	14.6383	0.00150742	0.00186771	0.00504048	0.0247698	0.000496018	0.0488845	0.000144287	0.527246	0.0402359	0.0174199	0.000337689	0.000179546	0.000292334	0.0140977	0.00146018	0.000447652	0.00350555	0.025506	0.0305508	2.37711e-05	2.61943e-05	0.00598396	0.000829049	0.00117807
O4	0.678857	0.000534573	0.00150742	8.3388	0.0612677	0.0607219	0.0158693	0.0102372	0.0036566	0.00644471	0.00661704	0.00095296	0.0083226	0.00319205	0.00790532	0.00414559	0.0049206	0.0068294	0.000682427	0.00031136	0.0158436	0.000362949	0.000514592	0.000445955	0.000472929	0.018573	0.000660497
C5	0.458723	0.0091444	0.00186771	0.0612677	4.06982	0.0224006	0.519423	0.0073536	0.0355977	0.00250696	0.000186221	3.78487e-05	0.000141532	0.466775	0.461283	0.00497526	0.00224298	0.0174181	0.00212156	0.0051498	0.000364927	1.31539e-05	0.000173698	7.98401e-05	1.43455e-05	0.000263628	8.23266e-06
C6	0.466648	0.000465292	0.00504048	0.0607219	0.0224006	4.07947	0.00650174	0.518562	0.00584487	0.0371322	0.000993839	0.00106978	0.00314037	0.00488006	0.00214711	0.461191	0.447704	0.000166666	0.0192525	0.000840311	0.00146199	6.83925e-05	0.00594292	0.00633891	5.78338e-05	0.00259836	9.65722e-05
C7	0.0292178	0.0508534	0.0247698	0.0158693	0.519423	0.00650174	3.94328	0.000747868	0.873881	0.000349849	0.00386291	0.000526383	0.000283292	0.0187942	0.0175289	0.000796818	0.00606974	0.460573	0.000505332	0.0266308	0.00802074	0.000229568	6.07647e-05	2.80062e-05	0.000196208	3.94925e-05	1.6648e-05
C8	0.0307133	0.000251868	0.000496018	0.0102372	0.0073536	0.518562	0.000747868	3.97755	0.00144686	0.916807	0.000112172	9.08724e-05	0.000267078	0.000630566	0.00979064	0.0180311	0.0166267	0.000154548	0.470317	0.00294848	0.000136475	1.60886e-05	0.0298716	0.0299166	7.16387e-06	0.000283769	7.78397e-06
C9	0.019682	0.569404	0.0488845	0.0036566	0.0355977	0.00584487	0.873881	0.00144686	4.08033	0.000242105	0.00452349	0.000611384	0.000201548	0.00707516	0.00548748	0.000538522	0.00914927	0.0267783	0.00313764	0.46571	0.00418228	0.00053789	9.4482e-05	3.60012e-05	0.000183551	3.45939e-05	1.6757e-05
C10	0.0216195	5.35962e-05	0.000144287	0.00644471	0.00250696	0.0371322	0.000349849	0.916807	0.000242105	4.08023	5.69231e-05	5.59924e-05	0.000145946	0.00015527	0.00325977	0.00734291	0.0054247	9.10014e-05	0.0295805	0.000354328	6.80329e-05	4.48811e-06	0.480551	0.482961	4.54517e-06	0.000102136	6.07962e-06
C11	0.000533636	0.0384402	0.527246	0.00661704	0.000186221	0.000993839	0.00386291	0.000112172	0.00452349	5.69231e-05	4.02506	0.514782	0.0373545	2.04081e-05	3.5771e-05	7.65446e-05	0.00277689	0.0019252	3.38272e-05	0.000364437	0.445809	0.464893	3.36432e-06	6.92732e-06	0.020012	0.00543252	0.00638043
C12	0.000177596	0.00960667	0.0402359	0.00095296	3.78487e-05	0.00106978	0.000526383	9.08724e-05	0.000611384	5.59924e-05	0.514782	3.98496	0.920811	8.91137e-06	5.96529e-06	0.000820528	0.00182644	0.000213204	7.56942e-06	5.67132e-05	0.0166698	0.0192159	4.40005e-06	6.55758e-06	0.474737	0.0280659	0.0308704
C13	0.000683288	0.00464442	0.0174199	0.0083226	0.000141532	0.00314037	0.000283292	0.000267078	0.000201548	0.000145946	0.0373545	0.920811	4.09121	2.02731e-05	2.37495e-05	0.00263686	0.00260309	3.6382e-05	2.27278e-05	1.51007e-05	0.00578433	0.0100356	1.08684e-05	1.31147e-05	0.0298249	0.465273	0.484891
H14	0.0223212	0.00148703	0.000337689	0.00319205	0.466775	0.00488006	0.0187942	0.000630566	0.00707516	0.00015527	2.04081e-05	8.91137e-06	2.02731e-05	0.391357	0.0144201	0.000869568	0.000170626	0.00174723	0.000182936	0.000385301	2.89704e-05	1.69094e-06	1.06394e-05	5.74194e-06	1.30065e-06	1.23604e-05	1.00048e-06
H15	0.0188635	0.000836797	0.000179546	0.00790532	0.461283	0.00214711	0.0175289	0.00979064	0.00548748	0.00325977	3.5771e-05	5.96529e-06	2.37495e-05	0.0144201	0.385577	0.00026512	0.000105493	0.00433992	0.00392631	0.00297943	8.58248e-05	4.42757e-06	0.000141692	0.000102162	1.8098e-06	4.29316e-05	1.98389e-06
H16	0.0229282	3.68637e-05	0.000292334	0.00414559	0.00497526	0.461191	0.000796818	0.0180311	0.000538522	0.00734291	7.65446e-05	0.000820528	0.00263686	0.000869568	0.00026512	0.384989	0.0135245	2.07385e-05	0.00379133	0.000100863	6.06078e-05	2.92693e-05	0.00263675	0.000453405	5.93892e-05	0.00217447	7.69713e-05
H17	0.0225141	0.000987197	0.0140977	0.0049206	0.00224298	0.447704	0.00606974	0.0166267	0.00914927	0.0054247	0.00277689	0.00182644	0.00260309	0.000170626	0.000105493	0.0135245	0.353082	0.00012865	0.0023182	0.00105059	0.00266127	0.000283622	0.00039272	0.000745059	6.31854e-05	0.000932656	9.22106e-05
H18	0.00123151	0.012366	0.00146018	0.0068294	0.0174181	0.000166666	0.460573	0.000154548	0.0267783	9.10014e-05	0.0019252	0.000213204	3.6382e-05	0.00174723	0.00433992	2.07385e-05	0.00012865	0.373269	0.000157089	0.00593871	0.00357991	0.000131234	7.03006e-06	4.1288e-06	7.50068e-05	1.34672e-05	2.14462e-06
H19	0.00143188	0.00068962	0.000447652	0.000682427	0.00212156	0.0192525	0.000505332	0.470317	0.00313764	0.0295805	3.38272e-05	7.56942e-06	2.27278e-05	0.000182936	0.00392631	0.00379133	0.0023182	0.000157089	0.409924	0.00534542	1.4603e-05	1.38242e-05	0.00664891	0.00368529	8.2285e-07	3.89176e-05	4.67338e-07
H20	0.000714442	0.0288799	0.00350555	0.00031136	0.0051498	0.000840311	0.0266308	0.00294848	0.46571	0.000354328	0.000364437	5.67132e-05	1.51007e-05	0.000385301	0.00297943	0.000100863	0.00105059	0.00593871	0.00534542	0.391597	0.000141276	0.000137063	0.000145575	3.58618e-05	6.65032e-06	2.59703e-06	2.75416e-06
H21	0.00124409	0.00458433	0.025506	0.0158436	0.000364927	0.00146199	0.00802074	0.000136475	0.00418228	6.80329e-05	0.445809	0.0166698	0.00578433	2.89704e-05	8.58248e-05	6.06078e-05	0.00266127	0.00357991	1.4603e-05	0.000141276	0.357012	0.013762	4.31959e-06	9.73488e-06	0.00457669	0.00297929	0.000395678
H22	4.39151e-05	0.00608693	0.0305508	0.000362949	1.31539e-05	6.83925e-05	0.000229568	1.60886e-05	0.00053789	4.48811e-06	0.464893	0.0192159	0.0100356	1.69094e-06	4.42757e-06	2.92693e-05	0.000283622	0.000131234	1.38242e-05	0.000137063	0.013762	0.39617	4.40784e-07	4.22676e-07	0.00111639	0.000430705	0.000804071
H23	0.00211775	1.75199e-05	2.37711e-05	0.000514592	0.000173698	0.00594292	6.07647e-05	0.0298716	9.4482e-05	0.480551	3.36432e-06	4.40005e-06	1.08684e-05	1.06394e-05	0.000141692	0.00263675	0.00039272	7.03006e-06	0.00664891	0.000145575	4.31959e-06	4.40784e-07	0.407948	0.0165996	4.50735e-07	9.02876e-06	4.81111e-07
H24	0.000907121	6.48906e-06	2.61943e-05	0.000445955	7.98401e-05	0.00633891	2.80062e-05	0.0299166	3.60012e-05	0.482961	6.92732e-06	6.55758e-06	1.31147e-05	5.74194e-06	0.000102162	0.000453405	0.000745059	4.1288e-06	0.00368529	3.58618e-05	9.73488e-06	4.22676e-07	0.0165996	0.405777	4.11936e-07	9.8674e-06	5.20609e-07
H25	5.38783e-05	0.00054989	0.00598396	0.000472929	1.43455e-05	5.78338e-05	0.000196208	7.16387e-06	0.000183551	4.54517e-06	0.020012	0.474737	0.0298249	1.30065e-06	1.8098e-06	5.93892e-05	6.31854e-05	7.50068e-05	8.2285e-07	6.65032e-06	0.00457669	0.00111639	4.50735e-07	4.11936e-07	0.415634	0.00611145	0.00369169
H26	0.00107376	0.000192884	0.000829049	0.018573	0.000263628	0.00259836	3.94925e-05	0.000283769	3.45939e-05	0.000102136	0.00543252	0.0280659	0.465273	1.23604e-05	4.29316e-05	0.00217447	0.000932656	1.34672e-05	3.89176e-05	2.59703e-06	0.00297929	0.000430705	9.02876e-06	9.8674e-06	0.00611145	0.366614	0.0154631
H27	4.5387e-05	0.000478646	0.00117807	0.000660497	8.23266e-06	9.65722e-05	1.6648e-05	7.78397e-06	1.6757e-05	6.07962e-06	0.00638043	0.0308704	0.484891	1.00048e-06	1.98389e-06	7.69713e-05	9.22106e-05	2.14462e-06	4.67338e-07	2.75416e-06	0.000395678	0.000804071	4.81111e-07	5.20609e-07	0.00369169	0.0154631	0.416145
LDM — ajoene_e_8_LIDI_matrix
	S1	S2	S3	O4	C5	C6	C7	C8	C9	C10	C11	C12	C13	H14	H15	H16	H17	H18	H19	H20	H21	H22	H23	H24	H25	H26	H27
S1	12.935	0.00327775	0.000913719	0.686085	0.464221	0.465094	0.0277698	0.0285014	0.0142166	0.0154612	0.000173735	0.000341781	0.00079822	0.019046	0.0228825	0.0220427	0.0224197	0.00254311	0.00343135	0.000668902	7.84162e-05	1.42916e-05	0.000738566	0.000893801	3.40043e-05	5.00406e-05	0.000703787		92.2629	31.7355	63.471
S2	0.00327775	14.5203	0.656941	0.000804418	0.00948805	0.000489828	0.0661546	6.64826e-05	0.577696	0.000216123	0.0387583	0.00794507	0.00546524	0.000803431	0.00227452	0.000683677	4.07663e-05	0.0102818	2.33345e-05	0.0269814	0.00803807	0.00809343	0.000522581	1.06889e-05	0.000496443	0.00180306	0.000228879
S3	0.000913719	0.656941	14.6344	0.000190955	0.00178381	0.000239364	0.0110138	5.40175e-05	0.040656	0.000203311	0.527921	0.0404827	0.02114	9.43433e-05	0.000171795	0.000374443	1.45096e-05	0.00120765	2.01143e-05	0.0117122	0.0270935	0.0286686	0.000848415	1.4948e-05	0.00625382	0.00124722	0.00139511
O4	0.686085	0.000804418	0.000190955	8.36841	0.0617543	0.0630294	0.0143495	0.00961804	0.00280476	0.00571058	3.2159e-05	6.50474e-05	0.000169473	0.0082633	0.00375478	0.00456197	0.00612159	0.0132038	0.000641134	0.000505381	1.43411e-05	3.9228e-06	0.000281219	0.00058349	1.58769e-05	3.45724e-05	0.000161482
C5	0.464221	0.00948805	0.00178381	0.0617543	4.06373	0.0235882	0.516739	0.00645898	0.0366335	0.00508144	0.000139323	7.92961e-05	0.000152244	0.460759	0.463542	0.00360683	0.0045148	0.0173482	0.000280705	0.00555873	5.14881e-05	1.17201e-05	0.000475405	0.000118469	7.40101e-06	1.04359e-05	4.44864e-05
C6	0.465094	0.000489828	0.000239364	0.0630294	0.0235882	4.07741	0.00882671	0.520147	0.00364766	0.036409	0.000119354	0.00138552	0.004905	0.00201212	0.00499293	0.448226	0.463988	0.000267134	0.0197566	0.000152867	2.01873e-05	5.353e-06	0.00532615	0.00629212	9.66e-05	0.000215196	0.00372608
C7	0.0277698	0.0661546	0.0110138	0.0143495	0.516739	0.00882671	3.95643	0.000800221	0.877028	0.00105435	0.00184847	0.000989545	0.00187705	0.0175065	0.0192651	0.011838	0.000708754	0.459823	0.000177776	0.0250281	0.000590432	0.000181623	0.00159808	7.69516e-05	2.69055e-05	0.000122975	7.41049e-05
C8	0.0285014	6.64826e-05	5.40175e-05	0.00961804	0.00645898	0.520147	0.000800221	3.98141	0.00051922	0.913887	4.93324e-05	0.000455911	0.00139791	0.00822263	0.000711029	0.0167052	0.0189471	0.000111662	0.474476	0.000521562	3.63435e-06	1.11902e-05	0.0285475	0.030065	0.000529535	0.000117228	0.00296716
C9	0.0142166	0.577696	0.040656	0.00280476	0.0366335	0.00364766	0.877028	0.00051922	4.09691	0.00227224	0.00205789	0.00480441	0.00428631	0.00569517	0.00966179	0.00673054	0.000271491	0.0273146	0.000165843	0.462134	0.000491871	0.000299867	0.00506493	0.000178732	0.000264649	0.000219979	0.000111718
C10	0.0154612	0.000216123	0.000203311	0.00571058	0.00508144	0.036409	0.00105435	0.913887	0.00227224	4.08493	0.000171099	0.00307873	0.0036788	0.00874271	0.000383925	0.00517088	0.00897699	0.000136775	0.0297338	0.00241726	1.25519e-05	6.00328e-05	0.468825	0.483652	0.00281862	0.000219177	0.00406883
C11	0.000173735	0.0387583	0.527921	3.2159e-05	0.000139323	0.000119354	0.00184847	4.93324e-05	0.00205789	0.000171099	4.01335	0.517286	0.036179	5.58849e-06	7.26046e-05	0.000178288	1.36416e-05	8.63021e-05	9.79508e-06	0.00030314	0.463419	0.462614	0.000428219	7.69104e-06	0.0197084	0.00612926	0.00611119
C12	0.000341781	0.00794507	0.0404827	6.50474e-05	7.92961e-05	0.00138552	0.000989545	0.000455911	0.00480441	0.00307873	0.517286	3.96841	0.910913	8.248e-06	3.48456e-05	0.00331779	7.34334e-05	3.6581e-05	0.000156166	0.00062025	0.0195561	0.0182373	0.00769102	0.000197627	0.470598	0.0296481	0.02921
C13	0.00079822	0.00546524	0.02114	0.000169473	0.000152244	0.004905	0.00187705	0.00139791	0.00428631	0.0036788	0.036179	0.910913	4.07516	1.18628e-05	7.5777e-05	0.0106016	0.00029094	7.14812e-05	0.00016225	0.000209777	0.0092915	0.00610925	0.00535148	0.000196722	0.0289141	0.479233	0.476297
H14	0.019046	0.000803431	9.43433e-05	0.0082633	0.460759	0.00201212	0.0175065	0.00822263	0.00569517	0.00874271	5.58849e-06	8.248e-06	1.18628e-05	0.385414	0.0143874	0.000134748	0.000242592	0.00461634	0.000187904	0.00337022	1.10875e-06	1.79594e-06	0.000802103	0.000201604	4.62407e-06	1.72715e-06	1.96749e-05
H15	0.0228825	0.00227452	0.000171795	0.00375478	0.463542	0.00499293	0.0192651	0.000711029	0.00966179	0.000383925	7.26046e-05	3.48456e-05	7.5777e-05	0.0143874	0.390804	0.000269341	0.000991842	0.000864781	1.6741e-05	0.000381215	1.5963e-05	6.2102e-06	5.2754e-05	7.50523e-06	2.0173e-06	4.28822e-06	1.97856e-05
H16	0.0220427	0.000683677	0.000374443	0.00456197	0.00360683	0.448226	0.011838	0.0167052	0.00673054	0.00517088	0.000178288	0.00331779	0.0106016	0.000134748	0.000269341	0.361715	0.0138098	0.000625319	0.00454157	0.000195062	6.31604e-05	8.81838e-06	0.00265251	0.000342345	0.000118543	0.000729852	0.00416912
H17	0.0224197	4.07663e-05	1.45096e-05	0.00612159	0.0045148	0.463988	0.000708754	0.0189471	0.000271491	0.00897699	1.36416e-05	7.34334e-05	0.00029094	0.000242592	0.000991842	0.0138098	0.390284	1.92841e-05	0.00168403	1.74104e-05	1.89656e-06	5.54906e-07	0.000441435	0.000805618	1.17703e-05	1.5706e-05	0.000391259
H18	0.00254311	0.0102818	0.00120765	0.0132038	0.0173482	0.000267134	0.459823	0.000111662	0.0273146	0.000136775	8.63021e-05	3.6581e-05	7.14812e-05	0.00461634	0.000864781	0.000625319	1.92841e-05	0.370052	1.5961e-05	0.00582034	2.17301e-05	2.11325e-05	8.49948e-05	4.24363e-06	5.25991e-06	1.79493e-05	3.07393e-06
H19	0.00343135	2.33345e-05	2.01143e-05	0.000641134	0.000280705	0.0197566	0.000177776	0.474476	0.000165843	0.0297338	9.79508e-06	0.000156166	0.00016225	0.000187904	1.6741e-05	0.00454157	0.00168403	1.5961e-05	0.411168	7.92351e-05	1.27141e-06	2.75484e-06	0.00630599	0.00370959	0.000103269	1.08872e-05	7.15324e-05
H20	0.000668902	0.0269814	0.0117122	0.000505381	0.00555873	0.000152867	0.0250281	0.000521562	0.462134	0.00241726	0.00030314	0.00062025	0.000209777	0.00337022	0.000381215	0.000195062	1.74104e-05	0.00582034	7.92351e-05	0.378	2.22535e-05	0.000163891	0.00379991	0.000118213	0.000146746	1.6925e-05	1.13808e-05
H21	7.84162e-05	0.00803807	0.0270935	1.43411e-05	5.14881e-05	2.01873e-05	0.000590432	3.63435e-06	0.000491871	1.25519e-05	0.463419	0.0195561	0.0092915	1.10875e-06	1.5963e-05	6.31604e-05	1.89656e-06	2.17301e-05	1.27141e-06	2.22535e-05	0.395726	0.0143959	4.17232e-05	8.88777e-07	0.00146809	0.000473918	0.000793849
H22	1.42916e-05	0.00809343	0.0286686	3.9228e-06	1.17201e-05	5.353e-06	0.000181623	1.11902e-05	0.000299867	6.00328e-05	0.462614	0.0182373	0.00610925	1.79594e-06	6.2102e-06	8.81838e-06	5.54906e-07	2.11325e-05	2.75484e-06	0.000163891	0.0143959	0.389486	0.000130284	2.49149e-06	0.00506058	0.00396592	0.000424726
H23	0.000738566	0.000522581	0.000848415	0.000281219	0.000475405	0.00532615	0.00159808	0.0285475	0.00506493	0.468825	0.000428219	0.00769102	0.00535148	0.000802103	5.2754e-05	0.00265251	0.000441435	8.49948e-05	0.00630599	0.00379991	4.17232e-05	0.000130284	0.388972	0.0159646	0.00500593	0.000214427	0.00153273
H24	0.000893801	1.06889e-05	1.4948e-05	0.00058349	0.000118469	0.00629212	7.69516e-05	0.030065	0.000178732	0.483652	7.69104e-06	0.000197627	0.000196722	0.000201604	7.50523e-06	0.000342345	0.000805618	4.24363e-06	0.00370959	0.000118213	8.88777e-07	2.49149e-06	0.0159646	0.408842	0.000108681	8.36783e-06	0.000111635
H25	3.40043e-05	0.000496443	0.00625382	1.58769e-05	7.40101e-06	9.66e-05	2.69055e-05	0.000529535	0.000264649	0.00281862	0.0197084	0.470598	0.0289141	4.62407e-06	2.0173e-06	0.000118543	1.17703e-05	5.25991e-06	0.000103269	0.000146746	0.00146809	0.00506058	0.00500593	0.000108681	0.411789	0.0067462	0.00360348
H26	5.00406e-05	0.00180306	0.00124722	3.45724e-05	1.04359e-05	0.000215196	0.000122975	0.000117228	0.000219979	0.000219177	0.00612926	0.0296481	0.479233	1.72715e-06	4.28822e-06	0.000729852	1.5706e-05	1.79493e-05	1.08872e-05	1.6925e-05	0.000473918	0.00396592	0.000214427	8.36783e-06	0.0067462	0.405861	0.0162782
H27	0.000703787	0.000228879	0.00139511	0.000161482	4.44864e-05	0.00372608	7.41049e-05	0.00296716	0.000111718	0.00406883	0.00611119	0.02921	0.476297	1.96749e-05	1.97856e-05	0.00416912	0.000391259	3.07393e-06	7.15324e-05	1.13808e-05	0.000793849	0.000424726	0.00153273	0.000111635	0.00360348	0.0162782	0.39886
LDM — ajoene_e_9_LIDI_matrix
	S1	S2	S3	O4	C5	C6	C7	C8	C9	C10	C11	C12	C13	H14	H15	H16	H17	H18	H19	H20	H21	H22	H23	H24	H25	H26	H27
S1	12.9242	0.00231977	0.0020099	0.682912	0.461672	0.464824	0.0278927	0.0304652	0.0173155	0.0212735	0.000168554	0.000552731	0.000676814	0.0224618	0.0191368	0.0226164	0.0226042	0.00137702	0.00139314	0.000715522	7.65336e-05	1.82016e-05	0.00189352	0.000905499	0.000702094	4.18529e-05	0.00117135		92.2728	31.7283	63.4565
S2	0.00231977	14.5476	0.648354	0.000628514	0.0091598	0.000353077	0.0580022	0.000184502	0.573028	4.59009e-05	0.0379777	0.0105073	0.00923954	0.00178605	0.000855817	2.47564e-05	0.000496084	0.0117364	0.000639189	0.0287327	0.00822144	0.00648681	1.42057e-05	4.97233e-06	0.000495986	0.00380749	0.000341071
S3	0.0020099	0.648354	14.6537	0.00055186	0.00182847	0.000365434	0.0176337	0.000237771	0.0429965	3.72472e-05	0.526028	0.0401729	0.0235872	0.000239458	9.51703e-05	3.53095e-05	0.00118049	0.00133161	0.000590228	0.00522109	0.0271244	0.029543	1.446e-05	5.59681e-06	0.00537113	0.00135687	0.00133027
O4	0.682912	0.000628514	0.00055186	8.35492	0.061832	0.0616852	0.0130739	0.0103379	0.00306283	0.00655329	0.000270325	0.00157841	0.00983028	0.00353271	0.00822983	0.00466003	0.00494487	0.00732455	0.000675995	0.000348266	3.4019e-05	2.0531e-05	0.000501111	0.000464086	0.000253316	0.000477877	0.0174031
C5	0.461672	0.0091598	0.00182847	0.061832	4.06831	0.0232975	0.518108	0.00736216	0.0360516	0.00241557	0.0001123	0.000141045	0.000268366	0.464883	0.461722	0.00498001	0.00262837	0.017291	0.00235088	0.00531619	4.54643e-05	5.74666e-06	0.000167175	7.79623e-05	4.43576e-05	3.83696e-05	7.51498e-05
C6	0.464824	0.000353077	0.000365434	0.0616852	0.0232975	4.07924	0.00729688	0.519236	0.00452908	0.0372449	0.00023589	0.00353289	0.0023284	0.00497877	0.00198622	0.464096	0.447886	0.000156266	0.019287	0.000353877	1.13726e-05	9.09069e-05	0.00595359	0.00634783	0.0040484	9.44089e-05	0.00134525
C7	0.0278927	0.0580022	0.0176337	0.0130739	0.518108	0.00729688	3.94291	0.000901634	0.876251	0.00035797	0.00142252	0.00390972	0.00636175	0.0192575	0.0176602	0.00077781	0.00800784	0.459782	0.000710094	0.02655	0.000669385	7.56612e-05	6.28808e-05	2.92518e-05	0.00017489	0.000434168	0.000399523
C8	0.0304652	0.000184502	0.000237771	0.0103379	0.00736216	0.519236	0.000901634	3.97863	0.00142619	0.916995	1.80482e-05	0.000213415	0.000192491	0.000653671	0.00924693	0.0182685	0.0168617	0.000131716	0.470353	0.00227953	1.17078e-06	9.18755e-06	0.0298999	0.0299525	0.000248391	1.0877e-05	0.000160188
C9	0.0173155	0.573028	0.0429965	0.00306283	0.0360516	0.00452908	0.876251	0.00142619	4.08467	0.000227275	0.00213219	0.00512766	0.00447372	0.00818698	0.00558085	0.000399596	0.00757034	0.0266492	0.00327159	0.465996	0.00047744	0.000342436	9.09153e-05	3.34591e-05	0.000340129	0.000229028	0.000148949
C10	0.0212735	4.59009e-05	3.72472e-05	0.00655329	0.00241557	0.0372449	0.00035797	0.916995	0.000227275	4.08094	8.71119e-06	0.000123282	0.000115454	0.000145892	0.0030148	0.00733251	0.0055653	7.91622e-05	0.0295485	0.00027468	7.34576e-07	3.06185e-06	0.480663	0.48311	0.000125003	6.60232e-06	8.6057e-05
C11	0.000168554	0.0379777	0.526028	0.000270325	0.0001123	0.00023589	0.00142252	1.80482e-05	0.00213219	8.71119e-06	4.00885	0.517455	0.0363545	3.47926e-05	1.60446e-05	1.97195e-05	0.00056492	0.000190182	2.37304e-05	0.000333302	0.464894	0.46351	8.68273e-07	1.341e-06	0.0200718	0.00639949	0.00580309
C12	0.000552731	0.0105073	0.0401729	0.00157841	0.000141045	0.00353289	0.00390972	0.000213415	0.00512766	0.000123282	0.517455	3.97178	0.90957	2.92333e-05	2.47818e-05	0.000185842	0.00946297	0.00153759	3.33649e-05	0.000143265	0.0189227	0.0183229	6.76449e-06	1.86424e-05	0.470443	0.0301031	0.0274538
C13	0.000676814	0.00923954	0.0235872	0.00983028	0.000268366	0.0023284	0.00636175	0.000192491	0.00447372	0.000115454	0.0363545	0.90957	4.07614	3.17876e-05	7.36639e-05	0.000147201	0.00566979	0.00435297	1.90372e-05	0.0001426	0.00842011	0.00619588	6.89601e-06	1.66963e-05	0.0291654	0.479359	0.467787
H14	0.0224618	0.00178605	0.000239458	0.00353271	0.464883	0.00497877	0.0192575	0.000653671	0.00818698	0.000145892	3.47926e-05	2.92333e-05	3.17876e-05	0.390112	0.0145047	0.000936034	0.000184648	0.00149877	0.000203269	0.000398058	1.37777e-05	1.78886e-06	1.12114e-05	5.64812e-06	9.87304e-06	5.1078e-06	5.39274e-06
H15	0.0191368	0.000855817	9.51703e-05	0.00822983	0.461722	0.00198622	0.0176602	0.00924693	0.00558085	0.0030148	1.60446e-05	2.47818e-05	7.36639e-05	0.0145047	0.389225	0.000237237	0.000107064	0.0045102	0.0040078	0.00328692	5.28113e-06	2.31467e-06	0.000137443	9.69324e-05	3.62297e-06	1.7714e-05	1.58447e-05
H16	0.0226164	2.47564e-05	3.53095e-05	0.00466003	0.00498001	0.464096	0.00077781	0.0182685	0.000399596	0.00733251	1.97195e-05	0.000185842	0.000147201	0.000936034	0.000237237	0.390931	0.0139016	1.74135e-05	0.00391627	5.20977e-05	2.14908e-06	7.16246e-06	0.00273589	0.000458963	0.000290976	1.43426e-05	0.000193928
H17	0.0226042	0.000496084	0.00118049	0.00494487	0.00262837	0.447886	0.00800784	0.0168617	0.00757034	0.0055653	0.00056492	0.00946297	0.00566979	0.000184648	0.000107064	0.0139016	0.356322	0.000197003	0.00230512	0.00039975	3.26358e-05	0.000180058	0.000401209	0.000744149	0.00767279	0.000280564	0.00175561
H18	0.00137702	0.0117364	0.00133161	0.00732455	0.017291	0.000156266	0.459782	0.000131716	0.0266492	7.91622e-05	0.000190182	0.00153759	0.00435297	0.00149877	0.0045102	1.74135e-05	0.000197003	0.369931	0.000132453	0.00590195	4.84449e-05	2.47992e-05	5.70025e-06	3.68829e-06	5.75716e-05	0.000861801	0.000357482
H19	0.00139314	0.000639189	0.000590228	0.000675995	0.00235088	0.019287	0.000710094	0.470353	0.00327159	0.0295485	2.37304e-05	3.33649e-05	1.90372e-05	0.000203269	0.0040078	0.00391627	0.00230512	0.000132453	0.409269	0.00444365	1.18298e-06	1.30491e-05	0.00665319	0.00368483	2.47973e-05	2.78452e-06	6.28848e-06
H20	0.000715522	0.0287327	0.00522109	0.000348266	0.00531619	0.000353877	0.02655	0.00227953	0.465996	0.00027468	0.000333302	0.000143265	0.0001426	0.000398058	0.00328692	5.20977e-05	0.00039975	0.00590195	0.00444365	0.390742	3.07751e-05	0.000136409	0.000121857	3.17993e-05	1.58795e-05	7.61182e-05	5.9419e-06
H21	7.65336e-05	0.00822144	0.0271244	3.4019e-05	4.54643e-05	1.13726e-05	0.000669385	1.17078e-06	0.00047744	7.34576e-07	0.464894	0.0189227	0.00842011	1.37777e-05	5.28113e-06	2.14908e-06	3.26358e-05	4.84449e-05	1.18298e-06	3.07751e-05	0.399906	0.0146896	1.7275e-07	1.04471e-07	0.00168124	0.000494854	0.000761755
H22	1.82016e-05	0.00648681	0.029543	2.0531e-05	5.74666e-06	9.09069e-05	7.56612e-05	9.18755e-06	0.000342436	3.06185e-06	0.46351	0.0183229	0.00619588	1.78886e-06	2.31467e-06	7.16246e-06	0.000180058	2.47992e-05	1.30491e-05	0.000136409	0.0146896	0.39342	3.67596e-07	6.58857e-07	0.00496263	0.00408688	0.00040485
H23	0.00189352	1.42057e-05	1.446e-05	0.000501111	0.000167175	0.00595359	6.28808e-05	0.0298999	9.09153e-05	0.480663	8.68273e-07	6.76449e-06	6.89601e-06	1.12114e-05	0.000137443	0.00273589	0.000401209	5.70025e-06	0.00665319	0.000121857	1.7275e-07	3.67596e-07	0.408629	0.0166429	6.04269e-06	4.06556e-07	5.19323e-06
H24	0.000905499	4.97233e-06	5.59681e-06	0.000464086	7.79623e-05	0.00634783	2.92518e-05	0.0299525	3.34591e-05	0.48311	1.341e-06	1.86424e-05	1.66963e-05	5.64812e-06	9.69324e-05	0.000458963	0.000744149	3.68829e-06	0.00368483	3.17993e-05	1.04471e-07	6.58857e-07	0.0166429	0.406425	1.4815e-05	7.61508e-07	9.54584e-06
H25	0.000702094	0.000495986	0.00537113	0.000253316	4.43576e-05	0.0040484	0.00017489	0.000248391	0.000340129	0.000125003	0.0200718	0.470443	0.0291654	9.87304e-06	3.62297e-06	0.000290976	0.00767279	5.75716e-05	2.47973e-05	1.58795e-05	0.00168124	0.00496263	6.04269e-06	1.4815e-05	0.417608	0.00693079	0.00339496
H26	4.18529e-05	0.00380749	0.00135687	0.000477877	3.83696e-05	9.44089e-05	0.000434168	1.0877e-05	0.000229028	6.60232e-06	0.00639949	0.0301031	0.479359	5.1078e-06	1.7714e-05	1.43426e-05	0.000280564	0.000861801	2.78452e-06	7.61182e-05	0.000494854	0.00408688	4.06556e-07	7.61508e-07	0.00693079	0.412464	0.0154072
H27	0.00117135	0.000341071	0.00133027	0.0174031	7.51498e-05	0.00134525	0.000399523	0.000160188	0.000148949	8.6057e-05	0.00580309	0.0274538	0.467787	5.39274e-06	1.58447e-05	0.000193928	0.00175561	0.000357482	6.28848e-06	5.9419e-06	0.000761755	0.00040485	5.19323e-06	9.54584e-06	0.00339496	0.0154072	0.36587
LDM — ajoene_e_10_LIDI_matrix
	S1	S2	S3	O4	C5	C6	C7	C8	C9	C10	C11	C12	C13	H14	H15	H16	H17	H18	H19	H20	H21	H22	H23	H24	H25	H26	H27
S1	12.9355	0.00241215	0.00195604	0.682456	0.460294	0.468032	0.0274996	0.0299774	0.0173476	0.0164692	0.00017066	0.000524537	0.000781677	0.0198211	0.0220762	0.0227455	0.0211055	0.00142395	0.00188915	0.00080756	1.83295e-05	7.44418e-05	0.000726821	0.00100462	0.000579029	0.00129842	5.12982e-05		92.2676	31.733	63.466
S2	0.00241215	14.545	0.648545	0.000611487	0.00916867	0.000439992	0.0580097	5.23788e-05	0.573271	9.49364e-05	0.0377096	0.0110652	0.00978857	0.000942747	0.00181348	0.000765375	6.38261e-05	0.0113355	8.94836e-06	0.0288923	0.00587395	0.00827893	4.05912e-06	4.38545e-06	0.000481739	0.000331705	0.00384223
S3	0.00195604	0.648545	14.6527	0.000536185	0.00180481	0.000429825	0.0170431	7.34391e-05	0.043279	7.24628e-05	0.525572	0.0396685	0.0235543	9.80166e-05	0.000224131	0.00163542	3.29441e-05	0.00124129	2.13239e-05	0.00635335	0.0296599	0.0271863	3.1246e-06	4.21696e-06	0.00512732	0.00131515	0.00133718
O4	0.682456	0.000611487	0.000536185	8.34435	0.0615188	0.0604837	0.0138554	0.0119683	0.00311468	0.00315171	0.000300432	0.00176065	0.0112892	0.00822211	0.00319908	0.00356166	0.00835302	0.00763382	0.00783984	0.000359798	2.40633e-05	3.52828e-05	0.000412261	0.000195822	0.000247998	0.0200782	0.00053679
C5	0.460294	0.00916867	0.00180481	0.0615188	4.06509	0.0249464	0.518087	0.00464326	0.0361879	0.00171916	0.000115381	0.00015239	0.000263618	0.465826	0.465525	0.00427228	0.00277159	0.0173546	0.000211881	0.00565576	6.15993e-06	4.47091e-05	9.97117e-05	0.000240686	5.23034e-05	7.64983e-05	3.13252e-05
C6	0.468032	0.000439992	0.000429825	0.0604837	0.0249464	4.07717	0.00753085	0.517027	0.00548404	0.0383664	0.000220176	0.00331415	0.00187831	0.00436244	0.00469892	0.444475	0.466421	0.000205961	0.0185922	0.000832598	8.40566e-05	1.19396e-05	0.00633457	0.00639954	0.00397842	0.000913511	8.31326e-05
C7	0.0274996	0.0580097	0.0170431	0.0138554	0.518087	0.00753085	3.94308	0.000773913	0.874867	0.000381855	0.00145248	0.00399976	0.00629146	0.0180292	0.0191672	0.0104394	0.000401364	0.460281	2.91978e-05	0.0263393	8.03237e-05	0.000659503	2.29808e-05	5.23214e-05	0.000186504	0.000450776	0.000362859
C8	0.0299774	5.23788e-05	7.34391e-05	0.0119683	0.00464326	0.517027	0.000773913	3.97922	0.000538319	0.921681	0.000215601	0.00195776	0.000952277	0.000507393	0.000987288	0.0173716	0.0179818	2.144e-05	0.465374	0.000126019	7.96937e-05	1.44403e-05	0.0306217	0.0301199	0.00465987	0.00202351	0.000119535
C9	0.0173476	0.573271	0.043279	0.00311468	0.0361879	0.00548404	0.874867	0.000538319	4.08321	0.000734343	0.00214412	0.00561071	0.00482547	0.0059838	0.00811595	0.0115754	0.000312238	0.0265915	1.80481e-05	0.466482	0.0003372	0.000448676	2.86076e-05	4.35483e-05	0.000395671	0.000167061	0.000230044
C10	0.0164692	9.49364e-05	7.24628e-05	0.00315171	0.00171916	0.0383664	0.000381855	0.921681	0.000734343	4.08043	4.1722e-05	0.000316621	0.000152633	7.62061e-05	0.000519089	0.00927244	0.00634703	9.91765e-06	0.0279362	5.09473e-05	9.681e-06	3.97602e-06	0.481828	0.483183	0.00141129	0.000232724	1.98126e-05
C11	0.00017066	0.0377096	0.525572	0.000300432	0.000115381	0.000220176	0.00145248	0.000215601	0.00214412	4.1722e-05	4.00887	0.517601	0.0365856	1.58458e-05	3.5875e-05	0.000477946	1.32416e-05	0.000170716	0.000145411	0.000337203	0.463738	0.464817	2.39943e-06	1.56435e-06	0.0197407	0.00574902	0.00649808
C12	0.000524537	0.0110652	0.0396685	0.00176065	0.00015239	0.00331415	0.00399976	0.00195776	0.00561071	0.000316621	0.517601	3.9729	0.909792	2.06545e-05	3.53323e-05	0.00806657	0.000207478	0.00130141	0.00125092	0.000162961	0.0183673	0.0188355	2.81732e-05	1.61712e-05	0.468175	0.0271602	0.03015
C13	0.000781677	0.00978857	0.0235543	0.0112892	0.000263618	0.00187831	0.00629146	0.000952277	0.00482547	0.000152633	0.0365856	0.909792	4.07687	6.86373e-05	3.81089e-05	0.00393111	0.000167031	0.00366233	0.0024464	0.000138758	0.00631373	0.00838972	4.15747e-05	1.18191e-05	0.0287257	0.464823	0.479378
H14	0.0198211	0.000942747	9.80166e-05	0.00822211	0.465826	0.00436244	0.0180292	0.000507393	0.0059838	7.62061e-05	1.58458e-05	2.06545e-05	6.86373e-05	0.399851	0.0149151	0.000368251	0.00274111	0.00468542	0.000115792	0.00377737	2.29528e-06	4.60261e-06	1.357e-05	1.11812e-05	3.21085e-06	1.84126e-05	1.49241e-05
H15	0.0220762	0.00181348	0.000224131	0.00319908	0.465525	0.00469892	0.0191672	0.000987288	0.00811595	0.000519089	3.5875e-05	3.53323e-05	3.81089e-05	0.0149151	0.390929	0.000305699	0.00020725	0.00144833	1.67055e-05	0.000418048	1.40915e-06	1.37513e-05	2.56712e-05	6.81718e-05	5.97972e-06	5.07671e-06	5.07796e-06
H16	0.0227455	0.000765375	0.00163542	0.00356166	0.00427228	0.444475	0.0104394	0.0173716	0.0115754	0.00927244	0.000477946	0.00806657	0.00393111	0.000368251	0.000305699	0.355686	0.0137644	0.000217295	0.00105848	0.0014637	0.000158098	2.7302e-05	0.00044447	0.000689604	0.00655148	0.000742691	0.000196829
H17	0.0211055	6.38261e-05	3.29441e-05	0.00835302	0.00277159	0.466421	0.000401364	0.0179818	0.000312238	0.00634703	1.32416e-05	0.000207478	0.000167031	0.00274111	0.00020725	0.0137644	0.405526	7.60931e-05	0.00500034	0.000223693	3.97071e-06	8.89446e-07	0.00405021	0.000469546	0.000172369	9.33117e-05	4.65512e-06
H18	0.00142395	0.0113355	0.00124129	0.00763382	0.0173546	0.000205961	0.460281	2.144e-05	0.0265915	9.91765e-06	0.000170716	0.00130141	0.00366233	0.00468542	0.00144833	0.000217295	7.60931e-05	0.370565	5.63284e-06	0.00594322	2.20287e-05	4.14905e-05	9.62845e-07	1.38655e-06	4.76986e-05	0.000340752	0.000636105
H19	0.00188915	8.94836e-06	2.13239e-05	0.00783984	0.000211881	0.0185922	2.91978e-05	0.465374	1.80481e-05	0.0279362	0.000145411	0.00125092	0.0024464	0.000115792	1.67055e-05	0.00105848	0.00500034	5.63284e-06	0.387282	1.04293e-05	4.03568e-05	1.7524e-05	0.00645308	0.00354871	0.00168034	0.00347907	0.000232701
H20	0.00080756	0.0288923	0.00635335	0.000359798	0.00565576	0.000832598	0.0263393	0.000126019	0.466482	5.09473e-05	0.000337203	0.000162961	0.000138758	0.00377737	0.000418048	0.0014637	0.000223693	0.00594322	1.04293e-05	0.389281	0.000143856	2.47267e-05	3.3978e-06	5.19968e-06	2.48318e-05	6.75721e-06	7.03263e-05
H21	1.83295e-05	0.00587395	0.0296599	2.40633e-05	6.15993e-06	8.40566e-05	8.03237e-05	7.96937e-05	0.0003372	9.681e-06	0.463738	0.0183673	0.00631373	2.29528e-06	1.40915e-06	0.000158098	3.97071e-06	2.20287e-05	4.03568e-05	0.000143856	0.394142	0.0147209	1.0389e-06	5.23833e-07	0.00486731	0.000402079	0.00420324
H22	7.44418e-05	0.00827893	0.0271863	3.52828e-05	4.47091e-05	1.19396e-05	0.000659503	1.44403e-05	0.000448676	3.97602e-06	0.464817	0.0188355	0.00838972	4.60261e-06	1.37513e-05	2.7302e-05	8.89446e-07	4.14905e-05	1.7524e-05	2.47267e-05	0.0147209	0.399801	2.92969e-07	1.52446e-07	0.00164734	0.000755194	0.000501653
H23	0.000726821	4.05912e-06	3.1246e-06	0.000412261	9.97117e-05	0.00633457	2.29808e-05	0.0306217	2.86076e-05	0.481828	2.39943e-06	2.81732e-05	4.15747e-05	1.357e-05	2.56712e-05	0.00044447	0.00405021	9.62845e-07	0.00645308	3.3978e-06	1.0389e-06	2.92969e-07	0.415769	0.0168625	6.95712e-05	9.27752e-05	3.96744e-06
H24	0.00100462	4.38545e-06	4.21696e-06	0.000195822	0.000240686	0.00639954	5.23214e-05	0.0301199	4.35483e-05	0.483183	1.56435e-06	1.61712e-05	1.18191e-05	1.11812e-05	6.81718e-05	0.000689604	0.000469546	1.38655e-06	0.00354871	5.19968e-06	5.23833e-07	1.52446e-07	0.0168625	0.407166	4.48369e-05	2.12795e-05	1.03396e-06
H25	0.000579029	0.000481739	0.00512732	0.000247998	5.23034e-05	0.00397842	0.000186504	0.00465987	0.000395671	0.00141129	0.0197407	0.468175	0.0287257	3.21085e-06	5.97972e-06	0.00655148	0.000172369	4.76986e-05	0.00168034	2.48318e-05	0.00486731	0.00164734	6.95712e-05	4.48369e-05	0.412023	0.00328486	0.00686568
H26	0.00129842	0.000331705	0.00131515	0.0200782	7.64983e-05	0.000913511	0.000450776	0.00202351	0.000167061	0.000232724	0.00574902	0.0271602	0.464823	1.84126e-05	5.07671e-06	0.000742691	9.33117e-05	0.000340752	0.00347907	6.75721e-06	0.000402079	0.000755194	9.27752e-05	2.12795e-05	0.00328486	0.362379	0.0151941
H27	5.12982e-05	0.00384223	0.00133718	0.00053679	3.13252e-05	8.31326e-05	0.000362859	0.000119535	0.000230044	1.98126e-05	0.00649808	0.03015	0.479378	1.49241e-05	5.07796e-06	0.000196829	4.65512e-06	0.000636105	0.000232701	7.03263e-05	0.00420324	0.000501653	3.96744e-06	1.03396e-06	0.00686568	0.0151941	0.41282
LDM — ajoene_e_11_LIDI_matrix
	S1	S2	S3	O4	C5	C6	C7	C8	C9	C10	C11	C12	C13	H14	H15	H16	H17	H18	H19	H20	H21	H22	H23	H24	H25	H26	H27
S1	12.946	0.00177365	0.00349405	0.68181	0.456762	0.469157	0.0287226	0.0303212	0.0197215	0.0151929	0.000681605	0.000119402	0.00045248	0.0193283	0.0218712	0.0215291	0.0228757	0.00114131	0.00464528	0.000856902	0.0014773	4.9995e-05	0.0010505	0.000796775	5.47465e-05	0.000908084	4.27185e-05		92.2831	31.715	63.43
S2	0.00177365	14.5923	0.637256	0.00049533	0.0091992	0.000537459	0.0509017	6.19158e-05	0.569432	0.000102452	0.0383562	0.00966673	0.00468412	0.000899914	0.00146926	0.000179056	0.00102874	0.0123102	2.68372e-05	0.0290052	0.00311439	0.00838526	8.49732e-06	0.000371504	0.000438565	0.000189143	0.000503166
S3	0.00349405	0.637256	14.6387	0.00171586	0.00183108	0.00419317	0.0245478	0.00040751	0.0475244	0.00134294	0.527318	0.0402828	0.0176621	0.000210912	0.000318105	0.000204597	0.012758	0.00144694	0.000261532	0.00288705	0.0257466	0.0302689	0.000139524	0.00437767	0.00597434	0.000796548	0.00114568
O4	0.68181	0.00049533	0.00171586	8.33027	0.0612974	0.061117	0.0159714	0.0100443	0.00380565	0.00520478	0.00885983	0.000915463	0.00658707	0.00790162	0.00297355	0.00857994	0.00495335	0.00588599	0.00061269	0.000320399	0.0208112	0.000471648	0.0002312	0.000359949	0.000465663	0.0146116	0.000559828
C5	0.456762	0.0091992	0.00183108	0.0612974	4.06537	0.023914	0.519221	0.00508324	0.03555	0.0020653	0.00020873	3.92956e-05	0.000109083	0.465281	0.467415	0.00443776	0.00241931	0.0175119	0.00029911	0.00531631	0.000380945	1.6268e-05	0.000226795	9.83343e-05	1.36342e-05	0.000222913	8.50358e-06
C6	0.469157	0.000537459	0.00419317	0.061117	0.023914	4.07312	0.0062419	0.517324	0.00657066	0.0378224	0.000375998	9.99988e-05	0.000272741	0.00482616	0.00456496	0.464203	0.447291	0.000210517	0.0202482	0.00206807	0.000750186	2.65176e-05	0.00635133	0.00592153	1.35486e-05	0.00035047	2.27401e-05
C7	0.0287226	0.0509017	0.0245478	0.0159714	0.519221	0.0062419	3.94151	0.000838494	0.874267	0.000123755	0.00403871	0.000597583	0.00030866	0.0180204	0.0188211	0.000422183	0.00645378	0.460642	0.000215952	0.0268159	0.00758779	0.000249818	1.48029e-05	3.18155e-05	0.000199656	3.5466e-05	1.83401e-05
C8	0.0303212	6.19158e-05	0.00040751	0.0100443	0.00508324	0.517324	0.000838494	3.97989	0.000679444	0.917988	6.34898e-05	0.000737754	0.00198595	0.000503275	0.000910514	0.0189788	0.0163435	2.96461e-05	0.474444	0.000268268	6.09215e-05	1.5047e-05	0.0303492	0.0283195	5.27022e-05	0.00246989	9.17268e-05
C9	0.0197215	0.569432	0.0475244	0.00380565	0.03555	0.00657066	0.874267	0.000679444	4.08001	0.000289672	0.00423048	0.000669817	0.00019082	0.0058796	0.00688107	0.000715326	0.011245	0.0267456	0.000252531	0.467296	0.00358493	0.000482532	1.86587e-05	8.47102e-05	0.000196539	3.26998e-05	1.72989e-05
C10	0.0151929	0.000102452	0.00134294	0.00520478	0.0020653	0.0378224	0.000123755	0.917988	0.000289672	4.06827	0.000192424	0.0027202	0.00917204	0.000265605	0.000494721	0.0100941	0.00591184	9.50844e-06	0.0295022	6.06063e-05	7.29265e-05	6.60498e-05	0.483087	0.470454	0.000130403	0.00531562	0.000449108
C11	0.000681605	0.0383562	0.527318	0.00885983	0.00020873	0.000375998	0.00403871	6.34898e-05	0.00423048	0.000192424	4.02932	0.5151	0.037508	4.84689e-05	1.85909e-05	3.90949e-05	0.00124238	0.00258009	1.94832e-05	0.000366454	0.443681	0.464283	1.32027e-05	0.000431644	0.020046	0.00540899	0.00639769
C12	0.000119402	0.00966673	0.0402828	0.000915463	3.92956e-05	9.99988e-05	0.000597583	0.000737754	0.000669817	0.0027202	0.5151	3.98706	0.916248	6.85957e-06	8.62421e-06	1.75463e-05	0.000205849	0.000304094	9.93253e-05	6.97367e-05	0.0164614	0.0191054	0.000125497	0.00511984	0.474962	0.0272692	0.0308188
C13	0.00045248	0.00468412	0.0176621	0.00658707	0.000109083	0.000272741	0.00030866	0.00198595	0.00019082	0.00917204	0.037508	0.916248	4.08348	2.21685e-05	1.31094e-05	4.61352e-05	0.000227818	5.29675e-05	0.000168668	1.87788e-05	0.0057776	0.00986204	0.00038978	0.00985168	0.0296954	0.464457	0.484532
H14	0.0193283	0.000899914	0.000210912	0.00790162	0.465281	0.00482616	0.0180204	0.000503275	0.0058796	0.000265605	4.84689e-05	6.85957e-06	2.21685e-05	0.396562	0.0148146	0.00448427	0.000208281	0.00441849	1.55141e-05	0.00327456	9.1041e-05	8.33945e-06	3.21292e-05	1.16208e-05	2.26104e-06	3.90111e-05	1.9885e-06
H15	0.0218712	0.00146926	0.000318105	0.00297355	0.467415	0.00456496	0.0188211	0.000910514	0.00688107	0.000494721	1.85909e-05	8.62421e-06	1.31094e-05	0.0148146	0.392469	0.000331788	0.000144853	0.0018574	1.21444e-05	0.00040837	2.44156e-05	2.08289e-06	6.77381e-05	2.41818e-05	1.14479e-06	1.05554e-05	1.23354e-06
H16	0.0215291	0.000179056	0.000204597	0.00857994	0.00443776	0.464203	0.000422183	0.0189788	0.000715326	0.0100941	3.90949e-05	1.75463e-05	4.61352e-05	0.00448427	0.000331788	0.404347	0.0138306	0.000114887	0.00135446	0.000906751	6.44983e-05	4.94543e-06	0.00076504	0.000458096	1.36867e-06	5.27818e-05	2.20105e-06
H17	0.0228757	0.00102874	0.012758	0.00495335	0.00241931	0.447291	0.00645378	0.0163435	0.011245	0.00591184	0.00124238	0.000205849	0.000227818	0.000208281	0.000144853	0.0138306	0.357043	0.000143718	0.00454812	0.00233455	0.0012169	0.000171984	0.000408488	0.00355538	2.28933e-05	0.000131331	1.34527e-05
H18	0.00114131	0.0123102	0.00144694	0.00588599	0.0175119	0.000210517	0.460642	2.96461e-05	0.0267456	9.50844e-06	0.00258009	0.000304094	5.29675e-05	0.00441849	0.0018574	0.000114887	0.000143718	0.374741	5.92715e-06	0.00601465	0.00392163	0.000314518	1.10284e-06	3.66311e-06	8.43575e-05	1.26367e-05	3.80237e-06
H19	0.00464528	2.68372e-05	0.000261532	0.00061269	0.00029911	0.0202482	0.000215952	0.474444	0.000252531	0.0295022	1.94832e-05	9.93253e-05	0.000168668	1.55141e-05	1.21444e-05	0.00135446	0.00454812	5.92715e-06	0.414782	4.09877e-05	2.26306e-05	2.83404e-06	0.00369058	0.00634039	3.99046e-06	6.80434e-05	3.60178e-06
H20	0.000856902	0.0290052	0.00288705	0.000320399	0.00531631	0.00206807	0.0268159	0.000268268	0.467296	6.06063e-05	0.000366454	6.97367e-05	1.87788e-05	0.00327456	0.00040837	0.000906751	0.00233455	0.00601465	4.09877e-05	0.391933	0.000130348	0.000152125	6.81357e-06	1.35764e-05	7.46127e-06	2.39033e-06	3.72286e-06
H21	0.0014773	0.00311439	0.0257466	0.0208112	0.000380945	0.000750186	0.00758779	6.09215e-05	0.00358493	7.29265e-05	0.443681	0.0164614	0.0057776	9.1041e-05	2.44156e-05	6.44983e-05	0.0012169	0.00392163	2.26306e-05	0.000130348	0.349082	0.0136146	3.65644e-06	7.32095e-05	0.00446302	0.00293636	0.000393998
H22	4.9995e-05	0.00838526	0.0302689	0.000471648	1.6268e-05	2.65176e-05	0.000249818	1.5047e-05	0.000482532	6.60498e-05	0.464283	0.0191054	0.00986204	8.33945e-06	2.08289e-06	4.94543e-06	0.000171984	0.000314518	2.83404e-06	0.000152125	0.0136146	0.39647	2.03793e-06	0.000153425	0.00125849	0.00042654	0.000810859
H23	0.0010505	8.49732e-06	0.000139524	0.0002312	0.000226795	0.00635133	1.48029e-05	0.0303492	1.86587e-05	0.483087	1.32027e-05	0.000125497	0.00038978	3.21292e-05	6.77381e-05	0.00076504	0.000408488	1.10284e-06	0.00369058	6.81357e-06	3.65644e-06	2.03793e-06	0.409753	0.0159229	2.99286e-06	0.000141415	7.95245e-05
H24	0.000796775	0.000371504	0.00437767	0.000359949	9.83343e-05	0.00592153	3.18155e-05	0.0283195	8.47102e-05	0.470454	0.000431644	0.00511984	0.00985168	1.16208e-05	2.41818e-05	0.000458096	0.00355538	3.66311e-06	0.00634039	1.35764e-05	7.32095e-05	0.000153425	0.0159229	0.384559	0.000125785	0.00153864	0.00036489
H25	5.47465e-05	0.000438565	0.00597434	0.000465663	1.36342e-05	1.35486e-05	0.000199656	5.27022e-05	0.000196539	0.000130403	0.020046	0.474962	0.0296954	2.26104e-06	1.14479e-06	1.36867e-06	2.28933e-05	8.43575e-05	3.99046e-06	7.46127e-06	0.00446302	0.00125849	2.99286e-06	0.000125785	0.41608	0.00612193	0.00367097
H26	0.000908084	0.000189143	0.000796548	0.0146116	0.000222913	0.00035047	3.5466e-05	0.00246989	3.26998e-05	0.00531562	0.00540899	0.0272692	0.464457	3.90111e-05	1.05554e-05	5.27818e-05	0.000131331	1.26367e-05	6.80434e-05	2.39033e-06	0.00293636	0.00042654	0.000141415	0.00153864	0.00612193	0.363202	0.0154581
H27	4.27185e-05	0.000503166	0.00114568	0.000559828	8.50358e-06	2.27401e-05	1.83401e-05	9.17268e-05	1.72989e-05	0.000449108	0.00639769	0.0308188	0.484532	1.9885e-06	1.23354e-06	2.20105e-06	1.34527e-05	3.80237e-06	3.60178e-06	3.72286e-06	0.000393998	0.000810859	7.95245e-05	0.00036489	0.00367097	0.0154581	0.416769
LDM — ajoene_e_12_LIDI_matrix
	S1	S2	S3	O4	C5	C6	C7	C8	C9	C10	C11	C12	C13	H14	H15	H16	H17	H18	H19	H20	H21	H22	H23	H24	H25	H26	H27
S1	12.9332	0.00314279	0.000396159	0.686982	0.464402	0.464461	0.0287819	0.0280892	0.0132826	0.0172761	0.000154198	0.000154759	0.000393866	0.0224132	0.0234489	0.0229366	0.0186892	0.00424526	0.00204605	0.000761676	1.77117e-05	4.60596e-05	0.000737416	0.00131621	1.78715e-05	0.000386995	2.51855e-05		92.2589	31.7406	63.4812
S2	0.00314279	14.5168	0.659196	0.00138884	0.00949306	0.000420471	0.0673111	0.000131456	0.579376	0.000355918	0.0390631	0.00805289	0.00587342	0.00216264	0.000737207	3.75484e-05	0.0005876	0.0103656	1.41357e-05	0.0255442	0.00836898	0.00801905	0.000414508	1.0158e-05	0.000500334	0.000238878	0.00203351
S3	0.000396159	0.659196	14.6233	0.000319312	0.00174031	0.000197511	0.00963832	5.07534e-05	0.0402679	0.00021512	0.527247	0.040751	0.0215042	0.000197133	9.67872e-05	1.02165e-05	0.000331943	0.00129389	1.63057e-05	0.0128844	0.028631	0.0269545	0.000788957	1.38953e-05	0.00598946	0.00139275	0.00126372
O4	0.686982	0.00138884	0.000319312	8.37186	0.0625218	0.0616555	0.0093399	0.0144573	0.00497025	0.00325847	7.60879e-05	0.000153555	0.000326605	0.00570377	0.00483706	0.00345888	0.00770657	0.000732977	0.0110251	0.000269549	8.32964e-06	2.80549e-05	0.000407037	0.000281303	1.56091e-05	0.000290571	2.08731e-05
C5	0.464402	0.00949306	0.00174031	0.0625218	4.06416	0.0236585	0.520003	0.00790653	0.0363421	0.00463638	0.000143967	5.79907e-05	0.000107224	0.462658	0.455527	0.00505647	0.00231427	0.0185972	0.000174679	0.00537284	1.52309e-05	5.18605e-05	0.000202921	0.000143643	5.96488e-06	3.75755e-05	8.01886e-06
C6	0.464461	0.000420471	0.000197511	0.0616555	0.0236585	4.07498	0.00718802	0.517664	0.00417366	0.0367825	0.000109938	0.00132577	0.00454454	0.00454749	0.0034651	0.465843	0.45324	0.000308215	0.0186289	0.000272549	5.78077e-06	2.09391e-05	0.00547228	0.00632177	9.25679e-05	0.0033012	0.000179994
C7	0.0287819	0.0673111	0.00963832	0.0093399	0.520003	0.00718802	3.96254	0.000787416	0.876179	0.000604247	0.00184675	0.000678919	0.00158221	0.0189161	0.0174023	0.000707575	0.00925265	0.470197	0.000125296	0.0239841	0.000230753	0.000488684	0.000538046	2.92951e-05	1.73899e-05	6.69505e-05	0.00011098
C8	0.0280892	0.000131456	5.07534e-05	0.0144573	0.00790653	0.517664	0.000787416	3.97298	0.000873803	0.913932	2.91578e-05	0.000299893	0.000719928	0.000697118	0.0108262	0.0194324	0.0168174	0.000166143	0.466102	0.0013734	6.81489e-06	2.29466e-06	0.0294417	0.0300007	0.000386661	0.00147988	6.48514e-05
C9	0.0132826	0.579376	0.0402679	0.00497025	0.0363421	0.00417366	0.876179	0.000873803	4.09837	0.00227961	0.0020482	0.00457764	0.00437331	0.0089213	0.00565719	0.000300999	0.00736697	0.0296877	0.000131159	0.458098	0.000304612	0.00050442	0.00320836	0.000102401	0.000224869	0.000117192	0.000263242
C10	0.0172761	0.000355918	0.00021512	0.00325847	0.00463638	0.0367825	0.000604247	0.913932	0.00227961	4.08844	0.000151749	0.00281057	0.00284199	0.000375498	0.00927435	0.00986379	0.00502493	0.000188236	0.0277265	0.00466198	5.49284e-05	1.03355e-05	0.4713	0.483665	0.00265808	0.00265958	0.00014078
C11	0.000154198	0.0390631	0.527247	7.60879e-05	0.000143967	0.000109938	0.00184675	2.91578e-05	0.0020482	0.000151749	4.01427	0.517505	0.0361404	5.93113e-05	6.12359e-06	1.36272e-05	0.000180161	8.45178e-05	1.03089e-05	0.000308924	0.462593	0.463429	0.000459772	8.38686e-06	0.0196173	0.00612713	0.00612781
C12	0.000154759	0.00805289	0.040751	0.000153555	5.79907e-05	0.00132577	0.000678919	0.000299893	0.00457764	0.00281057	0.517505	3.9678	0.910253	2.48176e-05	7.27359e-06	6.39426e-05	0.00332692	4.29705e-05	0.000167389	0.00140272	0.0182318	0.0194965	0.00794849	0.000216539	0.470229	0.0292836	0.0296889
C13	0.000393866	0.00587342	0.0215042	0.000326605	0.000107224	0.00454454	0.00158221	0.000719928	0.00437331	0.00284199	0.0361404	0.910253	4.07741	6.30656e-05	9.19247e-06	0.000278224	0.0105142	5.54373e-05	0.000181557	0.000666099	0.00606598	0.00909301	0.00591064	0.000216753	0.0288679	0.477237	0.479606
H14	0.0224132	0.00216264	0.000197133	0.00570377	0.462658	0.00454749	0.0189161	0.000697118	0.0089213	0.000375498	5.93113e-05	2.48176e-05	6.30656e-05	0.387993	0.0139768	0.000977927	0.000262504	0.00141293	1.68695e-05	0.000412779	6.39258e-06	8.91127e-06	1.8496e-05	9.47874e-06	9.19038e-07	1.49824e-05	4.02637e-06
H15	0.0234489	0.000737207	9.67872e-05	0.00483706	0.455527	0.0034651	0.0174023	0.0108262	0.00565719	0.00927435	6.12359e-06	7.27359e-06	9.19247e-06	0.0139768	0.374176	0.000261098	0.000140155	0.0047122	0.000337477	0.00322021	2.06158e-06	1.24678e-06	0.000390656	0.000236934	3.09653e-06	1.49795e-05	1.21644e-06
H16	0.0229366	3.75484e-05	1.02165e-05	0.00345888	0.00505647	0.465843	0.000707575	0.0194324	0.000300999	0.00986379	1.36272e-05	6.39426e-05	0.000278224	0.000977927	0.000261098	0.396492	0.0142715	1.78099e-05	0.00113945	4.19731e-05	4.43862e-07	1.96261e-06	0.000448837	0.000785289	7.57062e-06	0.000385662	1.45165e-05
H17	0.0186892	0.0005876	0.000331943	0.00770657	0.00231427	0.45324	0.00925265	0.0168174	0.00736697	0.00502493	0.000180161	0.00332692	0.0105142	0.000262504	0.000140155	0.0142715	0.372579	0.000234235	0.00456681	0.000410811	9.00244e-06	6.39052e-05	0.00279399	0.000347148	0.000123214	0.00428874	0.000654905
H18	0.00424526	0.0103656	0.00129389	0.000732977	0.0185972	0.000308215	0.470197	0.000166143	0.0296877	0.000188236	8.45178e-05	4.29705e-05	5.54373e-05	0.00141293	0.0047122	1.78099e-05	0.000234235	0.403899	1.21867e-05	0.006036	2.17858e-05	2.62515e-05	8.32431e-05	8.54192e-06	6.61494e-06	2.33023e-06	6.75684e-06
H19	0.00204605	1.41357e-05	1.63057e-05	0.0110251	0.000174679	0.0186289	0.000125296	0.466102	0.000131159	0.0277265	1.03089e-05	0.000167389	0.000181557	1.68695e-05	0.000337477	0.00113945	0.00456681	1.21867e-05	0.383282	9.27846e-05	3.0135e-06	1.08304e-06	0.006043	0.00354524	0.000117262	6.24964e-05	1.01173e-05
H20	0.000761676	0.0255442	0.0128844	0.000269549	0.00537284	0.000272549	0.0239841	0.0013734	0.458098	0.00466198	0.000308924	0.00140272	0.000666099	0.000412779	0.00322021	4.19731e-05	0.000410811	0.006036	9.27846e-05	0.364986	0.000147382	3.13547e-05	0.00454567	0.000189784	0.00024673	2.51908e-05	2.61492e-05
H21	1.77117e-05	0.00836898	0.028631	8.32964e-06	1.52309e-05	5.78077e-06	0.000230753	6.81489e-06	0.000304612	5.49284e-05	0.462593	0.0182318	0.00606598	6.39258e-06	2.06158e-06	4.43862e-07	9.00244e-06	2.17858e-05	3.0135e-06	0.000147382	0.38931	0.0143358	0.00014526	2.91578e-06	0.00501904	0.000420673	0.0039294
H22	4.60596e-05	0.00801905	0.0269545	2.80549e-05	5.18605e-05	2.09391e-05	0.000488684	2.29466e-06	0.00050442	1.03355e-05	0.463429	0.0194965	0.00909301	8.91127e-06	1.24678e-06	1.96261e-06	6.39052e-05	2.62515e-05	1.08304e-06	3.13547e-05	0.0143358	0.394258	4.18271e-05	8.33958e-07	0.00151913	0.000801044	0.000470005
H23	0.000737416	0.000414508	0.000788957	0.000407037	0.000202921	0.00547228	0.000538046	0.0294417	0.00320836	0.4713	0.000459772	0.00794849	0.00591064	1.8496e-05	0.000390656	0.000448837	0.00279399	8.32431e-05	0.006043	0.00454567	0.00014526	4.18271e-05	0.400192	0.0163081	0.00560893	0.00215955	0.000268359
H24	0.00131621	1.0158e-05	1.38953e-05	0.000281303	0.000143643	0.00632177	2.92951e-05	0.0300007	0.000102401	0.483665	8.38686e-06	0.000216539	0.000216753	9.47874e-06	0.000236934	0.000785289	0.000347148	8.54192e-06	0.00354524	0.000189784	2.91578e-06	8.33958e-07	0.0163081	0.40944	0.000122773	0.000122101	8.40542e-06
H25	1.78715e-05	0.000500334	0.00598946	1.56091e-05	5.96488e-06	9.25679e-05	1.73899e-05	0.000386661	0.000224869	0.00265808	0.0196173	0.470229	0.0288679	9.19038e-07	3.09653e-06	7.57062e-06	0.000123214	6.61494e-06	0.000117262	0.00024673	0.00501904	0.00151913	0.00560893	0.000122773	0.409484	0.00359375	0.00674786
H26	0.000386995	0.000238878	0.00139275	0.000290571	3.75755e-05	0.0033012	6.69505e-05	0.00147988	0.000117192	0.00265958	0.00612713	0.0292836	0.477237	1.49824e-05	1.49795e-05	0.000385662	0.00428874	2.33023e-06	6.24964e-05	2.51908e-05	0.000420673	0.000801044	0.00215955	0.000122101	0.00359375	0.399214	0.0163797
H27	2.51855e-05	0.00203351	0.00126372	2.08731e-05	8.01886e-06	0.000179994	0.00011098	6.48514e-05	0.000263242	0.00014078	0.00612781	0.0296889	0.479606	4.02637e-06	1.21644e-06	1.45165e-05	0.000654905	6.75684e-06	1.01173e-05	2.61492e-05	0.0039294	0.000470005	0.000268359	8.40542e-06	0.00674786	0.0163797	0.407378
LDM — ajoene_e_13_LIDI_matrix
	S1	S2	S3	O4	C5	C6	C7	C8	C9	C10	C11	C12	C13	H14	H15	H16	H17	H18	H19	H20	H21	H22	H23	H24	H25	H26	H27
S1	12.9515	0.00324176	0.00205099	0.679773	0.457159	0.467463	0.0302592	0.0268349	0.0213104	0.0142766	0.000857491	8.53851e-05	0.00031882	0.0228535	0.0205358	0.0227928	0.0232615	0.00140785	0.00422495	0.000924488	0.000103445	0.00157798	0.000764991	0.000942043	5.11039e-05	3.04487e-05	0.000731218		92.3012	31.7008	63.4016
S2	0.00324176	14.5734	0.639783	0.00159613	0.00922134	0.000299991	0.0603701	6.12926e-05	0.577697	9.41448e-05	0.0376703	0.00973703	0.0051455	0.00108357	0.00146277	3.97493e-05	0.000542238	0.0126802	1.95826e-05	0.027336	0.00754203	0.00376005	0.000153209	6.31708e-06	0.0003913	0.000472471	0.00022301
S3	0.00205099	0.639783	14.6433	0.00223775	0.00174456	0.000289939	0.017265	2.88594e-05	0.0450838	1.32059e-05	0.525647	0.0411891	0.0209965	0.000228692	9.13628e-05	3.26134e-05	0.000640284	0.00140099	1.05142e-05	0.0101312	0.0305022	0.0261084	2.04418e-05	1.45575e-06	0.00446518	0.00115322	0.00105156
O4	0.679773	0.00159613	0.00223775	8.32611	0.0605136	0.0617711	0.0145053	0.00932	0.0176243	0.00521103	0.00896486	0.00082183	0.00490363	0.00389229	0.00808919	0.00505285	0.00520996	0.000484533	0.000712128	0.00573246	0.000516382	0.0208021	0.000280851	0.000578946	0.000433162	0.00043765	0.0108595
C5	0.457159	0.00922134	0.00174456	0.0605136	4.06261	0.0223072	0.522147	0.00754525	0.0356763	0.00425175	0.000196355	2.96464e-05	7.57703e-05	0.464413	0.46356	0.00483295	0.00248642	0.0183409	0.00032769	0.00515986	1.48356e-05	0.000231527	0.000276165	0.000107678	8.55586e-06	7.52789e-06	0.000179317
C6	0.467463	0.000299991	0.000289939	0.0617711	0.0223072	4.07011	0.00861726	0.520065	0.0021578	0.0370607	0.000750491	6.97669e-05	5.53086e-05	0.00481706	0.00156322	0.462573	0.455055	0.00230794	0.0197477	0.000172375	0.000187733	0.00204857	0.00596256	0.00628843	2.195e-05	3.14138e-06	7.82909e-05
C7	0.0302592	0.0603701	0.017265	0.0145053	0.522147	0.00861726	3.95546	0.00143278	0.867424	0.00203115	0.00234252	0.000360198	0.000405031	0.0184348	0.0176886	0.00071471	0.0092431	0.465913	0.00016715	0.0237102	0.000165955	0.00336151	0.00204002	7.76795e-05	0.000105431	2.81144e-05	3.0674e-05
C8	0.0268349	6.12926e-05	2.88594e-05	0.00932	0.00754525	0.520065	0.00143278	3.98242	0.000286852	0.916706	6.85819e-05	6.66182e-06	7.33405e-06	0.000819562	0.00863237	0.01885	0.0169724	0.00150561	0.473628	5.50602e-05	1.92664e-05	0.000197452	0.0300155	0.0298924	2.59501e-06	3.65087e-07	1.02592e-05
C9	0.0213104	0.577697	0.0450838	0.0176243	0.0356763	0.0021578	0.867424	0.000286852	4.07531	0.000287746	0.00638611	0.000786199	0.000198591	0.00656545	0.00527564	0.000195024	0.00287221	0.0285362	8.43387e-05	0.459314	0.000456607	0.00715025	0.000282553	1.81988e-05	0.000211018	1.69751e-05	4.35721e-05
C10	0.0142766	9.41448e-05	1.32059e-05	0.00521103	0.00425175	0.0370607	0.00203115	0.916706	0.000287746	4.0773	1.97059e-05	3.05459e-06	4.97601e-06	0.000278918	0.00623074	0.00989854	0.00565582	0.00435647	0.0296263	9.02389e-05	6.95918e-06	4.06402e-05	0.478482	0.482654	5.77899e-07	1.25422e-07	6.39184e-06
C11	0.000857491	0.0376703	0.525647	0.00896486	0.000196355	0.000750491	0.00234252	6.85819e-05	0.00638611	1.97059e-05	4.02752	0.515681	0.0377032	3.32721e-05	3.25133e-05	5.14815e-05	0.00226574	0.000164989	3.46858e-05	0.000383809	0.466874	0.44446	9.13713e-06	1.17815e-06	0.0200855	0.00638021	0.00567881
C12	8.53851e-05	0.00973703	0.0411891	0.00082183	2.96464e-05	6.97669e-05	0.000360198	6.66182e-06	0.000786199	3.05459e-06	0.515681	3.98394	0.921119	4.78682e-06	3.23791e-06	3.98296e-05	0.000213693	2.13211e-05	2.87331e-06	4.28456e-05	0.0192007	0.0164969	9.1505e-07	2.37478e-07	0.475712	0.0307561	0.0285161
C13	0.00031882	0.0051455	0.0209965	0.00490363	7.57703e-05	5.53086e-05	0.000405031	7.33405e-06	0.000198591	4.97601e-06	0.0377032	0.921119	4.08664	8.92135e-06	1.96294e-05	7.1068e-05	4.88591e-05	1.57343e-05	1.58326e-06	1.79751e-05	0.00880438	0.00600717	8.75717e-07	4.63969e-07	0.0299766	0.484883	0.471577
H14	0.0228535	0.00108357	0.000228692	0.00389229	0.464413	0.00481706	0.0184348	0.000819562	0.00656545	0.000278918	3.32721e-05	4.78682e-06	8.92135e-06	0.388317	0.0144663	0.000935795	0.000191258	0.00377665	2.05644e-05	0.00248092	3.71288e-06	2.47012e-05	4.42607e-05	5.55947e-06	1.33963e-06	4.96718e-07	4.98359e-06
H15	0.0205358	0.00146277	9.13628e-05	0.00808919	0.46356	0.00156322	0.0176886	0.00863237	0.00527564	0.00623074	3.25133e-05	3.23791e-06	1.96294e-05	0.0144663	0.386173	0.000186584	0.000105949	0.00230851	0.000367013	0.000344695	2.06806e-06	3.62875e-05	0.000203796	0.000152015	6.04422e-07	2.76956e-06	3.99309e-05
H16	0.0227928	3.97493e-05	3.26134e-05	0.00505285	0.00483295	0.462573	0.00071471	0.01885	0.000195024	0.00989854	5.14815e-05	3.98296e-05	7.1068e-05	0.000935795	0.000186584	0.386396	0.0141054	0.000207959	0.00130723	1.21044e-05	1.03053e-05	0.0001362	0.000487832	0.000776479	4.67285e-06	3.80309e-06	5.53587e-05
H17	0.0232615	0.000542238	0.000640284	0.00520996	0.00248642	0.455055	0.0092431	0.0169724	0.00287221	0.00565582	0.00226574	0.000213693	4.88591e-05	0.000191258	0.000105949	0.0141054	0.376198	0.0034319	0.00489159	9.42183e-05	0.000477069	0.00331448	0.00340251	0.000399838	5.40083e-05	3.41136e-06	2.13494e-05
H18	0.00140785	0.0126802	0.00140099	0.000484533	0.0183409	0.00230794	0.465913	0.00150561	0.0285362	0.00435647	0.000164989	2.13211e-05	1.57343e-05	0.00377665	0.00230851	0.000207959	0.0034319	0.398385	0.000141616	0.00585987	5.08423e-05	0.000125945	0.00418143	0.000253219	3.6915e-06	1.08013e-06	1.26829e-06
H19	0.00422495	1.95826e-05	1.05142e-05	0.000712128	0.00032769	0.0197477	0.00016715	0.473628	8.43387e-05	0.0296263	3.46858e-05	2.87331e-06	1.58326e-06	2.05644e-05	0.000367013	0.00130723	0.00489159	0.000141616	0.408495	6.68165e-06	1.39776e-05	7.80931e-05	0.00669457	0.00367444	1.14667e-06	1.11169e-07	1.25346e-06
H20	0.000924488	0.027336	0.0101312	0.00573246	0.00515986	0.000172375	0.0237102	5.50602e-05	0.459314	9.02389e-05	0.000383809	4.28456e-05	1.79751e-05	0.00248092	0.000344695	1.21044e-05	9.42183e-05	0.00585987	6.68165e-06	0.364707	0.000149299	0.000330582	0.000105353	3.88582e-06	8.10985e-06	1.2918e-06	6.77062e-06
H21	0.000103445	0.00754203	0.0305022	0.000516382	1.48356e-05	0.000187733	0.000165955	1.92664e-05	0.000456607	6.95918e-06	0.466874	0.0192007	0.00880438	3.71288e-06	2.06806e-06	1.03053e-05	0.000477069	5.08423e-05	1.39776e-05	0.000149299	0.405004	0.0138928	8.66239e-06	5.61167e-07	0.00160837	0.000843657	0.000458155
H22	0.00157798	0.00376005	0.0261084	0.0208021	0.000231527	0.00204857	0.00336151	0.000197452	0.00715025	4.06402e-05	0.44446	0.0164969	0.00600717	2.47012e-05	3.62875e-05	0.0001362	0.00331448	0.000125945	7.80931e-05	0.000330582	0.0138928	0.348328	1.16637e-05	2.55142e-06	0.0043657	0.000405574	0.00303301
H23	0.000764991	0.000153209	2.04418e-05	0.000280851	0.000276165	0.00596256	0.00204002	0.0300155	0.000282553	0.478482	9.13713e-06	9.1505e-07	8.75717e-07	4.42607e-05	0.000203796	0.000487832	0.00340251	0.00418143	0.00669457	0.000105353	8.66239e-06	1.16637e-05	0.407513	0.016462	1.70529e-07	3.60553e-08	3.97936e-07
H24	0.000942043	6.31708e-06	1.45575e-06	0.000578946	0.000107678	0.00628843	7.76795e-05	0.0298924	1.81988e-05	0.482654	1.17815e-06	2.37478e-07	4.63969e-07	5.55947e-06	0.000152015	0.000776479	0.000399838	0.000253219	0.00367444	3.88582e-06	5.61167e-07	2.55142e-06	0.016462	0.404908	3.5694e-08	1.27591e-08	6.36633e-07
H25	5.11039e-05	0.0003913	0.00446518	0.000433162	8.55586e-06	2.195e-05	0.000105431	2.59501e-06	0.000211018	5.77899e-07	0.0200855	0.475712	0.0299766	1.33963e-06	6.04422e-07	4.67285e-06	5.40083e-05	3.6915e-06	1.14667e-06	8.10985e-06	0.00160837	0.0043657	1.70529e-07	3.5694e-08	0.417503	0.00364759	0.00633851
H26	3.04487e-05	0.000472471	0.00115322	0.00043765	7.52789e-06	3.14138e-06	2.81144e-05	3.65087e-07	1.69751e-05	1.25422e-07	0.00638021	0.0307561	0.484883	4.96718e-07	2.76956e-06	3.80309e-06	3.41136e-06	1.08013e-06	1.11169e-07	1.2918e-06	0.000843657	0.000405574	3.60553e-08	1.27591e-08	0.00364759	0.416086	0.0158711
H27	0.000731218	0.00022301	0.00105156	0.0108595	0.000179317	7.82909e-05	3.0674e-05	1.02592e-05	4.35721e-05	6.39184e-06	0.00567881	0.0285161	0.471577	4.98359e-06	3.99309e-05	5.53587e-05	2.13494e-05	1.26829e-06	1.25346e-06	6.77062e-06	0.000458155	0.00303301	3.97936e-07	6.36633e-07	0.00633851	0.0158711	0.377582
LDM — ajoene_e_14_LIDI_matrix
	S1	S2	S3	O4	C5	C6	C7	C8	C9	C10	C11	C12	C13	H14	H15	H16	H17	H18	H19	H20	H21	H22	H23	H24	H25	H26	H27
S1	12.9328	0.00278992	0.00134346	0.686244	0.464417	0.46629	0.0277674	0.0266324	0.0149846	0.0140436	0.000153848	0.000423071	0.000530943	0.0190438	0.0227001	0.0223777	0.0227584	0.0020411	0.00421562	0.000700447	8.89849e-05	1.22766e-05	0.000747663	0.000933427	0.000494387	4.072e-05	0.000773873		92.2795	31.7195	63.4391
S2	0.00278992	14.5373	0.651333	0.000718361	0.00937669	0.000440582	0.0629325	0.000111748	0.576906	0.000425647	0.0375541	0.00829601	0.00162595	0.00084233	0.002125	0.000545077	3.74823e-05	0.0109338	2.0268e-05	0.0277441	0.00824237	0.00607247	0.000572974	1.18112e-05	0.0079602	0.000346531	0.000155915
S3	0.00134346	0.651333	14.6408	0.000249153	0.00177214	0.00018619	0.0140642	0.000167953	0.0424968	0.000930768	0.528211	0.0393268	0.0221016	8.01511e-05	0.000216967	0.000232217	1.83961e-05	0.00115269	6.17833e-05	0.00870873	0.0260516	0.0303896	0.00361084	5.9596e-05	0.00211446	0.00104434	0.00141051
O4	0.686244	0.000718361	0.000249153	8.37021	0.0618201	0.0632874	0.014449	0.00949828	0.00288175	0.00524246	3.96119e-05	0.000138254	0.000108556	0.00823136	0.00353931	0.0054077	0.00550891	0.0111424	0.000750004	0.000445985	2.06025e-05	5.9572e-06	0.000272033	0.000602046	0.000418677	1.09451e-05	0.000189796
C5	0.464417	0.00937669	0.00177214	0.0618201	4.06704	0.0234967	0.516741	0.00732402	0.0364565	0.00432566	0.000128779	0.000103292	7.94597e-05	0.460196	0.463997	0.00304006	0.00472723	0.017268	0.000315748	0.00556939	4.78215e-05	8.77149e-06	0.000221586	0.000112447	0.000152702	5.44015e-06	5.27684e-05
C6	0.46629	0.000440582	0.00018619	0.0632874	0.0234967	4.07197	0.00773205	0.51953	0.00342696	0.0366519	0.000223031	0.0025953	0.00306949	0.00214077	0.00501708	0.448121	0.462924	0.000175686	0.0199077	0.000172876	5.00109e-05	9.57515e-06	0.00540549	0.00631376	0.00300668	0.000171197	0.00422755
C7	0.0277674	0.0629325	0.0140642	0.014449	0.516741	0.00773205	3.95523	0.000951157	0.876254	0.00102008	0.00171996	0.00174314	0.000804042	0.0174737	0.0194376	0.0094616	0.000698475	0.460913	0.000145779	0.0253171	0.000679785	0.000128031	0.00107719	5.4716e-05	0.00305511	9.12309e-05	6.30729e-05
C8	0.0266324	0.000111748	0.000167953	0.00949828	0.00732402	0.51953	0.000951157	3.9853	0.000912889	0.914873	4.50463e-05	0.000548727	0.00153063	0.00967891	0.000725622	0.016628	0.0189611	0.0001282	0.474483	0.00119477	4.43859e-06	6.24759e-06	0.0283067	0.0302735	0.000226989	4.72969e-05	0.00149863
C9	0.0149846	0.576906	0.0424968	0.00288175	0.0364565	0.00342696	0.876254	0.000912889	4.0933	0.00312958	0.00208272	0.0047937	0.00110315	0.00578856	0.0092841	0.00603923	0.000278798	0.0272197	0.00013557	0.461996	0.000413032	0.0003541	0.00427002	0.000161123	0.0051643	0.000120171	8.06204e-05
C10	0.0140436	0.000425647	0.000930768	0.00524246	0.00432566	0.0366519	0.00102008	0.914873	0.00312958	4.08251	0.00010041	0.00246205	0.00527345	0.00746716	0.000302551	0.00526633	0.0100353	0.000148297	0.0297554	0.00394746	4.97e-06	4.74685e-05	0.469537	0.483589	0.000106687	0.000119051	0.00157791
C11	0.000153848	0.0375541	0.528211	3.96119e-05	0.000128779	0.000223031	0.00171996	4.50463e-05	0.00208272	0.00010041	4.0119	0.516214	0.0366694	7.47236e-06	5.94566e-05	0.000492371	3.33269e-05	0.000121692	1.13133e-05	0.00030919	0.463535	0.464271	0.000278661	6.04333e-06	0.0187068	0.00626549	0.00624513
C12	0.000423071	0.00829601	0.0393268	0.000138254	0.000103292	0.0025953	0.00174314	0.000548727	0.0047937	0.00246205	0.516214	3.96881	0.914537	8.21324e-06	3.62453e-05	0.00698186	0.000136763	0.000132296	0.000169065	0.000216941	0.0182103	0.0193641	0.00576337	0.000180343	0.464247	0.0302159	0.0294812
C13	0.000530943	0.00162595	0.0221016	0.000108556	7.94597e-05	0.00306949	0.000804042	0.00153063	0.00110315	0.00527345	0.0366694	0.914537	4.0759	1.19698e-05	4.42553e-05	0.00540982	0.000435574	4.30294e-05	0.000154254	4.09544e-05	0.00650584	0.00841448	0.00828586	0.000263258	0.0281757	0.480966	0.478402
H14	0.0190438	0.00084233	8.01511e-05	0.00823136	0.460196	0.00214077	0.0174737	0.00967891	0.00578856	0.00746716	7.47236e-06	8.21324e-06	1.19698e-05	0.383563	0.014348	0.000112431	0.000251028	0.00460465	0.000318279	0.00361071	1.3641e-06	1.8227e-06	0.000296394	0.000177658	1.39139e-05	3.71333e-07	1.14958e-05
H15	0.0227001	0.002125	0.000216967	0.00353931	0.463997	0.00501708	0.0194376	0.000725622	0.0092841	0.000302551	5.94566e-05	3.62453e-05	4.42553e-05	0.014348	0.39075	0.000208085	0.000974827	0.00105118	1.87829e-05	0.00039254	2.02747e-05	3.62655e-06	2.85497e-05	6.89184e-06	4.55713e-05	3.49591e-06	2.83131e-05
H16	0.0223777	0.000545077	0.000232217	0.0054077	0.00304006	0.448121	0.0094616	0.016628	0.00603923	0.00526633	0.000492371	0.00698186	0.00540982	0.000112431	0.000208085	0.366221	0.0138997	0.000355191	0.00469805	0.000194259	0.000125905	3.20679e-05	0.00289736	0.000359219	0.0067581	0.000322223	0.00363599
H17	0.0227584	3.74823e-05	1.83961e-05	0.00550891	0.00472723	0.462924	0.000698475	0.0189611	0.000278798	0.0100353	3.33269e-05	0.000136763	0.000435574	0.000251028	0.000974827	0.0138997	0.390691	1.63581e-05	0.00129319	3.74431e-05	2.65833e-06	3.27297e-06	0.000440486	0.000793013	0.000120012	5.0462e-05	0.000929426
H18	0.0020411	0.0109338	0.00115269	0.0111424	0.017268	0.000175686	0.460913	0.0001282	0.0272197	0.000148297	0.000121692	0.000132296	4.30294e-05	0.00460465	0.00105118	0.000355191	1.63581e-05	0.370547	1.48463e-05	0.00580613	2.46497e-05	1.80849e-05	6.70624e-05	4.12551e-06	0.00041332	1.11833e-05	4.41227e-06
H19	0.00421562	2.0268e-05	6.17833e-05	0.000750004	0.000315748	0.0199077	0.000145779	0.474483	0.00013557	0.0297554	1.13133e-05	0.000169065	0.000154254	0.000318279	1.87829e-05	0.00469805	0.00129319	1.48463e-05	0.412166	7.92042e-05	2.22081e-06	1.6226e-06	0.00632451	0.00371782	0.000112497	3.10257e-06	5.16324e-05
H20	0.000700447	0.0277441	0.00870873	0.000445985	0.00556939	0.000172876	0.0253171	0.00119477	0.461996	0.00394746	0.00030919	0.000216941	4.09544e-05	0.00361071	0.00039254	0.000194259	3.74431e-05	0.00580613	7.92042e-05	0.377954	1.44613e-05	0.00016759	0.00362011	0.000128321	0.000106406	3.71019e-06	4.80989e-06
H21	8.89849e-05	0.00824237	0.0260516	2.06025e-05	4.78215e-05	5.00109e-05	0.000679785	4.43859e-06	0.000413032	4.97e-06	0.463535	0.0182103	0.00650584	1.3641e-06	2.02747e-05	0.000125905	2.65833e-06	2.46497e-05	2.22081e-06	1.44613e-05	0.39829	0.0145971	1.32117e-05	3.62769e-07	0.0047739	0.00411178	0.000457888
H22	1.22766e-05	0.00607247	0.0303896	5.9572e-06	8.77149e-06	9.57515e-06	0.000128031	6.24759e-06	0.0003541	4.74685e-05	0.464271	0.0193641	0.00841448	1.8227e-06	3.62655e-06	3.20679e-05	3.27297e-06	1.80849e-05	1.6226e-06	0.00016759	0.0145971	0.391046	0.000140769	3.39894e-06	0.00147039	0.000454778	0.000814737
H23	0.000747663	0.000572974	0.00361084	0.000272033	0.000221586	0.00540549	0.00107719	0.0283067	0.00427002	0.469537	0.000278661	0.00576337	0.00828586	0.000296394	2.85497e-05	0.00289736	0.000440486	6.70624e-05	0.00632451	0.00362011	1.32117e-05	0.000140769	0.383943	0.0157909	0.000253667	0.000268964	0.000650756
H24	0.000933427	1.18112e-05	5.9596e-05	0.000602046	0.000112447	0.00631376	5.4716e-05	0.0302735	0.000161123	0.483589	6.04333e-06	0.000180343	0.000263258	0.000177658	6.89184e-06	0.000359219	0.000793013	4.12551e-06	0.00371782	0.000128321	3.62769e-07	3.39894e-06	0.0157909	0.409468	4.96111e-06	3.17121e-06	4.03808e-05
H25	0.000494387	0.0079602	0.00211446	0.000418677	0.000152702	0.00300668	0.00305511	0.000226989	0.0051643	0.000106687	0.0187068	0.464247	0.0281757	1.39139e-05	4.55713e-05	0.0067581	0.000120012	0.00041332	0.000112497	0.000106406	0.0047739	0.00147039	0.000253667	4.96111e-06	0.394928	0.00657354	0.00349708
H26	4.072e-05	0.000346531	0.00104434	1.09451e-05	5.44015e-06	0.000171197	9.12309e-05	4.72969e-05	0.000120171	0.000119051	0.00626549	0.0302159	0.480966	3.71333e-07	3.49591e-06	0.000322223	5.0462e-05	1.11833e-05	3.10257e-06	3.71019e-06	0.00411178	0.000454778	0.000268964	3.17121e-06	0.00657354	0.413694	0.0164864
H27	0.000773873	0.000155915	0.00141051	0.000189796	5.27684e-05	0.00422755	6.30729e-05	0.00149863	8.06204e-05	0.00157791	0.00624513	0.0294812	0.478402	1.14958e-05	2.83131e-05	0.00363599	0.000929426	4.41227e-06	5.16324e-05	4.80989e-06	0.000457888	0.000814737	0.000650756	4.03808e-05	0.00349708	0.0164864	0.403216
LDM — ajoene_e_15_LIDI_matrix
	S1	S2	S3	O4	C5	C6	C7	C8	C9	C10	C11	C12	C13	H14	H15	H16	H17	H18	H19	H20	H21	H22	H23	H24	H25	H26	H27
S1	12.9454	0.00409427	0.00161525	0.679738	0.454415	0.467868	0.0293863	0.0313602	0.0208771	0.0168457	0.000718708	8.9003e-05	0.000530892	0.0207786	0.0223681	0.0238828	0.020372	0.00136259	0.00188714	0.000882626	7.57034e-05	0.00127558	0.000741075	0.000977509	4.71031e-05	6.11417e-05	0.00109492		92.2598	31.7399	63.4797
S2	0.00409427	14.5229	0.644106	0.00158994	0.00933622	0.000282361	0.0641635	6.57745e-05	0.582728	0.000125727	0.0361365	0.0184252	0.0114381	0.00166106	0.00108165	0.000371202	4.41746e-05	0.0114943	6.0402e-06	0.0269368	0.00891374	0.00247296	5.52644e-06	5.87717e-06	0.000942589	0.000350769	0.000482461
S3	0.00161525	0.644106	14.6533	0.0012476	0.00175704	8.89484e-05	0.0143851	2.71065e-05	0.0429693	3.94086e-05	0.527527	0.0384983	0.0213679	0.00010766	0.000174516	0.000129636	1.05335e-05	0.00138432	2.01029e-05	0.0119082	0.0278687	0.0272247	2.02725e-06	1.71125e-06	0.00677301	0.0016168	0.00110931
O4	0.679738	0.00158994	0.0012476	8.32627	0.0610031	0.0606085	0.0172027	0.0100705	0.0168768	0.00291639	0.00660849	0.000843543	0.00690159	0.00818692	0.00323166	0.00442744	0.0083727	0.00046387	0.00648963	0.00348765	0.000343794	0.0152575	0.000391733	0.000187743	0.000449011	0.000610949	0.0154066
C5	0.454415	0.00933622	0.00175704	0.0610031	4.05679	0.0238257	0.52299	0.00489104	0.0364233	0.00199189	0.000188318	3.34754e-05	7.47532e-05	0.468043	0.465041	0.0030393	0.00332517	0.018638	0.000210742	0.00565695	2.73457e-05	0.000157212	0.000108204	0.000239292	6.78636e-06	4.50813e-06	9.19078e-05
C6	0.467868	0.000282361	8.89484e-05	0.0606085	0.0238257	4.06794	0.00682315	0.516815	0.00150194	0.0382528	5.14442e-05	0.000269424	0.00181046	0.00378222	0.00465355	0.453834	0.46593	0.00328197	0.0187345	0.000172525	6.15078e-06	8.46555e-05	0.00636029	0.00639749	6.3559e-05	9.71185e-05	0.00385205
C7	0.0293863	0.0641635	0.0143851	0.0172027	0.52299	0.00682315	3.95145	0.000752159	0.865493	0.000352183	0.0018558	0.000680259	0.00150516	0.0182187	0.0185475	0.00866657	0.00038809	0.468437	3.74011e-05	0.023857	0.000269748	0.00114013	1.96003e-05	4.33041e-05	5.77302e-05	5.02001e-05	0.00122119
C8	0.0313602	6.57745e-05	2.71065e-05	0.0100705	0.00489104	0.516815	0.000752159	3.98111	0.000276445	0.922982	1.82184e-05	0.000169632	0.00123462	0.000404488	0.000976206	0.0181244	0.0179095	0.000368887	0.466874	2.60917e-05	2.44971e-06	1.07383e-05	0.0306686	0.0300922	4.27533e-05	0.000156322	0.00293128
C9	0.0208771	0.582728	0.0429693	0.0168768	0.0364233	0.00150194	0.865493	0.000276445	4.0772	0.000530303	0.00525018	0.00140754	0.00178464	0.00598877	0.00672682	0.00185597	0.000157668	0.0288403	1.18932e-05	0.459982	0.000545601	0.00422614	2.09491e-05	2.29574e-05	0.000152554	5.96827e-05	0.00107766
C10	0.0168457	0.000125727	3.94086e-05	0.00291639	0.00199189	0.0382528	0.000352183	0.922982	0.000530303	4.07924	7.93799e-06	2.74025e-05	0.000165532	7.45414e-05	0.000549777	0.00920073	0.00641693	0.000197485	0.028015	1.87934e-05	1.20908e-06	4.42803e-06	0.481712	0.482973	4.26832e-06	4.18661e-05	0.000393523
C11	0.000718708	0.0361365	0.527527	0.00660849	0.000188318	5.14442e-05	0.0018558	1.82184e-05	0.00525018	7.93799e-06	4.02793	0.516755	0.0372111	4.33475e-05	2.41331e-05	7.85722e-05	9.71986e-06	0.000113956	3.4991e-05	0.000752298	0.463942	0.450568	8.42689e-07	4.24119e-07	0.0199372	0.00629931	0.00591134
C12	8.9003e-05	0.0184252	0.0384983	0.000843543	3.34754e-05	0.000269424	0.000680259	0.000169632	0.00140754	2.74025e-05	0.516755	3.96467	0.91576	6.15471e-06	8.09091e-06	0.000852421	2.71155e-05	0.000191828	0.000481579	0.000193317	0.0192234	0.0170553	6.07821e-06	2.05734e-06	0.473756	0.0306105	0.0282834
C13	0.000530892	0.0114381	0.0213679	0.00690159	7.47532e-05	0.00181046	0.00150516	0.00123462	0.00178464	0.000165532	0.0372111	0.91576	4.08882	9.20538e-06	1.81653e-05	0.00419978	0.000125342	0.000454171	0.00261752	0.000103921	0.00964944	0.00571752	4.69733e-05	1.53391e-05	0.0290373	0.485347	0.464427
H14	0.0207786	0.00166106	0.00010766	0.00818692	0.468043	0.00378222	0.0182187	0.000404488	0.00598877	7.45414e-05	4.33475e-05	6.15471e-06	9.20538e-06	0.401652	0.0150534	0.000181151	0.00303414	0.00211926	0.000115391	0.000390581	3.36183e-06	3.23196e-05	1.39544e-05	8.06624e-06	8.64163e-07	6.0135e-07	1.4863e-05
H15	0.0223681	0.00108165	0.000174516	0.00323166	0.465041	0.00465355	0.0185475	0.000976206	0.00672682	0.000549777	2.41331e-05	8.09091e-06	1.81653e-05	0.0150534	0.391505	0.00020751	0.000279957	0.0041808	1.78253e-05	0.0031564	3.28088e-06	1.206e-05	2.62065e-05	6.39433e-05	9.11352e-07	4.47857e-07	1.27001e-05
H16	0.0238828	0.000371202	0.000129636	0.00442744	0.0030393	0.453834	0.00866657	0.0181244	0.00185597	0.00920073	7.85722e-05	0.000852421	0.00419978	0.000181151	0.00020751	0.375535	0.0142049	0.00568237	0.00116577	0.000121562	1.81875e-05	3.28835e-05	0.000448288	0.000722757	0.000113948	0.000250475	0.00543201
H17	0.020372	4.41746e-05	1.05335e-05	0.0083727	0.00332517	0.46593	0.00038809	0.0179095	0.000157668	0.00641693	9.71986e-06	2.71155e-05	0.000125342	0.00303414	0.000279957	0.0142049	0.403609	0.000178738	0.00499424	1.80727e-05	6.48246e-07	1.77314e-05	0.00409665	0.000472569	6.44519e-06	5.93629e-06	0.000312995
H18	0.00136259	0.0114943	0.00138432	0.00046387	0.018638	0.00328197	0.468437	0.000368887	0.0288403	0.000197485	0.000113956	0.000191828	0.000454171	0.00211926	0.0041808	0.00568237	0.000178738	0.40233	1.3541e-05	0.00597744	1.68787e-05	4.68943e-05	8.30034e-06	2.19948e-05	7.83632e-06	1.26142e-05	0.000164072
H19	0.00188714	6.0402e-06	2.01029e-05	0.00648963	0.000210742	0.0187345	3.74011e-05	0.466874	1.18932e-05	0.028015	3.4991e-05	0.000481579	0.00261752	0.000115391	1.78253e-05	0.00116577	0.00499424	1.3541e-05	0.388653	3.26152e-06	8.0031e-06	1.50314e-05	0.0064807	0.00354593	9.53575e-05	0.000175056	0.00391775
H20	0.000882626	0.0269368	0.0119082	0.00348765	0.00565695	0.000172525	0.023857	2.60917e-05	0.459982	1.87934e-05	0.000752298	0.000193317	0.000103921	0.000390581	0.0031564	0.000121562	1.80727e-05	0.00597744	3.26152e-06	0.370039	4.65767e-05	0.000839519	1.17475e-06	1.49466e-06	4.10746e-05	4.85135e-06	2.42809e-05
H21	7.57034e-05	0.00891374	0.0278687	0.000343794	2.73457e-05	6.15078e-06	0.000269748	2.44971e-06	0.000545601	1.20908e-06	0.463942	0.0192234	0.00964944	3.36183e-06	3.28088e-06	1.81875e-05	6.48246e-07	1.68787e-05	8.0031e-06	4.65767e-05	0.398694	0.0136065	8.89384e-08	6.38492e-08	0.00124266	0.000800856	0.000446553
H22	0.00127558	0.00247296	0.0272247	0.0152575	0.000157212	8.46555e-05	0.00114013	1.07383e-05	0.00422614	4.42803e-06	0.450568	0.0170553	0.00571752	3.23196e-05	1.206e-05	3.28835e-05	1.77314e-05	4.68943e-05	1.50314e-05	0.000839519	0.0136065	0.353675	4.85127e-07	2.30043e-07	0.00467831	0.000379555	0.00336341
H23	0.000741075	5.52644e-06	2.02725e-06	0.000391733	0.000108204	0.00636029	1.96003e-05	0.0306686	2.09491e-05	0.481712	8.42689e-07	6.07821e-06	4.69733e-05	1.39544e-05	2.62065e-05	0.000448288	0.00409665	8.30034e-06	0.0064807	1.17475e-06	8.89384e-08	4.85127e-07	0.41583	0.0168288	2.00285e-06	4.03178e-06	0.00010675
H24	0.000977509	5.87717e-06	1.71125e-06	0.000187743	0.000239292	0.00639749	4.33041e-05	0.0300922	2.29574e-05	0.482973	4.24119e-07	2.05734e-06	1.53391e-05	8.06624e-06	6.39433e-05	0.000722757	0.000472569	2.19948e-05	0.00354593	1.49466e-06	6.38492e-08	2.30043e-07	0.0168288	0.40643	5.39502e-07	2.02491e-06	2.66626e-05
H25	4.71031e-05	0.000942589	0.00677301	0.000449011	6.78636e-06	6.3559e-05	5.77302e-05	4.27533e-05	0.000152554	4.26832e-06	0.0199372	0.473756	0.0290373	8.64163e-07	9.11352e-07	0.000113948	6.44519e-06	7.83632e-06	9.53575e-05	4.10746e-05	0.00124266	0.00467831	2.00285e-06	5.39502e-07	0.414434	0.00355988	0.0060413
H26	6.11417e-05	0.000350769	0.0016168	0.000610949	4.50813e-06	9.71185e-05	5.02001e-05	0.000156322	5.96827e-05	4.18661e-05	0.00629931	0.0306105	0.485347	6.0135e-07	4.47857e-07	0.000250475	5.93629e-06	1.26142e-05	0.000175056	4.85135e-06	0.000800856	0.000379555	4.03178e-06	2.02491e-06	0.00355988	0.417797	0.0160498
H27	0.00109492	0.000482461	0.00110931	0.0154066	9.19078e-05	0.00385205	0.00122119	0.00293128	0.00107766	0.000393523	0.00591134	0.0282834	0.464427	1.4863e-05	1.27001e-05	0.00543201	0.000312995	0.000164072	0.00391775	2.42809e-05	0.000446553	0.00336341	0.00010675	2.66626e-05	0.0060413	0.0160498	0.376685
LDM — ajoene_e_16_LIDI_matrix
	S1	S2	S3	O4	C5	C6	C7	C8	C9	C10	C11	C12	C13	H14	H15	H16	H17	H18	H19	H20	H21	H22	H23	H24	H25	H26	H27
S1	12.9428	0.00367608	0.00108877	0.679234	0.457448	0.468786	0.0290963	0.03109	0.0196519	0.015816	0.000218329	0.000806873	0.000548919	0.0227755	0.0211108	0.0201572	0.0231759	0.00179091	0.00226304	0.00108533	6.98692e-05	3.72132e-05	0.000986032	0.000696175	0.00139089	5.2871e-05	0.000572591		92.2516	31.7485	63.4969
S2	0.00367608	14.5303	0.652907	0.00198392	0.00926955	0.000408783	0.0636035	6.39877e-05	0.579787	0.000166143	0.0374913	0.0151272	0.00775035	0.00122203	0.00135975	3.96385e-05	0.000576939	0.0110757	9.03695e-06	0.0262828	0.00865675	0.00316043	7.63026e-06	6.71538e-06	0.000818485	0.000539027	0.000261125
S3	0.00108877	0.652907	14.637	0.0011745	0.00168093	0.000190657	0.0125804	3.99197e-05	0.043204	4.06749e-05	0.529003	0.0350204	0.0180671	0.000185831	0.000130767	1.44894e-05	0.000286035	0.00127564	1.52858e-05	0.0119987	0.0278415	0.0299207	2.07574e-06	1.88069e-06	0.00530026	0.00123196	0.0015373
O4	0.679234	0.00198392	0.0011745	8.33083	0.0608809	0.0608623	0.0127815	0.010507	0.019407	0.00282635	0.000739321	0.0090231	0.000957872	0.00396578	0.00842351	0.00848773	0.00477501	0.000565212	0.00802993	0.00932352	4.37726e-05	0.000289518	0.000208184	0.00044024	0.0200092	0.000249661	0.000309061
C5	0.457448	0.00926955	0.00168093	0.0608809	4.06013	0.0239328	0.520608	0.00495834	0.0358848	0.00188081	0.00013543	0.000123397	0.000110102	0.464246	0.469534	0.00324863	0.00313857	0.0186937	0.000229861	0.00507306	3.68328e-05	1.0923e-05	0.000249788	0.000106002	0.000118323	6.58413e-06	3.75274e-05
C6	0.468786	0.000408783	0.000190657	0.0608623	0.0239328	4.0742	0.00963159	0.516716	0.00257915	0.0380265	0.000105534	0.0015781	0.00353786	0.00460561	0.00289928	0.466757	0.446132	0.00199349	0.018591	0.00019927	1.6401e-05	1.87884e-05	0.00639959	0.00631281	0.000704803	0.000177681	0.00427913
C7	0.0290963	0.0636035	0.0125804	0.0127815	0.520608	0.00963159	3.95913	0.000984211	0.867271	0.000446315	0.00170174	0.00227263	0.00152262	0.018694	0.0182565	0.000572102	0.0120643	0.470434	4.13076e-05	0.0229796	0.000480158	0.000140607	5.52999e-05	2.39711e-05	0.000992267	7.37873e-05	8.13551e-05
C8	0.03109	6.39877e-05	3.99197e-05	0.010507	0.00495834	0.516716	0.000984211	3.98097	0.000289723	0.920696	0.000127185	0.000550589	0.00373925	0.00102096	0.000311624	0.0180269	0.0174265	0.000259927	0.465193	2.20499e-05	1.26605e-05	1.71043e-05	0.030116	0.0306247	0.000529122	0.000324458	0.00924521
C9	0.0196519	0.579787	0.043204	0.019407	0.0358848	0.00257915	0.867271	0.000289723	4.07902	0.000690852	0.00216406	0.00655528	0.00226255	0.00717633	0.00477565	0.000177561	0.0039239	0.0292295	1.32041e-05	0.456175	0.000322193	0.000371676	3.1433e-05	2.64844e-05	0.00308572	0.000113677	8.27065e-05
C10	0.015816	0.000166143	4.06749e-05	0.00282635	0.00188081	0.0380265	0.000446315	0.920696	0.000690852	4.08096	6.0441e-05	0.000164008	0.000866402	0.000552621	6.39894e-05	0.00628808	0.00961267	0.000112523	0.027878	1.86282e-05	6.24357e-06	3.78613e-06	0.483147	0.48188	8.37578e-05	7.89721e-05	0.00275058
C11	0.000218329	0.0374913	0.529003	0.000739321	0.00013543	0.000105534	0.00170174	0.000127185	0.00216406	6.0441e-05	4.01359	0.515802	0.0385115	4.39355e-05	1.28523e-05	6.30803e-06	0.000246436	0.000107734	0.000103979	0.000308644	0.461659	0.464997	2.24183e-06	2.90074e-06	0.0175094	0.00688711	0.00623328
C12	0.000806873	0.0151272	0.0350204	0.0090231	0.000123397	0.0015781	0.00227263	0.000550589	0.00655528	0.000164008	0.515802	3.98194	0.915028	2.75065e-05	1.63963e-05	0.000119407	0.00415631	0.000175908	0.00100543	0.000280076	0.0193625	0.0187057	9.36767e-06	2.07865e-05	0.454403	0.0303537	0.0296939
C13	0.000548919	0.00775035	0.0180671	0.000957872	0.000110102	0.00353786	0.00152262	0.00373925	0.00226255	0.000866402	0.0385115	0.915028	4.08833	2.76889e-05	1.12634e-05	0.000182665	0.00841241	0.000204205	0.00233249	6.95691e-05	0.0108456	0.00731417	3.40293e-05	5.85406e-05	0.0259695	0.481252	0.475015
H14	0.0227755	0.00122203	0.000185831	0.00396578	0.464246	0.00460561	0.018694	0.00102096	0.00717633	0.000552621	4.39355e-05	2.75065e-05	2.76889e-05	0.38819	0.0151886	0.000300277	0.000206527	0.00323193	1.84615e-05	0.00195719	9.60795e-06	4.58143e-06	6.7395e-05	2.61639e-05	1.49912e-05	1.87037e-06	5.3176e-06
H15	0.0211108	0.00135975	0.000130767	0.00842351	0.469534	0.00289928	0.0182565	0.000311624	0.00477565	6.39894e-05	1.28523e-05	1.63963e-05	1.12634e-05	0.0151886	0.403224	0.00240542	0.000138309	0.00267894	0.000100107	0.000350769	1.90656e-06	1.60513e-06	7.11074e-06	1.15985e-05	2.42518e-05	9.53792e-07	3.15119e-06
H16	0.0201572	3.96385e-05	1.44894e-05	0.00848773	0.00324863	0.466757	0.000572102	0.0180269	0.000177561	0.00628808	6.30803e-06	0.000119407	0.000182665	0.000300277	0.00240542	0.405635	0.0137449	0.000262378	0.00503425	2.80515e-05	1.45884e-06	9.01901e-07	0.000464894	0.00403063	5.73771e-05	8.41256e-06	0.000197224
H17	0.0231759	0.000576939	0.000286035	0.00477501	0.00313857	0.446132	0.0120643	0.0174265	0.0039239	0.00961267	0.000246436	0.00415631	0.00841241	0.000206527	0.000138309	0.0137449	0.358314	0.00309715	0.000961257	0.000108793	6.42602e-05	2.85911e-05	0.000697774	0.000444508	0.000890389	0.000347284	0.00577094
H18	0.00179091	0.0110757	0.00127564	0.000565212	0.0186937	0.00199349	0.470434	0.000259927	0.0292295	0.000112523	0.000107734	0.000175908	0.000204205	0.00323193	0.00267894	0.000262378	0.00309715	0.403718	1.55984e-05	0.00590901	1.92467e-05	1.52744e-05	1.19338e-05	5.89484e-06	3.67943e-05	5.82156e-06	1.72573e-05
H19	0.00226304	9.03695e-06	1.52858e-05	0.00802993	0.000229861	0.018591	4.13076e-05	0.465193	1.32041e-05	0.027878	0.000103979	0.00100543	0.00233249	1.84615e-05	0.000100107	0.00503425	0.000961257	1.55984e-05	0.385905	6.59068e-06	1.81302e-05	3.40039e-05	0.00354832	0.00647299	0.000834459	0.000209583	0.00388951
H20	0.00108533	0.0262828	0.0119987	0.00932352	0.00507306	0.00019927	0.0229796	2.20499e-05	0.456175	1.86282e-05	0.000308644	0.000280076	6.95691e-05	0.00195719	0.000350769	2.80515e-05	0.000108793	0.00590901	6.59068e-06	0.355557	2.1659e-05	0.000162264	1.21955e-06	1.26442e-06	0.000391714	1.68181e-05	5.53587e-06
H21	6.98692e-05	0.00865675	0.0278415	4.37726e-05	3.68328e-05	1.6401e-05	0.000480158	1.26605e-05	0.000322193	6.24357e-06	0.461659	0.0193625	0.0108456	9.60795e-06	1.90656e-06	1.45884e-06	6.42602e-05	1.92467e-05	1.81302e-05	2.1659e-05	0.393872	0.014856	2.15086e-07	3.2302e-07	0.000849053	0.000514458	0.000762805
H22	3.72132e-05	0.00316043	0.0299207	0.000289518	1.0923e-05	1.87884e-05	0.000140607	1.71043e-05	0.000371676	3.78613e-06	0.464997	0.0187057	0.00731417	4.58143e-06	1.60513e-06	9.01901e-07	2.85911e-05	1.52744e-05	3.40039e-05	0.000162264	0.014856	0.400995	1.72019e-07	6.21131e-07	0.00459135	0.00509079	0.000502251
H23	0.000986032	7.63026e-06	2.07574e-06	0.000208184	0.000249788	0.00639959	5.52999e-05	0.030116	3.1433e-05	0.483147	2.24183e-06	9.36767e-06	3.40293e-05	6.7395e-05	7.11074e-06	0.000464894	0.000697774	1.19338e-05	0.00354832	1.21955e-06	2.15086e-07	1.72019e-07	0.40682	0.0168639	6.3072e-06	3.12004e-06	8.79233e-05
H24	0.000696175	6.71538e-06	1.88069e-06	0.00044024	0.000106002	0.00631281	2.39711e-05	0.0306247	2.64844e-05	0.48188	2.90074e-06	2.07865e-05	5.85406e-05	2.61639e-05	1.15985e-05	0.00403063	0.000444508	5.89484e-06	0.00647299	1.26442e-06	3.2302e-07	6.21131e-07	0.0168639	0.415842	2.75859e-05	5.63801e-06	0.000132593
H25	0.00139089	0.000818485	0.00530026	0.0200092	0.000118323	0.000704803	0.000992267	0.000529122	0.00308572	8.37578e-05	0.0175094	0.454403	0.0259695	1.49912e-05	2.42518e-05	5.73771e-05	0.000890389	3.67943e-05	0.000834459	0.000391714	0.000849053	0.00459135	6.3072e-06	2.75859e-05	0.354885	0.00618166	0.00319959
H26	5.2871e-05	0.000539027	0.00123196	0.000249661	6.58413e-06	0.000177681	7.37873e-05	0.000324458	0.000113677	7.89721e-05	0.00688711	0.0303537	0.481252	1.87037e-06	9.53792e-07	8.41256e-06	0.000347284	5.82156e-06	0.000209583	1.68181e-05	0.000514458	0.00509079	3.12004e-06	5.63801e-06	0.00618166	0.416877	0.0163459
H27	0.000572591	0.000261125	0.0015373	0.000309061	3.75274e-05	0.00427913	8.13551e-05	0.00924521	8.27065e-05	0.00275058	0.00623328	0.0296939	0.475015	5.3176e-06	3.15119e-06	0.000197224	0.00577094	1.72573e-05	0.00388951	5.53587e-06	0.000762805	0.000502251	8.79233e-05	0.000132593	0.00319959	0.0163459	0.402549
LDM — ajoene_e_17_LIDI_matrix
	S1	S2	S3	O4	C5	C6	C7	C8	C9	C10	C11	C12	C13	H14	H15	H16	H17	H18	H19	H20	H21	H22	H23	H24	H25	H26	H27
S1	12.9224	0.00341886	0.000896743	0.685591	0.463587	0.463124	0.0278344	0.028853	0.0146189	0.0195978	0.000181024	0.000420155	0.000932413	0.0229634	0.0191308	0.0223462	0.0228768	0.00243021	0.00126279	0.000680671	7.99419e-05	1.47738e-05	0.00129613	0.000897071	4.08046e-05	5.36129e-05	0.00080994		92.2629	31.738	63.476
S2	0.00341886	14.5207	0.656307	0.00084624	0.00947369	0.000517813	0.0655893	0.000188619	0.577991	4.86136e-05	0.0386756	0.00910025	0.00587621	0.00225799	0.000825779	4.10984e-05	0.000606567	0.00987743	0.000541793	0.0271219	0.00834095	0.00687175	1.40785e-05	7.36366e-06	0.000506712	0.00147235	0.000225107
S3	0.000896743	0.656307	14.6331	0.00019841	0.00173487	0.000220775	0.0107923	0.000142738	0.0412351	3.35922e-05	0.528857	0.0393105	0.0203319	0.000167351	9.9649e-05	1.25034e-05	0.000300765	0.00118888	0.000329492	0.0129523	0.0272476	0.029005	7.16298e-06	4.26486e-06	0.0066573	0.00125368	0.00140163
O4	0.685591	0.00084624	0.00019841	8.37065	0.0624356	0.0631503	0.0119552	0.010151	0.00288846	0.00653786	3.4615e-05	9.18101e-05	0.000207064	0.00471162	0.00848248	0.00405321	0.00711587	0.0110096	0.00053159	0.00052601	1.57646e-05	4.44588e-06	0.000433142	0.000528188	1.53456e-05	2.55823e-05	0.000212174
C5	0.463587	0.00947369	0.00173487	0.0624356	4.06192	0.0230524	0.517215	0.00787243	0.0366782	0.0022233	0.00013589	8.1032e-05	0.000126939	0.462365	0.463025	0.00504146	0.00231972	0.0174427	0.00300695	0.00577396	4.89034e-05	1.09016e-05	0.000146703	7.12811e-05	1.24695e-05	9.05259e-06	4.40481e-05
C6	0.463124	0.000517813	0.000220775	0.0631503	0.0230524	4.07215	0.0100323	0.518696	0.00365276	0.0370613	0.000124452	0.00139571	0.00534661	0.00492807	0.00136069	0.465155	0.450928	0.000532136	0.0186701	0.000247012	2.36649e-05	6.08202e-06	0.00601504	0.00636359	0.000204177	0.000206884	0.00445287
C7	0.0278344	0.0655893	0.0107923	0.0119552	0.517215	0.0100323	3.95665	0.00255495	0.876483	0.000532698	0.00180255	0.00113645	0.00167144	0.0190065	0.0177432	0.000884823	0.00991308	0.461291	0.00316862	0.0250539	0.000562189	0.000170185	0.000105846	4.01288e-05	5.93035e-05	0.000100028	7.29497e-05
C8	0.028853	0.000188619	0.000142738	0.010151	0.00787243	0.518696	0.00255495	3.97381	0.00285796	0.913832	0.000175943	0.00271577	0.00596204	0.000735305	0.00776765	0.0183847	0.016949	0.000162026	0.463886	0.00131522	2.00444e-05	4.29494e-05	0.0298984	0.0300031	0.00190523	0.000362967	0.0076904
C9	0.0146189	0.577991	0.0412351	0.00288846	0.0366782	0.00365276	0.876483	0.00285796	4.09557	0.00033489	0.0020958	0.00548774	0.00390597	0.00951539	0.0058605	0.000272413	0.00471303	0.0275374	0.00633869	0.462336	0.000461292	0.000303329	0.000139024	4.68348e-05	0.00049431	0.000154118	0.000107282
C10	0.0195978	4.86136e-05	3.35922e-05	0.00653786	0.0022233	0.0370613	0.000532698	0.913832	0.00033489	4.08463	3.36368e-05	0.000462232	0.0014611	0.000116886	0.0026332	0.00691863	0.00687145	8.31e-05	0.0284766	0.000150907	4.37843e-06	1.50405e-05	0.481013	0.483623	0.000547156	0.000162655	0.0030486
C11	0.000181024	0.0386756	0.528857	3.4615e-05	0.00013589	0.000124452	0.00180255	0.000175943	0.0020958	3.36368e-05	4.01315	0.517229	0.0366369	6.88888e-05	5.49611e-06	1.11263e-05	0.000150234	8.29121e-05	0.000274751	0.000333308	0.462742	0.463013	3.27524e-06	4.8396e-06	0.0197826	0.00628782	0.00609756
C12	0.000420155	0.00910025	0.0393105	9.18101e-05	8.1032e-05	0.00139571	0.00113645	0.00271577	0.00548774	0.000462232	0.517229	3.96841	0.912039	3.77172e-05	1.05512e-05	6.00579e-05	0.00276424	4.10814e-05	0.00452697	0.000780476	0.019544	0.0183386	6.7715e-05	4.32993e-05	0.471388	0.0298698	0.0291491
C13	0.000932413	0.00587621	0.0203319	0.000207064	0.000126939	0.00534661	0.00167144	0.00596204	0.00390597	0.0014611	0.0366369	0.912039	4.0745	6.70078e-05	1.06569e-05	0.000244106	0.00853347	6.55315e-05	0.0029889	0.000200087	0.00973776	0.0063096	7.90896e-05	5.46226e-05	0.0288579	0.47968	0.475277
H14	0.0229634	0.00225799	0.000167351	0.00471162	0.462365	0.00492807	0.0190065	0.000735305	0.00951539	0.000116886	6.88888e-05	3.77172e-05	6.70078e-05	0.387737	0.0144784	0.000956871	0.000176629	0.000890844	0.000246486	0.000383611	1.42534e-05	5.54598e-06	1.09697e-05	4.4483e-06	4.52052e-06	4.35608e-06	2.56936e-05
H15	0.0191308	0.000825779	9.9649e-05	0.00848248	0.463025	0.00136069	0.0177432	0.00776765	0.0058605	0.0026332	5.49611e-06	1.05512e-05	1.06569e-05	0.0144784	0.394066	0.000176842	0.000127539	0.00475757	0.00358697	0.00363557	1.00723e-06	1.76416e-06	0.000117663	8.75073e-05	5.89539e-06	1.09463e-06	1.30213e-05
H16	0.0223462	4.10984e-05	1.25034e-05	0.00405321	0.00504146	0.465155	0.000884823	0.0183847	0.000272413	0.00691863	1.11263e-05	6.00579e-05	0.000244106	0.000956871	0.000176842	0.394939	0.0140866	3.55384e-05	0.00424892	5.4805e-05	1.5707e-06	7.3121e-07	0.00311767	0.000458408	3.90789e-05	1.25843e-05	0.000348564
H17	0.0228768	0.000606567	0.000300765	0.00711587	0.00231972	0.450928	0.00991308	0.016949	0.00471303	0.00687145	0.000150234	0.00276424	0.00853347	0.000176629	0.000127539	0.0140866	0.364771	0.00115405	0.00203846	0.000120177	6.07375e-05	7.03005e-06	0.000430232	0.000784263	0.000106963	0.000586972	0.00315119
H18	0.00243021	0.00987743	0.00118888	0.0110096	0.0174427	0.000532136	0.461291	0.000162026	0.0275374	8.31e-05	8.29121e-05	4.10814e-05	6.55315e-05	0.000890844	0.00475757	3.55384e-05	0.00115405	0.374095	0.000135593	0.00589263	2.18503e-05	1.85711e-05	5.3906e-06	5.43934e-06	1.10275e-05	8.71225e-06	3.48765e-06
H19	0.00126279	0.000541793	0.000329492	0.00053159	0.00300695	0.0186701	0.00316862	0.463886	0.00633869	0.0284766	0.000274751	0.00452697	0.0029889	0.000246486	0.00358697	0.00424892	0.00203846	0.000135593	0.397885	0.00307851	2.79439e-05	8.15449e-05	0.00645403	0.00361213	0.00288676	0.000115623	0.000802268
H20	0.000680671	0.0271219	0.0129523	0.00052601	0.00577396	0.000247012	0.0250539	0.00131522	0.462336	0.000150907	0.000333308	0.000780476	0.000200087	0.000383611	0.00363557	5.4805e-05	0.000120177	0.00589263	0.00307851	0.379822	2.08264e-05	0.000183632	6.97787e-05	2.04211e-05	0.0003305	2.11954e-05	1.23684e-05
H21	7.99419e-05	0.00834095	0.0272476	1.57646e-05	4.89034e-05	2.36649e-05	0.000562189	2.00444e-05	0.000461292	4.37843e-06	0.462742	0.019544	0.00973776	1.42534e-05	1.00723e-06	1.5707e-06	6.07375e-05	2.18503e-05	2.79439e-05	2.08264e-05	0.395193	0.0144534	3.30886e-07	3.73382e-07	0.00132594	0.00048614	0.000784495
H22	1.47738e-05	0.00687175	0.029005	4.44588e-06	1.09016e-05	6.08202e-06	0.000170185	4.29494e-05	0.000303329	1.50405e-05	0.463013	0.0183386	0.0063096	5.54598e-06	1.76416e-06	7.3121e-07	7.03005e-06	1.85711e-05	8.15449e-05	0.000183632	0.0144534	0.391382	9.98337e-07	2.08497e-06	0.00514015	0.00421077	0.000441507
H23	0.00129613	1.40785e-05	7.16298e-06	0.000433142	0.000146703	0.00601504	0.000105846	0.0298984	0.000139024	0.481013	3.27524e-06	6.7715e-05	7.90896e-05	1.09697e-05	0.000117663	0.00311767	0.000430232	5.3906e-06	0.00645403	6.97787e-05	3.30886e-07	9.98337e-07	0.409596	0.016751	5.17821e-05	5.83795e-06	8.42827e-05
H24	0.000897071	7.36366e-06	4.26486e-06	0.000528188	7.12811e-05	0.00636359	4.01288e-05	0.0300031	4.68348e-05	0.483623	4.8396e-06	4.32993e-05	5.46226e-05	4.4483e-06	8.75073e-05	0.000458408	0.000784263	5.43934e-06	0.00361213	2.04211e-05	3.73382e-07	2.08497e-06	0.016751	0.408601	5.29308e-05	7.46286e-06	8.0856e-05
H25	4.08046e-05	0.000506712	0.0066573	1.53456e-05	1.24695e-05	0.000204177	5.93035e-05	0.00190523	0.00049431	0.000547156	0.0197826	0.471388	0.0288579	4.52052e-06	5.89539e-06	3.90789e-05	0.000106963	1.10275e-05	0.00288676	0.0003305	0.00132594	0.00514015	5.17821e-05	5.29308e-05	0.412044	0.00674933	0.00356896
H26	5.36129e-05	0.00147235	0.00125368	2.55823e-05	9.05259e-06	0.000206884	0.000100028	0.000362967	0.000154118	0.000162655	0.00628782	0.0298698	0.47968	4.35608e-06	1.09463e-06	1.25843e-05	0.000586972	8.71225e-06	0.000115623	2.11954e-05	0.00048614	0.00421077	5.83795e-06	7.46286e-06	0.00674933	0.40817	0.0162047
H27	0.00080994	0.000225107	0.00140163	0.000212174	4.40481e-05	0.00445287	7.29497e-05	0.0076904	0.000107282	0.0030486	0.00609756	0.0291491	0.475277	2.56936e-05	1.30213e-05	0.000348564	0.00315119	3.48765e-06	0.000802268	1.23684e-05	0.000784495	0.000441507	8.42827e-05	8.0856e-05	0.00356896	0.0162047	0.396923
LDM — ajoene_e_18_LIDI_matrix
	S1	S2	S3	O4	C5	C6	C7	C8	C9	C10	C11	C12	C13	H14	H15	H16	H17	H18	H19	H20	H21	H22	H23	H24	H25	H26	H27
S1	12.9458	0.00305669	0.00229412	0.681467	0.457121	0.467723	0.0303294	0.0265182	0.0212691	0.0140161	0.00099753	0.000537907	0.000249976	0.0227664	0.0203372	0.0226628	0.0229169	0.00140456	0.00429861	0.000947564	0.00181284	7.11983e-05	0.000767047	0.000958853	0.000156163	8.05004e-06	9.36944e-06		92.2802	31.7207	63.4415
S2	0.00305669	14.5591	0.636975	0.00157698	0.00922214	0.000286371	0.0607093	6.12561e-05	0.57741	0.000101628	0.0351986	0.0122073	0.00181774	0.00107936	0.00142318	0.000364226	3.41901e-05	0.013446	1.47972e-05	0.0272694	0.0028058	0.00870772	0.000160869	6.10005e-06	0.0176808	0.000561274	0.000231701
S3	0.00229412	0.636975	14.6482	0.00236642	0.00182171	0.000328767	0.0185767	3.30668e-05	0.0433627	1.72745e-05	0.532128	0.0398647	0.0187822	0.000255537	9.57555e-05	0.000498	4.23761e-05	0.00145841	1.12214e-05	0.00815796	0.0268522	0.0264635	2.90379e-05	1.98936e-06	0.00393159	0.000872413	0.00159447
O4	0.681467	0.00157698	0.00236642	8.32973	0.0611862	0.0617394	0.0142982	0.00930948	0.0175505	0.00518609	0.0106787	0.000827242	0.000559268	0.00412715	0.00818431	0.0052098	0.00471877	0.000498467	0.000729102	0.00608329	0.0248373	0.000425685	0.000288762	0.000584471	5.28444e-05	2.52496e-05	4.36181e-05
C5	0.457121	0.00922214	0.00182171	0.0611862	4.06503	0.0222867	0.522372	0.00781499	0.0351484	0.00409828	0.000219376	4.78e-05	1.52602e-05	0.464346	0.463995	0.00225598	0.00492856	0.0182184	0.000366646	0.00486334	0.000227943	2.02593e-05	0.000279362	0.000107414	6.85792e-05	1.06742e-06	1.01152e-06
C6	0.467723	0.000286371	0.000328767	0.0617394	0.0222867	4.07193	0.00883631	0.519972	0.00220264	0.0370132	0.000874297	0.00317731	0.00106398	0.00479493	0.00145723	0.450707	0.462243	0.00209946	0.0197386	0.000164502	0.00178211	3.64475e-05	0.00595128	0.00628231	0.000932599	4.00774e-05	3.17664e-05
C7	0.0303294	0.0607093	0.0185767	0.0142982	0.522372	0.00883631	3.95302	0.0017826	0.866922	0.00250686	0.00252068	0.00065451	0.000144762	0.0184817	0.0178018	0.00866736	0.000743817	0.464397	0.000168253	0.0238025	0.00301987	0.000270278	0.00204118	8.20429e-05	0.00101261	2.18075e-05	1.03537e-05
C8	0.0265182	6.12561e-05	3.30668e-05	0.00930948	0.00781499	0.519972	0.0017826	3.98193	0.000320542	0.916335	8.21227e-05	0.000232277	7.54057e-05	0.000834232	0.00846801	0.0165934	0.0189059	0.00201687	0.47367	6.29378e-05	0.000171981	4.20907e-06	0.0299259	0.029901	9.01227e-05	2.45758e-06	4.52919e-06
C9	0.0212691	0.57741	0.0433627	0.0175505	0.0351484	0.00220264	0.866922	0.000320542	4.07847	0.000335311	0.00709474	0.0010621	0.000240766	0.00644408	0.00521354	0.00281748	0.000192231	0.0283242	8.1616e-05	0.46029	0.00673853	0.000704151	0.000281085	1.99702e-05	0.0011036	4.70525e-05	2.75723e-05
C10	0.0140161	0.000101628	1.72745e-05	0.00518609	0.00409828	0.0370132	0.00250686	0.916335	0.000335311	4.07713	2.69102e-05	9.68103e-05	4.46939e-05	0.000255081	0.00564171	0.00559835	0.0100685	0.00530701	0.0296724	0.000105234	3.82627e-05	3.08689e-06	0.478177	0.482751	0.000249497	2.0056e-06	8.55089e-06
C11	0.00099753	0.0351986	0.532128	0.0106787	0.000219376	0.000874297	0.00252068	8.21227e-05	0.00709474	2.69102e-05	4.03884	0.516573	0.0369752	3.58314e-05	3.661e-05	0.00231242	6.32364e-05	0.000179835	3.62087e-05	0.000388184	0.438634	0.463801	4.81785e-05	1.64347e-06	0.0187766	0.00620254	0.00634534
C12	0.000537907	0.0122073	0.0398647	0.000827242	4.78e-05	0.00317731	0.00065451	0.000232277	0.0010621	9.68103e-05	0.516573	3.97094	0.921108	9.78885e-06	5.67626e-06	0.00774217	0.000288286	0.00036524	0.000114266	0.000150609	0.0175646	0.0182783	0.000333352	7.16976e-06	0.465452	0.0305182	0.030655
C13	0.000249976	0.00181774	0.0187822	0.000559268	1.52602e-05	0.00106398	0.000144762	7.54057e-05	0.000240766	4.46939e-05	0.0369752	0.921108	4.08595	4.63332e-06	2.01863e-06	0.00310391	0.000210927	7.04636e-05	4.02506e-05	4.65877e-05	0.00939178	0.00639383	0.000109766	3.52496e-06	0.029126	0.481953	0.484512
H14	0.0227664	0.00107936	0.000255537	0.00412715	0.464346	0.00479493	0.0184817	0.000834232	0.00644408	0.000255081	3.58314e-05	9.78885e-06	4.63332e-06	0.387793	0.0144775	0.000174678	0.000924908	0.00369961	2.33911e-05	0.00224883	2.29108e-05	4.00707e-06	4.89325e-05	5.50343e-06	2.29486e-05	2.25991e-07	2.55196e-07
H15	0.0203372	0.00142318	9.57555e-05	0.00818431	0.463995	0.00145723	0.0178018	0.00846801	0.00521354	0.00564171	3.661e-05	5.67626e-06	2.01863e-06	0.0144775	0.386835	0.000105334	0.000178549	0.00238616	0.000455004	0.000322743	3.94089e-05	2.78336e-06	0.000168785	0.000142489	5.34313e-06	1.89326e-07	1.52811e-07
H16	0.0226628	0.000364226	0.000498	0.0052098	0.00225598	0.450707	0.00866736	0.0165934	0.00281748	0.00559835	0.00231242	0.00774217	0.00310391	0.000174678	0.000105334	0.367917	0.0139048	0.00281152	0.00476497	8.19525e-05	0.00269652	0.000141457	0.00337254	0.000395284	0.00255474	0.000121585	0.000100334
H17	0.0229169	3.41901e-05	4.23761e-05	0.00471877	0.00492856	0.462243	0.000743817	0.0189059	0.000192231	0.0100685	6.32364e-05	0.000288286	0.000210927	0.000924908	0.000178549	0.0139048	0.385875	0.000197404	0.00123832	1.12061e-05	0.000117133	2.74099e-06	0.000487923	0.000774727	6.05949e-05	7.72242e-06	5.55878e-06
H18	0.00140456	0.013446	0.00145841	0.000498467	0.0182184	0.00209946	0.464397	0.00201687	0.0283242	0.00530701	0.000179835	0.00036524	7.04636e-05	0.00369961	0.00238616	0.00281152	0.000197404	0.395341	0.000137748	0.00582544	9.41117e-05	2.33678e-05	0.00428601	0.000261442	0.000787156	2.04146e-05	5.52336e-06
H19	0.00429861	1.47972e-05	1.12214e-05	0.000729102	0.000366646	0.0197386	0.000168253	0.47367	8.1616e-05	0.0296724	3.62087e-05	0.000114266	4.02506e-05	2.33911e-05	0.000455004	0.00476497	0.00123832	0.000137748	0.409181	6.66219e-06	6.44218e-05	1.3881e-06	0.00667623	0.0036675	7.21694e-05	1.95037e-06	2.07165e-06
H20	0.000947564	0.0272694	0.00815796	0.00608329	0.00486334	0.000164502	0.0238025	6.29378e-05	0.46029	0.000105234	0.000388184	0.000150609	4.65877e-05	0.00224883	0.000322743	8.19525e-05	1.12061e-05	0.00582544	6.66219e-06	0.365238	0.000426766	1.88274e-05	0.000100867	3.97188e-06	0.000166895	7.09879e-06	7.6939e-06
H21	0.00181284	0.0028058	0.0268522	0.0248373	0.000227943	0.00178211	0.00301987	0.000171981	0.00673853	3.82627e-05	0.438634	0.0175646	0.00939178	2.29108e-05	3.94089e-05	0.00269652	0.000117133	9.41117e-05	6.44218e-05	0.000426766	0.332802	0.0130822	1.36609e-05	2.47574e-06	0.000728483	0.000409388	0.000670756
H22	7.11983e-05	0.00870772	0.0264635	0.000425685	2.02593e-05	3.64475e-05	0.000270278	4.20907e-06	0.000704151	3.08689e-06	0.463801	0.0182783	0.00639383	4.00707e-06	2.78336e-06	0.000141457	2.74099e-06	2.33678e-05	1.3881e-06	1.88274e-05	0.0130822	0.397511	1.74034e-05	2.31041e-07	0.00503133	0.00403235	0.000483569
H23	0.000767047	0.000160869	2.90379e-05	0.000288762	0.000279362	0.00595128	0.00204118	0.0299259	0.000281085	0.478177	4.81785e-05	0.000333352	0.000109766	4.89325e-05	0.000168785	0.00337254	0.000487923	0.00428601	0.00667623	0.000100867	1.36609e-05	1.74034e-05	0.407378	0.0164628	0.000475635	1.28057e-05	1.32392e-05
H24	0.000958853	6.10005e-06	1.98936e-06	0.000584471	0.000107414	0.00628231	8.20429e-05	0.029901	1.99702e-05	0.482751	1.64347e-06	7.16976e-06	3.52496e-06	5.50343e-06	0.000142489	0.000395284	0.000774727	0.000261442	0.0036675	3.97188e-06	2.47574e-06	2.31041e-07	0.0164628	0.405424	3.31074e-05	1.41924e-07	8.56813e-07
H25	0.000156163	0.0176808	0.00393159	5.28444e-05	6.85792e-05	0.000932599	0.00101261	9.01227e-05	0.0011036	0.000249497	0.0187766	0.465452	0.029126	2.29486e-05	5.34313e-06	0.00255474	6.05949e-05	0.000787156	7.21694e-05	0.000166895	0.000728483	0.00503133	0.000475635	3.31074e-05	0.402285	0.00652773	0.0036697
H26	8.05004e-06	0.000561274	0.000872413	2.52496e-05	1.06742e-06	4.00774e-05	2.18075e-05	2.45758e-06	4.70525e-05	2.0056e-06	0.00620254	0.0305182	0.481953	2.25991e-07	1.89326e-07	0.000121585	7.72242e-06	2.04146e-05	1.95037e-06	7.09879e-06	0.000409388	0.00403235	1.28057e-05	1.41924e-07	0.00652773	0.41603	0.0171211
H27	9.36944e-06	0.000231701	0.00159447	4.36181e-05	1.01152e-06	3.17664e-05	1.03537e-05	4.52919e-06	2.75723e-05	8.55089e-06	0.00634534	0.030655	0.484512	2.55196e-07	1.52811e-07	0.000100334	5.55878e-06	5.52336e-06	2.07165e-06	7.6939e-06	0.000670756	0.000483569	1.32392e-05	8.56813e-07	0.0036697	0.0171211	0.414462
LDM — ajoene_e_19_LIDI_matrix
	S1	S2	S3	O4	C5	C6	C7	C8	C9	C10	C11	C12	C13	H14	H15	H16	H17	H18	H19	H20	H21	H22	H23	H24	H25	H26	H27
S1	12.932	0.00258429	0.000802537	0.6868	0.464601	0.465938	0.0277424	0.0277811	0.0131395	0.0160309	0.000140704	0.000213802	0.000275009	0.0233803	0.0223199	0.0190784	0.0232281	0.00376447	0.00231452	0.000798538	1.23084e-05	6.37022e-05	0.00133842	0.000680253	0.000328477	0.000426775	2.53977e-05		92.2735	31.7272	63.4545
S2	0.00258429	14.5315	0.652627	0.00113176	0.0094082	0.000410652	0.0646603	0.000214087	0.579266	0.000578363	0.0377405	0.00799926	0.00158948	0.000798448	0.00213536	0.000491445	3.14357e-05	0.011343	1.52243e-05	0.0265657	0.00637851	0.0082115	1.17017e-05	0.000452724	0.00775697	0.000160393	0.000344355
S3	0.000802537	0.652627	14.6309	0.000562577	0.00173838	0.000168322	0.0127695	0.000176232	0.0420716	0.000902006	0.528154	0.0397877	0.0220317	8.63109e-05	0.00016784	0.000196635	1.26907e-05	0.00125552	5.05425e-05	0.00990241	0.0302391	0.0259038	5.62918e-05	0.00332769	0.00222159	0.00142079	0.00102276
O4	0.6868	0.00113176	0.000562577	8.37088	0.0630606	0.0615519	0.00947172	0.0128791	0.00493325	0.00302382	6.44003e-05	0.000175514	0.000208326	0.00517108	0.00562366	0.00789353	0.00389108	0.000704846	0.0113179	0.000287422	5.17084e-06	3.57978e-05	0.0003019	0.000438955	0.000189328	0.000285531	1.58256e-05
C5	0.464601	0.0094082	0.00173838	0.0630606	4.06732	0.0234282	0.519847	0.00871913	0.0362083	0.00415113	0.000134113	8.357e-05	6.84377e-05	0.455464	0.462401	0.00184741	0.0050708	0.0184171	0.000264574	0.00539373	1.02212e-05	5.02537e-05	0.000147659	0.000170322	0.000131276	5.05399e-05	5.9195e-06
C6	0.465938	0.000410652	0.000168322	0.0615519	0.0234282	4.07058	0.00681071	0.516944	0.00367877	0.0369628	0.000214471	0.00243387	0.00260001	0.00323967	0.00458876	0.453654	0.464313	0.000285967	0.0187205	0.000288194	9.01182e-06	5.14253e-05	0.00635819	0.0054637	0.00309644	0.00363053	0.000138466
C7	0.0277424	0.0646603	0.0127695	0.00947172	0.519847	0.00681071	3.96458	0.000963661	0.875157	0.000731508	0.00180582	0.00155626	0.000801528	0.0173811	0.0190877	0.00787051	0.000725826	0.469903	0.000111948	0.0244308	0.000153341	0.000685433	2.76117e-05	0.000495532	0.00309806	5.87006e-05	9.41455e-05
C8	0.0277811	0.000214087	0.000176232	0.0128791	0.00871913	0.516944	0.000963661	3.97973	0.00146266	0.914843	2.9724e-05	0.000361441	0.000867245	0.0113461	0.00074022	0.0169549	0.0192108	0.000174121	0.466078	0.0024224	3.68695e-06	3.44444e-06	0.0302461	0.0290201	0.000232411	0.000884146	2.68622e-05
C9	0.0131395	0.579266	0.0420716	0.00493325	0.0362083	0.00367877	0.875157	0.00146266	4.09506	0.00356126	0.00209136	0.00502345	0.00108662	0.00582673	0.00887372	0.00577536	0.000256844	0.0293316	0.000109633	0.458332	0.000342361	0.000414972	0.000107428	0.00272479	0.00613874	8.97704e-05	0.000135653
C10	0.0160309	0.000578363	0.000902006	0.00302382	0.00415113	0.0369628	0.000731508	0.914843	0.00356126	4.08794	9.17254e-05	0.00227255	0.00445805	0.00757074	0.000319126	0.00521958	0.0103598	0.000186688	0.0277197	0.00642297	4.59943e-05	4.51331e-06	0.483683	0.471579	9.83752e-05	0.00111215	7.79236e-05
C11	0.000140704	0.0377405	0.528154	6.44003e-05	0.000134113	0.000214471	0.00180582	2.9724e-05	0.00209136	9.17254e-05	4.0131	0.516181	0.0363796	9.69241e-06	5.68511e-05	0.000498277	2.95125e-05	0.000111708	1.09143e-05	0.000289382	0.464241	0.463393	6.96315e-06	0.00028194	0.0188921	0.00624627	0.00621118
C12	0.000213802	0.00799926	0.0397877	0.000175514	8.357e-05	0.00243387	0.00155626	0.000361441	0.00502345	0.00227255	0.516181	3.96817	0.914639	6.46491e-06	3.48215e-05	0.00671588	0.000124806	6.70547e-05	0.000168892	0.000355861	0.0193786	0.0181875	0.00020421	0.00618046	0.464981	0.0296167	0.0300773
C13	0.000275009	0.00158948	0.0220317	0.000208326	6.84377e-05	0.00260001	0.000801528	0.000867245	0.00108662	0.00445805	0.0363796	0.914639	4.07546	8.44915e-06	4.13581e-05	0.00528458	0.000337578	3.66387e-05	0.000166237	8.79171e-05	0.00848172	0.00640198	0.00030338	0.00929555	0.0285448	0.478921	0.480508
H14	0.0233803	0.000798448	8.63109e-05	0.00517108	0.455464	0.00323967	0.0173811	0.0113461	0.00582673	0.00757074	9.69241e-06	6.46491e-06	8.44915e-06	0.373143	0.0139611	0.000103404	0.00024133	0.00465943	0.000630353	0.00342507	2.09538e-06	2.01133e-06	0.000210219	0.000221837	1.47111e-05	1.02437e-05	3.10532e-07
H15	0.0223199	0.00213536	0.00016784	0.00562366	0.462401	0.00458876	0.0190877	0.00074022	0.00887372	0.000319126	5.68511e-05	3.48215e-05	4.13581e-05	0.0139611	0.386577	0.000202719	0.000981896	0.0014362	1.91966e-05	0.000414983	4.18971e-06	1.78126e-05	9.2292e-06	1.97598e-05	5.08448e-05	1.99993e-05	3.03747e-06
H16	0.0190784	0.000491445	0.000196635	0.00789353	0.00184741	0.453654	0.00787051	0.0169549	0.00577536	0.00521958	0.000498277	0.00671588	0.00528458	0.000103404	0.000202719	0.378748	0.0143253	0.000210122	0.00455551	0.000275407	3.1332e-05	0.000131686	0.000360236	0.00285329	0.00687879	0.00373591	0.000326277
H17	0.0232281	3.14357e-05	1.26907e-05	0.00389108	0.0050708	0.464313	0.000725826	0.0192108	0.000256844	0.0103598	2.95125e-05	0.000124806	0.000337578	0.00024133	0.000981896	0.0143253	0.393836	1.69501e-05	0.000946839	6.48339e-05	2.57813e-06	2.68423e-06	0.000767061	0.000428773	0.000133479	0.000739429	3.99087e-05
H18	0.00376447	0.011343	0.00125552	0.000704846	0.0184171	0.000285967	0.469903	0.000174121	0.0293316	0.000186688	0.000111708	6.70547e-05	3.66387e-05	0.00465943	0.0014362	0.000210122	1.69501e-05	0.399735	1.76877e-05	0.00600401	2.06618e-05	2.44485e-05	7.73072e-06	6.02291e-05	0.000227753	2.88326e-06	5.93676e-06
H19	0.00231452	1.52243e-05	5.05425e-05	0.0113179	0.000264574	0.0187205	0.000111948	0.466078	0.000109633	0.0277197	1.09143e-05	0.000168892	0.000166237	0.000630353	1.91966e-05	0.00455551	0.000946839	1.76877e-05	0.383596	9.36749e-05	1.51632e-06	2.10289e-06	0.00355325	0.00606065	0.000122536	5.54512e-05	3.22517e-06
H20	0.000798538	0.0265657	0.00990241	0.000287422	0.00539373	0.000288194	0.0244308	0.0024224	0.458332	0.00642297	0.000289382	0.000355861	8.79171e-05	0.00342507	0.000414983	0.000275407	6.48339e-05	0.00600401	9.36749e-05	0.365447	0.000164019	1.3512e-05	0.000188902	0.00349526	0.000135749	6.65537e-06	4.78747e-06
H21	1.23084e-05	0.00637851	0.0302391	5.17084e-06	1.02212e-05	9.01182e-06	0.000153341	3.68695e-06	0.000342361	4.59943e-05	0.464241	0.0193786	0.00848172	2.09538e-06	4.18971e-06	3.1332e-05	2.57813e-06	2.06618e-05	1.51632e-06	0.000164019	0.390711	0.0145188	3.78096e-06	0.000143775	0.00144083	0.000812314	0.000449332
H22	6.37022e-05	0.0082115	0.0259038	3.57978e-05	5.02537e-05	5.14253e-05	0.000685433	3.44444e-06	0.000414972	4.51331e-06	0.463393	0.0181875	0.00640198	2.01133e-06	1.78126e-05	0.000131686	2.68423e-06	2.44485e-05	2.10289e-06	1.3512e-05	0.0145188	0.396681	3.70681e-07	1.33727e-05	0.00481324	0.00045404	0.00405618
H23	0.00133842	1.17017e-05	5.62918e-05	0.0003019	0.000147659	0.00635819	2.76117e-05	0.0302461	0.000107428	0.483683	6.96315e-06	0.00020421	0.00030338	0.000210219	9.2292e-06	0.000360236	0.000767061	7.73072e-06	0.00355325	0.000188902	3.78096e-06	3.70681e-07	0.410089	0.0161062	5.39348e-06	4.53692e-05	3.39736e-06
H24	0.000680253	0.000452724	0.00332769	0.000438955	0.000170322	0.0054637	0.000495532	0.0290201	0.00272479	0.471579	0.00028194	0.00618046	0.00929555	0.000221837	1.97598e-05	0.00285329	0.000428773	6.02291e-05	0.00606065	0.00349526	0.000143775	1.33727e-05	0.0161062	0.392483	0.00027521	0.000942312	0.000297256
H25	0.000328477	0.00775697	0.00222159	0.000189328	0.000131276	0.00309644	0.00309806	0.000232411	0.00613874	9.83752e-05	0.0188921	0.464981	0.0285448	1.47111e-05	5.08448e-05	0.00687879	0.000133479	0.000227753	0.000122536	0.000135749	0.00144083	0.00481324	5.39348e-06	0.00027521	0.400628	0.00353416	0.00660137
H26	0.000426775	0.000160393	0.00142079	0.000285531	5.05399e-05	0.00363053	5.87006e-05	0.000884146	8.97704e-05	0.00111215	0.00624627	0.0296167	0.478921	1.02437e-05	1.99993e-05	0.00373591	0.000739429	2.88326e-06	5.54512e-05	6.65537e-06	0.000812314	0.00045404	4.53692e-05	0.000942312	0.00353416	0.403308	0.0164126
H27	2.53977e-05	0.000344355	0.00102276	1.58256e-05	5.9195e-06	0.000138466	9.41455e-05	2.68622e-05	0.000135653	7.79236e-05	0.00621118	0.0300773	0.480508	3.10532e-07	3.03747e-06	0.000326277	3.99087e-05	5.93676e-06	3.22517e-06	4.78747e-06	0.000449332	0.00405618	3.39736e-06	0.000297256	0.00660137	0.0164126	0.411228
LDM — ajoene_e_20_LIDI_matrix
	S1	S2	S3	O4	C5	C6	C7	C8	C9	C10	C11	C12	C13	H14	H15	H16	H17	H18	H19	H20	H21	H22	H23	H24	H25	H26	H27
S1	12.9442	0.00351168	0.00139661	0.680411	0.459724	0.467737	0.0295579	0.0271818	0.0195408	0.01413	0.000217858	0.00104429	0.000115037	0.0230583	0.0206834	0.023204	0.0227376	0.00165479	0.004433	0.000997911	0.000103916	6.31812e-05	0.000944541	0.000772704	0.00177799	2.92098e-05	8.64227e-05		92.2794	31.7182	63.4364
S2	0.00351168	14.5418	0.651758	0.00172994	0.00929279	0.000409339	0.0651866	7.61236e-05	0.579772	0.000136353	0.0389547	0.00356282	0.00181497	0.00118966	0.00131478	0.000668788	4.15849e-05	0.0130066	2.60465e-05	0.0262933	0.00670333	0.0146316	1.0542e-05	0.000266459	0.00111857	0.000242581	0.000250225
S3	0.00139661	0.651758	14.636	0.00068566	0.00181474	0.000114622	0.014378	1.56125e-05	0.0419828	1.27415e-05	0.526796	0.0422853	0.019656	0.000209063	0.000108885	0.0001867	1.76531e-05	0.001424	4.14063e-06	0.00884274	0.0262781	0.0290041	1.36838e-06	3.40009e-05	0.00437963	0.00101406	0.00143569
O4	0.680411	0.00172994	0.00068566	8.33103	0.0611145	0.0614783	0.0116518	0.00934435	0.0162006	0.00522234	0.000972264	0.0120899	0.00172684	0.00464133	0.00833687	0.00492539	0.004912	0.000514752	0.000734336	0.00733604	0.000357899	5.45908e-05	0.0005867	0.000293784	0.0261725	0.000337392	0.00123871
C5	0.459724	0.00929279	0.00181474	0.0611145	4.06359	0.0225057	0.520453	0.00750944	0.0349387	0.00402372	0.000133452	9.44024e-05	3.82946e-05	0.463796	0.464706	0.0025745	0.0048731	0.0183596	0.000348557	0.00456439	3.78464e-05	1.82757e-05	0.000104139	0.00029149	0.000231746	7.08835e-06	3.64146e-05
C6	0.467737	0.000409339	0.000114622	0.0614783	0.0225057	4.07113	0.00992085	0.519843	0.00281495	0.0369948	0.00010817	0.00136705	0.000353285	0.00475633	0.00134853	0.453996	0.462286	0.00146962	0.0197291	0.000167187	2.04517e-05	0.000154485	0.0062891	0.00596922	0.00212071	2.83843e-05	5.32902e-05
C7	0.0295579	0.0651866	0.014378	0.0116518	0.520453	0.00992085	3.95688	0.00187781	0.868353	0.00272113	0.0015468	0.000930103	0.000216795	0.0185541	0.017969	0.0106458	0.00080883	0.465853	0.000190804	0.0232848	0.000515562	0.000213296	9.19622e-05	0.00232746	0.00227336	5.74538e-05	1.07372e-05
C8	0.0271818	7.61236e-05	1.56125e-05	0.00934435	0.00750944	0.519843	0.00187781	3.98228	0.000355228	0.916709	8.77852e-06	0.000134316	3.26826e-05	0.000842181	0.00753897	0.0168116	0.0188518	0.0018815	0.473629	5.61712e-05	1.74851e-06	1.66124e-05	0.0299363	0.0299086	0.000211002	2.73431e-06	5.45898e-06
C9	0.0195408	0.579772	0.0419828	0.0162006	0.0349387	0.00281495	0.868353	0.000355228	4.08935	0.000392951	0.00243765	0.00366667	0.000549871	0.00674214	0.00481141	0.0042355	0.000212663	0.0288799	9.98447e-05	0.458654	0.000480258	0.00061861	2.42202e-05	0.000350239	0.00653796	0.00015704	5.67796e-05
C10	0.01413	0.000136353	1.27415e-05	0.00522234	0.00402372	0.0369948	0.00272113	0.916709	0.000392951	4.07788	5.02386e-06	3.86947e-05	1.61285e-05	0.000250242	0.00520185	0.00559918	0.0100096	0.00535964	0.0296725	0.000100508	1.42253e-06	1.12946e-05	0.482836	0.478207	4.0067e-05	8.50404e-07	5.69669e-06
C11	0.000217858	0.0389547	0.526796	0.000972264	0.000133452	0.00010817	0.0015468	8.77852e-06	0.00243765	5.02386e-06	4.01752	0.516303	0.0382781	3.78868e-05	1.8016e-05	0.00037728	1.88815e-05	0.000115115	4.60709e-06	0.000273637	0.465163	0.460707	3.02813e-07	1.00095e-05	0.0172057	0.00653009	0.00636772
C12	0.00104429	0.00356282	0.0422853	0.0120899	9.44024e-05	0.00136705	0.000930103	0.000134316	0.00366667	3.86947e-05	0.516303	3.99722	0.923016	1.80233e-05	1.56292e-05	0.00279123	0.000312264	4.38721e-05	5.04521e-05	0.000561425	0.0185824	0.018807	3.2723e-06	1.14607e-05	0.448777	0.0311615	0.0299856
C13	0.000115037	0.00181497	0.019656	0.00172684	3.82946e-05	0.000353285	0.000216795	3.26826e-05	0.000549871	1.61285e-05	0.0382781	0.923016	4.09179	5.54331e-06	7.84435e-06	0.000745091	0.000246392	1.44056e-05	1.15819e-05	8.24949e-05	0.0068418	0.0101763	1.8835e-06	3.6229e-06	0.0260708	0.482928	0.482766
H14	0.0230583	0.00118966	0.000209063	0.00464133	0.463796	0.00475633	0.0185541	0.000842181	0.00674214	0.000250242	3.78868e-05	1.80233e-05	5.54331e-06	0.386472	0.0145988	0.000192154	0.00094986	0.00325778	2.15977e-05	0.0017347	1.10917e-05	4.3725e-06	5.22674e-06	4.88691e-05	2.75914e-05	1.22854e-06	1.25435e-06
H15	0.0206834	0.00131478	0.000108885	0.00833687	0.464706	0.00134853	0.017969	0.00753897	0.00481141	0.00520185	1.8016e-05	1.56292e-05	7.84435e-06	0.0145988	0.388746	0.000108023	0.000169731	0.00268294	0.000359894	0.000296064	1.34508e-06	1.64574e-06	0.00013058	0.000161564	3.70907e-05	7.7483e-07	7.05839e-06
H16	0.023204	0.000668788	0.0001867	0.00492539	0.0025745	0.453996	0.0106458	0.0168116	0.0042355	0.00559918	0.00037728	0.00279123	0.000745091	0.000192154	0.000108023	0.373536	0.0139751	0.00205865	0.00488347	0.000101506	4.01374e-05	0.00030226	0.00039684	0.00339998	0.0031516	7.62618e-05	3.65697e-05
H17	0.0227376	4.15849e-05	1.76531e-05	0.004912	0.0048731	0.462286	0.00080883	0.0188518	0.000212663	0.0100096	1.88815e-05	0.000312264	0.000246392	0.00094986	0.000169731	0.0139751	0.385999	0.000145152	0.00126519	1.01616e-05	4.86082e-06	1.37265e-05	0.000774988	0.000488266	0.000187498	9.37812e-06	5.98582e-05
H18	0.00165479	0.0130066	0.001424	0.000514752	0.0183596	0.00146962	0.465853	0.0018815	0.0288799	0.00535964	0.000115115	4.38721e-05	1.44056e-05	0.00325778	0.00268294	0.00205865	0.000145152	0.398037	0.000136998	0.0058387	2.2143e-05	5.62808e-05	0.000263142	0.00454545	7.50604e-05	2.55541e-06	8.06593e-07
H19	0.004433	2.60465e-05	4.14063e-06	0.000734336	0.000348557	0.0197291	0.000190804	0.473629	9.98447e-05	0.0296725	4.60709e-06	5.04521e-05	1.15819e-05	2.15977e-05	0.000359894	0.00488347	0.00126519	0.000136998	0.408966	7.69966e-06	7.39039e-07	1.42785e-05	0.00367938	0.0066919	7.37251e-05	1.43267e-06	8.52901e-07
H20	0.000997911	0.0262933	0.00884274	0.00733604	0.00456439	0.000167187	0.0232848	5.61712e-05	0.458654	0.000100508	0.000273637	0.000561425	8.24949e-05	0.0017347	0.000296064	0.000101506	1.01616e-05	0.0058387	7.69966e-06	0.357539	4.69065e-05	0.000138686	3.84592e-06	0.000102926	0.00103574	2.20149e-05	1.06208e-05
H21	0.000103916	0.00670333	0.0262781	0.000357899	3.78464e-05	2.04517e-05	0.000515562	1.74851e-06	0.000480258	1.42253e-06	0.465163	0.0185824	0.0068418	1.10917e-05	1.34508e-06	4.01374e-05	4.86082e-06	2.2143e-05	7.39039e-07	4.69065e-05	0.400921	0.0144333	1.33037e-07	1.01203e-06	0.00457405	0.0045725	0.000496345
H22	6.31812e-05	0.0146316	0.0290041	5.45908e-05	1.82757e-05	0.000154485	0.000213296	1.66124e-05	0.00061861	1.12946e-05	0.460707	0.018807	0.0101763	4.3725e-06	1.64574e-06	0.00030226	1.37265e-05	5.62808e-05	1.42785e-05	0.000138686	0.0144333	0.388388	1.39935e-06	1.90475e-05	0.000841383	0.000454313	0.000732864
H23	0.000944541	1.0542e-05	1.36838e-06	0.0005867	0.000104139	0.0062891	9.19622e-05	0.0299363	2.42202e-05	0.482836	3.02813e-07	3.2723e-06	1.8835e-06	5.22674e-06	0.00013058	0.00039684	0.000774988	0.000263142	0.00367938	3.84592e-06	1.33037e-07	1.39935e-06	0.405723	0.0164817	2.99107e-06	8.32776e-08	4.56714e-07
H24	0.000772704	0.000266459	3.40009e-05	0.000293784	0.00029149	0.00596922	0.00232746	0.0299086	0.000350239	0.478207	1.00095e-05	1.14607e-05	3.6229e-06	4.88691e-05	0.000161564	0.00339998	0.000488266	0.00454545	0.0066919	0.000102926	1.01203e-06	1.90475e-05	0.0164817	0.407254	1.16104e-05	2.61283e-07	3.23908e-07
H25	0.00177799	0.00111857	0.00437963	0.0261725	0.000231746	0.00212071	0.00227336	0.000211002	0.00653796	4.0067e-05	0.0172057	0.448777	0.0260708	2.75914e-05	3.70907e-05	0.0031516	0.000187498	7.50604e-05	7.37251e-05	0.00103574	0.00457405	0.000841383	2.99107e-06	1.16104e-05	0.347764	0.00602041	0.00332705
H26	2.92098e-05	0.000242581	0.00101406	0.000337392	7.08835e-06	2.83843e-05	5.74538e-05	2.73431e-06	0.00015704	8.50404e-07	0.00653009	0.0311615	0.482928	1.22854e-06	7.7483e-07	7.62618e-05	9.37812e-06	2.55541e-06	1.43267e-06	2.20149e-05	0.0045725	0.000454313	8.32776e-08	2.61283e-07	0.00602041	0.422955	0.0171284
H27	8.64227e-05	0.000250225	0.00143569	0.00123871	3.64146e-05	5.32902e-05	1.07372e-05	5.45898e-06	5.67796e-05	5.69669e-06	0.00636772	0.0299856	0.482766	1.25435e-06	7.05839e-06	3.65697e-05	5.98582e-05	8.06593e-07	8.52901e-07	1.06208e-05	0.000496345	0.000732864	4.56714e-07	3.23908e-07	0.00332705	0.0171284	0.40644
LDM — ajoene_e_21_LIDI_matrix
	S1	S2	S3	O4	C5	C6	C7	C8	C9	C10	C11	C12	C13	H14	H15	H16	H17	H18	H19	H20	H21	H22	H23	H24	H25	H26	H27
S1	12.9544	0.0027602	0.00161909	0.679477	0.460757	0.465772	0.0299874	0.0276529	0.0167949	0.0166906	0.000460939	0.000188651	0.000979865	0.0216627	0.0229279	0.0227601	0.0201713	0.00309461	0.00220415	0.000835577	0.000962131	5.6003e-05	0.000776528	0.00132675	7.55865e-05	5.68148e-05	0.00255093		92.2906	31.7089	63.4179
S2	0.0027602	14.5378	0.641347	0.000956358	0.00934631	0.000340832	0.061371	4.67811e-05	0.579176	5.3697e-05	0.0361933	0.0186277	0.0100341	0.00194108	0.000960012	0.000110431	6.07388e-05	0.0119509	9.72611e-06	0.0278981	0.00240079	0.00902441	5.21364e-06	2.95921e-06	0.00118147	0.000329907	0.000353823
S3	0.00161909	0.641347	14.6588	0.00124446	0.00182875	0.000233895	0.017463	1.63244e-05	0.0444941	3.04697e-05	0.528405	0.0380837	0.0201461	0.000210816	0.000120389	9.19188e-05	1.64417e-05	0.00141181	6.94653e-06	0.0103402	0.0272114	0.028114	1.84644e-06	1.35353e-06	0.00755141	0.00161547	0.00108175
O4	0.679477	0.000956358	0.00124446	8.32954	0.0611467	0.059928	0.0160913	0.0142378	0.0098863	0.00301835	0.00609419	0.000886614	0.00742794	0.00823668	0.00375678	0.00345122	0.00834263	0.000624358	0.0117574	0.00119443	0.0144549	0.000308668	0.000489199	0.000286307	0.000460984	0.000630342	0.0164176
C5	0.460757	0.00934631	0.00182875	0.0611467	4.0663	0.0241429	0.520064	0.00827172	0.037013	0.00489169	0.000193793	3.24953e-05	0.000108197	0.467386	0.453884	0.00473759	0.00385876	0.018641	0.000207631	0.00596693	0.000190365	2.51929e-05	0.000286035	0.000154879	6.19079e-06	3.45068e-06	0.000120293
C6	0.465772	0.000340832	0.000233895	0.059928	0.0241429	4.06588	0.00450543	0.517185	0.00191473	0.0374946	0.000135576	1.12203e-05	9.08351e-05	0.00254301	0.0043617	0.464393	0.466047	0.000266675	0.0186521	0.000128311	0.000243168	8.46774e-06	0.00627671	0.00634781	7.71921e-06	1.18422e-05	0.000333592
C7	0.0299874	0.061371	0.017463	0.0160913	0.520064	0.00450543	3.95204	0.000750153	0.873288	0.00047024	0.00207953	0.000966391	0.0024649	0.0185503	0.0172377	0.000989632	0.000479383	0.467994	2.46643e-05	0.0249555	0.00205163	0.000291681	4.14698e-05	1.45046e-05	7.64469e-05	7.79516e-05	0.00171951
C8	0.0276529	4.67811e-05	1.63244e-05	0.0142378	0.00827172	0.517185	0.000750153	3.97579	0.000172466	0.916345	6.032e-06	2.81171e-06	2.30488e-05	0.000467702	0.0128013	0.0190831	0.0177463	0.000252853	0.465259	0.000144688	1.15938e-05	4.88696e-07	0.0305918	0.0298913	1.65253e-06	2.0265e-06	6.12237e-05
C9	0.0167949	0.579176	0.0444941	0.0098863	0.037013	0.00191473	0.873288	0.000172466	4.07761	0.000296698	0.0060322	0.00147751	0.00150858	0.00783258	0.00645968	0.000645742	0.000166073	0.028111	2.39172e-05	0.462635	0.00512522	0.000641398	1.64647e-05	1.32579e-05	0.000172464	4.45838e-05	0.000811251
C10	0.0166906	5.3697e-05	3.04697e-05	0.00301835	0.00489169	0.0374946	0.00047024	0.916345	0.000296698	4.0818	7.05654e-06	1.41609e-06	4.81448e-06	0.000283919	0.0104747	0.0100621	0.00597483	0.00022595	0.0274755	0.00011751	9.29437e-06	6.01245e-07	0.481685	0.48276	3.6068e-07	3.38996e-07	2.81683e-05
C11	0.000460939	0.0361933	0.528405	0.00609419	0.000193793	0.000135576	0.00207953	6.032e-06	0.0060322	7.05654e-06	4.02618	0.516137	0.0372042	6.2722e-05	1.48338e-05	8.45698e-06	2.71646e-05	0.000155156	3.39385e-06	0.000501175	0.450849	0.463609	7.9013e-07	4.64148e-07	0.0200718	0.00634156	0.00570163
C12	0.000188651	0.0186277	0.0380837	0.000886614	3.24953e-05	1.12203e-05	0.000966391	2.81171e-06	0.00147751	1.41609e-06	0.516137	3.96753	0.91737	8.65046e-06	1.02871e-05	1.41467e-06	2.03606e-06	0.00067884	9.65115e-07	0.000210215	0.0170235	0.0192678	1.45877e-07	1.06372e-07	0.473546	0.0308996	0.0285157
C13	0.000979865	0.0100341	0.0201461	0.00742794	0.000108197	9.08351e-05	0.0024649	2.30488e-05	0.00150858	4.81448e-06	0.0372042	0.91737	4.08935	1.15937e-05	3.5152e-05	4.04689e-06	2.01214e-05	0.00165762	9.9851e-06	0.000124917	0.0056737	0.0101187	9.05309e-07	3.20469e-07	0.0291396	0.485576	0.468359
H14	0.0216627	0.00194108	0.000210816	0.00823668	0.467386	0.00254301	0.0185503	0.000467702	0.00783258	0.000283919	6.2722e-05	8.65046e-06	1.15937e-05	0.403634	0.0143997	0.000206936	0.00233874	0.00158023	6.65993e-05	0.00041885	4.91271e-05	6.95183e-06	8.24544e-05	1.17578e-05	8.93676e-07	3.40362e-07	1.26778e-05
H15	0.0229279	0.000960012	0.000120389	0.00375678	0.453884	0.0043617	0.0172377	0.0128013	0.00645968	0.0104747	1.48338e-05	1.02871e-05	3.5152e-05	0.0143997	0.371308	0.000324018	0.000347582	0.00444279	0.000390792	0.00406433	1.67331e-05	1.95885e-06	0.000583021	0.000262187	1.26089e-06	6.32661e-07	3.58274e-05
H16	0.0227601	0.000110431	9.19188e-05	0.00345122	0.00473759	0.464393	0.000989632	0.0190831	0.000645742	0.0100621	8.45698e-06	1.41467e-06	4.04689e-06	0.000206936	0.000324018	0.39002	0.0148564	2.07035e-05	0.00104091	3.22404e-05	1.10386e-05	1.78998e-06	0.000471665	0.000761483	5.08505e-07	5.06116e-07	8.2262e-06
H17	0.0201713	6.07388e-05	1.64417e-05	0.00834263	0.00385876	0.466047	0.000479383	0.0177463	0.000166073	0.00597483	2.71646e-05	2.03606e-06	2.01214e-05	0.00233874	0.000347582	0.0148564	0.401495	1.52686e-05	0.00499235	7.56565e-06	4.6208e-05	1.78065e-06	0.00386968	0.000445884	2.54515e-06	2.46045e-06	4.02446e-05
H18	0.00309461	0.0119509	0.00141181	0.000624358	0.018641	0.000266675	0.467994	0.000252853	0.028111	0.00022595	0.000155156	0.00067884	0.00165762	0.00158023	0.00444279	2.07035e-05	1.52686e-05	0.394806	7.00562e-06	0.0060206	6.66607e-05	3.08806e-05	8.67498e-06	7.93379e-06	2.77222e-05	4.19734e-05	0.000662906
H19	0.00220415	9.72611e-06	6.94653e-06	0.0117574	0.000207631	0.0186521	2.46643e-05	0.465259	2.39172e-05	0.0274755	3.39385e-06	9.65115e-07	9.9851e-06	6.65993e-05	0.000390792	0.00104091	0.00499235	7.00562e-06	0.380341	2.74858e-05	7.63352e-06	2.47472e-07	0.00645644	0.00350587	9.20165e-07	1.14993e-06	1.91172e-05
H20	0.000835577	0.0278981	0.0103402	0.00119443	0.00596693	0.000128311	0.0249555	0.000144688	0.462635	0.00011751	0.000501175	0.000210215	0.000124917	0.00041885	0.00406433	3.22404e-05	7.56565e-06	0.0060206	2.74858e-05	0.377692	0.000503434	2.83041e-05	3.98669e-06	5.39273e-06	3.8541e-05	5.63477e-06	2.49969e-05
H21	0.000962131	0.00240079	0.0272114	0.0144549	0.000190365	0.000243168	0.00205163	1.15938e-05	0.00512522	9.29437e-06	0.450849	0.0170235	0.0056737	4.91271e-05	1.67331e-05	1.10386e-05	4.6208e-05	6.66607e-05	7.63352e-06	0.000503434	0.355789	0.01372	1.22287e-06	6.25552e-07	0.00471973	0.000377207	0.00317049
H22	5.6003e-05	0.00902441	0.028114	0.000308668	2.51929e-05	8.46774e-06	0.000291681	4.88696e-07	0.000641398	6.01245e-07	0.463609	0.0192678	0.0101187	6.95183e-06	1.95885e-06	1.78998e-06	1.78065e-06	3.08806e-05	2.47472e-07	2.83041e-05	0.01372	0.399488	9.48581e-08	5.73184e-08	0.00110456	0.000782415	0.000434052
H23	0.000776528	5.21364e-06	1.84644e-06	0.000489199	0.000286035	0.00627671	4.14698e-05	0.0305918	1.64647e-05	0.481685	7.9013e-07	1.45877e-07	9.05309e-07	8.24544e-05	0.000583021	0.000471665	0.00386968	8.67498e-06	0.00645644	3.98669e-06	1.22287e-06	9.48581e-08	0.4161	0.0168752	8.3589e-08	1.08819e-07	2.35189e-06
H24	0.00132675	2.95921e-06	1.35353e-06	0.000286307	0.000154879	0.00634781	1.45046e-05	0.0298913	1.32579e-05	0.48276	4.64148e-07	1.06372e-07	3.20469e-07	1.17578e-05	0.000262187	0.000761483	0.000445884	7.93379e-06	0.00350587	5.39273e-06	6.25552e-07	5.73184e-08	0.0168752	0.405674	1.93816e-08	4.15075e-08	2.6617e-06
H25	7.55865e-05	0.00118147	0.00755141	0.000460984	6.19079e-06	7.71921e-06	7.64469e-05	1.65253e-06	0.000172464	3.6068e-07	0.0200718	0.473546	0.0291396	8.93676e-07	1.26089e-06	5.08505e-07	2.54515e-06	2.77222e-05	9.20165e-07	3.8541e-05	0.00471973	0.00110456	8.3589e-08	1.93816e-08	0.415564	0.00365467	0.00620147
H26	5.68148e-05	0.000329907	0.00161547	0.000630342	3.45068e-06	1.18422e-05	7.79516e-05	2.0265e-06	4.45838e-05	3.38996e-07	0.00634156	0.0308996	0.485576	3.40362e-07	6.32661e-07	5.06116e-07	2.46045e-06	4.19734e-05	1.14993e-06	5.63477e-06	0.000377207	0.000782415	1.08819e-07	4.15075e-08	0.00365467	0.419221	0.0158619
H27	0.00255093	0.000353823	0.00108175	0.0164176	0.000120293	0.000333592	0.00171951	6.12237e-05	0.000811251	2.81683e-05	0.00570163	0.0285157	0.468359	1.26778e-05	3.58274e-05	8.2262e-06	4.02446e-05	0.000662906	1.91172e-05	2.49969e-05	0.00317049	0.000434052	2.35189e-06	2.6617e-06	0.00620147	0.0158619	0.376308
LDM — ajoene_e_22_LIDI_matrix
	S1	S2	S3	O4	C5	C6	C7	C8	C9	C10	C11	C12	C13	H14	H15	H16	H17	H18	H19	H20	H21	H22	H23	H24	H25	H26	H27
S1	12.9416	0.0017512	0.00361338	0.678941	0.456918	0.469614	0.0285954	0.0321007	0.0196433	0.0182293	0.00063688	0.000109193	0.000511045	0.021881	0.019475	0.0210457	0.0231707	0.00118021	0.00141986	0.000842897	4.71947e-05	0.00141122	0.000864817	0.000977205	5.92543e-05	4.75366e-05	0.000989911		92.298	31.7017	63.4034
S2	0.0017512	14.5912	0.637617	0.000511622	0.00917274	0.000547682	0.0506926	9.71797e-05	0.569181	6.90545e-05	0.0386512	0.00960363	0.00433632	0.00148189	0.000918726	0.000130705	0.0011384	0.0122711	4.08479e-05	0.029108	0.0074438	0.0037522	4.16824e-06	4.56548e-06	0.000530951	0.000491662	0.00018359
S3	0.00361338	0.637617	14.6381	0.00167561	0.00186792	0.00455373	0.0248113	0.000666919	0.048346	0.000204557	0.528281	0.0395631	0.0166752	0.000336927	0.000195648	0.000216161	0.0135353	0.00145691	0.000291609	0.00314951	0.0304977	0.0255924	1.73734e-05	2.48387e-05	0.00651819	0.00117281	0.000823391
O4	0.678941	0.000511622	0.00167561	8.33328	0.061162	0.0606151	0.0161037	0.00921227	0.00378581	0.00306894	0.00831199	0.00102754	0.00786907	0.00295505	0.00784227	0.00853105	0.00464203	0.00628254	0.00405938	0.000321918	0.000447667	0.0194759	0.00034921	0.000172063	0.000478925	0.000645723	0.0172606
C5	0.456918	0.00917274	0.00186792	0.061162	4.06769	0.0237868	0.519622	0.00503436	0.0356159	0.00216214	0.000197922	3.39244e-05	0.000104951	0.467299	0.46552	0.00364416	0.00287864	0.0175116	0.00020814	0.00539622	1.32368e-05	0.00038522	0.00011614	0.000230274	1.45922e-05	8.93507e-06	0.000228793
C6	0.469614	0.000547682	0.00455373	0.0606151	0.0237868	4.07687	0.00635288	0.516376	0.00644201	0.0385062	0.000493532	0.000229919	0.000551266	0.00456263	0.00469036	0.465064	0.446705	0.000213787	0.0186121	0.00184979	3.31482e-05	0.00084425	0.00640673	0.00642489	1.49765e-05	3.18235e-05	0.000368857
C7	0.0285954	0.0506926	0.0248113	0.0161037	0.519622	0.00635288	3.94195	0.000826337	0.873435	0.000320062	0.00394512	0.000559128	0.000265995	0.0188159	0.0179799	0.000381498	0.00701593	0.460638	2.60821e-05	0.0266754	0.000228408	0.00785772	2.16136e-05	5.28571e-05	0.000206738	1.66339e-05	3.45129e-05
C8	0.0321007	9.71797e-05	0.000666919	0.00921227	0.00503436	0.516376	0.000826337	3.97857	0.000673884	0.922338	8.97811e-05	0.0011144	0.0036982	0.000934057	0.000505495	0.0179926	0.0171514	2.70949e-05	0.463811	0.000247853	4.22189e-05	5.68468e-05	0.0306952	0.0300722	5.48753e-05	7.13966e-05	0.00247273
C9	0.0196433	0.569181	0.048346	0.00378581	0.0356159	0.00644201	0.873435	0.000673884	4.07992	0.000711138	0.00435837	0.00063169	0.000182343	0.00700067	0.00588737	0.00051961	0.0120026	0.0266631	2.45763e-05	0.467143	0.0005064	0.00382945	3.07616e-05	4.98636e-05	0.000193199	1.6757e-05	3.08634e-05
C10	0.0182293	6.90545e-05	0.000204557	0.00306894	0.00216214	0.0385062	0.000320062	0.922338	0.000711138	4.08037	3.11122e-05	0.00011969	0.000411516	0.000549092	9.77112e-05	0.0067765	0.00793348	1.01415e-05	0.0277739	7.60474e-05	5.60673e-06	3.31001e-05	0.481902	0.483138	8.56542e-06	1.15025e-05	0.000282037
C11	0.00063688	0.0386512	0.528281	0.00831199	0.000197922	0.000493532	0.00394512	8.97811e-05	0.00435837	3.11122e-05	4.02813	0.514857	0.0374914	1.8857e-05	4.37078e-05	5.29226e-05	0.0014718	0.0022816	0.000181955	0.000373606	0.464067	0.444224	4.74179e-06	2.78699e-06	0.0199445	0.00637026	0.00541303
C12	0.000109193	0.00960363	0.0395631	0.00102754	3.39244e-05	0.000229919	0.000559128	0.0011144	0.00063169	0.00011969	0.514857	3.9846	0.919562	8.46114e-06	6.3352e-06	2.08703e-05	0.000445458	0.000260178	0.00321924	6.45982e-05	0.0193135	0.0165702	5.97569e-05	2.09929e-05	0.474429	0.0308327	0.0278968
C13	0.000511045	0.00433632	0.0166752	0.00786907	0.000104951	0.000551266	0.000265995	0.0036982	0.000182343	0.000411516	0.0374914	0.919562	4.09076	1.03506e-05	2.72872e-05	8.6584e-05	0.000408484	4.0915e-05	0.00982817	1.68804e-05	0.0104635	0.00576706	0.000162449	5.1277e-05	0.0297281	0.484781	0.464585
H14	0.021881	0.00148189	0.000336927	0.00295505	0.467299	0.00456263	0.0188159	0.000934057	0.00700067	0.000549092	1.8857e-05	8.46114e-06	1.03506e-05	0.392144	0.0148282	0.000268697	0.000183669	0.00178776	2.1314e-05	0.000410689	1.64131e-06	2.73272e-05	2.75057e-05	5.79786e-05	1.19618e-06	8.22093e-07	8.2633e-06
H15	0.019475	0.000918726	0.000195648	0.00784227	0.46552	0.00469036	0.0179799	0.000505495	0.00588737	9.77112e-05	4.37078e-05	6.3352e-06	2.72872e-05	0.0148282	0.39662	0.00377563	0.000242671	0.0044772	0.000121277	0.00338721	6.08788e-06	9.21071e-05	1.69742e-05	1.00822e-05	2.41801e-06	2.40639e-06	4.65287e-05
H16	0.0210457	0.000130705	0.000216161	0.00853105	0.00364416	0.465064	0.000381498	0.0179926	0.00051961	0.0067765	5.29226e-05	2.08703e-05	8.6584e-05	0.000268697	0.00377563	0.404743	0.0137647	0.000104154	0.00473134	0.000611357	6.20691e-06	7.97165e-05	0.00410146	0.000484774	1.32226e-06	5.69944e-06	5.6066e-05
H17	0.0231707	0.0011384	0.0135353	0.00464203	0.00287864	0.446705	0.00701593	0.0171514	0.0120026	0.00793348	0.0014718	0.000445458	0.000408484	0.000183669	0.000242671	0.0137647	0.354554	0.000154427	0.00146631	0.00248624	0.000203587	0.00135503	0.00043949	0.000698591	2.39436e-05	1.6882e-05	0.000108652
H18	0.00118021	0.0122711	0.00145691	0.00628254	0.0175116	0.000213787	0.460638	2.70949e-05	0.0266631	1.01415e-05	0.0022816	0.000260178	4.0915e-05	0.00178776	0.0044772	0.000104154	0.000154427	0.374349	3.86231e-06	0.00600914	0.000203622	0.00386105	1.0012e-06	1.6126e-06	8.35839e-05	2.73533e-06	1.33225e-05
H19	0.00141986	4.08479e-05	0.000291609	0.00405938	0.00020814	0.0186121	2.60821e-05	0.463811	2.45763e-05	0.0277739	0.000181955	0.00321924	0.00982817	2.1314e-05	0.000121277	0.00473134	0.00146631	3.86231e-06	0.383195	1.96257e-05	9.34477e-05	4.26845e-05	0.00634119	0.00349466	0.000152494	0.000423519	0.0052983
H20	0.000842897	0.029108	0.00314951	0.000321918	0.00539622	0.00184979	0.0266754	0.000247853	0.467143	7.60474e-05	0.000373606	6.45982e-05	1.68804e-05	0.000410689	0.00338721	0.000611357	0.00248624	0.00600914	1.96257e-05	0.391528	0.00014829	0.000137824	5.67961e-06	9.58636e-06	7.01275e-06	3.32847e-06	2.31981e-06
H21	4.71947e-05	0.0074438	0.0304977	0.000447667	1.32368e-05	3.31482e-05	0.000228408	4.22189e-05	0.0005064	5.60673e-06	0.464067	0.0193135	0.0104635	1.64131e-06	6.08788e-06	6.20691e-06	0.000203587	0.000203622	9.34477e-05	0.00014829	0.395656	0.0136268	1.90405e-06	9.80243e-07	0.00104514	0.000791687	0.000430099
H22	0.00141122	0.0037522	0.0255924	0.0194759	0.00038522	0.00084425	0.00785772	5.68468e-05	0.00382945	3.31001e-05	0.444224	0.0165702	0.00576706	2.73272e-05	9.21071e-05	7.97165e-05	0.00135503	0.00386105	4.26845e-05	0.000137824	0.0136268	0.351535	3.56391e-06	2.91203e-06	0.00450298	0.00039368	0.00293191
H23	0.000864817	4.16824e-06	1.73734e-05	0.00034921	0.00011614	0.00640673	2.16136e-05	0.0306952	3.07616e-05	0.481902	4.74179e-06	5.97569e-05	0.000162449	2.75057e-05	1.69742e-05	0.00410146	0.00043949	1.0012e-06	0.00634119	5.67961e-06	1.90405e-06	3.56391e-06	0.416697	0.0168794	3.36906e-06	3.69075e-06	0.000104905
H24	0.000977205	4.56548e-06	2.48387e-05	0.000172063	0.000230274	0.00642489	5.28571e-05	0.0300722	4.98636e-05	0.483138	2.78699e-06	2.09929e-05	5.1277e-05	5.79786e-05	1.00822e-05	0.000484774	0.000698591	1.6126e-06	0.00349466	9.58636e-06	9.80243e-07	2.91203e-06	0.0168794	0.407203	1.10568e-06	1.67486e-06	2.93546e-05
H25	5.92543e-05	0.000530951	0.00651819	0.000478925	1.45922e-05	1.49765e-05	0.000206738	5.48753e-05	0.000193199	8.56542e-06	0.0199445	0.474429	0.0297281	1.19618e-06	2.41801e-06	1.32226e-06	2.39436e-05	8.35839e-05	0.000152494	7.01275e-06	0.00104514	0.00450298	3.36906e-06	1.10568e-06	0.414885	0.00368283	0.00610399
H26	4.75366e-05	0.000491662	0.00117281	0.000645723	8.93507e-06	3.18235e-05	1.66339e-05	7.13966e-05	1.6757e-05	1.15025e-05	0.00637026	0.0308327	0.484781	8.22093e-07	2.40639e-06	5.69944e-06	1.6882e-05	2.73533e-06	0.000423519	3.32847e-06	0.000791687	0.00039368	3.69075e-06	1.67486e-06	0.00368283	0.415922	0.0155473
H27	0.000989911	0.00018359	0.000823391	0.0172606	0.000228793	0.000368857	3.45129e-05	0.00247273	3.08634e-05	0.000282037	0.00541303	0.0278968	0.464585	8.2633e-06	4.65287e-05	5.6066e-05	0.000108652	1.33225e-05	0.0052983	2.31981e-06	0.000430099	0.00293191	0.000104905	2.93546e-05	0.00610399	0.0155473	0.36588
LDM — ajoene_e_23_LIDI_matrix
	S1	S2	S3	O4	C5	C6	C7	C8	C9	C10	C11	C12	C13	H14	H15	H16	H17	H18	H19	H20	H21	H22	H23	H24	H25	H26	H27
S1	12.9418	0.00181128	0.00337776	0.684411	0.459334	0.468453	0.0293298	0.027285	0.0191223	0.0137046	0.000583766	7.80726e-05	3.79893e-05	0.0221627	0.0188015	0.0231331	0.0225273	0.00140345	0.00492984	0.000743011	9.54753e-05	0.00138922	0.000760776	0.00093858	1.06704e-05	2.42161e-06	3.49761e-06		92.3061	31.6949	63.3898
S2	0.00181128	14.5781	0.637479	0.000565853	0.00914918	0.000390005	0.051999	0.000125986	0.570568	0.000405725	0.0372191	0.00892649	0.00176453	0.00153953	0.000851118	3.00955e-05	0.000909666	0.0124943	1.99797e-05	0.0284436	0.00883194	0.00414392	0.000579964	1.50427e-05	0.0121655	0.000456699	0.000202189
S3	0.00337776	0.637479	14.6348	0.00168525	0.00187183	0.00319062	0.0244191	0.000248263	0.0480068	0.000552463	0.530646	0.0420699	0.0211468	0.000374863	0.000146421	0.000196556	0.010053	0.00135878	0.000177213	0.00338086	0.0267213	0.0264695	0.00209715	5.77062e-05	0.00362956	0.000978912	0.00152707
O4	0.684411	0.000565853	0.00168525	8.34887	0.0616929	0.0624174	0.0178563	0.00934909	0.0037862	0.0048901	0.00702377	0.000595117	0.000279134	0.00293627	0.00777486	0.00588903	0.00434376	0.0083737	0.000784945	0.000328048	0.000352322	0.0167807	0.000260962	0.000596937	5.24477e-05	1.63355e-05	3.07329e-05
C5	0.459334	0.00914918	0.00187183	0.0616929	4.07388	0.0230508	0.519078	0.00685699	0.0355931	0.00397701	0.000172433	2.42087e-05	1.2804e-05	0.467152	0.45978	0.00466645	0.00292692	0.0173607	0.000326565	0.00517727	2.39138e-05	0.000299324	0.000184974	0.00010233	2.20455e-05	9.87786e-07	8.6476e-07
C6	0.468453	0.000390005	0.00319062	0.0624174	0.0230508	4.07763	0.00616428	0.519947	0.00546863	0.0370727	0.00124207	0.000117291	9.46752e-05	0.00485342	0.00287948	0.461578	0.449236	0.000178411	0.0197821	0.000731427	0.000214986	0.0022868	0.00581987	0.00627959	7.91688e-06	4.80049e-06	9.10977e-06
C7	0.0293298	0.051999	0.0244191	0.0178563	0.519078	0.00616428	3.94282	0.000600168	0.873676	0.000445073	0.00349956	0.000331084	0.000234176	0.0189512	0.0173453	0.000669521	0.006804	0.460075	0.000117139	0.0263466	0.000460123	0.006895	0.000386342	2.39887e-05	0.000226016	1.3965e-05	1.85549e-05
C8	0.027285	0.000125986	0.000248263	0.00934909	0.00685699	0.519947	0.000600168	3.98353	0.000726116	0.916873	0.000127206	1.47147e-05	8.82021e-06	0.000627965	0.0101401	0.0189239	0.0166091	0.000149868	0.473592	0.00134859	2.40045e-05	0.000230906	0.0296992	0.0299671	2.05733e-06	5.16669e-07	1.17163e-06
C9	0.0191223	0.570568	0.0480068	0.0037862	0.0355931	0.00546863	0.873676	0.000726116	4.08383	0.00181564	0.00457183	0.000633415	0.000219696	0.0074732	0.00547022	0.000492022	0.0101912	0.0266316	0.000163082	0.464055	0.000495316	0.00436257	0.00307927	9.45937e-05	0.000374831	2.85783e-05	3.53059e-05
C10	0.0137046	0.000405725	0.000552463	0.0048901	0.00397701	0.0370727	0.000445073	0.916873	0.00181564	4.07966	3.74669e-05	1.11901e-05	4.37517e-06	0.00029981	0.00766776	0.010399	0.00554666	0.000182779	0.0295923	0.00486221	1.18962e-05	3.68578e-05	0.476506	0.482899	3.82076e-06	5.15808e-07	9.49583e-07
C11	0.000583766	0.0372191	0.530646	0.00702377	0.000172433	0.00124207	0.00349956	0.000127206	0.00457183	3.74669e-05	4.02873	0.515722	0.0372097	2.64411e-05	2.52751e-05	0.000141924	0.0031018	0.00118589	4.80397e-05	0.000293252	0.463448	0.444354	8.3793e-05	2.55021e-06	0.0191865	0.00637479	0.00634867
C12	7.80726e-05	0.00892649	0.0420699	0.000595117	2.42087e-05	0.000117291	0.000331084	1.47147e-05	0.000633415	1.11901e-05	0.515722	3.96856	0.923783	2.47414e-06	8.17211e-06	2.13505e-05	0.000380331	0.00033929	4.5343e-06	0.000142582	0.0182079	0.0176502	4.87288e-05	7.26676e-07	0.469514	0.0307648	0.030561
C13	3.79893e-05	0.00176453	0.0211468	0.000279134	1.2804e-05	9.46752e-05	0.000234176	8.82021e-06	0.000219696	4.37517e-06	0.0372097	0.923783	4.08215	4.12184e-06	2.05857e-06	7.28638e-06	0.000186055	6.44178e-05	6.34151e-06	3.01263e-05	0.00648761	0.00854228	2.0833e-05	4.84493e-07	0.028908	0.482071	0.484241
H14	0.0221627	0.00153953	0.000374863	0.00293627	0.467152	0.00485342	0.0189512	0.000627965	0.0074732	0.00029981	2.64411e-05	2.47414e-06	4.12184e-06	0.392888	0.0143087	0.000903861	0.000203159	0.00159526	1.96152e-05	0.000396476	1.01451e-05	3.4011e-05	1.38064e-05	7.43117e-06	1.85179e-06	2.48456e-07	2.06965e-07
H15	0.0188015	0.000851118	0.000146421	0.00777486	0.45978	0.00287948	0.0173453	0.0101401	0.00547022	0.00766776	2.52751e-05	8.17211e-06	2.05857e-06	0.0143087	0.379466	0.000342568	0.000176484	0.00437226	0.000316436	0.0031569	2.204e-06	5.53575e-05	0.000354409	0.000177825	1.31697e-05	2.75254e-07	2.1981e-07
H16	0.0231331	3.00955e-05	0.000196556	0.00588903	0.00466645	0.461578	0.000669521	0.0189239	0.000492022	0.010399	0.000141924	2.13505e-05	7.28638e-06	0.000903861	0.000342568	0.385195	0.0137062	1.91512e-05	0.00116709	8.88447e-05	9.88376e-05	0.000145913	0.000478927	0.000766128	5.33062e-06	1.10527e-06	8.15142e-07
H17	0.0225273	0.000909666	0.010053	0.00434376	0.00292692	0.449236	0.006804	0.0166091	0.0101912	0.00554666	0.0031018	0.000380331	0.000186055	0.000203159	0.000176484	0.0137062	0.363388	0.000134741	0.00468989	0.00143563	0.000304145	0.00367442	0.00332739	0.00038883	2.3583e-05	8.93206e-06	2.12711e-05
H18	0.00140345	0.0124943	0.00135878	0.0083737	0.0173607	0.000178411	0.460075	0.000149868	0.0266316	0.000182779	0.00118589	0.00033929	6.44178e-05	0.00159526	0.00437226	1.91512e-05	0.000134741	0.371906	1.05919e-05	0.00580976	0.000119278	0.0021329	0.00010962	6.14618e-06	0.000394662	1.57603e-05	5.30134e-06
H19	0.00492984	1.99797e-05	0.000177213	0.000784945	0.000326565	0.0197821	0.000117139	0.473592	0.000163082	0.0295923	4.80397e-05	4.5343e-06	6.34151e-06	1.96152e-05	0.000316436	0.00116709	0.00468989	1.05919e-05	0.40916	0.000125804	5.5163e-06	8.21044e-05	0.00657563	0.00367401	2.78011e-07	2.60766e-07	4.69119e-07
H20	0.000743011	0.0284436	0.00338086	0.000328048	0.00517727	0.000731427	0.0263466	0.00134859	0.464055	0.00486221	0.000293252	0.000142582	3.01263e-05	0.000396476	0.0031569	8.88447e-05	0.00143563	0.00580976	0.000125804	0.386405	2.90224e-05	0.000115483	0.00552525	0.000263177	0.000195833	7.58891e-06	6.10035e-06
H21	9.54753e-05	0.00883194	0.0267213	0.000352322	2.39138e-05	0.000214986	0.000460123	2.40045e-05	0.000495316	1.18962e-05	0.463448	0.0182079	0.00648761	1.01451e-05	2.204e-06	9.88376e-05	0.000304145	0.000119278	5.5163e-06	2.90224e-05	0.399843	0.0136803	3.85369e-06	7.97015e-07	0.00512277	0.0043224	0.000490587
H22	0.00138922	0.00414392	0.0264695	0.0167807	0.000299324	0.0022868	0.006895	0.000230906	0.00436257	3.68578e-05	0.444354	0.0176502	0.00854228	3.4011e-05	5.53575e-05	0.000145913	0.00367442	0.0021329	8.21044e-05	0.000115483	0.0136803	0.350376	2.32486e-05	2.48791e-06	0.00100309	0.000414096	0.00069025
H23	0.000760776	0.000579964	0.00209715	0.000260962	0.000184974	0.00581987	0.000386342	0.0296992	0.00307927	0.476506	8.3793e-05	4.87288e-05	2.0833e-05	1.38064e-05	0.000354409	0.000478927	0.00332739	0.00010962	0.00657563	0.00552525	3.85369e-06	2.32486e-05	0.401678	0.0162893	4.23778e-06	1.27204e-06	3.138e-06
H24	0.00093858	1.50427e-05	5.77062e-05	0.000596937	0.00010233	0.00627959	2.39887e-05	0.0299671	9.45937e-05	0.482899	2.55021e-06	7.26676e-07	4.84493e-07	7.43117e-06	0.000177825	0.000766128	0.00038883	6.14618e-06	0.00367401	0.000263177	7.97015e-07	2.48791e-06	0.0162893	0.405936	1.67556e-07	4.06529e-08	8.57145e-08
H25	1.06704e-05	0.0121655	0.00362956	5.24477e-05	2.20455e-05	7.91688e-06	0.000226016	2.05733e-06	0.000374831	3.82076e-06	0.0191865	0.469514	0.028908	1.85179e-06	1.31697e-05	5.33062e-06	2.3583e-05	0.000394662	2.78011e-07	0.000195833	0.00512277	0.00100309	4.23778e-06	1.67556e-07	0.40403	0.00663538	0.00363129
H26	2.42161e-06	0.000456699	0.000978912	1.63355e-05	9.87786e-07	4.80049e-06	1.3965e-05	5.16669e-07	2.85783e-05	5.15808e-07	0.00637479	0.0307648	0.482071	2.48456e-07	2.75254e-07	1.10527e-06	8.93206e-06	1.57603e-05	2.60766e-07	7.58891e-06	0.0043224	0.000414096	1.27204e-06	4.06529e-08	0.00663538	0.418364	0.0171015
H27	3.49761e-06	0.000202189	0.00152707	3.07329e-05	8.6476e-07	9.10977e-06	1.85549e-05	1.17163e-06	3.53059e-05	9.49583e-07	0.00634867	0.030561	0.484241	2.06965e-07	2.1981e-07	8.15142e-07	2.12711e-05	5.30134e-06	4.69119e-07	6.10035e-06	0.000490587	0.00069025	3.138e-06	8.57145e-08	0.00363129	0.0171015	0.413148
LDM — ajoene_e_24_LIDI_matrix
	S1	S2	S3	O4	C5	C6	C7	C8	C9	C10	C11	C12	C13	H14	H15	H16	H17	H18	H19	H20	H21	H22	H23	H24	H25	H26	H27
S1	12.9286	0.00235918	0.00176645	0.686516	0.464403	0.465819	0.0280941	0.0264287	0.0147582	0.0143358	0.000385652	6.23216e-05	7.28482e-05	0.0191907	0.0227953	0.0233069	0.0227229	0.00235985	0.00386251	0.000679957	2.08015e-05	0.000861907	0.000735454	0.00092743	2.33426e-05	0.000237979	4.18983e-06		92.2966	31.7062	63.4125
S2	0.00235918	14.5566	0.642727	0.000664934	0.00929799	0.000382032	0.0589408	0.000134599	0.57534	0.000560553	0.0387908	0.00954512	0.00507476	0.000907827	0.00196227	0.000477096	2.90686e-05	0.0114392	2.04063e-05	0.0285374	0.00711211	0.00468819	0.000856015	1.95487e-05	0.00042137	0.000222253	0.000464679
S3	0.00176645	0.642727	14.635	0.000355101	0.00177918	0.000466412	0.018138	0.000429437	0.0453659	0.00372434	0.526055	0.0406492	0.0198951	7.57775e-05	0.000375685	0.000937695	3.2662e-05	0.00122504	0.000182116	0.00738234	0.0294588	0.0278049	0.0111335	0.000221968	0.00486631	0.000966496	0.00109743
O4	0.686516	0.000664934	0.000355101	8.36808	0.0620777	0.0636134	0.0128477	0.009523	0.00287935	0.00537965	6.70017e-05	1.86108e-05	2.25048e-05	0.00832474	0.00411756	0.00606524	0.00536848	0.0113377	0.000708654	0.000496052	8.40596e-06	0.000186032	0.000265915	0.000592822	5.38574e-06	7.96532e-05	2.18182e-06
C5	0.464403	0.00929799	0.00177918	0.0620777	4.0696	0.0231663	0.51715	0.00712097	0.0362403	0.00409239	0.000158818	2.92462e-05	3.38494e-05	0.461566	0.463079	0.00284718	0.00475898	0.017206	0.000302517	0.00566112	1.01678e-05	0.000143673	0.000236342	0.000107181	8.90651e-06	3.10305e-05	2.66764e-06
C6	0.465819	0.000382032	0.000466412	0.0636134	0.0231663	4.07074	0.00905377	0.520274	0.00366209	0.0366405	0.00156572	0.000145228	0.000297918	0.00165535	0.00497053	0.451827	0.462977	0.000348369	0.0198438	0.000171447	7.3037e-05	0.00442566	0.00513723	0.00630657	9.33693e-05	0.000889225	3.30831e-05
C7	0.0280941	0.0589408	0.018138	0.0128477	0.51715	0.00905377	3.95778	0.00135981	0.876727	0.00176629	0.00181196	0.000419247	0.000430126	0.017491	0.0191796	0.0105732	0.000789278	0.459715	0.000166586	0.0255668	0.000128176	0.00230412	0.00178312	9.97135e-05	8.46826e-05	2.72817e-05	3.29168e-05
C8	0.0264287	0.000134599	0.000429437	0.009523	0.00712097	0.520274	0.00135981	3.98584	0.00130847	0.913436	0.000166003	0.000182802	0.00118304	0.00823922	0.000742304	0.0170447	0.0189738	0.000131634	0.474198	0.00122213	8.69448e-06	0.000473561	0.0280146	0.0300602	6.54101e-05	0.00349612	9.08674e-05
C9	0.0147582	0.57534	0.0453659	0.00287935	0.0362403	0.00366209	0.876727	0.00130847	4.08953	0.0047644	0.00392824	0.000614279	0.000201211	0.00588314	0.00942188	0.00579262	0.000277536	0.0268238	0.000150622	0.46273	0.000400779	0.00411459	0.00593298	0.000239738	0.0001674	3.19772e-05	1.6622e-05
C10	0.0143358	0.000560553	0.00372434	0.00537965	0.00409239	0.0366405	0.00176629	0.913436	0.0047644	4.07876	0.000997911	0.000628132	0.00356724	0.00626869	0.000273569	0.00523923	0.00971484	0.000143071	0.0296647	0.00380167	7.14588e-05	0.00209363	0.466666	0.482718	0.00013919	0.00732275	0.000215055
C11	0.000385652	0.0387908	0.526055	6.70017e-05	0.000158818	0.00156572	0.00181196	0.000166003	0.00392824	0.000997911	4.00749	0.515429	0.0373709	9.59733e-06	6.21006e-05	0.00428743	6.58948e-05	0.000172143	0.000109506	0.000315966	0.46386	0.455534	0.00284569	9.57365e-05	0.0196215	0.00589369	0.00633501
C12	6.23216e-05	0.00954512	0.0406492	1.86108e-05	2.92462e-05	0.000145228	0.000419247	0.000182802	0.000614279	0.000628132	0.515429	3.97927	0.920666	3.02953e-06	1.28945e-05	0.000343436	1.7891e-05	2.76714e-05	1.97243e-05	3.66509e-05	0.018831	0.0178584	0.00110951	2.12932e-05	0.473692	0.029679	0.0301399
C13	7.28482e-05	0.00507476	0.0198951	2.25048e-05	3.38494e-05	0.000297918	0.000430126	0.00118304	0.000201211	0.00356724	0.0373709	0.920666	4.08034	1.06251e-05	2.06045e-05	0.000321414	5.56378e-05	1.55863e-05	6.25969e-05	1.41951e-05	0.0089283	0.00633223	0.00278421	7.55044e-05	0.0294724	0.475308	0.483258
H14	0.0191907	0.000907827	7.57775e-05	0.00832474	0.461566	0.00165535	0.017491	0.00823922	0.00588314	0.00626869	9.59733e-06	3.02953e-06	1.06251e-05	0.386012	0.0142968	9.95402e-05	0.000196305	0.00464792	0.000277936	0.00379054	2.31664e-06	8.84808e-06	0.000222688	0.000149552	6.59599e-07	2.88422e-05	7.84129e-07
H15	0.0227953	0.00196227	0.000375685	0.00411756	0.463079	0.00497053	0.0191796	0.000742304	0.00942188	0.000273569	6.21006e-05	1.28945e-05	2.06045e-05	0.0142968	0.38709	0.000199711	0.000965561	0.000856561	1.85989e-05	0.000377164	3.54291e-06	4.54257e-05	4.22866e-05	6.68822e-06	1.30393e-06	7.91506e-06	2.10176e-06
H16	0.0233069	0.000477096	0.000937695	0.00606524	0.00284718	0.451827	0.0105732	0.0170447	0.00579262	0.00523923	0.00428743	0.000343436	0.000321414	9.95402e-05	0.000199711	0.376911	0.0140952	0.000825452	0.00479325	0.000144094	0.000214614	0.00996134	0.00260721	0.000349318	0.000192857	0.000619502	3.32566e-05
H17	0.0227229	2.90686e-05	3.2662e-05	0.00536848	0.00475898	0.462977	0.000789278	0.0189738	0.000277536	0.00971484	6.58948e-05	1.7891e-05	5.56378e-05	0.000196305	0.000965561	0.0140952	0.38814	2.41639e-05	0.00140931	3.93534e-05	3.46568e-06	0.000196233	0.000428493	0.000778399	8.73596e-06	0.000133306	5.63091e-06
H18	0.00235985	0.0114392	0.00122504	0.0113377	0.017206	0.000348369	0.459715	0.000131634	0.0268238	0.000143071	0.000172143	2.76714e-05	1.55863e-05	0.00464792	0.000856561	0.000825452	2.41639e-05	0.366961	2.48202e-05	0.00578003	3.3772e-05	0.000176751	7.63985e-05	4.75633e-06	4.6257e-06	1.63595e-06	1.22206e-06
H19	0.00386251	2.04063e-05	0.000182116	0.000708654	0.000302517	0.0198438	0.000166586	0.474198	0.000150622	0.0296647	0.000109506	1.97243e-05	6.25969e-05	0.000277936	1.85989e-05	0.00479325	0.00140931	2.48202e-05	0.410661	6.65722e-05	5.46044e-06	0.00020135	0.00625377	0.00376013	5.29067e-06	0.000111155	3.87698e-06
H20	0.000679957	0.0285374	0.00738234	0.000496052	0.00566112	0.000171447	0.0255668	0.00122213	0.46273	0.00380167	0.000315966	3.66509e-05	1.41951e-05	0.00379054	0.000377164	0.000144094	3.93534e-05	0.00578003	6.65722e-05	0.381169	0.000157392	0.000110581	0.00317407	0.000101756	4.90923e-06	6.93284e-06	1.243e-06
H21	2.08015e-05	0.00711211	0.0294588	8.40596e-06	1.01678e-05	7.3037e-05	0.000128176	8.69448e-06	0.000400779	7.14588e-05	0.46386	0.018831	0.0089283	2.31664e-06	3.54291e-06	0.000214614	3.46568e-06	3.3772e-05	5.46044e-06	0.000157392	0.390682	0.0146103	0.000279997	1.07172e-05	0.00153278	0.000498734	0.000808741
H22	0.000861907	0.00468819	0.0278049	0.000186032	0.000143673	0.00442566	0.00230412	0.000473561	0.00411459	0.00209363	0.455534	0.0178584	0.00633223	8.84808e-06	4.54257e-05	0.00996134	0.000196233	0.000176751	0.00020135	0.000110581	0.0146103	0.394017	0.00369611	0.000197419	0.00475603	0.00363328	0.000445586
H23	0.000735454	0.000856015	0.0111335	0.000265915	0.000236342	0.00513723	0.00178312	0.0280146	0.00593298	0.466666	0.00284569	0.00110951	0.00278421	0.000222688	4.22866e-05	0.00260721	0.000428493	7.63985e-05	0.00625377	0.00317407	0.000279997	0.00369611	0.383052	0.0156564	9.19828e-05	0.0030131	0.000166703
H24	0.00092743	1.95487e-05	0.000221968	0.000592822	0.000107181	0.00630657	9.97135e-05	0.0300602	0.000239738	0.482718	9.57365e-05	2.12932e-05	7.55044e-05	0.000149552	6.68822e-06	0.000349318	0.000778399	4.75633e-06	0.00376013	0.000101756	1.07172e-05	0.000197419	0.0156564	0.406381	2.8781e-06	0.000213925	3.80477e-06
H25	2.33426e-05	0.00042137	0.00486631	5.38574e-06	8.90651e-06	9.33693e-05	8.46826e-05	6.54101e-05	0.0001674	0.00013919	0.0196215	0.473692	0.0294724	6.59599e-07	1.30393e-06	0.000192857	8.73596e-06	4.6257e-06	5.29067e-06	4.90923e-06	0.00153278	0.00475603	9.19828e-05	2.8781e-06	0.408895	0.00649796	0.00363593
H26	0.000237979	0.000222253	0.000966496	7.96532e-05	3.10305e-05	0.000889225	2.72817e-05	0.00349612	3.19772e-05	0.00732275	0.00589369	0.029679	0.475308	2.88422e-05	7.91506e-06	0.000619502	0.000133306	1.63595e-06	0.000111155	6.93284e-06	0.000498734	0.00363328	0.0030131	0.000213925	0.00649796	0.400693	0.0162495
H27	4.18983e-06	0.000464679	0.00109743	2.18182e-06	2.66764e-06	3.30831e-05	3.29168e-05	9.08674e-05	1.6622e-05	0.000215055	0.00633501	0.0301399	0.483258	7.84129e-07	2.10176e-06	3.32566e-05	5.63091e-06	1.22206e-06	3.87698e-06	1.243e-06	0.000808741	0.000445586	0.000166703	3.80477e-06	0.00363593	0.0162495	0.408305
LDM — ajoene_e_25_LIDI_matrix
	S1	S2	S3	O4	C5	C6	C7	C8	C9	C10	C11	C12	C13	H14	H15	H16	H17	H18	H19	H20	H21	H22	H23	H24	H25	H26	H27
S1	12.9287	0.00218481	0.00116858	0.687422	0.464425	0.465302	0.0271839	0.0277813	0.0127297	0.0163416	0.00018825	3.93868e-05	0.000153569	0.0234069	0.0223495	0.0194519	0.0230465	0.00429031	0.00221996	0.000827493	0.000313281	2.91593e-05	0.000702064	0.00133038	1.84194e-05	0.000617369	1.58496e-05		92.2706	31.7308	63.4615
S2	0.00218481	14.5152	0.645845	0.000996974	0.00930521	0.000351179	0.0621449	0.000231076	0.578716	0.000650085	0.0375608	0.0168857	0.0145433	0.000840462	0.00206856	0.000443633	2.54981e-05	0.0122169	1.41115e-05	0.0271576	0.00317914	0.0086907	0.000583351	1.40659e-05	0.00055523	0.00151038	0.000388002
S3	0.00116858	0.645845	14.6358	0.000747269	0.00178924	0.0003696	0.0168583	0.000295605	0.0440238	0.00190377	0.526358	0.0394584	0.023334	7.9935e-05	0.000290065	0.000732407	2.13324e-05	0.00136914	9.57016e-05	0.00806845	0.0286319	0.0266586	0.00640841	0.000117996	0.00591735	0.001317	0.0015337
O4	0.687422	0.000996974	0.000747269	8.36865	0.0631104	0.0617874	0.00948642	0.0127391	0.00498774	0.00308473	0.000147774	1.30473e-05	3.18097e-05	0.00568503	0.00503469	0.00821354	0.00391988	0.000763222	0.0109088	0.000279263	0.000328603	2.0708e-05	0.00046076	0.000301765	8.59014e-06	0.00018095	3.07452e-06
C5	0.464425	0.00930521	0.00178924	0.0631104	4.06968	0.0232791	0.520182	0.00867839	0.0357878	0.00409619	0.000158646	2.08229e-05	3.97665e-05	0.455927	0.46237	0.00175628	0.0050556	0.0182532	0.000262789	0.00534082	8.89562e-05	2.14602e-05	0.000182215	0.000145147	5.5703e-06	0.000126295	1.3864e-06
C6	0.465302	0.000351179	0.0003696	0.0617874	0.0232791	4.06885	0.00767314	0.517439	0.00381061	0.0371039	0.00116224	8.6651e-05	0.000259481	0.00286076	0.00471579	0.457458	0.463996	0.000328078	0.0186624	0.000246602	0.00355522	7.67343e-05	0.00557851	0.00633732	8.59086e-05	0.00119142	3.16494e-05
C7	0.0271839	0.0621449	0.0168583	0.00948642	0.520182	0.00767314	3.96428	0.00128684	0.874848	0.00117801	0.00191282	0.000382899	0.000966419	0.0173179	0.0191065	0.00885339	0.000794635	0.467802	0.000127642	0.0249488	0.00172416	0.000328814	0.000793957	4.86151e-05	7.32475e-05	0.00173393	6.67286e-05
C8	0.0277813	0.000231076	0.000295605	0.0127391	0.00867839	0.517439	0.00128684	3.97703	0.00182306	0.915112	0.000114574	1.17496e-05	2.4729e-05	0.0104476	0.000761599	0.0172799	0.0191157	0.000169156	0.46583	0.00241814	0.00042855	1.53005e-05	0.0296163	0.0300074	6.34569e-06	0.000136151	3.01447e-06
C9	0.0127297	0.578716	0.0440238	0.00498774	0.0357878	0.00381061	0.874848	0.00182306	4.09218	0.00471644	0.00422269	0.000776655	0.000777983	0.00569929	0.00919714	0.00578502	0.000246426	0.0287259	0.000124636	0.459864	0.00387806	0.000501886	0.00354902	0.00016069	0.000136531	0.000965747	4.53026e-05
C10	0.0163416	0.000650085	0.00190377	0.00308473	0.00409619	0.0371039	0.00117801	0.915112	0.00471644	4.08222	0.000797148	7.7596e-05	2.17396e-05	0.0070028	0.000317857	0.00540577	0.0101837	0.000179511	0.0276883	0.00646046	0.00238759	5.21981e-05	0.474571	0.482952	3.83125e-05	2.49628e-05	1.46141e-06
C11	0.00018825	0.0375608	0.526358	0.000147774	0.000158646	0.00116224	0.00191282	0.000114574	0.00422269	0.000797148	4.00875	0.517414	0.037116	9.4073e-06	7.42698e-05	0.00350401	4.69681e-05	0.000143058	0.00010366	0.00027426	0.4573	0.463703	0.00276405	8.61326e-05	0.0197656	0.00613303	0.00624962
C12	3.93868e-05	0.0168857	0.0394584	1.30473e-05	2.08229e-05	8.6651e-05	0.000382899	1.17496e-05	0.000776655	7.7596e-05	0.517414	3.96333	0.915647	5.45753e-06	8.37164e-06	0.000369403	5.48883e-06	0.000271343	7.52949e-06	0.00019586	0.0182621	0.018865	0.000337359	9.01783e-06	0.472782	0.0301801	0.0299228
C13	0.000153569	0.0145433	0.023334	3.18097e-05	3.97665e-05	0.000259481	0.000966419	2.4729e-05	0.000777983	2.17396e-05	0.037116	0.915647	4.0745	1.56487e-05	7.51911e-06	0.00133427	1.42108e-05	0.000939074	1.36903e-05	0.000145237	0.00632384	0.00879751	6.4429e-05	1.59937e-06	0.0287903	0.478749	0.48315
H14	0.0234069	0.000840462	7.9935e-05	0.00568503	0.455927	0.00286076	0.0173179	0.0104476	0.00569929	0.0070028	9.4073e-06	5.45753e-06	1.56487e-05	0.373363	0.0139539	9.89758e-05	0.00021217	0.00474968	0.000603976	0.00349773	5.8913e-06	9.28183e-07	0.000203977	0.000196054	5.34097e-07	4.48749e-05	4.05142e-07
H15	0.0223495	0.00206856	0.000290065	0.00503469	0.46237	0.00471579	0.0191065	0.000761599	0.00919714	0.000317857	7.42698e-05	8.37164e-06	7.51911e-06	0.0139539	0.386158	0.000199041	0.000965605	0.00120975	2.0482e-05	0.000402961	4.3459e-05	1.04983e-05	2.79404e-05	9.28339e-06	1.11928e-06	8.6e-06	2.48586e-07
H16	0.0194519	0.000443633	0.000732407	0.00821354	0.00175628	0.457458	0.00885339	0.0172799	0.00578502	0.00540577	0.00350401	0.000369403	0.00133427	9.89758e-05	0.000199041	0.390137	0.0144953	0.000336388	0.00468813	0.000177485	0.00798398	0.000208189	0.00300229	0.000376802	0.000235687	0.00258565	0.000156196
H17	0.0230465	2.54981e-05	2.13324e-05	0.00391988	0.0050556	0.463996	0.000794635	0.0191157	0.000246426	0.0101837	4.69681e-05	5.48883e-06	1.42108e-05	0.00021217	0.000965605	0.0144953	0.390535	1.9599e-05	0.000994061	6.33677e-05	0.000155443	3.69953e-06	0.000440648	0.000759488	3.64546e-06	5.60883e-05	1.78157e-06
H18	0.00429031	0.0122169	0.00136914	0.000763222	0.0182532	0.000328078	0.467802	0.000169156	0.0287259	0.000179511	0.000143058	0.000271343	0.000939074	0.00474968	0.00120975	0.000336388	1.9599e-05	0.39441	2.14042e-05	0.00598629	6.36455e-05	1.91554e-05	6.2733e-05	7.98007e-06	3.36235e-05	0.00114002	4.02592e-05
H19	0.00221996	1.41115e-05	9.57016e-05	0.0109088	0.000262789	0.0186624	0.000127642	0.46583	0.000124636	0.0276883	0.00010366	7.52949e-06	1.36903e-05	0.000603976	2.0482e-05	0.00468813	0.000994061	2.14042e-05	0.382388	8.77547e-05	0.000226547	7.18447e-06	0.00618576	0.00354539	7.18465e-06	6.57242e-05	1.72677e-06
H20	0.000827493	0.0271576	0.00806845	0.000279263	0.00534082	0.000246602	0.0249488	0.00241814	0.459864	0.00646046	0.00027426	0.00019586	0.000145237	0.00349773	0.000402961	0.000177485	6.33677e-05	0.00598629	8.77547e-05	0.370492	0.000156961	1.38889e-05	0.00328677	0.00018082	1.42774e-05	4.1257e-05	6.45396e-06
H21	0.000313281	0.00317914	0.0286319	0.000328603	8.89562e-05	0.00355522	0.00172416	0.00042855	0.00387806	0.00238759	0.4573	0.0182621	0.00632384	5.8913e-06	4.3459e-05	0.00798398	0.000155443	6.36455e-05	0.000226547	0.000156961	0.396886	0.0147108	0.00445499	0.000246744	0.00482794	0.00401811	0.000441984
H22	2.91593e-05	0.0086907	0.0266586	2.0708e-05	2.14602e-05	7.67343e-05	0.000328814	1.53005e-05	0.000501886	5.21981e-05	0.463703	0.018865	0.00879751	9.28183e-07	1.04983e-05	0.000208189	3.69953e-06	1.91554e-05	7.18447e-06	1.38889e-05	0.0147108	0.394717	0.000176655	5.76933e-06	0.00152025	0.000490038	0.000793984
H23	0.000702064	0.000583351	0.00640841	0.00046076	0.000182215	0.00557851	0.000793957	0.0296163	0.00354902	0.474571	0.00276405	0.000337359	6.4429e-05	0.000203977	2.79404e-05	0.00300229	0.000440648	6.2733e-05	0.00618576	0.00328677	0.00445499	0.000176655	0.40502	0.0164247	0.000120605	2.78731e-05	4.57546e-06
H24	0.00133038	1.40659e-05	0.000117996	0.000301765	0.000145147	0.00633732	4.86151e-05	0.0300074	0.00016069	0.482952	8.61326e-05	9.01783e-06	1.59937e-06	0.000196054	9.28339e-06	0.000376802	0.000759488	7.98007e-06	0.00354539	0.00018082	0.000246744	5.76933e-06	0.0164247	0.407048	4.29993e-06	1.5762e-06	1.12125e-07
H25	1.84194e-05	0.00055523	0.00591735	8.59014e-06	5.5703e-06	8.59086e-05	7.32475e-05	6.34569e-06	0.000136531	3.83125e-05	0.0197656	0.472782	0.0287903	5.34097e-07	1.11928e-06	0.000235687	3.64546e-06	3.36235e-05	7.18465e-06	1.42774e-05	0.00482794	0.00152025	0.000120605	4.29993e-06	0.408506	0.00663278	0.00357663
H26	0.000617369	0.00151038	0.001317	0.00018095	0.000126295	0.00119142	0.00173393	0.000136151	0.000965747	2.49628e-05	0.00613303	0.0301801	0.478749	4.48749e-05	8.6e-06	0.00258565	5.60883e-05	0.00114002	6.57242e-05	4.1257e-05	0.00401811	0.000490038	2.78731e-05	1.5762e-06	0.00663278	0.414336	0.0166621
H27	1.58496e-05	0.000388002	0.0015337	3.07452e-06	1.3864e-06	3.16494e-05	6.67286e-05	3.01447e-06	4.53026e-05	1.46141e-06	0.00624962	0.0299228	0.48315	4.05142e-07	2.48586e-07	0.000156196	1.78157e-06	4.02592e-05	1.72677e-06	6.45396e-06	0.000441984	0.000793984	4.57546e-06	1.12125e-07	0.00357663	0.0166621	0.407501
LDM — ajoene_e_26_LIDI_matrix
	S1	S2	S3	O4	C5	C6	C7	C8	C9	C10	C11	C12	C13	H14	H15	H16	H17	H18	H19	H20	H21	H22	H23	H24	H25	H26	H27
S1	12.9292	0.00209526	0.00223969	0.686706	0.462819	0.466469	0.0283807	0.0262567	0.0159406	0.0139467	0.000359079	0.000328895	5.83754e-05	0.0225882	0.0190597	0.0227483	0.0227687	0.00204233	0.00418192	0.000675136	3.37737e-05	0.000686481	0.000940587	0.00076974	0.000620233	4.69032e-06	1.10992e-05		92.3	31.7	63.4
S2	0.00209526	14.5669	0.639752	0.000627391	0.00921564	0.000337612	0.0557986	0.00014461	0.573558	0.000616261	0.0383791	0.0084315	0.004781	0.00178618	0.000903344	0.000492402	2.47793e-05	0.0118425	2.16949e-05	0.0286656	0.00272474	0.0108437	2.20337e-05	0.00095118	0.000329617	0.000486537	0.000226459
S3	0.00223969	0.639752	14.6293	0.000497789	0.00183508	0.000443584	0.0214807	0.000383447	0.0471547	0.00394093	0.525529	0.043229	0.0209027	0.000444814	7.44719e-05	0.0013164	4.87587e-05	0.00132939	0.000212906	0.00545901	0.029449	0.0262306	0.000298734	0.0127446	0.00550813	0.00112609	0.00121674
O4	0.686706	0.000627391	0.000497789	8.36731	0.0621369	0.0634978	0.0142427	0.00948019	0.0030536	0.00519086	0.000238333	9.88705e-05	2.67149e-05	0.00372861	0.00823606	0.00556088	0.00547593	0.0109225	0.000753568	0.000443347	2.5148e-05	0.000822833	0.000600221	0.000274135	0.000133308	2.88898e-06	3.53914e-06
C5	0.462819	0.00921564	0.00183508	0.0621369	4.07112	0.0231508	0.517889	0.00701472	0.035967	0.00387752	0.000159763	4.0212e-05	2.95045e-05	0.464169	0.461249	0.00285988	0.00473634	0.0171842	0.000312353	0.0055155	1.51912e-05	0.00020307	0.000103416	0.000208478	4.02569e-05	1.89864e-06	2.0464e-06
C6	0.466469	0.000337612	0.000443584	0.0634978	0.0231508	4.07069	0.00818674	0.520048	0.00404049	0.0369725	0.00177937	0.00181936	0.000224855	0.00495879	0.00192639	0.449091	0.462119	0.000192217	0.019837	0.000202123	0.000160139	0.00362658	0.00630887	0.00552046	0.00320257	2.50916e-05	6.58398e-05
C7	0.0283807	0.0557986	0.0214807	0.0142427	0.517889	0.00818674	3.95511	0.00103857	0.875298	0.00112491	0.00233158	0.000350855	0.000397715	0.0192089	0.0174646	0.00969588	0.000755621	0.459593	0.000148613	0.0257952	0.000216139	0.00443306	5.74247e-05	0.00107353	3.21812e-05	2.75514e-05	1.52765e-05
C8	0.0262567	0.00014461	0.000383447	0.00948019	0.00701472	0.520048	0.00103857	3.98584	0.00120151	0.915171	0.000158445	0.000628306	6.0406e-05	0.000708148	0.00881162	0.0168478	0.0188871	0.000124461	0.474149	0.00149544	3.1758e-05	0.000259514	0.0300627	0.0285388	0.0021969	1.26781e-05	3.45468e-05
C9	0.0159406	0.573558	0.0471547	0.0030536	0.035967	0.00404049	0.875298	0.00120151	4.087	0.00391661	0.0042291	0.000487736	0.000284942	0.00893784	0.00571197	0.00680314	0.000315282	0.0266702	0.000149412	0.463135	0.000577522	0.0046708	0.00018729	0.0048609	9.17787e-05	3.04089e-05	2.60805e-05
C10	0.0139467	0.000616261	0.00394093	0.00519086	0.00387752	0.0369725	0.00112491	0.915171	0.00391661	4.08375	0.000209517	0.00143913	0.000143057	0.000266958	0.0064354	0.00545571	0.0101276	0.000149485	0.0296357	0.0046718	8.55018e-05	7.11385e-05	0.483062	0.469198	0.00464837	2.59021e-05	8.21036e-05
C11	0.000359079	0.0383791	0.525529	0.000238333	0.000159763	0.00177937	0.00233158	0.000158445	0.0042291	0.000209517	4.01425	0.515908	0.0373766	4.80508e-05	1.42582e-05	0.00497132	7.92636e-05	0.000447421	7.70202e-05	0.000330042	0.465583	0.453402	1.02707e-05	0.00053803	0.0191751	0.00632846	0.00631367
C12	0.000328895	0.0084315	0.043229	9.88705e-05	4.0212e-05	0.00181936	0.000350855	0.000628306	0.000487736	0.00143913	0.515908	3.97761	0.920154	1.41933e-05	5.73774e-06	0.00349309	0.000252475	4.97756e-05	6.12666e-05	3.99838e-05	0.0185078	0.0181327	5.25799e-05	0.00202429	0.46723	0.0301533	0.0301745
C13	5.83754e-05	0.004781	0.0209027	2.67149e-05	2.95045e-05	0.000224855	0.000397715	6.0406e-05	0.000284942	0.000143057	0.0373766	0.920154	4.08085	2.20535e-05	1.20848e-06	0.00053272	8.2267e-05	4.77154e-05	4.03748e-06	1.09446e-05	0.00632739	0.00928749	5.13138e-06	0.000235273	0.0287471	0.483413	0.480705
H14	0.0225882	0.00178618	0.000444814	0.00372861	0.464169	0.00495879	0.0192089	0.000708148	0.00893784	0.000266958	4.80508e-05	1.41933e-05	2.20535e-05	0.388699	0.0143041	0.000199443	0.000944048	0.00104411	1.95055e-05	0.000388626	2.73439e-06	4.95148e-05	6.54689e-06	2.83907e-05	1.32543e-05	1.43765e-06	9.6626e-07
H15	0.0190597	0.000903344	7.44719e-05	0.00823606	0.461249	0.00192639	0.0174646	0.00881162	0.00571197	0.0064354	1.42582e-05	5.73774e-06	1.20848e-06	0.0143041	0.384745	0.000100851	0.000222189	0.00463121	0.000314216	0.00368604	1.61141e-06	2.53446e-05	0.000153376	0.00023076	1.70317e-05	1.81965e-07	2.84181e-07
H16	0.0227483	0.000492402	0.0013164	0.00556088	0.00285988	0.449091	0.00969588	0.0168478	0.00680314	0.00545571	0.00497132	0.00349309	0.00053272	0.000199443	0.000100851	0.372106	0.0139687	0.000396285	0.00473754	0.000215112	0.000391057	0.00811313	0.000374882	0.00301099	0.00379454	3.30931e-05	0.000104972
H17	0.0227687	2.47793e-05	4.87587e-05	0.00547593	0.00473634	0.462119	0.000755621	0.0188871	0.000315282	0.0101276	7.92636e-05	0.000252475	8.2267e-05	0.000944048	0.000222189	0.0139687	0.386606	1.67529e-05	0.00125957	4.48283e-05	1.06707e-05	0.000145576	0.000778915	0.000460818	0.000333171	3.56722e-06	7.66244e-06
H18	0.00204233	0.0118425	0.00132939	0.0109225	0.0171842	0.000192217	0.459593	0.000124461	0.0266702	0.000149485	0.000447421	4.97756e-05	4.77154e-05	0.00104411	0.00463121	0.000396285	1.67529e-05	0.366724	1.70904e-05	0.00576596	3.01366e-05	0.000978024	4.08918e-06	7.62665e-05	3.71168e-06	3.77918e-06	1.87626e-06
H19	0.00418192	2.16949e-05	0.000212906	0.000753568	0.000312353	0.019837	0.000148613	0.474149	0.000149412	0.0296357	7.70202e-05	6.12666e-05	4.03748e-06	1.95055e-05	0.000314216	0.00473754	0.00125957	1.70904e-05	0.410417	8.32666e-05	5.33158e-06	0.00014014	0.00370096	0.00632094	0.000123504	1.27884e-06	3.1286e-06
H20	0.000675136	0.0286656	0.00545901	0.000443347	0.0055155	0.000202123	0.0257952	0.00149544	0.463135	0.0046718	0.000330042	3.99838e-05	1.09446e-05	0.000388626	0.00368604	0.000215112	4.48283e-05	0.00576596	8.32666e-05	0.382402	0.00010751	0.000126371	0.000137364	0.00399451	1.92293e-05	1.85323e-06	2.07798e-06
H21	3.37737e-05	0.00272474	0.029449	2.5148e-05	1.51912e-05	0.000160139	0.000216139	3.1758e-05	0.000577522	8.55018e-05	0.465583	0.0185078	0.00632739	2.73439e-06	1.61141e-06	0.000391057	1.06707e-05	3.01366e-05	5.33158e-06	0.00010751	0.396674	0.0143425	3.14654e-06	0.000202564	0.00503048	0.000456876	0.00403502
H22	0.000686481	0.0108437	0.0262306	0.000822833	0.00020307	0.00362658	0.00443306	0.000259514	0.0046708	7.11385e-05	0.453402	0.0181327	0.00928749	4.95148e-05	2.53446e-05	0.00811313	0.000145576	0.000978024	0.00014014	0.000126371	0.0143425	0.378532	2.76698e-06	9.88765e-05	0.00147145	0.000762619	0.000494685
H23	0.000940587	2.20337e-05	0.000298734	0.000600221	0.000103416	0.00630887	5.74247e-05	0.0300627	0.00018729	0.483062	1.02707e-05	5.25799e-05	5.13138e-06	6.54689e-06	0.000153376	0.000374882	0.000778915	4.08918e-06	0.00370096	0.000137364	3.14654e-06	2.76698e-06	0.406993	0.0157404	0.000206866	9.67087e-07	3.32668e-06
H24	0.00076974	0.00095118	0.0127446	0.000274135	0.000208478	0.00552046	0.00107353	0.0285388	0.0048609	0.469198	0.00053803	0.00202429	0.000235273	2.83907e-05	0.00023076	0.00301099	0.000460818	7.62665e-05	0.00632094	0.00399451	0.000202564	9.88765e-05	0.0157404	0.385915	0.00388582	2.56577e-05	9.81391e-05
H25	0.000620233	0.000329617	0.00550813	0.000133308	4.02569e-05	0.00320257	3.21812e-05	0.0021969	9.17787e-05	0.00464837	0.0191751	0.46723	0.0287471	1.32543e-05	1.70317e-05	0.00379454	0.000333171	3.71168e-06	0.000123504	1.92293e-05	0.00503048	0.00147145	0.000206866	0.00388582	0.402847	0.00357408	0.00648472
H26	4.69032e-06	0.000486537	0.00112609	2.88898e-06	1.89864e-06	2.50916e-05	2.75514e-05	1.26781e-05	3.04089e-05	2.59021e-05	0.00632846	0.0301533	0.483413	1.43765e-06	1.81965e-07	3.30931e-05	3.56722e-06	3.77918e-06	1.27884e-06	1.85323e-06	0.000456876	0.000762619	9.67087e-07	2.56577e-05	0.00357408	0.408562	0.0167035
H27	1.10992e-05	0.000226459	0.00121674	3.53914e-06	2.0464e-06	6.58398e-05	1.52765e-05	3.45468e-05	2.60805e-05	8.21036e-05	0.00631367	0.0301745	0.480705	9.6626e-07	2.84181e-07	0.000104972	7.66244e-06	1.87626e-06	3.1286e-06	2.07798e-06	0.00403502	0.000494685	3.32668e-06	9.81391e-05	0.00648472	0.0167035	0.409845
LDM — ajoene_e_27_LIDI_matrix
	S1	S2	S3	O4	C5	C6	C7	C8	C9	C10	C11	C12	C13	H14	H15	H16	H17	H18	H19	H20	H21	H22	H23	H24	H25	H26	H27
S1	12.9486	0.00355591	0.00192506	0.682114	0.455878	0.467116	0.0305342	0.0267935	0.0216508	0.0143592	0.000838889	0.000125873	0.000110038	0.0228159	0.0202712	0.0227685	0.0233706	0.00144241	0.00417588	0.000970782	0.00163022	7.9603e-05	0.000941009	0.000766058	0.00010588	8.59286e-06	7.37878e-06		92.3055	31.6948	63.3897
S2	0.00355591	14.5692	0.640271	0.00175531	0.00923499	0.000321696	0.0616392	6.16646e-05	0.579616	8.52323e-05	0.0374001	0.00951733	0.00521767	0.00111803	0.00145163	4.27389e-05	0.000591809	0.0123776	2.05161e-05	0.0271702	0.00519221	0.0050635	5.46209e-06	0.00012162	0.000483338	0.000480162	0.000252791
S3	0.00192506	0.640271	14.6371	0.00225705	0.00175287	0.000222582	0.0163591	2.30647e-05	0.0441483	1.19528e-05	0.526227	0.0436044	0.0216023	0.000222558	9.28704e-05	3.14874e-05	0.000446383	0.00138232	7.68867e-06	0.0106865	0.0256939	0.0302092	1.33173e-06	1.5378e-05	0.00536939	0.00111447	0.00134617
O4	0.682114	0.00175531	0.00225705	8.33097	0.0609473	0.062154	0.0156125	0.00935065	0.0196286	0.00526002	0.0087585	0.00134536	0.00037117	0.0037587	0.00809842	0.00510582	0.00543266	0.000509421	0.000719957	0.00634624	0.0200444	0.000524447	0.000580866	0.000283253	0.00109973	4.43155e-05	5.98566e-05
C5	0.455878	0.00923499	0.00175287	0.0609473	4.06275	0.0223941	0.522749	0.00752551	0.0357574	0.00437207	0.000184648	3.6907e-05	4.04923e-05	0.464785	0.463513	0.00481863	0.00251953	0.018377	0.000324462	0.00523357	0.00021041	1.415e-05	0.000109144	0.000272136	1.07748e-05	2.38281e-06	1.99719e-06
C6	0.467116	0.000321696	0.000222582	0.062154	0.0223941	4.07006	0.00847827	0.520226	0.00214884	0.0370954	0.000435035	4.10336e-05	1.87213e-05	0.00483836	0.00165451	0.46267	0.455999	0.00232427	0.0197555	0.000182475	0.00150715	6.76368e-05	0.00629404	0.00599102	5.16929e-06	2.9756e-06	1.36198e-06
C7	0.0305342	0.0616392	0.0163591	0.0156125	0.522749	0.00847827	3.95533	0.00128192	0.865861	0.00178165	0.00201504	0.000332828	0.000591502	0.0185463	0.0176615	0.000701546	0.00923782	0.466689	0.000165285	0.0235275	0.00287737	0.000145521	7.09158e-05	0.00189686	2.18053e-05	2.95859e-05	2.20348e-05
C8	0.0267935	6.16646e-05	2.30647e-05	0.00935065	0.00752551	0.520226	0.00128192	3.98179	0.000277581	0.916475	3.92654e-05	3.93698e-06	1.76642e-06	0.000813919	0.0089214	0.0188801	0.0170405	0.0012732	0.473678	5.23052e-05	0.000148189	7.36451e-06	0.0299009	0.0300136	1.73513e-06	3.12211e-07	1.69092e-07
C9	0.0216508	0.579616	0.0441483	0.0196286	0.0357574	0.00214884	0.865861	0.000277581	4.07682	0.000260894	0.00575732	0.000713132	0.000330456	0.00663608	0.00518624	0.00019788	0.00288411	0.0286546	8.56525e-05	0.45885	0.00692187	0.000420257	1.70605e-05	0.000268325	6.56359e-05	4.1498e-05	2.61384e-05
C10	0.0143592	8.52323e-05	1.19528e-05	0.00526002	0.00437207	0.0370954	0.00178165	0.916475	0.000260894	4.07784	1.46704e-05	2.30739e-06	8.75256e-07	0.000293855	0.00665437	0.00986196	0.00568396	0.00380321	0.0296504	8.1231e-05	3.67516e-05	2.61568e-06	0.482746	0.478765	1.06681e-06	1.36917e-07	9.99067e-08
C11	0.000838889	0.0374001	0.526227	0.0087585	0.000184648	0.000435035	0.00201504	3.92654e-05	0.00575732	1.46704e-05	4.02833	0.515199	0.0376991	3.26382e-05	2.98637e-05	3.75559e-05	0.00133554	0.000132876	2.05417e-05	0.000390984	0.444532	0.467369	9.43853e-07	5.00601e-06	0.0191465	0.00641835	0.00634675
C12	0.000125873	0.00951733	0.0436044	0.00134536	3.6907e-05	4.10336e-05	0.000332828	3.93698e-06	0.000713132	2.30739e-06	0.515199	3.97458	0.920374	4.21474e-06	5.4314e-06	8.87465e-06	0.000136855	1.85873e-05	1.61716e-06	4.48714e-05	0.0175081	0.0184775	1.70621e-07	6.76848e-07	0.471741	0.0302915	0.0304222
C13	0.000110038	0.00521767	0.0216023	0.00037117	4.04923e-05	1.87213e-05	0.000591502	1.76642e-06	0.000330456	8.75256e-07	0.0376991	0.920374	4.08533	9.22428e-06	9.6371e-06	3.408e-06	7.42296e-05	1.90672e-05	1.201e-06	1.43702e-05	0.00794674	0.00644422	1.26996e-07	5.0337e-07	0.0289164	0.484187	0.481673
H14	0.0228159	0.00111803	0.000222558	0.0037587	0.464785	0.00483836	0.0185463	0.000813919	0.00663608	0.000293855	3.26382e-05	4.21474e-06	9.22428e-06	0.389559	0.0144883	0.000935586	0.000195937	0.00376589	2.02518e-05	0.00248302	2.38321e-05	3.65936e-06	5.64848e-06	3.97827e-05	7.21301e-07	4.61771e-07	3.37102e-07
H15	0.0202712	0.00145163	9.28704e-05	0.00809842	0.463513	0.00165451	0.0176615	0.0089214	0.00518624	0.00665437	2.98637e-05	5.4314e-06	9.6371e-06	0.0144883	0.385891	0.000195783	0.000106017	0.00231799	0.000357091	0.000348106	3.28883e-05	1.98213e-06	0.000160562	0.000229477	3.35099e-06	5.38676e-07	5.28554e-07
H16	0.0227685	4.27389e-05	3.14874e-05	0.00510582	0.00481863	0.46267	0.000701546	0.0188801	0.00019788	0.00986196	3.75559e-05	8.87465e-06	3.408e-06	0.000935586	0.000195783	0.386735	0.0141545	0.000206928	0.00132702	1.24707e-05	0.000104657	4.11808e-06	0.000779959	0.000488754	6.82345e-07	2.79056e-07	1.75118e-07
H17	0.0233706	0.000591809	0.000446383	0.00543266	0.00251953	0.455999	0.00923782	0.0170405	0.00288411	0.00568396	0.00133554	0.000136855	7.42296e-05	0.000195937	0.000106017	0.0141545	0.378115	0.00353724	0.00492379	9.61487e-05	0.00234079	0.00016799	0.000401914	0.00342233	7.07599e-06	8.27844e-06	3.44736e-06
H18	0.00144241	0.0123776	0.00138232	0.000509421	0.018377	0.00232427	0.466689	0.0012732	0.0286546	0.00380321	0.000132876	1.85873e-05	1.90672e-05	0.00376589	0.00231799	0.000206928	0.00353724	0.399956	0.000136996	0.00586841	0.000110224	2.64197e-05	0.00023506	0.00382918	2.93689e-06	9.88071e-07	9.37401e-07
H19	0.00417588	2.05161e-05	7.68867e-06	0.000719957	0.000324462	0.0197555	0.000165285	0.473678	8.56525e-05	0.0296504	2.05417e-05	1.61716e-06	1.201e-06	2.02518e-05	0.000357091	0.00132702	0.00492379	0.000136996	0.408674	6.66085e-06	6.20829e-05	5.15457e-06	0.00367793	0.00670612	1.80125e-07	1.50569e-07	6.63021e-08
H20	0.000970782	0.0271702	0.0106865	0.00634624	0.00523357	0.000182475	0.0235275	5.23052e-05	0.45885	8.1231e-05	0.000390984	4.48714e-05	1.43702e-05	0.00248302	0.000348106	1.24707e-05	9.61487e-05	0.00586841	6.66085e-06	0.364117	0.000324103	0.000138972	3.61342e-06	9.81936e-05	2.06259e-05	1.27781e-06	3.25498e-06
H21	0.00163022	0.00519221	0.0256939	0.0200444	0.00021041	0.00150715	0.00287737	0.000148189	0.00692187	3.67516e-05	0.444532	0.0175081	0.00794674	2.38321e-05	3.28883e-05	0.000104657	0.00234079	0.000110224	6.20829e-05	0.000324103	0.346337	0.0137521	2.27748e-06	9.57932e-06	0.00168959	0.000725498	0.000488313
H22	7.9603e-05	0.0050635	0.0302092	0.000524447	1.415e-05	6.76368e-05	0.000145521	7.36451e-06	0.000420257	2.61568e-06	0.467369	0.0184775	0.00644422	3.65936e-06	1.98213e-06	4.11808e-06	0.00016799	2.64197e-05	5.15457e-06	0.000138972	0.0137521	0.405944	1.54888e-07	2.27354e-06	0.00492963	0.000463858	0.00392126
H23	0.000941009	5.46209e-06	1.33173e-06	0.000580866	0.000109144	0.00629404	7.09158e-05	0.0299009	1.70605e-05	0.482746	9.43853e-07	1.70621e-07	1.26996e-07	5.64848e-06	0.000160562	0.000779959	0.000401914	0.00023506	0.00367793	3.61342e-06	2.27748e-06	1.54888e-07	0.405218	0.0164962	7.55045e-08	1.19005e-08	8.96552e-09
H24	0.000766058	0.00012162	1.5378e-05	0.000283253	0.000272136	0.00599102	0.00189686	0.0300136	0.000268325	0.478765	5.00601e-06	6.76848e-07	5.0337e-07	3.97827e-05	0.000229477	0.000488754	0.00342233	0.00382918	0.00670612	9.81936e-05	9.57932e-06	2.27354e-06	0.0164962	0.408153	1.49839e-07	3.20391e-08	3.11902e-08
H25	0.00010588	0.000483338	0.00536939	0.00109973	1.07748e-05	5.16929e-06	2.18053e-05	1.73513e-06	6.56359e-05	1.06681e-06	0.0191465	0.471741	0.0289164	7.21301e-07	3.35099e-06	6.82345e-07	7.07599e-06	2.93689e-06	1.80125e-07	2.06259e-05	0.00168959	0.00492963	7.55045e-08	1.49839e-07	0.401123	0.00359847	0.00672615
H26	8.59286e-06	0.000480162	0.00111447	4.43155e-05	2.38281e-06	2.9756e-06	2.95859e-05	3.12211e-07	4.1498e-05	1.36917e-07	0.00641835	0.0302915	0.484187	4.61771e-07	5.38676e-07	2.79056e-07	8.27844e-06	9.88071e-07	1.50569e-07	1.27781e-06	0.000725498	0.000463858	1.19005e-08	3.20391e-08	0.00359847	0.411968	0.0170174
H27	7.37878e-06	0.000252791	0.00134617	5.98566e-05	1.99719e-06	1.36198e-06	2.20348e-05	1.69092e-07	2.61384e-05	9.99067e-08	0.00634675	0.0304222	0.481673	3.37102e-07	5.28554e-07	1.75118e-07	3.44736e-06	9.37401e-07	6.63021e-08	3.25498e-06	0.000488313	0.00392126	8.96552e-09	3.11902e-08	0.00672615	0.0170174	0.414988
LDM — ajoene_e_28_LIDI_matrix
	S1	S2	S3	O4	C5	C6	C7	C8	C9	C10	C11	C12	C13	H14	H15	H16	H17	H18	H19	H20	H21	H22	H23	H24	H25	H26	H27
S1	12.9468	0.00301395	0.00214708	0.677514	0.45543	0.467826	0.0296467	0.0312463	0.021067	0.0175181	0.000880093	9.06723e-05	0.000415466	0.0225133	0.0208186	0.0236313	0.0206689	0.00151744	0.00164562	0.000971821	0.00162451	0.000123372	0.000783402	0.000988829	5.38776e-05	0.000842227	3.99249e-05		92.2865	31.7134	63.4267
S2	0.00301395	14.576	0.638523	0.00170901	0.00918497	0.000312019	0.0594518	6.65159e-05	0.576454	0.000112433	0.0375598	0.00971115	0.00511769	0.00109995	0.00145121	0.000610845	3.29249e-05	0.0132496	4.45579e-05	0.0271659	0.00366979	0.00764351	5.61107e-06	6.01024e-06	0.000377772	0.000215662	0.000468507
S3	0.00214708	0.638523	14.6412	0.00275618	0.00176001	0.000402038	0.0180937	0.00014369	0.0450526	6.59965e-05	0.525748	0.0406912	0.0213623	0.000262671	8.75793e-05	0.000749935	3.50838e-05	0.00143265	0.000371386	0.00916935	0.0259733	0.0302957	6.43038e-06	5.03454e-06	0.00404657	0.00108836	0.00113104
O4	0.677514	0.00170901	0.00275618	8.31238	0.0608324	0.0602318	0.0144833	0.0116504	0.0191823	0.00327604	0.00983262	0.000942553	0.00626776	0.00394033	0.00824111	0.00403152	0.0083734	0.000545834	0.0065116	0.00731055	0.0221545	0.000592143	0.00038227	0.000181499	0.000459333	0.0137108	0.00053513
C5	0.45543	0.00918497	0.00176001	0.0608324	4.06284	0.0232803	0.522533	0.00483418	0.0354072	0.00192014	0.000206567	3.18869e-05	0.000105959	0.46419	0.469553	0.00334081	0.00263857	0.0186347	0.00020714	0.00495415	0.000256075	1.71831e-05	0.000104949	0.000238859	9.01495e-06	0.000225865	1.05121e-05
C6	0.467826	0.000312019	0.000402038	0.0602318	0.0232803	4.06918	0.0091114	0.516573	0.00240362	0.038473	0.00121853	0.00013097	0.000170322	0.00454321	0.00276957	0.453474	0.466605	0.00268182	0.0185598	0.000202289	0.00282218	0.000264722	0.00637082	0.00642009	3.30754e-05	0.000147414	4.96806e-06
C7	0.0296467	0.0594518	0.0180937	0.0144833	0.522533	0.0091114	3.95738	0.000897075	0.866036	0.000409932	0.00261278	0.000382381	0.000434486	0.0184723	0.0182458	0.0119777	0.000454942	0.468232	3.73049e-05	0.0235757	0.00400799	0.000185176	2.37742e-05	5.44712e-05	0.000112706	3.3549e-05	2.88157e-05
C8	0.0312463	6.65159e-05	0.00014369	0.0116504	0.00483418	0.516573	0.000897075	3.98208	0.000280782	0.922763	0.000667848	0.000724732	0.00159655	0.000986897	0.000321071	0.0180967	0.0178847	0.000315878	0.464294	2.33298e-05	0.00118241	0.000107002	0.030727	0.0300514	2.9471e-05	0.00104711	2.42511e-05
C9	0.021067	0.576454	0.0450526	0.0191823	0.0354072	0.00240362	0.866036	0.000280782	4.0732	0.000602705	0.00671806	0.00082428	0.000203816	0.00661022	0.00511033	0.00335526	0.000183028	0.028728	2.28379e-05	0.458752	0.00763621	0.000474517	2.43427e-05	2.74265e-05	0.000213891	4.64504e-05	1.71315e-05
C10	0.0175181	0.000112433	6.59965e-05	0.00327604	0.00192014	0.038473	0.000409932	0.922763	0.000602705	4.07945	0.00010429	8.20532e-05	0.000150842	0.000575815	6.66069e-05	0.00878283	0.00638211	0.000153008	0.0275775	1.86856e-05	0.000168435	2.49022e-05	0.48179	0.482864	5.43409e-06	0.000126877	3.54994e-06
C11	0.000880093	0.0375598	0.525748	0.00983262	0.000206567	0.00121853	0.00261278	0.000667848	0.00671806	0.00010429	4.02561	0.5156	0.0374528	3.94747e-05	2.88566e-05	0.00288035	8.58256e-05	0.000196849	0.00138474	0.000356477	0.441337	0.466749	2.85445e-05	9.97645e-06	0.0200014	0.00547712	0.00635975
C12	9.06723e-05	0.00971115	0.0406912	0.000942553	3.18869e-05	0.00013097	0.000382381	0.000724732	0.00082428	8.20532e-05	0.5156	3.98399	0.918661	5.41342e-06	3.52236e-06	0.000253232	3.27083e-05	2.38941e-05	0.00276016	3.99664e-05	0.0165085	0.0191366	3.80945e-05	1.75576e-05	0.475781	0.0283183	0.0305677
C13	0.000415466	0.00511769	0.0213623	0.00626776	0.000105959	0.000170322	0.000434486	0.00159655	0.000203816	0.000150842	0.0374528	0.918661	4.08967	1.12091e-05	2.8545e-05	6.30462e-05	6.0704e-05	1.83483e-05	0.00514813	1.63079e-05	0.00591588	0.00846586	7.57765e-05	2.93774e-05	0.0298906	0.468529	0.484734
H14	0.0225133	0.00109995	0.000262671	0.00394033	0.46419	0.00454321	0.0184723	0.000986897	0.00661022	0.000575815	3.94747e-05	5.41342e-06	1.12091e-05	0.386249	0.0150256	0.000234283	0.000242897	0.00362499	1.87369e-05	0.00220634	3.19606e-05	3.91096e-06	2.70593e-05	6.47464e-05	1.74372e-06	6.76603e-06	6.221e-07
H15	0.0208186	0.00145121	8.75793e-05	0.00824111	0.469553	0.00276957	0.0182458	0.000321071	0.00511033	6.66069e-05	2.88566e-05	3.52236e-06	2.8545e-05	0.0150256	0.401619	0.00014028	0.00201688	0.00248929	8.65512e-05	0.000345935	3.57096e-05	2.09269e-06	1.08832e-05	7.46114e-06	7.6236e-07	5.05594e-05	3.71248e-06
H16	0.0236313	0.000610845	0.000749935	0.00403152	0.00334081	0.453474	0.0119777	0.0180967	0.00335526	0.00878283	0.00288035	0.000253232	6.30462e-05	0.000234283	0.00014028	0.374907	0.0142316	0.00471299	0.00133914	0.000128471	0.00407805	0.000634257	0.000452537	0.000717395	6.10665e-05	1.75616e-05	4.17331e-06
H17	0.0206689	3.29249e-05	3.50838e-05	0.0083734	0.00263857	0.466605	0.000454942	0.0178847	0.000183028	0.00638211	8.58256e-05	3.27083e-05	6.0704e-05	0.000242897	0.00201688	0.0142316	0.403617	0.000182541	0.00483669	2.29884e-05	0.000227075	1.55796e-05	0.00399133	0.000467905	3.48768e-06	3.91075e-05	6.92394e-07
H18	0.00151744	0.0132496	0.00143265	0.000545834	0.0186347	0.00268182	0.468232	0.000315878	0.028728	0.000153008	0.000196849	2.38941e-05	1.83483e-05	0.00362499	0.00248929	0.00471299	0.000182541	0.400301	1.23708e-05	0.00595726	0.000159433	7.01203e-05	6.81442e-06	1.79707e-05	4.04954e-06	1.59879e-06	1.21952e-06
H19	0.00164562	4.45579e-05	0.000371386	0.0065116	0.00020714	0.0185598	3.73049e-05	0.464294	2.28379e-05	0.0275775	0.00138474	0.00276016	0.00514813	1.87369e-05	8.65512e-05	0.00133914	0.00483669	1.23708e-05	0.381844	4.78892e-06	0.00153474	0.00012554	0.00637313	0.00349705	0.000104482	0.00241654	0.000155851
H20	0.000971821	0.0271659	0.00916935	0.00731055	0.00495415	0.000202289	0.0235757	2.33298e-05	0.458752	1.86856e-05	0.000356477	3.99664e-05	1.63079e-05	0.00220634	0.000345935	0.000128471	2.29884e-05	0.00595726	4.78892e-06	0.361986	0.000311729	0.000144477	1.14912e-06	1.25939e-06	7.18122e-06	7.12162e-06	1.15845e-06
H21	0.00162451	0.00366979	0.0259733	0.0221545	0.000256075	0.00282218	0.00400799	0.00118241	0.00763621	0.000168435	0.441337	0.0165085	0.00591588	3.19606e-05	3.57096e-05	0.00407805	0.000227075	0.000159433	0.00153474	0.000311729	0.346872	0.0138138	4.74375e-05	1.23371e-05	0.00425662	0.00278132	0.000392124
H22	0.000123372	0.00764351	0.0302957	0.000592143	1.71831e-05	0.000264722	0.000185176	0.000107002	0.000474517	2.49022e-05	0.466749	0.0191366	0.00846586	3.91096e-06	2.09269e-06	0.000634257	1.55796e-05	7.01203e-05	0.00012554	0.000144477	0.0138138	0.404177	3.4142e-06	2.47012e-06	0.00169624	0.000451012	0.000838338
H23	0.000783402	5.61107e-06	6.43038e-06	0.00038227	0.000104949	0.00637082	2.37742e-05	0.030727	2.43427e-05	0.48179	2.85445e-05	3.80945e-05	7.57765e-05	2.70593e-05	1.08832e-05	0.000452537	0.00399133	6.81442e-06	0.00637313	1.14912e-06	4.74375e-05	3.4142e-06	0.415974	0.0168234	1.76569e-06	4.88593e-05	1.22858e-06
H24	0.000988829	6.01024e-06	5.03454e-06	0.000181499	0.000238859	0.00642009	5.44712e-05	0.0300514	2.74265e-05	0.482864	9.97645e-06	1.75576e-05	2.93774e-05	6.47464e-05	7.46114e-06	0.000717395	0.000467905	1.79707e-05	0.00349705	1.25939e-06	1.23371e-05	2.47012e-06	0.0168234	0.405942	8.44618e-07	1.48435e-05	6.23813e-07
H25	5.38776e-05	0.000377772	0.00404657	0.000459333	9.01495e-06	3.30754e-05	0.000112706	2.9471e-05	0.000213891	5.43409e-06	0.0200014	0.475781	0.0298906	1.74372e-06	7.6236e-07	6.10665e-05	3.48768e-06	4.04954e-06	0.000104482	7.18122e-06	0.00425662	0.00169624	1.76569e-06	8.44618e-07	0.416564	0.00624547	0.00362928
H26	0.000842227	0.000215662	0.00108836	0.0137108	0.000225865	0.000147414	3.3549e-05	0.00104711	4.64504e-05	0.000126877	0.00547712	0.0283183	0.468529	6.76603e-06	5.05594e-05	1.75616e-05	3.91075e-05	1.59879e-06	0.00241654	7.12162e-06	0.00278132	0.000451012	4.88593e-05	1.48435e-05	0.00624547	0.371368	0.0156269
H27	3.99249e-05	0.000468507	0.00113104	0.00053513	1.05121e-05	4.96806e-06	2.88157e-05	2.42511e-05	1.71315e-05	3.54994e-06	0.00635975	0.0305677	0.484734	6.221e-07	3.71248e-06	4.17331e-06	6.92394e-07	1.21952e-06	0.000155851	1.15845e-06	0.000392124	0.000838338	1.22858e-06	6.23813e-07	0.00362928	0.0156269	0.415251
LDM — ajoene_e_29_LIDI_matrix
	S1	S2	S3	O4	C5	C6	C7	C8	C9	C10	C11	C12	C13	H14	H15	H16	H17	H18	H19	H20	H21	H22	H23	H24	H25	H26	H27
S1	12.9157	0.0031397	0.000845372	0.685363	0.46081	0.463506	0.0301213	0.0279103	0.0186886	0.0164333	0.00023352	0.001975	0.00440068	0.0240169	0.0222102	0.0231335	0.0183512	0.00141362	0.0023198	0.00156162	3.56793e-05	7.05598e-05	0.000739082	0.00133751	0.000844313	0.0045771	0.000244935		92.2752	31.7247	63.4494
S2	0.0031397	14.5312	0.653459	0.00130695	0.00945432	0.000354612	0.064517	9.56006e-05	0.578077	0.000108074	0.0386573	0.00898733	0.00542948	0.00153639	0.00109077	2.10182e-05	0.00044414	0.011335	1.79532e-05	0.0272761	0.00667376	0.00848394	0.000132443	7.03133e-06	0.000538677	0.00022377	0.00127819
S3	0.000845372	0.653459	14.6309	0.00053555	0.00175893	0.000191591	0.0122491	3.31588e-05	0.0416424	1.06049e-05	0.529785	0.0390776	0.0198732	0.000112181	0.000156122	1.36444e-05	0.000268771	0.0012835	8.75774e-06	0.0115453	0.0291063	0.0270827	1.60585e-05	9.66953e-07	0.00707924	0.00144452	0.00126187
O4	0.685363	0.00130695	0.00053555	8.37127	0.0622777	0.0621964	0.0101361	0.0120917	0.00631931	0.0031568	6.67263e-05	0.000258659	0.000558082	0.00675518	0.00391946	0.00458213	0.00822569	0.000614487	0.0109101	0.000449194	8.3297e-06	3.54262e-05	0.000529452	0.000324179	0.000126412	0.000558733	6.49505e-05
C5	0.46081	0.00945432	0.00175893	0.0622777	4.06417	0.0228808	0.519709	0.00926548	0.0364962	0.00413528	0.000132654	0.000146863	0.000267938	0.457706	0.465271	0.00502917	0.00132812	0.0178986	0.000392467	0.00546803	1.01272e-05	4.74978e-05	0.000261477	0.000142841	6.58982e-05	0.000300145	1.35265e-05
C6	0.463506	0.000354612	0.000191591	0.0621964	0.0228808	4.07074	0.00853093	0.517728	0.00226948	0.0370547	8.77614e-05	0.000976642	0.00425135	0.00233452	0.0049772	0.463103	0.457091	0.00280725	0.0185977	0.000143096	3.39263e-06	1.49261e-05	0.00609715	0.00633451	8.85233e-05	0.00349855	0.000459765
C7	0.0301213	0.064517	0.0122491	0.0101361	0.519709	0.00853093	3.95615	0.00232523	0.875024	0.00287178	0.00165954	0.00256626	0.00341099	0.0175975	0.0183162	0.000787515	0.00829963	0.463866	0.000154134	0.0245737	0.000151335	0.000604329	0.00142525	7.0049e-05	0.000159585	0.000134845	0.000143775
C8	0.0279103	9.56006e-05	3.31588e-05	0.0120917	0.00926548	0.517728	0.00232523	3.97623	0.000485646	0.915426	9.55631e-06	0.00011022	0.000358159	0.00975391	0.0008487	0.019162	0.0168827	0.00303454	0.465719	9.3686e-05	4.8536e-07	1.23725e-06	0.0304812	0.029935	1.89426e-05	0.000438539	4.22204e-05
C9	0.0186886	0.578077	0.0416424	0.00631931	0.0364962	0.00226948	0.875024	0.000485646	4.09242	0.000340784	0.00217904	0.00813552	0.00609084	0.00587823	0.00669145	0.000110733	0.00251086	0.0285342	7.49239e-05	0.463225	0.000303202	0.000417611	0.000171434	1.71472e-05	0.00100626	0.000201467	0.000184819
C10	0.0164333	0.000108074	1.06049e-05	0.0031568	0.00413528	0.0370547	0.00287178	0.915426	0.000340784	4.08362	2.17968e-06	1.29776e-05	4.66998e-05	0.00593952	0.00030488	0.0102819	0.00561318	0.00631328	0.0277616	0.000136962	3.02295e-07	6.43905e-07	0.480558	0.483157	8.27262e-06	9.65183e-05	1.43848e-05
C11	0.00023352	0.0386573	0.529785	6.67263e-05	0.000132654	8.77614e-05	0.00165954	9.55631e-06	0.00217904	2.17968e-06	4.01401	0.51654	0.0366641	2.35148e-05	2.92807e-05	3.40627e-05	0.000128913	9.63273e-05	2.88969e-06	0.000324994	0.463428	0.462551	2.21316e-06	2.69231e-07	0.0196709	0.00616415	0.00629635
C12	0.001975	0.00898733	0.0390776	0.000258659	0.000146863	0.000976642	0.00256626	0.00011022	0.00813552	1.29776e-05	0.51654	3.96514	0.913145	4.23903e-05	1.41498e-05	9.42777e-05	0.00229744	8.1372e-05	5.14975e-05	0.000946304	0.0183702	0.019449	6.54581e-06	1.963e-06	0.471452	0.0296484	0.0301568
C13	0.00440068	0.00542948	0.0198732	0.000558082	0.000267938	0.00425135	0.00341099	0.000358159	0.00609084	4.66998e-05	0.0366641	0.913145	4.07476	6.40927e-05	2.66248e-05	0.000677137	0.00804634	0.000171008	0.000141661	0.000232856	0.0062724	0.00994861	3.07268e-05	4.40299e-06	0.0286422	0.478495	0.480167
H14	0.0240169	0.00153639	0.000112181	0.00675518	0.457706	0.00233452	0.0175975	0.00975391	0.00587823	0.00593952	2.35148e-05	4.23903e-05	6.40927e-05	0.373954	0.0142639	0.000184802	9.70411e-05	0.00228436	0.0008775	0.000378847	1.65183e-06	4.50903e-06	0.000162983	0.00017619	1.77434e-05	6.85063e-05	2.66418e-06
H15	0.0222102	0.00109077	0.000156122	0.00391946	0.465271	0.0049772	0.0183162	0.0008487	0.00669145	0.00030488	2.92807e-05	1.41498e-05	2.66248e-05	0.0142639	0.392319	0.000941056	0.000174466	0.00386987	2.8544e-05	0.0026596	3.86908e-06	7.64595e-06	4.74825e-05	8.98526e-06	3.71602e-06	8.37053e-06	1.87255e-06
H16	0.0231335	2.10182e-05	1.36444e-05	0.00458213	0.00502917	0.463103	0.000787515	0.019162	0.000110733	0.0102819	3.40627e-05	9.42777e-05	0.000677137	0.000184802	0.000941056	0.391571	0.0143137	0.000246591	0.000971313	8.19142e-06	9.01853e-07	2.66851e-06	0.000470439	0.000757998	1.02092e-05	0.00124242	4.92799e-05
H17	0.0183512	0.00044414	0.000268771	0.00822569	0.00132812	0.457091	0.00829963	0.0168827	0.00251086	0.00561318	0.000128913	0.00229744	0.00804634	9.70411e-05	0.000174466	0.0143137	0.383163	0.00350392	0.00469186	9.31406e-05	7.18861e-06	4.86266e-05	0.00351341	0.000412801	8.6371e-05	0.00290761	0.00125625
H18	0.00141362	0.011335	0.0012835	0.000614487	0.0178986	0.00280725	0.463866	0.00303454	0.0285342	0.00631328	9.63273e-05	8.1372e-05	0.000171008	0.00228436	0.00386987	0.000246591	0.00350392	0.39381	0.000148374	0.00598035	2.12056e-05	2.14266e-05	0.0033549	0.000254322	1.84648e-05	9.44397e-06	2.17185e-05
H19	0.0023198	1.79532e-05	8.75774e-06	0.0109101	0.000392467	0.0185977	0.000154134	0.465719	7.49239e-05	0.0277616	2.88969e-06	5.14975e-05	0.000141661	0.0008775	2.8544e-05	0.000971313	0.00469186	0.000148374	0.383082	4.8304e-06	9.75344e-08	8.42061e-07	0.00647077	0.00351915	2.30803e-06	7.15898e-05	2.854e-05
H20	0.00156162	0.0272761	0.0115453	0.000449194	0.00546803	0.000143096	0.0245737	9.3686e-05	0.463225	0.000136962	0.000324994	0.000946304	0.000232856	0.000378847	0.0026596	8.19142e-06	9.31406e-05	0.00598035	4.8304e-06	0.375852	0.000181786	1.67765e-05	7.83248e-05	5.15823e-06	0.000551867	1.50251e-05	2.64367e-05
H21	3.56793e-05	0.00667376	0.0291063	8.3297e-06	1.01272e-05	3.39263e-06	0.000151335	4.8536e-07	0.000303202	3.02295e-07	0.463428	0.0183702	0.0062724	1.65183e-06	3.86908e-06	9.01853e-07	7.18861e-06	2.12056e-05	9.75344e-08	0.000181786	0.393169	0.0144463	5.97913e-07	2.16033e-08	0.00517587	0.000457918	0.00423994
H22	7.05598e-05	0.00848394	0.0270827	3.54262e-05	4.74978e-05	1.49261e-05	0.000604329	1.23725e-06	0.000417611	6.43905e-07	0.462551	0.019449	0.00994861	4.50903e-06	7.64595e-06	2.66851e-06	4.86266e-05	2.14266e-05	8.42061e-07	1.67765e-05	0.0144463	0.39416	2.75575e-07	4.92837e-08	0.00122563	0.000780849	0.000489391
H23	0.000739082	0.000132443	1.60585e-05	0.000529452	0.000261477	0.00609715	0.00142525	0.0304812	0.000171434	0.480558	2.21316e-06	6.54581e-06	3.07268e-05	0.000162983	4.74825e-05	0.000470439	0.00351341	0.0033549	0.00647077	7.83248e-05	5.97913e-07	2.75575e-07	0.416303	0.0169096	1.73873e-06	1.12588e-05	1.88016e-05
H24	0.00133751	7.03133e-06	9.66953e-07	0.000324179	0.000142841	0.00633451	7.0049e-05	0.029935	1.71472e-05	0.483157	2.69231e-07	1.963e-06	4.40299e-06	0.00017619	8.98526e-06	0.000757998	0.000412801	0.000254322	0.00351915	5.15823e-06	2.16033e-08	4.92837e-08	0.0169096	0.407622	1.29871e-06	1.26217e-05	1.63555e-06
H25	0.000844313	0.000538677	0.00707924	0.000126412	6.58982e-05	8.85233e-05	0.000159585	1.89426e-05	0.00100626	8.27262e-06	0.0196709	0.471452	0.0286422	1.77434e-05	3.71602e-06	1.02092e-05	8.6371e-05	1.84648e-05	2.30803e-06	0.000551867	0.00517587	0.00122563	1.73873e-06	1.29871e-06	0.407178	0.00362095	0.00672622
H26	0.0045771	0.00022377	0.00144452	0.000558733	0.000300145	0.00349855	0.000134845	0.000438539	0.000201467	9.65183e-05	0.00616415	0.0296484	0.478495	6.85063e-05	8.37053e-06	0.00124242	0.00290761	9.44397e-06	7.15898e-05	1.50251e-05	0.000457918	0.000780849	1.12588e-05	1.26217e-05	0.00362095	0.40398	0.0167507
H27	0.000244935	0.00127819	0.00126187	6.49505e-05	1.35265e-05	0.000459765	0.000143775	4.22204e-05	0.000184819	1.43848e-05	0.00629635	0.0301568	0.480167	2.66418e-06	1.87255e-06	4.92799e-05	0.00125625	2.17185e-05	2.854e-05	2.64367e-05	0.00423994	0.000489391	1.88016e-05	1.63555e-06	0.00672622	0.0167507	0.41273
LDM — ajoene_e_30_LIDI_matrix
	S1	S2	S3	O4	C5	C6	C7	C8	C9	C10	C11	C12	C13	H14	H15	H16	H17	H18	H19	H20	H21	H22	H23	H24	H25	H26	H27
S1	12.9199	0.00304634	0.00106011	0.685607	0.464198	0.462654	0.0277303	0.0288733	0.0140543	0.0200739	0.000162169	0.000366971	9.79255e-05	0.0189893	0.0229829	0.0237548	0.0223054	0.00251349	0.00124133	0.000661309	9.39364e-05	1.45926e-05	0.00140811	0.000902656	0.000818562	1.29001e-05	0.0001831		92.2733	31.7244	63.4488
S2	0.00304634	14.5299	0.654388	0.000790671	0.00947815	0.000493062	0.0649328	0.000176415	0.577577	4.61194e-05	0.0381849	0.00648957	0.00160419	0.000859847	0.00227591	0.000491069	3.96898e-05	0.010413	0.00049797	0.0274674	0.00807177	0.00793081	1.3301e-05	6.49091e-06	0.00599715	0.000328874	0.000162161
S3	0.00106011	0.654388	14.6335	0.0002204	0.00175448	0.000101995	0.0121939	0.00012096	0.0418885	4.09353e-05	0.528341	0.0412575	0.0218112	9.48373e-05	0.000186882	0.000109812	1.23215e-05	0.00120281	0.000375162	0.0113819	0.025791	0.0299968	7.47345e-06	8.25722e-06	0.00258334	0.000991341	0.0014198
O4	0.685607	0.000790671	0.0002204	8.36817	0.0624312	0.0632541	0.0122862	0.0101572	0.00279594	0.00668478	3.1988e-05	7.08206e-05	3.38874e-05	0.00845786	0.00456464	0.00787288	0.00388119	0.0115538	0.000516172	0.000537006	1.82958e-05	6.97151e-06	0.000455281	0.000522875	0.000148598	2.60554e-06	7.28028e-05
C5	0.464198	0.00947815	0.00175448	0.0624312	4.06446	0.0230065	0.517116	0.00824718	0.0365368	0.00237707	0.000130379	8.98817e-05	5.21929e-05	0.462396	0.461982	0.00220418	0.00503847	0.0173272	0.00285696	0.00569453	5.03669e-05	1.1504e-05	0.00015341	7.52476e-05	0.000159393	5.42076e-06	1.80875e-05
C6	0.462654	0.000493062	0.000101995	0.0632541	0.0230065	4.07048	0.00918182	0.519537	0.00314999	0.0373455	0.000166996	0.00151438	0.000382459	0.0013794	0.0049911	0.454986	0.464757	0.000497679	0.0186022	0.000210995	4.71375e-05	9.33548e-06	0.00604023	0.00634826	0.00438968	4.27565e-05	0.000512359
C7	0.0277303	0.0649328	0.0121939	0.0122862	0.517116	0.00918182	3.96057	0.00243684	0.87595	0.000524545	0.00172661	0.00133387	0.000636442	0.0176965	0.0191409	0.00869226	0.0008461	0.460517	0.00296549	0.0252108	0.000689512	0.000179339	9.92931e-05	3.67793e-05	0.0032416	9.0497e-05	3.57166e-05
C8	0.0288733	0.000176415	0.00012096	0.0101572	0.00824718	0.519537	0.00243684	3.97635	0.0024542	0.91211	0.000225576	0.00314232	0.00541093	0.00826219	0.000766147	0.0172284	0.0182603	0.000153183	0.462433	0.00107019	5.55988e-05	1.9092e-05	0.0298143	0.0298983	0.00310502	0.000360166	0.00816516
C9	0.0140543	0.577577	0.0418885	0.00279594	0.0365368	0.00314999	0.87595	0.0024542	4.09783	0.000290305	0.00205847	0.00527395	0.000959822	0.00585215	0.00970826	0.00383011	0.000236998	0.0272358	0.00545114	0.462701	0.000434188	0.000324242	0.000121902	4.14406e-05	0.00811662	0.000170608	8.13314e-05
C10	0.0200739	4.61194e-05	4.09353e-05	0.00668478	0.00237707	0.0373455	0.000524545	0.91211	0.000290305	4.08338	6.67676e-05	0.000526327	0.00197216	0.00289554	0.000124924	0.00682669	0.00695447	8.26159e-05	0.02791	0.000131853	1.39517e-05	5.18344e-06	0.480911	0.483125	0.000473933	0.00017201	0.0050113
C11	0.000162169	0.0381849	0.528341	3.1988e-05	0.000130379	0.000166996	0.00172661	0.000225576	0.00205847	6.67676e-05	4.01355	0.516313	0.0366325	6.27473e-06	7.10809e-05	0.00036223	6.78243e-06	9.05543e-05	0.000288918	0.000319824	0.463827	0.463217	5.71733e-06	7.97645e-06	0.018622	0.00623411	0.00616913
C12	0.000366971	0.00648957	0.0412575	7.08206e-05	8.98817e-05	0.00151438	0.00133387	0.00314232	0.00527395	0.000526327	0.516313	3.97125	0.919817	1.30557e-05	3.98558e-05	0.003398	8.06203e-05	4.56062e-05	0.00544149	0.000698972	0.0182402	0.0192443	8.52386e-05	6.76446e-05	0.46166	0.0304733	0.029547
C13	9.79255e-05	0.00160419	0.0218112	3.38874e-05	5.21929e-05	0.000382459	0.000636442	0.00541093	0.000959822	0.00197216	0.0366325	0.919817	4.08436	1.15405e-05	4.12678e-05	0.000382907	4.09817e-05	2.62833e-05	0.00460411	0.000231021	0.00634602	0.00893173	8.12721e-05	0.000132172	0.0283469	0.481463	0.477358
H14	0.0189893	0.000859847	9.48373e-05	0.00845786	0.462396	0.0013794	0.0176965	0.00826219	0.00585215	0.00289554	6.27473e-06	1.30557e-05	1.15405e-05	0.391522	0.0143898	0.000128719	0.000177335	0.00470358	0.00341855	0.00360493	1.32273e-06	2.28659e-06	0.000120253	9.43004e-05	1.36042e-05	6.62485e-07	1.79012e-05
H15	0.0229829	0.00227591	0.000186882	0.00456464	0.461982	0.0049911	0.0191409	0.000766147	0.00970826	0.000124924	7.10809e-05	3.98558e-05	4.12678e-05	0.0143898	0.386532	0.000172956	0.000937879	0.000836523	0.000230525	0.000376968	2.16057e-05	6.45316e-06	1.07719e-05	4.44366e-06	7.88818e-05	3.3861e-06	4.13687e-06
H16	0.0237548	0.000491069	0.000109812	0.00787288	0.00220418	0.454986	0.00869226	0.0172284	0.00383011	0.00682669	0.00036223	0.003398	0.000382907	0.000128719	0.000172956	0.376403	0.0143245	0.00106994	0.00203939	0.000100665	0.000110905	1.41811e-05	0.000426929	0.000796698	0.00712902	0.000110655	0.000123428
H17	0.0223054	3.96898e-05	1.23215e-05	0.00388119	0.00503847	0.464757	0.0008461	0.0182603	0.000236998	0.00695447	6.78243e-06	8.06203e-05	4.09817e-05	0.000177335	0.000937879	0.0143245	0.392146	3.62542e-05	0.00415848	4.67954e-05	1.74099e-06	1.11628e-06	0.00306637	0.000458467	0.000206338	4.42666e-06	3.43867e-05
H18	0.00251349	0.010413	0.00120281	0.0115538	0.0173272	0.000497679	0.460517	0.000153183	0.0272358	8.26159e-05	9.05543e-05	4.56062e-05	2.62833e-05	0.00470358	0.000836523	0.00106994	3.62542e-05	0.371049	0.000117709	0.00586858	2.32682e-05	2.19021e-05	4.97206e-06	5.06005e-06	0.000113735	2.7482e-06	1.64047e-06
H19	0.00124133	0.00049797	0.000375162	0.000516172	0.00285696	0.0186022	0.00296549	0.462433	0.00545114	0.02791	0.000288918	0.00544149	0.00460411	0.00341855	0.000230525	0.00203939	0.00415848	0.000117709	0.392164	0.00249003	5.2519e-05	5.41535e-05	0.00638637	0.00357461	0.00308772	0.000161177	0.00169519
H20	0.000661309	0.0274674	0.0113819	0.000537006	0.00569453	0.000210995	0.0252108	0.00107019	0.462701	0.000131853	0.000319824	0.000698972	0.000231021	0.00360493	0.000376968	0.000100665	4.67954e-05	0.00586858	0.00249003	0.378634	1.80482e-05	0.000183361	5.77216e-05	1.68799e-05	0.00034872	1.03756e-05	1.24698e-05
H21	9.39364e-05	0.00807177	0.025791	1.82958e-05	5.03669e-05	4.71375e-05	0.000689512	5.55988e-05	0.000434188	1.39517e-05	0.463827	0.0182402	0.00634602	1.32273e-06	2.16057e-05	0.000110905	1.74099e-06	2.32682e-05	5.2519e-05	1.80482e-05	0.398115	0.0144302	1.19924e-06	7.23849e-07	0.00478932	0.00414988	0.000450088
H22	1.45926e-05	0.00793081	0.0299968	6.97151e-06	1.1504e-05	9.33548e-06	0.000179339	1.9092e-05	0.000324242	5.18344e-06	0.463217	0.0192443	0.00893173	2.28659e-06	6.45316e-06	1.41811e-05	1.11628e-06	2.19021e-05	5.41535e-05	0.000183361	0.0144302	0.388738	4.78241e-07	7.52737e-07	0.00126357	0.000445424	0.000782871
H23	0.00140811	1.3301e-05	7.47345e-06	0.000455281	0.00015341	0.00604023	9.92931e-05	0.0298143	0.000121902	0.480911	5.71733e-06	8.52386e-05	8.12721e-05	0.000120253	1.07719e-05	0.000426929	0.00306637	4.97206e-06	0.00638637	5.77216e-05	1.19924e-06	4.78241e-07	0.409155	0.0166808	6.90596e-05	5.6236e-06	0.000128383
H24	0.000902656	6.49091e-06	8.25722e-06	0.000522875	7.52476e-05	0.00634826	3.67793e-05	0.0298983	4.14406e-05	0.483125	7.97645e-06	6.76446e-05	0.000132172	9.43004e-05	4.44366e-06	0.000796698	0.000458467	5.06005e-06	0.00357461	1.68799e-05	7.23849e-07	7.52737e-07	0.0166808	0.406463	2.71137e-05	6.355e-06	0.000300259
H25	0.000818562	0.00599715	0.00258334	0.000148598	0.000159393	0.00438968	0.0032416	0.00310502	0.00811662	0.000473933	0.018622	0.46166	0.0283469	1.36042e-05	7.88818e-05	0.00712902	0.000206338	0.000113735	0.00308772	0.00034872	0.00478932	0.00126357	6.90596e-05	2.71137e-05	0.396821	0.00647991	0.00348721
H26	1.29001e-05	0.000328874	0.000991341	2.60554e-06	5.42076e-06	4.27565e-05	9.0497e-05	0.000360166	0.000170608	0.00017201	0.00623411	0.0304733	0.481463	6.62485e-07	3.3861e-06	0.000110655	4.42666e-06	2.7482e-06	0.000161177	1.03756e-05	0.00414988	0.000445424	5.6236e-06	6.355e-06	0.00647991	0.415023	0.0162788
H27	0.0001831	0.000162161	0.0014198	7.28028e-05	1.80875e-05	0.000512359	3.57166e-05	0.00816516	8.13314e-05	0.0050113	0.00616913	0.029547	0.477358	1.79012e-05	4.13687e-06	0.000123428	3.43867e-05	1.64047e-06	0.00169519	1.24698e-05	0.000450088	0.000782871	0.000128383	0.000300259	0.00348721	0.0162788	0.396857
LDM — ajoene_e_31_LIDI_matrix
	S1	S2	S3	O4	C5	C6	C7	C8	C9	C10	C11	C12	C13	H14	H15	H16	H17	H18	H19	H20	H21	H22	H23	H24	H25	H26	H27
S1	12.9402	0.00287643	0.00115364	0.680295	0.462252	0.464387	0.0310904	0.0275136	0.0169623	0.0164827	0.000235506	0.00105769	0.00278316	0.0208837	0.0238312	0.0227617	0.0199638	0.00239698	0.00221982	0.000816307	2.67144e-05	6.34898e-05	0.000753649	0.00132374	0.000797493	0.00451624	0.000168549		92.2818	31.7164	63.4327
S2	0.00287643	14.5404	0.650863	0.00100958	0.00930713	0.000442305	0.062295	4.2745e-05	0.576837	8.57158e-05	0.037836	0.0124458	0.00749916	0.00178	0.000920098	0.000120426	5.48086e-05	0.0115926	5.86278e-06	0.0273995	0.00446635	0.00874884	7.19166e-06	3.49211e-06	0.000592883	0.000269396	0.00104724
S3	0.00115364	0.650863	14.645	0.000535738	0.00177312	0.000247727	0.0142592	1.39919e-05	0.0428842	3.46301e-05	0.527732	0.0371214	0.019832	0.000124439	0.000131683	7.25459e-05	9.21791e-06	0.00130855	2.09835e-06	0.0104862	0.0298432	0.027729	1.68483e-06	1.42066e-06	0.00634726	0.00150862	0.00125799
O4	0.680295	0.00100958	0.000535738	8.3381	0.0616947	0.0604313	0.0113004	0.0137904	0.00957404	0.00299744	0.00077807	0.00955689	0.00587495	0.00845018	0.00523081	0.00369146	0.00841962	0.000406935	0.0117092	0.00232733	0.000262934	5.25644e-05	0.000496697	0.000290575	0.0150451	0.00584444	0.000488858
C5	0.462252	0.00930713	0.00177312	0.0616947	4.06244	0.0240182	0.519203	0.00868729	0.036844	0.00483157	0.00012793	0.000159034	0.000184476	0.467177	0.454388	0.00472525	0.00363507	0.0187744	0.000239635	0.00571704	9.1738e-06	4.21269e-05	0.000304858	0.000156379	8.01762e-05	0.000138989	6.64401e-06
C6	0.464387	0.000442305	0.000247727	0.0604313	0.0240182	4.0656	0.00488874	0.517432	0.00232873	0.0374432	4.38686e-05	0.000244572	9.20415e-05	0.00365157	0.00321776	0.464282	0.466291	0.000238588	0.0186706	0.00015632	1.22261e-05	6.56699e-06	0.0062719	0.00636017	0.000334514	0.00021834	5.27109e-06
C7	0.0310904	0.062295	0.0142592	0.0113004	0.519203	0.00488874	3.95346	0.000925553	0.87497	0.000508097	0.00155452	0.00434637	0.0046541	0.0186178	0.017328	0.000988336	0.000391516	0.469901	2.77643e-05	0.0245102	0.000124226	0.000571907	3.88645e-05	1.63761e-05	0.00068266	0.000348144	0.000149573
C8	0.0275136	4.2745e-05	1.39919e-05	0.0137904	0.00868729	0.517432	0.000925553	3.97597	0.000157057	0.916963	3.3011e-06	1.97505e-05	3.57182e-05	0.000590545	0.0118154	0.0191778	0.0178468	0.000229729	0.465322	5.35899e-05	7.46383e-07	5.31178e-07	0.0306243	0.0299954	1.60914e-05	7.30906e-05	1.92604e-06
C9	0.0169623	0.576837	0.0428842	0.00957404	0.036844	0.00232873	0.87497	0.000157057	4.07551	0.000403771	0.00221312	0.0087031	0.00485008	0.0069597	0.00633218	0.000637963	0.000167293	0.0287464	1.84126e-05	0.461751	0.000337809	0.000354551	2.25119e-05	1.61666e-05	0.00230165	0.000184765	0.00015764
C10	0.0164827	8.57158e-05	3.46301e-05	0.00299744	0.00483157	0.0374432	0.000508097	0.916963	0.000403771	4.08248	5.92418e-06	1.45638e-05	1.84232e-05	0.000503408	0.00878002	0.01022	0.0059754	0.00017443	0.0275734	4.07148e-05	1.09383e-06	1.08525e-06	0.481912	0.483062	1.12686e-05	4.55971e-05	1.72282e-06
C11	0.000235506	0.037836	0.527732	0.00077807	0.00012793	4.38686e-05	0.00155452	3.3011e-06	0.00221312	5.92418e-06	4.0127	0.516529	0.0379531	3.13854e-05	1.8159e-05	6.16066e-06	5.55508e-06	0.000122656	7.3001e-07	0.000318387	0.464951	0.462886	4.82018e-07	3.89691e-07	0.0182864	0.00620171	0.00646193
C12	0.00105769	0.0124458	0.0371214	0.00955689	0.000159034	0.000244572	0.00434637	1.97505e-05	0.0087031	1.45638e-05	0.516529	3.97182	0.913572	3.73438e-05	1.89152e-05	1.05104e-05	3.7267e-05	0.000464425	6.68568e-06	0.000452688	0.018412	0.0190706	1.55794e-06	1.27859e-06	0.459696	0.0294266	0.0307216
C13	0.00278316	0.00749916	0.019832	0.00587495	0.000184476	9.20415e-05	0.0046541	3.57182e-05	0.00485008	1.84232e-05	0.0379531	0.913572	4.08107	3.18569e-05	4.59984e-05	6.41545e-06	1.06377e-05	0.00100249	6.66548e-06	0.000119894	0.00664096	0.0103305	1.03681e-06	1.628e-06	0.0263824	0.478632	0.482336
H14	0.0208837	0.00178	0.000124439	0.00845018	0.467177	0.00365157	0.0186178	0.000590545	0.0069597	0.000503408	3.13854e-05	3.73438e-05	3.18569e-05	0.404805	0.014464	0.000293208	0.00316847	0.00205719	8.52363e-05	0.000407389	1.86598e-06	8.10317e-06	0.000207503	2.28299e-05	2.02728e-05	7.30566e-06	2.5914e-06
H15	0.0238312	0.000920098	0.000131683	0.00523081	0.454388	0.00321776	0.017328	0.0118154	0.00633218	0.00878002	1.8159e-05	1.89152e-05	4.59984e-05	0.014464	0.370904	0.000209856	0.00017743	0.00413708	0.000510984	0.0033595	3.04458e-06	4.64419e-06	0.000338806	0.000228015	7.66687e-06	5.47051e-05	1.19318e-06
H16	0.0227617	0.000120426	7.25459e-05	0.00369146	0.00472525	0.464282	0.000988336	0.0191778	0.000637963	0.01022	6.16066e-06	1.05104e-05	6.41545e-06	0.000293208	0.000209856	0.391104	0.0149082	2.55403e-05	0.00103787	2.98663e-05	7.55969e-07	2.80955e-06	0.000477229	0.000767791	8.89134e-06	5.02002e-06	3.36385e-07
H17	0.0199638	5.48086e-05	9.21791e-06	0.00841962	0.00363507	0.466291	0.000391516	0.0178468	0.000167293	0.0059754	5.55508e-06	3.7267e-05	1.06377e-05	0.00316847	0.00017743	0.0149082	0.403204	1.22057e-05	0.005013	8.89802e-06	1.77067e-06	6.48317e-07	0.00387524	0.000445939	6.06625e-05	9.5574e-06	4.43496e-07
H18	0.00239698	0.0115926	0.00130855	0.000406935	0.0187744	0.000238588	0.469901	0.000229729	0.0287464	0.00017443	0.000122656	0.000464425	0.00100249	0.00205719	0.00413708	2.55403e-05	1.22057e-05	0.40036	7.58799e-06	0.00605624	1.79087e-05	2.46755e-05	5.1116e-06	6.21684e-06	3.82926e-05	9.521e-05	4.37425e-05
H19	0.00221982	5.86278e-06	2.09835e-06	0.0117092	0.000239635	0.0186706	2.77643e-05	0.465322	1.84126e-05	0.0275734	7.3001e-07	6.68568e-06	6.66548e-06	8.52363e-05	0.000510984	0.00103787	0.005013	7.58799e-06	0.381168	1.22056e-05	3.22476e-07	7.41958e-08	0.00647458	0.00352039	8.18446e-06	7.88845e-06	5.97565e-07
H20	0.000816307	0.0273995	0.0104862	0.00232733	0.00571704	0.00015632	0.0245102	5.35899e-05	0.461751	4.07148e-05	0.000318387	0.000452688	0.000119894	0.000407389	0.0033595	2.98663e-05	8.89802e-06	0.00605624	1.22056e-05	0.372505	0.000172174	1.55254e-05	1.49007e-06	1.50974e-06	0.00048155	1.08262e-05	2.65323e-05
H21	2.67144e-05	0.00446635	0.0298432	0.000262934	9.1738e-06	1.22261e-05	0.000124226	7.46383e-07	0.000337809	1.09383e-06	0.464951	0.018412	0.00664096	1.86598e-06	3.04458e-06	7.55969e-07	1.77067e-06	1.79087e-05	3.22476e-07	0.000172174	0.39981	0.0148272	9.59822e-08	7.98158e-08	0.00485772	0.000473235	0.00455164
H22	6.34898e-05	0.00874884	0.027729	5.25644e-05	4.21269e-05	6.56699e-06	0.000571907	5.31178e-07	0.000354551	1.08525e-06	0.462886	0.0190706	0.0103305	8.10317e-06	4.64419e-06	2.80955e-06	6.48317e-07	2.46755e-05	7.41958e-08	1.55254e-05	0.0148272	0.397822	7.70556e-08	6.29102e-08	0.00102458	0.000764747	0.000509826
H23	0.000753649	7.19166e-06	1.68483e-06	0.000496697	0.000304858	0.0062719	3.88645e-05	0.0306243	2.25119e-05	0.481912	4.82018e-07	1.55794e-06	1.03681e-06	0.000207503	0.000338806	0.000477229	0.00387524	5.1116e-06	0.00647458	1.49007e-06	9.59822e-08	7.70556e-08	0.417087	0.0169426	1.72057e-06	1.9322e-06	7.54119e-08
H24	0.00132374	3.49211e-06	1.42066e-06	0.000290575	0.000156379	0.00636017	1.63761e-05	0.0299954	1.61666e-05	0.483062	3.89691e-07	1.27859e-06	1.628e-06	2.28299e-05	0.000228015	0.000767791	0.000445939	6.21684e-06	0.00352039	1.50974e-06	7.98158e-08	6.29102e-08	0.0169426	0.407021	1.05928e-06	4.48453e-06	9.80632e-08
H25	0.000797493	0.000592883	0.00634726	0.0150451	8.01762e-05	0.000334514	0.00068266	1.60914e-05	0.00230165	1.12686e-05	0.0182864	0.459696	0.0263824	2.02728e-05	7.66687e-06	8.89134e-06	6.06625e-05	3.82926e-05	8.18446e-06	0.00048155	0.00485772	0.00102458	1.72057e-06	1.05928e-06	0.370406	0.00337291	0.0064121
H26	0.00451624	0.000269396	0.00150862	0.00584444	0.000138989	0.00021834	0.000348144	7.30906e-05	0.000184765	4.55971e-05	0.00620171	0.0294266	0.478632	7.30566e-06	5.47051e-05	5.02002e-06	9.5574e-06	9.521e-05	7.88845e-06	1.08262e-05	0.000473235	0.000764747	1.9322e-06	4.48453e-06	0.00337291	0.399745	0.0167029
H27	0.000168549	0.00104724	0.00125799	0.000488858	6.64401e-06	5.27109e-06	0.000149573	1.92604e-06	0.00015764	1.72282e-06	0.00646193	0.0307216	0.482336	2.5914e-06	1.19318e-06	3.36385e-07	4.43496e-07	4.37425e-05	5.97565e-07	2.65323e-05	0.00455164	0.000509826	7.54119e-08	9.80632e-08	0.0064121	0.0167029	0.421065
LDM — ajoene_e_32_LIDI_matrix
	S1	S2	S3	O4	C5	C6	C7	C8	C9	C10	C11	C12	C13	H14	H15	H16	H17	H18	H19	H20	H21	H22	H23	H24	H25	H26	H27
S1	12.9365	0.00182782	0.00213638	0.680324	0.464478	0.465339	0.0319635	0.0276201	0.0169504	0.0166985	0.00102807	0.000127362	0.00036935	0.0208495	0.0232789	0.02278	0.0202382	0.00162146	0.00218479	0.000765633	0.00306757	8.84904e-05	0.0013187	0.000770874	8.2887e-05	2.57847e-05	0.000974143		92.3097	31.6925	63.3851
S2	0.00182782	14.5495	0.641126	0.00051006	0.00938573	0.000294983	0.0568536	9.76241e-05	0.57338	0.000112283	0.036959	0.0180767	0.0104831	0.000998888	0.00155223	8.19681e-05	2.51996e-05	0.0125304	3.05891e-06	0.0289725	0.00269016	0.00898701	3.55461e-06	6.62926e-06	0.000910913	0.000329293	0.00039409
S3	0.00213638	0.641126	14.6542	0.000545666	0.00188848	0.000304353	0.0215124	2.05826e-05	0.0464891	6.5557e-05	0.529115	0.0379705	0.0206354	0.000141218	0.000309998	0.000101311	1.17619e-05	0.00140847	1.78974e-06	0.0062676	0.0290308	0.0278345	2.79774e-06	2.68086e-06	0.00724357	0.00158754	0.00114885
O4	0.680324	0.00051006	0.000545666	8.34409	0.0613816	0.0603536	0.0142845	0.0141832	0.00338038	0.00309657	0.000565272	0.000755718	0.00826396	0.00821924	0.00401003	0.00351408	0.00839024	0.00727355	0.0115924	0.000367173	0.00141532	4.69603e-05	0.000287608	0.000491292	0.000370277	0.000523527	0.0189596
C5	0.464478	0.00938573	0.00188848	0.0613816	4.07515	0.0241793	0.517209	0.0083228	0.0365998	0.00482427	0.000166025	4.76887e-05	0.000154694	0.467288	0.453839	0.00480614	0.00365258	0.0173034	0.000210548	0.0054189	0.000267652	2.19875e-05	0.000152329	0.000275037	6.63171e-06	2.95388e-06	0.000147668
C6	0.465339	0.000294983	0.000304353	0.0603536	0.0241793	4.06874	0.00453574	0.517477	0.00186656	0.037527	2.7306e-05	1.4787e-05	0.000199012	0.00227005	0.0043913	0.464265	0.466178	0.000205327	0.0186574	8.74921e-05	0.000139443	5.67458e-06	0.00634843	0.00628346	6.22185e-06	1.45774e-05	0.000433398
C7	0.0319635	0.0568536	0.0215124	0.0142845	0.517209	0.00453574	3.95712	0.000782017	0.879274	0.000465645	0.00306374	0.000895858	0.00245436	0.0180417	0.0179815	0.000987864	0.000449653	0.458571	2.15684e-05	0.0263442	0.0050362	0.000416559	1.69963e-05	4.09113e-05	0.000109939	9.13581e-05	0.0023322
C8	0.0276201	9.76241e-05	2.05826e-05	0.0141832	0.0083228	0.517477	0.000782017	3.97596	0.000333791	0.916064	1.07657e-05	1.70237e-06	1.38365e-05	0.000448532	0.0128746	0.0190611	0.0177956	3.46387e-05	0.465298	2.1491e-05	5.34175e-05	9.95098e-07	0.0298787	0.0306033	1.36479e-06	1.28245e-06	2.72262e-05
C9	0.0169504	0.57338	0.0464891	0.00338038	0.0365998	0.00186656	0.879274	0.000333791	4.08736	0.000644356	0.00595503	0.000988271	0.00080542	0.00606872	0.00750613	0.000578562	7.64434e-05	0.0264194	1.49347e-05	0.467604	0.00629166	0.000690392	2.42354e-05	2.62435e-05	0.000172855	3.98204e-05	0.000604709
C10	0.0166985	0.000112283	6.5557e-05	0.00309657	0.00482427	0.037527	0.000465645	0.916064	0.000644356	4.08196	8.26365e-06	1.02038e-06	5.24832e-06	0.000266838	0.0105121	0.0100457	0.00598509	3.03763e-05	0.027469	2.50547e-05	3.63029e-05	2.00504e-06	0.482772	0.481711	2.74278e-07	4.36764e-07	1.29114e-05
C11	0.00102807	0.036959	0.529115	0.000565272	0.000166025	2.7306e-05	0.00306374	1.07657e-05	0.00595503	8.26365e-06	4.01355	0.516332	0.0374135	1.4838e-05	5.41272e-05	4.08674e-06	2.08886e-06	0.000264101	5.43469e-07	0.000302208	0.459015	0.4633	7.25543e-07	4.99946e-07	0.020193	0.00639679	0.00567235
C12	0.000127362	0.0180767	0.0379705	0.000755718	4.76887e-05	1.4787e-05	0.000895858	1.70237e-06	0.000988271	1.02038e-06	0.516332	3.97175	0.917733	2.58515e-05	5.65458e-06	8.14522e-07	3.23469e-06	0.00151381	5.14217e-07	0.000220202	0.0180796	0.0190336	1.0445e-07	1.42615e-07	0.473609	0.0309342	0.0277112
C13	0.00036935	0.0104831	0.0206354	0.00826396	0.000154694	0.000199012	0.00245436	1.38365e-05	0.00080542	5.24832e-06	0.0374135	0.917733	4.0915	5.83528e-05	6.70639e-06	5.97215e-06	4.0012e-05	0.00426601	7.03166e-06	0.00015794	0.00634497	0.009901	6.24809e-07	1.29921e-06	0.0290906	0.484766	0.464306
H14	0.0208495	0.000998888	0.000141218	0.00821924	0.467288	0.00227005	0.0180417	0.000448532	0.00606872	0.000266838	1.4838e-05	2.58515e-05	5.83528e-05	0.402548	0.0142913	0.000181132	0.00204643	0.00462855	6.211e-05	0.00360799	1.34955e-05	2.7284e-06	1.06864e-05	7.31365e-05	1.23597e-06	8.35378e-07	4.58008e-05
H15	0.0232789	0.00155223	0.000309998	0.00401003	0.453839	0.0043913	0.0179815	0.0128746	0.00750613	0.0105121	5.41272e-05	5.65458e-06	6.70639e-06	0.0142913	0.368544	0.000337433	0.000335283	0.00152495	0.000398805	0.000391538	8.91624e-05	7.53533e-06	0.000263366	0.000569917	1.07323e-06	1.89413e-07	7.76735e-06
H16	0.02278	8.19681e-05	0.000101311	0.00351408	0.00480614	0.464265	0.000987864	0.0190611	0.000578562	0.0100457	4.08674e-06	8.14522e-07	5.97215e-06	0.000181132	0.000337433	0.389808	0.014864	1.73996e-05	0.00104195	2.33665e-05	5.96971e-06	1.27345e-06	0.000761089	0.000470742	4.41378e-07	5.04723e-07	1.0993e-05
H17	0.0202382	2.51996e-05	1.17619e-05	0.00839024	0.00365258	0.466178	0.000449653	0.0177956	7.64434e-05	0.00598509	2.08886e-06	3.23469e-06	4.0012e-05	0.00204643	0.000335283	0.014864	0.401688	8.52435e-05	0.00499868	8.89846e-06	3.64829e-06	2.6236e-07	0.000446102	0.00387816	2.23009e-06	2.70208e-06	7.24012e-05
H18	0.00162146	0.0125304	0.00140847	0.00727355	0.0173034	0.000205327	0.458571	3.46387e-05	0.0264194	3.03763e-05	0.000264101	0.00151381	0.00426601	0.00462855	0.00152495	1.73996e-05	8.52435e-05	0.366423	4.98236e-06	0.0058811	0.000241957	5.55901e-05	1.66759e-06	4.10807e-06	7.07274e-05	0.000129771	0.00274411
H19	0.00218479	3.05891e-06	1.78974e-06	0.0115924	0.000210548	0.0186574	2.15684e-05	0.465298	1.49347e-05	0.027469	5.43469e-07	5.14217e-07	7.03166e-06	6.211e-05	0.000398805	0.00104195	0.00499868	4.98236e-06	0.380197	1.08127e-06	2.16775e-06	9.0875e-08	0.00350376	0.00645762	4.41754e-07	6.82804e-07	1.34225e-05
H20	0.000765633	0.0289725	0.0062676	0.000367173	0.0054189	8.74921e-05	0.0263442	2.1491e-05	0.467604	2.50547e-05	0.000302208	0.000220202	0.00015794	0.00360799	0.000391538	2.33665e-05	8.89846e-06	0.0058811	1.08127e-06	0.388696	0.000186162	2.17704e-05	1.23207e-06	1.37886e-06	2.21106e-05	6.95891e-06	4.91168e-05
H21	0.00306757	0.00269016	0.0290308	0.00141532	0.000267652	0.000139443	0.0050362	5.34175e-05	0.00629166	3.63029e-05	0.459015	0.0180796	0.00634497	1.34955e-05	8.91624e-05	5.96971e-06	3.64829e-06	0.000241957	2.16775e-06	0.000186162	0.388882	0.0145685	3.86716e-06	1.55993e-06	0.00506123	0.000444262	0.00367757
H22	8.84904e-05	0.00898701	0.0278345	4.69603e-05	2.19875e-05	5.67458e-06	0.000416559	9.95098e-07	0.000690392	2.00504e-06	0.4633	0.0190336	0.009901	2.7284e-06	7.53533e-06	1.27345e-06	2.6236e-07	5.55901e-05	9.0875e-08	2.17704e-05	0.0145685	0.398045	1.01434e-07	8.11578e-08	0.00118217	0.000778309	0.000440285
H23	0.0013187	3.55461e-06	2.79774e-06	0.000287608	0.000152329	0.00634843	1.69963e-05	0.0298787	2.42354e-05	0.482772	7.25543e-07	1.0445e-07	6.24809e-07	1.06864e-05	0.000263366	0.000761089	0.000446102	1.66759e-06	0.00350376	1.23207e-06	3.86716e-06	1.01434e-07	0.405642	0.0168757	2.23535e-08	5.42923e-08	1.37262e-06
H24	0.000770874	6.62926e-06	2.68086e-06	0.000491292	0.000275037	0.00628346	4.09113e-05	0.0306033	2.62435e-05	0.481711	4.99946e-07	1.42615e-07	1.29921e-06	7.31365e-05	0.000569917	0.000470742	0.00387816	4.10807e-06	0.00645762	1.37886e-06	1.55993e-06	8.11578e-08	0.0168757	0.416097	6.53692e-08	1.06345e-07	2.28142e-06
H25	8.2887e-05	0.000910913	0.00724357	0.000370277	6.63171e-06	6.22185e-06	0.000109939	1.36479e-06	0.000172855	2.74278e-07	0.020193	0.473609	0.0290906	1.23597e-06	1.07323e-06	4.41378e-07	2.23009e-06	7.07274e-05	4.41754e-07	2.21106e-05	0.00506123	0.00118217	2.23535e-08	6.53692e-08	0.415059	0.0037525	0.00606271
H26	2.57847e-05	0.000329293	0.00158754	0.000523527	2.95388e-06	1.45774e-05	9.13581e-05	1.28245e-06	3.98204e-05	4.36764e-07	0.00639679	0.0309342	0.484766	8.35378e-07	1.89413e-07	5.04723e-07	2.70208e-06	0.000129771	6.82804e-07	6.95891e-06	0.000444262	0.000778309	5.42923e-08	1.06345e-07	0.0037525	0.416625	0.0154737
H27	0.000974143	0.00039409	0.00114885	0.0189596	0.000147668	0.000433398	0.0023322	2.72262e-05	0.000604709	1.29114e-05	0.00567235	0.0277112	0.464306	4.58008e-05	7.76735e-06	1.0993e-05	7.24012e-05	0.00274411	1.34225e-05	4.91168e-05	0.00367757	0.000440285	1.37262e-06	2.28142e-06	0.00606271	0.0154737	0.364066
LDM — ajoene_e_33_LIDI_matrix
	S1	S2	S3	O4	C5	C6	C7	C8	C9	C10	C11	C12	C13	H14	H15	H16	H17	H18	H19	H20	H21	H22	H23	H24	H25	H26	H27
S1	12.9377	0.00189794	0.00313196	0.683558	0.457111	0.468809	0.0285709	0.0307652	0.0185844	0.0158055	0.000460895	0.000169377	6.65452e-05	0.0191794	0.0217517	0.0204915	0.0231812	0.0015153	0.00227767	0.00077932	3.57728e-05	0.00119082	0.000691126	0.00100156	0.000270607	7.66555e-06	5.2609e-06		92.3074	31.6925	63.385
S2	0.00189794	14.5827	0.637883	0.00063893	0.00918995	0.000409688	0.0531737	5.69756e-05	0.571185	7.47257e-05	0.0377662	0.00938343	0.00508637	0.000967392	0.00159289	5.83122e-05	0.000943271	0.0129048	1.42044e-05	0.0292381	0.00416518	0.00587627	3.37524e-06	3.79943e-06	0.00051273	0.000240597	0.000495438
S3	0.00313196	0.637883	14.6347	0.00138292	0.00189733	0.00205012	0.0236893	0.000249134	0.0485648	0.000162678	0.527365	0.0438366	0.0201776	0.00013186	0.0003712	9.06658e-05	0.00699335	0.00141142	0.000124038	0.00512922	0.029688	0.0253934	7.22815e-06	1.18275e-05	0.00635635	0.00120549	0.00112141
O4	0.683558	0.00063893	0.00138292	8.34266	0.0618572	0.0613981	0.0188265	0.0122496	0.0038578	0.00299023	0.00508802	0.000566132	0.000213372	0.00790569	0.00287451	0.00849137	0.00423179	0.00948344	0.0095075	0.000369005	0.000257835	0.0126311	0.000453659	0.000207669	0.000126501	1.49537e-05	2.12285e-05
C5	0.457111	0.00918995	0.00189733	0.0618572	4.06897	0.0243198	0.519233	0.00473747	0.0356564	0.00180126	0.000166814	3.65692e-05	3.40585e-05	0.466196	0.466824	0.00280312	0.00378628	0.0173466	0.000233358	0.00537849	1.16097e-05	0.000284849	0.000103032	0.00024981	2.17855e-05	2.04883e-06	2.10878e-06
C6	0.468809	0.000409688	0.00205012	0.0613981	0.0243198	4.07499	0.00640459	0.516219	0.00549688	0.0383368	0.00128999	0.000736938	8.41666e-05	0.00486379	0.0046021	0.466313	0.447331	0.000225558	0.0185192	0.0010777	9.17817e-05	0.00248441	0.00630562	0.00641657	0.00164556	3.51374e-05	1.33235e-05
C7	0.0285709	0.0531737	0.0236893	0.0188265	0.519233	0.00640459	3.94531	0.00074344	0.873107	0.000346421	0.00323581	0.000468768	0.000515002	0.0179179	0.0189765	0.000382932	0.00808157	0.4593	3.14795e-05	0.0263563	0.000212461	0.00682461	2.20315e-05	5.01047e-05	2.23081e-05	1.98004e-05	3.60192e-05
C8	0.0307652	5.69756e-05	0.000249134	0.0122496	0.00473747	0.516219	0.00074344	3.98204	0.000579936	0.920911	0.000450316	0.0045545	0.000645942	0.000558704	0.000923765	0.0178466	0.0176144	2.57259e-05	0.462717	0.000159989	8.69295e-05	0.000435326	0.0305776	0.0301284	0.00857904	0.000149915	6.2842e-05
C9	0.0185844	0.571185	0.0485648	0.0038578	0.0356564	0.00549688	0.873107	0.000579936	4.08358	0.000747524	0.00492232	0.000625828	0.000340923	0.00568327	0.00768184	0.00029437	0.011534	0.0264456	1.7522e-05	0.466862	0.00053073	0.00526152	2.92386e-05	4.58114e-05	8.22997e-05	2.73827e-05	4.21415e-05
C10	0.0158055	7.47257e-05	0.000162678	0.00299023	0.00180126	0.0383368	0.000346421	0.920911	0.000747524	4.08022	0.000110359	0.000972531	0.000145395	8.57286e-05	0.000485502	0.0062717	0.00959991	9.57197e-06	0.0272532	6.6129e-05	4.69934e-05	9.83724e-05	0.481785	0.483007	0.00292122	4.35393e-05	2.49168e-05
C11	0.000460895	0.0377662	0.527365	0.00508802	0.000166814	0.00128999	0.00323581	0.000450316	0.00492232	0.000110359	4.02387	0.514867	0.0372883	2.08448e-05	3.17904e-05	0.000106878	0.00317063	0.000796864	0.000534886	0.000364508	0.465614	0.446745	1.25617e-05	6.78945e-06	0.0190741	0.0062957	0.00635504
C12	0.000169377	0.00938343	0.0438366	0.000566132	3.65692e-05	0.000736938	0.000468768	0.0045545	0.000625828	0.000972531	0.514867	3.97617	0.91956	3.54466e-06	9.08359e-06	6.02035e-05	0.00123573	9.9497e-05	0.00467345	4.17163e-05	0.0182951	0.0178505	9.68757e-05	4.67558e-05	0.46642	0.0301892	0.0303048
C13	6.65452e-05	0.00508637	0.0201776	0.000213372	3.40585e-05	8.41666e-05	0.000515002	0.000645942	0.000340923	0.000145395	0.0372883	0.91956	4.08062	4.41717e-06	1.41515e-05	1.54382e-05	0.000154938	6.36274e-05	0.0014424	1.65337e-05	0.00628496	0.00892123	2.05347e-05	1.48319e-05	0.0287672	0.480794	0.483755
H14	0.0191794	0.000967392	0.00013186	0.00790569	0.466196	0.00486379	0.0179179	0.000558704	0.00568327	8.57286e-05	2.08448e-05	3.54466e-06	4.41717e-06	0.397954	0.0148642	0.00298679	0.000440191	0.00465793	0.000124799	0.00347566	3.17912e-06	4.78643e-05	1.44046e-05	1.30556e-05	1.81659e-06	2.10593e-07	2.67169e-07
H15	0.0217517	0.00159289	0.0003712	0.00287451	0.466824	0.0046021	0.0189765	0.000923765	0.00768184	0.000485502	3.17904e-05	9.08359e-06	1.41515e-05	0.0148642	0.391833	0.000201379	0.000260319	0.00153625	1.66703e-05	0.000404687	1.95971e-06	4.39637e-05	2.37406e-05	6.55217e-05	2.3292e-06	5.57424e-07	8.32888e-07
H16	0.0204915	5.83122e-05	9.06658e-05	0.00849137	0.00280312	0.466313	0.000382932	0.0178466	0.00029437	0.0062717	0.000106878	6.02035e-05	1.54382e-05	0.00298679	0.000201379	0.404297	0.0139271	8.78587e-05	0.00495113	0.000197699	1.31817e-05	0.000212447	0.00399931	0.000462453	9.15346e-05	1.8213e-06	1.36735e-06
H17	0.0231812	0.000943271	0.00699335	0.00423179	0.00378628	0.447331	0.00808157	0.0176144	0.011534	0.00959991	0.00317063	0.00123573	0.000154938	0.000440191	0.000260319	0.0139271	0.363349	0.000169165	0.000960897	0.00209139	0.000303443	0.00408522	0.000441926	0.000686039	0.00157868	6.07526e-05	1.60529e-05
H18	0.0015153	0.0129048	0.00141142	0.00948344	0.0173466	0.000225558	0.4593	2.57259e-05	0.0264456	9.57197e-06	0.000796864	9.9497e-05	6.36274e-05	0.00465793	0.00153625	8.78587e-05	0.000169165	0.368447	7.59597e-06	0.00595357	5.66321e-05	0.00164231	1.07995e-06	1.47469e-06	4.27607e-06	2.73332e-06	6.31489e-06
H19	0.00227767	1.42044e-05	0.000124038	0.0095075	0.000233358	0.0185192	3.14795e-05	0.462717	1.7522e-05	0.0272532	0.000534886	0.00467345	0.0014424	0.000124799	1.66703e-05	0.00495113	0.000960897	7.59597e-06	0.378897	1.08769e-05	4.34693e-05	0.000426044	0.00637325	0.00350415	0.00416226	8.44814e-05	5.97625e-05
H20	0.00077932	0.0292381	0.00512922	0.000369005	0.00537849	0.0010777	0.0263563	0.000159989	0.466862	6.6129e-05	0.000364508	4.17163e-05	1.65337e-05	0.00347566	0.000404687	0.000197699	0.00209139	0.00595357	1.08769e-05	0.389827	0.000133635	0.000138745	4.02627e-06	7.30672e-06	1.35449e-05	2.57454e-06	2.80049e-06
H21	3.57728e-05	0.00416518	0.029688	0.000257835	1.16097e-05	9.17817e-05	0.000212461	8.69295e-05	0.00053073	4.69934e-05	0.465614	0.0182951	0.00628496	3.17912e-06	1.95971e-06	1.31817e-05	0.000303443	5.66321e-05	4.34693e-05	0.000133635	0.397611	0.0138172	1.80648e-06	1.73926e-06	0.00503804	0.00402193	0.000459241
H22	0.00119082	0.00587627	0.0253934	0.0126311	0.000284849	0.00248441	0.00682461	0.000435326	0.00526152	9.83724e-05	0.446745	0.0178505	0.00892123	4.78643e-05	4.39637e-05	0.000212447	0.00408522	0.00164231	0.000426044	0.000138745	0.0138172	0.358073	1.83353e-05	6.88898e-06	0.00137887	0.000488897	0.000734104
H23	0.000691126	3.37524e-06	7.22815e-06	0.000453659	0.000103032	0.00630562	2.20315e-05	0.0305776	2.92386e-05	0.481785	1.25617e-05	9.68757e-05	2.05347e-05	1.44046e-05	2.37406e-05	0.00399931	0.000441926	1.07995e-06	0.00637325	4.02627e-06	1.80648e-06	1.83353e-05	0.415376	0.0168349	0.000119541	2.76538e-06	1.54567e-06
H24	0.00100156	3.79943e-06	1.18275e-05	0.000207669	0.00024981	0.00641657	5.01047e-05	0.0301284	4.58114e-05	0.483007	6.78945e-06	4.67558e-05	1.48319e-05	1.30556e-05	6.55217e-05	0.000462453	0.000686039	1.47469e-06	0.00350415	7.30672e-06	1.73926e-06	6.88898e-06	0.0168349	0.406441	0.000103255	1.75712e-06	4.28098e-06
H25	0.000270607	0.00051273	0.00635635	0.000126501	2.17855e-05	0.00164556	2.23081e-05	0.00857904	8.22997e-05	0.00292122	0.0190741	0.46642	0.0287672	1.81659e-06	2.3292e-06	9.15346e-05	0.00157868	4.27607e-06	0.00416226	1.35449e-05	0.00503804	0.00137887	0.000119541	0.000103255	0.400634	0.00650781	0.00359753
H26	7.66555e-06	0.000240597	0.00120549	1.49537e-05	2.04883e-06	3.51374e-05	1.98004e-05	0.000149915	2.73827e-05	4.35393e-05	0.0062957	0.0301892	0.480794	2.10593e-07	5.57424e-07	1.8213e-06	6.07526e-05	2.73332e-06	8.44814e-05	2.57454e-06	0.00402193	0.000488897	2.76538e-06	1.75712e-06	0.00650781	0.41059	0.0167989
H27	5.2609e-06	0.000495438	0.00112141	2.12285e-05	2.10878e-06	1.33235e-05	3.60192e-05	6.2842e-05	4.21415e-05	2.49168e-05	0.00635504	0.0303048	0.483755	2.67169e-07	8.32888e-07	1.36735e-06	1.60529e-05	6.31489e-06	5.97625e-05	2.80049e-06	0.000459241	0.000734104	1.54567e-06	4.28098e-06	0.00359753	0.0167989	0.410524
LDM — ajoene_e_34_LIDI_matrix
	S1	S2	S3	O4	C5	C6	C7	C8	C9	C10	C11	C12	C13	H14	H15	H16	H17	H18	H19	H20	H21	H22	H23	H24	H25	H26	H27
S1	12.9283	0.00209674	0.00116624	0.687466	0.464638	0.465343	0.0266648	0.0277855	0.012633	0.0164467	0.000188795	4.09891e-05	5.01582e-05	0.0234958	0.0224199	0.0231565	0.0195241	0.00441233	0.00216485	0.000856915	1.1954e-05	0.00034809	0.000692735	0.00132957	1.08434e-05	3.68367e-06	0.000132479		92.2945	31.7066	63.4132
S2	0.00209674	14.5517	0.643004	0.000984934	0.00929124	0.000341088	0.0607394	0.000236836	0.577394	0.0007012	0.0386969	0.0095464	0.00509799	0.000859802	0.00205087	2.50054e-05	0.000432354	0.0121303	1.63943e-05	0.0274689	0.00718185	0.00469453	0.000682105	2.03157e-05	0.000415634	0.000462991	0.000222305
S3	0.00116624	0.643004	14.6296	0.000747279	0.00174277	0.000402728	0.0169896	0.000459824	0.0448713	0.00339987	0.525854	0.0406217	0.0199845	7.47095e-05	0.000307591	2.30925e-05	0.000807999	0.00132537	0.000149657	0.00826039	0.0294424	0.0280197	0.00988049	0.000204938	0.00481057	0.00108771	0.000982228
O4	0.687466	0.000984934	0.000747279	8.36875	0.0633046	0.0618212	0.00948455	0.0126082	0.00501526	0.00308434	0.000160872	2.63981e-05	3.3696e-05	0.00607791	0.00481103	0.0039335	0.00818548	0.000798219	0.0106121	0.000282282	1.15132e-05	0.000350154	0.000434454	0.000300834	1.16089e-05	2.24833e-06	8.72326e-05
C5	0.464638	0.00929124	0.00174277	0.0633046	4.06927	0.0231677	0.519951	0.00841519	0.0359406	0.00388017	0.000144013	2.78337e-05	3.1413e-05	0.456056	0.462563	0.00507232	0.00172212	0.0183597	0.000250504	0.00552872	9.41646e-06	9.91004e-05	0.000179994	0.000139575	7.53887e-06	2.49108e-06	2.71251e-05
C6	0.465343	0.000341088	0.000402728	0.0618212	0.0231677	4.06879	0.00803618	0.517567	0.00376607	0.0369769	0.00135092	0.000123124	0.000257633	0.0026786	0.00476384	0.464005	0.457663	0.00038003	0.0187362	0.000236745	6.56806e-05	0.00401377	0.00535926	0.00634615	8.42428e-05	2.8969e-05	0.000809901
C7	0.0266648	0.0607394	0.0169896	0.00948455	0.519951	0.00803618	3.96391	0.00150794	0.876067	0.00143686	0.00186671	0.000407213	0.000435345	0.0172649	0.0190872	0.000813836	0.00918189	0.46866	0.000136459	0.0248747	0.000138091	0.00217689	0.000955325	5.80911e-05	7.96959e-05	3.36311e-05	2.68213e-05
C8	0.0277855	0.000236836	0.000459824	0.0126082	0.00841519	0.517567	0.00150794	3.97905	0.00204982	0.913655	0.000116827	0.000106118	0.000633787	0.0097397	0.000751391	0.0191679	0.0172936	0.000171854	0.466209	0.00241649	6.11832e-06	0.000365863	0.0287013	0.0299922	3.29739e-05	4.5701e-05	0.00203494
C9	0.012633	0.577394	0.0448713	0.00501526	0.0359406	0.00376607	0.876067	0.00204982	4.08856	0.00534843	0.00403001	0.000617271	0.000194087	0.00584199	0.00930729	0.000239832	0.00558359	0.0288418	0.000127056	0.459429	0.000395233	0.00430888	0.00386506	0.000184098	0.000168008	1.63637e-05	3.61372e-05
C10	0.0164467	0.0007012	0.00339987	0.00308434	0.00388017	0.0369769	0.00143686	0.913655	0.00534843	4.08262	0.000869593	0.000481995	0.00248713	0.00645147	0.000306692	0.0101561	0.00526751	0.00017811	0.0277184	0.00632901	5.97595e-05	0.00182269	0.469475	0.48279	0.000105448	0.000152876	0.00532248
C11	0.000188795	0.0386969	0.525854	0.000160872	0.000144013	0.00135092	0.00186671	0.000116827	0.00403001	0.000869593	4.00675	0.515409	0.0374899	9.59953e-06	6.64579e-05	5.49527e-05	0.00392184	0.000151989	0.000106179	0.000299899	0.464179	0.456884	0.00264171	9.33714e-05	0.0196032	0.00632535	0.00594003
C12	4.09891e-05	0.0095464	0.0406217	2.63981e-05	2.78337e-05	0.000123124	0.000407213	0.000106118	0.000617271	0.000481995	0.515409	3.9803	0.920603	2.39047e-06	1.18347e-05	1.37144e-05	0.000325555	2.5321e-05	1.96307e-05	3.50152e-05	0.0188126	0.0179469	0.00129491	2.06844e-05	0.473643	0.0300047	0.0297641
C13	5.01582e-05	0.00509799	0.0199845	3.3696e-05	3.1413e-05	0.000257633	0.000435345	0.000633787	0.000194087	0.00248713	0.0374899	0.920603	4.07892	6.57658e-06	1.93391e-05	4.46522e-05	0.0003859	1.51784e-05	6.4564e-05	1.41808e-05	0.00890294	0.00640714	0.00379266	7.80754e-05	0.0293997	0.482856	0.476028
H14	0.0234958	0.000859802	7.47095e-05	0.00607791	0.456056	0.0026786	0.0172649	0.0097397	0.00584199	0.00645147	9.59953e-06	2.39047e-06	6.57658e-06	0.373697	0.013996	0.000199283	0.000102993	0.00480718	0.000566058	0.00370923	2.24379e-06	8.47577e-06	0.000180032	0.000182031	4.99321e-07	4.58387e-07	1.9998e-05
H15	0.0224199	0.00205087	0.000307591	0.00481103	0.462563	0.00476384	0.0190872	0.000751391	0.00930729	0.000306692	6.64579e-05	1.18347e-05	1.93391e-05	0.013996	0.386677	0.000959112	0.00019404	0.00111924	2.01935e-05	0.000404179	4.13697e-06	4.58861e-05	3.33316e-05	9.27745e-06	1.16965e-06	1.97453e-06	6.66789e-06
H16	0.0231565	2.50054e-05	2.30925e-05	0.0039335	0.00507232	0.464005	0.000813836	0.0191679	0.000239832	0.0101561	5.49527e-05	1.37144e-05	4.46522e-05	0.000199283	0.000959112	0.391223	0.0145047	2.47598e-05	0.00102629	6.42583e-05	2.80641e-06	0.000174322	0.000426361	0.000759079	7.43646e-06	4.93782e-06	0.000110256
H17	0.0195241	0.000432354	0.000807999	0.00818548	0.00172212	0.457663	0.00918189	0.0172936	0.00558359	0.00526751	0.00392184	0.000325555	0.0003859	0.000102993	0.00019404	0.0145047	0.390241	0.000467814	0.00472517	0.000149871	0.000204233	0.00904583	0.00279942	0.000366417	0.000191822	4.16187e-05	0.00075323
H18	0.00441233	0.0121303	0.00132537	0.000798219	0.0183597	0.00038003	0.46866	0.000171854	0.0288418	0.00017811	0.000151989	2.5321e-05	1.51784e-05	0.00480718	0.00111924	2.47598e-05	0.000467814	0.396066	2.47774e-05	0.00600594	3.296e-05	0.000122136	6.11336e-05	7.95874e-06	3.54125e-06	1.23518e-06	1.36662e-06
H19	0.00216485	1.63943e-05	0.000149657	0.0106121	0.000250504	0.0187362	0.000136459	0.466209	0.000127056	0.0277184	0.000106179	1.96307e-05	6.4564e-05	0.000566058	2.01935e-05	0.00102629	0.00472517	2.47774e-05	0.383332	8.11592e-05	5.49784e-06	0.000212771	0.0060322	0.00357385	4.99333e-06	3.7172e-06	0.000103345
H20	0.000856915	0.0274689	0.00826039	0.000282282	0.00552872	0.000236745	0.0248747	0.00241649	0.459429	0.00632901	0.000299899	3.50152e-05	1.41808e-05	0.00370923	0.000404179	6.42583e-05	0.000149871	0.00600594	8.11592e-05	0.369866	0.000151692	0.000130895	0.00291603	0.000175895	5.15097e-06	9.76759e-07	8.4473e-06
H21	1.1954e-05	0.00718185	0.0294424	1.15132e-05	9.41646e-06	6.56806e-05	0.000138091	6.11832e-06	0.000395233	5.97595e-05	0.464179	0.0188126	0.00890294	2.24379e-06	4.13697e-06	2.80641e-06	0.000204233	3.296e-05	5.49784e-06	0.000151692	0.392049	0.0147528	0.000260012	9.58011e-06	0.00154453	0.000806473	0.00050329
H22	0.00034809	0.00469453	0.0280197	0.000350154	9.91004e-05	0.00401377	0.00217689	0.000365863	0.00430888	0.00182269	0.456884	0.0179469	0.00640714	8.47577e-06	4.58861e-05	0.000174322	0.00904583	0.000122136	0.000212771	0.000130895	0.0147528	0.397167	0.00348549	0.000192607	0.00478675	0.000449664	0.00369442
H23	0.000692735	0.000682105	0.00988049	0.000434454	0.000179994	0.00535926	0.000955325	0.0287013	0.00386506	0.469475	0.00264171	0.00129491	0.00379266	0.000180032	3.33316e-05	0.000426361	0.00279942	6.11336e-05	0.0060322	0.00291603	0.000260012	0.00348549	0.394001	0.016074	0.000119352	0.000227105	0.0043069
H24	0.00132957	2.03157e-05	0.000204938	0.000300834	0.000139575	0.00634615	5.80911e-05	0.0299922	0.000184098	0.48279	9.33714e-05	2.06844e-05	7.80754e-05	0.000182031	9.27745e-06	0.000759079	0.000366417	7.95874e-06	0.00357385	0.000175895	9.58011e-06	0.000192607	0.016074	0.407031	3.59905e-06	5.58919e-06	0.000200524
H25	1.08434e-05	0.000415634	0.00481057	1.16089e-05	7.53887e-06	8.42428e-05	7.96959e-05	3.29739e-05	0.000168008	0.000105448	0.0196032	0.473643	0.0293997	4.99321e-07	1.16965e-06	7.43646e-06	0.000191822	3.54125e-06	4.99333e-06	5.15097e-06	0.00154453	0.00478675	0.000119352	3.59905e-06	0.407922	0.00361909	0.00652509
H26	3.68367e-06	0.000462991	0.00108771	2.24833e-06	2.49108e-06	2.8969e-05	3.36311e-05	4.5701e-05	1.63637e-05	0.000152876	0.00632535	0.0300047	0.482856	4.58387e-07	1.97453e-06	4.93782e-06	4.16187e-05	1.23518e-06	3.7172e-06	9.76759e-07	0.000806473	0.000449664	0.000227105	5.58919e-06	0.00361909	0.406365	0.0162369
H27	0.000132479	0.000222305	0.000982228	8.72326e-05	2.71251e-05	0.000809901	2.68213e-05	0.00203494	3.61372e-05	0.00532248	0.00594003	0.0297641	0.476028	1.9998e-05	6.66789e-06	0.000110256	0.00075323	1.36662e-06	0.000103345	8.4473e-06	0.00050329	0.00369442	0.0043069	0.000200524	0.00652509	0.0162369	0.402335
LDM — ajoene_e_35_LIDI_matrix
	S1	S2	S3	O4	C5	C6	C7	C8	C9	C10	C11	C12	C13	H14	H15	H16	H17	H18	H19	H20	H21	H22	H23	H24	H25	H26	H27
S1	12.9368	0.00325021	0.00151934	0.678767	0.458413	0.467869	0.028953	0.0314953	0.0191079	0.017743	0.000223725	0.00110518	0.000109639	0.0226856	0.0209374	0.0238179	0.0207465	0.00174842	0.00156859	0.00103392	9.78512e-05	0.000107767	0.000808211	0.000978264	0.00185007	6.46228e-05	3.38078e-05		92.2752	31.7241	63.4481
S2	0.00325021	14.5425	0.650336	0.00179346	0.00925039	0.000411589	0.0643789	5.76996e-05	0.57927	0.000128103	0.0389956	0.00349432	0.00192817	0.00120605	0.00132521	0.000742774	3.75575e-05	0.0136059	1.1827e-05	0.026316	0.00624257	0.0155357	5.48637e-06	6.48366e-06	0.000806871	0.000272321	0.000229973
S3	0.00151934	0.650336	14.6359	0.000820723	0.00183133	0.000140113	0.0155197	4.43014e-05	0.042436	4.7237e-05	0.526651	0.0427004	0.0195104	0.000246146	0.000106587	0.000256713	1.03939e-05	0.00146732	0.000100774	0.00814821	0.026355	0.0284137	3.17496e-06	2.86449e-06	0.00486377	0.00146163	0.00102636
O4	0.678767	0.00179346	0.000820723	8.32408	0.0615736	0.0604794	0.0115221	0.0103315	0.0169184	0.00313689	0.00102116	0.0130757	0.00150072	0.00471409	0.00847455	0.00435057	0.00845752	0.000563164	0.00540958	0.00845958	0.000379647	6.17529e-05	0.000369615	0.000177803	0.0284936	0.00085844	0.0003607
C5	0.458413	0.00925039	0.00183133	0.0615736	4.06497	0.0235194	0.520687	0.00497653	0.034702	0.00204388	0.000137067	9.43925e-05	3.09622e-05	0.463436	0.469724	0.00317706	0.0029744	0.0186686	0.000202629	0.0044557	3.41596e-05	2.52883e-05	0.000111219	0.000236897	0.000228156	2.07157e-05	5.80289e-06
C6	0.467869	0.000411589	0.000140113	0.0604794	0.0235194	4.06985	0.0106862	0.516854	0.00313118	0.0384681	0.000156132	0.0015148	0.000406191	0.00447482	0.00239128	0.45279	0.466364	0.0020116	0.0185819	0.000192732	2.28307e-05	0.00030453	0.00637653	0.00642836	0.00206426	0.000114763	3.69043e-05
C7	0.028953	0.0643789	0.0155197	0.0115221	0.520687	0.0106862	3.95836	0.00104512	0.867631	0.000437207	0.0015609	0.000866585	0.000189212	0.0185947	0.0185014	0.0134859	0.00065491	0.468992	3.49869e-05	0.023282	0.00046166	0.000321073	2.55345e-05	6.16115e-05	0.00199872	8.46694e-06	4.76785e-05
C8	0.0314953	5.76996e-05	4.43014e-05	0.0103315	0.00497653	0.516854	0.00104512	3.98051	0.000299223	0.922522	7.28841e-05	0.00224798	0.00202006	0.00100431	0.000269751	0.0178014	0.0179413	0.000261734	0.464442	1.99888e-05	1.65532e-05	4.22682e-05	0.0307323	0.0300856	0.000896303	0.000802742	4.61289e-05
C9	0.0191079	0.57927	0.042436	0.0169184	0.034702	0.00313118	0.867631	0.000299223	4.08797	0.000681975	0.00276907	0.00326245	0.000504462	0.00683518	0.00475201	0.00494387	0.000204073	0.0291774	1.76193e-05	0.458272	0.000511253	0.000893656	2.74575e-05	3.4394e-05	0.00554634	5.03676e-05	0.000138255
C10	0.017743	0.000128103	4.7237e-05	0.00313689	0.00204388	0.0384681	0.000437207	0.922522	0.000681975	4.08053	2.01629e-05	0.000285209	0.000193233	0.000587948	6.79003e-05	0.00852092	0.00647859	9.90306e-05	0.0275603	1.7815e-05	3.94494e-06	1.97357e-05	0.48192	0.483115	0.000132736	8.171e-05	4.61024e-06
C11	0.000223725	0.0389956	0.526651	0.00102116	0.000137067	0.000156132	0.0015609	7.28841e-05	0.00276907	2.01629e-05	4.0189	0.516373	0.0380742	4.00396e-05	1.82252e-05	0.000618943	8.98631e-06	0.000132437	0.000216598	0.000274877	0.465436	0.459747	2.99788e-06	1.76723e-06	0.0170534	0.00639458	0.0064809
C12	0.00110518	0.00349432	0.0427004	0.0130757	9.43925e-05	0.0015148	0.000866585	0.00224798	0.00326245	0.000285209	0.516373	3.99715	0.919729	1.81978e-05	1.58397e-05	0.00273415	9.96274e-05	4.36539e-05	0.00512352	0.000457465	0.018638	0.0187187	8.72561e-05	2.96908e-05	0.446162	0.0301575	0.0308441
C13	0.000109639	0.00192817	0.0195104	0.00150072	3.09622e-05	0.000406191	0.000189212	0.00202006	0.000504462	0.000193233	0.0380742	0.919729	4.09244	4.24532e-06	7.79946e-06	0.000662696	6.17532e-05	1.4457e-05	0.00581442	5.81732e-05	0.00680425	0.0101827	8.48939e-05	3.31454e-05	0.0256293	0.482434	0.482614
H14	0.0226856	0.00120605	0.000246146	0.00471409	0.463436	0.00447482	0.0185947	0.00100431	0.00683518	0.000587948	4.00396e-05	1.81978e-05	4.24532e-06	0.384501	0.0150775	0.000211966	0.000290219	0.0031859	2.15879e-05	0.00161593	1.12286e-05	5.58391e-06	2.81902e-05	6.28648e-05	2.74683e-05	7.97066e-07	1.02844e-06
H15	0.0209374	0.00132521	0.000106587	0.00847455	0.469724	0.00239128	0.0185014	0.000269751	0.00475201	6.79003e-05	1.82252e-05	1.58397e-05	7.79946e-06	0.0150775	0.402172	0.000131473	0.00193203	0.002811	7.97608e-05	0.000299352	1.25624e-06	1.97936e-06	1.04225e-05	6.75129e-06	3.77059e-05	5.63717e-06	5.65462e-07
H16	0.0238179	0.000742774	0.000256713	0.00435057	0.00317706	0.45279	0.0134859	0.0178014	0.00494387	0.00852092	0.000618943	0.00273415	0.000662696	0.000211966	0.000131473	0.372486	0.014199	0.00300293	0.00137951	0.000128915	5.48559e-05	0.0006206	0.000449658	0.000720451	0.00270047	3.60472e-05	6.83552e-05
H17	0.0207465	3.75575e-05	1.03939e-05	0.00845752	0.0029744	0.466364	0.00065491	0.0179413	0.000204073	0.00647859	8.98631e-06	9.96274e-05	6.17532e-05	0.000290219	0.00193203	0.014199	0.40469	0.000310413	0.00483582	2.67367e-05	8.33879e-07	1.87178e-05	0.00401958	0.000472639	0.000177529	4.24329e-05	5.62297e-06
H18	0.00174842	0.0136059	0.00146732	0.000563164	0.0186686	0.0020116	0.468992	0.000261734	0.0291774	9.90306e-05	0.000132437	4.36539e-05	1.4457e-05	0.0031859	0.002811	0.00300293	0.000310413	0.401663	1.45776e-05	0.00596157	2.23587e-05	8.61183e-05	5.79276e-06	1.24777e-05	6.81803e-05	7.52948e-07	2.29505e-06
H19	0.00156859	1.1827e-05	0.000100774	0.00540958	0.000202629	0.0185819	3.49869e-05	0.464442	1.76193e-05	0.0275603	0.000216598	0.00512352	0.00581442	2.15879e-05	7.97608e-05	0.00137951	0.00483582	1.45776e-05	0.381756	3.92731e-06	3.95168e-05	7.35707e-05	0.00638086	0.00349479	0.00139843	0.00201929	0.000222504
H20	0.00103392	0.026316	0.00814821	0.00845958	0.0044557	0.000192732	0.023282	1.99888e-05	0.458272	1.7815e-05	0.000274877	0.000457465	5.81732e-05	0.00161593	0.000299352	0.000128915	2.67367e-05	0.00596157	3.92731e-06	0.356045	5.30723e-05	0.000133293	1.17068e-06	1.19917e-06	0.000908078	8.89682e-06	1.96753e-05
H21	9.78512e-05	0.00624257	0.026355	0.000379647	3.41596e-05	2.28307e-05	0.00046166	1.65532e-05	0.000511253	3.94494e-06	0.465436	0.018638	0.00680425	1.12286e-05	1.25624e-06	5.48559e-05	8.33879e-07	2.23587e-05	3.95168e-05	5.30723e-05	0.400529	0.0143666	7.9878e-07	1.87031e-07	0.00453244	0.000487735	0.00450523
H22	0.000107767	0.0155357	0.0284137	6.17529e-05	2.52883e-05	0.00030453	0.000321073	4.22682e-05	0.000893656	1.97357e-05	0.459747	0.0187187	0.0101827	5.58391e-06	1.97936e-06	0.0006206	1.87178e-05	8.61183e-05	7.35707e-05	0.000133293	0.0143666	0.386021	1.93154e-06	2.49787e-06	0.000818781	0.000723672	0.000448179
H23	0.000808211	5.48637e-06	3.17496e-06	0.000369615	0.000111219	0.00637653	2.55345e-05	0.0307323	2.74575e-05	0.48192	2.99788e-06	8.72561e-05	8.48939e-05	2.81902e-05	1.04225e-05	0.000449658	0.00401958	5.79276e-06	0.00638086	1.17068e-06	7.9878e-07	1.93154e-06	0.416799	0.0168903	3.47042e-05	4.17689e-05	2.05858e-06
H24	0.000978264	6.48366e-06	2.86449e-06	0.000177803	0.000236897	0.00642836	6.16115e-05	0.0300856	3.4394e-05	0.483115	1.76723e-06	2.96908e-05	3.31454e-05	6.28648e-05	6.75129e-06	0.000720451	0.000472639	1.24777e-05	0.00349479	1.19917e-06	1.87031e-07	2.49787e-06	0.0168903	0.407135	8.36267e-06	1.35926e-05	9.93358e-07
H25	0.00185007	0.000806871	0.00486377	0.0284936	0.000228156	0.00206426	0.00199872	0.000896303	0.00554634	0.000132736	0.0170534	0.446162	0.0256293	2.74683e-05	3.77059e-05	0.00270047	0.000177529	6.81803e-05	0.00139843	0.000908078	0.00453244	0.000818781	3.47042e-05	8.36267e-06	0.342591	0.00330549	0.00595578
H26	6.46228e-05	0.000272321	0.00146163	0.00085844	2.07157e-05	0.000114763	8.46694e-06	0.000802742	5.03676e-05	8.171e-05	0.00639458	0.0301575	0.482434	7.97066e-07	5.63717e-06	3.60472e-05	4.24329e-05	7.52948e-07	0.00201929	8.89682e-06	0.000487735	0.000723672	4.17689e-05	1.35926e-05	0.00330549	0.407799	0.0170971
H27	3.38078e-05	0.000229973	0.00102636	0.0003607	5.80289e-06	3.69043e-05	4.76785e-05	4.61289e-05	0.000138255	4.61024e-06	0.0064809	0.0308441	0.482614	1.02844e-06	5.65462e-07	6.83552e-05	5.62297e-06	2.29505e-06	0.000222504	1.96753e-05	0.00450523	0.000448179	2.05858e-06	9.93358e-07	0.00595578	0.0170971	0.421162
LDM — ajoene_e_36_LIDI_matrix
	S1	S2	S3	O4	C5	C6	C7	C8	C9	C10	C11	C12	C13	H14	H15	H16	H17	H18	H19	H20	H21	H22	H23	H24	H25	H26	H27
S1	12.9359	0.00338668	0.000296172	0.686244	0.463779	0.466249	0.0280535	0.0279929	0.0138585	0.0156179	0.000121027	6.13406e-05	0.000118798	0.0235959	0.0225403	0.019348	0.0232342	0.00346748	0.00255066	0.000768944	3.36901e-05	9.50089e-06	0.00134762	0.000714456	4.6213e-06	2.65676e-05	7.32951e-06		92.2995	31.7014	63.4028
S2	0.00338668	14.5247	0.654515	0.00166799	0.00936719	0.000488933	0.0658617	0.000270313	0.579259	0.000674522	0.0384398	0.00942661	0.00692444	0.00077706	0.00176581	0.00103906	4.18566e-05	0.0106407	4.32143e-05	0.0261356	0.00832796	0.00698954	2.97936e-05	0.000924994	0.000520365	0.000272644	0.00242156
S3	0.000296172	0.654515	14.6341	0.000139613	0.00178879	4.30982e-05	0.0112537	5.31781e-05	0.0410147	0.000249376	0.527147	0.0401018	0.0222353	0.000108886	0.000473281	6.94382e-05	4.54368e-06	0.00125417	1.18196e-05	0.0120255	0.0269203	0.0291346	1.55639e-05	0.000582386	0.00611791	0.00151467	0.00130035
O4	0.686244	0.00166799	0.000139613	8.37082	0.062802	0.0616679	0.00947175	0.0133772	0.00522774	0.00299059	5.06271e-05	2.93971e-05	5.02953e-05	0.00535033	0.00551151	0.00832901	0.00392279	0.000637957	0.0125346	0.000226214	1.06803e-05	4.04022e-06	0.00031744	0.000514158	3.21672e-06	9.30623e-06	3.33301e-06
C5	0.463779	0.00936719	0.00178879	0.062802	4.06277	0.0231739	0.520301	0.00850494	0.0364079	0.00386424	0.000136954	0.000118808	0.000238572	0.456001	0.463623	0.00177377	0.00505162	0.0185654	0.00030021	0.00547634	5.36828e-05	1.16229e-05	0.000142432	0.000170108	1.39921e-05	9.98735e-05	1.26871e-05
C6	0.466249	0.000488933	4.30982e-05	0.0616679	0.0231739	4.07272	0.00723203	0.51732	0.0048162	0.0370563	1.2188e-05	1.69964e-05	3.0594e-05	0.00316518	0.00465279	0.460984	0.46395	0.000276574	0.0186043	0.000387	4.40491e-06	1.55724e-06	0.00635517	0.00598892	1.01412e-06	4.14286e-06	1.3391e-06
C7	0.0280535	0.0658617	0.0112537	0.00947175	0.520301	0.00723203	3.96107	0.0010854	0.872581	0.000855144	0.00177518	0.00232265	0.00437926	0.0174212	0.0188238	0.0083951	0.00075947	0.470594	0.000126536	0.0237247	0.00062515	0.000172314	3.14332e-05	0.000566171	8.59565e-05	0.000305652	0.000251943
C8	0.0279929	0.000270313	5.31781e-05	0.0133772	0.00850494	0.51732	0.0010854	3.97745	0.00177069	0.915654	3.0385e-06	2.69586e-06	3.70371e-06	0.010989	0.000717894	0.0173256	0.0193441	0.000178588	0.464902	0.00289516	5.41803e-07	1.16066e-06	0.0301432	0.0300742	1.99966e-06	6.34144e-07	2.79332e-07
C9	0.0138585	0.579259	0.0410147	0.00522774	0.0364079	0.0048162	0.872581	0.00177069	4.08981	0.00402308	0.00212372	0.00794753	0.00811682	0.00589996	0.00844789	0.00759825	0.000337172	0.0294267	0.000147126	0.456556	0.000437109	0.000301252	0.000126769	0.00286271	0.000595115	0.000275388	0.00034797
C10	0.0156179	0.000674522	0.000249376	0.00299059	0.00386424	0.0370563	0.000855144	0.915654	0.00402308	4.08452	6.72723e-06	6.63238e-06	3.94438e-06	0.00700263	0.00029115	0.00562787	0.0105699	0.000199197	0.0276367	0.00732573	4.91958e-07	4.25834e-06	0.483536	0.478838	5.40136e-06	5.04238e-07	5.49656e-07
C11	0.000121027	0.0384398	0.527147	5.06271e-05	0.000136954	1.2188e-05	0.00177518	3.0385e-06	0.00212372	6.72723e-06	4.0126	0.516939	0.0366501	6.6859e-06	7.43943e-05	2.49896e-05	1.46954e-06	8.88502e-05	2.93971e-07	0.000316986	0.463891	0.463192	3.58561e-07	3.17963e-05	0.0199292	0.00628206	0.00631544
C12	6.13406e-05	0.00942661	0.0401018	2.93971e-05	0.000118808	1.69964e-05	0.00232265	2.69586e-06	0.00794753	6.63238e-06	0.516939	3.96823	0.914719	2.45199e-05	4.53805e-05	2.5792e-05	1.2091e-06	8.00275e-05	5.4528e-07	0.00134241	0.019149	0.0182876	4.31509e-07	9.32859e-06	0.47322	0.03016	0.0299518
C13	0.000118798	0.00692444	0.0222353	5.02953e-05	0.000238572	3.0594e-05	0.00437926	3.70371e-06	0.00811682	3.94438e-06	0.0366501	0.914719	4.07148	3.26136e-05	9.24711e-05	3.91894e-05	2.91023e-06	0.000189588	7.93088e-07	0.00047261	0.00895725	0.00621811	3.69572e-07	5.26305e-06	0.0290818	0.483202	0.479877
H14	0.0235959	0.00077706	0.000108886	0.00535033	0.456001	0.00316518	0.0174212	0.010989	0.00589996	0.00700263	6.6859e-06	2.45199e-05	3.26136e-05	0.376003	0.0140852	0.000106787	0.000235241	0.00466491	0.000713779	0.00343474	2.40063e-06	2.4599e-06	0.000197742	0.000208356	8.93893e-06	1.43621e-05	2.80529e-06
H15	0.0225403	0.00176581	0.000473281	0.00551151	0.463623	0.00465279	0.0188238	0.000717894	0.00844789	0.00029115	7.43943e-05	4.53805e-05	9.24711e-05	0.0140852	0.390857	0.000209433	0.000980541	0.00150982	2.24389e-05	0.000428478	3.23175e-05	7.32554e-06	8.9487e-06	2.13164e-05	2.09107e-06	4.77943e-05	5.48912e-06
H16	0.019348	0.00103906	6.94382e-05	0.00832901	0.00177377	0.460984	0.0083951	0.0173256	0.00759825	0.00562787	2.49896e-05	2.5792e-05	3.91894e-05	0.000106787	0.000209433	0.38604	0.0144038	0.000223239	0.00479212	0.000397832	6.51271e-06	1.91183e-06	0.000409899	0.00339967	7.46557e-07	1.24653e-06	1.73412e-06
H17	0.0232342	4.18566e-05	4.54368e-06	0.00392279	0.00505162	0.46395	0.00075947	0.0193441	0.000337172	0.0105699	1.46954e-06	1.2091e-06	2.91023e-06	0.000235241	0.000980541	0.0144038	0.391177	1.77375e-05	0.000886874	7.46018e-05	3.93988e-07	1.50462e-07	0.000756271	0.000458188	2.40696e-07	1.7001e-06	1.50041e-07
H18	0.00346748	0.0106407	0.00125417	0.000637957	0.0185654	0.000276574	0.470594	0.000178588	0.0294267	0.000199197	8.88502e-05	8.00275e-05	0.000189588	0.00466491	0.00150982	0.000223239	1.77375e-05	0.402578	1.94029e-05	0.00594027	2.30592e-05	2.06712e-05	8.13373e-06	6.87439e-05	1.80736e-05	5.90932e-06	4.88558e-05
H19	0.00255066	4.32143e-05	1.18196e-05	0.0125346	0.00030021	0.0186043	0.000126536	0.464902	0.000147126	0.0276367	2.93971e-07	5.4528e-07	7.93088e-07	0.000713779	2.24389e-05	0.00479212	0.000886874	1.94029e-05	0.381058	0.000107932	4.54797e-08	9.70057e-08	0.0035353	0.00636157	7.90205e-08	4.79468e-08	3.06587e-08
H20	0.000768944	0.0261356	0.0120255	0.000226214	0.00547634	0.000387	0.0237247	0.00289516	0.456556	0.00732573	0.000316986	0.00134241	0.00047261	0.00343474	0.000428478	0.000397832	7.46018e-05	0.00594027	0.000107932	0.364153	1.94484e-05	0.000176658	0.000217131	0.00364215	0.000480809	1.74617e-05	3.20714e-05
H21	3.36901e-05	0.00832796	0.0269203	1.06803e-05	5.36828e-05	4.40491e-06	0.00062515	5.41803e-07	0.000437109	4.91958e-07	0.463891	0.019149	0.00895725	2.40063e-06	3.23175e-05	6.51271e-06	3.93988e-07	2.30592e-05	4.54797e-08	1.94484e-05	0.396372	0.0144721	3.47792e-08	1.85052e-06	0.00151526	0.00078857	0.000484739
H22	9.50089e-06	0.00698954	0.0291346	4.04022e-06	1.16229e-05	1.55724e-06	0.000172314	1.16066e-06	0.000301252	4.25834e-06	0.463192	0.0182876	0.00621811	2.4599e-06	7.32554e-06	1.91183e-06	1.50462e-07	2.06712e-05	9.70057e-08	0.000176658	0.0144721	0.391784	1.92463e-07	1.47655e-05	0.00512948	0.000447131	0.00411942
H23	0.00134762	2.97936e-05	1.55639e-05	0.00031744	0.000142432	0.00635517	3.14332e-05	0.0301432	0.000126769	0.483536	3.58561e-07	4.31509e-07	3.69572e-07	0.000197742	8.9487e-06	0.000409899	0.000756271	8.13373e-06	0.0035353	0.000217131	3.47792e-08	1.92463e-07	0.409552	0.0168547	2.76413e-07	2.98758e-08	3.08445e-08
H24	0.000714456	0.000924994	0.000582386	0.000514158	0.000170108	0.00598892	0.000566171	0.0300742	0.00286271	0.478838	3.17963e-05	9.32859e-06	5.26305e-06	0.000208356	2.13164e-05	0.00339967	0.000458188	6.87439e-05	0.00636157	0.00364215	1.85052e-06	1.47655e-05	0.0168547	0.411084	2.57881e-06	1.65243e-07	7.54934e-07
H25	4.6213e-06	0.000520365	0.00611791	3.21672e-06	1.39921e-05	1.01412e-06	8.59565e-05	1.99966e-06	0.000595115	5.40136e-06	0.0199292	0.47322	0.0290818	8.93893e-06	2.09107e-06	7.46557e-07	2.40696e-07	1.80736e-05	7.90205e-08	0.000480809	0.00151526	0.00512948	2.76413e-07	2.57881e-06	0.41293	0.00365283	0.00677289
H26	2.65676e-05	0.000272644	0.00151467	9.30623e-06	9.98735e-05	4.14286e-06	0.000305652	6.34144e-07	0.000275388	5.04238e-07	0.00628206	0.03016	0.483202	1.43621e-05	4.77943e-05	1.24653e-06	1.7001e-06	5.90932e-06	4.79468e-08	1.74617e-05	0.00078857	0.000447131	2.98758e-08	1.65243e-07	0.00365283	0.409684	0.0167014
H27	7.32951e-06	0.00242156	0.00130035	3.33301e-06	1.26871e-05	1.3391e-06	0.000251943	2.79332e-07	0.00034797	5.49656e-07	0.00631544	0.0299518	0.479877	2.80529e-06	5.48912e-06	1.73412e-06	1.50041e-07	4.88558e-05	3.06587e-08	3.20714e-05	0.000484739	0.00411942	3.08445e-08	7.54934e-07	0.00677289	0.0167014	0.410078
LDM — ajoene_e_37_LIDI_matrix
	S1	S2	S3	O4	C5	C6	C7	C8	C9	C10	C11	C12	C13	H14	H15	H16	H17	H18	H19	H20	H21	H22	H23	H24	H25	H26	H27
S1	12.9284	0.00381001	0.000567787	0.686735	0.463241	0.466837	0.0282126	0.0274308	0.0150763	0.014112	0.000132866	1.44698e-05	1.75149e-05	0.0190925	0.0228383	0.0227815	0.0236429	0.00238397	0.00449079	0.000605155	2.33519e-05	7.7196e-05	0.000856363	0.000941051	2.37709e-06	5.03131e-07	3.21031e-05		92.3068	31.6932	63.3864
S2	0.00381001	14.5226	0.644852	0.000864409	0.00920055	0.000432294	0.0611328	0.00016154	0.577192	0.000646211	0.0376998	0.0154843	0.0145447	0.000846246	0.00139479	4.22702e-05	0.000843778	0.0114782	5.9366e-05	0.0283091	0.00875846	0.00396487	0.0015897	4.18418e-05	0.000495896	0.00038722	0.00206747
S3	0.000567787	0.644852	14.6473	0.000146293	0.00191042	0.00014768	0.0178317	1.60634e-05	0.0448621	3.84351e-05	0.526525	0.040669	0.0237127	9.94884e-05	0.00094533	1.01345e-05	0.000212474	0.00126829	3.37636e-06	0.00849835	0.0267981	0.0291848	7.70765e-05	1.42426e-06	0.00597643	0.00154506	0.00138186
O4	0.686735	0.000864409	0.000146293	8.36908	0.0622483	0.0628809	0.0135047	0.00948589	0.00301216	0.00530756	2.5216e-05	5.10556e-06	1.30461e-05	0.00832831	0.00409003	0.00526406	0.00536998	0.0116921	0.000787468	0.000488497	4.84677e-06	1.44291e-05	0.000295314	0.000601667	1.08312e-06	7.89198e-07	5.54111e-05
C5	0.463241	0.00920055	0.00191042	0.0622483	4.06895	0.0232927	0.517803	0.00729471	0.035888	0.00417535	0.000144826	2.01229e-05	2.93595e-05	0.461538	0.463833	0.00476958	0.00297879	0.0171724	0.000331468	0.00545163	2.28934e-05	0.000130717	0.000240596	0.0001105	6.82541e-06	1.05948e-06	0.000103727
C6	0.466837	0.000432294	0.00014768	0.0628809	0.0232927	4.07316	0.00879248	0.519829	0.00405338	0.0368893	1.80676e-05	2.35562e-06	2.71657e-06	0.00177237	0.00497262	0.462826	0.45619	0.000287903	0.0198374	0.000180111	2.59808e-06	2.51092e-05	0.00583121	0.00631181	8.50819e-07	1.62567e-07	6.39336e-06
C7	0.0282126	0.0611328	0.0178317	0.0135047	0.517803	0.00879248	3.95897	0.0012797	0.872688	0.00158283	0.00222916	0.000370461	0.000853945	0.0174634	0.0193939	0.000762269	0.0105234	0.45878	0.000176087	0.0252772	0.000373704	0.00327844	0.00170694	7.9585e-05	0.000118501	7.01547e-05	0.00176493
C8	0.0274308	0.00016154	1.60634e-05	0.00948589	0.00729471	0.519829	0.0012797	3.98337	0.0012245	0.916582	3.17931e-06	8.38648e-07	9.16375e-07	0.00879338	0.000734192	0.0189925	0.0171778	0.000133566	0.47407	0.00114232	4.63591e-07	2.93794e-06	0.0293999	0.0301695	1.55276e-07	4.06827e-08	1.36582e-06
C9	0.0150763	0.577192	0.0448621	0.00301216	0.035888	0.00405338	0.872688	0.0012245	4.09306	0.00439518	0.00481709	0.000751637	0.000618836	0.00566728	0.00929761	0.000306892	0.00701974	0.0267302	0.000179326	0.463229	0.000526123	0.00570072	0.00557621	0.000234233	0.00017434	3.73129e-05	0.000838067
C10	0.014112	0.000646211	3.84351e-05	0.00530756	0.00417535	0.0368893	0.00158283	0.916582	0.00439518	4.07929	8.01598e-06	2.20184e-06	2.21522e-06	0.00665502	0.000268387	0.0100416	0.00563101	0.000144325	0.0297559	0.00355705	1.228e-06	6.00146e-06	0.475988	0.483281	2.51473e-07	1.36194e-07	2.15706e-06
C11	0.000132866	0.0376998	0.526525	2.5216e-05	0.000144826	1.80676e-05	0.00222916	3.17931e-06	0.00481709	8.01598e-06	4.01115	0.517608	0.0369567	7.89082e-06	6.63254e-05	2.0041e-06	3.10816e-05	0.000142736	9.5814e-07	0.000296592	0.464649	0.461265	3.98423e-05	4.38013e-07	0.0199375	0.00626963	0.00627094
C12	1.44698e-05	0.0154843	0.040669	5.10556e-06	2.01229e-05	2.35562e-06	0.000370461	8.38648e-07	0.000751637	2.20184e-06	0.517608	3.9659	0.916047	5.07874e-06	1.19291e-05	2.84174e-07	3.47576e-06	0.000215465	1.31384e-07	0.000210614	0.0190147	0.0183462	6.53234e-06	1.16004e-07	0.473505	0.0301166	0.0300241
C13	1.75149e-05	0.0145447	0.0237127	1.30461e-05	2.93595e-05	2.71657e-06	0.000853945	9.16375e-07	0.000618836	2.21522e-06	0.0369567	0.916047	4.07503	9.98911e-06	1.49415e-05	3.63951e-07	3.86849e-06	0.00093701	2.10474e-07	0.000161703	0.00867471	0.0062998	5.35458e-06	1.4113e-07	0.0290137	0.483513	0.479306
H14	0.0190925	0.000846246	9.94884e-05	0.00832831	0.461538	0.00177237	0.0174634	0.00879338	0.00566728	0.00665502	7.89082e-06	5.07874e-06	9.98911e-06	0.385513	0.0143031	0.000214107	0.000103174	0.00462369	0.000312773	0.0035257	9.00186e-07	5.14496e-06	0.000239235	0.000159675	4.23517e-07	2.9744e-07	2.98221e-05
H15	0.0228383	0.00139479	0.00094533	0.00409003	0.463833	0.00497262	0.0193939	0.000734192	0.00929761	0.000268387	6.63254e-05	1.19291e-05	1.49415e-05	0.0143031	0.390599	0.000974649	0.000217835	0.000906402	1.9812e-05	0.000393556	1.77925e-05	6.36376e-05	4.36513e-05	6.49855e-06	4.52975e-06	1.47536e-06	1.69305e-05
H16	0.0227815	4.22702e-05	1.01345e-05	0.00526406	0.00476958	0.462826	0.000762269	0.0189925	0.000306892	0.0100416	2.0041e-06	2.84174e-07	3.63951e-07	0.000214107	0.000974649	0.387894	0.0140534	2.14755e-05	0.00129403	3.63444e-05	3.74107e-07	2.02532e-06	0.000475119	0.00078583	7.01871e-08	1.98344e-08	7.86586e-07
H17	0.0236429	0.000843778	0.000212474	0.00536998	0.00297879	0.45619	0.0105234	0.0171778	0.00701974	0.00563101	3.10816e-05	3.47576e-06	3.86849e-06	0.000103174	0.000217835	0.0140534	0.376476	0.000668433	0.00494329	0.000180566	7.56869e-06	3.02608e-05	0.0033777	0.000395153	9.36051e-07	1.95612e-07	5.8515e-06
H18	0.00238397	0.0114782	0.00126829	0.0116921	0.0171724	0.000287903	0.45878	0.000133566	0.0267302	0.000144325	0.000142736	0.000215465	0.00093701	0.00462369	0.000906402	2.14755e-05	0.000668433	0.366105	2.26447e-05	0.00573661	1.70247e-05	0.000123386	7.52149e-05	4.34679e-06	4.45771e-05	5.71408e-05	0.00136006
H19	0.00449079	5.9366e-05	3.37636e-06	0.000787468	0.000331468	0.0198374	0.000176087	0.47407	0.000179326	0.0297559	9.5814e-07	1.31384e-07	2.10474e-07	0.000312773	1.9812e-05	0.00129403	0.00494329	2.26447e-05	0.411021	6.85594e-05	1.62247e-07	9.47102e-07	0.00658945	0.00370894	2.66395e-08	9.39151e-09	2.26698e-07
H20	0.000605155	0.0283091	0.00849835	0.000488497	0.00545163	0.000180111	0.0252772	0.00114232	0.463229	0.00355705	0.000296592	0.000210614	0.000161703	0.0035257	0.000393556	3.63444e-05	0.000180566	0.00573661	6.85594e-05	0.381552	1.70143e-05	0.000190563	0.00286729	9.76824e-05	1.44429e-05	7.45519e-06	5.27414e-05
H21	2.33519e-05	0.00875846	0.0267981	4.84677e-06	2.28934e-05	2.59808e-06	0.000373704	4.63591e-07	0.000526123	1.228e-06	0.464649	0.0190147	0.00867471	9.00186e-07	1.77925e-05	3.74107e-07	7.56869e-06	1.70247e-05	1.62247e-07	1.70143e-05	0.398151	0.0146718	8.11453e-06	7.13406e-08	0.00156856	0.000800244	0.000494947
H22	7.7196e-05	0.00396487	0.0291848	1.44291e-05	0.000130717	2.51092e-05	0.00327844	2.93794e-06	0.00570072	6.00146e-06	0.461265	0.0183462	0.0062998	5.14496e-06	6.36376e-05	2.02532e-06	3.02608e-05	0.000123386	9.47102e-07	0.000190563	0.0146718	0.393355	1.12028e-05	4.98603e-07	0.00502576	0.00044993	0.00410902
H23	0.000856363	0.0015897	7.70765e-05	0.000295314	0.000240596	0.00583121	0.00170694	0.0293999	0.00557621	0.475988	3.98423e-05	6.53234e-06	5.35458e-06	0.000239235	4.36513e-05	0.000475119	0.0033777	7.52149e-05	0.00658945	0.00286729	8.11453e-06	1.12028e-05	0.399407	0.0163364	3.22931e-07	2.80896e-07	3.18024e-06
H24	0.000941051	4.18418e-05	1.42426e-06	0.000601667	0.0001105	0.00631181	7.9585e-05	0.0301695	0.000234233	0.483281	4.38013e-07	1.16004e-07	1.4113e-07	0.000159675	6.49855e-06	0.00078583	0.000395153	4.34679e-06	0.00370894	9.76824e-05	7.13406e-08	4.98603e-07	0.0163364	0.407965	2.10252e-08	1.23473e-08	2.20444e-07
H25	2.37709e-06	0.000495896	0.00597643	1.08312e-06	6.82541e-06	8.50819e-07	0.000118501	1.55276e-07	0.00017434	2.51473e-07	0.0199375	0.473505	0.0290137	4.23517e-07	4.52975e-06	7.01871e-08	9.36051e-07	4.45771e-05	2.66395e-08	1.44429e-05	0.00156856	0.00502576	3.22931e-07	2.10252e-08	0.411948	0.00361561	0.00670615
H26	5.03131e-07	0.00038722	0.00154506	7.89198e-07	1.05948e-06	1.62567e-07	7.01547e-05	4.06827e-08	3.73129e-05	1.36194e-07	0.00626963	0.0301166	0.483513	2.9744e-07	1.47536e-06	1.98344e-08	1.95612e-07	5.71408e-05	9.39151e-09	7.45519e-06	0.000800244	0.00044993	2.80896e-07	1.23473e-08	0.00361561	0.409548	0.0166833
H27	3.21031e-05	0.00206747	0.00138186	5.54111e-05	0.000103727	6.39336e-06	0.00176493	1.36582e-06	0.000838067	2.15706e-06	0.00627094	0.0300241	0.479306	2.98221e-05	1.69305e-05	7.86586e-07	5.8515e-06	0.00136006	2.26698e-07	5.27414e-05	0.000494947	0.00410902	3.18024e-06	2.20444e-07	0.00670615	0.0166833	0.410959
LDM — ajoene_e_38_LIDI_matrix
	S1	S2	S3	O4	C5	C6	C7	C8	C9	C10	C11	C12	C13	H14	H15	H16	H17	H18	H19	H20	H21	H22	H23	H24	H25	H26	H27
S1	12.9381	0.00256588	0.00178139	0.683953	0.459227	0.468771	0.0274461	0.031386	0.0169059	0.0155249	0.000135053	0.00056769	0.000451778	0.0191003	0.0218275	0.0203245	0.0231658	0.001518	0.00254079	0.00076033	8.84767e-05	1.55225e-05	0.000682924	0.000989509	0.000785221	2.26829e-05	0.000209372		92.2915	31.7083	63.4165
S2	0.00256588	14.5472	0.651861	0.000776657	0.0093083	0.000321288	0.0607481	5.79931e-05	0.574993	0.00010241	0.0385482	0.00498295	0.00178403	0.000930387	0.00187488	3.95859e-05	0.000564012	0.0125761	4.16522e-06	0.0285675	0.00799138	0.0092286	4.26931e-06	4.97242e-06	0.00304148	0.000263901	0.000149522
S3	0.00178139	0.651861	14.6408	0.000326589	0.00184211	0.00021715	0.0165985	0.000107431	0.0437229	6.93026e-05	0.52779	0.0407957	0.0233479	0.00010087	0.000214011	1.54372e-05	0.000701182	0.00122178	1.30283e-05	0.00694117	0.0265469	0.0298486	2.80163e-06	3.56135e-06	0.00182663	0.00118218	0.00140871
O4	0.683953	0.000776657	0.000326589	8.34932	0.0616601	0.0616829	0.0196348	0.0114499	0.00383543	0.00283463	0.000310036	0.00290985	0.000376732	0.00777659	0.00276134	0.00855331	0.00460499	0.00960827	0.00950416	0.000367689	0.000100327	3.57971e-05	0.000464917	0.000218026	0.00769734	9.60774e-05	0.000197539
C5	0.459227	0.0093083	0.00184211	0.0616601	4.06657	0.024901	0.517682	0.0048658	0.036166	0.00190371	0.000120754	0.000115934	7.5583e-05	0.465785	0.466378	0.00320574	0.00369489	0.0174566	0.000247857	0.00538484	4.62335e-05	8.47258e-06	0.000106247	0.000252765	0.000190514	5.04317e-06	1.93222e-05
C6	0.468771	0.000321288	0.00021715	0.0616829	0.024901	4.07532	0.00513629	0.515958	0.00366251	0.0378938	0.000158082	0.00306469	0.00256013	0.00566555	0.00462152	0.466304	0.4476	0.000202072	0.018569	0.000733213	4.04226e-05	1.48077e-05	0.00628345	0.00640748	0.00235951	7.74783e-05	0.00141781
C7	0.0274461	0.0607481	0.0165985	0.0196348	0.517682	0.00513629	3.94438	0.000671359	0.876129	0.000316255	0.0014508	0.00230137	0.000714907	0.0179049	0.0194068	0.000355323	0.00656094	0.46056	3.11167e-05	0.0259564	0.00066571	0.000118755	1.85432e-05	4.12466e-05	0.00441841	0.000109906	4.78599e-05
C8	0.031386	5.79931e-05	0.000107431	0.0114499	0.0048658	0.515958	0.000671359	3.97764	0.000482498	0.920124	0.000125117	0.000775875	0.00485083	0.000622366	0.000923645	0.0179995	0.0175399	2.52729e-05	0.463898	0.000119679	1.82799e-05	9.12519e-06	0.0305798	0.0301864	0.0003547	0.000357352	0.0110136
C9	0.0169059	0.574993	0.0437229	0.00383543	0.036166	0.00366251	0.876129	0.000482498	4.08968	0.000666017	0.00208608	0.00448218	0.000945118	0.00576343	0.00825357	0.00019729	0.00771799	0.027	1.32769e-05	0.466188	0.000449298	0.000343657	2.54245e-05	3.92397e-05	0.00548306	0.000126354	6.3207e-05
C10	0.0155249	0.00010241	6.93026e-05	0.00283463	0.00190371	0.0378938	0.000316255	0.920124	0.000666017	4.08025	7.67479e-05	0.000235046	0.00133111	9.8479e-05	0.000458658	0.00628573	0.00970361	8.79073e-06	0.027757	5.3994e-05	6.74922e-06	4.56915e-06	0.481813	0.483192	0.000124132	0.000118643	0.00367551
C11	0.000135053	0.0385482	0.52779	0.000310036	0.000120754	0.000158082	0.0014508	0.000125117	0.00208608	7.67479e-05	4.01302	0.515892	0.0374648	1.30745e-05	4.0742e-05	1.41505e-05	0.000400437	0.000139314	7.97944e-05	0.000309945	0.463464	0.463595	3.23444e-06	3.18416e-06	0.0181676	0.00663866	0.00613838
C12	0.00056769	0.00498295	0.0407957	0.00290985	0.000115934	0.00306469	0.00230137	0.000775875	0.00448218	0.000235046	0.515892	3.97857	0.917916	7.69929e-06	3.0081e-05	0.000177281	0.00804727	0.000176001	0.000406216	0.000216136	0.0185059	0.0188865	1.49082e-05	1.28773e-05	0.461912	0.0305006	0.0294124
C13	0.000451778	0.00178403	0.0233479	0.000376732	7.5583e-05	0.00256013	0.000714907	0.00485083	0.000945118	0.00133111	0.0374648	0.917916	4.08566	4.04755e-06	3.13465e-05	0.000113842	0.00563992	4.98325e-05	0.00276265	4.43488e-05	0.00704496	0.00793295	6.87499e-05	4.49303e-05	0.0276689	0.481499	0.475138
H14	0.0191003	0.000930387	0.00010087	0.00777659	0.465785	0.00566555	0.0179049	0.000622366	0.00576343	9.8479e-05	1.30745e-05	7.69929e-06	4.04755e-06	0.398477	0.0149762	0.0036104	0.000518038	0.00465771	0.000140121	0.00343664	2.64898e-06	2.8251e-06	1.63337e-05	1.4281e-05	2.2565e-05	3.69044e-07	1.9808e-06
H15	0.0218275	0.00187488	0.000214011	0.00276134	0.466378	0.00462152	0.0194068	0.000923645	0.00825357	0.000458658	4.0742e-05	3.0081e-05	3.13465e-05	0.0149762	0.393176	0.000210641	0.000250464	0.00155956	1.72547e-05	0.000413174	1.46804e-05	3.39443e-06	2.31835e-05	6.55748e-05	4.1084e-05	1.82028e-06	4.6127e-06
H16	0.0203245	3.95859e-05	1.54372e-05	0.00855331	0.00320574	0.466304	0.000355323	0.0179995	0.00019729	0.00628573	1.41505e-05	0.000177281	0.000113842	0.0036104	0.000210641	0.405492	0.0137824	9.68147e-05	0.00499672	0.000128557	2.64639e-06	1.08411e-06	0.00399985	0.000463341	0.000190246	3.17742e-06	9.6623e-05
H17	0.0231658	0.000564012	0.000701182	0.00460499	0.00369489	0.4476	0.00656094	0.0175399	0.00771799	0.00970361	0.000400437	0.00804727	0.00563992	0.000518038	0.000250464	0.0137824	0.360111	0.000130993	0.000882241	0.0013724	8.61306e-05	5.60198e-05	0.000438918	0.000696318	0.00463991	0.0001886	0.00115143
H18	0.001518	0.0125761	0.00122178	0.00960827	0.0174566	0.000202072	0.46056	2.52729e-05	0.027	8.79073e-06	0.000139314	0.000176001	4.98325e-05	0.00465771	0.00155956	9.68147e-05	0.000130993	0.371665	8.54548e-06	0.00597659	2.44862e-05	3.28156e-05	1.08863e-06	1.17347e-06	0.000546061	1.31428e-05	3.73871e-06
H19	0.00254079	4.16522e-06	1.30283e-05	0.00950416	0.000247857	0.018569	3.11167e-05	0.463898	1.32769e-05	0.027757	7.97944e-05	0.000406216	0.00276265	0.000140121	1.72547e-05	0.00499672	0.000882241	8.54548e-06	0.384752	7.5567e-06	1.4389e-05	1.50053e-05	0.00645175	0.00355305	0.000271826	0.000269102	0.00565739
H20	0.00076033	0.0285675	0.00694117	0.000367689	0.00538484	0.000733213	0.0259564	0.000119679	0.466188	5.3994e-05	0.000309945	0.000216136	4.43488e-05	0.00343664	0.000413174	0.000128557	0.0013724	0.00597659	7.5567e-06	0.386117	2.42868e-05	0.000168696	3.10869e-06	5.7659e-06	0.0001167	4.30621e-06	3.42779e-06
H21	8.84767e-05	0.00799138	0.0265469	0.000100327	4.62335e-05	4.04226e-05	0.00066571	1.82799e-05	0.000449298	6.74922e-06	0.463464	0.0185059	0.00704496	2.64898e-06	1.46804e-05	2.64639e-06	8.61306e-05	2.44862e-05	1.4389e-05	2.42868e-05	0.399163	0.0144639	6.18157e-07	4.00601e-07	0.00457351	0.00450992	0.000471623
H22	1.55225e-05	0.0092286	0.0298486	3.57971e-05	8.47258e-06	1.48077e-05	0.000118755	9.12519e-06	0.000343657	4.56915e-06	0.463595	0.0188865	0.00793295	2.8251e-06	3.39443e-06	1.08411e-06	5.60198e-05	3.28156e-05	1.50053e-05	0.000168696	0.0144639	0.388641	3.01553e-07	2.62857e-07	0.00151672	0.000465443	0.00081633
H23	0.000682924	4.26931e-06	2.80163e-06	0.000464917	0.000106247	0.00628345	1.85432e-05	0.0305798	2.54245e-05	0.481813	3.23444e-06	1.49082e-05	6.87499e-05	1.63337e-05	2.31835e-05	0.00399985	0.000438918	1.08863e-06	0.00645175	3.10869e-06	6.18157e-07	3.01553e-07	0.41552	0.016864	1.55595e-05	7.35216e-06	0.00017143
H24	0.000989509	4.97242e-06	3.56135e-06	0.000218026	0.000252765	0.00640748	4.12466e-05	0.0301864	3.92397e-05	0.483192	3.18416e-06	1.28773e-05	4.49303e-05	1.4281e-05	6.55748e-05	0.000463341	0.000696318	1.17347e-06	0.00355305	5.7659e-06	4.00601e-07	2.62857e-07	0.016864	0.407255	8.34385e-06	4.58053e-06	0.000140397
H25	0.000785221	0.00304148	0.00182663	0.00769734	0.000190514	0.00235951	0.00441841	0.0003547	0.00548306	0.000124132	0.0181676	0.461912	0.0276689	2.2565e-05	4.1084e-05	0.000190246	0.00463991	0.000546061	0.000271826	0.0001167	0.00457351	0.00151672	1.55595e-05	8.34385e-06	0.379822	0.00643146	0.00330456
H26	2.26829e-05	0.000263901	0.00118218	9.60774e-05	5.04317e-06	7.74783e-05	0.000109906	0.000357352	0.000126354	0.000118643	0.00663866	0.0305006	0.481499	3.69044e-07	1.82028e-06	3.17742e-06	0.0001886	1.31428e-05	0.000269102	4.30621e-06	0.00450992	0.000465443	7.35216e-06	4.58053e-06	0.00643146	0.417734	0.0162476
H27	0.000209372	0.000149522	0.00140871	0.000197539	1.93222e-05	0.00141781	4.78599e-05	0.0110136	6.3207e-05	0.00367551	0.00613838	0.0294124	0.475138	1.9808e-06	4.6127e-06	9.6623e-05	0.00115143	3.73871e-06	0.00565739	3.42779e-06	0.000471623	0.00081633	0.00017143	0.000140397	0.00330456	0.0162476	0.397033
LDM — ajoene_e_39_LIDI_matrix
	S1	S2	S3	O4	C5	C6	C7	C8	C9	C10	C11	C12	C13	H14	H15	H16	H17	H18	H19	H20	H21	H22	H23	H24	H25	H26	H27
S1	12.9308	0.00302547	0.000585367	0.686752	0.463217	0.466254	0.0279307	0.0279492	0.0137435	0.0157988	0.000120124	1.47562e-05	1.39179e-05	0.0233292	0.0223164	0.0232534	0.0194485	0.00363362	0.00246801	0.000770131	2.34848e-05	7.06261e-05	0.00134343	0.000719929	2.13891e-06	3.30431e-07	1.08108e-05		92.3045	31.6952	63.3905
S2	0.00302547	14.5175	0.645941	0.0016755	0.00919729	0.000416329	0.0631252	0.000258431	0.580085	0.000684656	0.0376304	0.0154399	0.0140092	0.00082269	0.00144375	3.49445e-05	0.000861358	0.0121782	4.19452e-05	0.027243	0.00875364	0.00393107	3.02118e-05	0.000927605	0.000505184	0.000375954	0.00187005
S3	0.000585367	0.645941	14.6416	0.000206267	0.0019204	0.000100098	0.016662	2.37982e-05	0.0444	7.08259e-05	0.526629	0.0405639	0.023409	0.00010866	0.000812538	7.77028e-06	0.000138932	0.00135356	3.2031e-06	0.00920251	0.0267983	0.0291748	3.57108e-06	0.000102826	0.00616139	0.00154928	0.00137345
O4	0.686752	0.0016755	0.000206267	8.36812	0.0632034	0.0616941	0.00963277	0.0132604	0.00528953	0.00300592	6.24064e-05	6.97291e-06	7.45521e-06	0.00526668	0.00555821	0.00392875	0.00836055	0.000642421	0.0122161	0.000217101	1.04147e-05	2.98986e-05	0.000312006	0.000505188	1.07195e-06	2.0983e-07	5.53419e-06
C5	0.463217	0.00919729	0.0019204	0.0632034	4.06938	0.0232733	0.520997	0.00858434	0.0357326	0.0039543	0.00014524	2.02575e-05	2.35701e-05	0.4559	0.463326	0.00506674	0.00177961	0.0183231	0.000290123	0.00527446	2.46256e-05	0.000109542	0.00014417	0.000171954	6.04206e-06	8.0614e-07	6.89106e-05
C6	0.466254	0.000416329	0.000100098	0.0616941	0.0232733	4.07278	0.00695769	0.517353	0.00470475	0.0371512	1.63015e-05	2.42291e-06	2.63125e-06	0.00318149	0.00460238	0.46378	0.461224	0.000280685	0.0186329	0.000355374	2.47145e-06	1.92166e-05	0.00634888	0.00599518	6.06788e-07	1.58466e-07	5.13127e-06
C7	0.0279307	0.0631252	0.016662	0.00963277	0.520997	0.00695769	3.96573	0.00107449	0.872505	0.000874006	0.00210184	0.000368174	0.000726291	0.0174256	0.0190411	0.000752871	0.00810882	0.468548	0.000122962	0.0246047	0.000367177	0.00257912	3.13321e-05	0.000617699	0.000102399	5.80046e-05	0.00133455
C8	0.0279492	0.000258431	2.37982e-05	0.0132604	0.00858434	0.517353	0.00107449	3.97784	0.00168654	0.915648	3.41119e-06	1.43739e-06	1.31143e-06	0.0110991	0.000719548	0.0192423	0.0173317	0.000177639	0.465061	0.00267258	4.36092e-07	2.25428e-06	0.0300803	0.0300569	1.46843e-07	3.80735e-08	9.25031e-07
C9	0.0137435	0.580085	0.0444	0.00528953	0.0357326	0.00470475	0.872505	0.00168654	4.095	0.00391676	0.00457672	0.000753513	0.000610885	0.00572724	0.00853281	0.000331981	0.00750819	0.0288205	0.00014758	0.459327	0.000506805	0.00514419	0.00012914	0.00294081	0.000170602	3.52534e-05	0.000794103
C10	0.0157988	0.000684656	7.08259e-05	0.00300592	0.0039543	0.0371512	0.000874006	0.915648	0.00391676	4.08382	5.62724e-06	3.15773e-06	2.86854e-06	0.00719135	0.000297541	0.0104877	0.0056598	0.000194866	0.0276225	0.00687843	6.3725e-07	2.3878e-06	0.483315	0.47885	1.84282e-07	1.21035e-07	1.09934e-06
C11	0.000120124	0.0376304	0.526629	6.24064e-05	0.00014524	1.63015e-05	0.00210184	3.41119e-06	0.00457672	5.62724e-06	4.01204	0.517426	0.0369838	6.35641e-06	5.87619e-05	1.59002e-06	3.14054e-05	0.000136394	4.24804e-07	0.000301519	0.464159	0.461779	2.30303e-07	1.84354e-05	0.0198804	0.0062712	0.00632959
C12	1.47562e-05	0.0154399	0.0405639	6.97291e-06	2.02575e-05	2.42291e-06	0.000368174	1.43739e-06	0.000753513	3.15773e-06	0.517426	3.96516	0.916256	3.74452e-06	1.1308e-05	2.73426e-07	3.58054e-06	0.0001712	9.62118e-08	0.000200296	0.0189981	0.0182627	1.15473e-07	5.61411e-06	0.473217	0.0301122	0.0300983
C13	1.39179e-05	0.0140092	0.023409	7.45521e-06	2.35701e-05	2.63125e-06	0.000726291	1.31143e-06	0.000610885	2.86854e-06	0.0369838	0.916256	4.07633	6.18057e-06	1.21206e-05	3.95077e-07	3.97896e-06	0.000630499	1.18343e-07	0.000148856	0.0088284	0.00630005	8.95192e-08	4.38549e-06	0.0289366	0.483604	0.479992
H14	0.0233292	0.00082269	0.00010866	0.00526668	0.4559	0.00318149	0.0174256	0.0110991	0.00572724	0.00719135	6.35641e-06	3.74452e-06	6.18057e-06	0.373937	0.0139689	0.000236069	0.000107593	0.00466737	0.000688121	0.00340271	1.3244e-06	6.14596e-06	0.000201437	0.000215472	2.69187e-07	1.25782e-07	1.58473e-05
H15	0.0223164	0.00144375	0.000812538	0.00555821	0.463326	0.00460238	0.0190411	0.000719548	0.00853281	0.000297541	5.87619e-05	1.1308e-05	1.21206e-05	0.0139689	0.388726	0.000969768	0.000209723	0.00144329	2.12161e-05	0.000421382	1.60677e-05	4.67965e-05	8.97281e-06	2.24109e-05	3.10544e-06	9.91136e-07	1.26503e-05
H16	0.0232534	3.49445e-05	7.77028e-06	0.00392875	0.00506674	0.46378	0.000752871	0.0192423	0.000331981	0.0104877	1.59002e-06	2.73426e-07	3.95077e-07	0.000236069	0.000969768	0.390368	0.0144182	1.77983e-05	0.000904504	6.78421e-05	3.3291e-07	1.28518e-06	0.000755877	0.000457025	4.66205e-08	2.32398e-08	7.44236e-07
H17	0.0194485	0.000861358	0.000138932	0.00836055	0.00177961	0.461224	0.00810882	0.0173317	0.00750819	0.0056598	3.14054e-05	3.58054e-06	3.97896e-06	0.000107593	0.000209723	0.0144182	0.387151	0.000225056	0.00480448	0.000369548	6.90746e-06	2.45416e-05	0.000411729	0.003435	7.16362e-07	2.39503e-07	5.8525e-06
H18	0.00363362	0.0121782	0.00135356	0.000642421	0.0183231	0.000280685	0.468548	0.000177639	0.0288205	0.000194866	0.000136394	0.0001712	0.000630499	0.00466737	0.00144329	1.77983e-05	0.000225056	0.395193	1.91509e-05	0.00594655	1.66117e-05	9.2061e-05	8.08334e-06	6.96674e-05	2.97949e-05	3.54584e-05	0.000844271
H19	0.00246801	4.19452e-05	3.2031e-06	0.0122161	0.000290123	0.0186329	0.000122962	0.465061	0.00014758	0.0276225	4.24804e-07	9.62118e-08	1.18343e-07	0.000688121	2.12161e-05	0.000904504	0.00480448	1.91509e-05	0.381107	0.000103141	5.22128e-08	5.81603e-07	0.00352809	0.00636046	1.48042e-08	5.04902e-09	1.21464e-07
H20	0.000770131	0.027243	0.00920251	0.000217101	0.00527446	0.000355374	0.0246047	0.00267258	0.459327	0.00687843	0.000301519	0.000200296	0.000148856	0.00340271	0.000421382	6.78421e-05	0.000369548	0.00594655	0.000103141	0.369697	1.74695e-05	0.00021367	0.00020291	0.00352111	1.59298e-05	6.94532e-06	4.12733e-05
H21	2.34848e-05	0.00875364	0.0267983	1.04147e-05	2.46256e-05	2.47145e-06	0.000367177	4.36092e-07	0.000506805	6.3725e-07	0.464159	0.0189981	0.0088284	1.3244e-06	1.60677e-05	3.3291e-07	6.90746e-06	1.66117e-05	5.22128e-08	1.74695e-05	0.396384	0.0146238	3.06848e-08	3.11154e-06	0.00152046	0.000795741	0.000496127
H22	7.06261e-05	0.00393107	0.0291748	2.98986e-05	0.000109542	1.92166e-05	0.00257912	2.25428e-06	0.00514419	2.3878e-06	0.461779	0.0182627	0.00630005	6.14596e-06	4.67965e-05	1.28518e-06	2.45416e-05	9.2061e-05	5.81603e-07	0.00021367	0.0146238	0.393426	1.67535e-07	3.28191e-06	0.00504917	0.000452891	0.00417779
H23	0.00134343	3.02118e-05	3.57108e-06	0.000312006	0.00014417	0.00634888	3.13321e-05	0.0300803	0.00012914	0.483315	2.30303e-07	1.15473e-07	8.95192e-08	0.000201437	8.97281e-06	0.000755877	0.000411729	8.08334e-06	0.00352809	0.00020291	3.06848e-08	1.67535e-07	0.408408	0.016797	1.36942e-08	6.87673e-09	8.73868e-08
H24	0.000719929	0.000927605	0.000102826	0.000505188	0.000171954	0.00599518	0.000617699	0.0300569	0.00294081	0.47885	1.84354e-05	5.61411e-06	4.38549e-06	0.000215472	2.24109e-05	0.000457025	0.003435	6.96674e-05	0.00636046	0.00352111	3.11154e-06	3.28191e-06	0.016797	0.410645	2.02848e-07	2.11585e-07	1.22294e-06
H25	2.13891e-06	0.000505184	0.00616139	1.07195e-06	6.04206e-06	6.06788e-07	0.000102399	1.46843e-07	0.000170602	1.84282e-07	0.0198804	0.473217	0.0289366	2.69187e-07	3.10544e-06	4.66205e-08	7.16362e-07	2.97949e-05	1.48042e-08	1.59298e-05	0.00152046	0.00504917	1.36942e-08	2.02848e-07	0.410667	0.00360999	0.00672733
H26	3.30431e-07	0.000375954	0.00154928	2.0983e-07	8.0614e-07	1.58466e-07	5.80046e-05	3.80735e-08	3.52534e-05	1.21035e-07	0.0062712	0.0301122	0.483604	1.25782e-07	9.91136e-07	2.32398e-08	2.39503e-07	3.54584e-05	5.04902e-09	6.94532e-06	0.000795741	0.000452891	6.87673e-09	2.11585e-07	0.00360999	0.409628	0.0167813
H27	1.08108e-05	0.00187005	0.00137345	5.53419e-06	6.89106e-05	5.13127e-06	0.00133455	9.25031e-07	0.000794103	1.09934e-06	0.00632959	0.0300983	0.479992	1.58473e-05	1.26503e-05	7.44236e-07	5.8525e-06	0.000844271	1.21464e-07	4.12733e-05	0.000496127	0.00417779	8.73868e-08	1.22294e-06	0.00672733	0.0167813	0.413161
LDM — ajoene_e_40_LIDI_matrix
	S1	S2	S3	O4	C5	C6	C7	C8	C9	C10	C11	C12	C13	H14	H15	H16	H17	H18	H19	H20	H21	H22	H23	H24	H25	H26	H27
S1	12.9267	0.00396955	0.000442149	0.679181	0.462156	0.464736	0.0320197	0.0271369	0.0172961	0.0147325	0.000224651	0.00181806	0.00387071	0.019894	0.0250898	0.0242036	0.0220872	0.00156753	0.0038667	0.000770066	3.85204e-05	4.04152e-05	0.000939473	0.000924204	0.000896632	0.000211223	0.0043773		92.2579	31.7402	63.4804
S2	0.00396955	14.523	0.654273	0.000746873	0.0106225	0.000710602	0.0672707	5.06403e-05	0.582743	7.29419e-05	0.0375094	0.0104512	0.00909252	0.000554958	0.00194428	8.07997e-05	0.000196015	0.00669024	4.08992e-06	0.0251314	0.00572837	0.00845368	1.71025e-05	3.48585e-06	0.000492436	0.0023046	0.000285048
S3	0.000442149	0.654273	14.6183	0.000307749	0.00163166	6.49283e-05	0.0198262	2.23765e-05	0.0376742	2.33809e-05	0.524588	0.0367134	0.0216725	0.00059637	0.00019293	8.27302e-06	1.31778e-05	0.0252643	8.21468e-07	0.00839961	0.0295912	0.0276906	1.91796e-06	9.21896e-07	0.00397787	0.00128688	0.0014961
O4	0.679181	0.000746873	0.000307749	8.35952	0.0613482	0.0621808	0.0124334	0.0094182	0.00301763	0.00534285	0.000742175	0.00839429	0.00251639	0.00825052	0.00513029	0.00607594	0.00540585	0.00644626	0.000708756	0.000365814	0.000257082	4.50955e-05	0.000323169	0.000574609	0.015997	0.000254232	0.00200592
C5	0.462156	0.0106225	0.00163166	0.0613482	4.05286	0.023794	0.517657	0.00738426	0.0379394	0.00516415	9.79593e-05	0.000244952	0.000178619	0.462332	0.461569	0.00511931	0.004412	0.016848	0.000331692	0.00585664	2.31979e-05	1.97881e-05	0.000745819	0.000133405	0.000155362	1.26499e-05	0.000154377
C6	0.464736	0.000710602	6.49283e-05	0.0621808	0.023794	4.06804	0.00473129	0.520414	0.00218235	0.0371091	3.20254e-05	0.000200492	0.000124493	0.00142378	0.00607089	0.461297	0.463335	0.000178751	0.0197555	9.04435e-05	1.03918e-05	3.15196e-06	0.00618765	0.00632389	0.000353627	1.23761e-05	0.000219725
C7	0.0320197	0.0672707	0.0198262	0.0124334	0.517657	0.00473129	3.94805	0.000941361	0.877058	0.000470961	0.00180224	0.00744806	0.00441305	0.0173303	0.0184814	0.000417441	0.000967097	0.45229	2.64363e-05	0.0253573	0.000328973	0.000317992	8.89876e-05	9.22336e-06	0.0027336	0.000240998	0.000198416
C8	0.0271369	5.06403e-05	2.23765e-05	0.0094182	0.00738426	0.520414	0.000941361	3.98125	0.000128721	0.917234	4.74537e-06	3.56207e-05	9.55088e-06	0.00792469	0.000838757	0.0177011	0.0189588	0.000163021	0.473882	2.58515e-05	2.23257e-06	4.83896e-07	0.0301789	0.0300446	6.47042e-05	9.30333e-07	1.05564e-05
C9	0.0172961	0.582743	0.0376742	0.00301763	0.0379394	0.00218235	0.877058	0.000128721	4.10374	0.000256483	0.00256564	0.00653326	0.00514267	0.00605331	0.0077438	0.000246984	0.000574589	0.0264701	1.42298e-05	0.467943	0.000299709	0.000515048	4.59186e-05	1.11181e-05	0.000652394	0.000197283	0.000183941
C10	0.0147325	7.29419e-05	2.33809e-05	0.00534285	0.00516415	0.0371091	0.000470961	0.917234	0.000256483	4.07865	4.46872e-06	2.85803e-05	8.6538e-06	0.0067301	0.00131114	0.00601308	0.00971811	0.000125542	0.0296669	2.02749e-05	2.3908e-06	4.14111e-07	0.480407	0.48311	4.76e-05	1.85768e-06	1.20747e-05
C11	0.000224651	0.0375094	0.524588	0.000742175	9.79593e-05	3.20254e-05	0.00180224	4.74537e-06	0.00256564	4.46872e-06	4.01064	0.517742	0.038046	1.75415e-05	4.30728e-05	3.40254e-06	5.65986e-06	0.000893723	2.85545e-07	0.000320098	0.464082	0.463366	6.29607e-07	4.58316e-07	0.0182701	0.0065351	0.00626141
C12	0.00181806	0.0104512	0.0367134	0.00839429	0.000244952	0.000200492	0.00744806	3.56207e-05	0.00653326	2.85803e-05	0.517742	3.97551	0.912209	4.28419e-05	3.33531e-05	2.31682e-05	8.85647e-06	0.00361114	1.9724e-06	0.000190998	0.0183767	0.0189488	2.00295e-06	2.88e-06	0.459102	0.0303866	0.0296961
C13	0.00387071	0.00909252	0.0216725	0.00251639	0.000178619	0.000124493	0.00441305	9.55088e-06	0.00514267	8.6538e-06	0.038046	0.912209	4.07965	1.80469e-05	6.42108e-05	4.49129e-05	5.5207e-06	0.000560738	2.75107e-06	0.000114164	0.00660679	0.00938358	2.00508e-06	6.73163e-07	0.026492	0.481448	0.480852
H14	0.019894	0.000554958	0.00059637	0.00825052	0.462332	0.00142378	0.0173303	0.00792469	0.00605331	0.0067301	1.75415e-05	4.28419e-05	1.80469e-05	0.390865	0.0146346	0.000196697	0.000131861	0.00423104	0.000249483	0.00354486	6.27483e-06	4.75456e-06	0.000340034	0.000156021	4.35696e-05	2.55218e-06	7.7975e-06
H15	0.0250898	0.00194428	0.00019293	0.00513029	0.461569	0.00607089	0.0184814	0.000838757	0.0077438	0.00131114	4.30728e-05	3.33531e-05	6.42108e-05	0.0146346	0.395764	0.00493775	0.000384443	0.00158671	0.000140452	0.000423553	4.8596e-06	8.23032e-06	0.00086715	7.57736e-05	6.21276e-06	4.37293e-06	6.36902e-05
H16	0.0242036	8.07997e-05	8.27302e-06	0.00607594	0.00511931	0.461297	0.000417441	0.0177011	0.000246984	0.00601308	3.40254e-06	2.31682e-05	4.49129e-05	0.000196697	0.00493775	0.391736	0.0145171	1.47292e-05	0.00509302	1.50763e-05	6.5079e-07	7.56244e-07	0.00377188	0.000427595	1.04487e-05	1.89001e-06	6.71402e-05
H17	0.0220872	0.000196015	1.31778e-05	0.00540585	0.004412	0.463335	0.000967097	0.0189588	0.000574589	0.00971811	5.65986e-06	8.85647e-06	5.5207e-06	0.000131861	0.000384443	0.0145171	0.388517	1.64919e-05	0.00146795	2.06346e-05	1.1602e-06	1.05709e-06	0.000503727	0.000795149	1.07453e-05	6.65874e-07	4.26648e-06
H18	0.00156753	0.00669024	0.0252643	0.00644626	0.016848	0.000178751	0.45229	0.000163021	0.0264701	0.000125542	0.000893723	0.00361114	0.000560738	0.00423104	0.00158671	1.47292e-05	1.64919e-05	0.363413	3.84135e-06	0.00579798	0.000231115	6.34609e-05	4.25673e-06	3.44488e-06	0.00314632	8.4644e-05	4.05537e-05
H19	0.0038667	4.08992e-06	8.21468e-07	0.000708756	0.000331692	0.0197555	2.64363e-05	0.473882	1.42298e-05	0.0296669	2.85545e-07	1.9724e-06	2.75107e-06	0.000249483	0.000140452	0.00509302	0.00146795	3.84135e-06	0.410109	1.54553e-06	8.17573e-08	8.37034e-08	0.00678695	0.00370157	1.3214e-06	1.19789e-07	3.56032e-06
H20	0.000770066	0.0251314	0.00839961	0.000365814	0.00585664	9.04435e-05	0.0253573	2.58515e-05	0.467943	2.02749e-05	0.000320098	0.000190998	0.000114164	0.00354486	0.000423553	1.50763e-05	2.06346e-05	0.00579798	1.54553e-06	0.3903	1.47761e-05	0.000171985	2.08347e-06	6.15007e-07	6.88906e-05	4.08977e-06	7.03443e-06
H21	3.85204e-05	0.00572837	0.0295912	0.000257082	2.31979e-05	1.03918e-05	0.000328973	2.23257e-06	0.000299709	2.3908e-06	0.464082	0.0183767	0.00660679	6.27483e-06	4.8596e-06	6.5079e-07	1.1602e-06	0.000231115	8.17573e-08	1.47761e-05	0.396468	0.0146816	1.24919e-07	2.1281e-07	0.00472525	0.00449622	0.000463344
H22	4.04152e-05	0.00845368	0.0276906	4.50955e-05	1.97881e-05	3.15196e-06	0.000317992	4.83896e-07	0.000515048	4.14111e-07	0.463366	0.0189488	0.00938358	4.75456e-06	8.23032e-06	7.56244e-07	1.05709e-06	6.34609e-05	8.37034e-08	0.000171985	0.0146816	0.397009	1.1687e-07	4.86823e-08	0.00131531	0.000507422	0.000798585
H23	0.000939473	1.71025e-05	1.91796e-06	0.000323169	0.000745819	0.00618765	8.89876e-05	0.0301789	4.59186e-05	0.480407	6.29607e-07	2.00295e-06	2.00508e-06	0.000340034	0.00086715	0.00377188	0.000503727	4.25673e-06	0.00678695	2.08347e-06	1.24919e-07	1.1687e-07	0.410593	0.0166707	2.22219e-06	1.50346e-07	1.78464e-06
H24	0.000924204	3.48585e-06	9.21896e-07	0.000574609	0.000133405	0.00632389	9.22336e-06	0.0300446	1.11181e-05	0.48311	4.58316e-07	2.88e-06	6.73163e-07	0.000156021	7.57736e-05	0.000427595	0.000795149	3.44488e-06	0.00370157	6.15007e-07	2.1281e-07	4.86823e-08	0.0166707	0.407017	5.19701e-06	1.40565e-07	9.04732e-07
H25	0.000896632	0.000492436	0.00397787	0.015997	0.000155362	0.000353627	0.0027336	6.47042e-05	0.000652394	4.76e-05	0.0182701	0.459102	0.026492	4.35696e-05	6.21276e-06	1.04487e-05	1.07453e-05	0.00314632	1.3214e-06	6.88906e-05	0.00472525	0.00131531	2.22219e-06	5.19701e-06	0.368806	0.0063471	0.00335858
H26	0.000211223	0.0023046	0.00128688	0.000254232	1.26499e-05	1.23761e-05	0.000240998	9.30333e-07	0.000197283	1.85768e-06	0.0065351	0.0303866	0.481448	2.55218e-06	4.37293e-06	1.89001e-06	6.65874e-07	8.4644e-05	1.19789e-07	4.08977e-06	0.00449622	0.000507422	1.50346e-07	1.40565e-07	0.0063471	0.417543	0.0167579
H27	0.0043773	0.000285048	0.0014961	0.00200592	0.000154377	0.000219725	0.000198416	1.05564e-05	0.000183941	1.20747e-05	0.00626141	0.0296961	0.480852	7.7975e-06	6.36902e-05	6.71402e-05	4.26648e-06	4.05537e-05	3.56032e-06	7.03443e-06	0.000463344	0.000798585	1.78464e-06	9.04732e-07	0.00335858	0.0167579	0.403848
LDM — ajoene_e_41_LIDI_matrix
	S1	S2	S3	O4	C5	C6	C7	C8	C9	C10	C11	C12	C13	H14	H15	H16	H17	H18	H19	H20	H21	H22	H23	H24	H25	H26	H27
S1	12.9405	0.00308869	0.00225867	0.67918	0.455166	0.468012	0.0297086	0.0315564	0.0210332	0.0174051	0.00113494	0.000532471	0.000278421	0.0207044	0.022431	0.020609	0.0233072	0.00145548	0.00171498	0.000970408	7.52374e-05	0.00195421	0.000780655	0.000979438	0.000205957	1.20017e-05	1.28079e-05		92.2764	31.7233	63.4465
S2	0.00308869	14.5587	0.636423	0.00166576	0.00920471	0.000318556	0.0607942	5.5565e-05	0.577655	0.000104552	0.0350346	0.0117939	0.00176456	0.00145242	0.00109799	3.68645e-05	0.000470613	0.0136789	2.27925e-05	0.0270596	0.00872724	0.00280616	4.59596e-06	5.17487e-06	0.0174905	0.000568402	0.000236915
S3	0.00225867	0.636423	14.649	0.0025095	0.00182396	0.000312031	0.0183996	0.00011267	0.0430548	7.90752e-05	0.533051	0.0392868	0.0176512	9.42301e-05	0.000262395	2.20798e-05	0.000429981	0.00147638	0.000254085	0.0082148	0.0265842	0.0265779	5.91281e-06	4.54665e-06	0.00425315	0.000849272	0.00159426
O4	0.67918	0.00166576	0.0025095	8.32101	0.0613925	0.060467	0.0141567	0.0105468	0.0182409	0.00311672	0.0122704	0.000934637	0.000618597	0.00831481	0.00419942	0.00844063	0.00438388	0.000540983	0.00631617	0.00676705	0.00048773	0.0280471	0.000393838	0.000188065	6.02188e-05	3.26339e-05	4.68549e-05
C5	0.455166	0.00920471	0.00182396	0.0613925	4.06409	0.0232769	0.522891	0.00496607	0.0349973	0.00202767	0.000225234	5.5292e-05	1.72813e-05	0.469499	0.464097	0.0030056	0.00291554	0.0185674	0.000209281	0.00479793	1.98367e-05	0.000243697	0.000110516	0.000240081	7.2084e-05	1.48727e-06	1.48191e-06
C6	0.468012	0.000318556	0.000312031	0.060467	0.0232769	4.06953	0.00965923	0.516293	0.00247185	0.038369	0.000825477	0.00329312	0.0012114	0.00262799	0.00449232	0.466354	0.449658	0.00283382	0.0187337	0.000194732	4.04807e-05	0.00150205	0.00636731	0.00641735	0.00107019	5.87093e-05	3.79015e-05
C7	0.0297086	0.0607942	0.0183996	0.0141567	0.522891	0.00965923	3.95385	0.00096712	0.865289	0.000402849	0.00254094	0.000689927	0.000147306	0.0183604	0.0184849	0.000565941	0.0116187	0.467485	3.65172e-05	0.0236369	0.00025728	0.00295902	2.33803e-05	5.64369e-05	0.00101738	2.16851e-05	1.08938e-05
C8	0.0315564	5.5565e-05	0.00011267	0.0105468	0.00496607	0.516293	0.00096712	3.97561	0.0002839	0.921916	0.000414964	0.00242113	0.00312665	0.00029345	0.000979514	0.0178865	0.0176936	0.000344502	0.466753	2.28054e-05	2.88981e-05	0.00057339	0.030693	0.0300874	0.000124817	0.000124813	0.000118759
C9	0.0210332	0.577655	0.0430548	0.0182409	0.0349973	0.00247185	0.865289	0.0002839	4.07779	0.000633788	0.00734755	0.00112162	0.000255495	0.00519894	0.00647029	0.000185681	0.00340698	0.0286792	1.83865e-05	0.459673	0.000718212	0.00693064	2.53988e-05	2.95272e-05	0.0011227	4.68799e-05	2.71191e-05
C10	0.0174051	0.000104552	7.90752e-05	0.00311672	0.00202767	0.038369	0.000402849	0.921916	0.000633788	4.07995	8.4666e-05	0.000384826	0.000702357	6.79839e-05	0.000575055	0.00645202	0.00867702	0.000145015	0.0277771	1.99606e-05	8.52444e-06	0.000104618	0.481954	0.483147	8.22957e-05	1.74792e-05	3.08293e-05
C11	0.00113494	0.0350346	0.533051	0.0122704	0.000225234	0.000825477	0.00254094	0.000414964	0.00734755	8.4666e-05	4.04258	0.516424	0.0370874	3.74507e-05	3.82722e-05	6.69448e-05	0.00187822	0.000183465	0.0009296	0.000428538	0.463928	0.435625	2.146e-05	6.87531e-06	0.018714	0.00622165	0.00633602
C12	0.000532471	0.0117939	0.0392868	0.000934637	5.5292e-05	0.00329312	0.000689927	0.00242113	0.00112162	0.000384826	0.516424	3.9707	0.918795	5.60985e-06	9.05042e-06	0.000172796	0.00764359	0.000354723	0.00227586	0.000147136	0.0182898	0.0174577	4.67551e-05	2.30074e-05	0.465094	0.0305248	0.0304868
C13	0.000278421	0.00176456	0.0176512	0.000618597	1.72813e-05	0.0012114	0.000147306	0.00312665	0.000255495	0.000702357	0.0370874	0.918795	4.08381	2.77488e-06	3.04003e-06	6.76377e-05	0.00290082	7.19135e-05	0.00270822	4.74806e-05	0.00647509	0.00962532	5.56e-05	3.49401e-05	0.0289377	0.481928	0.484174
H14	0.0207044	0.00145242	9.42301e-05	0.00831481	0.469499	0.00262799	0.0183604	0.00029345	0.00519894	6.79839e-05	3.74507e-05	5.60985e-06	2.77488e-06	0.401342	0.0149891	0.00214705	0.000129224	0.00250108	9.11e-05	0.000331168	2.81448e-06	4.405e-05	1.10707e-05	6.93759e-06	5.47744e-06	3.33326e-07	1.92568e-07
H15	0.022431	0.00109799	0.000262395	0.00419942	0.464097	0.00449232	0.0184849	0.000979514	0.00647029	0.000575055	3.82722e-05	9.05042e-06	3.04003e-06	0.0149891	0.386107	0.000281367	0.000195225	0.00368091	1.99493e-05	0.00215116	3.99896e-06	2.44795e-05	2.72151e-05	6.2418e-05	2.21648e-05	2.28096e-07	2.54203e-07
H16	0.020609	3.68645e-05	2.20798e-05	0.00844063	0.0030056	0.466354	0.000565941	0.0178865	0.000185681	0.00645202	6.69448e-05	0.000172796	6.76377e-05	0.00214705	0.000281367	0.404609	0.014012	0.000317008	0.00494537	2.72867e-05	7.37692e-06	0.000130065	0.00403176	0.000470989	4.56497e-05	7.50543e-06	1.45045e-06
H17	0.0233072	0.000470613	0.000429981	0.00438388	0.00291554	0.449658	0.0116187	0.0176936	0.00340698	0.00867702	0.00187822	0.00764359	0.00290082	0.000129224	0.000195225	0.014012	0.367371	0.00433383	0.00132966	0.000116825	0.000134788	0.0019558	0.000445663	0.00070814	0.00290345	0.000122246	9.64435e-05
H18	0.00145548	0.0136789	0.00147638	0.000540983	0.0185674	0.00283382	0.467485	0.000344502	0.0286792	0.000145015	0.000183465	0.000354723	7.19135e-05	0.00250108	0.00368091	0.000317008	0.00433383	0.399865	1.624e-05	0.00595482	2.38535e-05	9.32331e-05	7.14889e-06	1.74761e-05	0.000742283	1.97329e-05	5.42506e-06
H19	0.00171498	2.27925e-05	0.000254085	0.00631617	0.000209281	0.0187337	3.65172e-05	0.466753	1.83865e-05	0.0277771	0.0009296	0.00227586	0.00270822	9.11e-05	1.99493e-05	0.00494537	0.00132966	1.624e-05	0.387475	4.73684e-06	9.08644e-05	0.000805234	0.00650214	0.00353387	5.22563e-05	0.000259443	6.5267e-05
H20	0.000970408	0.0270596	0.0082148	0.00676705	0.00479793	0.000194732	0.0236369	2.28054e-05	0.459673	1.99606e-05	0.000428538	0.000147136	4.74806e-05	0.000331168	0.00215116	2.72867e-05	0.000116825	0.00595482	4.73684e-06	0.363239	2.08051e-05	0.000508899	1.23102e-06	1.31876e-06	0.000162341	6.88483e-06	7.59565e-06
H21	7.52374e-05	0.00872724	0.0265842	0.00048773	1.98367e-05	4.04807e-05	0.00025728	2.88981e-05	0.000718212	8.52444e-06	0.463928	0.0182898	0.00647509	2.81448e-06	3.99896e-06	7.37692e-06	0.000134788	2.38535e-05	9.08644e-05	2.08051e-05	0.397656	0.01298	2.54641e-06	8.31478e-07	0.00496047	0.00399358	0.000486054
H22	0.00195421	0.00280616	0.0265779	0.0280471	0.000243697	0.00150205	0.00295902	0.00057339	0.00693064	0.000104618	0.435625	0.0174577	0.00962532	4.405e-05	2.44795e-05	0.000130065	0.0019558	9.32331e-05	0.000805234	0.000508899	0.01298	0.327652	2.88087e-05	7.69466e-06	0.00064177	0.000405828	0.000647405
H23	0.000780655	4.59596e-06	5.91281e-06	0.000393838	0.000110516	0.00636731	2.33803e-05	0.030693	2.53988e-05	0.481954	2.146e-05	4.67551e-05	5.56e-05	1.10707e-05	2.72151e-05	0.00403176	0.000445663	7.14889e-06	0.00650214	1.23102e-06	2.54641e-06	2.88087e-05	0.416604	0.0168765	3.22307e-06	4.66669e-06	1.11163e-06
H24	0.000979438	5.17487e-06	4.54665e-06	0.000188065	0.000240081	0.00641735	5.64369e-05	0.0300874	2.95272e-05	0.483147	6.87531e-06	2.30074e-05	3.49401e-05	6.93759e-06	6.2418e-05	0.000470989	0.00070814	1.74761e-05	0.00353387	1.31876e-06	8.31478e-07	7.69466e-06	0.0168765	0.407163	5.88726e-06	2.00879e-06	1.23077e-06
H25	0.000205957	0.0174905	0.00425315	6.02188e-05	7.2084e-05	0.00107019	0.00101738	0.000124817	0.0011227	8.22957e-05	0.018714	0.465094	0.0289377	5.47744e-06	2.21648e-05	4.56497e-05	0.00290345	0.000742283	5.22563e-05	0.000162341	0.00496047	0.00064177	3.22307e-06	5.88726e-06	0.400411	0.00652389	0.00365421
H26	1.20017e-05	0.000568402	0.000849272	3.26339e-05	1.48727e-06	5.87093e-05	2.16851e-05	0.000124813	4.68799e-05	1.74792e-05	0.00622165	0.0305248	0.481928	3.33326e-07	2.28096e-07	7.50543e-06	0.000122246	1.97329e-05	0.000259443	6.88483e-06	0.00399358	0.000405828	4.66669e-06	2.00879e-06	0.00652389	0.416769	0.0171005
H27	1.28079e-05	0.000236915	0.00159426	4.68549e-05	1.48191e-06	3.79015e-05	1.08938e-05	0.000118759	2.71191e-05	3.08293e-05	0.00633602	0.0304868	0.484174	1.92568e-07	2.54203e-07	1.45045e-06	9.64435e-05	5.42506e-06	6.5267e-05	7.59565e-06	0.000486054	0.000647405	1.11163e-06	1.23077e-06	0.00365421	0.0171005	0.413092
LDM — ajoene_e_42_LIDI_matrix
	S1	S2	S3	O4	C5	C6	C7	C8	C9	C10	C11	C12	C13	H14	H15	H16	H17	H18	H19	H20	H21	H22	H23	H24	H25	H26	H27
S1	12.9296	0.00202926	0.00155371	0.68051	0.464796	0.464525	0.0312376	0.0274433	0.016668	0.0165657	0.000269732	0.00207962	0.00171367	0.0237064	0.0207202	0.0200313	0.0228056	0.0015578	0.00218063	0.000776701	5.84002e-05	7.26196e-05	0.000758469	0.00131627	0.00299681	0.00170803	9.53623e-05		92.3008	31.6978	63.3955
S2	0.00202926	14.5526	0.648529	0.000486237	0.00931662	0.000339424	0.0578574	0.000104762	0.572462	0.000133846	0.0379135	0.0120431	0.00836005	0.00164612	0.000984239	2.05107e-05	8.81499e-05	0.0116769	3.43548e-06	0.028965	0.00859055	0.00499123	6.50531e-06	4.40559e-06	0.00057138	0.000280283	0.0019653
S3	0.00155371	0.648529	14.6533	0.000430067	0.00187253	0.000264536	0.0180032	1.73106e-05	0.0444526	4.67011e-05	0.527069	0.0378875	0.0212423	0.000223558	0.000121617	1.06172e-05	8.94442e-05	0.0012971	1.48561e-06	0.00680229	0.0275006	0.0297758	1.97855e-06	1.91772e-06	0.0063884	0.00134929	0.00129289
O4	0.68051	0.000486237	0.000430067	8.34716	0.0615429	0.0607331	0.0110079	0.0138646	0.00286823	0.0030919	0.000253621	0.00157413	0.0101781	0.00459079	0.00838307	0.00845465	0.00364259	0.00591958	0.0115397	0.000354484	3.10185e-05	2.76611e-05	0.000496122	0.000289504	0.000340099	0.0184613	0.000583356
C5	0.464796	0.00931662	0.00187253	0.0615429	4.07083	0.0242764	0.517144	0.00852577	0.0371378	0.00480573	0.0001143	0.000193145	0.000271555	0.454089	0.466395	0.00363202	0.00478509	0.0175099	0.000221853	0.00573511	3.97035e-05	7.4945e-06	0.000287958	0.000154254	0.000143783	8.65009e-05	1.34121e-05
C6	0.464525	0.000339424	0.000264536	0.0607331	0.0242764	4.06824	0.00475726	0.517576	0.00199424	0.0374692	2.7451e-05	6.69945e-05	0.000154424	0.0038104	0.00287309	0.46632	0.464257	0.000200572	0.0186709	0.000102092	7.83995e-06	2.34704e-06	0.00628351	0.00635516	0.000191851	0.00035686	7.62405e-06
C7	0.0312376	0.0578574	0.0180032	0.0110079	0.517144	0.00475726	3.94948	0.000861882	0.881183	0.000484259	0.00139855	0.00630492	0.00675679	0.0178838	0.01809	0.000413083	0.00100001	0.461209	2.16811e-05	0.026319	0.00058776	9.76028e-05	3.98489e-05	1.70997e-05	0.000947463	0.000476629	0.000215225
C8	0.0274433	0.000104762	1.73106e-05	0.0138646	0.00852577	0.517576	0.000861882	3.97593	0.000339249	0.916285	3.64841e-06	2.26763e-05	3.56876e-05	0.0125642	0.000467928	0.0178208	0.0191297	2.86279e-05	0.465395	2.06646e-05	6.9819e-07	7.98913e-07	0.0305845	0.0299417	5.00814e-05	4.57547e-05	2.12655e-06
C9	0.016668	0.572462	0.0444526	0.00286823	0.0371378	0.00199424	0.881183	0.000339249	4.08369	0.000671257	0.00218351	0.00763539	0.00434326	0.00755243	0.00637924	7.15536e-05	0.000578282	0.0266934	1.5204e-05	0.467165	0.000391113	0.000366125	2.51611e-05	2.5193e-05	0.00174855	0.000166196	0.000180048
C10	0.0165657	0.000133846	4.67011e-05	0.0030919	0.00480573	0.0374692	0.000484259	0.916285	0.000671257	4.08213	6.67044e-06	1.42851e-05	1.09469e-05	0.00979658	0.000328874	0.00597709	0.0101206	2.21384e-05	0.027528	2.60452e-05	2.2666e-06	6.75769e-07	0.481797	0.482918	3.70976e-05	1.84212e-05	5.01672e-07
C11	0.000269732	0.0379135	0.527069	0.000253621	0.0001143	2.7451e-05	0.00139855	3.64841e-06	0.00218351	6.67044e-06	4.0097	0.516859	0.0371345	2.97805e-05	1.59831e-05	2.32422e-06	4.36934e-06	0.000189689	5.39957e-07	0.000334248	0.463887	0.464207	3.64613e-07	3.87808e-07	0.0200743	0.00583097	0.00661391
C12	0.00207962	0.0120431	0.0378875	0.00157413	0.000193145	6.69945e-05	0.00630492	2.26763e-05	0.00763539	1.42851e-05	0.516859	3.97058	0.912508	5.14501e-05	2.54176e-05	7.14233e-06	5.90348e-06	0.00189749	2.46509e-06	0.000212405	0.0190238	0.0183842	8.64367e-07	1.5408e-06	0.471867	0.0277252	0.0306755
C13	0.00171367	0.00836005	0.0212423	0.0101781	0.000271555	0.000154424	0.00675679	3.56876e-05	0.00434326	1.09469e-05	0.0371345	0.912508	4.08189	3.01272e-05	7.36635e-05	3.05431e-05	6.83954e-06	0.00416333	1.2036e-05	0.000156562	0.00961039	0.0065133	1.54132e-06	1.10619e-06	0.028716	0.468254	0.481126
H14	0.0237064	0.00164612	0.000223558	0.00459079	0.454089	0.0038104	0.0178838	0.0125642	0.00755243	0.00979658	2.97805e-05	5.14501e-05	3.01272e-05	0.369262	0.0143213	0.000222899	0.00027551	0.00149019	0.000453771	0.000404068	1.04471e-05	1.01543e-06	0.000450492	0.000249071	5.62331e-05	1.5589e-05	2.79877e-06
H15	0.0207202	0.000984239	0.000121617	0.00838307	0.466395	0.00287309	0.01809	0.000467928	0.00637924	0.000328874	1.59831e-05	2.54176e-05	7.36635e-05	0.0143213	0.403378	0.00258911	0.000226748	0.00468387	7.33815e-05	0.00391695	5.08259e-06	2.26418e-06	0.000125773	1.47632e-05	6.6879e-06	1.42719e-05	6.20868e-06
H16	0.0200313	2.05107e-05	1.06172e-05	0.00845465	0.00363202	0.46632	0.000413083	0.0178208	7.15536e-05	0.00597709	2.32422e-06	7.14233e-06	3.05431e-05	0.000222899	0.00258911	0.402553	0.0148979	9.6291e-05	0.00501002	1.04457e-05	3.55049e-07	1.50719e-07	0.00388581	0.000446492	4.73575e-06	5.17809e-05	1.81949e-06
H17	0.0228056	8.81499e-05	8.94442e-05	0.00364259	0.00478509	0.464257	0.00100001	0.0191297	0.000578282	0.0101206	4.36934e-06	5.90348e-06	6.83954e-06	0.00027551	0.000226748	0.0148979	0.390595	1.93399e-05	0.00104468	2.57103e-05	2.46892e-06	3.06653e-07	0.000474029	0.000765238	3.60429e-06	9.85565e-06	3.74453e-07
H18	0.0015578	0.0116769	0.0012971	0.00591958	0.0175099	0.000200572	0.461209	2.86279e-05	0.0266934	2.21384e-05	0.000189689	0.00189749	0.00416333	0.00149019	0.00468387	9.6291e-05	1.93399e-05	0.372985	3.31517e-06	0.00596562	5.4631e-05	1.99779e-05	5.41615e-06	1.14703e-06	7.53185e-05	0.000434563	0.000280815
H19	0.00218063	3.43548e-06	1.48561e-06	0.0115397	0.000221853	0.0186709	2.16811e-05	0.465395	1.5204e-05	0.027528	5.39957e-07	2.46509e-06	1.2036e-05	0.000453771	7.33815e-05	0.00501002	0.00104468	3.31517e-06	0.380834	9.57892e-07	5.9957e-08	6.80852e-08	0.00646968	0.0035129	1.52207e-06	1.90818e-05	1.08954e-06
H20	0.000776701	0.028965	0.00680229	0.000354484	0.00573511	0.000102092	0.026319	2.06646e-05	0.467165	2.60452e-05	0.000334248	0.000212405	0.000156562	0.000404068	0.00391695	1.04457e-05	2.57103e-05	0.00596562	9.57892e-07	0.389236	2.2212e-05	0.000145704	1.53592e-06	1.24255e-06	0.000102282	8.91721e-06	4.2106e-05
H21	5.84002e-05	0.00859055	0.0275006	3.10185e-05	3.97035e-05	7.83995e-06	0.00058776	6.9819e-07	0.000391113	2.2666e-06	0.463887	0.0190238	0.00961039	1.04471e-05	5.08259e-06	3.55049e-07	2.46892e-06	5.4631e-05	5.9957e-08	2.2212e-05	0.399966	0.0147897	9.23902e-08	9.37582e-08	0.00131853	0.000740771	0.000518922
H22	7.26196e-05	0.00499123	0.0297758	2.76611e-05	7.4945e-06	2.34704e-06	9.76028e-05	7.98913e-07	0.000366125	6.75769e-07	0.464207	0.0183842	0.0065133	1.01543e-06	2.26418e-06	1.50719e-07	3.06653e-07	1.99779e-05	6.80852e-08	0.000145704	0.0147897	0.396946	3.79015e-08	6.64689e-08	0.00520789	0.000446821	0.0045657
H23	0.000758469	6.50531e-06	1.97855e-06	0.000496122	0.000287958	0.00628351	3.98489e-05	0.0305845	2.51611e-05	0.481797	3.64613e-07	8.64367e-07	1.54132e-06	0.000450492	0.000125773	0.00388581	0.000474029	5.41615e-06	0.00646968	1.53592e-06	9.23902e-08	3.79015e-08	0.416646	0.0169171	1.78983e-06	2.2816e-06	1.1837e-07
H24	0.00131627	4.40559e-06	1.91772e-06	0.000289504	0.000154254	0.00635516	1.70997e-05	0.0299417	2.5193e-05	0.482918	3.87808e-07	1.5408e-06	1.10619e-06	0.000249071	1.47632e-05	0.000446492	0.000765238	1.14703e-06	0.0035129	1.24255e-06	9.37582e-08	6.64689e-08	0.0169171	0.406502	4.48475e-06	1.71265e-06	5.44789e-08
H25	0.00299681	0.00057138	0.0063884	0.000340099	0.000143783	0.000191851	0.000947463	5.00814e-05	0.00174855	3.70976e-05	0.0200743	0.471867	0.028716	5.62331e-05	6.6879e-06	4.73575e-06	3.60429e-06	7.53185e-05	1.52207e-06	0.000102282	0.00131853	0.00520789	1.78983e-06	4.48475e-06	0.413395	0.00337599	0.00688943
H26	0.00170803	0.000280283	0.00134929	0.0184613	8.65009e-05	0.00035686	0.000476629	4.57547e-05	0.000166196	1.84212e-05	0.00583097	0.0277252	0.468254	1.5589e-05	1.42719e-05	5.17809e-05	9.85565e-06	0.000434563	1.90818e-05	8.91721e-06	0.000740771	0.000446821	2.2816e-06	1.71265e-06	0.00337599	0.36564	0.0155133
H27	9.53623e-05	0.0019653	0.00129289	0.000583356	1.34121e-05	7.62405e-06	0.000215225	2.12655e-06	0.000180048	5.01672e-07	0.00661391	0.0306755	0.481126	2.79877e-06	6.20868e-06	1.81949e-06	3.74453e-07	0.000280815	1.08954e-06	4.2106e-05	0.000518922	0.0045657	1.1837e-07	5.44789e-08	0.00688943	0.0155133	0.417715
LDM — ajoene_e_43_LIDI_matrix
	S1	S2	S3	O4	C5	C6	C7	C8	C9	C10	C11	C12	C13	H14	H15	H16	H17	H18	H19	H20	H21	H22	H23	H24	H25	H26	H27
S1	12.9322	0.00413045	0.000345034	0.686492	0.463607	0.466788	0.0280621	0.0272855	0.0152307	0.0140098	0.000125892	6.4035e-05	0.000109698	0.0193266	0.0230496	0.0235869	0.0227854	0.0023204	0.00455413	0.000618923	3.36676e-05	8.03852e-06	0.000944349	0.000853078	4.92679e-06	2.17694e-05	1.14145e-05		92.304	31.6961	63.3921
S2	0.00413045	14.5297	0.653117	0.000892724	0.00931957	0.000511477	0.0640264	0.000178817	0.576255	0.00072695	0.0384261	0.00960136	0.00695168	0.000792678	0.00171694	0.000996759	5.08372e-05	0.0105161	6.92956e-05	0.0274796	0.00835537	0.00678994	4.98421e-05	0.0019047	0.000515686	0.000273469	0.0022938
S3	0.000345034	0.653117	14.6419	9.34622e-05	0.00184574	8.67008e-05	0.0127985	1.39439e-05	0.0414797	5.32874e-05	0.527821	0.0397987	0.0219647	0.00010149	0.000624708	0.000127663	5.85124e-06	0.00119804	3.69716e-06	0.010965	0.026962	0.0292016	2.71227e-06	0.000142395	0.00630345	0.00153008	0.00129486
O4	0.686492	0.000892724	9.34622e-05	8.37131	0.0620348	0.0629858	0.0132031	0.00949599	0.00299146	0.00528646	2.37744e-05	1.17936e-05	2.80047e-05	0.00836557	0.00409169	0.00541862	0.00529892	0.0112431	0.00079959	0.000477154	6.65673e-06	1.79651e-06	0.000605786	0.000295669	1.961e-06	7.86816e-06	8.63963e-06
C5	0.463607	0.00931957	0.00184574	0.0620348	4.06352	0.0232228	0.517382	0.00724993	0.036537	0.00409563	0.000130845	0.000125499	0.000237052	0.461614	0.463932	0.0029862	0.00476062	0.0174149	0.00033679	0.0056225	5.12092e-05	1.00296e-05	0.000109541	0.000233523	1.34457e-05	0.000118055	1.33409e-05
C6	0.466788	0.000511477	8.67008e-05	0.0629858	0.0232228	4.07284	0.00897752	0.51975	0.0040958	0.0368318	1.35404e-05	2.19569e-05	3.37573e-05	0.00177547	0.00499151	0.455911	0.462939	0.000276315	0.0198245	0.0001883	5.9383e-06	1.34485e-06	0.0063128	0.00583091	1.06065e-06	7.97368e-06	1.32961e-06
C7	0.0280621	0.0640264	0.0127985	0.0132031	0.517382	0.00897752	3.95079	0.00132121	0.873035	0.00161841	0.00170925	0.00297886	0.00491062	0.0174723	0.0191582	0.0107378	0.000769685	0.460887	0.000178856	0.0246391	0.000654215	0.000144778	7.90229e-05	0.00163418	0.000127231	0.000373923	0.000260981
C8	0.0272855	0.000178817	1.39439e-05	0.00949599	0.00724993	0.51975	0.00132121	3.98254	0.00127568	0.916499	2.56778e-06	2.23721e-06	4.64804e-06	0.00879335	0.000732222	0.0171545	0.0190613	0.000135257	0.474087	0.00123759	7.68988e-07	4.46706e-07	0.0302217	0.0293579	4.71561e-07	6.83461e-07	2.48223e-07
C9	0.0152307	0.576255	0.0414797	0.00299146	0.036537	0.0040958	0.873035	0.00127568	4.08848	0.00452577	0.00211293	0.00766435	0.00722796	0.00581623	0.0093072	0.00698294	0.000310207	0.0272288	0.000177038	0.461492	0.000429527	0.000311506	0.000232142	0.00549301	0.000686554	0.000236587	0.000263732
C10	0.0140098	0.00072695	5.32874e-05	0.00528646	0.00409563	0.0368318	0.00161841	0.916499	0.00452577	4.07996	5.24219e-06	5.58237e-06	8.6862e-06	0.00656238	0.000261964	0.00564416	0.0101183	0.00014864	0.0298192	0.00381064	9.96634e-07	1.36091e-06	0.483514	0.475972	1.01344e-06	4.7072e-07	5.98666e-07
C11	0.000125892	0.0384261	0.527821	2.37744e-05	0.000130845	1.35404e-05	0.00170925	2.56778e-06	0.00211293	5.24219e-06	4.012	0.516814	0.036668	6.39814e-06	8.45862e-05	2.6922e-05	1.91266e-06	9.53608e-05	5.72906e-07	0.00031768	0.464025	0.463257	2.13817e-07	3.35702e-05	0.0199633	0.00629398	0.00631567
C12	6.4035e-05	0.00960136	0.0397987	1.17936e-05	0.000125499	2.19569e-05	0.00297886	2.23721e-06	0.00766435	5.58237e-06	0.516814	3.96689	0.915048	8.63999e-06	8.08489e-05	2.95e-05	2.04377e-06	0.000125925	8.33966e-07	0.000688641	0.0192338	0.0183097	4.56097e-07	1.49852e-05	0.473398	0.0302972	0.0299001
C13	0.000109698	0.00695168	0.0219647	2.80047e-05	0.000237052	3.37573e-05	0.00491062	4.64804e-06	0.00722796	8.6862e-06	0.036668	0.915048	4.07142	1.29572e-05	0.000178108	4.05261e-05	3.93745e-06	0.000377277	1.07163e-06	0.000199658	0.00914139	0.00627772	6.75381e-07	1.47475e-05	0.0291452	0.483501	0.479815
H14	0.0193266	0.000792678	0.00010149	0.00836557	0.461614	0.00177547	0.0174723	0.00879335	0.00581623	0.00656238	6.39814e-06	8.63999e-06	1.29572e-05	0.387656	0.0144027	0.000104671	0.000213692	0.00467491	0.000324354	0.00358232	1.4665e-06	2.20911e-06	0.000158485	0.000229691	4.24008e-06	3.78908e-06	3.04443e-06
H15	0.0230496	0.00171694	0.000624708	0.00409169	0.463932	0.00499151	0.0191582	0.000732222	0.0093072	0.000261964	8.45862e-05	8.08489e-05	0.000178108	0.0144027	0.392477	0.000219441	0.000984307	0.000950131	2.02598e-05	0.000407727	3.87638e-05	6.71042e-06	6.51942e-06	4.13619e-05	3.48067e-06	0.000123675	1.11539e-05
H16	0.0235869	0.000996759	0.000127663	0.00541862	0.0029862	0.455911	0.0107378	0.0171545	0.00698294	0.00564416	2.6922e-05	2.95e-05	4.05261e-05	0.000104671	0.000219441	0.375675	0.0140459	0.000643516	0.00495231	0.000182012	9.2498e-06	1.99653e-06	0.000395411	0.00337983	1.22885e-06	1.53959e-06	1.68052e-06
H17	0.0227854	5.08372e-05	5.85124e-06	0.00529892	0.00476062	0.462939	0.000769685	0.0190613	0.000310207	0.0101183	1.91266e-06	2.04377e-06	3.93745e-06	0.000213692	0.000984307	0.0140459	0.3887	2.08793e-05	0.00127565	3.95543e-05	6.26599e-07	1.3894e-07	0.000787478	0.000475747	1.30039e-07	2.3775e-06	1.60762e-07
H18	0.0023204	0.0105161	0.00119804	0.0112431	0.0174149	0.000276315	0.460887	0.000135257	0.0272288	0.00014864	9.53608e-05	0.000125925	0.000377277	0.00467491	0.000950131	0.000643516	2.08793e-05	0.372601	2.25851e-05	0.0057768	2.06063e-05	1.96757e-05	4.41206e-06	7.3588e-05	1.53487e-05	1.3772e-05	9.44384e-05
H19	0.00455413	6.92956e-05	3.69716e-06	0.00079959	0.00033679	0.0198245	0.000178856	0.474087	0.000177038	0.0298192	5.72906e-07	8.33966e-07	1.07163e-06	0.000324354	2.02598e-05	0.00495231	0.00127565	2.25851e-05	0.411706	7.12751e-05	1.28633e-07	6.07588e-08	0.00371574	0.00659288	4.70734e-08	6.57555e-08	6.54488e-08
H20	0.000618923	0.0274796	0.010965	0.000477154	0.0056225	0.0001883	0.0246391	0.00123759	0.461492	0.00381064	0.00031768	0.000688641	0.000199658	0.00358232	0.000407727	0.000182012	3.95543e-05	0.0057768	7.12751e-05	0.378088	1.58614e-05	0.000181317	0.00010376	0.00294759	0.000305418	9.59118e-06	2.85347e-05
H21	3.36676e-05	0.00835537	0.026962	6.65673e-06	5.12092e-05	5.9383e-06	0.000654215	7.68988e-07	0.000429527	9.96634e-07	0.464025	0.0192338	0.00914139	1.4665e-06	3.87638e-05	9.2498e-06	6.26599e-07	2.06063e-05	1.28633e-07	1.58614e-05	0.397548	0.0145259	3.22614e-08	4.91204e-06	0.00147892	0.000788887	0.000490068
H22	8.03852e-06	0.00678994	0.0292016	1.79651e-06	1.00296e-05	1.34485e-06	0.000144778	4.46706e-07	0.000311506	1.36091e-06	0.463257	0.0183097	0.00627772	2.20911e-06	6.71042e-06	1.99653e-06	1.3894e-07	1.96757e-05	6.07588e-08	0.000181317	0.0145259	0.392234	3.92988e-08	4.60768e-06	0.00516434	0.000452113	0.00416244
H23	0.000944349	4.98421e-05	2.71227e-06	0.000605786	0.000109541	0.0063128	7.90229e-05	0.0302217	0.000232142	0.483514	2.13817e-07	4.56097e-07	6.75381e-07	0.000158485	6.51942e-06	0.000395411	0.000787478	4.41206e-06	0.00371574	0.00010376	3.22614e-08	3.92988e-08	0.408965	0.0163729	3.45589e-08	3.5172e-08	2.94455e-08
H24	0.000853078	0.0019047	0.000142395	0.000295669	0.000233523	0.00583091	0.00163418	0.0293579	0.00549301	0.475972	3.35702e-05	1.49852e-05	1.47475e-05	0.000229691	4.13619e-05	0.00337983	0.000475747	7.3588e-05	0.00659288	0.00294759	4.91204e-06	4.60768e-06	0.0163729	0.399347	8.37902e-07	4.18265e-07	1.31638e-06
H25	4.92679e-06	0.000515686	0.00630345	1.961e-06	1.34457e-05	1.06065e-06	0.000127231	4.71561e-07	0.000686554	1.01344e-06	0.0199633	0.473398	0.0291452	4.24008e-06	3.48067e-06	1.22885e-06	1.30039e-07	1.53487e-05	4.70734e-08	0.000305418	0.00147892	0.00516434	3.45589e-08	8.37902e-07	0.414524	0.00366906	0.00677533
H26	2.17694e-05	0.000273469	0.00153008	7.86816e-06	0.000118055	7.97368e-06	0.000373923	6.83461e-07	0.000236587	4.7072e-07	0.00629398	0.0302972	0.483501	3.78908e-06	0.000123675	1.53959e-06	2.3775e-06	1.3772e-05	6.57555e-08	9.59118e-06	0.000788887	0.000452113	3.5172e-08	4.18265e-07	0.00366906	0.411736	0.0167312
H27	1.14145e-05	0.0022938	0.00129486	8.63963e-06	1.33409e-05	1.32961e-06	0.000260981	2.48223e-07	0.000263732	5.98666e-07	0.00631567	0.0299001	0.479815	3.04443e-06	1.11539e-05	1.68052e-06	1.60762e-07	9.44384e-05	6.54488e-08	2.85347e-05	0.000490068	0.00416244	2.94455e-08	1.31638e-06	0.00677533	0.0167312	0.409232
LDM — ajoene_e_44_LIDI_matrix
	S1	S2	S3	O4	C5	C6	C7	C8	C9	C10	C11	C12	C13	H14	H15	H16	H17	H18	H19	H20	H21	H22	H23	H24	H25	H26	H27
S1	12.9286	0.00185707	0.0015234	0.687697	0.46354	0.465491	0.0275172	0.0277099	0.0132756	0.0162401	0.000187262	0.000128371	4.4819e-05	0.0222255	0.0233138	0.0192264	0.0231857	0.00402483	0.00221082	0.000811341	0.000455414	1.86802e-05	0.000698708	0.00133509	0.000273447	3.39747e-06	4.77163e-06		92.2963	31.7044	63.4087
S2	0.00185707	14.5605	0.63993	0.000907206	0.00922376	0.000314078	0.0576443	0.000249781	0.575714	0.000750916	0.0384183	0.00843395	0.00475546	0.00187486	0.00087001	0.000457984	2.19362e-05	0.0125321	1.90692e-05	0.0277341	0.0110211	0.00277661	0.000811886	2.10746e-05	0.000329153	0.000483027	0.000224858
S3	0.0015234	0.63993	14.6234	0.000886407	0.00181297	0.000406216	0.0203898	0.000410074	0.0467464	0.0036397	0.525542	0.0428963	0.0208697	0.000384089	8.21369e-05	0.00113368	2.93859e-05	0.00143621	0.00018073	0.00642255	0.026679	0.0294044	0.0117096	0.000275769	0.00545404	0.00111671	0.00121215
O4	0.687697	0.000907206	0.000886407	8.36712	0.0633058	0.0617818	0.00964292	0.0128128	0.00525626	0.0030642	0.000126422	0.000114354	2.65083e-05	0.00509393	0.00564624	0.00808429	0.00389803	0.000735001	0.0109438	0.000273002	0.000240269	1.22756e-05	0.000441741	0.000301533	0.000221358	2.71677e-06	5.29759e-06
C5	0.46354	0.00922376	0.00181297	0.0633058	4.0713	0.0231435	0.52057	0.00830084	0.0357158	0.00384388	0.000145471	3.07719e-05	2.87825e-05	0.462742	0.45616	0.00172509	0.00505925	0.0182643	0.000244922	0.00540789	0.000177015	1.22707e-05	0.000176214	0.000139007	2.73613e-05	1.68415e-06	1.50657e-06
C6	0.465491	0.000314078	0.000406216	0.0617818	0.0231435	4.06936	0.00750104	0.517397	0.00416871	0.0371825	0.00142117	0.00130796	0.000148697	0.00465825	0.00288419	0.455669	0.463774	0.000312018	0.0186869	0.000289548	0.00327082	0.000123884	0.00559548	0.00634966	0.00245482	1.96046e-05	5.00466e-05
C7	0.0275172	0.0576443	0.0203898	0.00964292	0.52057	0.00750104	3.96387	0.0011476	0.874672	0.000982465	0.00236967	0.000352694	0.00042529	0.0190622	0.0173829	0.00856161	0.000797741	0.468289	0.000119661	0.0251117	0.00438498	0.000211725	0.000663503	3.84188e-05	2.82333e-05	2.85946e-05	1.60431e-05
C8	0.0277099	0.000249781	0.000410074	0.0128128	0.00830084	0.517397	0.0011476	3.97918	0.00185186	0.914611	0.000117043	0.000346479	3.26043e-05	0.000732259	0.0101239	0.0171377	0.0191309	0.000167224	0.465995	0.00266009	0.000244185	1.85556e-05	0.0292109	0.030014	0.00132342	7.77678e-06	1.83446e-05
C9	0.0132756	0.575714	0.0467464	0.00525626	0.0357158	0.00416871	0.874672	0.00185186	4.08625	0.00459286	0.00443938	0.000497551	0.000288146	0.00887244	0.00575688	0.00624358	0.000271615	0.0286445	0.000129434	0.459748	0.00531498	0.000568707	0.00355618	0.000151471	9.05974e-05	3.1255e-05	2.57901e-05
C10	0.0162401	0.000750916	0.0036397	0.0030642	0.00384388	0.0371825	0.000982465	0.914611	0.00459286	4.08615	0.000180262	0.00109805	0.000113727	0.000304012	0.0067318	0.00539377	0.0102692	0.000183845	0.0276693	0.00703454	6.90879e-05	6.52075e-05	0.471691	0.483089	0.00388016	2.10796e-05	6.72673e-05
C11	0.000187262	0.0384183	0.525542	0.000126422	0.000145471	0.00142117	0.00236967	0.000117043	0.00443938	0.000180262	4.01179	0.5161	0.0374763	5.33219e-05	1.48848e-05	0.00430435	6.54455e-05	0.00031849	6.7476e-05	0.000316295	0.455393	0.465588	0.000575269	1.26045e-05	0.0193162	0.00631577	0.00632131
C12	0.000128371	0.00843395	0.0428963	0.000114354	3.07719e-05	0.00130796	0.000352694	0.000346479	0.000497551	0.00109805	0.5161	3.97982	0.92031	1.19148e-05	4.25197e-06	0.00305769	0.000131316	3.9803e-05	6.83065e-05	3.97392e-05	0.0184066	0.0184655	0.00252545	6.8377e-05	0.467939	0.0300462	0.0301746
C13	4.4819e-05	0.00475546	0.0208697	2.65083e-05	2.87825e-05	0.000148697	0.00042529	3.26043e-05	0.000288146	0.000113727	0.0374763	0.92031	4.07997	2.06645e-05	1.20563e-06	0.000488596	3.95433e-05	3.64821e-05	4.32958e-06	1.03466e-05	0.00934153	0.00631953	0.000285348	6.69213e-06	0.0287454	0.483003	0.480545
H14	0.0222255	0.00187486	0.000384089	0.00509393	0.462742	0.00465825	0.0190622	0.000732259	0.00887244	0.000304012	5.33219e-05	1.19148e-05	2.06645e-05	0.385923	0.0139515	0.000198415	0.00094559	0.0012858	1.96451e-05	0.000409933	5.39233e-05	2.90061e-06	2.52393e-05	9.13016e-06	7.46344e-06	1.33635e-06	8.28127e-07
H15	0.0233138	0.00087001	8.21369e-05	0.00564624	0.45616	0.00288419	0.0173829	0.0101239	0.00575688	0.0067318	1.48848e-05	4.25197e-06	1.20563e-06	0.0139515	0.373196	9.81602e-05	0.00021146	0.00472882	0.000566148	0.00360701	2.94194e-05	1.71798e-06	0.000199604	0.00018773	1.27318e-05	1.42314e-07	1.82155e-07
H16	0.0192264	0.000457984	0.00113368	0.00808429	0.00172509	0.455669	0.00856161	0.0171377	0.00624358	0.00539377	0.00430435	0.00305769	0.000488596	0.000198415	9.81602e-05	0.38571	0.014414	0.000291661	0.0046358	0.000234636	0.007192	0.000344287	0.00300081	0.00037898	0.00337756	3.21977e-05	9.8314e-05
H17	0.0231857	2.19362e-05	2.93859e-05	0.00389803	0.00505925	0.463774	0.000797741	0.0191309	0.000271615	0.0102692	6.54455e-05	0.000131316	3.95433e-05	0.00094559	0.00021146	0.014414	0.390408	1.93485e-05	0.00098811	6.83368e-05	0.000141795	8.31974e-06	0.000447661	0.000759976	0.000205441	2.01435e-06	4.82154e-06
H18	0.00402483	0.0125321	0.00143621	0.000735001	0.0182643	0.000312018	0.468289	0.000167224	0.0286445	0.000183845	0.00031849	3.9803e-05	3.64821e-05	0.0012858	0.00472882	0.000291661	1.93485e-05	0.39418	2.01238e-05	0.00597921	0.000676621	2.4675e-05	6.96629e-05	7.8064e-06	3.04217e-06	2.84957e-06	1.46662e-06
[truncated: 6,999 more rows]

## Sheet: weighted_LDM
Weighted LDM — ajoene_e_1_LIDI_matrix (× 0.307326)
[truncated: 8,235 more rows]

## Sheet: FD
Frobenius_Distance_Full_MATRIX
[truncated: 285 more rows]
[truncated: 235 more columns]
