# Supplementary material for: Comparative Analysis of Molecular Conformers Using Localization–Delocalization Matrices and Frobenius Distance
Source: Research Square preprint supplement (doi:10.21203/rs.3.rs-7999250/v1), 2025-11-18
Supplement: Supplementary file 6 [file d79ca152a0cac74b62ce1fc3.xlsx]

## Sheet: Boltzmann_distribution
Conformer ID	E (HF)	Delta E(HF)	HF (Kcal/mol)	Boltzman distribution	Boltzman's weight	% (percentage)	FD_R	FD_W	Conformer_type	NLoc	NDeloc
1	-1621.09	0	0	1	0.183991	0.183991	0	0.07	4RCP	92.2579	31.7419
2	-1621.09	5e-05	0.0313751	0.94839	0.174495	0.174495	0.06	0.06	5RCP	92.2751	31.7241
3	-1621.09	0.000505	0.316889	0.585555	0.107737	0.107737	0.16	0.1	6RCP	92.2342	31.7652
4	-1621.09	0.001008	0.632523	0.343602	0.0632198	0.0632198	0.09	0.07	5RCP	92.2693	31.7302
5	-1621.09	0.001131	0.709706	0.301609	0.0554933	0.0554933	0.13	0.08	4RCP	92.242	31.7591
6	-1621.09	0.00131	0.822029	0.249492	0.0459043	0.0459043	0.08	0.09	5RCP	92.274	31.7245
7	-1621.09	0.00142	0.891054	0.222038	0.0408531	0.0408531	0.06	0.08	5RCP	92.2575	31.7425
8	-1621.09	0.001436	0.901094	0.218305	0.0401662	0.0401662	0.16	0.12	4RCP	92.2651	31.7341
9	-1621.09	0.001962	1.23116	0.125016	0.0230019	0.0230019	0.14	0.1	7RCP	92.2252	31.7736
10	-1621.09	0.002059	1.29203	0.112803	0.0207548	0.0207548	0.15	0.09	3RCP	92.272	31.7292
11	-1621.09	0.002135	1.33972	0.104074	0.0191486	0.0191486	0.15	0.1	4RCP	92.2414	31.761
12	-1621.09	0.002249	1.41125	0.0922297	0.0169695	0.0169695	0.14	0.09	3RCP	92.252	31.749
13	-1621.09	0.00225	1.41188	0.092132	0.0169515	0.0169515	0.13	0.08	3RCP	92.252	31.7476
14	-1621.09	0.002448	1.53613	0.0746928	0.0137428	0.0137428	0.16	0.13	5RCP	92.288	31.7104
15	-1621.09	0.002631	1.65096	0.0615249	0.01132	0.01132	0.13	0.08	2RCP	92.263	31.7369
16	-1621.09	0.002674	1.67794	0.0587841	0.0108157	0.0108157	0.14	0.09	2RCP	92.2806	31.7206
17	-1621.09	0.002743	1.72124	0.0546388	0.0100531	0.0100531	0.14	0.1	1RCP	92.2625	31.7372
18	-1621.09	0.002839	1.78148	0.0493533	0.00908057	0.00908057	0.14	0.1	5RCP	92.2309	31.7679
19	-1621.09	0.002893	1.81537	0.0466082	0.00857549	0.00857549	0.12	0.08	2RCP	92.2758	31.7254
20	-1621.09	0.00298	1.86996	0.042503	0.00782017	0.00782017	0.15	0.09	4RCP	92.2634	31.7366
21	-1621.09	0.003194	2.00424	0.0338784	0.00623333	0.00623333	0.18	0.14	2RCP	92.29	31.7109
22	-1621.09	0.003297	2.06888	0.030375	0.00558873	0.00558873	0.14	0.08	5RCP	92.2552	31.7416
23	-1621.09	0.003308	2.07578	0.030023	0.00552396	0.00552396	0.14	0.09	6RCP	92.2577	31.7428
24	-1621.09	0.003343	2.09774	0.0289297	0.00532281	0.00532281	0.14	0.1	2RCP	92.2462	31.7531
25	-1621.09	0.003355	2.10527	0.0285641	0.00525555	0.00525555	0.15	0.09	2RCP	92.2742	31.7262
26	-1621.09	0.003469	2.17681	0.0253135	0.00465745	0.00465745	0.12	0.08	2RCP	92.2553	31.7448
27	-1621.09	0.003532	2.21634	0.0236785	0.00435664	0.00435664	0.15	0.09	2RCP	92.2655	31.7343
28	-1621.09	0.003752	2.35439	0.0187541	0.0034506	0.0034506	0.14	0.09	4RCP	92.2563	31.7432
29	-1621.09	0.003823	2.39894	0.0173948	0.00320048	0.00320048	0.11	0.07	2RCP	92.291	31.7107
30	-1621.09	0.003895	2.44412	0.0161168	0.00296536	0.00296536	0.13	0.09	2RCP	92.2634	31.737
31	-1621.09	0.003998	2.50876	0.0144502	0.0026587	0.0026587	0.18	0.14	3RCP	92.2085	31.7928
32	-1621.09	0.004	2.51001	0.0144196	0.00265307	0.00265307	0.13	0.12	1RCP	92.2794	31.7211
33	-1621.09	0.004015	2.51942	0.0141922	0.00261123	0.00261123	0.15	0.1	4RCP	92.3093	31.6911
34	-1621.09	0.004155	2.60727	0.0122352	0.00225117	0.00225117	0.14	0.09	2RCP	92.2789	31.7231
35	-1621.09	0.004156	2.6079	0.0122223	0.00224879	0.00224879	0.14	0.09	2RCP	92.2872	31.7111
36	-1621.09	0.004173	2.61857	0.012004	0.00220863	0.00220863	0.15	0.09	4RCP	92.2814	31.7183
37	-1621.09	0.004188	2.62798	0.0118147	0.0021738	0.0021738	0.14	0.09	1RCP	92.2879	31.7128
38	-1621.09	0.004235	2.65748	0.0112406	0.00206818	0.00206818	0.15	0.09	3RCP	92.2688	31.7303
39	-1621.09	0.004242	2.66187	0.0111576	0.00205289	0.00205289	0.12	0.09	2RCP	92.2643	31.734
40	-1621.09	0.004291	2.69262	0.0105929	0.00194901	0.00194901	0.14	0.09	4RCP	92.2689	31.7342
41	-1621.09	0.004293	2.69387	0.0105705	0.00194488	0.00194488	0.15	0.09	5RCP	92.2782	31.7252
42	-1621.09	0.004351	2.73027	0.00994032	0.00182893	0.00182893	0.15	0.1	2RCP	92.2553	31.7449
43	-1621.09	0.004363	2.7378	0.0098147	0.00180582	0.00180582	0.14	0.09	1RCP	92.2888	31.7122
44	-1621.09	0.004376	2.74595	0.00968041	0.00178111	0.00178111	0.13	0.08	1RCP	92.2933	31.7079
45	-1621.09	0.004547	2.85326	0.00807586	0.00148589	0.00148589	0.14	0.09	2RCP	92.2823	31.7173
46	-1621.09	0.00457	2.86769	0.00788139	0.00145011	0.00145011	0.12	0.08	2RCP	92.279	31.7211
47	-1621.09	0.004577	2.87208	0.00782314	0.00143939	0.00143939	0.15	0.1	3RCP	92.2842	31.7167
48	-1621.09	0.004631	2.90597	0.007388	0.00135933	0.00135933	0.15	0.13	2RCP	92.224	31.7727
49	-1621.09	0.004639	2.91099	0.00732563	0.00134785	0.00134785	0.15	0.13	4RCP	92.2617	31.7366
50	-1621.09	0.004666	2.92793	0.00711898	0.00130983	0.00130983	0.14	0.09	3RCP	92.2804	31.7201
51	-1621.09	0.00469	2.94299	0.00694019	0.00127693	0.00127693	0.12	0.09	2RCP	92.2768	31.7226
52	-1621.09	0.004708	2.95428	0.00680905	0.00125281	0.00125281	0.14	0.09	4RCP	92.2652	31.7366
53	-1621.09	0.004729	2.96746	0.00665919	0.00122523	0.00122523	0.14	0.11	4RCP	92.2785	31.7213
54	-1621.09	0.004756	2.9844	0.00647134	0.00119067	0.00119067	0.14	0.09	1RCP	92.2538	31.7444
55	-1621.09	0.004765	2.99005	0.00640991	0.00117937	0.00117937	0.13	0.08	2RCP	92.2772	31.7228
56	-1621.09	0.004873	3.05782	0.00571668	0.00105182	0.00105182	0.15	0.12	2RCP	92.3211	31.6781
57	-1621.09	0.004932	3.09484	0.00537017	0.000988064	0.000988064	0.13	0.09	3RCP	92.2673	31.734
58	-1621.09	0.004964	3.11492	0.0051911	0.000955117	0.000955117	0.13	0.09	2RCP	92.2787	31.7218
59	-1621.09	0.004983	3.12685	0.00508762	0.000936077	0.000936077	0.14	0.08	1RCP	92.2921	31.709
60	-1621.09	0.005014	3.1463	0.00492319	0.000905824	0.000905824	0.16	0.12	1RCP	92.3202	31.6795
61	-1621.09	0.005023	3.15195	0.00487646	0.000897225	0.000897225	0.15	0.09	3RCP	92.2957	31.7028
62	-1621.09	0.005037	3.16073	0.00480464	0.000884011	0.000884011	0.13	0.08	1RCP	92.3044	31.6956
63	-1621.09	0.005055	3.17203	0.00471385	0.000867307	0.000867307	0.15	0.1	3RCP	92.2728	31.7261
64	-1621.09	0.005263	3.30255	0.0037813	0.000695726	0.000695726	0.16	0.13	3RCP	92.2842	31.7135
65	-1621.09	0.005275	3.31008	0.00373352	0.000686934	0.000686934	0.14	0.1	2RCP	92.2751	31.7251
66	-1621.09	0.005277	3.31133	0.00372561	0.00068548	0.00068548	0.16	0.12	1RCP	92.2933	31.7083
67	-1621.09	0.005294	3.322	0.00365909	0.000673241	0.000673241	0.14	0.09	4RCP	92.2885	31.7116
68	-1621.09	0.005361	3.36404	0.00340828	0.000627094	0.000627094	0.14	0.09	4RCP	92.2572	31.7442
69	-1621.09	0.005385	3.3791	0.00332269	0.000611345	0.000611345	0.12	0.08	2RCP	92.2733	31.7264
70	-1621.09	0.005418	3.39981	0.00320849	0.000590334	0.000590334	0.13	0.09	2RCP	92.2759	31.7244
71	-1621.09	0.005453	3.42177	0.00309166	0.000568838	0.000568838	0.12	0.08	2RCP	92.2846	31.716
72	-1621.09	0.005485	3.44185	0.00298857	0.00054987	0.00054987	0.12	0.08	2RCP	92.2836	31.7155
73	-1621.09	0.005502	3.45252	0.00293521	0.000540052	0.000540052	0.15	0.1	3RCP	92.2473	31.7543
74	-1621.09	0.005503	3.45315	0.0029321	0.00053948	0.00053948	0.12	0.1	2RCP	92.314	31.6873
75	-1621.09	0.005578	3.50021	0.00270806	0.00049826	0.00049826	0.14	0.12	6RCP	92.2782	31.721
76	-1621.09	0.005673	3.55982	0.00244869	0.000450538	0.000450538	0.14	0.09	2RCP	92.3064	31.6931
77	-1621.09	0.005675	3.56108	0.00244351	0.000449584	0.000449584	0.16	0.12	1RCP	92.3126	31.6858
78	-1621.09	0.005742	3.60312	0.00227602	0.000418767	0.000418767	0.12	0.09	2RCP	92.2796	31.7208
79	-1621.09	0.005756	3.61191	0.0022425	0.0004126	0.0004126	0.14	0.09	3RCP	92.2813	31.7189
80	-1621.09	0.00578	3.62697	0.00218618	0.000402238	0.000402238	0.15	0.13	2RCP	92.2278	31.7703
81	-1621.09	0.005873	3.68533	0.00198099	0.000364484	0.000364484	0.14	0.09	6RCP	92.2539	31.7471
82	-1621.09	0.005887	3.69411	0.00195181	0.000359116	0.000359116	0.14	0.09	6RCP	92.268	31.7306
83	-1621.09	0.005923	3.7167	0.00187875	0.000345673	0.000345673	0.16	0.11	3RCP	92.2753	31.7254
84	-1621.09	0.005992	3.76	0.00174627	0.000321298	0.000321298	0.13	0.1	5RCP	92.2747	31.7245
85	-1621.09	0.006	3.76502	0.00173152	0.000318585	0.000318585	0.14	0.11	1RCP	92.2867	31.7129
86	-1621.09	0.006001	3.76565	0.00172969	0.000318248	0.000318248	0.13	0.1	2RCP	92.3208	31.68
87	-1621.09	0.006011	3.77192	0.00171146	0.000314893	0.000314893	0.16	0.11	3RCP	92.2703	31.7296
88	-1621.09	0.006065	3.80581	0.00161626	0.000297378	0.000297378	0.14	0.09	1RCP	92.3145	31.6847
89	-1621.09	0.00607	3.80894	0.00160772	0.000295806	0.000295806	0.13	0.08	1RCP	92.275	31.7269
90	-1621.09	0.006103	3.82965	0.00155246	0.00028564	0.00028564	0.12	0.08	1RCP	92.2733	31.726
91	-1621.09	0.006111	3.83467	0.00153936	0.000283228	0.000283228	0.14	0.09	2RCP	92.3025	31.6986
92	-1621.09	0.006153	3.86103	0.00147234	0.000270898	0.000270898	0.15	0.1	2RCP	92.2839	31.7144
93	-1621.09	0.006154	3.86165	0.00147078	0.000270611	0.000270611	0.14	0.09	2RCP	92.2665	31.7337
94	-1621.09	0.006166	3.86918	0.00145219	0.000267191	0.000267191	0.13	0.1	3RCP	92.3088	31.6922
95	-1621.09	0.006181	3.8786	0.00142929	0.000262977	0.000262977	0.15	0.11	1RCP	92.3207	31.678
96	-1621.09	0.006207	3.89491	0.00139045	0.00025583	0.00025583	0.14	0.1	2RCP	92.2687	31.7314
97	-1621.09	0.006273	3.93633	0.00129651	0.000238547	0.000238547	0.15	0.11	3RCP	92.2713	31.7302
98	-1621.09	0.006294	3.9495	0.00126798	0.000233297	0.000233297	0.14	0.09	3RCP	92.297	31.704
99	-1621.09	0.006363	3.9928	0.00117856	0.000216845	0.000216845	0.13	0.09	1RCP	92.2829	31.7177
100	-1621.09	0.006407	4.02041	0.00112487	0.000206966	0.000206966	0.13	0.09	1RCP	92.3253	31.6749
101	-1621.09	0.006429	4.03422	0.00109895	0.000202196	0.000202196	0.15	0.09	1RCP	92.301	31.7004
102	-1621.09	0.006434	4.03735	0.00109314	0.000201128	0.000201128	0.18	0.14	2RCP	92.2787	31.7218
103	-1621.09	0.006447	4.04551	0.00107818	0.000198376	0.000198376	0.15	0.1	6RCP	92.2412	31.7598
104	-1621.09	0.006465	4.05681	0.00105781	0.000194627	0.000194627	0.15	0.12	1RCP	92.2942	31.7069
105	-1621.09	0.006481	4.06685	0.00104002	0.000191355	0.000191355	0.14	0.09	4RCP	92.2702	31.7294
106	-1621.09	0.006542	4.10512	0.000974914	0.000179376	0.000179376	0.15	0.12	1RCP	92.3099	31.6902
107	-1621.09	0.006552	4.1114	0.000964637	0.000177485	0.000177485	0.15	0.09	1RCP	92.3031	31.699
108	-1621.09	0.006565	4.11956	0.000951438	0.000175056	0.000175056	0.13	0.1	2RCP	92.276	31.723
109	-1621.09	0.006594	4.13775	0.000922641	0.000169758	0.000169758	0.13	0.09	1RCP	92.3284	31.6714
110	-1621.09	0.00671	4.21055	0.00081591	0.00015012	0.00015012	0.12	0.08	1RCP	92.2993	31.6987
111	-1621.09	0.006843	4.294	0.000708643	0.000130384	0.000130384	0.13	0.08	2RCP	92.2779	31.7218
112	-1621.09	0.006857	4.30279	0.000698207	0.000128464	0.000128464	0.14	0.1	5RCP	92.2818	31.7189
113	-1621.09	0.006879	4.31659	0.000682116	0.000125503	0.000125503	0.17	0.13	1RCP	92.2839	31.7158
114	-1621.09	0.006909	4.33542	0.00066077	0.000121576	0.000121576	0.13	0.1	2RCP	92.2916	31.7073
115	-1621.09	0.006919	4.34169	0.000653804	0.000120294	0.000120294	0.14	0.09	Acyclic	92.3258	31.6735
116	-1621.09	0.006947	4.35926	0.000634688	0.000116777	0.000116777	0.14	0.09	Acyclic	92.3147	31.6854
117	-1621.09	0.006955	4.36428	0.00062933	0.000115791	0.000115791	0.13	0.09	1RCP	92.3088	31.6917
118	-1621.09	0.006997	4.39064	0.000601932	0.00011075	0.00011075	0.14	0.1	2RCP	92.3026	31.698
119	-1621.09	0.007017	4.40319	0.000589308	0.000108427	0.000108427	0.13	0.08	Acyclic	92.3251	31.6769
120	-1621.09	0.007024	4.40758	0.000584952	0.000107626	0.000107626	0.13	0.09	1RCP	92.2993	31.6994
121	-1621.09	0.007028	4.41009	0.000582477	0.000107171	0.000107171	0.16	0.12	3RCP	92.2555	31.7446
122	-1621.09	0.00703	4.41135	0.000581244	0.000106944	0.000106944	0.15	0.11	3RCP	92.2712	31.7282
123	-1621.09	0.00708	4.44272	0.000551246	0.000101424	0.000101424	0.14	0.1	2RCP	92.2658	31.7344
124	-1621.09	0.007093	4.45088	0.000543703	0.000100037	0.000100037	0.16	0.11	4RCP	92.2744	31.7261
125	-1621.09	0.007102	4.45653	0.000538542	9.9087e-05	9.9087e-05	0.14	0.1	4RCP	92.2517	31.7469
126	-1621.09	0.007136	4.47786	0.000519482	9.55802e-05	9.55802e-05	0.15	0.11	2RCP	92.2534	31.7462
127	-1621.09	0.007166	4.49669	0.000503226	9.25891e-05	9.25891e-05	0.13	0.08	2RCP	92.2983	31.7024
128	-1621.09	0.007182	4.50673	0.000494765	9.10323e-05	9.10323e-05	0.13	0.08	Acyclic	92.3202	31.6809
129	-1621.09	0.007215	4.52743	0.00047776	8.79037e-05	8.79037e-05	0.12	0.08	Acyclic	92.3305	31.6692
130	-1621.09	0.007229	4.53622	0.000470724	8.66091e-05	8.66091e-05	0.15	0.09	1RCP	92.2904	31.7065
131	-1621.09	0.007256	4.55316	0.000457446	8.41659e-05	8.41659e-05	0.15	0.09	4RCP	92.2705	31.7311
132	-1621.09	0.007362	4.61968	0.000408838	7.52226e-05	7.52226e-05	0.12	0.08	Acyclic	92.33	31.6685
133	-1621.09	0.007387	4.63536	0.000398149	7.32558e-05	7.32558e-05	0.15	0.09	4RCP	92.2689	31.7315
134	-1621.09	0.007454	4.67741	0.000370858	6.82346e-05	6.82346e-05	0.14	0.09	5RCP	92.267	31.7334
135	-1621.09	0.007544	4.73388	0.00033712	6.2027e-05	6.2027e-05	0.13	0.09	1RCP	92.298	31.7028
136	-1621.09	0.007565	4.74706	0.0003297	6.06618e-05	6.06618e-05	0.13	0.09	1RCP	92.2903	31.7096
137	-1621.09	0.007574	4.75271	0.00032657	6.0086e-05	6.0086e-05	0.15	0.09	4RCP	92.2598	31.7408
138	-1621.09	0.007603	4.77091	0.000316686	5.82674e-05	5.82674e-05	0.15	0.12	3RCP	92.2662	31.7332
139	-1621.09	0.007621	4.7822	0.000310702	5.71664e-05	5.71664e-05	0.13	0.08	1RCP	92.315	31.6854
140	-1621.09	0.007628	4.78659	0.000308405	5.67439e-05	5.67439e-05	0.17	0.13	5RCP	92.2369	31.7629
141	-1621.09	0.007647	4.79852	0.000302257	5.56127e-05	5.56127e-05	0.13	0.08	3RCP	92.2991	31.7009
142	-1621.09	0.007674	4.81546	0.000293731	5.40439e-05	5.40439e-05	0.13	0.08	1RCP	92.3083	31.6893
143	-1621.09	0.007682	4.82048	0.000291251	5.35877e-05	5.35877e-05	0.15	0.09	3RCP	92.2728	31.7271
144	-1621.09	0.007721	4.84495	0.000279459	5.14179e-05	5.14179e-05	0.16	0.11	5RCP	92.2791	31.7195
145	-1621.09	0.007749	4.86252	0.000271288	4.99146e-05	4.99146e-05	0.15	0.12	6RCP	92.2391	31.7584
146	-1621.09	0.007898	4.95602	0.00023166	4.26234e-05	4.26234e-05	0.15	0.09	1RCP	92.3092	31.6896
147	-1621.09	0.008001	5.02065	0.000207704	3.82156e-05	3.82156e-05	0.17	0.13	4RCP	92.2392	31.7607
148	-1621.09	0.008003	5.02191	0.000207264	3.81347e-05	3.81347e-05	0.13	0.09	Acyclic	92.2962	31.704
149	-1621.09	0.008008	5.02504	0.000206169	3.79332e-05	3.79332e-05	0.16	0.11	4RCP	92.2483	31.7536
150	-1621.09	0.008077	5.06834	0.00019163	3.52583e-05	3.52583e-05	0.15	0.11	3RCP	92.2719	31.7284
151	-1621.09	0.008115	5.09219	0.000184066	3.38666e-05	3.38666e-05	0.15	0.1	5RCP	92.2516	31.749
152	-1621.09	0.008129	5.10097	0.000181356	3.33678e-05	3.33678e-05	0.15	0.09	1RCP	92.2881	31.7113
153	-1621.09	0.008149	5.11352	0.000177552	3.2668e-05	3.2668e-05	0.14	0.09	Acyclic	92.3188	31.6796
154	-1621.09	0.00816	5.12042	0.000175494	3.22894e-05	3.22894e-05	0.13	0.08	Acyclic	92.3178	31.6828
155	-1621.09	0.008186	5.13674	0.000170724	3.14118e-05	3.14118e-05	0.12	0.08	Acyclic	92.3086	31.6925
156	-1621.09	0.008204	5.14803	0.000167499	3.08183e-05	3.08183e-05	0.15	0.11	1RCP	92.2612	31.7405
157	-1621.09	0.008209	5.15117	0.000166613	3.06554e-05	3.06554e-05	0.14	0.08	1RCP	92.2999	31.7009
158	-1621.09	0.008228	5.16309	0.000163292	3.00443e-05	3.00443e-05	0.15	0.11	3RCP	92.2506	31.7513
159	-1621.09	0.008237	5.16874	0.000161742	2.97591e-05	2.97591e-05	0.13	0.08	1RCP	92.2989	31.7019
160	-1621.09	0.008255	5.18004	0.000158686	2.91968e-05	2.91968e-05	0.12	0.08	Acyclic	92.332	31.6668
161	-1621.09	0.008261	5.1838	0.00015768	2.90117e-05	2.90117e-05	0.14	0.1	2RCP	92.3082	31.6912
162	-1621.08	0.008367	5.25032	0.000140925	2.5929e-05	2.5929e-05	0.12	0.08	Acyclic	92.3304	31.6679
163	-1621.08	0.008395	5.26789	0.000136805	2.51709e-05	2.51709e-05	0.14	0.1	5RCP	92.2841	31.7191
164	-1621.08	0.008401	5.27165	0.000135938	2.50113e-05	2.50113e-05	0.18	0.13	4RCP	92.2548	31.7456
165	-1621.08	0.008572	5.37896	0.000113406	2.08656e-05	2.08656e-05	0.14	0.1	1RCP	92.3308	31.6675
166	-1621.08	0.008692	5.45426	9.98627e-05	1.83739e-05	1.83739e-05	0.13	0.08	1RCP	92.3042	31.6969
167	-1621.08	0.008754	5.49316	9.35119e-05	1.72054e-05	1.72054e-05	0.15	0.1	2RCP	92.2996	31.6998
168	-1621.08	0.008758	5.49567	9.31164e-05	1.71326e-05	1.71326e-05	0.15	0.11	1RCP	92.335	31.6683
169	-1621.08	0.008759	5.4963	9.30177e-05	1.71144e-05	1.71144e-05	0.14	0.1	1RCP	92.3342	31.6653
170	-1621.08	0.00876	5.49693	9.29192e-05	1.70963e-05	1.70963e-05	0.14	0.09	Acyclic	92.3103	31.6908
171	-1621.08	0.008769	5.50257	9.20371e-05	1.6934e-05	1.6934e-05	0.14	0.09	Acyclic	92.3085	31.6931
172	-1621.08	0.00878	5.50948	9.09704e-05	1.67378e-05	1.67378e-05	0.14	0.09	1RCP	92.3032	31.6974
173	-1621.08	0.00879	5.51575	9.00114e-05	1.65613e-05	1.65613e-05	0.17	0.13	5RCP	92.2327	31.7667
174	-1621.08	0.008793	5.51763	8.97257e-05	1.65087e-05	1.65087e-05	0.14	0.09	Acyclic	92.2976	31.6991
175	-1621.08	0.008809	5.52767	8.82171e-05	1.62312e-05	1.62312e-05	0.16	0.13	6RCP	92.2337	31.7634
176	-1621.08	0.008853	5.55528	8.41979e-05	1.54917e-05	1.54917e-05	0.15	0.11	2RCP	92.2517	31.7482
177	-1621.08	0.008866	5.56344	8.30458e-05	1.52797e-05	1.52797e-05	0.16	0.11	3RCP	92.2666	31.7318
178	-1621.08	0.008872	5.56721	8.25194e-05	1.51828e-05	1.51828e-05	0.17	0.13	5RCP	92.2406	31.7608
179	-1621.08	0.009075	5.69459	6.65462e-05	1.22439e-05	1.22439e-05	0.16	0.12	3RCP	92.2325	31.7667
180	-1621.08	0.009092	5.70526	6.5358e-05	1.20253e-05	1.20253e-05	0.14	0.09	1RCP	92.3224	31.6776
181	-1621.08	0.009117	5.72094	6.36491e-05	1.17109e-05	1.17109e-05	0.13	0.08	Acyclic	92.3266	31.6725
182	-1621.08	0.009241	5.79876	5.5811e-05	1.02687e-05	1.02687e-05	0.13	0.09	Acyclic	92.3246	31.6747
183	-1621.08	0.009283	5.82511	5.33812e-05	9.82167e-06	9.82167e-06	0.15	0.1	1RCP	92.3258	31.6735
184	-1621.08	0.009301	5.83641	5.23726e-05	9.63609e-06	9.63609e-06	0.13	0.09	Acyclic	92.3034	31.6944
185	-1621.08	0.009317	5.84645	5.1492e-05	9.47407e-06	9.47407e-06	0.14	0.09	1RCP	92.3165	31.6828
186	-1621.08	0.009331	5.85523	5.07336e-05	9.33454e-06	9.33454e-06	0.14	0.09	4RCP	92.2636	31.7367
187	-1621.08	0.009352	5.86841	4.9617e-05	9.12909e-06	9.12909e-06	0.17	0.12	3RCP	92.2758	31.7238
188	-1621.08	0.009431	5.91798	4.5632e-05	8.39589e-06	8.39589e-06	0.14	0.09	4RCP	92.2842	31.7132
189	-1621.08	0.009447	5.92802	4.48648e-05	8.25472e-06	8.25472e-06	0.15	0.09	Acyclic	92.3259	31.6754
190	-1621.08	0.009604	6.02654	3.79878e-05	6.98942e-06	6.98942e-06	0.13	0.09	Acyclic	92.3387	31.6611
191	-1621.08	0.009627	6.04097	3.70731e-05	6.82111e-06	6.82111e-06	0.14	0.09	Acyclic	92.327	31.6718
192	-1621.08	0.009636	6.04662	3.67211e-05	6.75636e-06	6.75636e-06	0.12	0.08	Acyclic	92.3275	31.6739
193	-1621.08	0.00969	6.0805	3.46786e-05	6.38056e-06	6.38056e-06	0.18	0.13	4RCP	92.2449	31.7555
194	-1621.08	0.009717	6.09745	3.37004e-05	6.20057e-06	6.20057e-06	0.15	0.11	2RCP	92.2479	31.7523
195	-1621.08	0.009727	6.10372	3.33451e-05	6.13521e-06	6.13521e-06	0.13	0.09	Acyclic	92.3161	31.6848
196	-1621.08	0.009735	6.10874	3.30636e-05	6.08341e-06	6.08341e-06	0.14	0.09	Acyclic	92.3377	31.6614
197	-1621.08	0.009854	6.18341	2.9146e-05	5.36261e-06	5.36261e-06	0.14	0.09	2RCP	92.277	31.724
198	-1621.08	0.009858	6.18592	2.90227e-05	5.33992e-06	5.33992e-06	0.14	0.09	1RCP	92.3064	31.6922
199	-1621.08	0.009907	6.21667	2.7554e-05	5.0697e-06	5.0697e-06	0.13	0.09	1RCP	92.3175	31.6816
200	-1621.08	0.009961	6.25056	2.60214e-05	4.78771e-06	4.78771e-06	0.17	0.12	3RCP	92.2692	31.7315
201	-1621.08	0.009974	6.25871	2.56654e-05	4.7222e-06	4.7222e-06	0.14	0.09	2RCP	92.2768	31.7222
202	-1621.08	0.010031	6.29448	2.41609e-05	4.44539e-06	4.44539e-06	0.13	0.09	3RCP	92.2943	31.7048
203	-1621.08	0.010033	6.29574	2.41097e-05	4.43597e-06	4.43597e-06	0.14	0.09	2RCP	92.2766	31.7219
204	-1621.08	0.010139	6.36225	2.15479e-05	3.96462e-06	3.96462e-06	0.14	0.09	Acyclic	92.3292	31.6696
205	-1621.08	0.010153	6.37104	2.12305e-05	3.90623e-06	3.90623e-06	0.14	0.09	Acyclic	92.3184	31.6831
206	-1621.08	0.010266	6.44195	1.88344e-05	3.46536e-06	3.46536e-06	0.14	0.09	Acyclic	92.3283	31.6701
207	-1621.08	0.010332	6.48336	1.7562e-05	3.23125e-06	3.23125e-06	0.13	0.09	1RCP	92.3015	31.6979
208	-1621.08	0.010569	6.63208	1.36613e-05	2.51356e-06	2.51356e-06	0.13	0.09	1RCP	92.3022	31.696
209	-1621.08	0.010573	6.63459	1.36035e-05	2.50292e-06	2.50292e-06	0.16	0.13	2RCP	92.2659	31.7334
210	-1621.08	0.010619	6.66345	1.29562e-05	2.38383e-06	2.38383e-06	0.16	0.12	4RCP	92.2828	31.7184
211	-1621.08	0.010737	6.7375	1.14332e-05	2.10361e-06	2.10361e-06	0.16	0.12	3RCP	92.247	31.7517
212	-1621.08	0.010739	6.73875	1.1409e-05	2.09915e-06	2.09915e-06	0.14	0.09	Acyclic	92.3332	31.6663
213	-1621.08	0.010902	6.84104	9.59897e-06	1.76612e-06	1.76612e-06	0.15	0.1	2RCP	92.3176	31.6808
214	-1621.08	0.010937	6.863	9.24944e-06	1.70181e-06	1.70181e-06	0.14	0.09	Acyclic	92.3348	31.6653
215	-1621.08	0.011025	6.91822	8.42582e-06	1.55028e-06	1.55028e-06	0.13	0.09	Acyclic	92.324	31.6765
216	-1621.08	0.011482	7.20499	5.19126e-06	9.55145e-07	9.55145e-07	0.16	0.12	2RCP	92.2638	31.7346
	0			5.43504	1	1				2.25956	120.778

## Sheet: LDM
LDM — ajoene_z_1_LIDI_matrix
	S1	S2	S3	O4	C5	C6	C7	C8	C9	C10	C11	C12	C13	H14	H15	H16	H17	H18	H19	H20	H21	H22	H23	H24	H25	H26	H27		N_loc (trace)	Off-diagonal sum
S1	12.9403	0.00327353	0.000839291	0.681125	0.468527	0.464436	0.0313768	0.0277419	0.0124231	0.0183513	0.000276041	9.21743e-05	0.000932934	0.0209199	0.0220461	0.0229316	0.0206134	0.00692331	0.00136915	0.000650504	0.00055996	3.31374e-05	0.000832242	0.00127136	5.14497e-05	0.00164403	8.54073e-05		92.2579	31.7419
S2	0.00327353	14.5262	0.643917	0.00121218	0.0173849	0.000258639	0.0563759	0.000199165	0.575274	0.000456575	0.0378041	0.0133496	0.0101965	0.00147801	0.0210742	6.70298e-05	2.93045e-05	0.00911152	1.13991e-05	0.0290925	0.00463726	0.00888358	1.56828e-05	3.84962e-05	0.000495704	0.000868313	0.000296105
S3	0.000839291	0.643917	14.6449	0.000812839	0.00185957	0.000142506	0.017925	6.25709e-05	0.0461705	0.000115628	0.527102	0.0414652	0.0217399	0.000581626	0.00133782	2.53032e-05	1.59543e-05	0.00156264	2.14446e-05	0.00874973	0.0271924	0.0276566	4.702e-06	2.3021e-05	0.00754663	0.00105931	0.0015998
O4	0.681125	0.00121218	0.000812839	8.33765	0.0614452	0.0606079	0.0102083	0.0112805	0.00419321	0.00309946	0.00374998	0.00109454	0.0118935	0.00850038	0.0047211	0.00357722	0.00840291	0.000903986	0.00613612	0.000146671	0.00895865	0.000213122	0.000366662	0.000238836	0.000520909	0.0262371	0.000874901
C5	0.468527	0.0173849	0.00185957	0.0614452	4.07702	0.0242236	0.518051	0.00823467	0.0343175	0.0055823	0.000254875	0.000153425	0.000601116	0.462983	0.445291	0.00477985	0.00382253	0.0192038	0.000193693	0.00544188	0.000276389	3.15388e-05	0.000723667	0.000167864	2.01565e-05	0.000790468	2.4021e-05
C6	0.464436	0.000258639	0.000142506	0.0606079	0.0242236	4.06469	0.00505871	0.518147	0.0018735	0.0373605	5.45463e-05	2.45959e-05	0.000236069	0.00439613	0.00235693	0.465159	0.46519	0.000407073	0.0186928	0.000177253	0.000172397	5.19371e-06	0.00620048	0.00629677	4.58347e-06	0.000345839	6.66198e-05
C7	0.0313768	0.0563759	0.017925	0.0102083	0.518051	0.00505871	3.96094	0.000933274	0.883077	0.000596278	0.00176825	0.00024976	0.000241148	0.0195022	0.0159866	0.000950678	0.000383344	0.469649	2.35141e-05	0.0264114	0.00202811	0.0003957	9.40127e-05	1.80499e-05	6.9532e-05	6.87119e-05	6.99296e-06
C8	0.0277419	0.000199165	6.25709e-05	0.0112805	0.00823467	0.518147	0.000933274	3.96938	0.000127299	0.913684	3.68946e-05	0.000649781	0.00403671	0.000679159	0.00911681	0.0189167	0.0178631	0.000250181	0.465004	1.63942e-05	1.51068e-05	1.34843e-05	0.030475	0.0296683	7.69322e-05	0.00488672	0.000617236
C9	0.0124231	0.575274	0.0461705	0.00419321	0.0343175	0.0018735	0.883077	0.000127299	4.08416	0.000219508	0.00392734	0.000717131	0.000321821	0.0103251	0.00376924	0.000464552	0.00021066	0.029438	7.98155e-06	0.46708	0.00378298	0.000456636	3.60161e-05	1.02501e-05	0.000163833	6.26898e-05	1.55077e-05
C10	0.0183513	0.000456575	0.000115628	0.00309946	0.0055823	0.0373605	0.000596278	0.913684	0.000219508	4.07607	3.8221e-05	0.000437012	0.00200236	0.000978823	0.0084824	0.00898894	0.00610348	0.000266565	0.0277801	2.15073e-05	1.74011e-05	1.09224e-05	0.481237	0.482052	3.66397e-05	0.00136156	0.000485059
C11	0.000276041	0.0378041	0.527102	0.00374998	0.000254875	5.45463e-05	0.00176825	3.68946e-05	0.00392734	3.8221e-05	4.02193	0.516723	0.0369416	4.44651e-05	0.000242956	5.05685e-06	1.22623e-05	0.000102938	4.85296e-05	0.000312021	0.454613	0.464374	1.48751e-06	1.94512e-05	0.0202967	0.00548626	0.00638804
C12	9.21743e-05	0.0133496	0.0414652	0.00109454	0.000153425	2.45959e-05	0.00024976	0.000649781	0.000717131	0.000437012	0.516723	3.97348	0.917614	2.33301e-05	0.000655876	3.00766e-06	8.42942e-06	1.79067e-05	0.000672166	0.000223584	0.0172038	0.0192919	1.15829e-05	0.000119576	0.474328	0.0269053	0.0311719
C13	0.000932934	0.0101965	0.0217399	0.0118935	0.000601116	0.000236069	0.000241148	0.00403671	0.000321821	0.00200236	0.0369416	0.917614	4.0978	6.07999e-05	0.00193991	1.9708e-05	6.75188e-05	3.81995e-05	0.00497417	0.000139111	0.00549432	0.00952693	8.9395e-05	0.000514779	0.0292444	0.456094	0.485353
H14	0.0209199	0.00147801	0.000581626	0.00850038	0.462983	0.00439613	0.0195022	0.000679159	0.0103251	0.000978823	4.44651e-05	2.33301e-05	6.07999e-05	0.398438	0.013583	0.000356234	0.00374451	0.000971294	9.5073e-05	0.000685766	5.50497e-05	1.35809e-05	0.000669852	5.75995e-05	2.56238e-06	7.62493e-05	1.92174e-06
H15	0.0220461	0.0210742	0.00133782	0.0047211	0.445291	0.00235693	0.0159866	0.00911681	0.00376924	0.0084824	0.000242956	0.000655876	0.00193991	0.013583	0.347227	0.000152592	0.000158213	0.00456659	0.000238789	0.000278861	9.718e-05	3.48209e-05	0.000477141	0.000207088	3.46868e-05	0.00132755	7.06543e-05
H16	0.0229316	6.70298e-05	2.53032e-05	0.00357722	0.00477985	0.465159	0.000950678	0.0189167	0.000464552	0.00898894	5.05685e-06	3.00766e-06	1.9708e-05	0.000356234	0.000152592	0.391671	0.014861	1.67591e-05	0.00144316	5.56534e-05	7.57572e-06	8.31929e-07	0.000474819	0.000787383	4.38833e-07	1.61824e-05	2.65641e-06
H17	0.0206134	2.93045e-05	1.59543e-05	0.00840291	0.00382253	0.46519	0.000383344	0.0178631	0.00021066	0.00610348	1.22623e-05	8.42942e-06	6.75188e-05	0.00374451	0.000158213	0.014861	0.401356	1.25544e-05	0.00482874	2.21511e-05	3.20781e-05	1.0896e-06	0.00380235	0.000440883	1.063e-06	8.76036e-05	2.60957e-05
H18	0.00692331	0.00911152	0.00156264	0.000903986	0.0192038	0.000407073	0.469649	0.000250181	0.029438	0.000266565	0.000102938	1.79067e-05	3.81995e-05	0.000971294	0.00456659	1.67591e-05	1.25544e-05	0.402743	5.02675e-06	0.00363187	6.55265e-05	1.95643e-05	1.14215e-05	1.11272e-05	4.9537e-06	2.59119e-05	1.46323e-06
H19	0.00136915	1.13991e-05	2.14446e-05	0.00613612	0.000193693	0.0186928	2.35141e-05	0.465004	7.98155e-06	0.0277801	4.85296e-05	0.000672166	0.00497417	9.5073e-05	0.000238789	0.00144316	0.00482874	5.02675e-06	0.385833	5.99327e-07	1.11161e-05	8.04979e-06	0.00651121	0.00352824	0.000105124	0.00546123	0.000967886
H20	0.000650504	0.0290925	0.00874973	0.000146671	0.00544188	0.000177253	0.0264114	1.63942e-05	0.46708	2.15073e-05	0.000312021	0.000223584	0.000139111	0.000685766	0.000278861	5.56534e-05	2.21511e-05	0.00363187	5.99327e-07	0.379643	0.000101418	1.84023e-05	4.48197e-06	1.00203e-06	1.34724e-05	7.86764e-06	7.6765e-06
H21	0.00055996	0.00463726	0.0271924	0.00895865	0.000276389	0.000172397	0.00202811	1.51068e-05	0.00378298	1.74011e-05	0.454613	0.0172038	0.00549432	5.50497e-05	9.718e-05	7.57572e-06	3.20781e-05	6.55265e-05	1.11161e-05	0.000101418	0.364801	0.013871	1.02898e-06	1.15028e-06	0.00483432	0.002965	0.00035812
H22	3.31374e-05	0.00888358	0.0276566	0.000213122	3.15388e-05	5.19371e-06	0.0003957	1.34843e-05	0.000456636	1.09224e-05	0.464374	0.0192919	0.00952693	1.35809e-05	3.48209e-05	8.31929e-07	1.0896e-06	1.95643e-05	8.04979e-06	1.84023e-05	0.013871	0.400032	3.14175e-07	1.25639e-06	0.00129419	0.000415314	0.000809944
H23	0.000832242	1.56828e-05	4.702e-06	0.000366662	0.000723667	0.00620048	9.40127e-05	0.030475	3.60161e-05	0.481237	1.48751e-06	1.15829e-05	8.9395e-05	0.000669852	0.000477141	0.000474819	0.00380235	1.14215e-05	0.00651121	4.48197e-06	1.02898e-06	3.14175e-07	0.416356	0.0167459	2.54941e-06	0.000103044	3.8339e-05
H24	0.00127136	3.84962e-05	2.3021e-05	0.000238836	0.000167864	0.00629677	1.80499e-05	0.0296683	1.02501e-05	0.482052	1.94512e-05	0.000119576	0.000514779	5.75995e-05	0.000207088	0.000787383	0.000440883	1.11272e-05	0.00352824	1.00203e-06	1.15028e-06	1.25639e-06	0.0167459	0.403578	5.47581e-06	7.10264e-05	0.000438806
H25	5.14497e-05	0.000495704	0.00754663	0.000520909	2.01565e-05	4.58347e-06	6.9532e-05	7.69322e-05	0.000163833	3.66397e-05	0.0202967	0.474328	0.0292444	2.56238e-06	3.46868e-05	4.38833e-07	1.063e-06	4.9537e-06	0.000105124	1.34724e-05	0.00483432	0.00129419	2.54941e-06	5.47581e-06	0.418278	0.0058137	0.0037273
H26	0.00164403	0.000868313	0.00105931	0.0262371	0.000790468	0.000345839	6.87119e-05	0.00488672	6.26898e-05	0.00136156	0.00548626	0.0269053	0.456094	7.62493e-05	0.00132755	1.61824e-05	8.76036e-05	2.59119e-05	0.00546123	7.86764e-06	0.002965	0.000415314	0.000103044	7.10264e-05	0.0058137	0.350221	0.0153189
H27	8.54073e-05	0.000296105	0.0015998	0.000874901	2.4021e-05	6.66198e-05	6.99296e-06	0.000617236	1.55077e-05	0.000485059	0.00638804	0.0311719	0.485353	1.92174e-06	7.06543e-05	2.65641e-06	2.60957e-05	1.46323e-06	0.000967886	7.6765e-06	0.00035812	0.000809944	3.8339e-05	0.000438806	0.0037273	0.0153189	0.423305
LDM — ajoene_z_2_LIDI_matrix
	S1	S2	S3	O4	C5	C6	C7	C8	C9	C10	C11	C12	C13	H14	H15	H16	H17	H18	H19	H20	H21	H22	H23	H24	H25	H26	H27
S1	12.9413	0.00336076	0.000904684	0.679804	0.46837	0.464871	0.0304429	0.0282014	0.0122024	0.0149887	0.000476848	0.000108682	0.000969237	0.0202308	0.0223985	0.0222454	0.0233434	0.00691738	0.00396729	0.000666465	0.000946242	4.95817e-05	0.000855969	0.000902214	5.03577e-05	0.00173482	0.000102534		92.2751	31.7241
S2	0.00336076	14.5403	0.643213	0.00105052	0.0183846	0.000224874	0.0541302	4.44915e-05	0.572928	7.09589e-05	0.0379093	0.0141315	0.00813829	0.00134521	0.0232726	6.18413e-05	8.70356e-05	0.00900952	6.92764e-06	0.0293975	0.00390475	0.00906535	2.07277e-05	3.099e-06	0.00064953	0.000360345	0.000266345
S3	0.000904684	0.643213	14.6436	0.00114191	0.00186868	0.000131877	0.0196161	2.33379e-05	0.0463088	5.57765e-05	0.529891	0.0404428	0.0193934	0.000636561	0.00130675	3.05252e-05	5.46419e-05	0.00160586	1.68109e-06	0.00659391	0.0264484	0.027889	7.92767e-06	2.19097e-06	0.008922	0.00101874	0.00158912
O4	0.679804	0.00105052	0.00114191	8.33607	0.0612028	0.0612515	0.0105307	0.00923294	0.00408218	0.00522584	0.00669528	0.00125017	0.0122283	0.00827999	0.00445087	0.00610833	0.00391602	0.000988274	0.000647374	0.00014456	0.0153427	0.000321448	0.000285212	0.000561725	0.000556854	0.026115	0.000943339
C5	0.46837	0.0183846	0.00186868	0.0612028	4.07973	0.0247671	0.518287	0.00671288	0.0342833	0.00499605	0.0003995	0.000477584	0.00156753	0.456706	0.448381	0.00420437	0.00566197	0.0190892	0.000333958	0.00543862	0.000505438	4.65899e-05	0.000751384	0.000132945	3.41019e-05	0.00100683	3.16332e-05
C6	0.464871	0.000224874	0.000131877	0.0612515	0.0247671	4.06803	0.00506464	0.519976	0.00165626	0.0372382	6.40527e-05	0.000200192	0.00132812	0.00253077	0.00431472	0.462449	0.458801	0.000498979	0.0197102	0.00017025	0.000159227	9.47891e-06	0.00617516	0.00631039	4.13903e-05	0.00268566	0.000100584
C7	0.0304429	0.0541302	0.0196161	0.0105307	0.518287	0.00506464	3.95964	0.000785574	0.884116	0.00049044	0.00169437	0.000230865	0.00026116	0.0186601	0.0165792	0.00101653	0.000480067	0.469242	2.28401e-05	0.0267097	0.00201132	0.000429276	0.000103573	1.1712e-05	6.87487e-05	7.20903e-05	6.9148e-06
C8	0.0282014	4.44915e-05	2.33379e-05	0.00923294	0.00671288	0.519976	0.000785574	3.98222	0.000323151	0.916749	1.61576e-05	1.95555e-05	0.000126317	0.0094669	0.000383404	0.0186701	0.0174266	3.32891e-05	0.473685	4.5819e-05	3.62282e-05	1.35457e-06	0.030062	0.0299028	6.42255e-06	0.000273472	1.14302e-05
C9	0.0122024	0.572928	0.0463088	0.00408218	0.0342833	0.00165626	0.884116	0.000323151	4.08237	0.000597891	0.00373159	0.000699615	0.000266628	0.0100257	0.00404597	0.000470531	7.48525e-05	0.0291631	1.19152e-05	0.468156	0.0032217	0.000474341	3.15943e-05	1.98198e-05	0.000158257	3.22277e-05	1.34593e-05
C10	0.0149887	7.09589e-05	5.57765e-05	0.00522584	0.00499605	0.0372382	0.00049044	0.916749	0.000597891	4.07829	1.41297e-05	6.48786e-06	3.74494e-05	0.00892724	0.000467411	0.00945121	0.00602835	4.15625e-05	0.029463	3.5157e-05	3.005e-05	1.57508e-06	0.479838	0.482715	1.00293e-06	5.42954e-05	4.24076e-06
C11	0.000476848	0.0379093	0.529891	0.00669528	0.0003995	6.40527e-05	0.00169437	1.61576e-05	0.00373159	1.41297e-05	4.02913	0.515755	0.0366042	4.84664e-05	0.000479278	6.31579e-06	4.65615e-05	9.79366e-05	2.25339e-06	0.000302973	0.450543	0.463198	1.37931e-06	1.10686e-06	0.0201064	0.00525957	0.0063617
C12	0.000108682	0.0141315	0.0404428	0.00125017	0.000477584	0.000200192	0.000230865	1.95555e-05	0.000699615	6.48786e-06	0.515755	3.97147	0.918294	4.53986e-05	0.00191271	1.4299e-05	0.00076568	2.88813e-05	1.04538e-05	0.000225669	0.0169209	0.0195964	6.45825e-06	4.25545e-07	0.473352	0.0277262	0.0311938
C13	0.000969237	0.00813829	0.0193934	0.0122283	0.00156753	0.00132812	0.00026116	0.000126317	0.000266628	3.74494e-05	0.0366042	0.918294	4.10489	0.000112944	0.00451947	7.54565e-05	0.0036458	7.56644e-05	6.19526e-05	0.000111888	0.00515425	0.0103461	2.42582e-05	2.0995e-06	0.0292143	0.460162	0.486199
H14	0.0202308	0.00134521	0.000636561	0.00827999	0.456706	0.00253077	0.0186601	0.0094669	0.0100257	0.00892724	4.84664e-05	4.53986e-05	0.000112944	0.377358	0.0133248	0.00027654	0.000250953	0.000832265	0.000228319	0.000644653	6.4132e-05	1.6251e-05	0.000877601	0.000210808	3.46375e-06	7.94143e-05	2.44976e-06
H15	0.0223985	0.0232726	0.00130675	0.00445087	0.448381	0.00431472	0.0165792	0.000383404	0.00404597	0.000467411	0.000479278	0.00191271	0.00451947	0.0133248	0.358969	0.000256296	0.00387347	0.00469333	0.000109218	0.000303778	0.000275699	7.84179e-05	0.000364687	3.47563e-05	6.52504e-05	0.0018412	0.000131012
H16	0.0222454	6.18413e-05	3.05252e-05	0.00610833	0.00420437	0.462449	0.00101653	0.0186701	0.000470531	0.00945121	6.31579e-06	1.4299e-05	7.54565e-05	0.00027654	0.000256296	0.384635	0.0143456	2.24753e-05	0.00151624	5.00357e-05	7.81079e-06	1.81294e-06	0.000501565	0.000783749	4.56168e-06	0.000174427	6.59742e-06
H17	0.0233434	8.70356e-05	5.46419e-05	0.00391602	0.00566197	0.458801	0.000480067	0.0174266	7.48525e-05	0.00602835	4.65615e-05	0.00076568	0.0036458	0.000250953	0.00387347	0.0143456	0.385646	0.000181834	0.0048764	1.0376e-05	1.07717e-05	1.65411e-05	0.0037198	0.000427789	9.26642e-05	0.00404402	0.000316718
H18	0.00691738	0.00900952	0.00160586	0.000988274	0.0190892	0.000498979	0.469242	3.32891e-05	0.0291631	4.15625e-05	9.79366e-05	2.88813e-05	7.56644e-05	0.000832265	0.00469333	2.24753e-05	0.000181834	0.401326	7.26007e-06	0.00356348	6.52405e-05	2.0911e-05	1.6767e-05	2.01224e-06	5.38909e-06	3.36626e-05	1.75523e-06
H19	0.00396729	6.92764e-06	1.68109e-06	0.000647374	0.000333958	0.0197102	2.28401e-05	0.473685	1.19152e-05	0.029463	2.25339e-06	1.04538e-05	6.19526e-05	0.000228319	0.000109218	0.00151624	0.0048764	7.26007e-06	0.407688	1.38886e-06	2.30075e-06	4.20733e-07	0.00674293	0.00366562	1.87248e-06	9.38256e-05	7.61469e-06
H20	0.000666465	0.0293975	0.00659391	0.00014456	0.00543862	0.00017025	0.0267097	4.5819e-05	0.468156	3.5157e-05	0.000302973	0.000225669	0.000111888	0.000644653	0.000303778	5.00357e-05	1.0376e-05	0.00356348	1.38886e-06	0.381573	7.73151e-05	2.11244e-05	3.2837e-06	8.36611e-07	1.47553e-05	4.27441e-06	6.5724e-06
H21	0.000946242	0.00390475	0.0264484	0.0153427	0.000505438	0.000159227	0.00201132	3.62282e-05	0.0032217	3.005e-05	0.450543	0.0169209	0.00515425	6.4132e-05	0.000275699	7.81079e-06	1.07717e-05	6.52405e-05	2.30075e-06	7.73151e-05	0.353386	0.0135401	1.18018e-06	2.67378e-06	0.00469834	0.00259293	0.000329369
H22	4.95817e-05	0.00906535	0.027889	0.000321448	4.65899e-05	9.47891e-06	0.000429276	1.35457e-06	0.000474341	1.57508e-06	0.463198	0.0195964	0.0103461	1.6251e-05	7.84179e-05	1.81294e-06	1.65411e-05	2.0911e-05	4.20733e-07	2.11244e-05	0.0135401	0.397776	2.51275e-07	9.0621e-08	0.00104775	0.000409503	0.000776586
H23	0.000855969	2.07277e-05	7.92767e-06	0.000285212	0.000751384	0.00617516	0.000103573	0.030062	3.15943e-05	0.479838	1.37931e-06	6.45825e-06	2.42582e-05	0.000877601	0.000364687	0.000501565	0.0037198	1.6767e-05	0.00674293	3.2837e-06	1.18018e-06	2.51275e-07	0.407938	0.0165453	4.07555e-07	1.52967e-05	4.68957e-06
H24	0.000902214	3.099e-06	2.19097e-06	0.000561725	0.000132945	0.00631039	1.1712e-05	0.0299028	1.98198e-05	0.482715	1.10686e-06	4.25545e-07	2.0995e-06	0.000210808	3.47563e-05	0.000783749	0.000427789	2.01224e-06	0.00366562	8.36611e-07	2.67378e-06	9.0621e-08	0.0165453	0.404909	1.10044e-07	3.46846e-06	3.37816e-07
H25	5.03577e-05	0.00064953	0.008922	0.000556854	3.41019e-05	4.13903e-05	6.87487e-05	6.42255e-06	0.000158257	1.00293e-06	0.0201064	0.473352	0.0292143	3.46375e-06	6.52504e-05	4.56168e-06	9.26642e-05	5.38909e-06	1.87248e-06	1.47553e-05	0.00469834	0.00104775	4.07555e-07	1.10044e-07	0.415676	0.00593988	0.00374432
H26	0.00173482	0.000360345	0.00101874	0.026115	0.00100683	0.00268566	7.20903e-05	0.000273472	3.22277e-05	5.42954e-05	0.00525957	0.0277262	0.460162	7.94143e-05	0.0018412	0.000174427	0.00404402	3.36626e-05	9.38256e-05	4.27441e-06	0.00259293	0.000409503	1.52967e-05	3.46846e-06	0.00593988	0.359232	0.0154984
H27	0.000102534	0.000266345	0.00158912	0.000943339	3.16332e-05	0.000100584	6.9148e-06	1.14302e-05	1.34593e-05	4.24076e-06	0.0063617	0.0311938	0.486199	2.44976e-06	0.000131012	6.59742e-06	0.000316718	1.75523e-06	7.61469e-06	6.5724e-06	0.000329369	0.000776586	4.68957e-06	3.37816e-07	0.00374432	0.0154984	0.421872
LDM — ajoene_z_3_LIDI_matrix
	S1	S2	S3	O4	C5	C6	C7	C8	C9	C10	C11	C12	C13	H14	H15	H16	H17	H18	H19	H20	H21	H22	H23	H24	H25	H26	H27
S1	12.9356	0.00289883	0.000404355	0.685792	0.463299	0.463329	0.0279929	0.0312229	0.0139822	0.016589	0.000100142	0.000422196	0.000948802	0.0186757	0.0222407	0.0221073	0.0214801	0.00318945	0.00325381	0.000949844	3.32397e-05	2.24019e-05	0.000710713	0.000879448	2.10591e-05	0.000280463	0.000273828		92.2342	31.7652
S2	0.00289883	14.5088	0.652577	0.00149033	0.0152214	0.000641365	0.0636773	0.00119673	0.573872	0.00912379	0.0382328	0.00829118	0.00389496	0.0153452	0.00171584	6.57279e-05	0.00139691	0.00881563	0.000337784	0.0273792	0.00852448	0.00591273	0.0213561	0.000563025	0.000556671	0.000329275	0.000172838
S3	0.000404355	0.652577	14.6258	0.000374524	0.00188061	0.000212851	0.0100353	8.41411e-05	0.0404676	0.00044704	0.53033	0.0389326	0.0187328	0.00157243	0.000208787	1.22252e-05	0.00035709	0.00134084	2.17375e-05	0.013499	0.0274054	0.0287555	0.000997961	2.65202e-05	0.00773699	0.00113689	0.00149725
O4	0.685792	0.00149033	0.000374524	8.36343	0.0617051	0.0625491	0.0171814	0.00940284	0.00285227	0.00586093	2.79658e-05	7.79822e-05	0.00018454	0.00770886	0.00320137	0.00728019	0.00343254	0.0167688	0.000543277	0.000273326	1.12088e-05	1.03338e-05	0.000294096	0.000576719	6.18443e-06	9.0131e-05	9.07091e-05
C5	0.463299	0.0152214	0.00188061	0.0617051	4.07404	0.0243992	0.517579	0.00519787	0.0351534	0.00474576	0.000120744	0.000110803	0.000169591	0.455991	0.464368	0.00407489	0.00480831	0.0174466	0.000291311	0.00549827	4.16477e-05	2.30868e-05	0.000859514	0.000118108	2.72837e-05	2.82886e-05	1.60036e-05
C6	0.463329	0.000641365	0.000212851	0.0625491	0.0243992	4.07967	0.00768381	0.520369	0.00339921	0.0364788	9.84026e-05	0.00174905	0.00580929	0.00282896	0.00497276	0.464139	0.448452	0.00021154	0.0198199	0.000118288	4.2802e-05	2.40989e-05	0.00528639	0.00633124	6.36749e-05	0.00139552	0.00117809
C7	0.0279929	0.0636773	0.0100353	0.0171814	0.517579	0.00768381	3.96034	0.000684568	0.880229	0.000480197	0.00169874	0.00149463	0.00197746	0.016649	0.0195509	0.000534209	0.0112956	0.457983	0.000199802	0.0248828	0.000520075	0.000150536	0.000501367	2.1649e-05	0.000107245	7.35744e-05	7.96073e-05
C8	0.0312229	0.00119673	8.41411e-05	0.00940284	0.00519787	0.520369	0.000684568	3.98156	0.000324999	0.913501	8.12254e-05	0.000308722	0.00178811	0.00653534	0.000571615	0.0187605	0.0167573	9.49388e-05	0.47436	1.79889e-05	7.19083e-06	0.000223726	0.0280196	0.0300844	6.97329e-05	0.00404294	0.000128138
C9	0.0139822	0.573872	0.0404676	0.00285227	0.0351534	0.00339921	0.880229	0.000324999	4.10143	0.000448189	0.0020688	0.00725186	0.00457483	0.00369344	0.0100701	0.000240486	0.00692862	0.0278757	0.000170481	0.463721	0.000427382	0.000259064	0.000908231	3.59864e-05	0.000943039	0.000118148	0.000150376
C10	0.016589	0.00912379	0.00044704	0.00586093	0.00474576	0.0364788	0.000480197	0.913501	0.000448189	4.08857	0.000442357	0.000637379	0.00387738	0.00872204	0.000463016	0.00834386	0.00514947	0.000119086	0.0297012	5.88213e-05	2.19145e-05	0.00119167	0.465425	0.483603	0.000159572	0.00814735	0.000228667
C11	0.000100142	0.0382328	0.53033	2.79658e-05	0.000120744	9.84026e-05	0.00169874	8.12254e-05	0.0020688	0.000442357	4.01482	0.516258	0.036685	7.43498e-05	4.43943e-05	1.12532e-05	0.00020415	9.99789e-05	2.27242e-05	0.000359298	0.461871	0.462617	0.00161077	2.36307e-05	0.0197553	0.00595383	0.00626004
C12	0.000422196	0.00829118	0.0389326	7.79822e-05	0.000110803	0.00174905	0.00149463	0.000308722	0.00725186	0.000637379	0.516258	3.97021	0.912697	1.57796e-05	4.81605e-05	8.346e-05	0.00403979	5.98283e-05	6.94322e-05	0.00178833	0.0195151	0.0182701	0.00118689	4.10355e-05	0.471745	0.0290925	0.0299136
C13	0.000948802	0.00389496	0.0187328	0.00018454	0.000169591	0.00580929	0.00197746	0.00178811	0.00457483	0.00387738	0.036685	0.912697	4.07628	2.4283e-05	7.48363e-05	0.000366605	0.0122062	6.37657e-05	0.000154801	0.000472513	0.0103187	0.00607792	0.00382435	0.000139505	0.0287072	0.472886	0.481348
H14	0.0186757	0.0153452	0.00157243	0.00770886	0.455991	0.00282896	0.016649	0.00653534	0.00369344	0.00872204	7.43498e-05	1.57796e-05	2.4283e-05	0.376718	0.014393	0.000331994	0.000400231	0.00449329	0.000143478	0.000231301	2.18957e-05	2.3495e-05	0.00199479	0.000230768	3.63492e-06	2.48233e-05	2.24662e-06
H15	0.0222407	0.00171584	0.000208787	0.00320137	0.464368	0.00497276	0.0195509	0.000571615	0.0100701	0.000463016	4.43943e-05	4.81605e-05	7.48363e-05	0.014393	0.390168	0.000981863	0.000393872	0.00078277	1.68772e-05	0.000674092	1.71559e-05	3.94955e-06	0.000122503	1.58718e-05	2.20469e-06	6.8279e-06	5.80565e-06
H16	0.0221073	6.57279e-05	1.22252e-05	0.00728019	0.00407489	0.464139	0.000534209	0.0187605	0.000240486	0.00834386	1.12532e-05	8.346e-05	0.000366605	0.000331994	0.000981863	0.388797	0.0138104	1.74124e-05	0.00195681	6.62038e-06	1.95341e-06	3.32603e-06	0.00043305	0.000793681	3.73868e-06	9.08206e-05	0.000237273
H17	0.0214801	0.00139691	0.00035709	0.00343254	0.00480831	0.448452	0.0112956	0.0167573	0.00692862	0.00514947	0.00020415	0.00403979	0.0122062	0.000400231	0.000393872	0.0138104	0.361806	0.000406974	0.00440889	0.000150206	0.00011213	1.91558e-05	0.00239378	0.00034028	0.000117959	0.00168068	0.00201903
H18	0.00318945	0.00881563	0.00134084	0.0167688	0.0174466	0.00021154	0.457983	9.49388e-05	0.0278757	0.000119086	9.99789e-05	5.98283e-05	6.37657e-05	0.00449329	0.00078277	1.74124e-05	0.000406974	0.363455	8.86114e-06	0.00347101	3.60971e-05	7.91476e-06	2.7966e-05	3.74694e-06	1.53485e-05	3.05943e-06	4.43263e-06
H19	0.00325381	0.000337784	2.17375e-05	0.000543277	0.000291311	0.0198199	0.000199802	0.47436	0.000170481	0.0297012	2.27242e-05	6.94322e-05	0.000154801	0.000143478	1.68772e-05	0.00195681	0.00440889	8.86114e-06	0.411604	7.27774e-06	1.03674e-06	6.12246e-05	0.00627152	0.00374635	4.98538e-06	0.000126119	1.96099e-05
H20	0.000949844	0.0273792	0.013499	0.000273326	0.00549827	0.000118288	0.0248828	1.79889e-05	0.463721	5.88213e-05	0.000359298	0.00178833	0.000472513	0.000231301	0.000674092	6.62038e-06	0.000150206	0.00347101	7.27774e-06	0.371757	2.53878e-05	0.000180437	0.000112138	3.20361e-06	0.000980078	2.96883e-05	2.10246e-05
H21	3.32397e-05	0.00852448	0.0274054	1.12088e-05	4.16477e-05	4.2802e-05	0.000520075	7.19083e-06	0.000427382	2.19145e-05	0.461871	0.0195151	0.0103187	2.18957e-05	1.71559e-05	1.95341e-06	0.00011213	3.60971e-05	1.03674e-06	2.53878e-05	0.392817	0.0143898	0.000109145	8.99259e-07	0.00110679	0.000462702	0.000753349
H22	2.24019e-05	0.00591273	0.0287555	1.03338e-05	2.30868e-05	2.40989e-05	0.000150536	0.000223726	0.000259064	0.00119167	0.462617	0.0182701	0.00607792	2.3495e-05	3.94955e-06	3.32603e-06	1.91558e-05	7.91476e-06	6.12246e-05	0.000180437	0.0143898	0.393079	0.00234306	5.30408e-05	0.0051522	0.00380958	0.000438436
H23	0.000710713	0.0213561	0.000997961	0.000294096	0.000859514	0.00528639	0.000501367	0.0280196	0.000908231	0.465425	0.00161077	0.00118689	0.00382435	0.00199479	0.000122503	0.00043305	0.00239378	2.7966e-05	0.00627152	0.000112138	0.000109145	0.00234306	0.382183	0.0157276	0.000115459	0.00421604	0.000214172
H24	0.000879448	0.000563025	2.65202e-05	0.000576719	0.000118108	0.00633124	2.1649e-05	0.0300844	3.59864e-05	0.483603	2.36307e-05	4.10355e-05	0.000139505	0.000230768	1.58718e-05	0.000793681	0.00034028	3.74694e-06	0.00374635	3.20361e-06	8.99259e-07	5.30408e-05	0.0157276	0.409049	3.96559e-06	0.000239643	6.82108e-06
H25	2.10591e-05	0.000556671	0.00773699	6.18443e-06	2.72837e-05	6.36749e-05	0.000107245	6.97329e-05	0.000943039	0.000159572	0.0197553	0.471745	0.0287072	3.63492e-06	2.20469e-06	3.73868e-06	0.000117959	1.53485e-05	4.98538e-06	0.000980078	0.00110679	0.0051522	0.000115459	3.96559e-06	0.409054	0.00646799	0.0036694
H26	0.000280463	0.000329275	0.00113689	9.0131e-05	2.82886e-05	0.00139552	7.35744e-05	0.00404294	0.000118148	0.00814735	0.00595383	0.0290925	0.472886	2.48233e-05	6.8279e-06	9.08206e-05	0.00168068	3.05943e-06	0.000126119	2.96883e-05	0.000462702	0.00380958	0.00421604	0.000239643	0.00646799	0.397246	0.0162778
H27	0.000273828	0.000172838	0.00149725	9.07091e-05	1.60036e-05	0.00117809	7.96073e-05	0.000128138	0.000150376	0.000228667	0.00626004	0.0299136	0.481348	2.24662e-06	5.80565e-06	0.000237273	0.00201903	4.43263e-06	1.96099e-05	2.10246e-05	0.000753349	0.000438436	0.000214172	6.82108e-06	0.0036694	0.0162778	0.405933
LDM — ajoene_z_4_LIDI_matrix
	S1	S2	S3	O4	C5	C6	C7	C8	C9	C10	C11	C12	C13	H14	H15	H16	H17	H18	H19	H20	H21	H22	H23	H24	H25	H26	H27
S1	12.9296	0.0033129	0.000897845	0.679285	0.466411	0.463444	0.0300735	0.0299984	0.0124565	0.0206894	0.000449319	0.000102329	0.000954079	0.0221865	0.0200906	0.0221697	0.0240366	0.00661216	0.00136962	0.000670319	0.000903353	4.64589e-05	0.00161065	0.000895364	5.00609e-05	0.00173912	0.000106776		92.2693	31.7302
S2	0.0033129	14.5381	0.643324	0.00114322	0.0181391	0.000225516	0.0546955	4.84021e-05	0.573597	4.68132e-05	0.0379228	0.0138797	0.00838165	0.0231258	0.00137325	7.12529e-05	7.20415e-05	0.00902024	3.28007e-05	0.0293052	0.00406922	0.00903819	4.55698e-06	1.99857e-06	0.000606541	0.00040932	0.000267481
S3	0.000897845	0.643324	14.6431	0.00109811	0.00188533	0.000132673	0.0191605	2.2099e-05	0.0462536	4.33856e-05	0.529471	0.0405821	0.0197113	0.00136282	0.000618713	3.29725e-05	5.62683e-05	0.00158809	1.35633e-05	0.00724955	0.0265328	0.0278675	2.25615e-06	1.94645e-06	0.00869603	0.00102946	0.00159268
O4	0.679285	0.00114322	0.00109811	8.33556	0.0615133	0.0611912	0.011815	0.0101091	0.00451608	0.00636562	0.00622996	0.0012415	0.0121239	0.00413152	0.00842253	0.00444199	0.00530262	0.0010681	0.000623503	0.000154163	0.0143198	0.00030773	0.000446221	0.000471277	0.000550136	0.0260624	0.000929139
C5	0.466411	0.0181391	0.00188533	0.0615133	4.07686	0.0243172	0.51801	0.00780606	0.034284	0.00235552	0.000344871	0.000363785	0.00124715	0.450199	0.459021	0.00468299	0.00414345	0.0191513	0.00341157	0.00544108	0.000414731	4.08402e-05	0.00018811	8.28076e-05	2.80203e-05	0.00084195	2.63652e-05
C6	0.463444	0.000225516	0.000132673	0.0611912	0.0243172	4.06881	0.00497123	0.519185	0.00164076	0.037407	5.77342e-05	0.000213195	0.00141719	0.00444069	0.00189635	0.463824	0.460231	0.000479383	0.0195258	0.000163885	0.000144797	9.18866e-06	0.00606861	0.00633503	4.36792e-05	0.0028404	0.000110749
C7	0.0300735	0.0546955	0.0191605	0.011815	0.51801	0.00497123	3.95808	0.000827398	0.883434	0.000198529	0.00170415	0.000232711	0.000245314	0.0166517	0.0190127	0.00100757	0.000351919	0.469121	0.000386913	0.0265702	0.00201233	0.000414865	2.04502e-05	8.61873e-06	6.83814e-05	6.39268e-05	6.52433e-06
C8	0.0299984	4.84021e-05	2.2099e-05	0.0101091	0.00780606	0.519185	0.000827398	3.98072	0.000308678	0.917304	1.4529e-05	1.69669e-05	0.000119871	0.000603548	0.0095159	0.0181073	0.0177742	4.14598e-05	0.472358	4.40515e-05	3.25202e-05	1.16256e-06	0.0299128	0.029906	6.01094e-06	0.000243848	1.09799e-05
C9	0.0124565	0.573597	0.0462536	0.00451608	0.034284	0.00164076	0.883434	0.000308678	4.08225	0.000397074	0.00384736	0.000700798	0.000272691	0.0039879	0.0100016	0.000521234	6.87884e-05	0.0291339	0.000159871	0.467737	0.00342628	0.000471895	1.64595e-05	1.60077e-05	0.000160663	3.60637e-05	1.37953e-05
C10	0.0206894	4.68132e-05	4.33856e-05	0.00636562	0.00235552	0.037407	0.000198529	0.917304	0.000397074	4.07914	1.4606e-05	1.86151e-05	0.000111454	0.000306895	0.00284276	0.00718965	0.00635251	4.58873e-05	0.029549	1.86891e-05	3.20915e-05	1.19395e-06	0.480439	0.482832	3.59495e-06	0.000161916	1.0314e-05
C11	0.000449319	0.0379228	0.529471	0.00622996	0.000344871	5.77342e-05	0.00170415	1.4529e-05	0.00384736	1.4606e-05	4.02825	0.515991	0.0366743	0.000380679	4.48559e-05	5.73954e-06	5.1858e-05	9.91719e-05	2.74427e-06	0.000303563	0.45106	0.463325	7.66433e-07	7.86496e-07	0.0201158	0.00532152	0.00636104
C12	0.000102329	0.0138797	0.0405821	0.0012415	0.000363785	0.000213195	0.000232711	1.69669e-05	0.000700798	1.86151e-05	0.515991	3.97179	0.918573	0.00152336	3.88187e-05	1.17505e-05	0.000830647	2.46596e-05	3.65208e-06	0.000223702	0.0169935	0.0195636	1.1126e-06	2.42031e-06	0.473496	0.0277527	0.0311884
C13	0.000954079	0.00838165	0.0197113	0.0121239	0.00124715	0.00141719	0.000245314	0.000119871	0.000272691	0.000111454	0.0366743	0.918573	4.10445	0.00362159	9.92275e-05	6.67658e-05	0.0041675	6.39814e-05	1.11697e-05	0.000114544	0.00519536	0.0102532	6.39297e-06	1.226e-05	0.0292026	0.459894	0.486143
H14	0.0221865	0.0231258	0.00136282	0.00413152	0.450199	0.00444069	0.0166517	0.000603548	0.0039879	0.000306895	0.000380679	0.00152336	0.00362159	0.36184	0.0136368	0.000300827	0.00309173	0.00475024	0.000454428	0.000300436	0.000187726	6.40284e-05	5.43963e-05	2.14806e-05	5.32891e-05	0.00148985	0.000105827
H15	0.0200906	0.00137325	0.000618713	0.00842253	0.459021	0.00189635	0.0190127	0.0095159	0.0100016	0.00284276	4.48559e-05	3.88187e-05	9.92275e-05	0.0136368	0.386226	0.000194957	0.000161036	0.000910085	0.0048096	0.000650079	5.94318e-05	1.44416e-05	0.000153907	9.70153e-05	2.99778e-06	7.16654e-05	2.21029e-06
H16	0.0221697	7.12529e-05	3.29725e-05	0.00444199	0.00468299	0.463824	0.00100757	0.0181073	0.000521234	0.00718965	5.73954e-06	1.17505e-05	6.67658e-05	0.000300827	0.000194957	0.388448	0.0145422	1.77828e-05	0.00412122	5.15325e-05	6.88218e-06	2.05808e-06	0.00300647	0.000462425	2.49778e-06	0.000124264	6.2673e-06
H17	0.0240366	7.20415e-05	5.62683e-05	0.00530262	0.00414345	0.460231	0.000351919	0.0177742	6.87884e-05	0.00635251	5.1858e-05	0.000830647	0.0041675	0.00309173	0.000161036	0.0145422	0.383226	0.000162129	0.00224598	6.02413e-06	1.34539e-05	1.65763e-05	0.000443213	0.000802823	0.000108815	0.00486423	0.000366235
H18	0.00661216	0.00902024	0.00158809	0.0010681	0.0191513	0.000479383	0.469121	4.14598e-05	0.0291339	4.58873e-05	9.91719e-05	2.46596e-05	6.39814e-05	0.00475024	0.000910085	1.77828e-05	0.000162129	0.400834	2.7049e-05	0.00357449	6.54683e-05	2.02785e-05	3.87879e-06	1.83185e-06	5.18854e-06	2.84643e-05	1.49584e-06
H19	0.00136962	3.28007e-05	1.35633e-05	0.000623503	0.00341157	0.0195258	0.000386913	0.472358	0.000159871	0.029549	2.74427e-06	3.65208e-06	1.11697e-05	0.000454428	0.0048096	0.00412122	0.00224598	2.7049e-05	0.409664	1.95662e-05	3.54161e-06	5.78446e-07	0.00671495	0.00368213	2.0284e-07	1.24297e-05	1.2102e-06
H20	0.000670319	0.0293052	0.00724955	0.000154163	0.00544108	0.000163885	0.0265702	4.40515e-05	0.467737	1.86891e-05	0.000303563	0.000223702	0.000114544	0.000300436	0.000650079	5.15325e-05	6.02413e-06	0.00357449	1.95662e-05	0.38061	8.51713e-05	1.96675e-05	1.2714e-06	6.35511e-07	1.47512e-05	4.63622e-06	6.79158e-06
H21	0.000903353	0.00406922	0.0265328	0.0143198	0.000414731	0.000144797	0.00201233	3.25202e-05	0.00342628	3.20915e-05	0.45106	0.0169935	0.00519536	0.000187726	5.94318e-05	6.88218e-06	1.34539e-05	6.54683e-05	3.54161e-06	8.51713e-05	0.354487	0.0135661	1.43665e-06	1.67541e-06	0.00471461	0.00267378	0.000334034
H22	4.64589e-05	0.00903819	0.0278675	0.00030773	4.08402e-05	9.18866e-06	0.000414865	1.16256e-06	0.000471895	1.19395e-06	0.463325	0.0195636	0.0102532	6.40284e-05	1.44416e-05	2.05808e-06	1.65763e-05	2.02785e-05	5.78446e-07	1.96675e-05	0.0135661	0.398041	8.03033e-08	7.10196e-08	0.00107809	0.00041125	0.000781654
H23	0.00161065	4.55698e-06	2.25615e-06	0.000446221	0.00018811	0.00606861	2.04502e-05	0.0299128	1.64595e-05	0.480439	7.66433e-07	1.1126e-06	6.39297e-06	5.43963e-05	0.000153907	0.00300647	0.000443213	3.87879e-06	0.00671495	1.2714e-06	1.43665e-06	8.03033e-08	0.407583	0.016556	2.70195e-07	8.18318e-06	5.34049e-07
H24	0.000895364	1.99857e-06	1.94645e-06	0.000471277	8.28076e-05	0.00633503	8.61873e-06	0.029906	1.60077e-05	0.482832	7.86496e-07	2.42031e-06	1.226e-05	2.14806e-05	9.70153e-05	0.000462425	0.000802823	1.83185e-06	0.00368213	6.35511e-07	1.67541e-06	7.10196e-08	0.016556	0.40515	5.47511e-07	2.04123e-05	1.18833e-06
H25	5.00609e-05	0.000606541	0.00869603	0.000550136	2.80203e-05	4.36792e-05	6.83814e-05	6.01094e-06	0.000160663	3.59495e-06	0.0201158	0.473496	0.0292026	5.32891e-05	2.99778e-06	2.49778e-06	0.000108815	5.18854e-06	2.0284e-07	1.47512e-05	0.00471461	0.00107809	2.70195e-07	5.47511e-07	0.415914	0.00592547	0.00373297
H26	0.00173912	0.00040932	0.00102946	0.0260624	0.00084195	0.0028404	6.39268e-05	0.000243848	3.60637e-05	0.000161916	0.00532152	0.0277527	0.459894	0.00148985	7.16654e-05	0.000124264	0.00486423	2.84643e-05	1.24297e-05	4.63622e-06	0.00267378	0.00041125	8.18318e-06	2.04123e-05	0.00592547	0.35891	0.0155124
H27	0.000106776	0.000267481	0.00159268	0.000929139	2.63652e-05	0.000110749	6.52433e-06	1.09799e-05	1.37953e-05	1.0314e-05	0.00636104	0.0311884	0.486143	0.000105827	2.21029e-06	6.2673e-06	0.000366235	1.49584e-06	1.2102e-06	6.79158e-06	0.000334034	0.000781654	5.34049e-07	1.18833e-06	0.00373297	0.0155124	0.421677
LDM — ajoene_z_5_LIDI_matrix
	S1	S2	S3	O4	C5	C6	C7	C8	C9	C10	C11	C12	C13	H14	H15	H16	H17	H18	H19	H20	H21	H22	H23	H24	H25	H26	H27
S1	12.9226	0.00295775	0.000373526	0.685299	0.463008	0.463837	0.0281605	0.0296765	0.0149535	0.0196616	9.96229e-05	0.000414413	0.000944822	0.0226055	0.0187747	0.022505	0.0229779	0.00275798	0.00117141	0.000962875	2.05724e-05	3.24343e-05	0.000908864	0.00123436	1.87428e-05	0.000311905	0.000299182		92.242	31.7591
S2	0.00295775	14.5149	0.653236	0.00144839	0.0149941	0.00080592	0.0635874	0.00743804	0.573132	0.000717711	0.0384908	0.00798165	0.00389115	0.00165253	0.0156956	0.000194977	0.000624047	0.00894935	0.0202221	0.0271751	0.0068566	0.00844942	0.000144355	0.000318621	0.000550364	0.000394919	0.000170966
S3	0.000373526	0.653236	14.624	0.000357674	0.00189527	0.000187302	0.00969469	0.000415432	0.0403369	4.88148e-05	0.529806	0.0392461	0.0191408	0.000202223	0.00168472	1.67099e-05	0.000269209	0.00135293	0.0010274	0.0136272	0.0287657	0.0273917	2.06541e-05	2.05731e-05	0.00755808	0.00115716	0.00150028
O4	0.685299	0.00144839	0.000357674	8.36841	0.062266	0.0629077	0.0143123	0.0102036	0.00287016	0.00644812	2.58898e-05	9.07261e-05	0.000192362	0.00396946	0.0081059	0.00442096	0.00632261	0.013462	0.000460722	0.000245612	9.59548e-06	1.08285e-05	0.000528171	0.000418984	6.08195e-06	0.000121103	8.65147e-05
C5	0.463008	0.0149941	0.00189527	0.062266	4.07159	0.0232813	0.518274	0.00712512	0.0351467	0.00203021	0.00011749	9.57213e-05	0.000140206	0.463124	0.458495	0.00498413	0.00259337	0.0176283	0.00306851	0.00548967	2.76898e-05	4.27097e-05	6.83912e-05	0.000144651	2.51402e-05	2.05036e-05	1.83297e-05
C6	0.463837	0.00080592	0.000187302	0.0629077	0.0232813	4.07387	0.00880309	0.518804	0.00348126	0.0373299	8.52794e-05	0.00129985	0.00509867	0.00498263	0.00160777	0.464965	0.452032	0.000321508	0.0183321	0.000119742	5.03027e-05	3.07554e-05	0.00638264	0.00612019	4.72803e-05	0.00154956	0.00116025
C7	0.0281605	0.0635874	0.00969469	0.0143123	0.518274	0.00880309	3.95927	0.00104698	0.879967	0.000379579	0.00167742	0.00135419	0.00197198	0.0194047	0.0169164	0.000862212	0.00993448	0.460422	0.00101627	0.0247812	0.000184195	0.000498798	3.2495e-05	5.29978e-05	7.64598e-05	6.87357e-05	7.59862e-05
C8	0.0296765	0.00743804	0.000415432	0.0102036	0.00712512	0.518804	0.00104698	3.98148	0.000909232	0.914331	0.000245821	0.00110872	0.0062971	0.000707	0.00779396	0.0182459	0.0171351	0.000108071	0.45942	3.62594e-05	0.00041554	3.05621e-05	0.0300112	0.0299722	0.00017722	0.010086	0.000275366
C9	0.0149535	0.573132	0.0403369	0.00287016	0.0351467	0.00348126	0.879967	0.000909232	4.10127	0.000157331	0.00206205	0.00720753	0.00493232	0.00981514	0.00361436	0.000271971	0.00553267	0.0282721	0.00173694	0.463523	0.000275835	0.000436191	3.14656e-05	5.82364e-05	0.000778861	0.000129406	0.000158142
C10	0.0196616	0.000717711	4.88148e-05	0.00644812	0.00203021	0.0373299	0.000379579	0.914331	0.000157331	4.08551	5.37891e-05	0.000247669	0.00158962	0.000129211	0.00230972	0.00687408	0.00702743	7.03475e-05	0.0277705	9.22764e-06	0.00010381	4.99828e-06	0.483593	0.481116	8.67372e-05	0.00399819	0.00013085
C11	9.96229e-05	0.0384908	0.529806	2.58898e-05	0.00011749	8.52794e-05	0.00167742	0.000245821	0.00206205	5.37891e-05	4.01489	0.516476	0.0367336	4.22382e-05	7.52781e-05	9.19082e-06	0.000156918	0.000101486	0.000713863	0.000371805	0.462967	0.462134	1.07922e-05	8.5859e-06	0.0198451	0.00606702	0.00626519
C12	0.000414413	0.00798165	0.0392461	9.07261e-05	9.57213e-05	0.00129985	0.00135419	0.00110872	0.00720753	0.000247669	0.516476	3.97069	0.913568	3.63196e-05	1.25925e-05	4.37923e-05	0.00280657	5.8959e-05	0.000984529	0.00215793	0.0182438	0.0194962	1.53666e-05	2.2855e-05	0.472043	0.0290618	0.0299956
C13	0.000944822	0.00389115	0.0191408	0.000192362	0.000140206	0.00509867	0.00197198	0.0062971	0.00493232	0.00158962	0.0367336	0.913568	4.07513	6.56183e-05	1.97071e-05	0.000207248	0.00872498	6.51423e-05	0.00297406	0.000678269	0.00614778	0.0101748	5.3946e-05	8.58036e-05	0.0287983	0.472705	0.481515
H14	0.0226055	0.00165253	0.000202223	0.00396946	0.463124	0.00498263	0.0194047	0.000707	0.00981514	0.000129211	4.22382e-05	3.63196e-05	6.56183e-05	0.387816	0.0144821	0.000939291	0.000189401	0.00092926	0.000291445	0.000679243	4.96571e-06	1.52247e-05	7.22466e-06	1.74398e-05	1.27111e-06	7.00913e-06	5.08776e-06
H15	0.0187747	0.0156956	0.00168472	0.0081059	0.458495	0.00160777	0.0169164	0.00779396	0.00361436	0.00230972	7.52781e-05	1.25925e-05	1.97071e-05	0.0144821	0.384951	0.000194996	0.000112793	0.00467176	0.00456249	0.000227084	2.61762e-05	2.59024e-05	7.87522e-05	0.000121233	3.36195e-06	1.6321e-05	2.62641e-06
H16	0.022505	0.000194977	1.67099e-05	0.00442096	0.00498413	0.464965	0.000862212	0.0182459	0.000271971	0.00687408	9.19082e-06	4.37923e-05	0.000207248	0.000939291	0.000194996	0.394696	0.0140651	2.54705e-05	0.0042511	9.27925e-06	1.16986e-05	1.29118e-06	0.000463212	0.00330721	1.7193e-06	5.46616e-05	6.937e-05
H17	0.0229779	0.000624047	0.000269209	0.00632261	0.00259337	0.452032	0.00993448	0.0171351	0.00553267	0.00702743	0.000156918	0.00280657	0.00872498	0.000189401	0.000112793	0.0140651	0.366811	0.00071708	0.00186727	0.000138306	1.58102e-05	7.00362e-05	0.00078624	0.000437718	8.08148e-05	0.000846415	0.00233465
H18	0.00275798	0.00894935	0.00135293	0.013462	0.0176283	0.000321508	0.460422	0.000108071	0.0282721	7.03475e-05	0.000101486	5.8959e-05	6.51423e-05	0.00092926	0.00467176	2.54705e-05	0.00071708	0.369335	5.22215e-05	0.00349398	9.63868e-06	3.61548e-05	4.48038e-06	3.43529e-06	1.45356e-05	2.64114e-06	4.48843e-06
H19	0.00117141	0.0202221	0.0010274	0.000460722	0.00306851	0.0183321	0.00101627	0.45942	0.00173694	0.0277705	0.000713863	0.000984529	0.00297406	0.000291445	0.00456249	0.0042511	0.00186727	5.22215e-05	0.384964	0.000100722	0.000835972	4.60081e-05	0.00353657	0.00627669	7.36333e-05	0.00289099	0.000148888
H20	0.000962875	0.0271751	0.0136272	0.000245612	0.00548967	0.000119742	0.0247812	3.62594e-05	0.463523	9.22764e-06	0.000371805	0.00215793	0.000678269	0.000679243	0.000227084	9.27925e-06	0.000138306	0.00349398	0.000100722	0.370729	0.000180617	2.79017e-05	2.53301e-06	2.60489e-06	0.000954515	3.27206e-05	2.65661e-05
H21	2.05724e-05	0.0068566	0.0287657	9.59548e-06	2.76898e-05	5.03027e-05	0.000184195	0.00041554	0.000275835	0.00010381	0.462967	0.0182438	0.00614778	4.96571e-06	2.61762e-05	1.16986e-05	1.58102e-05	9.63868e-06	0.000835972	0.000180617	0.392321	0.014375	1.73713e-05	1.37571e-05	0.00517809	0.0039635	0.000445696
H22	3.24343e-05	0.00844942	0.0273917	1.08285e-05	4.27097e-05	3.07554e-05	0.000498798	3.05621e-05	0.000436191	4.99828e-06	0.462134	0.0194962	0.0101748	1.52247e-05	2.59024e-05	1.29118e-06	7.00362e-05	3.61548e-05	4.60081e-05	2.79017e-05	0.014375	0.393352	6.72029e-07	4.68103e-07	0.00115724	0.000465166	0.000760851
H23	0.000908864	0.000144355	2.06541e-05	0.000528171	6.83912e-05	0.00638264	3.2495e-05	0.0300112	3.14656e-05	0.483593	1.07922e-05	1.53666e-05	5.3946e-05	7.22466e-06	7.87522e-05	0.000463212	0.00078624	4.48038e-06	0.00353657	2.53301e-06	1.73713e-05	6.72029e-07	0.40857	0.0167966	4.06919e-06	0.000128977	6.73799e-06
H24	0.00123436	0.000318621	2.05731e-05	0.000418984	0.000144651	0.00612019	5.29978e-05	0.0299722	5.82364e-05	0.481116	8.5859e-06	2.2855e-05	8.58036e-05	1.74398e-05	0.000121233	0.00330721	0.000437718	3.43529e-06	0.00627669	2.60489e-06	1.37571e-05	4.68103e-07	0.0167966	0.41078	3.45806e-06	0.000126193	5.40071e-06
H25	1.87428e-05	0.000550364	0.00755808	6.08195e-06	2.51402e-05	4.72803e-05	7.64598e-05	0.00017722	0.000778861	8.67372e-05	0.0198451	0.472043	0.0287983	1.27111e-06	3.36195e-06	1.7193e-06	8.08148e-05	1.45356e-05	7.36333e-05	0.000954515	0.00517809	0.00115724	4.06919e-06	3.45806e-06	0.410162	0.00647178	0.00366946
H26	0.000311905	0.000394919	0.00115716	0.000121103	2.05036e-05	0.00154956	6.87357e-05	0.010086	0.000129406	0.00399819	0.00606702	0.0290618	0.472705	7.00913e-06	1.6321e-05	5.46616e-05	0.000846415	2.64114e-06	0.00289099	3.27206e-05	0.0039635	0.000465166	0.000128977	0.000126193	0.00647178	0.396824	0.0163158
H27	0.000299182	0.000170966	0.00150028	8.65147e-05	1.83297e-05	0.00116025	7.59862e-05	0.000275366	0.000158142	0.00013085	0.00626519	0.0299956	0.481515	5.08776e-06	2.62641e-06	6.937e-05	0.00233465	4.48843e-06	0.000148888	2.65661e-05	0.000445696	0.000760851	6.73799e-06	5.40071e-06	0.00366946	0.0163158	0.407046
LDM — ajoene_z_6_LIDI_matrix
	S1	S2	S3	O4	C5	C6	C7	C8	C9	C10	C11	C12	C13	H14	H15	H16	H17	H18	H19	H20	H21	H22	H23	H24	H25	H26	H27
S1	12.9353	0.0033188	0.000913205	0.67839	0.466449	0.466321	0.0301086	0.0308999	0.012399	0.0167587	0.00048102	0.00010752	0.000979099	0.0208323	0.0219473	0.0243498	0.0202175	0.00668222	0.00197788	0.00066254	4.98436e-05	0.000951261	0.000734595	0.000971566	5.06952e-05	0.00176916	0.000105227		92.274	31.7245
S2	0.0033188	14.5372	0.643187	0.00109221	0.018317	0.000229979	0.0543959	6.81973e-05	0.573309	5.55489e-05	0.0378918	0.0140359	0.00852906	0.00141345	0.023244	9.06646e-05	2.40833e-05	0.00899531	2.98777e-06	0.0292809	0.00903041	0.00399177	2.49556e-06	4.86012e-06	0.000613105	0.000415303	0.000270438
S3	0.000913205	0.643187	14.6424	0.00113025	0.00187544	0.000134575	0.0193702	2.9129e-05	0.0463187	3.75953e-05	0.529362	0.0406158	0.0198089	0.00065229	0.00133495	5.66828e-05	1.45692e-05	0.00160025	3.20023e-06	0.00691596	0.0278416	0.0264522	1.5162e-06	3.08423e-06	0.00865908	0.00102764	0.00158784
O4	0.67839	0.00109221	0.00113025	8.33072	0.0612282	0.0604216	0.0110032	0.0105466	0.00424409	0.00283646	0.00661868	0.00123444	0.0121926	0.00855606	0.00423146	0.00445625	0.00843238	0.00100278	0.00732224	0.000147997	0.000320992	0.0151863	0.000409854	0.000186657	0.000557018	0.0260673	0.000940989
C5	0.466449	0.018317	0.00187544	0.0612282	4.07558	0.0260658	0.518083	0.00472485	0.034302	0.00198778	0.000375722	0.000407222	0.00139858	0.463701	0.448858	0.00579998	0.00349591	0.0191929	0.000218887	0.00544099	4.38424e-05	0.000463327	0.000106373	0.000230251	3.18471e-05	0.00100067	3.06115e-05
C6	0.466321	0.000229979	0.000134575	0.0604216	0.0260658	4.06476	0.00488709	0.516976	0.00164556	0.038438	6.58693e-05	0.000207041	0.00138566	0.00408318	0.00469585	0.457642	0.465469	0.000480975	0.0189499	0.000165104	9.32806e-06	0.000163944	0.0064001	0.00640738	4.2858e-05	0.0027739	0.000102639
C7	0.0301086	0.0543959	0.0193702	0.0110032	0.518083	0.00488709	3.9599	0.00109926	0.883827	0.000497172	0.00169291	0.000231341	0.000256485	0.0194041	0.0165688	0.00049262	0.000353341	0.469291	3.50961e-05	0.0266133	0.000422718	0.00198174	2.49735e-05	6.5999e-05	6.7785e-05	7.15899e-05	6.76364e-06
C8	0.0308999	6.81973e-05	2.9129e-05	0.0105466	0.00472485	0.516976	0.00109926	3.98217	0.000438609	0.923559	9.07222e-06	2.27671e-05	0.000145311	0.000449085	0.00040688	0.0184692	0.0178473	3.39412e-05	0.468604	5.13106e-05	2.06056e-06	1.32492e-05	0.0306881	0.0300836	5.55977e-06	0.000419236	1.5131e-05
C9	0.012399	0.573309	0.0463187	0.00424409	0.034302	0.00164556	0.883827	0.000438609	4.08163	0.000436906	0.00376651	0.000702749	0.000276917	0.0103811	0.00401173	6.83917e-05	0.000184845	0.0291464	1.39789e-05	0.467833	0.00047251	0.00327429	1.69061e-05	3.84313e-05	0.000158168	3.55986e-05	1.37997e-05
C10	0.0167587	5.55489e-05	3.75953e-05	0.00283646	0.00198778	0.038438	0.000497172	0.923559	0.000436906	4.07901	5.40992e-06	1.95872e-05	0.00010151	6.87952e-05	0.000222894	0.00949124	0.00641119	4.99936e-05	0.0281	3.01748e-05	9.28633e-07	6.36997e-06	0.481657	0.482909	3.6158e-06	0.000137624	8.42411e-06
C11	0.00048102	0.0378918	0.529362	0.00661868	0.000375722	6.58693e-05	0.00169291	9.07222e-06	0.00376651	5.40992e-06	4.02884	0.516036	0.036623	4.8474e-05	0.000425594	5.08551e-05	1.33337e-05	9.83596e-05	6.24449e-06	0.00030369	0.463355	0.450576	4.08359e-07	3.99357e-07	0.0200992	0.00530199	0.0063474
C12	0.00010752	0.0140359	0.0406158	0.00123444	0.000407222	0.000207041	0.000231341	2.27671e-05	0.000702749	1.95872e-05	0.516036	3.97114	0.918153	4.24051e-05	0.00166917	0.000790595	1.69498e-05	2.61396e-05	5.94194e-05	0.000225293	0.0195624	0.0169358	1.24376e-06	1.55389e-06	0.473442	0.0277956	0.0311001
C13	0.000979099	0.00852906	0.0198089	0.0121926	0.00139858	0.00138566	0.000256485	0.000145311	0.000276917	0.00010151	0.036623	0.918153	4.10403	0.000108356	0.00406921	0.00387761	9.75848e-05	6.89963e-05	0.000242374	0.000116742	0.0102076	0.00514296	8.46985e-06	8.31971e-06	0.0291863	0.460153	0.486062
H14	0.0208323	0.00141345	0.00065229	0.00855606	0.463701	0.00408318	0.0194041	0.000449085	0.0103811	6.87952e-05	4.8474e-05	4.24051e-05	0.000108356	0.396638	0.0137796	0.000296043	0.00322287	0.000897597	0.000122983	0.000684047	1.57707e-05	6.45525e-05	1.52954e-05	7.61497e-06	3.42567e-06	8.20309e-05	2.46521e-06
H15	0.0219473	0.023244	0.00133495	0.00423146	0.448858	0.00469585	0.0165688	0.00040688	0.00401173	0.000222894	0.000425594	0.00166917	0.00406921	0.0137796	0.358558	0.0042395	0.000198578	0.00470021	1.16006e-05	0.000301609	6.98421e-05	0.000230349	1.11757e-05	2.50199e-05	5.98514e-05	0.00178779	0.000120948
H16	0.0243498	9.06646e-05	5.66828e-05	0.00445625	0.00579998	0.457642	0.00049262	0.0184692	6.83917e-05	0.00949124	5.08551e-05	0.000790595	0.00387761	0.000296043	0.0042395	0.383352	0.0143937	0.000191592	0.00121091	8.58233e-06	1.66735e-05	1.41576e-05	0.000466255	0.000744128	9.93354e-05	0.00442256	0.000328288
H17	0.0202175	2.40833e-05	1.45692e-05	0.00843238	0.00349591	0.465469	0.000353341	0.0178473	0.000184845	0.00641119	1.33337e-05	1.69498e-05	9.75848e-05	0.00322287	0.000198578	0.0143937	0.40162	1.41427e-05	0.00498993	2.11157e-05	9.50497e-07	2.93402e-05	0.00410089	0.000471623	5.39686e-06	0.000219718	6.58339e-06
H18	0.00668222	0.00899531	0.00160025	0.00100278	0.0191929	0.000480975	0.469291	3.39412e-05	0.0291464	4.99936e-05	9.83596e-05	2.61396e-05	6.89963e-05	0.000897597	0.00470021	0.000191592	1.41427e-05	0.400914	1.56237e-06	0.00356404	2.07041e-05	6.47359e-05	1.9003e-06	2.48655e-06	5.19222e-06	3.26953e-05	1.64405e-06
H19	0.00197788	2.98777e-06	3.20023e-06	0.00732224	0.000218887	0.0189499	3.50961e-05	0.468604	1.39789e-05	0.0281	6.24449e-06	5.94194e-05	0.000242374	0.000122983	1.16006e-05	0.00121091	0.00498993	1.56237e-06	0.389477	1.26136e-06	1.33713e-06	6.42438e-06	0.0065466	0.00354866	1.50632e-05	0.000440494	1.36454e-05
H20	0.00066254	0.0292809	0.00691596	0.000147997	0.00544099	0.000165104	0.0266133	5.13106e-05	0.467833	3.01748e-05	0.00030369	0.000225293	0.000116742	0.000684047	0.000301609	8.58233e-06	2.11157e-05	0.00356404	1.26136e-06	0.380604	2.02618e-05	7.98289e-05	1.55047e-06	3.64516e-06	1.43429e-05	4.70073e-06	6.73946e-06
H21	4.98436e-05	0.00903041	0.0278416	0.000320992	4.38424e-05	9.32806e-06	0.000422718	2.06056e-06	0.00047251	9.28633e-07	0.463355	0.0195624	0.0102076	1.57707e-05	6.98421e-05	1.66735e-05	9.50497e-07	2.07041e-05	1.33713e-06	2.02618e-05	0.397863	0.0135367	4.13571e-08	1.35525e-07	0.00108939	0.000412343	0.000780741
H22	0.000951261	0.00399177	0.0264522	0.0151863	0.000463327	0.000163944	0.00198174	1.32492e-05	0.00327429	6.36997e-06	0.450576	0.0169358	0.00514296	6.45525e-05	0.000230349	1.41576e-05	2.93402e-05	6.47359e-05	6.42438e-06	7.98289e-05	0.0135367	0.353448	7.05948e-07	6.04065e-07	0.00470245	0.00263998	0.000328881
H23	0.000734595	2.49556e-06	1.5162e-06	0.000409854	0.000106373	0.0064001	2.49735e-05	0.0306881	1.69061e-05	0.481657	4.08359e-07	1.24376e-06	8.46985e-06	1.52954e-05	1.11757e-05	0.000466255	0.00410089	1.9003e-06	0.0065466	1.55047e-06	4.13571e-08	7.05948e-07	0.415476	0.0168121	4.10045e-07	2.4756e-05	7.81843e-07
H24	0.000971566	4.86012e-06	3.08423e-06	0.000186657	0.000230251	0.00640738	6.5999e-05	0.0300836	3.84313e-05	0.482909	3.99357e-07	1.55389e-06	8.31971e-06	7.61497e-06	2.50199e-05	0.000744128	0.000471623	2.48655e-06	0.00354866	3.64516e-06	1.35525e-07	6.04065e-07	0.0168121	0.40616	3.15158e-07	1.17008e-05	8.95281e-07
H25	5.06952e-05	0.000613105	0.00865908	0.000557018	3.18471e-05	4.2858e-05	6.7785e-05	5.55977e-06	0.000158168	3.6158e-06	0.0200992	0.473442	0.0291863	3.42567e-06	5.98514e-05	9.93354e-05	5.39686e-06	5.19222e-06	1.50632e-05	1.43429e-05	0.00108939	0.00470245	4.10045e-07	3.15158e-07	0.415583	0.00593289	0.00372309
H26	0.00176916	0.000415303	0.00102764	0.0260673	0.00100067	0.0027739	7.15899e-05	0.000419236	3.55986e-05	0.000137624	0.00530199	0.0277956	0.460153	8.20309e-05	0.00178779	0.00442256	0.000219718	3.26953e-05	0.000440494	4.70073e-06	0.000412343	0.00263998	2.4756e-05	1.17008e-05	0.00593289	0.360674	0.0155234
H27	0.000105227	0.000270438	0.00158784	0.000940989	3.06115e-05	0.000102639	6.76364e-06	1.5131e-05	1.37997e-05	8.42411e-06	0.0063474	0.0311001	0.486062	2.46521e-06	0.000120948	0.000328288	6.58339e-06	1.64405e-06	1.36454e-05	6.73946e-06	0.000780741	0.000328881	7.81843e-07	8.95281e-07	0.00372309	0.0155234	0.420875
LDM — ajoene_z_7_LIDI_matrix
	S1	S2	S3	O4	C5	C6	C7	C8	C9	C10	C11	C12	C13	H14	H15	H16	H17	H18	H19	H20	H21	H22	H23	H24	H25	H26	H27
S1	12.9411	0.00329427	0.000932007	0.680259	0.465341	0.462613	0.0296834	0.0302073	0.0128339	0.0183197	0.000543905	0.000108832	0.000951818	0.0208032	0.0220441	0.0237488	0.0207299	0.00617163	0.00266705	0.000673086	0.00104908	5.33981e-05	0.000993455	0.000853699	5.0374e-05	0.00168838	0.000100552		92.2575	31.7425
S2	0.00329427	14.5384	0.643372	0.00119742	0.0183004	0.000238838	0.0544837	7.25596e-05	0.573224	7.40547e-05	0.0379498	0.0136896	0.00804393	0.00141288	0.0236486	9.34971e-05	2.99368e-05	0.00900698	7.99022e-06	0.0292773	0.0040209	0.00904562	4.58076e-06	8.10294e-06	0.00061944	0.000370973	0.000261988
S3	0.000932007	0.643372	14.6425	0.00117759	0.00188214	0.000137776	0.019165	3.20085e-05	0.0461638	5.62873e-05	0.529944	0.0404952	0.0193645	0.000630613	0.00137902	6.95602e-05	1.53153e-05	0.00159562	2.06519e-06	0.00708749	0.026303	0.0279263	3.10852e-06	1.52069e-05	0.00886388	0.000998878	0.00159491
O4	0.680259	0.00119742	0.00117759	8.32191	0.0612373	0.0608441	0.0119026	0.0119771	0.00458427	0.00951483	0.0072256	0.00128967	0.012227	0.00856634	0.00407218	0.00452666	0.00837658	0.00103021	0.000452237	0.00015129	0.0164351	0.000345878	0.000328233	0.00158416	0.000552311	0.0258713	0.000967775
C5	0.465341	0.0183004	0.00188214	0.0612373	4.0724	0.0262889	0.518307	0.00480216	0.0342971	0.00226054	0.00036419	0.00034286	0.0011521	0.464049	0.449365	0.00533189	0.00424406	0.0191819	0.00030936	0.00543111	0.00041894	4.10777e-05	0.000200848	0.000132505	2.52014e-05	0.000691622	2.43524e-05
C6	0.462613	0.000238838	0.000137776	0.0608441	0.0262889	4.06277	0.00477277	0.519076	0.00159833	0.037736	6.88126e-05	0.000277911	0.00170968	0.00388581	0.00525354	0.457135	0.466832	0.000459811	0.0201506	0.000159289	0.000160288	1.1619e-05	0.00632649	0.00595956	4.85922e-05	0.00293183	0.000118489
C7	0.0296834	0.0544837	0.019165	0.0119026	0.518307	0.00477277	3.95781	0.00113317	0.883336	0.000595238	0.00165338	0.00022564	0.00023242	0.0193948	0.0166769	0.000427538	0.000455966	0.469459	4.17488e-05	0.0265635	0.00185971	0.000417569	6.04327e-05	3.05326e-05	6.61228e-05	5.32012e-05	6.19551e-06
C8	0.0302073	7.25596e-05	3.20085e-05	0.0119771	0.00480216	0.519076	0.00113317	3.97724	0.000471679	0.917412	1.16885e-05	2.19932e-05	0.000198897	0.000414705	0.000458916	0.0177485	0.0185226	3.90082e-05	0.47514	5.08674e-05	1.77984e-05	2.60421e-06	0.0299948	0.0295279	5.62527e-06	0.000393192	4.75159e-05
C9	0.0128339	0.573224	0.0461638	0.00458427	0.0342971	0.00159833	0.883336	0.000471679	4.08164	0.000594635	0.00373232	0.000692855	0.000262783	0.0101696	0.00402277	6.40213e-05	0.000196632	0.0291704	1.87449e-05	0.467757	0.00320693	0.00046521	3.57202e-05	2.52861e-05	0.000158688	3.07338e-05	1.35502e-05
C10	0.0183197	7.40547e-05	5.62873e-05	0.00951483	0.00226054	0.037736	0.000595238	0.917412	0.000594635	4.06564	1.26022e-05	0.000108418	0.000971604	0.00018734	8.87171e-05	0.00638931	0.00784946	4.77955e-05	0.0296417	3.52551e-05	1.42895e-05	3.30472e-06	0.482823	0.476854	2.41962e-05	0.00192195	0.000251019
C11	0.000543905	0.0379498	0.529944	0.0072256	0.00036419	6.88126e-05	0.00165338	1.16885e-05	0.00373232	1.26022e-05	4.03035	0.515978	0.0366761	4.66461e-05	0.000394156	6.40391e-05	1.36969e-05	9.85803e-05	1.16122e-06	0.000302598	0.449577	0.463178	6.48206e-07	3.83532e-05	0.0200884	0.00525274	0.00635119
C12	0.000108832	0.0136896	0.0404952	0.00128967	0.00034286	0.000277911	0.00022564	2.19932e-05	0.000692855	0.000108418	0.515978	3.97096	0.91834	3.72602e-05	0.00145186	0.000981521	2.26695e-05	2.41103e-05	1.12485e-05	0.000222367	0.0168711	0.0196396	9.65631e-06	0.00057463	0.47336	0.0274793	0.0311984
C13	0.000951818	0.00804393	0.0193645	0.012227	0.0011521	0.00170968	0.00023242	0.000198897	0.000262783	0.000971604	0.0366761	0.91834	4.10594	9.62128e-05	0.00332555	0.00462048	0.000113041	5.89717e-05	0.000123776	0.000110888	0.00509144	0.0103507	8.97367e-05	0.0030257	0.0291906	0.458073	0.485978
H14	0.0208032	0.00141288	0.000630613	0.00856634	0.464049	0.00388581	0.0193948	0.000414705	0.0101696	0.00018734	4.66461e-05	3.72602e-05	9.62128e-05	0.397566	0.0138634	0.000243798	0.0035571	0.000958877	1.2002e-05	0.000686378	5.99214e-05	1.47368e-05	2.80685e-05	9.7325e-06	2.91423e-06	6.12705e-05	2.10573e-06
H15	0.0220441	0.0236486	0.00137902	0.00407218	0.449365	0.00525354	0.0166769	0.000458916	0.00402277	8.87171e-05	0.000394156	0.00145186	0.00332555	0.0138634	0.360263	0.00431608	0.00026697	0.00474306	0.000142921	0.000304235	0.000188403	6.14085e-05	7.09761e-06	1.79808e-05	4.72318e-05	0.00122687	9.666e-05
H16	0.0237488	9.34971e-05	6.95602e-05	0.00452666	0.00533189	0.457135	0.000427538	0.0177485	6.40213e-05	0.00638931	6.40391e-05	0.000981521	0.00462048	0.000243798	0.00431608	0.382394	0.0144994	0.000182505	0.00453442	6.15021e-06	1.57026e-05	2.44396e-05	0.000417462	0.00324315	0.000105833	0.00490982	0.000388118
H17	0.0207299	2.99368e-05	1.53153e-05	0.00837658	0.00424406	0.466832	0.000455966	0.0185226	0.000196632	0.00784946	1.36969e-05	2.26695e-05	0.000113041	0.0035571	0.00026697	0.0144994	0.402838	1.75073e-05	0.00198299	2.60544e-05	2.81795e-05	1.05768e-06	0.000814816	0.000457727	5.63822e-06	0.000219604	7.74231e-06
H18	0.00617163	0.00900698	0.00159562	0.00103021	0.0191819	0.000459811	0.469459	3.90082e-05	0.0291704	4.77955e-05	9.85803e-05	2.41103e-05	5.89717e-05	0.000958877	0.00474306	0.000182505	1.75073e-05	0.401498	6.56647e-06	0.00356467	6.29173e-05	2.05593e-05	2.57126e-06	2.47488e-06	5.29877e-06	2.36846e-05	1.33599e-06
H19	0.00266705	7.99022e-06	2.06519e-06	0.000452237	0.00030936	0.0201506	4.17488e-05	0.47514	1.87449e-05	0.0296417	1.16122e-06	1.12485e-05	0.000123776	1.2002e-05	0.000142921	0.00453442	0.00198299	6.56647e-06	0.413376	1.42726e-06	9.62418e-07	2.19653e-07	0.00366447	0.00657751	2.73444e-06	0.000130547	3.27703e-05
H20	0.000673086	0.0292773	0.00708749	0.00015129	0.00543111	0.000159289	0.0265635	5.08674e-05	0.467757	3.52551e-05	0.000302598	0.000222367	0.000110888	0.000686378	0.000304235	6.15021e-06	2.60544e-05	0.00356467	1.42726e-06	0.380554	7.95929e-05	1.99357e-05	3.54402e-06	1.87639e-06	1.48867e-05	4.36027e-06	6.72325e-06
H21	0.00104908	0.0040209	0.026303	0.0164351	0.00041894	0.000160288	0.00185971	1.77984e-05	0.00320693	1.42895e-05	0.449577	0.0168711	0.00509144	5.99214e-05	0.000188403	1.57026e-05	2.81795e-05	6.29173e-05	9.62418e-07	7.95929e-05	0.35028	0.0134475	7.42693e-07	7.0584e-06	0.00466359	0.00255576	0.000325383
H22	5.33981e-05	0.00904562	0.0279263	0.000345878	4.10777e-05	1.1619e-05	0.000417569	2.60421e-06	0.00046521	3.30472e-06	0.463178	0.0196396	0.0103507	1.47368e-05	6.14085e-05	2.44396e-05	1.05768e-06	2.05593e-05	2.19653e-07	1.99357e-05	0.0134475	0.397782	1.70239e-07	1.43312e-05	0.00104524	0.000407584	0.000777269
H23	0.000993455	4.58076e-06	3.10852e-06	0.000328233	0.000200848	0.00632649	6.04327e-05	0.0299948	3.57202e-05	0.482823	6.48206e-07	9.65631e-06	8.97367e-05	2.80685e-05	7.09761e-06	0.000417462	0.000814816	2.57126e-06	0.00366447	3.54402e-06	7.42693e-07	1.70239e-07	0.407185	0.0162202	1.95088e-06	0.000162678	3.06943e-05
H24	0.000853699	8.10294e-06	1.52069e-05	0.00158416	0.000132505	0.00595956	3.05326e-05	0.0295279	2.52861e-05	0.476854	3.83532e-05	0.00057463	0.0030257	9.7325e-06	1.79808e-05	0.00324315	0.000457727	2.47488e-06	0.00657751	1.87639e-06	7.0584e-06	1.43312e-05	0.0162202	0.400707	7.37602e-05	0.00306999	0.000639014
H25	5.0374e-05	0.00061944	0.00886388	0.000552311	2.52014e-05	4.85922e-05	6.61228e-05	5.62527e-06	0.000158688	2.41962e-05	0.0200884	0.47336	0.0291906	2.91423e-06	4.72318e-05	0.000105833	5.63822e-06	5.29877e-06	2.73444e-06	1.48867e-05	0.00466359	0.00104524	1.95088e-06	7.37602e-05	0.415435	0.00586173	0.00373545
H26	0.00168838	0.000370973	0.000998878	0.0258713	0.000691622	0.00293183	5.32012e-05	0.000393192	3.07338e-05	0.00192195	0.00525274	0.0274793	0.458073	6.12705e-05	0.00122687	0.00490982	0.000219604	2.36846e-05	0.000130547	4.36027e-06	0.00255576	0.000407584	0.000162678	0.00306999	0.00586173	0.356762	0.0155546
H27	0.000100552	0.000261988	0.00159491	0.000967775	2.43524e-05	0.000118489	6.19551e-06	4.75159e-05	1.35502e-05	0.000251019	0.00635119	0.0311984	0.485978	2.10573e-06	9.666e-05	0.000388118	7.74231e-06	1.33599e-06	3.27703e-05	6.72325e-06	0.000325383	0.000777269	3.06943e-05	0.000639014	0.00373545	0.0155546	0.42209
LDM — ajoene_z_8_LIDI_matrix
	S1	S2	S3	O4	C5	C6	C7	C8	C9	C10	C11	C12	C13	H14	H15	H16	H17	H18	H19	H20	H21	H22	H23	H24	H25	H26	H27
S1	12.9455	0.00321332	0.00112326	0.681193	0.465251	0.465328	0.0292929	0.0276424	0.013601	0.0168106	0.00105544	0.000186683	7.58921e-05	0.0213915	0.0217397	0.0202091	0.0229318	0.00547257	0.00192803	0.000711561	0.0017872	7.41036e-05	0.00127023	0.000776883	0.000167996	6.02147e-06	9.71117e-06		92.2651	31.7341
S2	0.00321332	14.5526	0.642028	0.0012058	0.0182383	0.000256493	0.0526506	0.000608434	0.571474	0.00117693	0.0379781	0.00809827	0.00166254	0.0233753	0.00133317	2.8531e-05	7.19464e-05	0.00895111	4.02247e-05	0.0294658	0.00553707	0.00859492	7.65849e-05	2.66462e-05	0.0109277	0.000458935	0.000218826
S3	0.00112326	0.642028	14.6385	0.00196698	0.00181276	0.000140845	0.0203452	8.88922e-05	0.0461575	0.000141761	0.5313	0.0432781	0.0196342	0.00117445	0.00067098	1.59056e-05	3.77021e-05	0.00162992	0.000188877	0.0058123	0.0251564	0.0262085	3.6959e-05	6.54927e-06	0.00497391	0.000935271	0.0015701
O4	0.681193	0.0012058	0.00196698	8.33329	0.0611301	0.0608452	0.0143342	0.0138361	0.00539724	0.00298398	0.0130537	0.00128681	0.000585111	0.00328169	0.00840706	0.00841165	0.00346849	0.00127486	0.0103442	0.000169727	0.0286243	0.000516326	0.000260859	0.000459598	0.000107032	2.70877e-05	4.3231e-05
C5	0.465251	0.0182383	0.00181276	0.0611301	4.07931	0.0247104	0.518702	0.00819669	0.0341274	0.00485527	0.000624446	9.82355e-05	4.84237e-05	0.444724	0.464962	0.00397259	0.00479404	0.0191598	0.000197943	0.00541696	0.000983976	5.12775e-05	0.000158524	0.000321374	0.00017063	3.7449e-06	4.96125e-06
C6	0.465328	0.000256493	0.000140845	0.0608452	0.0247104	4.06706	0.00464071	0.517211	0.00167102	0.0375199	6.15236e-05	0.000387495	0.000237508	0.00392221	0.00281257	0.465976	0.464501	0.000334336	0.0179447	0.000163018	0.000136609	6.74625e-06	0.0063049	0.00621276	0.000192537	7.20966e-06	2.01103e-05
C7	0.0292929	0.0526506	0.0203452	0.0143342	0.518702	0.00464071	3.9521	0.000744729	0.882789	0.000478452	0.0015466	0.000180992	0.000224813	0.0161776	0.0194249	0.000465426	0.00100678	0.4693	2.29512e-05	0.0267037	0.00211576	0.000363915	1.47752e-05	4.50389e-05	8.85069e-05	1.56377e-05	1.64933e-05
C8	0.0276424	0.000608434	8.88922e-05	0.0138361	0.00819669	0.517211	0.000744729	3.97584	0.000144804	0.912482	0.000492555	0.00617694	0.00248468	0.011731	0.000449544	0.0177049	0.0189997	0.000254947	0.458709	1.55968e-05	0.000461868	3.56894e-05	0.029412	0.0304748	0.00424316	0.000101238	0.000113419
C9	0.013601	0.571474	0.0461575	0.00539724	0.0341274	0.00167102	0.882789	0.000144804	4.08074	0.000216826	0.00370832	0.000637775	0.000241905	0.00385378	0.00994144	0.000181797	0.000551419	0.0291861	1.27691e-05	0.468327	0.00330697	0.000395811	1.09534e-05	1.36994e-05	0.000359446	3.00394e-05	3.42001e-05
C10	0.0168106	0.00117693	0.000141761	0.00298398	0.00485527	0.0375199	0.000478452	0.912482	0.000216826	4.07802	0.000324492	0.00345294	0.000994136	0.00989379	0.000291507	0.00594506	0.00989515	0.000258561	0.0266134	3.53669e-05	0.000177599	7.62645e-05	0.479772	0.481606	0.00652286	9.01822e-05	0.000389442
C11	0.00105544	0.0379781	0.5313	0.0130537	0.000624446	6.15236e-05	0.0015466	0.000492555	0.00370832	0.000324492	4.04152	0.515815	0.0365545	0.000661024	5.67271e-05	1.69585e-05	7.4937e-06	9.32778e-05	0.000814199	0.000298468	0.436674	0.464534	0.000226178	1.85934e-05	0.0186941	0.00619535	0.00637889
C12	0.000186683	0.00809827	0.0432781	0.00128681	9.82355e-05	0.000387495	0.000180992	0.00617694	0.000637775	0.00345294	0.515815	3.96272	0.917596	0.000380339	1.51154e-05	0.000123092	2.80413e-05	1.75907e-05	0.00882001	0.000160756	0.017231	0.0185119	0.00237193	0.000168746	0.463816	0.0304264	0.0307438
C13	7.58921e-05	0.00166254	0.0196342	0.000585111	4.84237e-05	0.000237508	0.000224813	0.00248468	0.000241905	0.000994136	0.0365545	0.917596	4.08873	5.96382e-05	7.09952e-06	0.000106175	1.12802e-05	1.14589e-05	0.0057153	5.02656e-05	0.00893275	0.0063558	0.00122197	6.89773e-05	0.0283714	0.482051	0.484754
H14	0.0213915	0.0233753	0.00117445	0.00328169	0.444724	0.00392221	0.0161776	0.011731	0.00385378	0.00989379	0.000661024	0.000380339	5.96382e-05	0.349701	0.0136448	0.000293585	0.000281862	0.00458033	0.000314687	0.000301364	0.000649938	4.69005e-05	0.000244692	0.000589572	0.000660034	1.48497e-05	4.36631e-06
H15	0.0217397	0.00133317	0.00067098	0.00840706	0.464962	0.00281257	0.0194249	0.000449544	0.00994144	0.000291507	5.67271e-05	1.51154e-05	7.09952e-06	0.0136448	0.399358	0.00259281	0.000227465	0.00104344	6.71892e-05	0.000684631	0.000115168	1.8943e-05	1.3113e-05	0.000104451	2.09021e-05	1.19559e-06	7.93842e-07
H16	0.0202091	2.8531e-05	1.59056e-05	0.00841165	0.00397259	0.465976	0.000465426	0.0177049	0.000181797	0.00594506	1.69585e-05	0.000123092	0.000106175	0.000293585	0.00259281	0.401985	0.0148737	1.67737e-05	0.00478795	2.48563e-05	2.97361e-05	1.01844e-06	0.000427964	0.00383105	2.08055e-05	2.83471e-06	4.12756e-06
H17	0.0229318	7.19464e-05	3.77021e-05	0.00346849	0.00479404	0.464501	0.00100678	0.0189997	0.000551419	0.00989515	7.4937e-06	2.80413e-05	1.12802e-05	0.000281862	0.000227465	0.0148737	0.390632	1.36098e-05	0.00105833	5.84438e-05	1.00391e-05	1.08393e-06	0.000773401	0.00046982	5.40134e-05	1.17585e-06	3.2028e-06
H18	0.00547257	0.00895111	0.00162992	0.00127486	0.0191598	0.000334336	0.4693	0.000254947	0.0291861	0.000258561	9.32778e-05	1.75907e-05	1.14589e-05	0.00458033	0.00104344	1.67737e-05	1.36098e-05	0.401707	5.76863e-06	0.00357221	7.02066e-05	1.62927e-05	1.08784e-05	1.14384e-05	1.3638e-05	8.46317e-07	8.05596e-07
H19	0.00192803	4.02247e-05	0.000188877	0.0103442	0.000197943	0.0179447	2.29512e-05	0.458709	1.27691e-05	0.0266134	0.000814199	0.00882001	0.0057153	0.000314687	6.71892e-05	0.00478795	0.00105833	5.76863e-06	0.367007	1.13273e-06	0.000526828	3.60012e-05	0.00343734	0.00633128	0.00121639	0.00014357	0.000221821
H20	0.000711561	0.0294658	0.0058123	0.000169727	0.00541696	0.000163018	0.0267037	1.55968e-05	0.468327	3.53669e-05	0.000298468	0.000160756	5.02656e-05	0.000301364	0.000684631	2.48563e-05	5.84438e-05	0.00357221	1.13273e-06	0.3816	7.3835e-05	1.92838e-05	1.61285e-06	1.85661e-06	0.000165942	7.92106e-06	7.76675e-06
H21	0.0017872	0.00553707	0.0251564	0.0286243	0.000983976	0.000136609	0.00211576	0.000461868	0.00330697	0.000177599	0.436674	0.017231	0.00893275	0.000649938	0.000115168	2.97361e-05	1.00391e-05	7.02066e-05	0.000526828	7.3835e-05	0.324813	0.0128585	2.51721e-05	1.21356e-05	0.000788299	0.000395313	0.000661201
H22	7.41036e-05	0.00859492	0.0262085	0.000516326	5.12775e-05	6.74625e-06	0.000363915	3.56894e-05	0.000395811	7.62645e-05	0.464534	0.0185119	0.0063558	4.69005e-05	1.8943e-05	1.01844e-06	1.08393e-06	1.62927e-05	3.60012e-05	1.92838e-05	0.0128585	0.39993	7.9405e-05	3.69846e-06	0.00502719	0.00409991	0.000474306
H23	0.00127023	7.65849e-05	3.6959e-05	0.000260859	0.000158524	0.0063049	1.47752e-05	0.029412	1.09534e-05	0.479772	0.000226178	0.00237193	0.00122197	0.000244692	1.3113e-05	0.000427964	0.000773401	1.08784e-05	0.00343734	1.61285e-06	2.51721e-05	7.9405e-05	0.402743	0.0166799	0.00347607	8.99437e-05	0.000664408
H24	0.000776883	2.66462e-05	6.54927e-06	0.000459598	0.000321374	0.00621276	4.50389e-05	0.0304748	1.36994e-05	0.481606	1.85934e-05	0.000168746	6.89773e-05	0.000589572	0.000104451	0.00383105	0.00046982	1.14384e-05	0.00633128	1.85661e-06	1.21356e-05	3.69846e-06	0.0166799	0.416681	0.000271154	1.9218e-06	4.75774e-05
H25	0.000167996	0.0109277	0.00497391	0.000107032	0.00017063	0.000192537	8.85069e-05	0.00424316	0.000359446	0.00652286	0.0186941	0.463816	0.0283714	0.000660034	2.09021e-05	2.08055e-05	5.40134e-05	1.3638e-05	0.00121639	0.000165942	0.000788299	0.00502719	0.00347607	0.000271154	0.399788	0.00657038	0.00364788
H26	6.02147e-06	0.000458935	0.000935271	2.70877e-05	3.7449e-06	7.20966e-06	1.56377e-05	0.000101238	3.00394e-05	9.01822e-05	0.00619535	0.0304264	0.482051	1.48497e-05	1.19559e-06	2.83471e-06	1.17585e-06	8.46317e-07	0.00014357	7.92106e-06	0.000395313	0.00409991	8.99437e-05	1.9218e-06	0.00657038	0.416408	0.0171745
H27	9.71117e-06	0.000218826	0.0015701	4.3231e-05	4.96125e-06	2.01103e-05	1.64933e-05	0.000113419	3.42001e-05	0.000389442	0.00637889	0.0307438	0.484754	4.36631e-06	7.93842e-07	4.12756e-06	3.2028e-06	8.05596e-07	0.000221821	7.76675e-06	0.000661201	0.000474306	0.000664408	4.75774e-05	0.00364788	0.0171745	0.416817
LDM — ajoene_z_9_LIDI_matrix
	S1	S2	S3	O4	C5	C6	C7	C8	C9	C10	C11	C12	C13	H14	H15	H16	H17	H18	H19	H20	H21	H22	H23	H24	H25	H26	H27
S1	12.928	0.00336622	0.00053157	0.687627	0.464388	0.463561	0.0310592	0.027853	0.0122083	0.0173684	9.89268e-05	0.000246703	0.000551829	0.0218119	0.0224451	0.0227297	0.0184696	0.00702206	0.00196897	0.000631194	2.01763e-05	2.82016e-05	0.000733265	0.00132407	1.60525e-05	0.000128116	0.000197331		92.2252	31.7736
S2	0.00336622	14.4863	0.652499	0.00104811	0.0144694	0.00102695	0.0642903	0.00227824	0.577097	0.0110338	0.0381101	0.00948314	0.00457553	0.00176171	0.0145531	0.000124024	0.00207841	0.00946094	0.000272086	0.0272447	0.0053272	0.00852425	0.0178267	0.000523469	0.000561824	0.000189205	0.000366705
S3	0.00053157	0.652499	14.625	0.000177456	0.00175815	0.000272649	0.00984877	0.0001789	0.0410331	0.000588317	0.530014	0.0387557	0.0189201	0.000217987	0.00154446	1.64799e-05	0.000390826	0.00142022	2.05205e-05	0.0141689	0.028838	0.027277	0.000811053	2.09351e-05	0.00755758	0.00150244	0.00115822
O4	0.687627	0.00104811	0.000177456	8.36924	0.0626661	0.0615518	0.0092314	0.0168442	0.00465747	0.00353838	4.18756e-05	0.000236039	0.000443277	0.00640288	0.0038951	0.0030398	0.00737397	0.00101707	0.011362	0.000473424	8.58605e-06	1.64543e-05	0.000399135	0.000287516	1.65582e-05	9.01841e-05	0.000150997
C5	0.464388	0.0144694	0.00175815	0.0626661	4.07801	0.0245642	0.520548	0.00630423	0.0346403	0.003968	0.000119595	8.88972e-05	0.000119498	0.461142	0.45325	0.00504509	0.00343458	0.0187796	0.0001626	0.00547836	1.98844e-05	4.36509e-05	0.000224755	0.000124448	2.72414e-05	1.24997e-05	2.16492e-05
C6	0.463561	0.00102695	0.000272649	0.0615518	0.0245642	4.0756	0.00610648	0.517151	0.00304874	0.037014	0.000113115	0.00206532	0.00634781	0.00425934	0.00418198	0.466895	0.45128	0.000401086	0.018741	8.40468e-05	2.75901e-05	5.6429e-05	0.00549032	0.00634618	7.93558e-05	0.00110841	0.00150218
C7	0.0310592	0.0642903	0.00984877	0.0092314	0.520548	0.00610648	3.96538	0.000650378	0.87862	0.00044372	0.00179996	0.00135796	0.00168872	0.0192738	0.0166936	0.0005403	0.00810166	0.469497	0.000133707	0.0250166	0.000142937	0.000524838	0.000375329	2.02951e-05	0.000134417	7.45354e-05	7.56192e-05
C8	0.027853	0.00227824	0.0001789	0.0168442	0.00630423	0.517151	0.000650378	3.97309	0.000329518	0.914657	7.11848e-05	0.000167349	0.00089297	0.000548797	0.00906538	0.0195276	0.0164799	0.000158034	0.466088	2.34773e-05	0.000182857	5.47688e-06	0.0289436	0.0300584	3.17255e-05	0.000127571	0.00196955
C9	0.0122083	0.577097	0.0410331	0.00465747	0.0346403	0.00304874	0.87862	0.000329518	4.09903	0.000420815	0.00212088	0.00660565	0.00386363	0.0100939	0.00345297	0.00024277	0.0055646	0.030307	0.000126337	0.463857	0.000269052	0.000443221	0.000608903	2.79417e-05	0.00103865	0.000133002	0.000107093
C10	0.0173684	0.0110338	0.000588317	0.00353838	0.003968	0.037014	0.00044372	0.914657	0.000420815	4.08454	0.000420035	0.000480257	0.00247955	0.000389067	0.00866939	0.00976384	0.0049165	0.000145618	0.0276897	7.72049e-05	0.00118374	1.93276e-05	0.469409	0.483537	0.000107897	0.000152948	0.00531751
C11	9.89268e-05	0.0381101	0.530014	4.18756e-05	0.000119595	0.000113115	0.00179996	7.11848e-05	0.00212088	0.000420035	4.01434	0.516418	0.0366125	4.74188e-05	7.02309e-05	1.2021e-05	0.000233569	0.000116275	2.45415e-05	0.000362257	0.462545	0.461594	0.00171907	2.73367e-05	0.0196975	0.00626035	0.00599279
C12	0.000246703	0.00948314	0.0387557	0.000236039	8.88972e-05	0.00206532	0.00135796	0.000167349	0.00660565	0.000480257	0.516418	3.96852	0.911683	4.39933e-05	1.39623e-05	0.000100812	0.00453971	5.82947e-05	9.73138e-05	0.0014061	0.0182799	0.0195216	0.0012105	4.34639e-05	0.4718	0.0299326	0.0291262
C13	0.000551829	0.00457553	0.0189201	0.000443277	0.000119498	0.00634781	0.00168872	0.00089297	0.00386363	0.00247955	0.0366125	0.911683	4.07662	6.70427e-05	1.87356e-05	0.000460288	0.0139671	6.05296e-05	0.000192547	0.000324228	0.00613083	0.0102657	0.004549	0.000157737	0.0287308	0.481687	0.473901
H14	0.0218119	0.00176171	0.000217987	0.00640288	0.461142	0.00425934	0.0192738	0.000548797	0.0100939	0.000389067	4.74188e-05	4.39933e-05	6.70427e-05	0.382151	0.0138889	0.00097186	0.000387045	0.00108506	1.38e-05	0.000683701	4.19095e-06	1.90255e-05	4.25667e-05	1.31113e-05	2.64875e-06	3.99841e-06	5.84588e-06
H15	0.0224451	0.0145531	0.00154446	0.0038951	0.45325	0.00418198	0.0166936	0.00906538	0.00345297	0.00866939	7.02309e-05	1.39623e-05	1.87356e-05	0.0138889	0.369443	0.000320463	0.000399019	0.00483342	0.000189463	0.000210925	1.83575e-05	2.51715e-05	0.000625505	0.000213208	3.09214e-06	2.65992e-06	1.73999e-05
H16	0.0227297	0.000124024	1.64799e-05	0.0030398	0.00504509	0.466895	0.0005403	0.0195276	0.00024277	0.00976384	1.2021e-05	0.000100812	0.000460288	0.00097186	0.000320463	0.399814	0.0143086	1.96003e-05	0.00123639	7.47418e-06	1.64016e-06	2.34118e-06	0.000450366	0.000778322	4.41577e-06	0.000274894	0.000115206
H17	0.0184696	0.00207841	0.000390826	0.00737397	0.00343458	0.45128	0.00810166	0.0164799	0.0055646	0.0049165	0.000233569	0.00453971	0.0139671	0.000387045	0.000399019	0.0143086	0.369204	0.000213597	0.00450133	0.000115282	2.42479e-05	0.000131779	0.0027171	0.000347333	0.00013582	0.00203872	0.00216258
H18	0.00702206	0.00946094	0.00142022	0.00101707	0.0187796	0.000401086	0.469497	0.000158034	0.030307	0.000145618	0.000116275	5.82947e-05	6.05296e-05	0.00108506	0.00483342	1.96003e-05	0.000213597	0.399401	7.8356e-06	0.00376155	8.97134e-06	3.96093e-05	2.4359e-05	7.91962e-06	1.60142e-05	3.83138e-06	3.24457e-06
H19	0.00196897	0.000272086	2.05205e-05	0.011362	0.0001626	0.018741	0.000133707	0.466088	0.000126337	0.0276897	2.45415e-05	9.73138e-05	0.000192547	1.38e-05	0.000189463	0.00123639	0.00450133	7.8356e-06	0.384275	6.19085e-06	7.17808e-05	1.39502e-06	0.0060379	0.00356694	5.60101e-06	2.83201e-05	0.000108833
H20	0.000631194	0.0272447	0.0141689	0.000473424	0.00547836	8.40468e-05	0.0250166	2.34773e-05	0.463857	7.72049e-05	0.000362257	0.0014061	0.000324228	0.000683701	0.000210925	7.47418e-06	0.000115282	0.00376155	6.19085e-06	0.371837	0.000190067	2.60141e-05	9.95821e-05	3.76658e-06	0.000907688	1.68838e-05	2.81377e-05
H21	2.01763e-05	0.0053272	0.028838	8.58605e-06	1.98844e-05	2.75901e-05	0.000142937	0.000182857	0.000269052	0.00118374	0.462545	0.0182799	0.00613083	4.19095e-06	1.83575e-05	1.64016e-06	2.42479e-05	8.97134e-06	7.17808e-05	0.000190067	0.392673	0.0143779	0.00261864	6.82746e-05	0.00515283	0.000442636	0.00386279
H22	2.82016e-05	0.00852425	0.027277	1.64543e-05	4.36509e-05	5.6429e-05	0.000524838	5.47688e-06	0.000443221	1.93276e-05	0.461594	0.0195216	0.0102657	1.90255e-05	2.51715e-05	2.34118e-06	0.000131779	3.96093e-05	1.39502e-06	2.60141e-05	0.0143779	0.391952	0.000117399	9.67994e-07	0.00111417	0.000760688	0.000465122
H23	0.000733265	0.0178267	0.000811053	0.000399135	0.000224755	0.00549032	0.000375329	0.0289436	0.000608903	0.469409	0.00171907	0.0012105	0.004549	4.25667e-05	0.000625505	0.000450366	0.0027171	2.4359e-05	0.0060379	9.95821e-05	0.00261864	0.000117399	0.395174	0.0161554	0.000156648	0.000274605	0.00545514
H24	0.00132407	0.000523469	2.09351e-05	0.000287516	0.000124448	0.00634618	2.02951e-05	0.0300584	2.79417e-05	0.483537	2.73367e-05	4.34639e-05	0.000157737	1.31113e-05	0.000213208	0.000778322	0.000347333	7.91962e-06	0.00356694	3.76658e-06	6.82746e-05	9.67994e-07	0.0161554	0.410073	4.77525e-06	9.87519e-06	0.000262846
H25	1.60525e-05	0.000561824	0.00755758	1.65582e-05	2.72414e-05	7.93558e-05	0.000134417	3.17255e-05	0.00103865	0.000107897	0.0196975	0.4718	0.0287308	2.64875e-06	3.09214e-06	4.41577e-06	0.00013582	1.60142e-05	5.60101e-06	0.000907688	0.00515283	0.00111417	0.000156648	4.77525e-06	0.409217	0.00365723	0.0065124
H26	0.000128116	0.000189205	0.00150244	9.01841e-05	1.24997e-05	0.00110841	7.45354e-05	0.000127571	0.000133002	0.000152948	0.00626035	0.0299326	0.481687	3.99841e-06	2.65992e-06	0.000274894	0.00203872	3.83138e-06	2.83201e-05	1.68838e-05	0.000442636	0.000760688	0.000274605	9.87519e-06	0.00365723	0.407453	0.0163772
H27	0.000197331	0.000366705	0.00115822	0.000150997	2.16492e-05	0.00150218	7.56192e-05	0.00196955	0.000107093	0.00531751	0.00599279	0.0291262	0.473901	5.84588e-06	1.73999e-05	0.000115206	0.00216258	3.24457e-06	0.000108833	2.81377e-05	0.00386279	0.000465122	0.00545514	0.000262846	0.0065124	0.0163772	0.398884
LDM — ajoene_z_10_LIDI_matrix
	S1	S2	S3	O4	C5	C6	C7	C8	C9	C10	C11	C12	C13	H14	H15	H16	H17	H18	H19	H20	H21	H22	H23	H24	H25	H26	H27
S1	12.937	0.00273872	0.000586643	0.684518	0.466674	0.466003	0.0282248	0.0277307	0.0124168	0.0147063	7.71393e-05	3.84581e-05	1.29359e-05	0.0182676	0.0227906	0.0237904	0.0227737	0.00388169	0.00404632	0.00090672	9.75723e-06	1.10504e-05	0.000788012	0.000928505	4.82612e-06	4.22569e-06	1.77333e-06		92.272	31.7292
S2	0.00273872	14.5152	0.645662	0.00164234	0.0172454	0.000538478	0.0595642	0.00261982	0.573331	0.00970055	0.038326	0.00975156	0.0091974	0.0189642	0.00167766	0.00056395	0.000114353	0.00866101	0.000149387	0.0275867	0.00828677	0.00714643	0.00624586	0.000502388	0.000568899	0.00330034	0.000310769
S3	0.000586643	0.645662	14.635	0.00024878	0.00158233	0.000211845	0.0169627	0.000650426	0.0426215	0.00497672	0.527171	0.0404201	0.0227305	0.000879439	0.000542404	0.000255647	1.87953e-05	0.00146608	0.000200133	0.00622603	0.0268587	0.0290509	0.0105782	0.000623607	0.00586894	0.00134485	0.00150737
O4	0.684518	0.00164234	0.00024878	8.36786	0.0615565	0.0627453	0.0148023	0.00947665	0.00258503	0.00538423	6.0186e-05	1.17664e-05	5.12094e-06	0.00772687	0.00375157	0.00523566	0.00557996	0.0170392	0.000725578	0.000242614	1.62813e-05	6.15112e-06	0.000285307	0.000592351	3.47625e-06	2.36074e-06	9.57971e-07
C5	0.466674	0.0172454	0.00158233	0.0615565	4.07954	0.0234532	0.517554	0.00713066	0.0344036	0.00442066	0.000268132	0.000159146	0.000135085	0.453405	0.463114	0.00321197	0.00469298	0.0174905	0.000300675	0.00528791	6.99803e-05	2.0785e-05	0.000279913	0.000119858	2.03249e-05	1.14186e-05	6.18258e-06
C6	0.466003	0.000538478	0.000211845	0.0627453	0.0234532	4.07047	0.00863688	0.520248	0.00297038	0.0372242	8.68523e-06	3.64348e-06	5.01034e-06	0.00186196	0.00505055	0.45672	0.463546	0.000629302	0.0199202	0.000106726	1.29648e-06	2.85426e-06	0.00593198	0.00631503	3.48311e-07	1.02034e-06	4.75136e-07
C7	0.0282248	0.0595642	0.0169627	0.0148023	0.517554	0.00863688	3.96388	0.000925437	0.881322	0.00121686	0.000818056	0.000456841	0.000540091	0.0167859	0.0196949	0.0111122	0.000726299	0.457377	0.000172694	0.0253909	0.000214416	0.000198811	0.00136672	8.51961e-05	3.28064e-05	9.07996e-05	4.32298e-05
C8	0.0277307	0.00261982	0.000650426	0.00947665	0.00713066	0.520248	0.000925437	3.98508	0.000475368	0.915266	4.30232e-05	9.99307e-06	9.08718e-06	0.00853399	0.000774129	0.0173103	0.018828	0.00013189	0.474628	2.04606e-05	3.63544e-06	8.69517e-06	0.0287421	0.0299895	8.34104e-07	2.353e-06	3.61887e-07
C9	0.0124168	0.573331	0.0426215	0.00258503	0.0344036	0.00297038	0.881322	0.000475368	4.10089	0.00177248	0.00199398	0.00466757	0.0042057	0.0042144	0.0106634	0.00502931	0.000217915	0.0274804	0.000139626	0.46233	0.000473071	0.00034832	0.00280276	0.000145468	0.000405141	0.000207804	0.000128524
C10	0.0147063	0.00970055	0.00497672	0.00538423	0.00442066	0.0372242	0.00121686	0.915266	0.00177248	4.07166	0.000348262	4.97469e-05	5.21213e-05	0.00710375	0.000339439	0.00590321	0.00959214	8.53834e-05	0.0297434	6.9847e-05	1.40089e-05	5.75243e-05	0.471723	0.482695	3.89503e-06	7.10042e-06	2.82807e-06
C11	7.71393e-05	0.038326	0.527171	6.0186e-05	0.000268132	8.68523e-06	0.000818056	4.30232e-05	0.00199398	0.000348262	4.01096	0.517192	0.0364517	0.000278034	2.30103e-05	8.983e-06	8.61885e-07	9.89327e-05	1.62868e-05	0.000575822	0.464215	0.462983	0.00072815	4.2379e-05	0.0199263	0.00626624	0.00628306
C12	3.84581e-05	0.00975156	0.0404201	1.17664e-05	0.000159146	3.64348e-06	0.000456841	9.99307e-06	0.00466757	4.97469e-05	0.517192	3.97002	0.9131	3.38164e-05	1.8026e-05	3.29009e-06	4.66171e-07	5.19949e-05	1.55554e-06	0.00837338	0.0192066	0.0183626	6.33693e-05	1.45167e-05	0.473313	0.0296728	0.0302627
C13	1.29359e-05	0.0091974	0.0227305	5.12094e-06	0.000135085	5.01034e-06	0.000540091	9.08718e-06	0.0042057	5.21213e-05	0.0364517	0.9131	4.07823	3.01635e-05	3.21409e-05	4.37068e-06	3.74366e-07	3.27661e-05	2.1255e-06	0.0069055	0.00880657	0.00622502	7.40469e-05	1.53616e-05	0.029162	0.479551	0.483485
H14	0.0182676	0.0189642	0.000879439	0.00772687	0.453405	0.00186196	0.0167859	0.00853399	0.0042144	0.00710375	0.000278034	3.38164e-05	3.01635e-05	0.365741	0.0140065	0.000102707	0.000226005	0.00427096	0.000243179	0.000282195	6.47757e-05	1.72622e-05	0.000336713	0.000169841	2.24543e-06	9.71611e-06	1.15349e-06
H15	0.0227906	0.00167766	0.000542404	0.00375157	0.463114	0.00505055	0.0196949	0.000774129	0.0106634	0.000339439	2.30103e-05	1.8026e-05	3.21409e-05	0.0140065	0.388108	0.000242775	0.000986759	0.000575609	1.75042e-05	0.000663203	5.97917e-06	6.31529e-06	3.44594e-05	7.32758e-06	8.55173e-07	2.74443e-06	2.33142e-06
H16	0.0237904	0.00056395	0.000255647	0.00523566	0.00321197	0.45672	0.0111122	0.0173103	0.00502931	0.00590321	8.983e-06	3.29009e-06	4.37068e-06	0.000102707	0.000242775	0.379702	0.0141939	0.00135381	0.00491178	0.00013605	1.13665e-06	3.50833e-06	0.00352671	0.000413109	3.5852e-07	1.14543e-06	4.89354e-07
H17	0.0227737	0.000114353	1.87953e-05	0.00557996	0.00469298	0.463546	0.000726299	0.018828	0.000217915	0.00959214	8.61885e-07	4.66171e-07	3.74366e-07	0.000226005	0.000986759	0.0141939	0.39026	3.93246e-05	0.00142795	8.58758e-06	1.39383e-07	3.01894e-07	0.000474338	0.000792148	5.06682e-08	1.89255e-07	3.61803e-08
H18	0.00388169	0.00866101	0.00146608	0.0170392	0.0174905	0.000629302	0.457377	0.00013189	0.0274804	8.53834e-05	9.89327e-05	5.19949e-05	3.27661e-05	0.00427096	0.000575609	0.00135381	3.93246e-05	0.364403	3.4224e-05	0.0032752	3.37358e-05	1.71476e-05	3.30529e-05	3.62155e-06	1.08832e-05	5.26156e-06	2.92305e-06
H19	0.00404632	0.000149387	0.000200133	0.000725578	0.000300675	0.0199202	0.000172694	0.474628	0.000139626	0.0297434	1.62868e-05	1.55554e-06	2.1255e-06	0.000243179	1.75042e-05	0.00491178	0.00142795	3.4224e-05	0.412603	3.94636e-06	4.77392e-07	3.21581e-06	0.00644989	0.00368009	2.0092e-07	1.61424e-07	1.19463e-07
H20	0.00090672	0.0275867	0.00622603	0.000242614	0.00528791	0.000106726	0.0253909	2.04606e-05	0.46233	6.9847e-05	0.000575822	0.00837338	0.0069055	0.000282195	0.000663203	0.00013605	8.58758e-06	0.0032752	3.94636e-06	0.369102	9.10254e-05	8.98763e-05	6.52191e-05	6.82699e-06	0.000998613	0.00017628	0.000368021
H21	9.75723e-06	0.00828677	0.0268587	1.62813e-05	6.99803e-05	1.29648e-06	0.000214416	3.63544e-06	0.000473071	1.40089e-05	0.464215	0.0192066	0.00880657	6.47757e-05	5.97917e-06	1.13665e-06	1.39383e-07	3.37358e-05	4.77392e-07	9.10254e-05	0.396491	0.0144812	1.57829e-05	1.05488e-06	0.00158203	0.000484154	0.000803582
H22	1.10504e-05	0.00714643	0.0290509	6.15112e-06	2.0785e-05	2.85426e-06	0.000198811	8.69517e-06	0.00034832	5.75243e-05	0.462983	0.0183626	0.00622502	1.72622e-05	6.31529e-06	3.50833e-06	3.01894e-07	1.71476e-05	3.21581e-06	8.98763e-05	0.0144812	0.39132	0.000160649	2.70897e-06	0.00508718	0.00403341	0.00044245
H23	0.000788012	0.00624586	0.0105782	0.000285307	0.000279913	0.00593198	0.00136672	0.0287421	0.00280276	0.471723	0.00072815	6.33693e-05	7.40469e-05	0.000336713	3.44594e-05	0.00352671	0.000474338	3.30529e-05	0.00644989	6.52191e-05	1.57829e-05	0.000160649	0.39293	0.01616	9.7922e-06	6.53534e-06	4.31633e-06
H24	0.000928505	0.000502388	0.000623607	0.000592351	0.000119858	0.00631503	8.51961e-05	0.0299895	0.000145468	0.482695	4.2379e-05	1.45167e-05	1.53616e-05	0.000169841	7.32758e-06	0.000413109	0.000792148	3.62155e-06	0.00368009	6.82699e-06	1.05488e-06	2.70897e-06	0.01616	0.407089	4.71385e-07	6.99115e-07	9.97804e-07
H25	4.82612e-06	0.000568899	0.00586894	3.47625e-06	2.03249e-05	3.48311e-07	3.28064e-05	8.34104e-07	0.000405141	3.89503e-06	0.0199263	0.473313	0.029162	2.24543e-06	8.55173e-07	3.5852e-07	5.06682e-08	1.08832e-05	2.0092e-07	0.000998613	0.00158203	0.00508718	9.7922e-06	4.71385e-07	0.412319	0.0067536	0.00364196
H26	4.22569e-06	0.00330034	0.00134485	2.36074e-06	1.14186e-05	1.02034e-06	9.07996e-05	2.353e-06	0.000207804	7.10042e-06	0.00626624	0.0296728	0.479551	9.71611e-06	2.74443e-06	1.14543e-06	1.89255e-07	5.26156e-06	1.61424e-07	0.00017628	0.000484154	0.00403341	6.53534e-06	6.99115e-07	0.0067536	0.406863	0.0166111
H27	1.77333e-06	0.000310769	0.00150737	9.57971e-07	6.18258e-06	4.75136e-07	4.32298e-05	3.61887e-07	0.000128524	2.82807e-06	0.00628306	0.0302627	0.483485	1.15349e-06	2.33142e-06	4.89354e-07	3.61803e-08	2.92305e-06	1.19463e-07	0.000368021	0.000803582	0.00044245	4.31633e-06	9.97804e-07	0.00364196	0.0166111	0.409284
LDM — ajoene_z_11_LIDI_matrix
	S1	S2	S3	O4	C5	C6	C7	C8	C9	C10	C11	C12	C13	H14	H15	H16	H17	H18	H19	H20	H21	H22	H23	H24	H25	H26	H27
S1	12.9341	0.00310691	0.000402089	0.68703	0.461465	0.462861	0.0279911	0.0323764	0.0149927	0.0165	0.000117809	7.15323e-05	0.000330571	0.0219152	0.0184982	0.0219854	0.0221293	0.00267419	0.00389364	0.000966265	1.18877e-05	0.00011102	0.000712566	0.000883976	1.69575e-05	0.000790748	6.53767e-05		92.2414	31.761
S2	0.00310691	14.5054	0.649383	0.00142039	0.0143703	0.00127713	0.0643955	0.000927726	0.575643	0.00716065	0.0377647	0.0133375	0.00723014	0.00169197	0.0142368	0.000148585	0.00342418	0.00889048	0.000304016	0.0273164	0.00898463	0.00383381	0.0179888	0.000506693	0.000563752	0.000519324	0.000261762
S3	0.000402089	0.649383	14.6267	0.000318971	0.00181642	9.66871e-05	0.0102855	0.000129023	0.0418449	0.000633532	0.529219	0.0392398	0.0200312	0.000219311	0.00154393	1.21082e-05	0.000243992	0.00131984	2.95866e-05	0.0151686	0.0273395	0.0290513	0.00115424	4.29531e-05	0.00742504	0.00121673	0.00148573
O4	0.68703	0.00142039	0.000318971	8.36258	0.0618611	0.0623489	0.0190576	0.00920344	0.00321719	0.00577765	3.07931e-05	2.19672e-05	8.71383e-05	0.00292146	0.00750419	0.00735583	0.00337113	0.0153356	0.00056694	0.000272225	9.3408e-06	2.57888e-05	0.00027949	0.000581844	4.32107e-06	0.000191501	2.32675e-05
C5	0.461465	0.0143703	0.00181642	0.0618611	4.07276	0.0247369	0.51793	0.00523238	0.0352152	0.00463107	0.000132657	4.34813e-05	4.41193e-05	0.464943	0.456249	0.0039291	0.0053259	0.0175135	0.00032609	0.00550838	3.90198e-05	6.69425e-05	0.000746949	0.000116585	3.50277e-06	4.99895e-05	9.39138e-06
C6	0.462861	0.00127713	9.66871e-05	0.0623489	0.0247369	4.0747	0.00620177	0.520007	0.00330506	0.036573	5.01544e-05	0.000363122	0.00178848	0.00489383	0.003652	0.463884	0.454371	0.000160097	0.0199495	9.76149e-05	7.60584e-06	0.00010756	0.00529584	0.006381	6.34206e-05	0.00382345	0.000109531
C7	0.0279911	0.0643955	0.0102855	0.0190576	0.51793	0.00620177	3.95692	0.000708241	0.881252	0.000451744	0.00185372	0.000352201	0.000121656	0.0197919	0.0165841	0.000425727	0.00898377	0.459044	0.000185393	0.0251489	0.000274963	0.000889546	0.00037767	2.17499e-05	3.86162e-05	5.54989e-05	4.00553e-06
C8	0.0323764	0.000927726	0.000129023	0.00920344	0.00523238	0.520007	0.000708241	3.98485	0.000328789	0.913663	5.73561e-05	0.000967156	0.00298679	0.00049535	0.00674192	0.0186106	0.0170663	0.000112322	0.474317	1.57969e-05	2.68391e-05	1.4069e-05	0.0275708	0.0303313	4.04616e-05	0.00110671	0.00129979
C9	0.0149927	0.575643	0.0418449	0.00321719	0.0352152	0.00330506	0.881252	0.000328789	4.11133	0.000325207	0.00349926	0.000639118	0.000272707	0.0097755	0.00349656	0.000263037	0.00707582	0.0280534	0.000165653	0.463668	0.000398111	0.00354409	0.000651799	2.1146e-05	0.000150305	0.000158522	1.54177e-05
C10	0.0165	0.00716065	0.000633532	0.00577765	0.00463107	0.036573	0.000451744	0.913663	0.000325207	4.08587	0.000185091	0.00268922	0.0098517	0.000446883	0.00874114	0.00869799	0.00504763	0.000135603	0.0296268	5.2941e-05	7.44042e-05	9.93297e-06	0.463976	0.483687	8.04296e-05	0.00112796	0.00324561
C11	0.000117809	0.0377647	0.529219	3.07931e-05	0.000132657	5.01544e-05	0.00185372	5.73561e-05	0.00349926	0.000185091	4.01389	0.516901	0.037014	5.11387e-05	7.54786e-05	6.79672e-06	0.000258138	0.000103609	7.04959e-06	0.000788774	0.462253	0.46264	0.000305343	9.58154e-06	0.0197507	0.00633662	0.00621731
C12	7.15323e-05	0.0133375	0.0392398	2.19672e-05	4.34813e-05	0.000363122	0.000352201	0.000967156	0.000639118	0.00268922	0.516901	3.96903	0.912687	9.40218e-06	3.59668e-05	4.29123e-05	0.000797162	2.04083e-05	0.000109446	0.000187211	0.0192533	0.0183967	0.00484815	0.00010937	0.472497	0.0297929	0.0294513
C13	0.000330571	0.00723014	0.0200312	8.71383e-05	4.41193e-05	0.00178848	0.000121656	0.00298679	0.000272707	0.0098517	0.037014	0.912687	4.06769	4.13614e-06	3.90875e-05	0.000135123	0.00380397	6.65899e-06	0.000189808	6.50696e-05	0.00986488	0.00641379	0.0105763	0.000340681	0.0287402	0.475897	0.480461
H14	0.0219152	0.00169197	0.000219311	0.00292146	0.464943	0.00489383	0.0197919	0.00049535	0.0097755	0.000446883	5.11387e-05	9.40218e-06	4.13614e-06	0.391742	0.0144302	0.000958241	0.000435684	0.00101646	1.47306e-05	0.000682724	1.04357e-05	2.59002e-05	0.000108498	1.7062e-05	7.3109e-07	1.04592e-05	8.93768e-07
H15	0.0184982	0.0142368	0.00154393	0.00750419	0.456249	0.003652	0.0165841	0.00674192	0.00349656	0.00874114	7.54786e-05	3.59668e-05	3.90875e-05	0.0144302	0.376771	0.000425944	0.000775279	0.00456089	0.000151307	0.000215878	3.64346e-05	5.33651e-06	0.00193749	0.000235018	1.06285e-06	7.05286e-06	1.20958e-05
H16	0.0219854	0.000148585	1.21082e-05	0.00735583	0.0039291	0.463884	0.000425727	0.0186106	0.000263037	0.00869799	6.79672e-06	4.29123e-05	0.000135123	0.000958241	0.000425944	0.387847	0.0141513	1.4168e-05	0.00182043	6.97856e-06	1.33792e-06	8.52963e-06	0.0004216	0.000792528	8.82083e-06	0.000277754	3.11602e-05
H17	0.0221293	0.00342418	0.000243992	0.00337113	0.0053259	0.454371	0.00898377	0.0170663	0.00707582	0.00504763	0.000258138	0.000797162	0.00380397	0.000435684	0.000775279	0.0141513	0.376645	0.000191168	0.00463843	0.00014208	2.80562e-05	0.000348952	0.0025003	0.000335062	0.000130378	0.00524432	0.000209973
H18	0.00267419	0.00889048	0.00131984	0.0153356	0.0175135	0.000160097	0.459044	0.000112322	0.0280534	0.000135603	0.000103609	2.04083e-05	6.65899e-06	0.00101646	0.00456089	1.4168e-05	0.000191168	0.365922	5.86049e-06	0.00356506	1.78467e-05	4.39164e-05	3.06809e-05	4.30014e-06	4.17802e-06	2.32435e-06	5.34886e-07
H19	0.00389364	0.000304016	2.95866e-05	0.00056694	0.00032609	0.0199495	0.000185393	0.474317	0.000165653	0.0296268	7.04959e-06	0.000109446	0.000189808	1.47306e-05	0.000151307	0.00182043	0.00463843	5.86049e-06	0.412319	6.45314e-06	2.76481e-06	6.655e-06	0.00620442	0.00378321	3.62785e-06	6.1018e-05	3.84875e-05
H20	0.000966265	0.0273164	0.0151686	0.000272225	0.00550838	9.76149e-05	0.0251489	1.57969e-05	0.463668	5.2941e-05	0.000788774	0.000187211	6.50696e-05	0.000682724	0.000215878	6.97856e-06	0.00014208	0.00356506	6.45314e-06	0.371614	7.00321e-05	0.000907541	0.000127792	3.36493e-06	4.82147e-05	8.73938e-06	5.55434e-06
H21	1.18877e-05	0.00898463	0.0273395	9.3408e-06	3.90198e-05	7.60584e-06	0.000274963	2.68391e-05	0.000398111	7.44042e-05	0.462253	0.0192533	0.00986488	1.04357e-05	3.64346e-05	1.33792e-06	2.80562e-05	1.78467e-05	2.76481e-06	7.00321e-05	0.393312	0.0145815	0.000129529	4.25541e-06	0.00119254	0.000486122	0.000752076
H22	0.00011102	0.00383381	0.0290513	2.57888e-05	6.69425e-05	0.00010756	0.000889546	1.4069e-05	0.00354409	9.93297e-06	0.46264	0.0183967	0.00641379	2.59002e-05	5.33651e-06	8.52963e-06	0.000348952	4.39164e-05	6.655e-06	0.000907541	0.0145815	0.395167	1.89637e-05	4.93997e-07	0.0051507	0.00432244	0.000468038
H23	0.000712566	0.0179888	0.00115424	0.00027949	0.000746949	0.00529584	0.00037767	0.0275708	0.000651799	0.463976	0.000305343	0.00484815	0.0105763	0.000108498	0.00193749	0.0004216	0.0025003	3.06809e-05	0.00620442	0.000127792	0.000129529	1.89637e-05	0.373606	0.0154728	0.000140513	0.000679052	0.00103034
H24	0.000883976	0.000506693	4.29531e-05	0.000581844	0.000116585	0.006381	2.17499e-05	0.0303313	2.1146e-05	0.483687	9.58154e-06	0.00010937	0.000340681	1.7062e-05	0.000235018	0.000792528	0.000335062	4.30014e-06	0.00378321	3.36493e-06	4.25541e-06	4.93997e-07	0.0154728	0.410532	3.75873e-06	4.00826e-05	0.000133003
H25	1.69575e-05	0.000563752	0.00742504	4.32107e-06	3.50277e-06	6.34206e-05	3.86162e-05	4.04616e-05	0.000150305	8.04296e-05	0.0197507	0.472497	0.0287402	7.3109e-07	1.06285e-06	8.82083e-06	0.000130378	4.17802e-06	3.62785e-06	4.82147e-05	0.00119254	0.0051507	0.000140513	3.75873e-06	0.408435	0.00661115	0.00357924
H26	0.000790748	0.000519324	0.00121673	0.000191501	4.99895e-05	0.00382345	5.54989e-05	0.00110671	0.000158522	0.00112796	0.00633662	0.0297929	0.475897	1.04592e-05	7.05286e-06	0.000277754	0.00524432	2.32435e-06	6.1018e-05	8.73938e-06	0.000486122	0.00432244	0.000679052	4.00826e-05	0.00661115	0.40753	0.016456
H27	6.53767e-05	0.000261762	0.00148573	2.32675e-05	9.39138e-06	0.000109531	4.00553e-06	0.00129979	1.54177e-05	0.00324561	0.00621731	0.0294513	0.480461	8.93768e-07	1.20958e-05	3.11602e-05	0.000209973	5.34886e-07	3.84875e-05	5.55434e-06	0.000752076	0.000468038	0.00103034	0.000133003	0.00357924	0.016456	0.40413
LDM — ajoene_z_12_LIDI_matrix
	S1	S2	S3	O4	C5	C6	C7	C8	C9	C10	C11	C12	C13	H14	H15	H16	H17	H18	H19	H20	H21	H22	H23	H24	H25	H26	H27
S1	12.9216	0.00284598	0.000389818	0.685273	0.464036	0.463382	0.0282426	0.0295722	0.0138738	0.0198546	0.000102387	2.8395e-05	6.99263e-05	0.0227032	0.0185938	0.0243756	0.022426	0.00328955	0.00122194	0.000966959	1.06865e-05	8.2639e-05	0.000910211	0.00124718	4.63637e-06	3.78587e-06	0.000162159		92.252	31.749
S2	0.00284598	14.5085	0.650725	0.00150974	0.0153064	0.000807213	0.0641972	0.00540925	0.575668	0.000585025	0.0380666	0.0115476	0.00638982	0.00179927	0.0160805	0.000564484	0.000208507	0.00894513	0.0147406	0.0274318	0.00890174	0.00479201	0.000117737	0.000229694	0.000540478	0.000226973	0.000318486
S3	0.000389818	0.650725	14.6236	0.000355183	0.00190826	7.95369e-05	0.0103544	0.000283508	0.042163	5.9285e-05	0.529933	0.0399901	0.0190466	0.000219289	0.00162198	8.2636e-05	1.34119e-05	0.00134357	0.000783254	0.0148535	0.0274117	0.0286358	8.96884e-05	1.24361e-05	0.00879519	0.00154334	0.00117404
O4	0.685273	0.00150974	0.000355183	8.36737	0.062298	0.0630112	0.0133382	0.0101911	0.00279152	0.00658104	2.728e-05	1.08572e-05	3.18017e-05	0.00432635	0.00805777	0.00733733	0.00389735	0.0140814	0.000450601	0.000260415	5.98934e-06	2.8355e-05	0.000538741	0.000417705	2.97462e-06	2.50184e-06	6.47519e-05
C5	0.464036	0.0153064	0.00190826	0.062298	4.07439	0.0230374	0.518268	0.00827484	0.0350209	0.00228735	0.000128822	3.53939e-05	2.50834e-05	0.462028	0.457447	0.00230233	0.00502535	0.0175792	0.00331187	0.00551752	3.79528e-05	4.28277e-05	7.34341e-05	0.000154193	2.4835e-06	2.0674e-06	1.7238e-05
C6	0.463382	0.000807213	7.95369e-05	0.0630112	0.0230374	4.07146	0.00947011	0.520332	0.00323428	0.0374691	4.06722e-05	7.7324e-05	0.000307008	0.00497808	0.00138464	0.458159	0.465243	0.000641911	0.0180871	0.000114559	6.95729e-06	0.000102334	0.00631039	0.00605576	6.88509e-06	3.26393e-05	0.000356306
C7	0.0282426	0.0641972	0.0103544	0.0133382	0.518268	0.00947011	3.96325	0.00196013	0.880888	0.000460274	0.00185034	0.000344383	0.000157236	0.0193732	0.0169267	0.00988619	0.00090015	0.459603	0.00221734	0.0251983	0.000349927	0.000522039	3.40191e-05	7.89974e-05	3.75208e-05	4.44449e-06	1.22137e-05
C8	0.0295722	0.00540925	0.000283508	0.0101911	0.00827484	0.520332	0.00196013	3.98481	0.00173217	0.913513	0.000318137	0.000931785	0.00480687	0.000801139	0.00814519	0.0177997	0.0182343	0.000137421	0.457775	3.69952e-05	2.32887e-05	0.000743605	0.0295367	0.0299355	0.000156828	0.000239222	0.00829439
C9	0.0138738	0.575668	0.042163	0.00279152	0.0350209	0.00323428	0.880888	0.00173217	4.11047	0.00021453	0.00269681	0.000644425	0.000211	0.0103107	0.00386344	0.00449458	0.000234111	0.0280801	0.00337794	0.464421	0.000341378	0.00206846	3.76558e-05	9.80437e-05	0.000145291	1.05169e-05	2.75922e-05
C10	0.0198546	0.000585025	5.9285e-05	0.00658104	0.00228735	0.0374691	0.000460274	0.913513	0.00021453	4.08311	8.00036e-05	0.000565084	0.00389294	0.000126899	0.00264644	0.00722166	0.00675451	8.05959e-05	0.0273838	9.25262e-06	1.40168e-05	0.000172629	0.480263	0.48101	0.000111466	0.000464233	0.00668182
C11	0.000102387	0.0380666	0.529933	2.728e-05	0.000128822	4.06722e-05	0.00185034	0.000318137	0.00269681	8.00036e-05	4.01556	0.516017	0.0369581	5.2655e-05	8.57752e-05	7.20371e-05	7.79388e-06	0.000105919	0.00102454	0.000389087	0.46189	0.463083	6.26169e-05	1.59342e-05	0.0197477	0.0063096	0.00600504
C12	2.8395e-05	0.0115476	0.0399901	1.08572e-05	3.53939e-05	7.7324e-05	0.000344383	0.000931785	0.000644425	0.000565084	0.516017	3.97125	0.918631	1.08691e-05	3.17594e-05	2.48082e-05	2.59671e-05	2.32653e-05	0.00226009	0.000198715	0.0194474	0.0182838	0.000962063	2.96925e-05	0.471861	0.030321	0.0292195
C13	6.99263e-05	0.00638982	0.0190466	3.18017e-05	2.50834e-05	0.000307008	0.000157236	0.00480687	0.000211	0.00389294	0.0369581	0.918631	4.08222	4.46745e-06	3.22891e-05	4.54463e-05	6.80755e-05	8.09746e-06	0.00630982	9.08164e-05	0.0104873	0.00613128	0.0039751	0.000226515	0.028732	0.48303	0.472186
H14	0.0227032	0.00179927	0.000219289	0.00432635	0.462028	0.00497808	0.0193732	0.000801139	0.0103107	0.000126899	5.2655e-05	1.08691e-05	4.46745e-06	0.385248	0.0143086	0.000184012	0.000920347	0.000727013	0.000302547	0.000686799	1.26991e-05	1.77957e-05	5.44354e-06	1.49504e-05	8.22472e-07	1.62553e-07	1.34179e-06
H15	0.0185938	0.0160805	0.00162198	0.00805777	0.457447	0.00138464	0.0169267	0.00814519	0.00386344	0.00264644	8.57752e-05	3.17594e-05	3.22891e-05	0.0143086	0.380674	0.000125391	0.000175826	0.00457673	0.00412034	0.000243933	2.65719e-05	1.10639e-05	8.86352e-05	0.000119241	1.01018e-06	2.54988e-06	1.96906e-05
H16	0.0243756	0.000564484	8.2636e-05	0.00733733	0.00230233	0.458159	0.00988619	0.0177997	0.00449458	0.00722166	7.20371e-05	2.48082e-05	4.54463e-05	0.000184012	0.000125391	0.378518	0.0143644	0.00135443	0.00190937	0.000130447	1.00229e-05	0.000104719	0.000775406	0.000444716	7.25239e-06	4.19886e-06	6.11427e-05
H17	0.022426	0.000208507	1.34119e-05	0.00389735	0.00502535	0.465243	0.00090015	0.0182343	0.000234111	0.00675451	7.79388e-06	2.59671e-05	6.80755e-05	0.000920347	0.000175826	0.0143644	0.39446	4.53636e-05	0.00416745	8.84485e-06	1.24251e-06	9.47727e-06	0.000449676	0.00325052	1.0802e-06	2.01876e-06	4.4057e-05
H18	0.00328955	0.00894513	0.00134357	0.0140814	0.0175792	0.000641911	0.459603	0.000137421	0.0280801	8.05959e-05	0.000105919	2.32653e-05	8.09746e-06	0.000727013	0.00457673	0.00135443	4.53636e-05	0.368369	6.5576e-05	0.00348338	2.18821e-05	3.14103e-05	5.78913e-06	3.98563e-06	4.58935e-06	2.64335e-07	1.37653e-06
H19	0.00122194	0.0147406	0.000783254	0.000450601	0.00331187	0.0180871	0.00221734	0.457775	0.00337794	0.0273838	0.00102454	0.00226009	0.00630982	0.000302547	0.00412034	0.00190937	0.00416745	6.5576e-05	0.380748	8.44872e-05	0.000104402	0.0012239	0.00349278	0.00629032	0.000112384	0.000240921	0.00479249
H20	0.000966959	0.0274318	0.0148535	0.000260415	0.00551752	0.000114559	0.0251983	3.69952e-05	0.464421	9.25262e-06	0.000389087	0.000198715	9.08164e-05	0.000686799	0.000243933	0.000130447	8.84485e-06	0.00348338	8.44872e-05	0.371469	4.23922e-05	0.000246886	2.05937e-06	2.60752e-06	3.04349e-05	7.09662e-06	4.57086e-06
H21	1.06865e-05	0.00890174	0.0274117	5.98934e-06	3.79528e-05	6.95729e-06	0.000349927	2.32887e-05	0.000341378	1.40168e-05	0.46189	0.0194474	0.0104873	1.26991e-05	2.65719e-05	1.00229e-05	1.24251e-06	2.18821e-05	0.000104402	4.23922e-05	0.392735	0.0144937	2.03167e-05	1.82238e-06	0.00104262	0.000743612	0.00046353
H22	8.2639e-05	0.00479201	0.0286358	2.8355e-05	4.28277e-05	0.000102334	0.000522039	0.000743605	0.00206846	0.000172629	0.463083	0.0182838	0.00613128	1.77957e-05	1.10639e-05	0.000104719	9.47727e-06	3.14103e-05	0.0012239	0.000246886	0.0144937	0.394445	1.89522e-05	3.56573e-05	0.00512369	0.0004436	0.00385248
H23	0.000910211	0.000117737	8.96884e-05	0.000538741	7.34341e-05	0.00631039	3.40191e-05	0.0295367	3.76558e-05	0.480263	6.26169e-05	0.000962063	0.0039751	5.44354e-06	8.86352e-05	0.000775406	0.000449676	5.78913e-06	0.00349278	2.05937e-06	2.03167e-05	1.89522e-05	0.403403	0.0165054	4.57193e-05	0.000984138	0.00226745
H24	0.00124718	0.000229694	1.24361e-05	0.000417705	0.000154193	0.00605576	7.89974e-05	0.0299355	9.80437e-05	0.48101	1.59342e-05	2.96925e-05	0.000226515	1.49504e-05	0.000119241	0.000444716	0.00325052	3.98563e-06	0.00629032	2.60752e-06	1.82238e-06	3.56573e-05	0.0165054	0.410495	2.88825e-06	5.21224e-05	0.000251644
H25	4.63637e-06	0.000540478	0.00879519	2.97462e-06	2.4835e-06	6.88509e-06	3.75208e-05	0.000156828	0.000145291	0.000111466	0.0197477	0.471861	0.028732	8.22472e-07	1.01018e-06	7.25239e-06	1.0802e-06	4.58935e-06	0.000112384	3.04349e-05	0.00104262	0.00512369	4.57193e-05	2.88825e-06	0.407477	0.00369483	0.00640626
H26	3.78587e-06	0.000226973	0.00154334	2.50184e-06	2.0674e-06	3.26393e-05	4.44449e-06	0.000239222	1.05169e-05	0.000464233	0.0063096	0.030321	0.48303	1.62553e-07	2.54988e-06	4.19886e-06	2.01876e-06	2.64335e-07	0.000240921	7.09662e-06	0.000743612	0.0004436	0.000984138	5.21224e-05	0.00369483	0.410462	0.0164089
H27	0.000162159	0.000318486	0.00117404	6.47519e-05	1.7238e-05	0.000356306	1.22137e-05	0.00829439	2.75922e-05	0.00668182	0.00600504	0.0292195	0.472186	1.34179e-06	1.96906e-05	6.11427e-05	4.4057e-05	1.37653e-06	0.00479249	4.57086e-06	0.00046353	0.00385248	0.00226745	0.000251644	0.00640626	0.0164089	0.395913
LDM — ajoene_z_13_LIDI_matrix
	S1	S2	S3	O4	C5	C6	C7	C8	C9	C10	C11	C12	C13	H14	H15	H16	H17	H18	H19	H20	H21	H22	H23	H24	H25	H26	H27
S1	12.9214	0.00283973	0.000390443	0.685092	0.464036	0.463338	0.0282323	0.0295725	0.0138205	0.0197999	0.00010221	2.80253e-05	6.91136e-05	0.0185589	0.0227011	0.0224002	0.0243598	0.00330644	0.00121904	0.00096621	8.23024e-05	1.06726e-05	0.0012325	0.000909833	4.60754e-06	0.000161142	3.78389e-06		92.252	31.7476
S2	0.00283973	14.5089	0.650784	0.00151281	0.0153552	0.000804555	0.0642261	0.00529141	0.575752	0.000570768	0.0380747	0.0115628	0.00638754	0.0161285	0.00180319	0.00020608	0.000566298	0.00894189	0.0144811	0.0274628	0.00478735	0.00890328	0.000226467	0.000113929	0.000543851	0.000316156	0.000226976
S3	0.000390443	0.650784	14.6238	0.000355439	0.00191154	8.01715e-05	0.0103807	0.000277858	0.0421712	5.79406e-05	0.529887	0.0399918	0.0190111	0.00162018	0.000220462	1.32795e-05	8.33297e-05	0.00134406	0.00077336	0.0148082	0.0286258	0.0274219	1.21453e-05	8.82116e-05	0.0088176	0.00117442	0.00154351
O4	0.685092	0.00151281	0.000355439	8.36732	0.0622973	0.0629834	0.0133523	0.0101955	0.00278397	0.00657107	2.73392e-05	1.07198e-05	3.15665e-05	0.00805745	0.00432592	0.00390775	0.00730479	0.014138	0.000449377	0.000260629	2.82068e-05	5.94006e-06	0.000415181	0.000539502	2.96442e-06	6.46061e-05	2.53239e-06
C5	0.464036	0.0153552	0.00191154	0.0622973	4.07442	0.0230778	0.518262	0.00822521	0.0349857	0.00225762	0.000129272	3.54415e-05	2.50121e-05	0.457329	0.462071	0.00502472	0.00231921	0.0175751	0.00335554	0.00551848	4.28671e-05	3.78568e-05	0.000153729	7.27329e-05	2.48391e-06	1.70423e-05	2.06742e-06
C6	0.463338	0.000804555	8.01715e-05	0.0629834	0.0230778	4.07111	0.00953034	0.520307	0.00325752	0.037508	4.10716e-05	7.6819e-05	0.000306566	0.00139329	0.00497987	0.465113	0.458109	0.000655602	0.0181083	0.000115334	0.000102647	7.04033e-06	0.00605874	0.00631071	6.87872e-06	0.00035754	3.24151e-05
C7	0.0282323	0.0642261	0.0103807	0.0133523	0.518262	0.00953034	3.9633	0.00195459	0.880858	0.000460305	0.00185125	0.000343591	0.000156679	0.0169417	0.0193737	0.000899035	0.00994856	0.459541	0.00221239	0.0252003	0.000523114	0.000351344	7.89835e-05	3.4012e-05	3.75045e-05	1.21891e-05	4.44422e-06
C8	0.0295725	0.00529141	0.000277858	0.0101955	0.00822521	0.520307	0.00195459	3.98477	0.00170763	0.913598	0.000318095	0.000925941	0.00478055	0.00811669	0.000797859	0.018172	0.0177974	0.000137888	0.457915	3.65038e-05	0.00074816	2.33528e-05	0.0298911	0.0295362	0.00015638	0.0082592	0.000238208
C9	0.0138205	0.575752	0.0421712	0.00278397	0.0349857	0.00325752	0.880858	0.00170763	4.11041	0.000211308	0.00269446	0.000644652	0.000210898	0.00384826	0.0103259	0.000233941	0.0045013	0.0280606	0.00333914	0.464459	0.0020661	0.000341958	9.68288e-05	3.71864e-05	0.000145349	2.74873e-05	1.05238e-05
C10	0.0197999	0.000570768	5.79406e-05	0.00657107	0.00225762	0.037508	0.000460305	0.913598	0.000211308	4.08311	8.03777e-05	0.000563665	0.00389395	0.00261445	0.000126158	0.00673333	0.00725143	8.09326e-05	0.0274153	9.13697e-06	0.000175091	1.40113e-05	0.480987	0.48028	0.000112259	0.00671945	0.000460301
C11	0.00010221	0.0380747	0.529887	2.73392e-05	0.000129272	4.10716e-05	0.00185125	0.000318095	0.00269446	8.03777e-05	4.0154	0.515967	0.0369704	8.64906e-05	5.28336e-05	7.788e-06	7.20097e-05	0.000105911	0.00102332	0.000385711	0.462992	0.461904	1.59125e-05	6.21092e-05	0.0197321	0.00600577	0.00631
C12	2.80253e-05	0.0115628	0.0399918	1.07198e-05	3.54415e-05	7.6819e-05	0.000343591	0.000925941	0.000644652	0.000563665	0.515967	3.97116	0.918654	3.19996e-05	1.09119e-05	2.60131e-05	2.45542e-05	2.31682e-05	0.0022528	0.000198984	0.018256	0.0194438	2.92447e-05	0.000955166	0.471832	0.0292083	0.0303145
C13	6.91136e-05	0.00638754	0.0190111	3.15665e-05	2.50121e-05	0.000306566	0.000156679	0.00478055	0.000210898	0.00389395	0.0369704	0.918654	4.0824	3.26605e-05	4.49834e-06	6.84727e-05	4.52475e-05	8.05403e-06	0.00630449	9.08033e-05	0.00613214	0.0105006	0.000225424	0.00397084	0.0287419	0.472212	0.483066
H14	0.0185589	0.0161285	0.00162018	0.00805745	0.457329	0.00139329	0.0169417	0.00811669	0.00384826	0.00261445	8.64906e-05	3.19996e-05	3.26605e-05	0.380631	0.0143076	0.00017637	0.000125192	0.00457108	0.00418632	0.000244866	1.11885e-05	2.62957e-05	0.000119742	8.79599e-05	1.00615e-06	1.95571e-05	2.55737e-06
H15	0.0227011	0.00180319	0.000220462	0.00432592	0.462071	0.00497987	0.0193737	0.000797859	0.0103259	0.000126158	5.28336e-05	1.09119e-05	4.49834e-06	0.0143076	0.385217	0.000921701	0.000184508	0.000720434	0.000306089	0.000686662	1.79171e-05	1.27649e-05	1.51572e-05	5.50409e-06	8.26387e-07	1.34947e-06	1.638e-07
H16	0.0224002	0.00020608	1.32795e-05	0.00390775	0.00502472	0.465113	0.000899035	0.018172	0.000233941	0.00673333	7.788e-06	2.60131e-05	6.84727e-05	0.00017637	0.000921701	0.394449	0.0143577	4.58921e-05	0.00418185	8.85058e-06	9.51054e-06	1.25328e-06	0.00326178	0.000449358	1.09308e-06	4.45318e-05	2.01071e-06
H17	0.0243598	0.000566298	8.33297e-05	0.00730479	0.00231921	0.458109	0.00994856	0.0177974	0.0045013	0.00725143	7.20097e-05	2.45542e-05	4.52475e-05	0.000125192	0.000184508	0.0143577	0.378469	0.00137635	0.00189955	0.000130768	0.000104346	1.00689e-05	0.000445089	0.000774794	7.20688e-06	6.14509e-05	4.125e-06
H18	0.00330644	0.00894189	0.00134406	0.014138	0.0175751	0.000655602	0.459541	0.000137888	0.0280606	8.09326e-05	0.000105911	2.31682e-05	8.05403e-06	0.00457108	0.000720434	4.58921e-05	0.00137635	0.368275	6.58164e-05	0.00348149	3.14121e-05	2.19406e-05	4.00354e-06	5.85544e-06	4.59223e-06	1.37637e-06	2.64506e-07
H19	0.00121904	0.0144811	0.00077336	0.000449377	0.00335554	0.0181083	0.00221239	0.457915	0.00333914	0.0274153	0.00102332	0.0022528	0.00630449	0.00418632	0.000306089	0.00418185	0.00189955	6.58164e-05	0.381064	8.36209e-05	0.00122528	0.000104425	0.00629456	0.00349503	0.000112544	0.00479458	0.000240443
H20	0.00096621	0.0274628	0.0148082	0.000260629	0.00551848	0.000115334	0.0252003	3.65038e-05	0.464459	9.13697e-06	0.000385711	0.000198984	9.08033e-05	0.000244866	0.000686662	8.85058e-06	0.000130768	0.00348149	8.36209e-05	0.371513	0.000243416	4.19299e-05	2.57466e-06	2.00778e-06	3.03395e-05	4.55139e-06	7.09687e-06
H21	8.23024e-05	0.00478735	0.0286258	2.82068e-05	4.28671e-05	0.000102647	0.000523114	0.00074816	0.0020661	0.000175091	0.462992	0.018256	0.00613214	1.11885e-05	1.79171e-05	9.51054e-06	0.000104346	3.14121e-05	0.00122528	0.000243416	0.394433	0.0144922	3.57462e-05	1.91399e-05	0.00512213	0.00385223	0.000443796
H22	1.06726e-05	0.00890328	0.0274219	5.94006e-06	3.78568e-05	7.04033e-06	0.000351344	2.33528e-05	0.000341958	1.40113e-05	0.461904	0.0194438	0.0105006	2.62957e-05	1.27649e-05	1.25328e-06	1.00689e-05	2.19406e-05	0.000104425	4.19299e-05	0.0144922	0.392708	1.80148e-06	2.00778e-05	0.001038	0.000463627	0.000743184
H23	0.0012325	0.000226467	1.21453e-05	0.000415181	0.000153729	0.00605874	7.89835e-05	0.0298911	9.68288e-05	0.480987	1.59125e-05	2.92447e-05	0.000225424	0.000119742	1.51572e-05	0.00326178	0.000445089	4.00354e-06	0.00629456	2.57466e-06	3.57462e-05	1.80148e-06	0.410468	0.0165024	2.90284e-06	0.000254134	5.16745e-05
H24	0.000909833	0.000113929	8.82116e-05	0.000539502	7.27329e-05	0.00631071	3.4012e-05	0.0295362	3.71864e-05	0.48028	6.21092e-05	0.000955166	0.00397084	8.79599e-05	5.50409e-06	0.000449358	0.000774794	5.85544e-06	0.00349503	2.00778e-06	1.91399e-05	2.00778e-05	0.0165024	0.403404	4.64741e-05	0.00232102	0.00097374
H25	4.60754e-06	0.000543851	0.0088176	2.96442e-06	2.48391e-06	6.87872e-06	3.75045e-05	0.00015638	0.000145349	0.000112259	0.0197321	0.471832	0.0287419	1.00615e-06	8.26387e-07	1.09308e-06	7.20688e-06	4.59223e-06	0.000112544	3.03395e-05	0.00512213	0.001038	2.90284e-06	4.64741e-05	0.407432	0.00640555	0.00369495
H26	0.000161142	0.000316156	0.00117442	6.46061e-05	1.70423e-05	0.00035754	1.21891e-05	0.0082592	2.74873e-05	0.00671945	0.00600577	0.0292083	0.472212	1.95571e-05	1.34947e-06	4.45318e-05	6.14509e-05	1.37637e-06	0.00479458	4.55139e-06	0.00385223	0.000463627	0.000254134	0.00232102	0.00640555	0.395977	0.0164119
H27	3.78389e-06	0.000226976	0.00154351	2.53239e-06	2.06742e-06	3.24151e-05	4.44422e-06	0.000238208	1.05238e-05	0.000460301	0.00631	0.0303145	0.483066	2.55737e-06	1.638e-07	2.01071e-06	4.125e-06	2.64506e-07	0.000240443	7.09687e-06	0.000443796	0.000743184	5.16745e-05	0.00097374	0.00369495	0.0164119	0.41046
LDM — ajoene_z_14_LIDI_matrix
	S1	S2	S3	O4	C5	C6	C7	C8	C9	C10	C11	C12	C13	H14	H15	H16	H17	H18	H19	H20	H21	H22	H23	H24	H25	H26	H27
S1	12.9493	0.00313982	0.0011224	0.68024	0.465767	0.465281	0.0288804	0.0277	0.0129536	0.0172826	0.00100012	0.000111705	0.000332287	0.0211017	0.0221921	0.0201111	0.0228454	0.00592922	0.00175979	0.000735606	0.00174433	0.000191038	0.00128342	0.000812052	5.01378e-05	3.25974e-05	0.00077841		92.288	31.7104
S2	0.00313982	14.5729	0.641427	0.000908627	0.0179846	0.00023448	0.0504034	0.000536188	0.568997	0.00149112	0.0390272	0.00953185	0.00437802	0.0226804	0.00123029	3.00192e-05	6.71973e-05	0.00891747	5.17242e-05	0.029711	0.00423966	0.00710274	0.000117686	6.17122e-05	0.000460854	0.000467907	0.000195929
S3	0.0011224	0.641427	14.6482	0.00181923	0.00173825	0.000145612	0.0213696	0.000651724	0.0466541	0.000565081	0.527061	0.0390333	0.0186132	0.00104135	0.00073801	2.53887e-05	3.49924e-05	0.00161649	0.000691639	0.00439267	0.0246829	0.0298764	0.000274359	1.98417e-05	0.00528669	0.0011797	0.000907773
O4	0.68024	0.000908627	0.00181923	8.32731	0.0604555	0.0608255	0.0143736	0.0136473	0.00490819	0.00291779	0.012683	0.00111104	0.00470092	0.00279442	0.00823409	0.00831129	0.00326968	0.00167574	0.00943149	0.000168582	0.0282227	0.000553222	0.000252429	0.000425737	0.000502754	0.000402374	0.00941844
C5	0.465767	0.0179846	0.00173825	0.0604555	4.08008	0.0248272	0.518077	0.00744352	0.034085	0.00466543	0.00138894	0.000135306	5.69024e-05	0.444544	0.464599	0.00428129	0.00481366	0.0192217	0.000196428	0.00544032	0.00223463	0.00017152	0.000150079	0.000387582	4.57577e-05	4.15778e-06	7.2037e-05
C6	0.465281	0.00023448	0.000145612	0.0608255	0.0248272	4.06645	0.00454261	0.517106	0.0015647	0.037465	0.000193082	6.96375e-05	6.56114e-05	0.00409908	0.00265767	0.465629	0.464899	0.000344774	0.0184212	0.000164983	0.000169968	0.000209983	0.00632429	0.00625431	2.92791e-06	1.60527e-06	4.21929e-05
C7	0.0288804	0.0504034	0.0213696	0.0143736	0.518077	0.00454261	3.95172	0.000666086	0.885081	0.000468164	0.00155916	0.000434636	0.000360798	0.0160811	0.0194002	0.000514225	0.00099414	0.468657	2.25564e-05	0.0271294	0.00231236	0.000118092	1.46194e-05	5.89654e-05	9.30989e-05	2.68121e-05	2.2301e-05
C8	0.0277	0.000536188	0.000651724	0.0136473	0.00744352	0.517106	0.000666086	3.97117	0.000149222	0.912284	0.00450079	0.000673489	0.000515838	0.010524	0.000423112	0.0176816	0.0190001	0.00023467	0.462538	1.47879e-05	0.0025391	0.00449352	0.0295999	0.0303721	3.161e-05	1.14431e-05	8.75769e-05
C9	0.0129536	0.568997	0.0466541	0.00490819	0.034085	0.0015647	0.885081	0.000149222	4.07623	0.000208755	0.0034845	0.000570964	0.000183485	0.00388211	0.0102819	0.00018574	0.00053121	0.0290844	1.31477e-05	0.468842	0.00285146	0.000431463	1.4085e-05	1.31504e-05	0.000149754	1.71022e-05	2.08591e-05
C10	0.0172826	0.00149112	0.000565081	0.00291779	0.00466543	0.037465	0.000468164	0.912284	0.000208755	4.07541	0.00292688	0.000241393	0.000174718	0.00990485	0.000256831	0.00597853	0.00962863	0.000251323	0.0269944	4.30131e-05	0.00087567	0.00562725	0.481281	0.481141	1.42377e-05	1.20974e-05	1.81906e-05
C11	0.00100012	0.0390272	0.527061	0.012683	0.00138894	0.000193082	0.00155916	0.00450079	0.0034845	0.00292688	4.02865	0.515935	0.0375657	0.00211615	0.000119846	5.06498e-05	2.35091e-05	8.86822e-05	0.00325475	0.000340497	0.438033	0.460658	0.000974893	8.56655e-05	0.0200438	0.00634303	0.00561249
C12	0.000111705	0.00953185	0.0390333	0.00111104	0.000135306	6.96375e-05	0.000434636	0.000673489	0.000570964	0.000241393	0.515935	3.98477	0.921139	0.000224312	3.87826e-05	2.76834e-05	6.43403e-06	2.12033e-05	0.00171549	5.16139e-05	0.0160925	0.0193366	7.28099e-05	2.10748e-05	0.47541	0.0307305	0.0287137
C13	0.000332287	0.00437802	0.0186132	0.00470092	5.69024e-05	6.56114e-05	0.000360798	0.000515838	0.000183485	0.000174718	0.0375657	0.921139	4.08734	6.47431e-05	1.42384e-05	2.40606e-05	5.33829e-06	1.75612e-05	0.00163029	1.8041e-05	0.00579897	0.00977907	6.53517e-05	2.94551e-05	0.0300436	0.484954	0.472659
H14	0.0211017	0.0226804	0.00104135	0.00279442	0.444544	0.00409908	0.0160811	0.010524	0.00388211	0.00990485	0.00211615	0.000224312	6.47431e-05	0.348699	0.0135346	0.000411524	0.000296076	0.00454228	0.000229358	0.000304682	0.001947	0.000630236	0.000246396	0.000831391	5.01873e-05	4.17762e-06	8.35047e-06
H15	0.0221921	0.00123029	0.00073801	0.00823409	0.464599	0.00265767	0.0194002	0.000423112	0.0102819	0.000256831	0.000119846	3.87826e-05	1.42384e-05	0.0135346	0.39863	0.00251826	0.000210205	0.000911031	6.83697e-05	0.000665619	0.000224569	1.40566e-05	1.12419e-05	8.71733e-05	7.41854e-06	2.2671e-06	1.82734e-05
H16	0.0201111	3.00192e-05	2.53887e-05	0.00831129	0.00428129	0.465629	0.000514225	0.0176816	0.00018574	0.00597853	5.06498e-05	2.76834e-05	2.40606e-05	0.000411524	0.00251826	0.400561	0.0148547	2.3601e-05	0.0048728	2.56441e-05	3.37779e-05	3.76668e-05	0.000439206	0.00384818	1.07667e-06	2.89216e-07	1.30206e-05
H17	0.0228454	6.71973e-05	3.49924e-05	0.00326968	0.00481366	0.464899	0.00099414	0.0190001	0.00053121	0.00962863	2.35091e-05	6.43403e-06	5.33829e-06	0.000296076	0.000210205	0.0148547	0.391227	1.4216e-05	0.00117644	6.11168e-05	1.1504e-05	4.84889e-05	0.00077846	0.000473478	3.76148e-07	3.13899e-07	2.20818e-06
H18	0.00592922	0.00891747	0.00161649	0.00167574	0.0192217	0.000344774	0.468657	0.00023467	0.0290844	0.000251323	8.86822e-05	2.12033e-05	1.75612e-05	0.00454228	0.000911031	2.3601e-05	1.4216e-05	0.400863	5.3634e-06	0.00359245	7.03243e-05	1.52458e-05	1.10053e-05	1.62351e-05	6.89481e-06	1.48106e-06	1.85461e-06
H19	0.00175979	5.17242e-05	0.000691639	0.00943149	0.000196428	0.0184212	2.25564e-05	0.462538	1.31477e-05	0.0269944	0.00325475	0.00171549	0.00163029	0.000229358	6.83697e-05	0.0048728	0.00117644	5.3634e-06	0.377435	8.41149e-07	0.00187331	0.00140454	0.00346906	0.006407	4.32158e-05	4.53132e-05	0.000277926
H20	0.000735606	0.029711	0.00439267	0.000168582	0.00544032	0.000164983	0.0271294	1.47879e-05	0.468842	4.30131e-05	0.000340497	5.16139e-05	1.8041e-05	0.000304682	0.000665619	2.56441e-05	6.11168e-05	0.00359245	8.41149e-07	0.38289	6.58734e-05	0.000138239	2.72154e-06	2.28652e-06	4.60293e-06	3.22564e-06	1.60907e-06
H21	0.00174433	0.00423966	0.0246829	0.0282227	0.00223463	0.000169968	0.00231236	0.0025391	0.00285146	0.00087567	0.438033	0.0160925	0.00579897	0.001947	0.000224569	3.37779e-05	1.1504e-05	7.03243e-05	0.00187331	6.58734e-05	0.335854	0.0133662	8.59616e-05	4.3211e-05	0.00439721	0.000402606	0.00304329
H22	0.000191038	0.00710274	0.0298764	0.000553222	0.00017152	0.000209983	0.000118092	0.00449352	0.000431463	0.00562725	0.460658	0.0193366	0.00977907	0.000630236	1.40566e-05	3.76668e-05	4.84889e-05	1.52458e-05	0.00140454	0.000138239	0.0133662	0.398194	0.00219802	0.000210959	0.00131276	0.000806924	0.000459335
H23	0.00128342	0.000117686	0.000274359	0.000252429	0.000150079	0.00632429	1.46194e-05	0.0295999	1.4085e-05	0.481281	0.000974893	7.28099e-05	6.53517e-05	0.000246396	1.12419e-05	0.000439206	0.00077846	1.10053e-05	0.00346906	2.72154e-06	8.59616e-05	0.00219802	0.404211	0.0167138	4.1962e-06	5.6967e-06	3.79479e-06
H24	0.000812052	6.17122e-05	1.98417e-05	0.000425737	0.000387582	0.00625431	5.89654e-05	0.0303721	1.31504e-05	0.481141	8.56655e-05	2.10748e-05	2.94551e-05	0.000831391	8.71733e-05	0.00384818	0.000473478	1.62351e-05	0.006407	2.28652e-06	4.3211e-05	0.000210959	0.0167138	0.41499	9.55287e-07	5.18251e-07	5.48377e-06
H25	5.01378e-05	0.000460854	0.00528669	0.000502754	4.57577e-05	2.92791e-06	9.30989e-05	3.161e-05	0.000149754	1.42377e-05	0.0200438	0.47541	0.0300436	5.01873e-05	7.41854e-06	1.07667e-06	3.76148e-07	6.89481e-06	4.32158e-05	4.60293e-06	0.00439721	0.00131276	4.1962e-06	9.55287e-07	0.418269	0.003657	0.00637244
H26	3.25974e-05	0.000467907	0.0011797	0.000402374	4.15778e-06	1.60527e-06	2.68121e-05	1.14431e-05	1.71022e-05	1.20974e-05	0.00634303	0.0307305	0.484954	4.17762e-06	2.2671e-06	2.89216e-07	3.13899e-07	1.48106e-06	4.53132e-05	3.22564e-06	0.000402606	0.000806924	5.6967e-06	5.18251e-07	0.003657	0.416471	0.0159908
H27	0.00077841	0.000195929	0.000907773	0.00941844	7.2037e-05	4.21929e-05	2.2301e-05	8.75769e-05	2.08591e-05	1.81906e-05	0.00561249	0.0287137	0.472659	8.35047e-06	1.82734e-05	1.30206e-05	2.20818e-06	1.85461e-06	0.000277926	1.60907e-06	0.00304329	0.000459335	3.79479e-06	5.48377e-06	0.00637244	0.0159908	0.380257
LDM — ajoene_z_15_LIDI_matrix
	S1	S2	S3	O4	C5	C6	C7	C8	C9	C10	C11	C12	C13	H14	H15	H16	H17	H18	H19	H20	H21	H22	H23	H24	H25	H26	H27
S1	12.9275	0.00237189	0.000899828	0.685062	0.465269	0.467177	0.0285859	0.0273956	0.0142095	0.013528	6.49888e-05	9.20091e-05	0.000294939	0.02293	0.0183188	0.0238387	0.0228999	0.00304164	0.00504129	0.00121802	7.13405e-05	1.71634e-05	0.000841256	0.000943164	9.31427e-06	9.60574e-06	0.000561009		92.263	31.7369
S2	0.00237189	14.5068	0.6409	0.001397	0.0159751	0.000615855	0.0555037	0.00501357	0.570977	0.0173637	0.0373656	0.0162848	0.0123291	0.00142775	0.0176149	0.000526204	0.000157968	0.00857337	0.000279964	0.0292219	0.003558	0.00866693	0.0119224	0.00111159	0.000576456	0.000344846	0.00101591
S3	0.000899828	0.6409	14.6402	0.000407758	0.00169952	0.000166078	0.0176232	0.000871404	0.0445194	0.00162353	0.52813	0.0400032	0.0223751	0.000512658	0.00126008	0.000177621	3.81903e-05	0.00147972	4.56692e-05	0.00895166	0.0290893	0.0267785	0.00072529	8.46737e-05	0.00669949	0.00155164	0.00131791
O4	0.685062	0.001397	0.000407758	8.37029	0.0619774	0.0626745	0.0140759	0.00941741	0.00282332	0.00506302	2.39264e-05	4.61718e-05	0.000146266	0.00420617	0.00784724	0.0053731	0.00532233	0.0142401	0.000845611	0.000275778	1.64622e-05	5.34454e-06	0.000294102	0.000606215	4.53835e-06	4.20796e-06	0.00019932
C5	0.465269	0.0159751	0.00169952	0.0619774	4.07542	0.0233532	0.517412	0.00727104	0.0338383	0.00364057	0.000231816	0.00056928	0.00277697	0.460373	0.454173	0.00297787	0.00478858	0.0176862	0.000363887	0.00544486	0.000232345	3.16056e-05	0.00018073	0.000109467	7.28119e-05	0.000109722	0.00454817
C6	0.467177	0.000615855	0.000166078	0.0626745	0.0233532	4.07186	0.00860541	0.519776	0.00337932	0.0370451	2.05028e-05	9.49696e-06	4.14651e-05	0.00496039	0.00159903	0.456912	0.46253	0.000398728	0.0198524	0.000109752	2.45857e-05	3.85266e-06	0.00594691	0.00629739	2.56711e-06	2.40472e-06	0.000127994
C7	0.0285859	0.0555037	0.0176232	0.0140759	0.517412	0.00860541	3.96306	0.00120073	0.878916	0.00118208	0.00223769	0.000321379	0.000560246	0.0199314	0.0163979	0.0104019	0.000741207	0.459585	0.000170379	0.0261748	0.00337725	0.000362389	0.000963328	7.14555e-05	9.84197e-05	4.15329e-05	0.000757463
C8	0.0273956	0.00501357	0.000871404	0.00941741	0.00727104	0.519776	0.00120073	3.98499	0.000762588	0.91405	4.60717e-05	1.0472e-05	1.46409e-05	0.00074659	0.00779548	0.0171829	0.0189514	0.000121807	0.473863	2.15994e-05	4.2487e-06	3.21902e-05	0.029085	0.0298802	5.62306e-07	1.0982e-06	8.51154e-06
C9	0.0142095	0.570977	0.0445194	0.00282332	0.0338383	0.00337932	0.878916	0.000762588	4.09731	0.00224475	0.00496845	0.000746428	0.000466741	0.0101992	0.00346731	0.00584467	0.000252321	0.0276044	0.000142957	0.46713	0.00574077	0.000545786	0.00244491	0.000201416	0.000166949	2.1571e-05	0.000408543
C10	0.013528	0.0173637	0.00162353	0.00506302	0.00364057	0.0370451	0.00118208	0.91405	0.00224475	4.06997	0.000129919	2.27459e-05	2.77477e-05	0.000224652	0.00526464	0.00579657	0.0103843	7.25212e-05	0.0296208	8.8091e-05	8.74852e-06	6.40369e-05	0.473834	0.482254	1.19263e-06	1.88952e-06	1.45841e-05
C11	6.49888e-05	0.0373656	0.52813	2.39264e-05	0.000231816	2.05028e-05	0.00223769	4.60717e-05	0.00496845	0.000129919	4.01277	0.517233	0.0368741	0.000118563	0.000166147	2.37992e-05	3.09877e-06	0.000101683	4.21219e-06	0.000317355	0.461051	0.463595	0.000200051	7.7518e-06	0.0197585	0.00625966	0.00633905
C12	9.20091e-05	0.0162848	0.0400032	4.61718e-05	0.00056928	9.49696e-06	0.000321379	1.0472e-05	0.000746428	2.27459e-05	0.517233	3.96281	0.915505	0.000328033	0.000895248	3.81985e-06	3.3772e-06	1.57472e-05	9.21227e-07	0.000210208	0.0182724	0.0191526	1.8778e-05	1.50738e-06	0.472775	0.0300773	0.0300645
C13	0.000294939	0.0123291	0.0223751	0.000146266	0.00277697	4.14651e-05	0.000560246	1.46409e-05	0.000466741	2.77477e-05	0.0368741	0.915505	4.07713	0.00234817	0.00239377	6.21235e-06	1.40304e-05	4.23567e-05	8.89262e-07	0.000122215	0.00629133	0.00922381	1.70494e-05	1.15314e-06	0.0288769	0.483643	0.477459
H14	0.02293	0.00142775	0.000512658	0.00420617	0.460373	0.00496039	0.0199314	0.00074659	0.0101992	0.000224652	0.000118563	0.000328033	0.00234817	0.389235	0.0137187	0.000213106	0.000959958	0.000846061	2.0606e-05	0.000534607	0.000109618	1.56842e-05	2.36589e-05	6.6019e-06	0.000128729	0.000146394	0.00447281
H15	0.0183188	0.0176149	0.00126008	0.00784724	0.454173	0.00159903	0.0163979	0.00779548	0.00346731	0.00526464	0.000166147	0.000895248	0.00239377	0.0137187	0.364774	9.43249e-05	0.000193329	0.00451823	0.000331488	0.000242051	1.40346e-05	3.91448e-05	0.000161987	0.000132171	3.06733e-05	8.26939e-05	0.00104259
H16	0.0238387	0.000526204	0.000177621	0.0053731	0.00297787	0.456912	0.0104019	0.0171829	0.00584467	0.00579657	2.37992e-05	3.81985e-06	6.21235e-06	0.000213106	9.43249e-05	0.379426	0.0141234	0.000888727	0.00502001	0.000147603	2.71404e-05	3.86282e-06	0.00355643	0.00041177	8.54862e-07	2.85324e-07	1.02064e-05
H17	0.0228999	0.000157968	3.81903e-05	0.00532233	0.00478858	0.46253	0.000741207	0.0189514	0.000252321	0.0103843	3.09877e-06	3.3772e-06	1.40304e-05	0.000959958	0.000193329	0.0141234	0.388306	2.64471e-05	0.00115899	9.11579e-06	3.09224e-06	1.24336e-06	0.000474055	0.000769219	8.23976e-07	1.00007e-06	4.17266e-05
H18	0.00304164	0.00857337	0.00147972	0.0142401	0.0176862	0.000398728	0.459585	0.000121807	0.0276044	7.25212e-05	0.000101683	1.57472e-05	4.23567e-05	0.000846061	0.00451823	0.000888727	2.64471e-05	0.368566	2.89837e-05	0.00340676	9.15148e-05	1.62979e-05	3.0078e-05	6.29344e-06	4.09805e-06	1.3469e-06	2.05858e-05
H19	0.00504129	0.000279964	4.56692e-05	0.000845611	0.000363887	0.0198524	0.000170379	0.473863	0.000142957	0.0296208	4.21219e-06	9.21227e-07	8.89262e-07	2.0606e-05	0.000331488	0.00502001	0.00115899	2.89837e-05	0.411079	4.98593e-06	9.78028e-07	2.07672e-06	0.00655955	0.00368888	4.82098e-08	6.37657e-08	4.67333e-07
H20	0.00121802	0.0292219	0.00895166	0.000275778	0.00544486	0.000109752	0.0261748	2.15994e-05	0.46713	8.8091e-05	0.000317355	0.000210208	0.000122215	0.000534607	0.000242051	0.000147603	9.11579e-06	0.00340676	4.98593e-06	0.379414	0.000212119	1.83274e-05	4.76222e-05	1.31402e-05	1.69226e-05	5.58894e-06	1.32177e-05
H21	7.13405e-05	0.003558	0.0290893	1.64622e-05	0.000232345	2.45857e-05	0.00337725	4.2487e-06	0.00574077	8.74852e-06	0.461051	0.0182724	0.00629133	0.000109618	1.40346e-05	2.71404e-05	3.09224e-06	9.15148e-05	9.78028e-07	0.000212119	0.392061	0.0145402	1.13403e-05	7.04382e-07	0.00509125	0.000457857	0.00424577
H22	1.71634e-05	0.00866693	0.0267785	5.34454e-06	3.16056e-05	3.85266e-06	0.000362389	3.21902e-05	0.000545786	6.40369e-05	0.463595	0.0191526	0.00922381	1.56842e-05	3.91448e-05	3.86282e-06	1.24336e-06	1.62979e-05	2.07672e-06	1.83274e-05	0.0145402	0.395563	6.53181e-05	3.68587e-06	0.0013875	0.000786784	0.000499287
H23	0.000841256	0.0119224	0.00072529	0.000294102	0.00018073	0.00594691	0.000963328	0.029085	0.00244491	0.473834	0.000200051	1.8778e-05	1.70494e-05	2.36589e-05	0.000161987	0.00355643	0.000474055	3.0078e-05	0.00655955	4.76222e-05	1.13403e-05	6.53181e-05	0.397371	0.0162296	5.69153e-07	4.68269e-07	2.72075e-06
H24	0.000943164	0.00111159	8.46737e-05	0.000606215	0.000109467	0.00629739	7.14555e-05	0.0298802	0.000201416	0.482254	7.7518e-06	1.50738e-06	1.15314e-06	6.6019e-06	0.000132171	0.00041177	0.000769219	6.29344e-06	0.00368888	1.31402e-05	7.04382e-07	3.68587e-06	0.0162296	0.405472	8.3032e-08	8.14566e-08	5.61637e-07
H25	9.31427e-06	0.000576456	0.00669949	4.53835e-06	7.28119e-05	2.56711e-06	9.84197e-05	5.62306e-07	0.000166949	1.19263e-06	0.0197585	0.472775	0.0288769	0.000128729	3.06733e-05	8.54862e-07	8.23976e-07	4.09805e-06	4.82098e-08	1.69226e-05	0.00509125	0.0013875	5.69153e-07	8.3032e-08	0.409706	0.00359864	0.00662962
H26	9.60574e-06	0.000344846	0.00155164	4.20796e-06	0.000109722	2.40472e-06	4.15329e-05	1.0982e-06	2.1571e-05	1.88952e-06	0.00625966	0.0300773	0.483643	0.000146394	8.26939e-05	2.85324e-07	1.00007e-06	1.3469e-06	6.37657e-08	5.58894e-06	0.000457857	0.000786784	4.68269e-07	8.14566e-08	0.00359864	0.40996	0.0167732
H27	0.000561009	0.00101591	0.00131791	0.00019932	0.00454817	0.000127994	0.000757463	8.51154e-06	0.000408543	1.45841e-05	0.00633905	0.0300645	0.477459	0.00447281	0.00104259	1.02064e-05	4.17266e-05	2.05858e-05	4.67333e-07	1.32177e-05	0.00424577	0.000499287	2.72075e-06	5.61637e-07	0.00662962	0.0167732	0.41197
LDM — ajoene_z_16_LIDI_matrix
	S1	S2	S3	O4	C5	C6	C7	C8	C9	C10	C11	C12	C13	H14	H15	H16	H17	H18	H19	H20	H21	H22	H23	H24	H25	H26	H27
S1	12.9235	0.00268355	0.000795427	0.684723	0.463467	0.463973	0.0286278	0.0299203	0.0146454	0.0201998	6.83338e-05	3.71419e-05	1.286e-05	0.0181127	0.0226092	0.0243724	0.0226358	0.00316573	0.00125825	0.000902379	7.76281e-06	1.27364e-05	0.000907052	0.00134242	4.90707e-06	4.69431e-06	2.08166e-06		92.2806	31.7206
S2	0.00268355	14.5224	0.646314	0.00150839	0.0166825	0.000701598	0.0580919	0.00606801	0.572037	0.000622612	0.0384371	0.00994297	0.00942382	0.0192072	0.00145445	0.000475766	0.000181373	0.00871188	0.015639	0.0276918	0.00830179	0.00708403	0.000126039	0.000254027	0.000572857	0.00331679	0.00031625
S3	0.000795427	0.646314	14.637	0.000258101	0.00155229	0.000344693	0.0174248	0.00187424	0.0431982	0.000322244	0.527808	0.0405195	0.0228332	0.000908427	0.000514319	0.000460992	5.01304e-05	0.00148286	0.00508756	0.00595261	0.0268479	0.0290968	7.41198e-05	7.70387e-05	0.00587803	0.00135375	0.00151293
O4	0.684723	0.00150839	0.000258101	8.36952	0.062286	0.0626798	0.0138912	0.0102261	0.0028619	0.00653804	4.9221e-05	1.0963e-05	5.1329e-06	0.00785388	0.004235	0.00678441	0.0041398	0.0144307	0.000491921	0.000222291	1.34352e-05	6.36689e-06	0.000516118	0.000430085	3.34017e-06	2.33976e-06	1.09859e-06
C5	0.463467	0.0166825	0.00155229	0.062286	4.07644	0.0230154	0.518989	0.00762493	0.0342107	0.00219691	0.000268445	0.000158312	0.000133287	0.455872	0.462971	0.00241333	0.00503113	0.0176016	0.00287561	0.00527314	6.92083e-05	2.03459e-05	7.03529e-05	0.000147884	1.98943e-05	1.14126e-05	6.20098e-06
C6	0.463973	0.000701598	0.000344693	0.0626798	0.0230154	4.07119	0.00917867	0.519564	0.00350409	0.037709	1.18397e-05	4.405e-06	5.5435e-06	0.00140467	0.0049663	0.458174	0.464753	0.000502126	0.0186113	0.000112882	1.33513e-06	3.67001e-06	0.00637458	0.00615107	4.74558e-07	1.06376e-06	4.95064e-07
C7	0.0286278	0.0580919	0.0174248	0.0138912	0.518989	0.00917867	3.96061	0.00148402	0.880644	0.000418767	0.000775618	0.000454531	0.000500087	0.0168997	0.0196839	0.009858	0.000887603	0.459253	0.00146575	0.0253915	0.000219424	0.000189431	3.22443e-05	6.6087e-05	3.32741e-05	8.79776e-05	4.19282e-05
C8	0.0299203	0.00606801	0.00187424	0.0102261	0.00762493	0.519564	0.00148402	3.98314	0.00135982	0.91758	9.11931e-05	2.6493e-05	2.50215e-05	0.0077073	0.000723689	0.017651	0.018139	0.000129458	0.462961	3.97579e-05	4.52731e-06	2.82177e-05	0.0299699	0.0301761	2.33613e-06	4.64632e-06	8.74179e-07
C9	0.0146454	0.572037	0.0431982	0.0028619	0.0342107	0.00350409	0.880644	0.00135982	4.1002	0.000183846	0.00200039	0.00455887	0.00404628	0.0037056	0.0100808	0.00524572	0.000262398	0.0277477	0.00249598	0.462351	0.000470186	0.0003562	3.39602e-05	8.00667e-05	0.000406466	0.000197083	0.000124026
C10	0.0201998	0.000622612	0.000322244	0.00653804	0.00219691	0.037709	0.000418767	0.91758	0.000183846	4.08293	2.15163e-05	3.36242e-06	3.44096e-06	0.00249131	0.000125842	0.00698792	0.00693446	7.79227e-05	0.0283025	8.61097e-06	1.34635e-06	3.70416e-06	0.483287	0.48135	3.24308e-07	6.49913e-07	1.82383e-07
C11	6.83338e-05	0.0384371	0.527808	4.9221e-05	0.000268445	1.18397e-05	0.000775618	9.11931e-05	0.00200039	2.15163e-05	4.01098	0.517274	0.0364628	0.000286231	2.08426e-05	2.10281e-05	1.67044e-06	9.79528e-05	0.000443105	0.000566809	0.464122	0.463025	6.27362e-06	3.25206e-06	0.0199281	0.00626746	0.00628374
C12	3.71419e-05	0.00994297	0.0405195	1.0963e-05	0.000158312	4.405e-06	0.000454531	2.6493e-05	0.00455887	3.36242e-06	0.517274	3.97001	0.913098	3.37088e-05	1.84799e-05	4.93305e-06	8.12447e-07	5.21394e-05	8.74484e-05	0.0082534	0.0191961	0.0183995	2.75753e-06	1.17716e-06	0.473242	0.0297106	0.0302637
C13	1.286e-05	0.00942382	0.0228332	5.1329e-06	0.000133287	5.5435e-06	0.000500087	2.50215e-05	0.00404628	3.44096e-06	0.0364628	0.913098	4.07871	3.01619e-05	2.96951e-05	3.81686e-06	6.2415e-07	3.20008e-05	8.91441e-05	0.00683164	0.00880083	0.0062213	2.93249e-06	1.04491e-06	0.0291361	0.479587	0.483499
H14	0.0181127	0.0192072	0.000908427	0.00785388	0.455872	0.00140467	0.0168997	0.0077073	0.0037056	0.00249131	0.000286231	3.37088e-05	3.01619e-05	0.373456	0.0141016	0.000115031	0.000179062	0.00460348	0.00389043	0.000260274	6.86714e-05	1.67999e-05	8.23875e-05	0.000113295	2.29801e-06	9.4334e-06	1.06627e-06
H15	0.0226092	0.00145445	0.000514319	0.004235	0.462971	0.0049663	0.0196839	0.000723689	0.0100808	0.000125842	2.08426e-05	1.84799e-05	2.96951e-05	0.0141016	0.387234	0.000186158	0.000931597	0.000799321	0.000261605	0.000681992	6.52983e-06	5.10828e-06	5.61486e-06	1.43335e-05	8.47968e-07	2.2839e-06	2.08081e-06
H16	0.0243724	0.000475766	0.000460992	0.00678441	0.00241333	0.458174	0.009858	0.017651	0.00524572	0.00698792	2.10281e-05	4.93305e-06	3.81686e-06	0.000115031	0.000186158	0.377608	0.0143342	0.00107586	0.00198844	0.000147441	1.55696e-06	8.94497e-06	0.000803126	0.000445881	1.09887e-06	9.59482e-07	4.53964e-07
H17	0.0226358	0.000181373	5.01304e-05	0.0041398	0.00503113	0.464753	0.000887603	0.018139	0.000262398	0.00693446	1.67044e-06	8.12447e-07	6.2415e-07	0.000179062	0.000931597	0.0143342	0.393913	3.68181e-05	0.00418051	9.23856e-06	1.13405e-07	5.26586e-07	0.000462392	0.00326897	7.7448e-08	2.48612e-07	4.91754e-08
H18	0.00316573	0.00871188	0.00148286	0.0144307	0.0176016	0.000502126	0.459253	0.000129458	0.0277477	7.79227e-05	9.79528e-05	5.21394e-05	3.20008e-05	0.00460348	0.000799321	0.00107586	3.68181e-05	0.368433	5.62069e-05	0.0033236	3.33532e-05	1.71063e-05	5.59186e-06	3.91613e-06	1.10328e-05	5.21115e-06	2.95608e-06
H19	0.00125825	0.015639	0.00508756	0.000491921	0.00287561	0.0186113	0.00146575	0.462961	0.00249598	0.0283025	0.000443105	8.74484e-05	8.91441e-05	0.00389043	0.000261605	0.00198844	0.00418051	5.62069e-05	0.389107	0.000100402	1.88713e-05	7.99953e-05	0.00356129	0.00636262	5.56834e-06	1.11849e-05	4.38018e-06
H20	0.000902379	0.0276918	0.00595261	0.000222291	0.00527314	0.000112882	0.0253915	3.97579e-05	0.462351	8.61097e-06	0.000566809	0.0082534	0.00683164	0.000260274	0.000681992	0.000147441	9.23856e-06	0.0033236	0.000100402	0.368893	9.02608e-05	8.74054e-05	2.32932e-06	2.66125e-06	0.000988278	0.000175221	0.000365516
H21	7.76281e-06	0.00830179	0.0268479	1.34352e-05	6.92083e-05	1.33513e-06	0.000219424	4.52731e-06	0.000470186	1.34635e-06	0.464122	0.0191961	0.00880083	6.86714e-05	6.52983e-06	1.55696e-06	1.13405e-07	3.33532e-05	1.88713e-05	9.02608e-05	0.396122	0.0144778	3.01781e-07	1.60495e-07	0.00157924	0.000483499	0.000803053
H22	1.27364e-05	0.00708403	0.0290968	6.36689e-06	2.03459e-05	3.67001e-06	0.000189431	2.82177e-05	0.0003562	3.70416e-06	0.463025	0.0183995	0.0062213	1.67999e-05	5.10828e-06	8.94497e-06	5.26586e-07	1.71063e-05	7.99953e-05	8.74054e-05	0.0144778	0.391601	5.28496e-07	1.17345e-06	0.00508545	0.00403417	0.000442205
H23	0.000907052	0.000126039	7.41198e-05	0.000516118	7.03529e-05	0.00637458	3.22443e-05	0.0299699	3.39602e-05	0.483287	6.27362e-06	2.75753e-06	2.93249e-06	8.23875e-05	5.61486e-06	0.000803126	0.000462392	5.59186e-06	0.00356129	2.32932e-06	3.01781e-07	5.28496e-07	0.407341	0.0167995	9.35434e-08	1.6967e-07	1.58156e-07
H24	0.00134242	0.000254027	7.70387e-05	0.000430085	0.000147884	0.00615107	6.6087e-05	0.0301761	8.00667e-05	0.48135	3.25206e-06	1.17716e-06	1.04491e-06	0.000113295	1.43335e-05	0.000445881	0.00326897	3.91613e-06	0.00636262	2.66125e-06	1.60495e-07	1.17345e-06	0.0167995	0.412309	9.81885e-08	2.75108e-07	2.82283e-08
H25	4.90707e-06	0.000572857	0.00587803	3.34017e-06	1.98943e-05	4.74558e-07	3.32741e-05	2.33613e-06	0.000406466	3.24308e-07	0.0199281	0.473242	0.0291361	2.29801e-06	8.47968e-07	1.09887e-06	7.7448e-08	1.10328e-05	5.56834e-06	0.000988278	0.00157924	0.00508545	9.35434e-08	9.81885e-08	0.411846	0.00674907	0.00363877
H26	4.69431e-06	0.00331679	0.00135375	2.33976e-06	1.14126e-05	1.06376e-06	8.79776e-05	4.64632e-06	0.000197083	6.49913e-07	0.00626746	0.0297106	0.479587	9.4334e-06	2.2839e-06	9.59482e-07	2.48612e-07	5.21115e-06	1.11849e-05	0.000175221	0.000483499	0.00403417	1.6967e-07	2.75108e-07	0.00674907	0.406937	0.016615
H27	2.08166e-06	0.00031625	0.00151293	1.09859e-06	6.20098e-06	4.95064e-07	4.19282e-05	8.74179e-07	0.000124026	1.82383e-07	0.00628374	0.0302637	0.483499	1.06627e-06	2.08081e-06	4.53964e-07	4.91754e-08	2.95608e-06	4.38018e-06	0.000365516	0.000803053	0.000442205	1.58156e-07	2.82283e-08	0.00363877	0.016615	0.409257
LDM — ajoene_z_17_LIDI_matrix
	S1	S2	S3	O4	C5	C6	C7	C8	C9	C10	C11	C12	C13	H14	H15	H16	H17	H18	H19	H20	H21	H22	H23	H24	H25	H26	H27
S1	12.929	0.00336397	0.000367189	0.68484	0.460797	0.467622	0.0277221	0.0299984	0.0164202	0.0155889	0.000111901	0.000713292	0.00125866	0.0221099	0.0197463	0.0222986	0.0201064	0.00192788	0.00227202	0.000956647	4.36272e-05	1.49586e-05	0.000695163	0.000999186	3.23133e-05	0.000166733	0.000503496		92.2625	31.7372
S2	0.00336397	14.5258	0.654214	0.00139499	0.0154905	0.0041065	0.0639633	0.000468734	0.573908	0.000154303	0.0385435	0.00956414	0.00536376	0.00159638	0.0170693	0.0034551	0.00465884	0.00907534	8.34675e-05	0.0270409	0.00851642	0.00642644	1.96721e-05	1.31276e-05	0.000546583	0.000213395	0.000870707
S3	0.000367189	0.654214	14.624	0.000287573	0.00200334	0.000362123	0.00923765	6.53952e-05	0.0404156	1.87154e-05	0.52879	0.038894	0.0198144	0.000211495	0.00191338	0.000428333	0.000314898	0.00135252	9.40792e-06	0.0143165	0.0274227	0.0291617	2.59233e-06	1.63571e-06	0.00698196	0.00148641	0.00119979
O4	0.68484	0.00139499	0.000287573	8.36629	0.0620434	0.0619387	0.0147657	0.0109151	0.00320975	0.00284315	2.96984e-05	0.000149651	0.000288973	0.00345704	0.00816718	0.00491504	0.00853932	0.0100195	0.00856264	0.000226182	1.27467e-05	7.83767e-06	0.000451681	0.00022204	9.56633e-06	9.03188e-05	0.000219634
C5	0.460797	0.0154905	0.00200334	0.0620434	4.06813	0.0250363	0.518193	0.00479011	0.0350931	0.0017574	0.000123705	0.000101602	0.000155314	0.464872	0.461862	0.00386291	0.00304256	0.0177788	0.000223906	0.00547019	4.8251e-05	2.49972e-05	0.000100742	0.000246809	2.56165e-05	1.64171e-05	2.07337e-05
C6	0.467622	0.0041065	0.000362123	0.0619387	0.0250363	4.07557	0.00864417	0.517433	0.00506583	0.0379943	0.000156177	0.00243474	0.0081086	0.00473506	0.00377407	0.441082	0.46449	0.000194848	0.0187898	0.000143714	6.14972e-05	2.94549e-05	0.00637255	0.00640717	0.000110483	0.000962292	0.00316144
C7	0.0277221	0.0639633	0.00923765	0.0147657	0.518193	0.00864417	3.95406	0.000860008	0.877211	0.000434524	0.0017258	0.0010887	0.00154436	0.0193887	0.0171142	0.0123308	0.000505614	0.463338	2.90287e-05	0.0246464	0.000476887	0.000192755	2.43745e-05	5.50168e-05	8.87643e-05	6.4424e-05	0.00010858
C8	0.0299984	0.000468734	6.53952e-05	0.0109151	0.00479011	0.517433	0.000860008	3.97779	0.000482249	0.91991	5.94717e-05	0.000608896	0.00418764	0.00103664	0.000402445	0.0174068	0.0179008	2.06371e-05	0.467886	1.28078e-05	7.0584e-06	8.38086e-06	0.0307663	0.0301705	5.26472e-05	0.0022253	0.00346073
C9	0.0164202	0.573908	0.0404156	0.00320975	0.0350931	0.00506583	0.877211	0.000482249	4.10062	0.000840796	0.00205093	0.00616998	0.00381404	0.00874073	0.00373393	0.00986363	0.000306805	0.0285442	1.16552e-05	0.463451	0.00044594	0.000302101	3.1442e-05	4.48616e-05	0.000824862	0.000132182	0.000124161
C10	0.0155889	0.000154303	1.87154e-05	0.00284315	0.0017574	0.0379943	0.000434524	0.91991	0.000840796	4.08418	2.24834e-05	0.000273843	0.00225667	0.000512041	6.43346e-05	0.00963028	0.00627143	1.21687e-05	0.0281137	2.81277e-05	4.2551e-06	9.93307e-06	0.482118	0.483654	5.81037e-05	0.000932428	0.00326495
C11	0.000111901	0.0385435	0.52879	2.96984e-05	0.000123705	0.000156177	0.0017258	5.94717e-05	0.00205093	2.24834e-05	4.01337	0.516866	0.0368192	3.70031e-05	9.34757e-05	0.000237677	8.80516e-05	0.00010689	1.02655e-05	0.000367791	0.462349	0.46346	5.14899e-06	6.36399e-07	0.0197874	0.00621275	0.00626632
C12	0.000713292	0.00956414	0.038894	0.000149651	0.000101602	0.00243474	0.0010887	0.000608896	0.00616998	0.000273843	0.516866	3.97053	0.911532	2.6343e-05	1.46773e-05	0.00472284	0.000128502	5.13234e-05	2.20548e-05	0.00183254	0.0193723	0.0182984	2.09017e-05	8.23227e-06	0.472304	0.0295335	0.029094
C13	0.00125866	0.00536376	0.0198144	0.000288973	0.000155314	0.0081086	0.00154436	0.00418764	0.00381404	0.00225667	0.0368192	0.911532	4.0695	5.21683e-05	1.83668e-05	0.0134623	0.000750795	5.21181e-05	0.000192014	0.000514916	0.00988031	0.00638106	0.000155219	4.59892e-05	0.0287677	0.479859	0.474914
H14	0.0221099	0.00159638	0.000211495	0.00345704	0.464872	0.00473506	0.0193887	0.00103664	0.00874073	0.000512041	3.70031e-05	2.6343e-05	5.21683e-05	0.390429	0.0148536	0.000276915	0.000263929	0.00131981	1.77914e-05	0.000678001	1.43113e-05	5.52851e-06	2.56485e-05	6.97227e-05	1.18991e-06	2.84239e-06	9.1485e-06
H15	0.0197463	0.0170693	0.00191338	0.00816718	0.461862	0.00377407	0.0171142	0.000402445	0.00373393	6.43346e-05	9.34757e-05	1.46773e-05	1.83668e-05	0.0148536	0.393678	0.000201959	0.00276507	0.00475743	0.000108703	0.000233249	3.77929e-05	2.4354e-05	1.21426e-05	8.15315e-06	2.977e-06	1.82792e-06	6.16197e-06
H16	0.0222986	0.0034551	0.000428333	0.00491504	0.00386291	0.441082	0.0123308	0.0174068	0.00986363	0.00963028	0.000237677	0.00472284	0.0134623	0.000276915	0.000201959	0.351348	0.0136444	0.000370957	0.0010336	0.000198647	0.000125121	2.1318e-05	0.000464999	0.000686573	0.000134153	0.0017586	0.00176104
H17	0.0201064	0.00465884	0.000314898	0.00853932	0.00304256	0.46449	0.000505614	0.0179008	0.000306805	0.00627143	8.80516e-05	0.000128502	0.000750795	0.000263929	0.00276507	0.0136444	0.402524	5.92512e-05	0.00503063	2.74572e-05	5.63359e-06	4.67981e-05	0.0040524	0.000463349	3.00484e-05	9.15708e-05	0.000942145
H18	0.00192788	0.00907534	0.00135252	0.0100195	0.0177788	0.000194848	0.463338	2.06371e-05	0.0285442	1.21687e-05	0.00010689	5.13234e-05	5.21181e-05	0.00131981	0.00475743	0.000370957	5.92512e-05	0.374887	4.5573e-06	0.00350912	3.74383e-05	1.11279e-05	9.34507e-07	1.3084e-06	1.49255e-05	3.44987e-06	3.85096e-06
H19	0.00227202	8.34675e-05	9.40792e-06	0.00856264	0.000223906	0.0187898	2.90287e-05	0.467886	1.16552e-05	0.0281137	1.02655e-05	2.20548e-05	0.000192014	1.77914e-05	0.000108703	0.0010336	0.00503063	4.5573e-06	0.389699	4.31657e-07	5.94635e-07	1.4663e-06	0.00658664	0.00356907	3.81498e-06	0.000360183	8.50823e-05
H20	0.000956647	0.0270409	0.0143165	0.000226182	0.00547019	0.000143714	0.0246464	1.28078e-05	0.463451	2.81277e-05	0.000367791	0.00183254	0.000514916	0.000678001	0.000233249	0.000198647	2.74572e-05	0.00350912	4.31657e-07	0.369796	3.08179e-05	0.000193922	1.15283e-06	1.18933e-06	0.000938899	2.14379e-05	3.41103e-05
H21	4.36272e-05	0.00851642	0.0274227	1.27467e-05	4.8251e-05	6.14972e-05	0.000476887	7.0584e-06	0.00044594	4.2551e-06	0.462349	0.0193723	0.00988031	1.43113e-05	3.77929e-05	0.000125121	5.63359e-06	3.74383e-05	5.94635e-07	3.08179e-05	0.394071	0.0144647	2.50002e-07	2.13587e-07	0.00121858	0.000765219	0.000470681
H22	1.49586e-05	0.00642644	0.0291617	7.83767e-06	2.49972e-05	2.94549e-05	0.000192755	8.38086e-06	0.000302101	9.93307e-06	0.46346	0.0182984	0.00638106	5.52851e-06	2.4354e-05	2.1318e-05	4.67981e-05	1.11279e-05	1.4663e-06	0.000193922	0.0144647	0.393585	3.33553e-06	2.73502e-07	0.00520318	0.000468411	0.00426403
H23	0.000695163	1.96721e-05	2.59233e-06	0.000451681	0.000100742	0.00637255	2.43745e-05	0.0307663	3.1442e-05	0.482118	5.14899e-06	2.09017e-05	0.000155219	2.56485e-05	1.21426e-05	0.000464999	0.0040524	9.34507e-07	0.00658664	1.15283e-06	2.50002e-07	3.33553e-06	0.41777	0.0170148	1.21172e-05	4.57684e-05	0.00041356
H24	0.000999186	1.31276e-05	1.63571e-06	0.00022204	0.000246809	0.00640717	5.50168e-05	0.0301705	4.48616e-05	0.483654	6.36399e-07	8.23227e-06	4.59892e-05	6.97227e-05	8.15315e-06	0.000686573	0.000463349	1.3084e-06	0.00356907	1.18933e-06	2.13587e-07	2.73502e-07	0.0170148	0.40937	6.76058e-07	2.62635e-05	8.40431e-05
H25	3.23133e-05	0.000546583	0.00698196	9.56633e-06	2.56165e-05	0.000110483	8.87643e-05	5.26472e-05	0.000824862	5.81037e-05	0.0197874	0.472304	0.0287677	1.18991e-06	2.977e-06	0.000134153	3.00484e-05	1.49255e-05	3.81498e-06	0.000938899	0.00121858	0.00520318	1.21172e-05	6.76058e-07	0.41038	0.00360149	0.00660694
H26	0.000166733	0.000213395	0.00148641	9.03188e-05	1.64171e-05	0.000962292	6.4424e-05	0.0022253	0.000132182	0.000932428	0.00621275	0.0295335	0.479859	2.84239e-06	1.82792e-06	0.0017586	9.15708e-05	3.44987e-06	0.000360183	2.14379e-05	0.000765219	0.000468411	4.57684e-05	2.62635e-05	0.00360149	0.40286	0.0164379
H27	0.000503496	0.000870707	0.00119979	0.000219634	2.07337e-05	0.00316144	0.00010858	0.00346073	0.000124161	0.00326495	0.00626632	0.029094	0.474914	9.1485e-06	6.16197e-06	0.00176104	0.000942145	3.85096e-06	8.50823e-05	3.41103e-05	0.000470681	0.00426403	0.00041356	8.40431e-05	0.00660694	0.0164379	0.403271
LDM — ajoene_z_18_LIDI_matrix
	S1	S2	S3	O4	C5	C6	C7	C8	C9	C10	C11	C12	C13	H14	H15	H16	H17	H18	H19	H20	H21	H22	H23	H24	H25	H26	H27
S1	12.9325	0.00351272	0.00045675	0.687601	0.462025	0.463703	0.0335234	0.0277091	0.014258	0.0160976	0.000112695	9.94805e-05	0.000339452	0.0215051	0.0221076	0.0186642	0.0227033	0.00492975	0.00249772	0.000650493	5.44949e-05	1.82623e-05	0.000677946	0.00135173	9.75157e-06	0.000422589	2.66919e-05		92.2309	31.7679
S2	0.00351272	14.4798	0.649935	0.00120182	0.0136367	0.00351835	0.064593	0.00226312	0.577686	0.00948901	0.037865	0.0137758	0.00714517	0.00163943	0.0129487	0.00795461	0.000365629	0.00951959	0.000266307	0.0271131	0.00382418	0.00892619	0.01457	0.000462148	0.000647302	0.000474987	0.000262305
S3	0.00045675	0.649935	14.6246	0.000150737	0.00166703	0.000266467	0.0101574	0.00022722	0.042129	0.000772377	0.529102	0.0390324	0.0197037	0.000233476	0.0014469	0.000463033	2.5375e-05	0.00144312	2.4956e-05	0.0152985	0.0291731	0.0272044	0.000883571	3.29389e-05	0.00784772	0.00123626	0.00148775
O4	0.687601	0.00120182	0.000150737	8.3649	0.0625394	0.0614917	0.00920395	0.0171324	0.00516844	0.00326544	4.71889e-05	9.90365e-05	0.000291455	0.00754525	0.00331565	0.00754044	0.00309754	0.000657426	0.0143657	0.000454573	3.58698e-05	8.47191e-06	0.000464876	0.000319115	9.44929e-06	0.000307843	8.34264e-06
C5	0.462025	0.0136367	0.00166703	0.0625394	4.07833	0.0246149	0.521127	0.00660885	0.0347179	0.00365335	0.000124897	3.41367e-05	3.64382e-05	0.461431	0.454492	0.00346073	0.00501774	0.0187334	0.000172873	0.00549539	5.07355e-05	3.80502e-05	0.000152108	0.00012478	2.77021e-06	3.50565e-05	8.1009e-06
C6	0.463703	0.00351835	0.000266467	0.0614917	0.0246149	4.07093	0.00451077	0.516329	0.00303529	0.0370386	8.99814e-05	0.000938859	0.00361877	0.00380901	0.00507105	0.45495	0.466109	0.000330451	0.0187373	7.39462e-05	9.28731e-05	2.35009e-05	0.00535289	0.00639584	7.44816e-05	0.00413094	0.000156767
C7	0.0335234	0.064593	0.0101574	0.00920395	0.521127	0.00451077	3.96447	0.000686937	0.880001	0.000449368	0.00188558	0.000370931	0.000125148	0.0191871	0.0168227	0.00482431	0.000429473	0.47013	9.56487e-05	0.0251991	0.000673726	0.000308117	0.000273573	2.51273e-05	3.7036e-05	3.40646e-05	4.57131e-06
C8	0.0277091	0.00226312	0.00022722	0.0171324	0.00660885	0.516329	0.000686937	3.9807	0.000320146	0.91611	3.83741e-05	0.00045268	0.0014029	0.000451097	0.0100272	0.0166787	0.019439	0.000189136	0.464281	2.42675e-05	1.24332e-05	1.44244e-05	0.0285518	0.0304117	2.0392e-05	0.000316642	0.000837233
C9	0.014258	0.577686	0.042129	0.00516844	0.0347179	0.00303529	0.880001	0.000320146	4.11028	0.000409442	0.00312165	0.000619866	0.000233826	0.00897751	0.003431	0.00493333	0.000295597	0.030377	0.000115065	0.464025	0.00274505	0.000393108	0.000559242	2.16881e-05	0.000144505	0.000101777	1.40383e-05
C10	0.0160976	0.00948901	0.000772377	0.00326544	0.00365335	0.0370386	0.000449368	0.91611	0.000409442	4.08684	0.000137464	0.00214103	0.00565326	0.000301995	0.00819778	0.0048673	0.0104179	0.000159316	0.0273941	8.20359e-05	7.66108e-06	6.05201e-05	0.468671	0.483912	7.14198e-05	0.000178173	0.00194685
C11	0.000112695	0.037865	0.529102	4.71889e-05	0.000124897	8.99814e-05	0.00188558	3.83741e-05	0.00312165	0.000137464	4.01372	0.516498	0.0369532	4.70449e-05	7.30532e-05	0.000340303	1.36336e-05	0.000117304	6.56677e-06	0.000598735	0.463489	0.461961	0.000275151	8.7908e-06	0.0196692	0.00636998	0.00620733
C12	9.94805e-05	0.0137758	0.0390324	9.90365e-05	3.41367e-05	0.000938859	0.000370931	0.00045268	0.000619866	0.00214103	0.516498	3.96799	0.912261	8.41762e-06	2.9283e-05	0.00196213	8.32415e-05	2.3365e-05	0.000119718	0.000181906	0.018439	0.0192533	0.00536254	0.000157834	0.471877	0.0298697	0.0293941
C13	0.000339452	0.00714517	0.0197037	0.000291455	3.64382e-05	0.00361877	0.000125148	0.0014029	0.000233826	0.00565326	0.0369532	0.912261	4.07023	5.00289e-06	2.77892e-05	0.00706313	0.000423371	7.28888e-06	0.000178979	6.86267e-05	0.00643822	0.0100205	0.00996933	0.000332895	0.0286391	0.476702	0.480443
H14	0.0215051	0.00163943	0.000233476	0.00754525	0.461431	0.00380901	0.0191871	0.000451097	0.00897751	0.000301995	4.70449e-05	8.41762e-06	5.00289e-06	0.38043	0.0138704	0.000399678	0.000965732	0.00167248	1.21119e-05	0.000679668	1.72774e-05	1.16708e-05	2.31805e-05	1.03855e-05	6.86498e-07	8.28195e-06	8.40132e-07
H15	0.0221076	0.0129487	0.0014469	0.00331565	0.454492	0.00507105	0.0168227	0.0100272	0.003431	0.00819778	7.30532e-05	2.9283e-05	2.77892e-05	0.0138704	0.370915	0.000669956	0.000410939	0.00470114	0.000228898	0.000190359	4.88541e-06	3.78482e-05	0.000425115	0.000200761	1.10439e-06	5.86051e-06	9.764e-06
H16	0.0186642	0.00795461	0.000463033	0.00754044	0.00346073	0.45495	0.00482431	0.0166787	0.00493333	0.0048673	0.000340303	0.00196213	0.00706313	0.000399678	0.000669956	0.378347	0.0144595	9.65333e-05	0.00456349	9.316e-05	0.000291646	6.04313e-05	0.00260456	0.00033394	0.000142596	0.00584134	0.00026489
H17	0.0227033	0.000365629	2.5375e-05	0.00309754	0.00501774	0.466109	0.000429473	0.019439	0.000295597	0.0104179	1.36336e-05	8.32415e-05	0.000423371	0.000965732	0.000410939	0.0144595	0.398942	1.10989e-05	0.000968683	9.04068e-06	9.96112e-06	1.65914e-06	0.000431403	0.000755937	2.09058e-05	0.000733372	3.65715e-05
H18	0.00492975	0.00951959	0.00144312	0.000657426	0.0187334	0.000330451	0.47013	0.000189136	0.030377	0.000159316	0.000117304	2.3365e-05	7.28888e-06	0.00167248	0.00470114	9.65333e-05	1.10989e-05	0.399669	5.98621e-06	0.00380904	4.01367e-05	2.23071e-05	2.52464e-05	7.71043e-06	4.66248e-06	1.78159e-06	6.55008e-07
H19	0.00249772	0.000266307	2.4956e-05	0.0143657	0.000172873	0.0187373	9.56487e-05	0.464281	0.000115065	0.0273941	6.56677e-06	0.000119718	0.000178979	1.21119e-05	0.000228898	0.00456349	0.000968683	5.98621e-06	0.380053	4.98242e-06	6.76558e-06	2.57769e-06	0.00589324	0.00359142	6.35364e-06	8.30517e-05	3.28849e-05
H20	0.000650493	0.0271131	0.0152985	0.000454573	0.00549539	7.39462e-05	0.0251991	2.42675e-05	0.464025	8.20359e-05	0.000598735	0.000181906	6.86267e-05	0.000679668	0.000190359	9.316e-05	9.04068e-06	0.00380904	4.98242e-06	0.371467	0.000588338	5.7537e-05	0.000130271	3.98864e-06	4.21292e-05	6.81513e-06	5.93531e-06
H21	5.44949e-05	0.00382418	0.0291731	3.58698e-05	5.07355e-05	9.28731e-05	0.000673726	1.24332e-05	0.00274505	7.66108e-06	0.463489	0.018439	0.00643822	1.72774e-05	4.88541e-06	0.000291646	9.96112e-06	4.01367e-05	6.76558e-06	0.000588338	0.397561	0.0146145	1.89633e-05	4.62382e-07	0.00517042	0.00437047	0.000472037
H22	1.82623e-05	0.00892619	0.0272044	8.47191e-06	3.80502e-05	2.35009e-05	0.000308117	1.44244e-05	0.000393108	6.05201e-05	0.461961	0.0192533	0.0100205	1.16708e-05	3.78482e-05	6.04313e-05	1.65914e-06	2.23071e-05	2.57769e-06	5.7537e-05	0.0146145	0.392452	0.000124965	5.61163e-06	0.00112707	0.000485159	0.000746446
H23	0.000677946	0.01457	0.000883571	0.000464876	0.000152108	0.00535289	0.000273573	0.0285518	0.000559242	0.468671	0.000275151	0.00536254	0.00996933	2.31805e-05	0.000425115	0.00260456	0.000431403	2.52464e-05	0.00589324	0.000130271	1.89633e-05	0.000124965	0.385194	0.0158922	0.000249412	0.00032261	0.00155535
H24	0.00135173	0.000462148	3.29389e-05	0.000319115	0.00012478	0.00639584	2.51273e-05	0.0304117	2.16881e-05	0.483912	8.7908e-06	0.000157834	0.000332895	1.03855e-05	0.000200761	0.00033394	0.000755937	7.71043e-06	0.00359142	3.98864e-06	4.62382e-07	5.61163e-06	0.0158922	0.412297	4.46696e-06	7.1113e-06	4.64237e-05
H25	9.75157e-06	0.000647302	0.00784772	9.44929e-06	2.77021e-06	7.44816e-05	3.7036e-05	2.0392e-05	0.000144505	7.14198e-05	0.0196692	0.471877	0.0286391	6.86498e-07	1.10439e-06	0.000142596	2.09058e-05	4.66248e-06	6.35364e-06	4.21292e-05	0.00517042	0.00112707	0.000249412	4.46696e-06	0.406282	0.00663905	0.00356356
H26	0.000422589	0.000474987	0.00123626	0.000307843	3.50565e-05	0.00413094	3.40646e-05	0.000316642	0.000101777	0.000178173	0.00636998	0.0298697	0.476702	8.28195e-06	5.86051e-06	0.00584134	0.000733372	1.78159e-06	8.30517e-05	6.81513e-06	0.00437047	0.000485159	0.00032261	7.1113e-06	0.00663905	0.410221	0.0165217
H27	2.66919e-05	0.000262305	0.00148775	8.34264e-06	8.1009e-06	0.000156767	4.57131e-06	0.000837233	1.40383e-05	0.00194685	0.00620733	0.0293941	0.480443	8.40132e-07	9.764e-06	0.00026489	3.65715e-05	6.55008e-07	3.28849e-05	5.93531e-06	0.000472037	0.000746446	0.00155535	4.64237e-05	0.00356356	0.0165217	0.401695
LDM — ajoene_z_19_LIDI_matrix
	S1	S2	S3	O4	C5	C6	C7	C8	C9	C10	C11	C12	C13	H14	H15	H16	H17	H18	H19	H20	H21	H22	H23	H24	H25	H26	H27
S1	12.9071	0.00236865	0.00105074	0.683212	0.466723	0.462999	0.0315847	0.0274138	0.0134872	0.0168797	0.000900484	0.000810507	0.00796806	0.0183827	0.0238997	0.0228021	0.0195231	0.00290101	0.00195888	0.000663215	7.88427e-05	0.00250918	0.000755947	0.0012986	0.00040257	0.019601	0.000569657		92.2758	31.7254
S2	0.00236865	14.538	0.642857	0.00125762	0.0181131	0.000287599	0.0553597	6.07587e-05	0.57267	9.92793e-05	0.0380645	0.0148734	0.00902195	0.0226021	0.00130842	6.3283e-05	5.03046e-05	0.00876008	3.50765e-06	0.0293836	0.00895397	0.00380419	1.13083e-05	3.93282e-06	0.000620468	0.000498183	0.000282005
S3	0.00105074	0.642857	14.6365	0.000262075	0.00194947	0.000114643	0.0191589	2.85376e-05	0.0453557	7.04508e-05	0.53066	0.0398564	0.0202241	0.00140933	0.000568568	2.99135e-05	4.85127e-05	0.00150011	1.98233e-06	0.00728667	0.026948	0.0285745	5.40328e-06	2.67268e-06	0.0078878	0.00123801	0.00155673
O4	0.683212	0.00125762	0.000262075	8.36678	0.061775	0.0612404	0.0109701	0.0129735	0.00228061	0.00318842	0.000119242	0.000107346	0.00120972	0.00764668	0.00509686	0.00361718	0.00835802	0.00949185	0.0100774	0.000130402	1.21567e-05	0.000339097	0.000469824	0.000283971	7.50517e-05	0.00243933	0.000112455
C5	0.466723	0.0181131	0.00194947	0.061775	4.08481	0.0246661	0.518373	0.00891139	0.0347236	0.00516311	0.00031555	0.000642823	0.00239125	0.453356	0.451864	0.00479054	0.00355072	0.0179095	0.000222804	0.00549781	4.53072e-05	0.000408184	0.000361566	0.000163124	4.67065e-05	0.00224237	5.61684e-05
C6	0.462999	0.000287599	0.000114643	0.0612404	0.0246661	4.06907	0.00485714	0.517783	0.00180244	0.0373864	4.35748e-05	0.000152515	0.00111024	0.00298961	0.00358896	0.464623	0.464178	0.000255426	0.0187267	0.000197837	9.03085e-06	0.000167097	0.00627306	0.00634513	3.16545e-05	0.00204622	0.00020469
C7	0.0315847	0.0553597	0.0191589	0.0109701	0.518373	0.00485714	3.96654	0.000967719	0.883924	0.000550322	0.00218129	0.000275769	0.000333941	0.0168268	0.0186835	0.0010177	0.000376995	0.463556	2.3845e-05	0.0263957	0.000404518	0.00337041	4.81023e-05	1.80707e-05	7.96513e-05	0.000229386	1.17653e-05
C8	0.0274138	6.07587e-05	2.85376e-05	0.0129735	0.00891139	0.517783	0.000967719	3.97502	0.000402885	0.915695	1.02079e-05	1.30338e-05	9.11565e-05	0.000480742	0.0124523	0.0191519	0.0176482	3.60207e-05	0.466448	5.15328e-05	1.52298e-06	4.45276e-05	0.0305107	0.0299516	1.58972e-06	0.000249804	2.85675e-05
C9	0.0134872	0.57267	0.0453557	0.00228061	0.0347236	0.00180244	0.883924	0.000402885	4.0945	0.00079408	0.00464731	0.00069837	0.000292103	0.00390571	0.00948342	0.000512593	5.42396e-05	0.0279952	1.34056e-05	0.467974	0.000535161	0.00525911	2.6745e-05	2.78888e-05	0.000164265	0.000101229	1.25511e-05
C10	0.0168797	9.92793e-05	7.04508e-05	0.00318842	0.00516311	0.0373864	0.000550322	0.915695	0.00079408	4.08131	9.01573e-06	5.22918e-06	3.60259e-05	0.000422561	0.00981545	0.00989555	0.0059654	1.98198e-05	0.0277573	4.27354e-05	2.43275e-06	3.1286e-05	0.481501	0.482985	1.92915e-06	7.13123e-05	6.47992e-06
C11	0.000900484	0.0380645	0.53066	0.000119242	0.00031555	4.35748e-05	0.00218129	1.02079e-05	0.00464731	9.01573e-06	4.01576	0.516342	0.0367273	0.000338962	4.29304e-05	4.06664e-06	3.1968e-05	0.000101504	9.44258e-07	0.000293606	0.462641	0.459702	9.77369e-07	9.88468e-07	0.0196749	0.00612041	0.00628156
C12	0.000810507	0.0148734	0.0398564	0.000107346	0.000642823	0.000152515	0.000275769	1.30338e-05	0.00069837	5.22918e-06	0.516342	3.96368	0.91665	0.00206439	7.64009e-05	8.75996e-06	0.000539561	2.76355e-05	8.52653e-06	0.000209874	0.0194267	0.0181501	3.01898e-06	3.4157e-07	0.472203	0.0293876	0.0303307
C13	0.00796806	0.00902195	0.0202241	0.00120972	0.00239125	0.00111024	0.000333941	9.11565e-05	0.000292103	3.60259e-05	0.0367273	0.91665	4.08884	0.00529704	0.000167273	5.64303e-05	0.00237052	7.75319e-05	5.64273e-05	0.000102197	0.0100067	0.0060294	1.41734e-05	2.80903e-06	0.0287897	0.469666	0.484158
H14	0.0183827	0.0226021	0.00140933	0.00764668	0.453356	0.00298961	0.0168268	0.000480742	0.00390571	0.000422561	0.000338962	0.00206439	0.00529704	0.369959	0.0132975	0.000234115	0.00258714	0.00463138	6.57779e-05	0.000303961	7.51309e-05	0.000110681	0.000204256	2.08754e-05	7.03725e-05	0.0022067	0.000153328
H15	0.0238997	0.00130842	0.000568568	0.00509686	0.451864	0.00358896	0.0186835	0.0124523	0.00948342	0.00981545	4.29304e-05	7.64009e-05	0.000167273	0.0132975	0.365275	0.00025158	0.000174932	0.000861791	0.000463895	0.000637078	1.06186e-05	9.77427e-05	0.000433404	0.000250516	4.4171e-06	0.000246019	2.34896e-06
H16	0.0228021	6.3283e-05	2.99135e-05	0.00361718	0.00479054	0.464623	0.0010177	0.0191519	0.000512593	0.00989555	4.06664e-06	8.75996e-06	5.64303e-05	0.000234115	0.00025158	0.391658	0.0148059	1.98525e-05	0.00112019	5.23594e-05	1.26774e-06	4.3811e-06	0.000474053	0.000773429	2.30233e-06	0.000104724	9.2628e-06
H17	0.0195231	5.03046e-05	4.85127e-05	0.00835802	0.00355072	0.464178	0.000376995	0.0176482	5.42396e-05	0.0059654	3.1968e-05	0.000539561	0.00237052	0.00258714	0.000174932	0.0148059	0.397998	0.000104009	0.00493421	7.22136e-06	8.45466e-06	7.26649e-06	0.00386771	0.000444623	4.57616e-05	0.00192803	0.000491616
H18	0.00290101	0.00876008	0.00150011	0.00949185	0.0179095	0.000255426	0.463556	3.60207e-05	0.0279952	1.98198e-05	0.000101504	2.76355e-05	7.75319e-05	0.00463138	0.000861791	1.98525e-05	0.000104009	0.37706	5.11845e-06	0.00339137	1.81724e-05	8.78475e-05	8.52626e-06	8.6442e-07	4.81425e-06	3.13011e-05	1.37113e-06
H19	0.00195888	3.50765e-06	1.98233e-06	0.0100774	0.000222804	0.0187267	2.3845e-05	0.466448	1.34056e-05	0.0277573	9.44258e-07	8.52653e-06	5.64273e-05	6.57779e-05	0.000463895	0.00112019	0.00493421	5.11845e-06	0.383674	1.21763e-06	1.51272e-07	2.01307e-06	0.00649972	0.00352897	1.46161e-06	6.88035e-05	1.67324e-05
H20	0.000663215	0.0293836	0.00728667	0.000130402	0.00549781	0.000197837	0.0263957	5.15328e-05	0.467974	4.27354e-05	0.000293606	0.000209874	0.000102197	0.000303961	0.000637078	5.23594e-05	7.22136e-06	0.00339137	1.21763e-06	0.379956	1.91256e-05	0.000137535	1.78293e-06	1.1372e-06	1.56389e-05	4.91752e-06	5.4024e-06
H21	7.88427e-05	0.00895397	0.026948	1.21567e-05	4.53072e-05	9.03085e-06	0.000404518	1.52298e-06	0.000535161	2.43275e-06	0.462641	0.0194267	0.0100067	7.51309e-05	1.06186e-05	1.26774e-06	8.45466e-06	1.81724e-05	1.51272e-07	1.91256e-05	0.39371	0.0143521	1.87999e-07	1.33796e-07	0.00114428	0.000477822	0.000768323
H22	0.00250918	0.00380419	0.0285745	0.000339097	0.000408184	0.000167097	0.00337041	4.45276e-05	0.00525911	3.1286e-05	0.459702	0.0181501	0.0060294	0.000110681	9.77427e-05	4.3811e-06	7.26649e-06	8.78475e-05	2.01307e-06	0.000137535	0.0143521	0.387721	1.78136e-06	3.86113e-06	0.00503027	0.00403055	0.000432297
H23	0.000755947	1.13083e-05	5.40328e-06	0.000469824	0.000361566	0.00627306	4.81023e-05	0.0305107	2.6745e-05	0.481501	9.77369e-07	3.01898e-06	1.41734e-05	0.000204256	0.000433404	0.000474053	0.00386771	8.52626e-06	0.00649972	1.78293e-06	1.87999e-07	1.78136e-06	0.415368	0.0168809	2.4044e-07	1.0487e-05	4.74361e-06
H24	0.0012986	3.93282e-06	2.67268e-06	0.000283971	0.000163124	0.00634513	1.80707e-05	0.0299516	2.78888e-05	0.482985	9.88468e-07	3.4157e-07	2.80903e-06	2.08754e-05	0.000250516	0.000773429	0.000444623	8.6442e-07	0.00352897	1.1372e-06	1.33796e-07	3.86113e-06	0.0168809	0.40674	1.63701e-07	8.54756e-06	6.76544e-07
H25	0.00040257	0.000620468	0.0078878	7.50517e-05	4.67065e-05	3.16545e-05	7.96513e-05	1.58972e-06	0.000164265	1.92915e-06	0.0196749	0.472203	0.0287897	7.03725e-05	4.4171e-06	2.30233e-06	4.57616e-05	4.81425e-06	1.46161e-06	1.56389e-05	0.00114428	0.00503027	2.4044e-07	1.63701e-07	0.408353	0.00626725	0.00363346
H26	0.019601	0.000498183	0.00123801	0.00243933	0.00224237	0.00204622	0.000229386	0.000249804	0.000101229	7.13123e-05	0.00612041	0.0293876	0.469666	0.0022067	0.000246019	0.000104724	0.00192803	3.13011e-05	6.88035e-05	4.91752e-06	0.000477822	0.00403055	1.0487e-05	8.54756e-06	0.00626725	0.397588	0.0164325
H27	0.000569657	0.000282005	0.00155673	0.000112455	5.61684e-05	0.00020469	1.17653e-05	2.85675e-05	1.25511e-05	6.47992e-06	0.00628156	0.0303307	0.484158	0.000153328	2.34896e-06	9.2628e-06	0.000491616	1.37113e-06	1.67324e-05	5.4024e-06	0.000768323	0.000432297	4.74361e-06	6.76544e-07	0.00363346	0.0164325	0.412793
LDM — ajoene_z_20_LIDI_matrix
	S1	S2	S3	O4	C5	C6	C7	C8	C9	C10	C11	C12	C13	H14	H15	H16	H17	H18	H19	H20	H21	H22	H23	H24	H25	H26	H27
S1	12.9236	0.00321715	0.000453518	0.685412	0.461145	0.466564	0.0278227	0.0307174	0.0162438	0.016352	0.000195208	0.000195686	0.000568309	0.0194498	0.0220296	0.0195003	0.0238862	0.00200842	0.00208172	0.000921812	0.000377194	1.70609e-05	0.000725299	0.000975611	2.25607e-05	2.84186e-05	0.000943607		92.2634	31.7366
S2	0.00321715	14.5185	0.650321	0.00130607	0.0158387	0.00347399	0.0631259	0.000413569	0.575721	0.000135006	0.0380237	0.0134221	0.0069778	0.0180136	0.00159649	0.00366553	0.00310934	0.00899307	6.34972e-05	0.0276484	0.0038999	0.00899076	1.63562e-05	1.16037e-05	0.000693628	0.000246381	0.000301674
S3	0.000453518	0.650321	14.6248	0.000281934	0.00199725	0.000217429	0.011254	3.20977e-05	0.0424253	3.11301e-05	0.53024	0.0390504	0.0186305	0.00182132	0.0002778	0.000326696	0.000324092	0.00137432	6.1926e-06	0.0139421	0.0288463	0.0274697	2.88331e-05	2.25332e-06	0.00881905	0.00155678	0.00116108
O4	0.685412	0.00130607	0.000281934	8.366	0.0620299	0.0620511	0.0149812	0.0106231	0.00317606	0.00294124	4.49455e-05	0.000134531	0.000324258	0.00802318	0.00336541	0.00816291	0.00528017	0.0105247	0.00755174	0.000220811	8.82217e-05	7.51404e-06	0.00041688	0.000212306	1.07002e-05	1.07805e-05	0.000387339
C5	0.461145	0.0158387	0.00199725	0.0620299	4.07053	0.0249988	0.518413	0.0048379	0.0348357	0.00189957	0.000136492	4.01437e-05	3.31771e-05	0.460763	0.464743	0.00316086	0.00382619	0.0177515	0.00021449	0.00548622	6.68955e-05	3.5288e-05	0.000102062	0.000240129	3.13551e-06	3.1963e-06	3.24098e-05
C6	0.466564	0.00347399	0.000217429	0.0620511	0.0249988	4.07158	0.00834081	0.517273	0.00496975	0.0376812	0.000346139	0.0011518	0.00545821	0.00395181	0.0047404	0.460091	0.449837	0.000195686	0.0188672	0.000128406	0.00107458	5.37775e-05	0.00620088	0.00638678	0.000112372	0.000225108	0.00628319
C7	0.0278227	0.0631259	0.011254	0.0149812	0.518413	0.00834081	3.95568	0.00086762	0.877935	0.000401261	0.00184749	0.000336589	0.0001398	0.0171394	0.019554	0.000456251	0.0120962	0.462825	2.89867e-05	0.0251732	0.000675552	0.000351469	2.31085e-05	5.60559e-05	3.73466e-05	4.02784e-06	2.36254e-05
C8	0.0307174	0.000413569	3.20977e-05	0.0106231	0.0048379	0.517273	0.00086762	3.98036	0.000476372	0.918532	6.72513e-05	0.000286243	0.00268132	0.000411791	0.00102245	0.0173115	0.0181187	2.17923e-05	0.46875	1.2209e-05	0.00010404	5.80133e-06	0.0303631	0.0299923	0.000123052	0.000215031	0.00664217
C9	0.0162438	0.575721	0.0424253	0.00317606	0.0348357	0.00496975	0.877935	0.000476372	4.10702	0.000804094	0.00298754	0.000627825	0.000196926	0.0037053	0.00894573	0.000275947	0.00980956	0.0282639	1.20628e-05	0.464667	0.00242759	0.000383408	3.04435e-05	4.55889e-05	0.000144589	9.24024e-06	3.59107e-05
C10	0.016352	0.000135006	3.11301e-05	0.00294124	0.00189957	0.0376812	0.000401261	0.918532	0.000804094	4.08096	4.91853e-05	0.000422739	0.00352001	7.0089e-05	0.000533738	0.00598269	0.00939763	1.25616e-05	0.0281522	2.6157e-05	6.56643e-05	9.18613e-06	0.480143	0.483295	0.000118165	0.000540715	0.00747035
C11	0.000195208	0.0380237	0.53024	4.49455e-05	0.000136492	0.000346139	0.00184749	6.72513e-05	0.00298754	4.91853e-05	4.01518	0.515824	0.0371117	9.6475e-05	3.80986e-05	0.000159625	0.00122574	0.000106088	2.83591e-06	0.000402052	0.462624	0.461615	3.23635e-05	1.76179e-06	0.0197242	0.00632062	0.0059944
C12	0.000195686	0.0134221	0.0390504	0.000134531	4.01437e-05	0.0011518	0.000336589	0.000286243	0.000627825	0.000422739	0.515824	3.97018	0.918517	4.01619e-05	9.87033e-06	0.00212994	0.000371509	2.09243e-05	2.3501e-05	0.000197175	0.0182773	0.0193934	0.000389119	1.27859e-05	0.471869	0.0303712	0.0288858
C13	0.000568309	0.0069778	0.0186305	0.000324258	3.31771e-05	0.00545821	0.0001398	0.00268132	0.000196926	0.00352001	0.0371117	0.918517	4.08241	4.13728e-05	5.54731e-06	0.00615827	0.00139368	6.12511e-06	0.00013457	8.15059e-05	0.00625958	0.0106123	0.00218354	0.000103374	0.0287413	0.483075	0.470057
H14	0.0194498	0.0180136	0.00182132	0.00802318	0.460763	0.00395181	0.0171394	0.000411791	0.0037053	7.0089e-05	9.6475e-05	4.01619e-05	4.13728e-05	0.38875	0.0147078	0.00294111	0.000212561	0.00474353	0.000110139	0.000242196	7.13803e-06	2.98505e-05	1.22538e-05	8.08883e-06	9.47671e-07	3.01931e-06	8.39907e-06
H15	0.0220296	0.00159649	0.0002778	0.00336541	0.464743	0.0047404	0.019554	0.00102245	0.00894573	0.000533738	3.80986e-05	9.87033e-06	5.54731e-06	0.0147078	0.389926	0.000264283	0.000270159	0.00126742	1.76798e-05	0.000709407	1.71625e-05	1.01784e-05	2.62272e-05	6.6725e-05	6.00159e-07	5.60651e-07	8.03538e-06
H16	0.0195003	0.00366553	0.000326696	0.00816291	0.00316086	0.460091	0.000456251	0.0173115	0.000275947	0.00598269	0.000159625	0.00212994	0.00615827	0.00294111	0.000264283	0.390859	0.0138382	6.23812e-05	0.00491234	2.40733e-05	5.4119e-05	7.63203e-05	0.00373963	0.000435626	7.57024e-05	0.000251747	0.00281928
H17	0.0238862	0.00310934	0.000324092	0.00528017	0.00382619	0.449837	0.0120962	0.0181187	0.00980956	0.00939763	0.00122574	0.000371509	0.00139368	0.000212561	0.000270159	0.0138382	0.371117	0.000360014	0.00118996	0.000204879	0.00217442	9.28572e-05	0.000473791	0.000717878	9.13774e-05	0.0001258	0.00210029
H18	0.00200842	0.00899307	0.00137432	0.0105247	0.0177515	0.000195686	0.462825	2.17923e-05	0.0282639	1.25616e-05	0.000106088	2.09243e-05	6.12511e-06	0.00474353	0.00126742	6.23812e-05	0.000360014	0.373537	4.40632e-06	0.00348543	3.63141e-05	2.07139e-05	9.51388e-07	1.34832e-06	4.83725e-06	2.28303e-07	1.18417e-06
H19	0.00208172	6.34972e-05	6.1926e-06	0.00755174	0.00021449	0.0188672	2.89867e-05	0.46875	1.20628e-05	0.0281522	2.83591e-06	2.3501e-05	0.00013457	0.000110139	1.76798e-05	0.00491234	0.00118996	4.40632e-06	0.39045	4.03263e-07	2.94181e-06	8.90124e-07	0.00653665	0.00355708	2.65121e-06	3.87137e-05	0.000131966
H20	0.000921812	0.0276484	0.0139421	0.000220811	0.00548622	0.000128406	0.0251732	1.2209e-05	0.464667	2.6157e-05	0.000402052	0.000197175	8.15059e-05	0.000242196	0.000709407	2.40733e-05	0.000204879	0.00348543	4.03263e-07	0.372025	0.000298237	3.50061e-05	1.11543e-06	1.1528e-06	3.35272e-05	6.70718e-06	4.9026e-06
H21	0.000377194	0.0038999	0.0288463	8.82217e-05	6.68955e-05	0.00107458	0.000675552	0.00010404	0.00242759	6.56643e-05	0.462624	0.0182773	0.00625958	7.13803e-06	1.71625e-05	5.4119e-05	0.00217442	3.63141e-05	2.94181e-06	0.000298237	0.394761	0.0145322	3.661e-06	4.12236e-06	0.00509411	0.000453387	0.00387108
H22	1.70609e-05	0.00899076	0.0274697	7.51404e-06	3.5288e-05	5.37775e-05	0.000351469	5.80133e-06	0.000383408	9.18613e-06	0.461615	0.0193934	0.0106123	2.98505e-05	1.01784e-05	7.63203e-05	9.28572e-05	2.07139e-05	8.90124e-07	3.50061e-05	0.0145322	0.392456	4.19409e-06	3.29449e-07	0.000983607	0.000742317	0.000458775
H23	0.000725299	1.63562e-05	2.88331e-05	0.00041688	0.000102062	0.00620088	2.31085e-05	0.0303631	3.04435e-05	0.480143	3.23635e-05	0.000389119	0.00218354	1.22538e-05	2.62272e-05	0.00373963	0.000473791	9.51388e-07	0.00653665	1.11543e-06	3.661e-06	4.19409e-06	0.414005	0.0168131	2.2674e-05	0.000930643	0.00160037
H24	0.000975611	1.16037e-05	2.25332e-06	0.000212306	0.000240129	0.00638678	5.60559e-05	0.0299923	4.55889e-05	0.483295	1.76179e-06	1.27859e-05	0.000103374	8.08883e-06	6.6725e-05	0.000435626	0.000717878	1.34832e-06	0.00355708	1.1528e-06	4.12236e-06	3.29449e-07	0.0168131	0.408077	2.20209e-06	4.2785e-05	0.000190691
H25	2.25607e-05	0.000693628	0.00881905	1.07002e-05	3.13551e-06	0.000112372	3.73466e-05	0.000123052	0.000144589	0.000118165	0.0197242	0.471869	0.0287413	9.47671e-07	6.00159e-07	7.57024e-05	9.13774e-05	4.83725e-06	2.65121e-06	3.35272e-05	0.00509411	0.000983607	2.2674e-05	2.20209e-06	0.407483	0.00368847	0.00629807
H26	2.84186e-05	0.000246381	0.00155678	1.07805e-05	3.1963e-06	0.000225108	4.02784e-06	0.000215031	9.24024e-06	0.000540715	0.00632062	0.0303712	0.483075	3.01931e-06	5.60651e-07	0.000251747	0.0001258	2.28303e-07	3.87137e-05	6.70718e-06	0.000453387	0.000742317	0.000930643	4.2785e-05	0.00368847	0.411166	0.0163656
H27	0.000943607	0.000301674	0.00116108	0.000387339	3.24098e-05	0.00628319	2.36254e-05	0.00664217	3.59107e-05	0.00747035	0.0059944	0.0288858	0.470057	8.39907e-06	8.03538e-06	0.00281928	0.00210029	1.18417e-06	0.000131966	4.9026e-06	0.00387108	0.000458775	0.00160037	0.000190691	0.00629807	0.0163656	0.392032
LDM — ajoene_z_21_LIDI_matrix
	S1	S2	S3	O4	C5	C6	C7	C8	C9	C10	C11	C12	C13	H14	H15	H16	H17	H18	H19	H20	H21	H22	H23	H24	H25	H26	H27
S1	12.9491	0.00329733	0.00113265	0.682139	0.464509	0.464155	0.0286094	0.0277404	0.0137454	0.0176667	0.00104087	0.000139201	5.35699e-05	0.0209794	0.0220337	0.0199877	0.0226602	0.00510347	0.00173835	0.000733893	0.000130043	0.00179526	0.000839913	0.00128317	3.62047e-05	4.47242e-06	7.73817e-06		92.29	31.7109
S2	0.00329733	14.5635	0.641516	0.00112195	0.0186627	0.00028003	0.0521151	0.00108921	0.571301	0.00281388	0.038096	0.00944485	0.00503116	0.024259	0.00132399	3.83423e-05	8.25654e-05	0.00893099	7.04589e-05	0.0295993	0.00418582	0.00575208	0.000110373	0.000264148	0.000459467	0.000246656	0.000481091
S3	0.00113265	0.641516	14.6402	0.00189233	0.00182068	0.000147448	0.0205409	0.000411851	0.0460273	0.000342016	0.5267	0.0431505	0.0214742	0.00116289	0.000676136	2.41931e-05	3.74126e-05	0.00162791	0.000685114	0.00539912	0.0298893	0.0239619	1.96445e-05	0.000193707	0.00546836	0.00134652	0.00112566
O4	0.682139	0.00112195	0.00189233	8.32991	0.0609303	0.0611549	0.0156561	0.014677	0.00559945	0.00310891	0.0130106	0.00128085	0.000551787	0.00289027	0.00823746	0.00828802	0.00319964	0.00158598	0.00978011	0.000178318	0.000563267	0.0287105	0.000427992	0.000253353	0.000327964	4.11529e-05	5.39908e-05
C5	0.464509	0.0186627	0.00182068	0.0609303	4.08109	0.0249658	0.518655	0.00751356	0.0342531	0.00493406	0.00074837	7.92107e-05	7.28549e-05	0.443918	0.465551	0.00449326	0.00477536	0.0191777	0.000209968	0.00542197	5.86097e-05	0.00131974	0.000461944	0.000156561	6.23675e-06	3.50772e-06	6.7356e-06
C6	0.464155	0.00028003	0.000147448	0.0611549	0.0249658	4.06659	0.00442601	0.517271	0.00156442	0.0373473	0.000162312	2.91563e-05	1.40716e-05	0.00451023	0.00246465	0.465729	0.46547	0.000311321	0.0185276	0.000154256	0.000189348	0.000169396	0.00622737	0.00632491	4.07182e-06	2.08892e-06	5.83764e-07
C7	0.0286094	0.0521151	0.0205409	0.0156561	0.518655	0.00442601	3.95042	0.000648885	0.882754	0.000489099	0.00146714	0.000422328	0.000510871	0.0161704	0.0193714	0.00054929	0.000991001	0.469355	2.35803e-05	0.0267839	0.000112355	0.00207546	7.02502e-05	1.56094e-05	1.62331e-05	1.91206e-05	3.20789e-05
C8	0.0277404	0.00108921	0.000411851	0.014677	0.00751356	0.517271	0.000648885	3.97006	0.000159762	0.912643	0.00335273	0.000333154	0.00012238	0.0109288	0.000458106	0.0177158	0.0190403	0.000234141	0.463797	1.97276e-05	0.00321111	0.00222269	0.0303835	0.0296682	3.14511e-05	1.65679e-05	6.70119e-06
C9	0.0137454	0.571301	0.0460273	0.00559945	0.0342531	0.00156442	0.882754	0.000159762	4.07954	0.000276591	0.00358076	0.000565186	0.000267932	0.00396298	0.00992578	0.000183392	0.000557513	0.0290969	1.40565e-05	0.468582	0.000430563	0.00310009	1.66794e-05	2.0887e-05	7.26497e-05	2.46808e-05	3.12948e-05
C10	0.0176667	0.00281388	0.000342016	0.00310891	0.00493406	0.0373473	0.000489099	0.912643	0.000276591	4.07498	0.00196647	0.000180278	5.27905e-05	0.0108837	0.000270966	0.00592563	0.00943086	0.000245303	0.0272658	6.62182e-05	0.00338857	0.000832401	0.481023	0.481656	4.61554e-05	2.03152e-05	4.36573e-06
C11	0.00104087	0.038096	0.5267	0.0130106	0.00074837	0.000162312	0.00146714	0.00335273	0.00358076	0.00196647	4.03329	0.51583	0.0377332	0.00095693	6.69796e-05	4.81878e-05	1.73758e-05	8.69645e-05	0.00300522	0.000333925	0.463755	0.436867	6.49127e-05	0.000764055	0.0193124	0.00641012	0.00640018
C12	0.000139201	0.00944485	0.0431505	0.00128085	7.92107e-05	2.91563e-05	0.000422328	0.000333154	0.000565186	0.000180278	0.51583	3.97227	0.91976	9.67421e-05	2.36065e-05	9.92481e-06	4.62229e-06	2.55118e-05	0.000522866	4.05373e-05	0.0185342	0.0169569	1.23969e-05	7.49918e-05	0.472645	0.0304914	0.0302596
C13	5.35699e-05	0.00503116	0.0214742	0.000551787	7.28549e-05	1.40716e-05	0.000510871	0.00012238	0.000267932	5.27905e-05	0.0377332	0.91976	4.086	6.20057e-05	1.09529e-05	4.94558e-06	2.27133e-06	2.66344e-05	0.000312509	1.2427e-05	0.00657667	0.00799106	4.92788e-06	2.43383e-05	0.0292257	0.481757	0.484226
H14	0.0209794	0.024259	0.00116289	0.00289027	0.443918	0.00451023	0.0161704	0.0109288	0.00396298	0.0108837	0.00095693	9.67421e-05	6.20057e-05	0.348289	0.0136035	0.000548309	0.000340555	0.00455529	0.000233	0.000313289	0.000160418	0.00105204	0.00109033	0.00027072	5.15375e-06	2.66075e-06	5.75693e-06
H15	0.0220337	0.00132399	0.000676136	0.00823746	0.465551	0.00246465	0.0193714	0.000458106	0.00992578	0.000270966	6.69796e-05	2.36065e-05	1.09529e-05	0.0136035	0.399987	0.00236039	0.000195024	0.00101796	7.02352e-05	0.000687173	4.76536e-06	0.000147883	7.59075e-05	1.10196e-05	6.85216e-07	6.64749e-07	1.61462e-06
H16	0.0199877	3.83423e-05	2.41931e-05	0.00828802	0.00449326	0.465729	0.00054929	0.0177158	0.000183392	0.00592563	4.81878e-05	9.92481e-06	4.94558e-06	0.000548309	0.00236039	0.400964	0.0148926	2.65804e-05	0.00489406	2.68551e-05	5.03887e-05	3.55799e-05	0.00379736	0.000435282	1.33845e-06	8.77195e-07	8.0502e-08
H17	0.0226602	8.25654e-05	3.74126e-05	0.00319964	0.00477536	0.46547	0.000991001	0.0190403	0.000557513	0.00943086	1.73758e-05	4.62229e-06	2.27133e-06	0.000340555	0.000195024	0.0148926	0.39207	1.3515e-05	0.0012398	5.86023e-05	2.56096e-05	1.25363e-05	0.000472976	0.000779525	4.83959e-07	3.05551e-07	1.49674e-07
H18	0.00510347	0.00893099	0.00162791	0.00158598	0.0191777	0.000311321	0.469355	0.000234141	0.0290969	0.000245303	8.69645e-05	2.55118e-05	2.66344e-05	0.00455529	0.00101796	2.65804e-05	1.3515e-05	0.401619	5.54926e-06	0.00354154	1.03411e-05	6.5401e-05	1.95369e-05	1.02585e-05	2.03573e-06	1.24419e-06	1.38305e-06
H19	0.00173835	7.04589e-05	0.000685114	0.00978011	0.000209968	0.0185276	2.35803e-05	0.463797	1.40565e-05	0.0272658	0.00300522	0.000522866	0.000312509	0.000233	7.02352e-05	0.00489406	0.0012398	5.54926e-06	0.380549	1.29346e-06	0.00186593	0.0016328	0.00646047	0.00349939	2.46095e-05	3.71907e-05	9.95996e-06
H20	0.000733893	0.0295993	0.00539912	0.000178318	0.00542197	0.000154256	0.0267839	1.97276e-05	0.468582	6.62182e-05	0.000333925	4.05373e-05	1.2427e-05	0.000313289	0.000687173	2.68551e-05	5.86023e-05	0.00354154	1.29346e-06	0.382282	0.000121929	6.90288e-05	3.0191e-06	5.82979e-06	1.20456e-05	2.2344e-06	2.1268e-06
H21	0.000130043	0.00418582	0.0298893	0.000563267	5.86097e-05	0.000189348	0.000112355	0.00321111	0.000430563	0.00338857	0.463755	0.0185342	0.00657667	0.000160418	4.76536e-06	5.03887e-05	2.56096e-05	1.03411e-05	0.00186593	0.000121929	0.404328	0.0132881	0.000159346	0.00162741	0.00497239	0.00411683	0.000474849
H22	0.00179526	0.00575208	0.0239619	0.0287105	0.00131974	0.000169396	0.00207546	0.00222269	0.00310009	0.000832401	0.436867	0.0169569	0.00799106	0.00105204	0.000147883	3.55799e-05	1.25363e-05	6.5401e-05	0.0016328	6.90288e-05	0.0132881	0.328507	3.97826e-05	6.56052e-05	0.00161834	0.000494686	0.000709373
H23	0.000839913	0.000110373	1.96445e-05	0.000427992	0.000461944	0.00622737	7.02502e-05	0.0303835	1.66794e-05	0.481023	6.49127e-05	1.23969e-05	4.92788e-06	0.00109033	7.59075e-05	0.00379736	0.000472976	1.95369e-05	0.00646047	3.0191e-06	0.000159346	3.97826e-05	0.415011	0.0167295	1.30314e-06	1.46185e-06	1.78333e-07
H24	0.00128317	0.000264148	0.000193707	0.000253353	0.000156561	0.00632491	1.56094e-05	0.0296682	2.0887e-05	0.481656	0.000764055	7.49918e-05	2.43383e-05	0.00027072	1.10196e-05	0.000435282	0.000779525	1.02585e-05	0.00349939	5.82979e-06	0.00162741	6.56052e-05	0.0167295	0.404845	4.70621e-05	2.9192e-05	2.26776e-06
H25	3.62047e-05	0.000459467	0.00546836	0.000327964	6.23675e-06	4.07182e-06	1.62331e-05	3.14511e-05	7.26497e-05	4.61554e-05	0.0193124	0.472645	0.0292257	5.15375e-06	6.85216e-07	1.33845e-06	4.83959e-07	2.03573e-06	2.46095e-05	1.20456e-05	0.00497239	0.00161834	1.30314e-06	4.70621e-05	0.406165	0.00679334	0.00361959
H26	4.47242e-06	0.000246656	0.00134652	4.11529e-05	3.50772e-06	2.08892e-06	1.91206e-05	1.65679e-05	2.46808e-05	2.03152e-05	0.00641012	0.0304914	0.481757	2.66075e-06	6.64749e-07	8.77195e-07	3.05551e-07	1.24419e-06	3.71907e-05	2.2344e-06	0.00411683	0.000494686	1.46185e-06	2.9192e-05	0.00679334	0.416186	0.0170502
H27	7.73817e-06	0.000481091	0.00112566	5.39908e-05	6.7356e-06	5.83764e-07	3.20789e-05	6.70119e-06	3.12948e-05	4.36573e-06	0.00640018	0.0302596	0.484226	5.75693e-06	1.61462e-06	8.0502e-08	1.49674e-07	1.38305e-06	9.95996e-06	2.1268e-06	0.000474849	0.000709373	1.78333e-07	2.26776e-06	0.00361959	0.0170502	0.412228
LDM — ajoene_z_22_LIDI_matrix
	S1	S2	S3	O4	C5	C6	C7	C8	C9	C10	C11	C12	C13	H14	H15	H16	H17	H18	H19	H20	H21	H22	H23	H24	H25	H26	H27
S1	12.9239	0.00281356	0.000503811	0.685456	0.463974	0.464635	0.0282016	0.0282686	0.0138181	0.017544	0.000146829	5.91445e-05	4.1718e-05	0.0226386	0.0184092	0.0222761	0.0245266	0.00327494	0.00130488	0.000918144	0.000207436	1.22143e-05	0.0008293	0.00090504	2.64611e-05	2.39774e-06	2.77752e-06		92.2552	31.7416
S2	0.00281356	14.5203	0.647246	0.00151686	0.0159201	0.000804096	0.0616112	0.00512291	0.574918	0.000499191	0.0370743	0.0081588	0.00161397	0.00165387	0.0179353	0.000219763	0.000510091	0.00881275	0.0136049	0.0281716	0.00492442	0.00851183	0.000231902	8.93598e-05	0.0108699	0.000447609	0.000206337
S3	0.000503811	0.647246	14.6273	0.000299543	0.00186937	0.00014577	0.0130394	0.000546881	0.0426444	0.00014284	0.530159	0.041814	0.019872	0.0003419	0.00144371	1.742e-05	0.000157386	0.00142289	0.000791928	0.011755	0.0291419	0.0256996	1.2819e-05	7.65392e-05	0.00429559	0.000917452	0.0015335
O4	0.685456	0.00151686	0.000299543	8.36795	0.0624774	0.0633556	0.0128174	0.0099288	0.00279606	0.00584935	4.79323e-05	2.45584e-05	1.07242e-05	0.0045027	0.00800145	0.00394074	0.00767623	0.0136033	0.000375637	0.000243851	6.16277e-05	3.67529e-06	0.000330069	0.000556456	1.64788e-05	6.74494e-07	1.39054e-06
C5	0.463974	0.0159201	0.00186937	0.0624774	4.07528	0.0229203	0.518587	0.00739697	0.0344357	0.00172821	0.000144075	3.43732e-05	1.77663e-05	0.461775	0.45685	0.00499682	0.00235715	0.0175823	0.00455796	0.00549663	7.68966e-05	2.4301e-05	0.000153091	6.10748e-05	3.99174e-05	2.38737e-06	1.99538e-06
C6	0.464635	0.000804096	0.00014577	0.0633556	0.0229203	4.07024	0.00976249	0.520564	0.00335207	0.0374934	0.000181576	0.000266646	7.70504e-05	0.00490576	0.00125274	0.464981	0.456094	0.000768094	0.0182252	0.000120034	0.000518112	1.57803e-05	0.00607448	0.00623252	0.000305798	7.11896e-06	1.13684e-05
C7	0.0282016	0.0616112	0.0130394	0.0128174	0.518587	0.00976249	3.96229	0.00215784	0.879343	0.000461081	0.001745	0.000226185	0.000232714	0.0194732	0.017056	0.000896847	0.0101395	0.459388	0.00267247	0.0255531	0.00100463	0.000337691	7.96915e-05	3.27425e-05	0.00023606	2.38202e-05	1.83655e-05
C8	0.0282686	0.00512291	0.000546881	0.0099288	0.00739697	0.520564	0.00215784	3.98206	0.00189625	0.916624	0.00307565	0.00362898	0.000765133	0.000733604	0.00684796	0.0179954	0.0180745	0.000141104	0.455961	4.37791e-05	0.0060797	0.000165312	0.0300421	0.0294301	0.00286916	6.21002e-05	4.02532e-05
C9	0.0138181	0.574918	0.0426444	0.00279606	0.0344357	0.00335207	0.879343	0.00189625	4.10677	0.000219117	0.00318025	0.000570554	0.000243758	0.010254	0.00383928	0.000236173	0.00447211	0.0278201	0.00369055	0.46557	0.00309536	0.000351206	9.34479e-05	3.45188e-05	0.000365572	2.87382e-05	2.96325e-05
C10	0.017544	0.000499191	0.00014284	0.00584935	0.00172821	0.0374934	0.000461081	0.916624	0.000219117	4.07923	0.000799906	0.00381521	0.00157292	0.000109925	0.00184498	0.00631946	0.00882031	8.13703e-05	0.0277369	9.51919e-06	0.00171519	6.32935e-05	0.480934	0.479276	0.00170251	4.35989e-05	0.00011258
C11	0.000146829	0.0370743	0.530159	4.79323e-05	0.000144075	0.000181576	0.001745	0.00307565	0.00318025	0.000799906	4.01445	0.514328	0.0367518	5.21458e-05	0.000114403	3.21138e-05	0.000172195	9.99368e-05	0.00454556	0.000311691	0.457205	0.463268	7.15093e-05	0.000221515	0.0188967	0.00626157	0.00630006
C12	5.91445e-05	0.0081588	0.041814	2.45584e-05	3.43732e-05	0.000266646	0.000226185	0.00362898	0.000570554	0.00381521	0.514328	3.96617	0.920629	7.71683e-06	3.53667e-05	6.6895e-05	6.06981e-05	1.62812e-05	0.00503848	0.000171799	0.0185577	0.0180253	0.000217505	0.00475035	0.465273	0.0304183	0.0304431
C13	4.1718e-05	0.00161397	0.019872	1.07242e-05	1.77663e-05	7.70504e-05	0.000232714	0.000765133	0.000243758	0.00157292	0.0367518	0.920629	4.08027	5.86925e-06	1.19303e-05	1.4464e-05	4.11186e-05	1.1082e-05	0.000765435	7.66736e-05	0.00963054	0.00643742	9.83322e-05	0.00289658	0.0285722	0.481388	0.483559
H14	0.0226386	0.00165387	0.0003419	0.0045027	0.461775	0.00490576	0.0194732	0.000733604	0.010254	0.000109925	5.21458e-05	7.71683e-06	5.86925e-06	0.383791	0.0142263	0.000909974	0.000180483	0.000724179	0.00040334	0.000701523	3.62513e-05	1.09496e-05	2.20499e-05	7.57188e-06	1.15999e-05	7.8732e-07	5.26904e-07
H15	0.0184092	0.0179353	0.00144371	0.00800145	0.45685	0.00125274	0.017056	0.00684796	0.00383928	0.00184498	0.000114403	3.53667e-05	1.19303e-05	0.0142263	0.379385	0.000173608	0.000131584	0.00459852	0.00539338	0.000262859	2.6936e-05	1.60319e-05	0.000124937	6.99263e-05	7.89067e-05	1.82797e-06	1.58361e-06
H16	0.0222761	0.000219763	1.742e-05	0.00394074	0.00499682	0.464981	0.000896847	0.0179954	0.000236173	0.00631946	3.21138e-05	6.6895e-05	1.4464e-05	0.000909974	0.000173608	0.3944	0.0142552	5.18564e-05	0.00453162	8.90303e-06	5.08932e-05	1.60747e-06	0.00360983	0.000429757	9.46239e-05	2.29792e-06	7.38763e-07
H17	0.0245266	0.000510091	0.000157386	0.00767623	0.00235715	0.456094	0.0101395	0.0180745	0.00447211	0.00882031	0.000172195	6.06981e-05	4.11186e-05	0.000180483	0.000131584	0.0142552	0.37707	0.00161036	0.00151191	0.000133124	0.000343991	1.84482e-05	0.000462776	0.00075057	1.785e-05	1.91728e-06	3.20762e-06
H18	0.00327494	0.00881275	0.00142289	0.0136033	0.0175823	0.000768094	0.459388	0.000141104	0.0278201	8.13703e-05	9.99368e-05	1.62812e-05	1.1082e-05	0.000724179	0.00459852	5.18564e-05	0.00161036	0.368459	8.60357e-05	0.0034375	4.3224e-05	1.77908e-05	4.07732e-06	6.01951e-06	1.31474e-05	1.26771e-06	1.00432e-06
H19	0.00130488	0.0136049	0.000791928	0.000375637	0.00455796	0.0182252	0.00267247	0.455961	0.00369055	0.0277369	0.00454556	0.00503848	0.000765435	0.00040334	0.00539338	0.00453162	0.00151191	8.60357e-05	0.386776	9.37826e-05	0.00607133	0.000341893	0.00623966	0.00346256	0.00507414	0.000120065	3.93108e-05
H20	0.000918144	0.0281716	0.011755	0.000243851	0.00549663	0.000120034	0.0255531	4.37791e-05	0.46557	9.51919e-06	0.000311691	0.000171799	7.66736e-05	0.000701523	0.000262859	8.90303e-06	0.000133124	0.0034375	9.37826e-05	0.373937	0.000191882	2.37947e-05	2.67903e-06	1.7785e-06	0.000120713	6.64948e-06	8.07752e-06
H21	0.000207436	0.00492442	0.0291419	6.16277e-05	7.68966e-05	0.000518112	0.00100463	0.0060797	0.00309536	0.00171519	0.457205	0.0185577	0.00963054	3.62513e-05	2.6936e-05	5.08932e-05	0.000343991	4.3224e-05	0.00607133	0.000191882	0.383921	0.014208	0.000123111	0.000109985	0.000844164	0.000426337	0.000741427
H22	1.22143e-05	0.00851183	0.0256996	3.67529e-06	2.4301e-05	1.57803e-05	0.000337691	0.000165312	0.000351206	6.32935e-05	0.463268	0.0180253	0.00643742	1.09496e-05	1.60319e-05	1.60747e-06	1.84482e-05	1.77908e-05	0.000341893	2.37947e-05	0.014208	0.395438	9.74554e-06	4.70781e-05	0.00505232	0.00417723	0.000483202
H23	0.0008293	0.000231902	1.2819e-05	0.000330069	0.000153091	0.00607448	7.96915e-05	0.0300421	9.34479e-05	0.480934	7.15093e-05	0.000217505	9.83322e-05	2.20499e-05	0.000124937	0.00360983	0.000462776	4.07732e-06	0.00623966	2.67903e-06	0.000123111	9.74554e-06	0.410375	0.0163142	0.000162875	2.50935e-06	1.20629e-05
H24	0.00090504	8.93598e-05	7.65392e-05	0.000556456	6.10748e-05	0.00623252	3.27425e-05	0.0294301	3.45188e-05	0.479276	0.000221515	0.00475035	0.00289658	7.57188e-06	6.99263e-05	0.000429757	0.00075057	6.01951e-06	0.00346256	1.7785e-06	0.000109985	4.70781e-05	0.0163142	0.3998	0.00216159	9.47615e-05	0.00028923
H25	2.64611e-05	0.0108699	0.00429559	1.64788e-05	3.99174e-05	0.000305798	0.00023606	0.00286916	0.000365572	0.00170251	0.0188967	0.465273	0.0285722	1.15999e-05	7.89067e-05	9.46239e-05	1.785e-05	1.31474e-05	0.00507414	0.000120713	0.000844164	0.00505232	0.000162875	0.00216159	0.401595	0.00651336	0.00362721
H26	2.39774e-06	0.000447609	0.000917452	6.74494e-07	2.38737e-06	7.11896e-06	2.38202e-05	6.21002e-05	2.87382e-05	4.35989e-05	0.00626157	0.0304183	0.481388	7.8732e-07	1.82797e-06	2.29792e-06	1.91728e-06	1.26771e-06	0.000120065	6.64948e-06	0.000426337	0.00417723	2.50935e-06	9.47615e-05	0.00651336	0.414185	0.0168611
H27	2.77752e-06	0.000206337	0.0015335	1.39054e-06	1.99538e-06	1.13684e-05	1.83655e-05	4.02532e-05	2.96325e-05	0.00011258	0.00630006	0.0304431	0.483559	5.26904e-07	1.58361e-06	7.38763e-07	3.20762e-06	1.00432e-06	3.93108e-05	8.07752e-06	0.000741427	0.000483202	1.20629e-05	0.00028923	0.00362721	0.0168611	0.409884
LDM — ajoene_z_23_LIDI_matrix
	S1	S2	S3	O4	C5	C6	C7	C8	C9	C10	C11	C12	C13	H14	H15	H16	H17	H18	H19	H20	H21	H22	H23	H24	H25	H26	H27
S1	12.9346	0.00270517	0.000404422	0.68579	0.464791	0.463662	0.0279295	0.0302752	0.0126279	0.0164663	9.73108e-05	0.000214341	3.99936e-05	0.0224404	0.0184801	0.02301	0.022088	0.00368277	0.00311093	0.000932585	3.31364e-05	2.2716e-05	0.000714107	0.00087881	0.000599609	1.74996e-05	8.83589e-06		92.2577	31.7428
S2	0.00270517	14.5177	0.651979	0.00154282	0.0156532	0.000531436	0.0635973	0.00119692	0.574855	0.00736592	0.0377336	0.00552107	0.00152099	0.00182739	0.0159599	0.00083519	5.27564e-05	0.00879371	0.000245874	0.0275995	0.00802728	0.00730469	0.0153263	0.000397501	0.00442741	0.000171284	0.00030183
S3	0.000404422	0.651979	14.6258	0.000372012	0.00187807	8.28873e-05	0.0108725	6.32779e-05	0.0412	0.000409715	0.529239	0.0411207	0.0211683	0.000252076	0.00148305	0.000107412	7.29264e-06	0.00135134	1.38025e-05	0.0127765	0.0257498	0.0296723	0.000882401	2.77936e-05	0.00275524	0.00148211	0.000967257
O4	0.68579	0.00154282	0.000372012	8.36179	0.0616081	0.0628014	0.0166471	0.00949196	0.0026362	0.00585304	2.78122e-05	4.04793e-05	1.07347e-05	0.003293	0.00769042	0.00408856	0.00680923	0.0180831	0.000563409	0.000277477	8.78585e-06	1.18206e-05	0.000293786	0.000570226	0.000101648	7.20701e-06	1.71041e-06
C5	0.464791	0.0156532	0.00187807	0.0616081	4.0773	0.0240119	0.517477	0.00557679	0.0349934	0.00503128	0.000122761	9.48907e-05	3.15449e-05	0.463422	0.454825	0.00444448	0.00423999	0.017362	0.000278265	0.00549205	3.97936e-05	2.8829e-05	0.000844832	0.000124695	0.000194438	2.74486e-06	4.66397e-06
C6	0.463662	0.000531436	8.28873e-05	0.0628014	0.0240119	4.07191	0.00785916	0.520361	0.00302515	0.0369528	9.5301e-05	0.000766139	8.743e-05	0.00500376	0.00248268	0.454716	0.463729	0.000307017	0.0197304	0.000111103	2.16216e-05	4.29619e-05	0.00542104	0.0063266	0.00283143	3.6643e-05	3.02657e-05
C7	0.0279295	0.0635973	0.0108725	0.0166471	0.517477	0.00785916	3.96641	0.000661721	0.879586	0.000525055	0.00171196	0.00127075	0.000515962	0.019576	0.0167375	0.0115702	0.000595035	0.456679	0.000195606	0.0250014	0.000672352	0.000177396	0.000575359	2.93786e-05	0.00332214	2.51406e-05	8.06893e-05
C8	0.0302752	0.00119692	6.32779e-05	0.00949196	0.00557679	0.520361	0.000661721	3.98083	0.000293749	0.915614	0.000162578	0.000431769	8.83763e-05	0.000628342	0.00711046	0.0174088	0.018594	0.000101825	0.474254	1.59818e-05	1.11851e-05	0.000450738	0.0285663	0.0299391	0.0005734	7.80714e-06	8.7575e-06
C9	0.0126279	0.574855	0.0412	0.0026362	0.0349934	0.00302515	0.879586	0.000293749	4.10612	0.000537282	0.00205795	0.0054792	0.000879066	0.0104896	0.00399887	0.00567857	0.000213023	0.0275766	0.000154226	0.463631	0.0004433	0.000299281	0.00108969	5.08618e-05	0.00931908	7.70261e-05	0.000184452
C10	0.0164663	0.00736592	0.000409715	0.00585304	0.00503128	0.0369528	0.000525055	0.915614	0.000537282	4.08051	0.00125821	0.00199232	0.000316005	0.000464564	0.00916444	0.00557861	0.00831399	0.000109102	0.0296447	5.01219e-05	6.34642e-05	0.00289208	0.467232	0.483066	0.00271306	1.8404e-05	4.93334e-05
C11	9.73108e-05	0.0377336	0.529239	2.78122e-05	0.000122761	9.5301e-05	0.00171196	0.000162578	0.00205795	0.00125821	4.013	0.515684	0.0369628	4.81755e-05	8.63948e-05	0.000301999	5.34785e-06	9.88628e-05	5.88327e-05	0.000338957	0.463289	0.460716	0.00369526	6.78764e-05	0.0187738	0.00629013	0.00631388
C12	0.000214341	0.00552107	0.0411207	4.04793e-05	9.48907e-05	0.000766139	0.00127075	0.000431769	0.0054792	0.00199232	0.515684	3.97169	0.922464	4.43646e-05	1.65121e-05	0.0027148	5.14544e-05	5.59506e-05	9.57869e-05	0.00121433	0.0181713	0.0189699	0.00411436	0.000124145	0.462233	0.0302482	0.0304976
C13	3.99936e-05	0.00152099	0.0211683	1.07347e-05	3.15449e-05	8.743e-05	0.000515962	8.83763e-05	0.000879066	0.000316005	0.0369628	0.922464	4.07997	1.66192e-05	6.20517e-06	0.00029941	6.57721e-06	3.56973e-05	1.13743e-05	0.000401916	0.0064728	0.00927881	0.000713039	2.08561e-05	0.0284651	0.483214	0.481249
H14	0.0224404	0.00182739	0.000252076	0.003293	0.463422	0.00500376	0.019576	0.000628342	0.0104896	0.000464564	4.81755e-05	4.43646e-05	1.66192e-05	0.387902	0.0142553	0.000353578	0.000980911	0.000628403	1.65379e-05	0.000670487	2.31327e-05	5.51176e-06	0.000116647	1.32348e-05	9.93519e-05	8.63473e-07	3.1243e-06
H15	0.0184801	0.0159599	0.00148305	0.00769042	0.454825	0.00248268	0.0167375	0.00711046	0.00399887	0.00916444	8.63948e-05	1.65121e-05	6.20517e-06	0.0142553	0.372679	0.000266892	0.000293496	0.00432996	0.000152917	0.000251982	1.427e-05	3.31819e-05	0.00180317	0.000235358	2.63494e-05	5.41864e-07	7.44809e-07
H16	0.02301	0.00083519	0.000107412	0.00408856	0.00444448	0.454716	0.0115702	0.0174088	0.00567857	0.00557861	0.000301999	0.0027148	0.00029941	0.000353578	0.000266892	0.379992	0.0141497	0.000677292	0.00451663	0.000134941	9.8859e-05	2.9355e-05	0.00258621	0.000363255	0.00602922	6.83111e-05	0.000103513
H17	0.022088	5.27564e-05	7.29264e-06	0.00680923	0.00423999	0.463729	0.000595035	0.018594	0.000213023	0.00831399	5.34785e-06	5.14544e-05	6.57721e-06	0.000980911	0.000293496	0.0141497	0.386899	2.26565e-05	0.00192821	6.81606e-06	1.28014e-06	6.36749e-06	0.000444347	0.000795372	0.00016015	2.3705e-06	2.49762e-06
H18	0.00368277	0.00879371	0.00135134	0.0180831	0.017362	0.000307017	0.456679	0.000101825	0.0275766	0.000109102	9.88628e-05	5.59506e-05	3.56973e-05	0.000628403	0.00432996	0.000677292	2.26565e-05	0.360267	1.51167e-05	0.00340719	3.87717e-05	8.82759e-06	2.07031e-05	3.24648e-06	8.60675e-05	1.92756e-06	3.4103e-06
H19	0.00311093	0.000245874	1.38025e-05	0.000563409	0.000278265	0.0197304	0.000195606	0.474254	0.000154226	0.0296447	5.88327e-05	9.57869e-05	1.13743e-05	1.65379e-05	0.000152917	0.00451663	0.00192821	1.51167e-05	0.410107	6.07413e-06	2.76737e-06	0.000121409	0.00626642	0.003715	0.000162253	2.53881e-06	3.44307e-06
H20	0.000932585	0.0275995	0.0127765	0.000277477	0.00549205	0.000111103	0.0250014	1.59818e-05	0.463631	5.01219e-05	0.000338957	0.00121433	0.000401916	0.000670487	0.000251982	0.000134941	6.81606e-06	0.00340719	6.07413e-06	0.369355	2.82406e-05	0.000170161	7.37483e-05	2.92114e-06	0.000869528	1.65276e-05	1.95406e-05
H21	3.31364e-05	0.00802728	0.0257498	8.78585e-06	3.97936e-05	2.16216e-05	0.000672352	1.11851e-05	0.0004433	6.34642e-05	0.463289	0.0181713	0.0064728	2.31327e-05	1.427e-05	9.8859e-05	1.28014e-06	3.87717e-05	2.76737e-06	2.82406e-05	0.396254	0.0143401	0.000250347	2.8357e-06	0.00489846	0.000483253	0.00426993
H22	2.2716e-05	0.00730469	0.0296723	1.18206e-05	2.8829e-05	4.29619e-05	0.000177396	0.000450738	0.000299281	0.00289208	0.460716	0.0189699	0.00927881	5.51176e-06	3.31819e-05	2.9355e-05	6.36749e-06	8.82759e-06	0.000121409	0.000170161	0.0143401	0.389357	0.00519958	0.000159157	0.00110582	0.000769662	0.000437636
H23	0.000714107	0.0153263	0.000882401	0.000293786	0.000844832	0.00542104	0.000575359	0.0285663	0.00108969	0.467232	0.00369526	0.00411436	0.000713039	0.000116647	0.00180317	0.00258621	0.000444347	2.07031e-05	0.00626642	7.37483e-05	0.000250347	0.00519958	0.38992	0.0159512	0.00462292	3.61173e-05	0.000115199
H24	0.00087881	0.000397501	2.77936e-05	0.000570226	0.000124695	0.0063266	2.93786e-05	0.0299391	5.08618e-05	0.483066	6.78764e-05	0.000124145	2.08561e-05	1.32348e-05	0.000235358	0.000363255	0.000795372	3.24648e-06	0.003715	2.92114e-06	2.8357e-06	0.000159157	0.0159512	0.407255	0.000233122	1.29991e-06	4.39227e-06
H25	0.000599609	0.00442741	0.00275524	0.000101648	0.000194438	0.00283143	0.00332214	0.0005734	0.00931908	0.00271306	0.0187738	0.462233	0.0284651	9.93519e-05	2.63494e-05	0.00602922	0.00016015	8.60675e-05	0.000162253	0.000869528	0.00489846	0.00110582	0.00462292	0.000233122	0.398032	0.00357948	0.00636689
H26	1.74996e-05	0.000171284	0.00148211	7.20701e-06	2.74486e-06	3.6643e-05	2.51406e-05	7.80714e-06	7.70261e-05	1.8404e-05	0.00629013	0.0302482	0.483214	8.63473e-07	5.41864e-07	6.83111e-05	2.3705e-06	1.92756e-06	2.53881e-06	1.65276e-05	0.000483253	0.000769662	3.61173e-05	1.29991e-06	0.00357948	0.407984	0.0167999
H27	8.83589e-06	0.00030183	0.000967257	1.71041e-06	4.66397e-06	3.02657e-05	8.06893e-05	8.7575e-06	0.000184452	4.93334e-05	0.00631388	0.0304976	0.481249	3.1243e-06	7.44809e-07	0.000103513	2.49762e-06	3.4103e-06	3.44307e-06	1.95406e-05	0.00426993	0.000437636	0.000115199	4.39227e-06	0.00636689	0.0167999	0.414144
LDM — ajoene_z_24_LIDI_matrix
	S1	S2	S3	O4	C5	C6	C7	C8	C9	C10	C11	C12	C13	H14	H15	H16	H17	H18	H19	H20	H21	H22	H23	H24	H25	H26	H27
S1	12.9317	0.003358	0.000353104	0.68641	0.460348	0.462652	0.0277041	0.0306062	0.0164354	0.0190726	0.000106204	0.000601848	0.00113604	0.0220464	0.0195725	0.02233	0.0203543	0.00189161	0.00194313	0.000965995	4.05686e-05	1.55721e-05	0.000958379	0.000923417	3.07196e-05	0.000555089	0.000156065		92.2462	31.7531
S2	0.003358	14.5261	0.654491	0.00138931	0.0153332	0.00434865	0.0639871	0.000473441	0.573607	0.000216953	0.0386306	0.00953725	0.00543372	0.00159666	0.0168253	0.00277522	0.00615364	0.0090899	3.07372e-05	0.0270404	0.0085124	0.00652788	2.68765e-05	1.72589e-05	0.000550472	0.000907239	0.000213283
S3	0.000353104	0.654491	14.624	0.000284124	0.00198606	0.000354596	0.00916184	5.54737e-05	0.0403754	4.96851e-05	0.528735	0.0390555	0.0199569	0.000210275	0.00189962	0.00038831	0.000408747	0.00135254	7.25305e-06	0.0143865	0.0273798	0.0291307	3.29686e-06	3.53881e-05	0.00695427	0.00120384	0.00146486
O4	0.68641	0.00138931	0.000284124	8.35664	0.06193	0.062391	0.0148756	0.0119269	0.00312842	0.012266	2.85251e-05	0.000117898	0.000261668	0.00348078	0.00818969	0.00560038	0.00842924	0.0100024	0.000447556	0.000222753	1.25377e-05	9.18639e-06	0.000471484	0.00379088	1.02681e-05	0.000279915	9.62559e-05
C5	0.460348	0.0153332	0.00198606	0.06193	4.06587	0.0248192	0.517996	0.00493765	0.0351102	0.0025076	0.000123741	9.98033e-05	0.000156333	0.464862	0.46206	0.00326518	0.00384287	0.0177771	0.000249374	0.00547277	4.91986e-05	2.48792e-05	0.000212952	0.00017576	2.65991e-05	2.09008e-05	2.82748e-05
C6	0.462652	0.00434865	0.000354596	0.062391	0.0248192	4.07234	0.00847348	0.518867	0.00493359	0.0369173	0.000146646	0.00215212	0.00734819	0.00469124	0.00385768	0.44363	0.466044	0.000193005	0.0200802	0.000140865	5.50757e-05	3.18538e-05	0.00632341	0.00587863	0.000107378	0.00330082	0.000703452
C7	0.0277041	0.0639871	0.00916184	0.0148756	0.517996	0.00847348	3.95373	0.000886149	0.878057	0.000184072	0.00170794	0.00108884	0.00161212	0.0194241	0.0171506	0.011346	0.000535009	0.463441	0.000234858	0.0246449	0.000467787	0.000197978	1.49258e-05	5.11339e-05	8.3141e-05	0.000110689	6.71041e-05
C8	0.0306062	0.000473441	5.54737e-05	0.0119269	0.00493765	0.518867	0.000886149	3.97592	0.000490272	0.913241	3.30854e-05	0.000461683	0.00321434	0.0010285	0.00039161	0.0166774	0.0183924	2.52795e-05	0.476114	1.27396e-05	5.3105e-06	9.16506e-06	0.0301053	0.0289141	6.06417e-05	0.00314303	0.00147033
C9	0.0164354	0.573607	0.0403754	0.00312842	0.0351102	0.00493359	0.878057	0.000490272	4.10045	0.000534544	0.00204465	0.00635169	0.0041067	0.00875589	0.00372868	0.00895518	0.000376978	0.0286012	0.000158568	0.463343	0.000444535	0.00030086	2.61976e-05	4.43621e-05	0.000810596	0.000129828	0.000143635
C10	0.0190726	0.000216953	4.96851e-05	0.012266	0.0025076	0.0369173	0.000184072	0.913241	0.000534544	4.06669	6.24155e-05	0.000440684	0.00338844	0.000658324	0.000175165	0.00640737	0.00666188	1.33175e-05	0.0300356	1.96949e-05	6.46348e-06	6.89055e-06	0.483611	0.476309	2.67199e-05	0.00184683	0.00414283
C11	0.000106204	0.0386306	0.528735	2.85251e-05	0.000123741	0.000146646	0.00170794	3.30854e-05	0.00204465	6.24155e-05	4.01325	0.516799	0.0367731	3.78478e-05	9.39205e-05	0.000212347	0.000103743	0.000106307	3.1445e-06	0.000376679	0.462448	0.46341	2.00632e-06	6.97275e-05	0.0198251	0.00626925	0.00615111
C12	0.000601848	0.00953725	0.0390555	0.000117898	9.98033e-05	0.00215212	0.00108884	0.000461683	0.00635169	0.000440684	0.516799	3.97038	0.91174	2.46019e-05	1.45856e-05	0.00429148	0.000126322	5.25947e-05	4.5463e-05	0.00207213	0.019371	0.0182707	8.56921e-06	0.000235132	0.472375	0.029161	0.0293861
C13	0.00113604	0.00543372	0.0199569	0.000261668	0.000156333	0.00734819	0.00161212	0.00321434	0.0041067	0.00338844	0.0367731	0.91174	4.06872	5.13801e-05	1.89947e-05	0.0125617	0.000716236	5.43821e-05	0.000128268	0.000619672	0.00983777	0.0063723	7.4552e-05	0.00181343	0.0287918	0.475497	0.478381
H14	0.0220464	0.00159666	0.000210275	0.00348078	0.464862	0.00469124	0.0194241	0.0010285	0.00875589	0.000658324	3.78478e-05	2.46019e-05	5.13801e-05	0.390937	0.0148654	0.000208427	0.000340497	0.00135571	3.59349e-05	0.000676429	1.42914e-05	5.72272e-06	6.19356e-05	3.09424e-05	1.058e-06	1.02679e-05	4.64659e-06
H15	0.0195725	0.0168253	0.00189962	0.00818969	0.46206	0.00385768	0.0171506	0.00039161	0.00372868	0.000175165	9.39205e-05	1.45856e-05	1.89947e-05	0.0148654	0.394789	0.000182891	0.00334848	0.00475198	1.389e-05	0.000232364	3.96524e-05	2.39374e-05	2.58329e-05	1.21075e-05	3.03166e-06	5.9851e-06	2.19711e-06
H16	0.02233	0.00277522	0.00038831	0.00560038	0.00326518	0.44363	0.011346	0.0166774	0.00895518	0.00640737	0.000212347	0.00429148	0.0125617	0.000208427	0.000182891	0.354683	0.0139543	0.000361949	0.00388761	0.000184535	0.000115181	1.88865e-05	0.000416023	0.00282462	0.000124486	0.00189833	0.0016163
H17	0.0203543	0.00615364	0.000408747	0.00842924	0.00384287	0.466044	0.000535009	0.0183924	0.000376978	0.00666188	0.000103743	0.000126322	0.000716236	0.000340497	0.00334848	0.0139543	0.402729	6.48408e-05	0.00235947	3.23985e-05	6.19907e-06	5.57565e-05	0.000826806	0.000432926	2.92489e-05	0.000842249	0.000100262
H18	0.00189161	0.0090899	0.00135254	0.0100024	0.0177771	0.000193005	0.463441	2.52795e-05	0.0286012	1.33175e-05	0.000106307	5.25947e-05	5.43821e-05	0.00135571	0.00475198	0.000361949	6.48408e-05	0.375372	5.63798e-06	0.00351916	3.70789e-05	1.12964e-05	8.93684e-07	7.32344e-06	1.54853e-05	4.00755e-06	3.57412e-06
H19	0.00194313	3.07372e-05	7.25305e-06	0.000447556	0.000249374	0.0200802	0.000234858	0.476114	0.000158568	0.0300356	3.1445e-06	4.5463e-05	0.000128268	3.59349e-05	1.389e-05	0.00388761	0.00235947	5.63798e-06	0.416954	4.32129e-06	6.98044e-07	2.40441e-07	0.00369531	0.00666991	1.8622e-06	6.34431e-05	0.000107645
H20	0.000965995	0.0270404	0.0143865	0.000222753	0.00547277	0.000140865	0.0246449	1.27396e-05	0.463343	1.96949e-05	0.000376679	0.00207213	0.000619672	0.000676429	0.000232364	0.000184535	3.23985e-05	0.00351916	4.32129e-06	0.369923	3.20835e-05	0.000192941	8.77566e-07	1.3696e-06	0.00100318	3.65671e-05	2.48103e-05
H21	4.05686e-05	0.0085124	0.0273798	1.25377e-05	4.91986e-05	5.50757e-05	0.000467787	5.3105e-06	0.000444535	6.46348e-06	0.462448	0.019371	0.00983777	1.42914e-05	3.96524e-05	0.000115181	6.19907e-06	3.70789e-05	6.98044e-07	3.20835e-05	0.3943	0.0144568	1.89305e-07	3.21257e-06	0.00123561	0.000471424	0.000765247
H22	1.55721e-05	0.00652788	0.0291307	9.18639e-06	2.48792e-05	3.18538e-05	0.000197978	9.16506e-06	0.00030086	6.89055e-06	0.46341	0.0182707	0.0063723	5.72272e-06	2.39374e-05	1.88865e-05	5.57565e-05	1.12964e-05	2.40441e-07	0.000192941	0.0144568	0.393336	2.91859e-07	2.41108e-06	0.00520232	0.00424869	0.000464299
H23	0.000958379	2.68765e-05	3.29686e-06	0.000471484	0.000212952	0.00632341	1.49258e-05	0.0301053	2.61976e-05	0.483611	2.00632e-06	8.56921e-06	7.4552e-05	6.19356e-05	2.58329e-05	0.000416023	0.000826806	8.93684e-07	0.00369531	8.77566e-07	1.89305e-07	2.91859e-07	0.410809	0.0164293	7.11996e-07	4.10395e-05	0.000170479
H24	0.000923417	1.72589e-05	3.53881e-05	0.00379088	0.00017576	0.00587863	5.11339e-05	0.0289141	4.43621e-05	0.476309	6.97275e-05	0.000235132	0.00181343	3.09424e-05	1.21075e-05	0.00282462	0.000432926	7.32344e-06	0.00666991	1.3696e-06	3.21257e-06	2.41108e-06	0.0164293	0.400244	2.22553e-05	0.000134113	0.00309284
H25	3.07196e-05	0.000550472	0.00695427	1.02681e-05	2.65991e-05	0.000107378	8.3141e-05	6.06417e-05	0.000810596	2.67199e-05	0.0198251	0.472375	0.0287918	1.058e-06	3.03166e-06	0.000124486	2.92489e-05	1.54853e-05	1.8622e-06	0.00100318	0.00123561	0.00520232	7.11996e-07	2.22553e-05	0.410822	0.00664148	0.00359039
H26	0.000555089	0.000907239	0.00120384	0.000279915	2.09008e-05	0.00330082	0.000110689	0.00314303	0.000129828	0.00184683	0.00626925	0.029161	0.475497	1.02679e-05	5.9851e-06	0.00189833	0.000842249	4.00755e-06	6.34431e-05	3.65671e-05	0.000471424	0.00424869	4.10395e-05	0.000134113	0.00664148	0.404074	0.0164212
H27	0.000156065	0.000213283	0.00146486	9.62559e-05	2.82748e-05	0.000703452	6.71041e-05	0.00147033	0.000143635	0.00414283	0.00615111	0.0293861	0.478381	4.64659e-06	2.19711e-06	0.0016163	0.000100262	3.57412e-06	0.000107645	2.48103e-05	0.000765247	0.000464299	0.000170479	0.00309284	0.00359039	0.0164212	0.401553
LDM — ajoene_z_25_LIDI_matrix
	S1	S2	S3	O4	C5	C6	C7	C8	C9	C10	C11	C12	C13	H14	H15	H16	H17	H18	H19	H20	H21	H22	H23	H24	H25	H26	H27
S1	12.914	0.00229517	0.00105168	0.684995	0.461918	0.464351	0.0284408	0.0309967	0.0159484	0.0207521	7.66882e-05	0.000114228	0.000331824	0.0176134	0.0227171	0.0242582	0.0225422	0.00232249	0.00124877	0.0012092	9.25093e-05	2.16836e-05	0.00090724	0.00148345	1.13196e-05	1.24613e-05	0.000614286		92.2742	31.7262
S2	0.00229517	14.5247	0.640446	0.00126934	0.015994	0.000889708	0.0547011	0.00717411	0.571894	0.000787266	0.0377274	0.0160171	0.0112046	0.0181742	0.00151356	0.000855533	0.000158643	0.00860679	0.0183993	0.029359	0.00361309	0.00880573	0.000116359	0.000331412	0.000592863	0.000321812	0.000777529
S3	0.00105168	0.640446	14.6351	0.000375267	0.0017168	0.000148261	0.0187568	0.0009785	0.0447093	0.000109004	0.528768	0.0399179	0.0217831	0.0011256	0.000530976	0.000186022	2.33907e-05	0.00150613	0.00193819	0.00758222	0.0290154	0.026827	2.28712e-05	6.44295e-05	0.00700478	0.00154606	0.0012961
O4	0.684995	0.00126934	0.000375267	8.36982	0.0626985	0.0625406	0.014649	0.0103787	0.00307768	0.00659912	2.97168e-05	7.6951e-05	0.000214275	0.00773498	0.0041225	0.00586206	0.00469344	0.0125085	0.000554204	0.000246939	2.73376e-05	6.80511e-06	0.000496118	0.000450212	7.157e-06	6.42201e-06	0.000280848
C5	0.461918	0.015994	0.0017168	0.0626985	4.07636	0.0233444	0.518921	0.00659245	0.0337213	0.00198805	0.000291048	0.000693675	0.0034418	0.452962	0.461864	0.00283069	0.00495411	0.0177295	0.00241664	0.00542311	0.000362522	4.08954e-05	6.56194e-05	0.000141524	9.02039e-05	0.000135639	0.00522087
C6	0.464351	0.000889708	0.000148261	0.0625406	0.0233444	4.07442	0.00808385	0.519648	0.00398077	0.0376375	1.74878e-05	7.32019e-06	3.34971e-05	0.00153967	0.00494919	0.458762	0.463869	0.000215784	0.0189263	0.00011026	2.7635e-05	3.10046e-06	0.00635752	0.00614355	2.19575e-06	2.24403e-06	0.000108515
C7	0.0284408	0.0547011	0.0187568	0.014649	0.518921	0.00808385	3.95899	0.000923444	0.877021	0.000367478	0.00230157	0.000301903	0.000503079	0.016482	0.0200919	0.00954749	0.000791164	0.460712	0.000640339	0.0261891	0.00363492	0.000399828	3.23562e-05	5.67955e-05	9.88069e-05	3.27864e-05	0.00063993
C8	0.0309967	0.00717411	0.0009785	0.0103787	0.00659245	0.519648	0.000923444	3.983	0.000694393	0.917895	3.34789e-05	1.78773e-05	3.51618e-05	0.00694027	0.000606013	0.0176843	0.0181084	0.000103782	0.464667	3.25256e-05	3.41513e-06	2.43073e-05	0.0299516	0.0300849	6.64786e-07	3.00528e-06	1.19477e-05
C9	0.0159484	0.571894	0.0447093	0.00307768	0.0337213	0.00398077	0.877021	0.000694393	4.09784	0.000148849	0.00479386	0.000721568	0.00038588	0.00333917	0.00948324	0.00699176	0.000332821	0.027718	0.00127817	0.467521	0.00551889	0.000545327	3.02789e-05	5.04412e-05	0.000162846	1.6526e-05	0.000286027
C10	0.0207521	0.000787266	0.000109004	0.00659912	0.00198805	0.0376375	0.000367478	0.917895	0.000148849	4.08078	6.40649e-06	3.70186e-06	1.60297e-05	0.00214511	0.00012785	0.00665194	0.00711679	6.67651e-05	0.0287555	8.26246e-06	1.49675e-06	2.83299e-06	0.483118	0.480966	3.32531e-07	1.93612e-06	1.43328e-05
C11	7.66882e-05	0.0377274	0.528768	2.97168e-05	0.000291048	1.74878e-05	0.00230157	3.34789e-05	0.00479386	6.40649e-06	4.01344	0.517017	0.036884	0.000234387	0.000117947	3.20953e-05	2.39487e-06	9.95939e-05	0.000114004	0.000294814	0.460861	0.463178	9.44895e-07	2.01936e-06	0.0197508	0.00625793	0.00632313
C12	0.000114228	0.0160171	0.0399179	7.6951e-05	0.000693675	7.32019e-06	0.000301903	1.78773e-05	0.000721568	3.70186e-06	0.517017	3.96375	0.915797	0.00169842	0.000221363	4.07915e-06	2.20364e-06	2.11393e-05	3.72178e-05	0.000210925	0.0182333	0.0191776	5.31712e-07	8.7505e-07	0.472525	0.0300407	0.0300562
C13	0.000331824	0.0112046	0.0217831	0.000214275	0.0034418	3.34971e-05	0.000503079	3.51618e-05	0.00038588	1.60297e-05	0.036884	0.915797	4.07834	0.00473403	0.00170994	7.44624e-06	1.11698e-05	6.22751e-05	4.61112e-05	0.000115449	0.00627328	0.00943143	9.00712e-07	8.3783e-07	0.028829	0.483481	0.477123
H14	0.0176134	0.0181742	0.0011256	0.00773498	0.452962	0.00153967	0.016482	0.00694027	0.00333917	0.00214511	0.000234387	0.00169842	0.00473403	0.365572	0.0136808	0.000100021	0.000189366	0.00459871	0.00373219	0.000244077	3.94097e-05	6.27966e-05	7.05652e-05	0.000109351	6.45318e-05	0.000157843	0.00246626
H15	0.0227171	0.00151356	0.000530976	0.0041225	0.461864	0.00494919	0.0200919	0.000606013	0.00948324	0.00012785	0.000117947	0.000221363	0.00170994	0.0136808	0.391405	0.000202464	0.000931677	0.00118963	0.000194209	0.000535701	0.000119325	1.58157e-05	6.02995e-06	1.3343e-05	0.000107983	0.000125314	0.00355663
H16	0.0242582	0.000855533	0.000186022	0.00586206	0.00283069	0.458762	0.00954749	0.0176843	0.00699176	0.00665194	3.20953e-05	4.07915e-06	7.44624e-06	0.000100021	0.000202464	0.378103	0.0142734	0.00046082	0.00206041	0.00016344	2.93658e-05	7.9162e-06	0.000805461	0.000435842	8.71824e-07	3.80607e-07	9.87839e-06
H17	0.0225422	0.000158643	2.33907e-05	0.00469344	0.00495411	0.463869	0.000791164	0.0181084	0.000332821	0.00711679	2.39487e-06	2.20364e-06	1.11698e-05	0.000189366	0.000931677	0.0142734	0.390549	1.93756e-05	0.00414875	1.09774e-05	5.04512e-06	3.40613e-07	0.000467367	0.00317958	6.72518e-07	9.46886e-07	3.73209e-05
H18	0.00232249	0.00860679	0.00150613	0.0125085	0.0177295	0.000215784	0.460712	0.000103782	0.027718	6.67651e-05	9.95939e-05	2.11393e-05	6.22751e-05	0.00459871	0.00118963	0.00046082	1.93756e-05	0.370391	4.8556e-05	0.00342112	9.15755e-05	1.69935e-05	3.30396e-06	3.36799e-06	4.21262e-06	1.70182e-06	2.91391e-05
H19	0.00124877	0.0183993	0.00193819	0.000554204	0.00241664	0.0189263	0.000640339	0.464667	0.00127817	0.0287555	0.000114004	3.72178e-05	4.61112e-05	0.00373219	0.000194209	0.00206041	0.00414875	4.8556e-05	0.395487	0.000115005	5.24245e-06	5.70992e-05	0.00359032	0.00639492	1.37259e-06	2.95801e-06	6.53377e-06
H20	0.0012092	0.029359	0.00758222	0.000246939	0.00542311	0.00011026	0.0261891	3.25256e-05	0.467521	8.26246e-06	0.000294814	0.000210925	0.000115449	0.000244077	0.000535701	0.00016344	1.09774e-05	0.00342112	0.000115005	0.379271	0.000162255	1.82402e-05	2.2143e-06	2.83698e-06	1.48522e-05	5.21144e-06	1.15626e-05
H21	9.25093e-05	0.00361309	0.0290154	2.73376e-05	0.000362522	2.7635e-05	0.00363492	3.41513e-06	0.00551889	1.49675e-06	0.460861	0.0182333	0.00627328	3.94097e-05	0.000119325	2.93658e-05	5.04512e-06	9.15755e-05	5.24245e-06	0.000162255	0.39179	0.0145016	2.76046e-07	3.35718e-07	0.00510113	0.000456603	0.00422586
H22	2.16836e-05	0.00880573	0.026827	6.80511e-06	4.08954e-05	3.10046e-06	0.000399828	2.43073e-05	0.000545327	2.83299e-06	0.463178	0.0191776	0.00943143	6.27966e-05	1.58157e-05	7.9162e-06	3.40613e-07	1.69935e-05	5.70992e-05	1.82402e-05	0.0145016	0.394492	4.10002e-07	1.59163e-06	0.00131746	0.000777271	0.000495707
H23	0.00090724	0.000116359	2.28712e-05	0.000496118	6.56194e-05	0.00635752	3.23562e-05	0.0299516	3.02789e-05	0.483118	9.44895e-07	5.31712e-07	9.00712e-07	7.05652e-05	6.02995e-06	0.000805461	0.000467367	3.30396e-06	0.00359032	2.2143e-06	2.76046e-07	4.10002e-07	0.406683	0.0167203	3.7372e-08	2.18966e-07	5.9326e-07
H24	0.00148345	0.000331412	6.44295e-05	0.000450212	0.000141524	0.00614355	5.67955e-05	0.0300849	5.04412e-05	0.480966	2.01936e-06	8.7505e-07	8.3783e-07	0.000109351	1.3343e-05	0.000435842	0.00317958	3.36799e-06	0.00639492	2.83698e-06	3.35718e-07	1.59163e-06	0.0167203	0.410762	4.504e-08	1.29544e-07	5.66928e-07
H25	1.13196e-05	0.000592863	0.00700478	7.157e-06	9.02039e-05	2.19575e-06	9.88069e-05	6.64786e-07	0.000162846	3.32531e-07	0.0197508	0.472525	0.028829	6.45318e-05	0.000107983	8.71824e-07	6.72518e-07	4.21262e-06	1.37259e-06	1.48522e-05	0.00510113	0.00131746	3.7372e-08	4.504e-08	0.408854	0.00360036	0.00661795
H26	1.24613e-05	0.000321812	0.00154606	6.42201e-06	0.000135639	2.24403e-06	3.27864e-05	3.00528e-06	1.6526e-05	1.93612e-06	0.00625793	0.0300407	0.483481	0.000157843	0.000125314	3.80607e-07	9.46886e-07	1.70182e-06	2.95801e-06	5.21144e-06	0.000456603	0.000777271	2.18966e-07	1.29544e-07	0.00360036	0.409012	0.016732
H27	0.000614286	0.000777529	0.0012961	0.000280848	0.00522087	0.000108515	0.00063993	1.19477e-05	0.000286027	1.43328e-05	0.00632313	0.0300562	0.477123	0.00246626	0.00355663	9.87839e-06	3.73209e-05	2.91391e-05	6.53377e-06	1.15626e-05	0.00422586	0.000495707	5.9326e-07	5.66928e-07	0.00661795	0.016732	0.411225
LDM — ajoene_z_26_LIDI_matrix
	S1	S2	S3	O4	C5	C6	C7	C8	C9	C10	C11	C12	C13	H14	H15	H16	H17	H18	H19	H20	H21	H22	H23	H24	H25	H26	H27
S1	12.9267	0.00281806	0.000910866	0.686091	0.466561	0.466692	0.0274735	0.0279505	0.0111841	0.0152946	5.72743e-05	0.000348129	0.000780515	0.0221075	0.0224673	0.0197038	0.0233021	0.0064526	0.00258892	0.000809962	1.61944e-05	5.36093e-06	0.000690557	0.0013462	2.62338e-05	0.00016348	0.000120835		92.2553	31.7448
S2	0.00281806	14.5029	0.644815	0.00081622	0.0152428	0.000703729	0.055235	0.00684654	0.569945	0.0204161	0.0380824	0.0111243	0.00717378	0.00162222	0.0173618	0.000489345	0.000184882	0.00909327	0.000271407	0.0290462	0.00837801	0.00579041	0.00961538	0.00148469	0.000537115	0.00156552	0.000276153
S3	0.000910866	0.644815	14.6422	0.00032309	0.00166424	0.00014635	0.0154833	0.0012253	0.0435551	0.00190776	0.528531	0.0383482	0.0206685	0.00059247	0.00108858	0.000114233	4.3885e-05	0.00159786	4.48851e-05	0.00914287	0.0269382	0.0294196	0.000573862	0.000105376	0.00646233	0.00125397	0.00150243
O4	0.686091	0.00081622	0.00032309	8.37166	0.0631493	0.0615252	0.00951011	0.0133567	0.00450047	0.00292073	2.39409e-05	8.62495e-05	0.000176945	0.00513856	0.00530644	0.00846002	0.00392022	0.00105059	0.0125763	0.00060765	6.49608e-06	3.1015e-06	0.000525346	0.000319736	7.7681e-06	5.88275e-05	1.91887e-05
C5	0.466561	0.0152428	0.00166424	0.0631493	4.0735	0.0235557	0.518843	0.00841047	0.0336216	0.00351109	0.000234667	0.00206548	0.00601115	0.45718	0.450453	0.00190849	0.00511166	0.018973	0.000310546	0.00540141	7.36861e-05	2.37829e-05	0.0001367	0.000142825	8.5275e-05	0.000818944	0.00122042
C6	0.466692	0.000703729	0.00014635	0.0615252	0.0235557	4.07186	0.0072445	0.517401	0.00297903	0.0373986	1.67369e-05	6.197e-05	0.000130555	0.00471525	0.00273741	0.462172	0.464131	0.000476541	0.0187014	7.64316e-05	6.15751e-06	1.61623e-06	0.00608872	0.00635731	5.05423e-06	9.42527e-06	5.09633e-05
C7	0.0274735	0.055235	0.0154833	0.00951011	0.518843	0.0072445	3.9567	0.00121369	0.879632	0.000891312	0.00151189	0.00467567	0.00493836	0.0195291	0.0163307	0.00867584	0.000717734	0.469525	0.000131186	0.02629	0.000624485	0.000108625	0.000423578	4.42322e-05	0.000576854	0.000227899	0.000395308
C8	0.0279505	0.00684654	0.0012253	0.0133567	0.00841047	0.517401	0.00121369	3.98047	0.000846086	0.913036	5.11765e-05	8.92703e-06	1.47604e-05	0.000735853	0.0094676	0.0174522	0.0191852	0.00016493	0.465073	3.00124e-05	3.37471e-05	1.24041e-05	0.0296981	0.0298853	1.94306e-06	5.24428e-06	4.1873e-06
C9	0.0111841	0.569945	0.0435551	0.00450047	0.0336216	0.00297903	0.879632	0.000846086	4.08516	0.00171895	0.00222699	0.00771509	0.00443133	0.0106745	0.00353174	0.00479815	0.000183203	0.0301036	9.93629e-05	0.467259	0.000415129	0.000351555	0.00112272	0.000170287	0.00142802	0.000181395	0.000195104
C10	0.0152946	0.0204161	0.00190776	0.00292073	0.00351109	0.0373986	0.000891312	0.913036	0.00171895	4.07232	0.00011662	1.92813e-05	1.95518e-05	0.000264854	0.00559917	0.00588257	0.0105809	9.22208e-05	0.0275133	9.1704e-05	5.33665e-05	1.89475e-05	0.476932	0.482399	3.22055e-06	5.48211e-06	1.45828e-06
C11	5.72743e-05	0.0380824	0.528531	2.39409e-05	0.000234667	1.67369e-05	0.00151189	5.11765e-05	0.00222699	0.00011662	4.01089	0.516738	0.0366906	0.000185208	0.000162619	1.51765e-05	3.24246e-06	9.50994e-05	2.3296e-06	0.000352066	0.463029	0.463536	0.000154119	6.77225e-06	0.0197881	0.00632346	0.00627269
C12	0.000348129	0.0111243	0.0383482	8.62495e-05	0.00206548	6.197e-05	0.00467567	8.92703e-06	0.00771509	1.92813e-05	0.516738	3.9624	0.91151	0.00168283	0.000410865	2.6833e-05	2.26166e-05	0.000101537	1.2558e-06	0.000259736	0.0193514	0.0184139	1.98188e-05	1.1454e-06	0.472209	0.0297661	0.0301098
C13	0.000780515	0.00717378	0.0206685	0.000176945	0.00601115	0.000130555	0.00493836	1.47604e-05	0.00443133	1.95518e-05	0.0366906	0.91151	4.07245	0.00604288	0.00148414	3.43632e-05	4.91948e-05	0.000113176	1.14132e-06	8.31362e-05	0.00965326	0.00640405	1.0594e-05	1.00144e-06	0.0287201	0.479273	0.482247
H14	0.0221075	0.00162222	0.00059247	0.00513856	0.45718	0.00471525	0.0195291	0.000735853	0.0106745	0.000264854	0.000185208	0.00168283	0.00604288	0.382711	0.0134221	0.000214562	0.000952328	0.000997247	2.11066e-05	0.00053124	4.99698e-05	9.37951e-06	1.71078e-05	1.02116e-05	6.65656e-05	0.000555379	0.00239475
H15	0.0224673	0.0173618	0.00108858	0.00530644	0.450453	0.00273741	0.0163307	0.0094676	0.00353174	0.00559917	0.000162619	0.000410865	0.00148414	0.0134221	0.360223	9.89324e-05	0.000198284	0.00485347	0.000665433	0.00023913	2.61358e-05	3.42678e-05	0.000156263	0.000159668	2.81833e-05	0.000627689	7.60778e-05
H16	0.0197038	0.000489345	0.000114233	0.00846002	0.00190849	0.462172	0.00867584	0.0174522	0.00479815	0.00588257	1.51765e-05	2.6833e-05	3.43632e-05	0.000214562	9.89324e-05	0.391507	0.0145536	0.000541298	0.00483942	0.000105006	6.32607e-06	9.4991e-07	0.003599	0.000431199	3.90119e-06	2.35768e-06	2.48905e-06
H17	0.0233021	0.000184882	4.3885e-05	0.00392022	0.00511166	0.464131	0.000717734	0.0191852	0.000183203	0.0105809	3.24246e-06	2.26166e-05	4.91948e-05	0.000952328	0.000198284	0.0145536	0.392076	2.81278e-05	0.000859079	5.45668e-06	2.74221e-06	4.38261e-07	0.000451908	0.000745742	9.0195e-07	3.72029e-06	1.2071e-05
H18	0.0064526	0.00909327	0.00159786	0.00105059	0.018973	0.000476541	0.469525	0.00016493	0.0301036	9.22208e-05	9.50994e-05	0.000101537	0.000113176	0.000997247	0.00485347	0.000541298	2.81278e-05	0.402593	3.05739e-05	0.00371493	3.68107e-05	8.16167e-06	2.03327e-05	1.10448e-05	2.21438e-05	2.06194e-05	1.90985e-05
H19	0.00258892	0.000271407	4.48851e-05	0.0125763	0.000310546	0.0187014	0.000131186	0.465073	9.93629e-05	0.0275133	2.3296e-06	1.2558e-06	1.14132e-06	2.11066e-05	0.000665433	0.00483942	0.000859079	3.05739e-05	0.38148	2.4988e-06	1.2363e-06	5.1009e-07	0.00631532	0.00351582	1.68448e-07	3.44097e-07	2.27488e-07
H20	0.000809962	0.0290462	0.00914287	0.00060765	0.00540141	7.64316e-05	0.02629	3.00124e-05	0.467259	9.1704e-05	0.000352066	0.000259736	8.31362e-05	0.00053124	0.00023913	0.000105006	5.45668e-06	0.00371493	2.4988e-06	0.380721	1.85723e-05	0.000175229	2.22632e-05	1.92567e-05	0.000160241	2.51003e-05	8.16342e-06
H21	1.61944e-05	0.00837801	0.0269382	6.49608e-06	7.36861e-05	6.15751e-06	0.000624485	3.37471e-05	0.000415129	5.33665e-05	0.463029	0.0193514	0.00965326	4.99698e-05	2.61358e-05	6.32607e-06	2.74221e-06	3.68107e-05	1.2363e-06	1.85723e-05	0.39588	0.0145597	4.42814e-05	2.76513e-06	0.00133122	0.000497168	0.000790002
H22	5.36093e-06	0.00579041	0.0294196	3.1015e-06	2.37829e-05	1.61623e-06	0.000108625	1.24041e-05	0.000351555	1.89475e-05	0.463536	0.0184139	0.00640405	9.37951e-06	3.42678e-05	9.4991e-07	4.38261e-07	8.16167e-06	5.1009e-07	0.000175229	0.0145597	0.393979	6.79815e-06	1.67487e-06	0.0051959	0.00429434	0.000467401
H23	0.000690557	0.00961538	0.000573862	0.000525346	0.0001367	0.00608872	0.000423578	0.0296981	0.00112272	0.476932	0.000154119	1.98188e-05	1.0594e-05	1.71078e-05	0.000156263	0.003599	0.000451908	2.03327e-05	0.00631532	2.22632e-05	4.42814e-05	6.79815e-06	0.407006	0.0166712	1.12358e-06	1.7772e-06	4.50359e-07
H24	0.0013462	0.00148469	0.000105376	0.000319736	0.000142825	0.00635731	4.42322e-05	0.0298853	0.000170287	0.482399	6.77225e-06	1.1454e-06	1.00144e-06	1.02116e-05	0.000159668	0.000431199	0.000745742	1.10448e-05	0.00351582	1.92567e-05	2.76513e-06	1.67487e-06	0.0166712	0.407393	3.43917e-07	3.48859e-07	8.43237e-08
H25	2.62338e-05	0.000537115	0.00646233	7.7681e-06	8.5275e-05	5.05423e-06	0.000576854	1.94306e-06	0.00142802	3.22055e-06	0.0197881	0.472209	0.0287201	6.65656e-05	2.81833e-05	3.90119e-06	9.0195e-07	2.21438e-05	1.68448e-07	0.000160241	0.00133122	0.0051959	1.12358e-06	3.43917e-07	0.410905	0.00670982	0.00363303
H26	0.00016348	0.00156552	0.00125397	5.88275e-05	0.000818944	9.42527e-06	0.000227899	5.24428e-06	0.000181395	5.48211e-06	0.00632346	0.0297661	0.479273	0.000555379	0.000627689	2.35768e-06	3.72029e-06	2.06194e-05	3.44097e-07	2.51003e-05	0.000497168	0.00429434	1.7772e-06	3.48859e-07	0.00670982	0.408295	0.0167899
H27	0.000120835	0.000276153	0.00150243	1.91887e-05	0.00122042	5.09633e-05	0.000395308	4.1873e-06	0.000195104	1.45828e-06	0.00627269	0.0301098	0.482247	0.00239475	7.60778e-05	2.48905e-06	1.2071e-05	1.90985e-05	2.27488e-07	8.16342e-06	0.000790002	0.000467401	4.50359e-07	8.43237e-08	0.00363303	0.0167899	0.411267
LDM — ajoene_z_27_LIDI_matrix
	S1	S2	S3	O4	C5	C6	C7	C8	C9	C10	C11	C12	C13	H14	H15	H16	H17	H18	H19	H20	H21	H22	H23	H24	H25	H26	H27
S1	12.9048	0.00241964	0.000871677	0.684575	0.465255	0.462862	0.0311333	0.0272039	0.0133725	0.0148828	0.000440123	0.00069979	0.00687215	0.0175134	0.025	0.0237527	0.0221007	0.00291963	0.00294311	0.000647953	0.00106635	4.52453e-05	0.000880588	0.000879105	0.000347889	0.000483072	0.0177474		92.2655	31.7343
S2	0.00241964	14.5269	0.643546	0.00123288	0.0176162	0.000311178	0.0574112	0.000174779	0.574454	0.000463594	0.0376886	0.0153615	0.011434	0.0210658	0.00144466	4.58207e-05	5.47879e-05	0.00882737	9.82664e-06	0.0291031	0.00378417	0.00884602	3.91647e-05	2.31303e-05	0.000540459	0.000322242	0.000949413
S3	0.000871677	0.643546	14.6384	0.000255281	0.00196051	0.000113461	0.0177045	9.13812e-05	0.0447884	0.000133887	0.528204	0.0402749	0.0221177	0.00144213	0.000537881	1.73564e-05	2.5212e-05	0.00147097	1.79461e-05	0.008945	0.0288318	0.0269019	1.01039e-05	1.62563e-05	0.00679993	0.00153096	0.00126358
O4	0.684575	0.00123288	0.000255281	8.37387	0.0623065	0.0625551	0.0108291	0.00924471	0.0022388	0.00549487	7.49153e-05	0.000101982	0.00104026	0.00759732	0.00609197	0.00505089	0.00599178	0.00943677	0.000536434	0.000132548	0.000173444	8.7247e-06	0.00032409	0.0005736	6.36205e-05	8.20611e-05	0.00230378
C5	0.465255	0.0176162	0.00196051	0.0623065	4.07809	0.0247811	0.517989	0.00632485	0.0348049	0.00505525	0.000221988	0.000375573	0.00160508	0.450021	0.459085	0.00598241	0.00425722	0.0179087	0.000288645	0.00550045	0.000216029	3.23929e-05	0.000955613	0.000139013	3.66961e-05	5.53018e-05	0.00219015
C6	0.462862	0.000311178	0.000113461	0.0625551	0.0247811	4.06917	0.00485821	0.520231	0.00196682	0.0370721	2.38182e-05	3.01227e-05	0.000343281	0.00179902	0.00564031	0.461682	0.463124	0.000211095	0.0196154	0.000200885	7.33536e-05	4.44048e-06	0.00611443	0.00630919	1.05948e-05	0.000197015	0.000834177
C7	0.0311333	0.0574112	0.0177045	0.0108291	0.517989	0.00485821	3.9679	0.000777396	0.883579	0.000457272	0.00219199	0.000298208	0.000387371	0.0162771	0.0195643	0.000516987	0.00100047	0.463846	2.48408e-05	0.0261625	0.00318518	0.000372953	0.000129549	1.01701e-05	8.05733e-05	2.27214e-05	0.000414082
C8	0.0272039	0.000174779	9.13812e-05	0.00924471	0.00632485	0.520231	0.000777396	3.97614	0.000127248	0.913861	5.46603e-05	0.000877277	0.00546573	0.00745184	0.000449362	0.0177786	0.0187172	0.000175757	0.47095	1.49488e-05	1.01958e-05	1.51776e-05	0.0300511	0.0297948	5.84985e-05	0.00247725	0.00356473
C9	0.0133725	0.574454	0.0447884	0.0022388	0.0348049	0.00196682	0.883579	0.000127248	4.09552	0.000192296	0.00494828	0.000723636	0.000421789	0.00376245	0.0100089	0.000278802	0.000462269	0.0281492	1.09125e-05	0.466973	0.00575479	0.00054747	3.4263e-05	7.86774e-06	0.00016791	2.22741e-05	0.000300766
C10	0.0148828	0.000463594	0.000133887	0.00549487	0.00505525	0.0370721	0.000457272	0.913861	0.000192296	4.07353	5.21274e-05	0.000696429	0.00326847	0.00768175	0.000652305	0.006008	0.00914882	0.000184713	0.0291191	2.40563e-05	5.23564e-06	1.18108e-05	0.479928	0.482291	4.217e-05	0.00166457	0.00129124
C11	0.000440123	0.0376886	0.528204	7.49153e-05	0.000221988	2.38182e-05	0.00219199	5.46603e-05	0.00494828	5.21274e-05	4.01378	0.517188	0.0368176	0.000224735	4.73329e-05	4.84851e-06	3.17252e-06	0.000107817	5.93534e-05	0.000312713	0.460329	0.463523	1.44754e-06	2.17321e-05	0.0198244	0.00623516	0.00616304
C12	0.00069979	0.0153615	0.0402749	0.000101982	0.000375573	3.01227e-05	0.000298208	0.000877277	0.000723636	0.000696429	0.517188	3.96425	0.914953	0.0011354	5.77273e-05	9.22578e-06	6.11327e-06	1.85333e-05	0.000491584	0.000205216	0.0181537	0.0191747	1.46735e-05	8.1942e-05	0.472979	0.0299741	0.0288426
C13	0.00687215	0.011434	0.0221177	0.00104026	0.00160508	0.000343281	0.000387371	0.00546573	0.000421789	0.00326847	0.0368176	0.914953	4.07805	0.00337877	0.000123858	9.54412e-05	3.60805e-05	4.38295e-05	0.00356429	0.000116733	0.00616129	0.00926415	9.98148e-05	0.000497581	0.0288949	0.481626	0.468552
H14	0.0175134	0.0210658	0.00144213	0.00759732	0.450021	0.00179902	0.0162771	0.00745184	0.00376245	0.00768175	0.000224735	0.0011354	0.00337877	0.358229	0.013598	0.00020744	0.000178163	0.00446156	0.000161048	0.000285991	3.72133e-05	4.98745e-05	0.000882884	0.000182407	4.90284e-05	0.000106356	0.00195415
H15	0.025	0.00144466	0.000537881	0.00609197	0.459085	0.00564031	0.0195643	0.000449362	0.0100089	0.000652305	4.73329e-05	5.77273e-05	0.000123858	0.013598	0.387777	0.00513127	0.000340075	0.000922508	0.00013212	0.00068149	8.4698e-05	9.67084e-06	0.000570185	4.91232e-05	3.53284e-06	2.86097e-06	0.000273943
H16	0.0237527	4.58207e-05	1.73564e-05	0.00505089	0.00598241	0.461682	0.000516987	0.0177786	0.000278802	0.006008	4.84851e-06	9.22578e-06	9.54412e-05	0.00020744	0.00513127	0.392644	0.0144793	1.49732e-05	0.00486666	2.85019e-05	2.10279e-05	5.61193e-07	0.00363075	0.00041936	2.89235e-06	5.70147e-05	0.000183616
H17	0.0221007	5.47879e-05	2.5212e-05	0.00599178	0.00425722	0.463124	0.00100047	0.0187172	0.000462269	0.00914882	3.17252e-06	6.11327e-06	3.60805e-05	0.000178163	0.000340075	0.0144793	0.386517	2.19531e-05	0.0016465	5.37644e-05	2.62755e-06	5.91491e-07	0.000498683	0.000792144	1.12713e-06	1.09527e-05	3.36492e-05
H18	0.00291963	0.00882737	0.00147097	0.00943677	0.0179087	0.000211095	0.463846	0.000175757	0.0281492	0.000184713	0.000107817	1.85333e-05	4.38295e-05	0.00446156	0.000922508	1.49732e-05	2.19531e-05	0.377629	3.99891e-06	0.0034246	8.8274e-05	1.72023e-05	1.70128e-05	5.77261e-06	4.22422e-06	8.29663e-07	2.31793e-05
H19	0.00294311	9.82664e-06	1.79461e-05	0.000536434	0.000288645	0.0196154	2.48408e-05	0.47095	1.09125e-05	0.0291191	5.93534e-05	0.000491584	0.00356429	0.000161048	0.00013212	0.00486666	0.0016465	3.99891e-06	0.406422	8.22186e-07	6.39463e-06	9.24851e-06	0.00672853	0.00366585	4.06707e-05	0.00223361	0.00212063
H20	0.000647953	0.0291031	0.008945	0.000132548	0.00550045	0.000200885	0.0261625	1.49488e-05	0.466973	2.40563e-05	0.000312713	0.000205216	0.000116733	0.000285991	0.00068149	2.85019e-05	5.37644e-05	0.0034246	8.22186e-07	0.378326	0.000201049	1.83564e-05	4.96226e-06	9.88182e-07	1.61128e-05	5.62801e-06	9.5111e-06
H21	0.00106635	0.00378417	0.0288318	0.000173444	0.000216029	7.33536e-05	0.00318518	1.01958e-05	0.00575479	5.23564e-06	0.460329	0.0181537	0.00616129	3.72133e-05	8.4698e-05	2.10279e-05	2.62755e-06	8.8274e-05	6.39463e-06	0.000201049	0.388992	0.014451	9.1696e-07	9.63718e-07	0.00504554	0.000444231	0.00408933
H22	4.52453e-05	0.00884602	0.0269019	8.7247e-06	3.23929e-05	4.44048e-06	0.000372953	1.51776e-05	0.00054747	1.18108e-05	0.463523	0.0191747	0.00926415	4.98745e-05	9.67084e-06	5.61193e-07	5.91491e-07	1.72023e-05	9.24851e-06	1.83564e-05	0.014451	0.39559	2.40412e-07	1.03689e-06	0.00137181	0.000788789	0.000484963
H23	0.000880588	3.91647e-05	1.01039e-05	0.00032409	0.000955613	0.00611443	0.000129549	0.0300511	3.4263e-05	0.479928	1.44754e-06	1.46735e-05	9.98148e-05	0.000882884	0.000570185	0.00363075	0.000498683	1.70128e-05	0.00672853	4.96226e-06	9.1696e-07	2.40412e-07	0.410024	0.0165521	1.85259e-06	8.6714e-05	7.28295e-05
H24	0.000879105	2.31303e-05	1.62563e-05	0.0005736	0.000139013	0.00630919	1.01701e-05	0.0297948	7.86774e-06	0.482291	2.17321e-05	8.1942e-05	0.000497581	0.000182407	4.91232e-05	0.00041936	0.000792144	5.77261e-06	0.00366585	9.88182e-07	9.63718e-07	1.03689e-06	0.0165521	0.405016	8.23105e-06	0.000657689	7.2002e-05
H25	0.000347889	0.000540459	0.00679993	6.36205e-05	3.66961e-05	1.05948e-05	8.05733e-05	5.84985e-05	0.00016791	4.217e-05	0.0198244	0.472979	0.0288949	4.90284e-05	3.53284e-06	2.89235e-06	1.12713e-06	4.22422e-06	4.06707e-05	1.61128e-05	0.00504554	0.00137181	1.85259e-06	8.23105e-06	0.41082	0.00362719	0.00627062
H26	0.000483072	0.000322242	0.00153096	8.20611e-05	5.53018e-05	0.000197015	2.27214e-05	0.00247725	2.22741e-05	0.00166457	0.00623516	0.0299741	0.481626	0.000106356	2.86097e-06	5.70147e-05	1.09527e-05	8.29663e-07	0.00223361	5.62801e-06	0.000444231	0.000788789	8.6714e-05	0.000657689	0.00362719	0.412073	0.0163472
H27	0.0177474	0.000949413	0.00126358	0.00230378	0.00219015	0.000834177	0.000414082	0.00356473	0.000300766	0.00129124	0.00616304	0.0288426	0.468552	0.00195415	0.000273943	0.000183616	3.36492e-05	2.31793e-05	0.00212063	9.5111e-06	0.00408933	0.000484963	7.28295e-05	7.2002e-05	0.00627062	0.0163472	0.395027
LDM — ajoene_z_28_LIDI_matrix
	S1	S2	S3	O4	C5	C6	C7	C8	C9	C10	C11	C12	C13	H14	H15	H16	H17	H18	H19	H20	H21	H22	H23	H24	H25	H26	H27
S1	12.9264	0.00325141	0.000466393	0.687517	0.460029	0.463431	0.0278841	0.0304237	0.0166537	0.018054	0.000214241	0.000252223	0.000645576	0.0219388	0.0193056	0.0236779	0.019466	0.00184485	0.00252713	0.000920442	1.89327e-05	0.000417541	0.000928075	0.00098778	2.49182e-05	2.39963e-05	0.000916055		92.2563	31.7432
S2	0.00325141	14.5207	0.650331	0.00127385	0.0155166	0.00453784	0.0627427	0.000477531	0.575223	0.000194549	0.0380185	0.0127844	0.00618229	0.00155495	0.0174098	0.0026423	0.00591822	0.00902367	3.57902e-05	0.0277506	0.00901727	0.00394867	1.99908e-05	2.47289e-05	0.000694937	0.000233588	0.000256284
S3	0.000466393	0.650331	14.6247	0.000270307	0.00195524	0.000270094	0.0113596	3.85105e-05	0.0425153	3.72284e-05	0.530677	0.0389452	0.0180851	0.000282367	0.00178335	0.00031734	0.000431152	0.00138027	6.85266e-06	0.013959	0.0276015	0.0287637	3.1466e-05	2.3418e-06	0.00912494	0.00156012	0.00114206
O4	0.687517	0.00127385	0.000270307	8.35977	0.062123	0.0625786	0.0148759	0.0112311	0.00319915	0.00961836	4.84446e-05	0.000178008	0.000421132	0.00343045	0.00807876	0.00599883	0.00795222	0.00982635	0.000448547	0.000214912	8.22147e-06	9.43337e-05	0.00197743	0.000380625	1.38153e-05	1.43966e-05	0.000450375
C5	0.460029	0.0155166	0.00195524	0.062123	4.06758	0.0248623	0.518295	0.00497938	0.034735	0.00244012	0.000134928	4.11254e-05	3.20541e-05	0.464956	0.461148	0.00309969	0.00403715	0.0177816	0.000238953	0.00548578	3.52846e-05	6.8203e-05	0.000161399	0.000220253	2.93809e-06	2.29065e-06	3.41816e-05
C6	0.463431	0.00453784	0.000270094	0.0625786	0.0248623	4.06828	0.00825108	0.517859	0.00510295	0.0370526	0.00046054	0.0013895	0.00606736	0.00469037	0.00398197	0.45071	0.459582	0.000193526	0.0199792	0.000132	6.61165e-05	0.00138356	0.00623945	0.00632536	0.000115306	0.000224686	0.00639987
C7	0.0278841	0.0627427	0.0113596	0.0148759	0.518295	0.00825108	3.95432	0.000903566	0.878455	0.000151931	0.00183174	0.000326983	0.00012711	0.019575	0.0171935	0.011023	0.000496088	0.463351	0.00024741	0.0252237	0.000355168	0.000660153	5.11489e-05	1.41585e-05	3.81619e-05	4.38206e-06	2.13043e-05
C8	0.0304237	0.000477531	3.85105e-05	0.0112311	0.00497938	0.517859	0.000903566	3.97259	0.000509159	0.913025	8.83936e-05	0.000485534	0.0041656	0.00100081	0.000385189	0.0173098	0.0179127	2.52335e-05	0.475054	1.18806e-05	8.57806e-06	0.000180447	0.0294999	0.0299484	0.000163884	0.00022619	0.00982771
C9	0.0166537	0.575223	0.0425153	0.00319915	0.034735	0.00510295	0.878455	0.000509159	4.1066	0.000433065	0.00294464	0.000615916	0.000178759	0.00871891	0.00369337	0.00927636	0.000384875	0.0283904	0.000196474	0.464704	0.000379411	0.00236037	4.88911e-05	2.20446e-05	0.000145896	8.93718e-06	2.93441e-05
C10	0.018054	0.000194549	3.72284e-05	0.00961836	0.00244012	0.0370526	0.000151931	0.913025	0.000433065	4.07026	6.85609e-05	0.000224248	0.00189082	0.000620639	0.000189549	0.00652969	0.00770132	1.14337e-05	0.0297506	1.64564e-05	6.03474e-06	0.000159476	0.478899	0.483324	0.000112449	0.000119458	0.00573376
C11	0.000214241	0.0380185	0.530677	4.84446e-05	0.000134928	0.00046054	0.00183174	8.83936e-05	0.00294464	6.85609e-05	4.01549	0.515513	0.0371069	3.60413e-05	9.22067e-05	0.00144563	0.000213136	0.000105637	1.17376e-05	0.000391705	0.46148	0.46229	5.1172e-05	1.92645e-06	0.0197363	0.00633375	0.00591524
C12	0.000252223	0.0127844	0.0389452	0.000178008	4.11254e-05	0.0013895	0.000326983	0.000485534	0.000615916	0.000224248	0.515513	3.97165	0.918908	9.62085e-06	3.86495e-05	0.000300688	0.00258709	2.05624e-05	3.03521e-05	0.000198232	0.019426	0.0182083	1.58492e-05	5.96365e-06	0.471787	0.0304529	0.0288901
C13	0.000645576	0.00618229	0.0180851	0.000421132	3.20541e-05	0.00606736	0.00012711	0.0041656	0.000178759	0.00189082	0.0371069	0.918908	4.08406	5.07677e-06	3.71673e-05	0.00105278	0.00679888	5.48971e-06	0.000161245	7.85356e-05	0.0107701	0.00621058	5.45603e-05	4.37722e-05	0.0287633	0.483527	0.470092
H14	0.0219388	0.00155495	0.000282367	0.00343045	0.464956	0.00469037	0.019575	0.00100081	0.00871891	0.000620639	3.60413e-05	9.62085e-06	5.07677e-06	0.390615	0.0147171	0.000193097	0.0003479	0.00138488	2.18789e-05	0.000711818	1.03001e-05	1.57527e-05	2.94566e-05	6.56186e-05	5.59133e-07	2.60759e-07	9.64215e-06
H15	0.0193056	0.0174098	0.00178335	0.00807876	0.461148	0.00398197	0.0171935	0.000385189	0.00369337	0.000189549	9.22067e-05	3.86495e-05	3.71673e-05	0.0147171	0.390014	0.000187858	0.00354068	0.00472953	1.22553e-05	0.000237771	3.01632e-05	7.62995e-06	1.11926e-05	2.60833e-05	9.45841e-07	2.62322e-06	8.1838e-06
H16	0.0236779	0.0026423	0.00031734	0.00599883	0.00309969	0.45071	0.011023	0.0173098	0.00927636	0.00652969	0.00144563	0.000300688	0.00105278	0.000193097	0.000187858	0.373328	0.0139424	0.000335539	0.00441938	0.000196347	0.000109463	0.00262319	0.00365056	0.000448578	8.35311e-05	9.70451e-05	0.00166644
H17	0.019466	0.00591822	0.000431152	0.00795222	0.00403715	0.459582	0.000496088	0.0179127	0.000384875	0.00770132	0.000213136	0.00258709	0.00679888	0.0003479	0.00354068	0.0139424	0.38761	6.77242e-05	0.00197825	3.46165e-05	8.51071e-05	8.39583e-05	0.000469801	0.000797016	7.92974e-05	0.000240721	0.00253617
H18	0.00184485	0.00902367	0.00138027	0.00982635	0.0177816	0.000193526	0.463351	2.52335e-05	0.0283904	1.14337e-05	0.000105637	2.05624e-05	5.48971e-06	0.00138488	0.00472953	0.000335539	6.77242e-05	0.375055	5.75052e-06	0.00350968	2.05991e-05	3.58121e-05	4.38441e-06	7.45317e-07	5.03034e-06	2.47816e-07	1.18777e-06
H19	0.00252713	3.57902e-05	6.85266e-06	0.000448547	0.000238953	0.0199792	0.00024741	0.475054	0.000196474	0.0297506	1.17376e-05	3.03521e-05	0.000161245	2.18789e-05	1.22553e-05	0.00441938	0.00197825	5.75052e-06	0.414885	5.02803e-06	1.71727e-06	4.79142e-05	0.00673597	0.0036656	3.44309e-06	4.2313e-05	0.000334512
H20	0.000920442	0.0277506	0.013959	0.000214912	0.00548578	0.000132	0.0252237	1.18806e-05	0.464704	1.64564e-05	0.000391705	0.000198232	7.85356e-05	0.000711818	0.000237771	0.000196347	3.46165e-05	0.00350968	5.02803e-06	0.372394	3.43547e-05	0.000275411	1.62887e-06	8.02749e-07	3.33737e-05	6.78504e-06	4.57699e-06
H21	1.89327e-05	0.00901727	0.0276015	8.22147e-06	3.52846e-05	6.61165e-05	0.000355168	8.57806e-06	0.000379411	6.03474e-06	0.46148	0.019426	0.0107701	1.03001e-05	3.01632e-05	0.000109463	8.51071e-05	2.05991e-05	1.71727e-06	3.43547e-05	0.392411	0.0145177	3.77641e-06	1.63535e-07	0.000935959	0.000733129	0.000453795
H22	0.000417541	0.00394867	0.0287637	9.43337e-05	6.8203e-05	0.00138356	0.000660153	0.000180447	0.00236037	0.000159476	0.46229	0.0182083	0.00621058	1.57527e-05	7.62995e-06	0.00262319	8.39583e-05	3.58121e-05	4.79142e-05	0.000275411	0.0145177	0.394309	0.000128994	1.00537e-05	0.00505599	0.00044683	0.00376571
H23	0.000928075	1.99908e-05	3.1466e-05	0.00197743	0.000161399	0.00623945	5.11489e-05	0.0294999	4.88911e-05	0.478899	5.1172e-05	1.58492e-05	5.45603e-05	2.94566e-05	1.11926e-05	0.00365056	0.000469801	4.38441e-06	0.00673597	1.62887e-06	3.77641e-06	0.000128994	0.404579	0.0165369	1.01001e-05	6.51725e-06	0.000252663
H24	0.00098778	2.47289e-05	2.3418e-06	0.000380625	0.000220253	0.00632536	1.41585e-05	0.0299484	2.20446e-05	0.483324	1.92645e-06	5.96365e-06	4.37722e-05	6.56186e-05	2.60833e-05	0.000448578	0.000797016	7.45317e-07	0.0036656	8.02749e-07	1.63535e-07	1.00537e-05	0.0165369	0.409126	2.31808e-06	2.38371e-06	0.000137517
H25	2.49182e-05	0.000694937	0.00912494	1.38153e-05	2.93809e-06	0.000115306	3.81619e-05	0.000163884	0.000145896	0.000112449	0.0197363	0.471787	0.0287633	5.59133e-07	9.45841e-07	8.35311e-05	7.92974e-05	5.03034e-06	3.44309e-06	3.33737e-05	0.000935959	0.00505599	1.01001e-05	2.31808e-06	0.407558	0.00370433	0.00628525
H26	2.39963e-05	0.000233588	0.00156012	1.43966e-05	2.29065e-06	0.000224686	4.38206e-06	0.00022619	8.93718e-06	0.000119458	0.00633375	0.0304529	0.483527	2.60759e-07	2.62322e-06	9.70451e-05	0.000240721	2.47816e-07	4.2313e-05	6.78504e-06	0.000733129	0.00044683	6.51725e-06	2.38371e-06	0.00370433	0.410824	0.0162579
H27	0.000916055	0.000256284	0.00114206	0.000450375	3.41816e-05	0.00639987	2.13043e-05	0.00982771	2.93441e-05	0.00573376	0.00591524	0.0288901	0.470092	9.64215e-06	8.1838e-06	0.00166644	0.00253617	1.18777e-06	0.000334512	4.57699e-06	0.000453795	0.00376571	0.000252663	0.000137517	0.00628525	0.0162579	0.391174
LDM — ajoene_z_29_LIDI_matrix
	S1	S2	S3	O4	C5	C6	C7	C8	C9	C10	C11	C12	C13	H14	H15	H16	H17	H18	H19	H20	H21	H22	H23	H24	H25	H26	H27
S1	12.9132	0.00375425	0.00134401	0.685597	0.465452	0.462871	0.0318905	0.0275308	0.0165296	0.0168358	0.000113128	0.000179376	0.000490834	0.0241857	0.0181523	0.0199831	0.0226453	0.0015238	0.00203324	0.000862787	0.000215917	3.51942e-05	0.00130868	0.000742907	1.8383e-05	0.00086602	2.23571e-05		92.291	31.7107
S2	0.00375425	14.5389	0.640847	0.0012214	0.0189053	0.000391401	0.0535189	8.54279e-05	0.572298	0.000125911	0.0380009	0.0148762	0.0078767	0.00175119	0.0235114	0.000181277	7.75882e-05	0.00886412	1.39225e-05	0.0294936	0.00355254	0.00899351	6.14311e-06	1.34482e-05	0.000687552	0.000366357	0.000266268
S3	0.00134401	0.640847	14.6372	0.000373237	0.00198269	0.000147454	0.0203993	2.28211e-05	0.045711	7.07999e-05	0.531652	0.0392102	0.0194168	0.000479109	0.00132454	4.32703e-05	4.96915e-05	0.00158135	3.26246e-06	0.00628922	0.0288273	0.0269523	3.23553e-06	4.3407e-05	0.00810313	0.00122146	0.00153656
O4	0.685597	0.0012214	0.000373237	8.37147	0.0632013	0.0621008	0.00888717	0.012371	0.00297484	0.00321092	4.27059e-05	0.000128385	0.000274283	0.00653133	0.0075524	0.00845538	0.00394919	0.00436578	0.00991109	0.000154664	8.34234e-05	1.17758e-05	0.000299864	0.000463824	9.11242e-06	0.000296611	1.21389e-05
C5	0.465452	0.0189053	0.00198269	0.0632013	4.08073	0.024876	0.51964	0.00974811	0.0345712	0.00532389	0.000596823	0.00133679	0.00481395	0.452797	0.447505	0.0034274	0.0047076	0.0181877	0.000289096	0.00541061	0.000916842	7.59785e-05	0.000170272	0.000285177	0.000114175	0.00505271	0.000154496
C6	0.462871	0.000391401	0.000147454	0.0621008	0.024876	4.0698	0.00505497	0.518411	0.002002	0.0371388	1.30772e-05	1.99872e-05	0.000152084	0.00296896	0.00402624	0.465666	0.464313	0.000207009	0.0187232	0.000229737	1.49161e-05	3.5347e-06	0.00634945	0.0062333	1.85291e-06	0.000101718	4.52024e-05
C7	0.0318905	0.0535189	0.0203993	0.00888717	0.51964	0.00505497	3.9606	0.00109368	0.880177	0.000538754	0.00257478	0.000324637	0.000475938	0.0188159	0.0166712	0.000329868	0.00102258	0.467568	2.72495e-05	0.0263279	0.00445524	0.000434214	1.8616e-05	3.11509e-05	0.000106396	0.000419978	1.90781e-05
C8	0.0275308	8.54279e-05	2.28211e-05	0.012371	0.00974811	0.518411	0.00109368	3.97395	0.00037129	0.914196	5.59547e-06	5.65073e-05	0.000438119	0.0119594	0.000747802	0.0178535	0.0192343	3.5497e-05	0.466573	5.14546e-05	5.14459e-06	1.7487e-06	0.0299988	0.0303175	1.52992e-05	0.00125743	0.000125115
C9	0.0165296	0.572298	0.045711	0.00297484	0.0345712	0.002002	0.880177	0.00037129	4.09481	0.000730077	0.00480542	0.000688633	0.00027115	0.00772876	0.00433762	7.4422e-05	0.000560941	0.0284996	1.9064e-05	0.468492	0.00545934	0.000563776	2.73172e-05	2.49179e-05	0.00016363	0.000120448	1.06649e-05
C10	0.0168358	0.000125911	7.07999e-05	0.00321092	0.00532389	0.0371388	0.000538754	0.914196	0.000730077	4.08247	2.37918e-05	0.000278326	0.00218479	0.00856067	0.000660395	0.00591872	0.00997121	2.15505e-05	0.0278161	3.68726e-05	1.12816e-05	5.3223e-06	0.483279	0.479547	6.41956e-05	0.00332393	0.000861986
C11	0.000113128	0.0380009	0.531652	4.27059e-05	0.000596823	1.30772e-05	0.00257478	5.59547e-06	0.00480542	2.37918e-05	4.0154	0.516086	0.0367433	0.000122581	0.000569935	1.09551e-05	3.34063e-06	0.000103973	7.70595e-07	0.000289467	0.460366	0.4623	1.14587e-06	5.49442e-05	0.0195831	0.00610662	0.00627036
C12	0.000179376	0.0148762	0.0392102	0.000128385	0.00133679	1.99872e-05	0.000324637	5.65073e-05	0.000688633	0.000278326	0.516086	3.96382	0.915811	0.00014222	0.00360714	0.000107847	3.16858e-06	4.6692e-05	6.09193e-06	0.000208554	0.0182925	0.0195019	9.14591e-06	0.000534262	0.471788	0.0294515	0.0302123
C13	0.000490834	0.0078767	0.0194168	0.000274283	0.00481395	0.000152084	0.000475938	0.000438119	0.00027115	0.00218479	0.0367433	0.915811	4.08281	0.00114061	0.00933356	0.000322512	1.66792e-05	0.00010642	5.92025e-05	9.37623e-05	0.00620124	0.0101869	7.74887e-05	0.0029771	0.0287664	0.47439	0.482965
H14	0.0241857	0.00175119	0.000479109	0.00653133	0.452797	0.00296896	0.0188159	0.0119594	0.00772876	0.00856067	0.000122581	0.00014222	0.00114061	0.372007	0.0128844	0.00016632	0.000192352	0.0016838	0.000636059	0.000499407	0.000167544	1.57249e-05	0.000230282	0.000266989	7.62767e-05	0.0024805	0.000101407
H15	0.0181523	0.0235114	0.00132454	0.0075524	0.447505	0.00402624	0.0166712	0.000747802	0.00433762	0.000660395	0.000569935	0.00360714	0.00933356	0.0128844	0.362049	0.00311033	0.000333045	0.00442037	8.20257e-05	0.000325867	0.000270933	0.000120392	2.5823e-05	0.000220215	0.000115407	0.00410947	0.000273299
H16	0.0199831	0.000181277	4.32703e-05	0.00845538	0.0034274	0.465666	0.000329868	0.0178535	7.4422e-05	0.00591872	1.09551e-05	0.000107847	0.000322512	0.00016632	0.00311033	0.400119	0.014783	9.77862e-05	0.00502062	1.0156e-05	1.25381e-06	3.869e-06	0.000439849	0.00382665	2.90992e-06	4.19041e-05	8.5044e-05
H17	0.0226453	7.75882e-05	4.96915e-05	0.00394919	0.0047076	0.464313	0.00102258	0.0192343	0.000560941	0.00997121	3.34063e-06	3.16858e-06	1.66792e-05	0.000192352	0.000333045	0.014783	0.390885	2.43867e-05	0.00110485	5.96696e-05	3.41934e-06	1.26365e-06	0.000779929	0.000476488	4.63281e-07	3.23725e-05	3.14031e-06
H18	0.0015238	0.00886412	0.00158135	0.00436578	0.0181877	0.000207009	0.467568	3.5497e-05	0.0284996	2.15505e-05	0.000103973	4.6692e-05	0.00010642	0.0016838	0.00442037	9.77862e-05	2.43867e-05	0.386644	2.87532e-06	0.00336681	0.000106613	1.84411e-05	8.38645e-07	5.66016e-06	5.7463e-06	3.68238e-05	1.47164e-06
H19	0.00203324	1.39225e-05	3.26246e-06	0.00991109	0.000289096	0.0187232	2.72495e-05	0.466573	1.9064e-05	0.0278161	7.70595e-07	6.09193e-06	5.92025e-05	0.000636059	8.20257e-05	0.00502062	0.00110485	2.87532e-06	0.384563	1.64314e-06	2.32548e-07	1.46567e-07	0.00352878	0.00642998	6.29896e-07	4.81594e-05	6.16146e-05
H20	0.000862787	0.0294936	0.00628922	0.000154664	0.00541061	0.000229737	0.0263279	5.14546e-05	0.468492	3.68726e-05	0.000289467	0.000208554	9.37623e-05	0.000499407	0.000325867	1.0156e-05	5.96696e-05	0.00336681	1.64314e-06	0.380594	0.000133076	2.12825e-05	1.02932e-06	1.38989e-06	1.57019e-05	8.82639e-06	4.84942e-06
H21	0.000215917	0.00355254	0.0288273	8.34234e-05	0.000916842	1.49161e-05	0.00445524	5.14459e-06	0.00545934	1.12816e-05	0.460366	0.0182925	0.00620124	0.000167544	0.000270933	1.25381e-06	3.41934e-06	0.000106613	2.32548e-07	0.000133076	0.391235	0.014444	5.35092e-07	3.22534e-06	0.00509503	0.00402933	0.000458082
H22	3.51942e-05	0.00899351	0.0269523	1.17758e-05	7.59785e-05	3.5347e-06	0.000434214	1.7487e-06	0.000563776	5.3223e-06	0.4623	0.0195019	0.0101869	1.57249e-05	0.000120392	3.869e-06	1.26365e-06	1.84411e-05	1.46567e-07	2.12825e-05	0.014444	0.393069	2.92872e-07	6.22431e-06	0.00108414	0.000478217	0.000753251
H23	0.00130868	6.14311e-06	3.23553e-06	0.000299864	0.000170272	0.00634945	1.8616e-05	0.0299988	2.73172e-05	0.483279	1.14587e-06	9.14591e-06	7.74887e-05	0.000230282	2.5823e-05	0.000439849	0.000779929	8.38645e-07	0.00352878	1.02932e-06	5.35092e-07	2.92872e-07	0.408112	0.0168799	1.47836e-06	0.000114563	6.91583e-05
H24	0.000742907	1.34482e-05	4.3407e-05	0.000463824	0.000285177	0.0062333	3.11509e-05	0.0303175	2.49179e-05	0.479547	5.49442e-05	0.000534262	0.0029771	0.000266989	0.000220215	0.00382665	0.000476488	5.66016e-06	0.00642998	1.38989e-06	3.22534e-06	6.22431e-06	0.0168799	0.413792	3.07437e-05	0.00150859	0.00175013
H25	1.8383e-05	0.000687552	0.00810313	9.11242e-06	0.000114175	1.85291e-06	0.000106396	1.52992e-05	0.00016363	6.41956e-05	0.0195831	0.471788	0.0287664	7.62767e-05	0.000115407	2.90992e-06	4.63281e-07	5.7463e-06	6.29896e-07	1.57019e-05	0.00509503	0.00108414	1.47836e-06	3.07437e-05	0.407025	0.00651856	0.00366593
H26	0.00086602	0.000366357	0.00122146	0.000296611	0.00505271	0.000101718	0.000419978	0.00125743	0.000120448	0.00332393	0.00610662	0.0294515	0.47439	0.0024805	0.00410947	4.19041e-05	3.23725e-05	3.68238e-05	4.81594e-05	8.82639e-06	0.00402933	0.000478217	0.000114563	0.00150859	0.00651856	0.404042	0.0167192
H27	2.23571e-05	0.000266268	0.00153656	1.21389e-05	0.000154496	4.52024e-05	1.90781e-05	0.000125115	1.06649e-05	0.000861986	0.00627036	0.0302123	0.482965	0.000101407	0.000273299	8.5044e-05	3.14031e-06	1.47164e-06	6.16146e-05	4.84942e-06	0.000458082	0.000753251	6.91583e-05	0.00175013	0.00366593	0.0167192	0.411696
LDM — ajoene_z_30_LIDI_matrix
	S1	S2	S3	O4	C5	C6	C7	C8	C9	C10	C11	C12	C13	H14	H15	H16	H17	H18	H19	H20	H21	H22	H23	H24	H25	H26	H27
S1	12.8968	0.00242379	0.000914118	0.684079	0.46388	0.462273	0.0304983	0.0282176	0.0134392	0.0179198	0.000519533	0.000699695	0.00706999	0.0244531	0.0176694	0.0246527	0.0219907	0.00283682	0.00132185	0.000657381	5.16224e-05	0.00130033	0.000854108	0.00107532	0.000352615	0.00056945	0.0181578		92.2634	31.737
S2	0.00242379	14.5308	0.643029	0.00129686	0.0178127	0.000296459	0.0569294	0.000137571	0.574061	4.76489e-05	0.0377018	0.0149827	0.0109025	0.00145114	0.0220185	3.50977e-05	5.79447e-05	0.00873198	0.000148221	0.0291119	0.00888155	0.00389989	5.5752e-06	3.45139e-06	0.00053243	0.000313674	0.000855608
S3	0.000914118	0.643029	14.6383	0.000294886	0.00197748	0.000102425	0.018053	7.45753e-05	0.0450064	6.50452e-05	0.528463	0.0402206	0.0218107	0.000563624	0.00148637	1.59497e-05	2.26878e-05	0.00145757	2.78708e-05	0.00862832	0.0270351	0.0287934	1.53315e-05	1.79922e-06	0.00694891	0.00153088	0.00124473
O4	0.684079	0.00129686	0.000294886	8.36999	0.062141	0.0627547	0.0126952	0.0099621	0.00246789	0.00606832	7.8375e-05	9.96532e-05	0.00105275	0.0051147	0.00756542	0.00722896	0.00422578	0.011153	0.000550444	0.000141526	9.5581e-06	0.000189253	0.00051585	0.00036859	6.13789e-05	0.000113612	0.00230954
C5	0.46388	0.0178127	0.00197748	0.062141	4.07769	0.0244338	0.517679	0.00759842	0.0349286	0.00191503	0.000240438	0.00040789	0.00168687	0.460145	0.451415	0.00432803	0.00475421	0.0178015	0.0044643	0.00550968	3.47731e-05	0.000252756	7.25826e-05	0.000174028	3.79073e-05	6.06965e-05	0.0022011
C6	0.462273	0.000296459	0.000102425	0.0627547	0.0244338	4.06973	0.00463319	0.52016	0.00184331	0.0375327	2.50452e-05	2.88633e-05	0.000331992	0.00599281	0.00128979	0.462198	0.464206	0.000205408	0.019469	0.000199573	4.31666e-06	8.93017e-05	0.0063153	0.00618156	1.25176e-05	0.00012165	0.000882748
C7	0.0304983	0.0569294	0.018053	0.0126952	0.517679	0.00463319	3.96807	0.00082031	0.883601	0.000139432	0.00220214	0.000292831	0.000368567	0.0195898	0.0164821	0.000360453	0.000972509	0.46248	0.000492377	0.0261794	0.000378822	0.00329818	6.97852e-06	2.35224e-05	8.2587e-05	1.91611e-05	0.000346788
C8	0.0282176	0.000137571	7.45753e-05	0.0099621	0.00759842	0.52016	0.00082031	3.97716	0.000126859	0.913278	4.02857e-05	0.000624529	0.0037893	0.00103279	0.00683674	0.0181408	0.0181343	0.000165224	0.471396	1.88898e-05	1.12014e-05	1.06687e-05	0.029777	0.0299501	4.20028e-05	0.00194669	0.00291073
C9	0.0134392	0.574061	0.0450064	0.00246789	0.0349286	0.00184331	0.883601	0.000126859	4.0945	9.02248e-05	0.00490505	0.000715456	0.000385494	0.0101136	0.00389546	0.0002251	0.000457342	0.0278126	7.13653e-05	0.467096	0.000543804	0.00573499	4.51324e-06	6.11954e-06	0.000169072	1.95518e-05	0.000232235
C10	0.0179198	4.76489e-05	6.50452e-05	0.00606832	0.00191503	0.0375327	0.000139432	0.913278	9.02248e-05	4.0718	9.59159e-05	0.000862404	0.0060359	0.00035957	0.00183802	0.00751901	0.00687963	0.000100474	0.0292737	6.37199e-06	1.1478e-05	1.08087e-05	0.481982	0.480247	6.40851e-05	0.00492667	0.00341123
C11	0.000519533	0.0377018	0.528463	7.8375e-05	0.000240438	2.50452e-05	0.00220214	4.02857e-05	0.00490505	9.59159e-05	4.01445	0.51694	0.0368592	4.66519e-05	0.000254019	5.21095e-06	3.79291e-06	0.000104915	5.23321e-06	0.000306395	0.46347	0.460227	3.71669e-05	3.19726e-06	0.0198497	0.00622598	0.00608717
C12	0.000699695	0.0149827	0.0402206	9.96532e-05	0.00040789	2.88633e-05	0.000292831	0.000624529	0.000715456	0.000862404	0.51694	3.96716	0.915826	5.96503e-05	0.00132748	8.4034e-06	3.04614e-06	1.98727e-05	4.01378e-05	0.00020583	0.0191966	0.0180874	8.96182e-05	3.90173e-05	0.473128	0.0299287	0.0287863
C13	0.00706999	0.0109025	0.0218107	0.00105275	0.00168687	0.000331992	0.000368567	0.0037893	0.000385494	0.0060359	0.0368592	0.915826	4.08034	0.00013055	0.00378374	8.77565e-05	2.48278e-05	5.16752e-05	0.000208831	0.000116663	0.00939624	0.00614272	0.000737645	0.00021332	0.028934	0.481076	0.468382
H14	0.0244531	0.00145114	0.000563624	0.0051147	0.460145	0.00599281	0.0195898	0.00103279	0.0101136	0.00035957	4.66519e-05	5.96503e-05	0.00013055	0.389584	0.0138253	0.00409179	0.000411802	0.000896835	0.00101399	0.000681578	1.00838e-05	8.76873e-05	2.56693e-05	6.65698e-05	3.81437e-06	3.40633e-06	0.000266364
H15	0.0176694	0.0220185	0.00148637	0.00756542	0.451415	0.00128979	0.0164821	0.00683674	0.00389546	0.00183802	0.000254019	0.00132748	0.00378374	0.0138253	0.364852	0.000168535	0.000120766	0.00446271	0.00451992	0.000301719	5.56984e-05	5.27746e-05	7.12792e-05	0.000124805	5.59592e-05	0.000120779	0.00213341
H16	0.0246527	3.50977e-05	1.59497e-05	0.00722896	0.00432803	0.462198	0.000360453	0.0181408	0.0002251	0.00751901	5.21095e-06	8.4034e-06	8.77565e-05	0.00409179	0.000168535	0.388446	0.0146115	1.57322e-05	0.00195208	1.91623e-05	5.44076e-07	2.58422e-05	0.000826749	0.000469918	3.37066e-06	2.30929e-05	0.000190813
H17	0.0219907	5.79447e-05	2.26878e-05	0.00422578	0.00475421	0.464206	0.000972509	0.0181343	0.000457342	0.00687963	3.79291e-06	3.04614e-06	2.48278e-05	0.000411802	0.000120766	0.0146115	0.391135	2.43339e-05	0.00449812	5.56056e-05	6.83105e-07	3.04278e-06	0.000466013	0.0034542	7.28305e-07	1.7122e-05	2.63767e-05
H18	0.00283682	0.00873198	0.00145757	0.011153	0.0178015	0.000205408	0.46248	0.000165224	0.0278126	0.000100474	0.000104915	1.98727e-05	5.16752e-05	0.000896835	0.00446271	1.57322e-05	2.43339e-05	0.373663	0.000103852	0.00339045	1.70131e-05	8.81259e-05	3.98784e-06	5.04075e-06	4.2312e-06	1.3891e-06	2.7335e-05
H19	0.00132185	0.000148221	2.78708e-05	0.000550444	0.0044643	0.019469	0.000492377	0.471396	7.13653e-05	0.0292737	5.23321e-06	4.01378e-05	0.000208831	0.00101399	0.00451992	0.00195208	0.00449812	0.000103852	0.408299	1.37312e-05	1.48616e-06	1.00177e-06	0.0036647	0.00667621	1.26876e-06	7.0201e-05	8.47029e-05
H20	0.000657381	0.0291119	0.00862832	0.000141526	0.00550968	0.000199573	0.0261794	1.88898e-05	0.467096	6.37199e-06	0.000306395	0.00020583	0.000116663	0.000681578	0.000301719	1.91623e-05	5.56056e-05	0.00339045	1.37312e-05	0.378249	1.82791e-05	0.000183168	4.31785e-07	8.69119e-07	1.52772e-05	5.53135e-06	8.21161e-06
H21	5.16224e-05	0.00888155	0.0270351	9.5581e-06	3.47731e-05	4.31666e-06	0.000378822	1.12014e-05	0.000543804	1.1478e-05	0.46347	0.0191966	0.00939624	1.00838e-05	5.56984e-05	5.44076e-07	6.83105e-07	1.70131e-05	1.48616e-06	1.82791e-05	0.395649	0.0144398	2.13707e-06	1.48318e-06	0.0013446	0.000781173	0.000479569
H22	0.00130033	0.00389989	0.0287934	0.000189253	0.000252756	8.93017e-05	0.00329818	1.06687e-05	0.00573499	1.08087e-05	0.460227	0.0180874	0.00614272	8.76873e-05	5.27746e-05	2.58422e-05	3.04278e-06	8.81259e-05	1.00177e-06	0.000183168	0.0144398	0.388598	1.00864e-06	9.67773e-07	0.00505154	0.000440766	0.0040161
H23	0.000854108	5.5752e-06	1.53315e-05	0.00051585	7.25826e-05	0.0063153	6.97852e-06	0.029777	4.51324e-06	0.481982	3.71669e-05	8.96182e-05	0.000737645	2.56693e-05	7.12792e-05	0.000826749	0.000466013	3.98784e-06	0.0036647	4.31785e-07	2.13707e-06	1.00864e-06	0.40569	0.0166162	1.21778e-05	0.00145799	0.000108821
H24	0.00107532	3.45139e-06	1.79922e-06	0.00036859	0.000174028	0.00618156	2.35224e-05	0.0299501	6.11954e-06	0.480247	3.19726e-06	3.90173e-05	0.00021332	6.65698e-05	0.000124805	0.000469918	0.0034542	5.04075e-06	0.00667621	8.69119e-07	1.48318e-06	9.67773e-07	0.0166162	0.408797	3.01117e-06	0.000204019	0.000201453
H25	0.000352615	0.00053243	0.00694891	6.13789e-05	3.79073e-05	1.25176e-05	8.2587e-05	4.20028e-05	0.000169072	6.40851e-05	0.0198497	0.473128	0.028934	3.81437e-06	5.59592e-05	3.37066e-06	7.28305e-07	4.2312e-06	1.26876e-06	1.52772e-05	0.0013446	0.00505154	1.21778e-05	3.01117e-06	0.411654	0.00363307	0.00627136
H26	0.00056945	0.000313674	0.00153088	0.000113612	6.06965e-05	0.00012165	1.91611e-05	0.00194669	1.95518e-05	0.00492667	0.00622598	0.0299287	0.481076	3.40633e-06	0.000120779	2.30929e-05	1.7122e-05	1.3891e-06	7.0201e-05	5.53135e-06	0.000781173	0.000440766	0.00145799	0.000204019	0.00363307	0.409918	0.0161535
H27	0.0181578	0.000855608	0.00124473	0.00230954	0.0022011	0.000882748	0.000346788	0.00291073	0.000232235	0.00341123	0.00608717	0.0287863	0.468382	0.000266364	0.00213341	0.000190813	2.63767e-05	2.7335e-05	8.47029e-05	8.21161e-06	0.000479569	0.0040161	0.000108821	0.000201453	0.00627136	0.0161535	0.392104
LDM — ajoene_z_31_LIDI_matrix
	S1	S2	S3	O4	C5	C6	C7	C8	C9	C10	C11	C12	C13	H14	H15	H16	H17	H18	H19	H20	H21	H22	H23	H24	H25	H26	H27
S1	12.9445	0.00538409	0.00167398	0.685308	0.45514	0.464904	0.0285258	0.0265205	0.0187942	0.0150677	0.000161197	0.000292981	0.000651465	0.021191	0.0204575	0.023897	0.0221797	0.00140931	0.00354631	0.000949469	0.000144413	5.11628e-05	0.00095774	0.000899701	2.01995e-05	2.31257e-05	0.000658353		92.2085	31.7928
S2	0.00538409	14.4433	0.634367	0.0373482	0.0186852	0.00132304	0.0542915	0.000151411	0.572984	0.000145585	0.0369583	0.0156623	0.00893734	0.0193455	0.00195279	0.00254777	0.000143913	0.0091688	5.51937e-05	0.0288249	0.00335927	0.00871466	7.01764e-06	5.25146e-05	0.000705911	0.000282267	0.000473101
S3	0.00167398	0.634367	14.6597	0.00548596	0.00211187	0.00019585	0.0178878	2.8526e-05	0.0463535	7.10637e-05	0.531848	0.039434	0.0199792	0.00122796	0.000282311	0.000249557	5.23666e-05	0.00156737	1.1338e-05	0.00909279	0.0290189	0.0265827	4.51704e-06	0.000123392	0.0078429	0.00151582	0.00131381
O4	0.685308	0.0373482	0.00548596	8.32137	0.0604345	0.0628888	0.0164465	0.00954425	0.0151876	0.00561949	0.0003335	0.000104214	0.000167279	0.00287288	0.00770062	0.00644899	0.00472752	0.000444173	0.000723247	0.000387346	8.06996e-05	0.000192761	0.000593259	0.00031369	1.22865e-05	1.03534e-05	0.000230848
C5	0.45514	0.0186852	0.00211187	0.0604345	4.07132	0.0242822	0.523797	0.00881206	0.0347121	0.00618232	0.000325548	0.00119209	0.0037529	0.442642	0.466501	0.00462341	0.00448607	0.0191339	0.000356773	0.00537862	0.000341046	5.99855e-05	0.000152654	0.000774843	9.16473e-05	9.58318e-05	0.00349597
C6	0.464904	0.00132304	0.00019585	0.0628888	0.0242822	4.06821	0.00404569	0.520791	0.00167854	0.0370062	3.11518e-05	6.63228e-05	0.000307583	0.00735582	0.0012082	0.458328	0.463979	0.000322967	0.0197732	0.000164525	1.08568e-05	9.2334e-06	0.00631959	0.00612058	2.88761e-06	5.50253e-05	5.27859e-05
C7	0.0285258	0.0542915	0.0178878	0.0164465	0.523797	0.00404569	3.95714	0.00110625	0.869767	0.000539692	0.00249917	0.000383714	0.000579096	0.017483	0.018342	0.000366495	0.000964459	0.47336	2.85819e-05	0.0258413	0.00408263	0.000366944	1.12706e-05	7.99722e-05	0.000108791	3.57355e-05	0.000577335
C8	0.0265205	0.000151411	2.8526e-05	0.00954425	0.00881206	0.520791	0.00110625	3.98097	0.000250408	0.91587	4.7592e-06	4.18596e-05	0.000273048	0.00193734	0.00667545	0.017387	0.0190372	5.23548e-05	0.474266	5.4055e-05	1.25347e-06	2.04098e-06	0.0300703	0.0297666	3.75486e-06	0.000190642	0.000292119
C9	0.0187942	0.572984	0.0463535	0.0151876	0.0347121	0.00167854	0.869767	0.000250408	4.07509	0.00036556	0.00525958	0.000740403	0.000346655	0.00640315	0.00527224	0.000244797	0.000590529	0.029627	1.83117e-05	0.467319	0.00597739	0.000582725	1.56873e-05	3.72664e-05	0.00016998	1.90066e-05	0.000210094
C10	0.0150677	0.000145585	7.10637e-05	0.00561949	0.00618232	0.0370062	0.000539692	0.91587	0.00036556	4.07835	2.75663e-05	0.000294937	0.0018702	0.00288686	0.00532366	0.00591742	0.00951459	3.88576e-05	0.0297376	2.68989e-05	3.45447e-06	6.94317e-06	0.483346	0.476517	2.05212e-05	0.00161898	0.000892929
C11	0.000161197	0.0369583	0.531848	0.0003335	0.000325548	3.11518e-05	0.00249917	4.7592e-06	0.00525958	2.75663e-05	4.01309	0.516144	0.0364165	0.0004722	5.70311e-05	4.3867e-05	5.14758e-06	0.000122114	2.25654e-06	0.000331108	0.461018	0.463178	1.7113e-06	0.000110123	0.0194701	0.00622924	0.00622128
C12	0.000292981	0.0156623	0.039434	0.000104214	0.00119209	6.63228e-05	0.000383714	4.18596e-05	0.000740403	0.000294937	0.516144	3.95941	0.913693	0.00336065	5.15202e-05	0.000264953	4.20478e-06	4.32988e-05	2.15448e-05	0.000214178	0.0184628	0.0197212	1.99688e-05	0.00107138	0.471752	0.0301484	0.0297547
C13	0.000651465	0.00893734	0.0199792	0.000167279	0.0037529	0.000307583	0.000579096	0.000273048	0.000346655	0.0018702	0.0364165	0.913693	4.0837	0.00995182	0.000224305	0.000713678	2.2602e-05	8.59602e-05	0.000100618	0.000101043	0.00632893	0.0100176	0.000115247	0.00506494	0.0287761	0.482435	0.477014
H14	0.021191	0.0193455	0.00122796	0.00287288	0.442642	0.00735582	0.017483	0.00193734	0.00640315	0.00288686	0.0004722	0.00336065	0.00995182	0.356524	0.0135505	0.00489265	0.000498681	0.00350335	0.000132407	0.000361774	0.000204547	0.000130465	0.000121084	0.00136075	0.000141244	0.000321676	0.00524354
H15	0.0204575	0.00195279	0.000282311	0.00770062	0.466501	0.0012082	0.018342	0.00667545	0.00527224	0.00532366	5.70311e-05	5.15202e-05	0.000224305	0.0135505	0.39535	0.000224295	0.000118119	0.00260055	0.000266754	0.000531562	2.50408e-05	7.64635e-06	0.00012973	0.000181513	1.52272e-05	1.69675e-05	0.000396316
H16	0.023897	0.00254777	0.000249557	0.00644899	0.00462341	0.458328	0.000366495	0.017387	0.000244797	0.00591742	4.3867e-05	0.000264953	0.000713678	0.00489265	0.000224295	0.381819	0.014257	0.000107691	0.00499068	5.68237e-05	2.86986e-06	1.38946e-05	0.000415814	0.00361198	7.00869e-06	0.000110031	5.08093e-05
H17	0.0221797	0.000143913	5.23666e-05	0.00472752	0.00448607	0.463979	0.000964459	0.0190372	0.000590529	0.00951459	5.14758e-06	4.20478e-06	2.2602e-05	0.000498681	0.000118119	0.014257	0.389908	8.34488e-05	0.0014763	4.36221e-05	3.958e-06	1.32289e-06	0.000800234	0.000497146	2.77823e-07	3.14511e-06	8.87975e-06
H18	0.00140931	0.0091688	0.00156737	0.000444173	0.0191339	0.000322967	0.47336	5.23548e-05	0.029627	3.88576e-05	0.000122114	4.32988e-05	8.59602e-05	0.00350335	0.00260055	0.000107691	8.34488e-05	0.405446	2.73724e-06	0.00338681	0.000115608	1.80978e-05	1.07991e-06	2.02139e-05	5.26092e-06	1.20023e-06	3.80335e-05
H19	0.00354631	5.51937e-05	1.1338e-05	0.000723247	0.000356773	0.0197732	2.85819e-05	0.474266	1.83117e-05	0.0297376	2.25654e-06	2.15448e-05	0.000100618	0.000132407	0.000266754	0.00499068	0.0014763	2.73724e-06	0.410829	2.20249e-06	1.99763e-07	5.88933e-07	0.0036829	0.00659221	6.98293e-07	0.000102816	2.4504e-05
H20	0.000949469	0.0288249	0.00909279	0.000387346	0.00537862	0.000164525	0.0258413	5.4055e-05	0.467319	2.68989e-05	0.000331108	0.000214178	0.000101043	0.000361774	0.000531562	5.68237e-05	4.36221e-05	0.00338681	2.20249e-06	0.38024	0.000211454	1.94778e-05	6.61273e-07	1.78234e-06	2.17808e-05	6.03712e-06	8.35835e-06
H21	0.000144413	0.00335927	0.0290189	8.06996e-05	0.000341046	1.08568e-05	0.00408263	1.25347e-06	0.00597739	3.45447e-06	0.461018	0.0184628	0.00632893	0.000204547	2.50408e-05	2.86986e-06	3.958e-06	0.000115608	1.99763e-07	0.000211454	0.393954	0.014562	1.55646e-07	4.31365e-06	0.00513243	0.000470961	0.0042609
H22	5.11628e-05	0.00871466	0.0265827	0.000192761	5.99855e-05	9.2334e-06	0.000366944	2.04098e-06	0.000582725	6.94317e-06	0.463178	0.0197212	0.0100176	0.000130465	7.64635e-06	1.38946e-05	1.32289e-06	1.80978e-05	5.88933e-07	1.94778e-05	0.014562	0.395449	4.99349e-07	1.74849e-05	0.00115755	0.000777325	0.00049377
H23	0.00095774	7.01764e-06	4.51704e-06	0.000593259	0.000152654	0.00631959	1.12706e-05	0.0300703	1.56873e-05	0.483346	1.7113e-06	1.99688e-05	0.000115247	0.000121084	0.00012973	0.000415814	0.000800234	1.07991e-06	0.0036829	6.61273e-07	1.55646e-07	4.99349e-07	0.408132	0.0164641	6.82447e-07	0.000113743	2.60134e-05
H24	0.000899701	5.25146e-05	0.000123392	0.00031369	0.000774843	0.00612058	7.99722e-05	0.0297666	3.72664e-05	0.476517	0.000110123	0.00107138	0.00506494	0.00136075	0.000181513	0.00361198	0.000497146	2.02139e-05	0.00659221	1.78234e-06	4.31365e-06	1.74849e-05	0.0164641	0.404271	4.60551e-05	0.0035709	0.00105775
H25	2.01995e-05	0.000705911	0.0078429	1.22865e-05	9.16473e-05	2.88761e-06	0.000108791	3.75486e-06	0.00016998	2.05212e-05	0.0194701	0.471752	0.0287761	0.000141244	1.52272e-05	7.00869e-06	2.77823e-07	5.26092e-06	6.98293e-07	2.17808e-05	0.00513243	0.00115755	6.82447e-07	4.60551e-05	0.407097	0.00363789	0.00663875
H26	2.31257e-05	0.000282267	0.00151582	1.03534e-05	9.58318e-05	5.50253e-05	3.57355e-05	0.000190642	1.90066e-05	0.00161898	0.00622924	0.0301484	0.482435	0.000321676	1.69675e-05	0.000110031	3.14511e-06	1.20023e-06	0.000102816	6.03712e-06	0.000470961	0.000777325	0.000113743	0.0035709	0.00363789	0.41272	0.0170177
H27	0.000658353	0.000473101	0.00131381	0.000230848	0.00349597	5.27859e-05	0.000577335	0.000292119	0.000210094	0.000892929	0.00622128	0.0297547	0.477014	0.00524354	0.000396316	5.08093e-05	8.87975e-06	3.80335e-05	2.4504e-05	8.35835e-06	0.0042609	0.00049377	2.60134e-05	0.00105775	0.00663875	0.0170177	0.41063
LDM — ajoene_z_32_LIDI_matrix
	S1	S2	S3	O4	C5	C6	C7	C8	C9	C10	C11	C12	C13	H14	H15	H16	H17	H18	H19	H20	H21	H22	H23	H24	H25	H26	H27
S1	12.9444	0.00357482	0.000648462	0.681964	0.467207	0.464517	0.0291557	0.0276481	0.0128365	0.0170954	0.000187532	0.000875877	0.000138928	0.0218028	0.0219296	0.0200777	0.0228099	0.00573136	0.00198059	0.000681714	2.9805e-05	4.98657e-05	0.000794868	0.0013027	0.00154601	0.000100521	2.29136e-05		92.2794	31.7211
S2	0.00357482	14.5308	0.650488	0.00148078	0.0175023	0.000318548	0.0601003	0.00109883	0.575368	0.00181844	0.0371948	0.00814389	0.00164683	0.00164737	0.0219594	4.33892e-05	8.80029e-05	0.00918307	9.46201e-05	0.0282661	0.00618	0.00843763	3.78514e-05	0.000207855	0.00602168	0.000136537	0.000318505
S3	0.000648462	0.650488	14.641	0.000317592	0.00198281	0.000102011	0.0134788	5.48116e-05	0.0425675	0.000151755	0.526696	0.0389534	0.0230624	0.000381412	0.00163248	8.50394e-06	1.97134e-05	0.00150355	2.48096e-05	0.0105009	0.0310246	0.0268777	4.80963e-06	1.76515e-05	0.00176756	0.00147263	0.00112807
O4	0.681964	0.00148078	0.000317592	8.33582	0.0612393	0.0609791	0.0131181	0.0144272	0.0044541	0.00318512	0.000947448	0.0118435	0.00195399	0.00861393	0.00369115	0.00837196	0.0034431	0.00128881	0.0109597	0.000154422	8.64342e-05	0.000301941	0.000463987	0.000278827	0.0255068	0.0015012	0.000345078
C5	0.467207	0.0175023	0.00198281	0.0612393	4.07641	0.0248194	0.517971	0.00819452	0.0349797	0.00501966	0.000171179	0.000288405	6.62287e-05	0.464495	0.445786	0.00408848	0.00478404	0.0190899	0.000206743	0.00541124	2.93856e-05	4.19122e-05	0.000369531	0.000159399	0.000634176	1.06606e-05	1.39201e-05
C6	0.464517	0.000318548	0.000102011	0.0609791	0.0248194	4.06606	0.00470981	0.517254	0.00163776	0.0374443	1.85229e-05	8.74753e-05	2.66022e-05	0.00301232	0.00390153	0.465936	0.464925	0.000341434	0.0186955	0.000154991	8.84955e-06	1.12734e-05	0.00627034	0.00633996	0.000173248	3.95703e-05	1.73487e-06
C7	0.0291557	0.0601003	0.0134788	0.0131181	0.517971	0.00470981	3.95398	0.000785247	0.88052	0.000513211	0.00164122	0.00214066	0.00096649	0.0192277	0.0162142	0.000478533	0.00100173	0.469815	2.56198e-05	0.0255438	0.00013466	0.000688806	5.2709e-05	1.87833e-05	0.00291678	4.89441e-05	7.3364e-05
C8	0.0276481	0.00109883	5.48116e-05	0.0144272	0.00819452	0.517254	0.000785247	3.97394	0.000163502	0.915553	3.90036e-05	6.98839e-05	1.00908e-05	0.000472157	0.0120324	0.017753	0.0190831	0.000255738	0.465808	1.93717e-05	6.73738e-05	3.06615e-06	0.0305619	0.0298375	0.000234684	3.38548e-06	3.65803e-06
C9	0.0128365	0.575368	0.0425675	0.0044541	0.0349797	0.00163776	0.88052	0.000163502	4.08398	0.00024465	0.00213464	0.00663848	0.00167807	0.0101238	0.00404982	0.000191731	0.000514522	0.0294755	1.41675e-05	0.465374	0.000342254	0.000398289	1.45322e-05	1.69683e-05	0.00551609	8.17551e-05	0.00013007
C10	0.0170954	0.00181844	0.000151755	0.00318512	0.00501966	0.0374443	0.000513211	0.915553	0.00024465	4.07911	3.35278e-05	1.81694e-05	5.91586e-06	0.000323687	0.0104107	0.00597804	0.00979534	0.000259227	0.0276244	4.24977e-05	6.21445e-05	2.04736e-06	0.481626	0.482694	9.9422e-05	2.13081e-06	1.00882e-06
C11	0.000187532	0.0371948	0.526696	0.000947448	0.000171179	1.85229e-05	0.00164122	3.90036e-05	0.00213464	3.35278e-05	4.012	0.516435	0.0384139	4.03978e-05	0.000154995	4.24251e-06	3.63562e-06	0.000103539	4.36915e-05	0.000330766	0.465515	0.463573	5.19971e-07	1.21248e-05	0.0172179	0.00634746	0.0064493
C12	0.000875877	0.00814389	0.0389534	0.0118435	0.000288405	8.74753e-05	0.00214066	6.98839e-05	0.00663848	1.81694e-05	0.516435	3.99113	0.921623	4.43971e-05	0.000137473	2.25519e-05	6.78778e-06	8.16674e-05	0.000158917	0.000550055	0.0190553	0.0180898	2.21859e-06	2.43228e-06	0.449443	0.0297542	0.0311759
C13	0.000138928	0.00164683	0.0230624	0.00195399	6.62287e-05	2.66022e-05	0.00096649	1.00908e-05	0.00167807	5.91586e-06	0.0384139	0.921623	4.08808	2.92539e-05	2.56199e-05	4.01363e-06	3.74019e-06	4.66317e-05	4.32676e-05	0.000204997	0.00841409	0.00676532	4.32082e-07	2.01676e-06	0.0258149	0.482243	0.483139
H14	0.0218028	0.00164737	0.000381412	0.00861393	0.464495	0.00301232	0.0192277	0.000472157	0.0101238	0.000323687	4.03978e-05	4.43971e-05	2.92539e-05	0.400144	0.0139731	0.00282912	0.000239233	0.000941049	7.71641e-05	0.000701554	5.3262e-06	1.93433e-05	0.000134332	1.53485e-05	6.4963e-05	2.29408e-06	1.82079e-06
H15	0.0219296	0.0219594	0.00163248	0.00369115	0.445786	0.00390153	0.0162142	0.0120324	0.00404982	0.0104107	0.000154995	0.000137473	2.56199e-05	0.0139731	0.354783	0.000289476	0.000281136	0.00454827	0.000341624	0.000280219	4.40361e-05	2.00775e-05	0.000652773	0.000257594	0.000310987	3.01224e-06	9.09677e-06
H16	0.0200777	4.33892e-05	8.50394e-06	0.00837196	0.00408848	0.465936	0.000478533	0.017753	0.000191731	0.00597804	4.24251e-06	2.25519e-05	4.01363e-06	0.00282912	0.000289476	0.402039	0.0148985	1.77969e-05	0.00499755	2.48449e-05	2.91456e-06	1.61161e-06	0.00387518	0.000445981	4.08373e-05	7.71876e-06	3.08657e-07
H17	0.0228099	8.80029e-05	1.97134e-05	0.0034431	0.00478404	0.464925	0.00100173	0.0190831	0.000514522	0.00979534	3.63562e-06	6.78778e-06	3.74019e-06	0.000239233	0.000281136	0.0148985	0.391823	1.41955e-05	0.0011409	5.53538e-05	1.01119e-06	1.38051e-06	0.000475515	0.000769912	8.80683e-06	1.22704e-06	2.73207e-07
H18	0.00573136	0.00918307	0.00150355	0.00128881	0.0190899	0.000341434	0.469815	0.000255738	0.0294755	0.000259227	0.000103539	8.16674e-05	4.66317e-05	0.000941049	0.00454827	1.77969e-05	1.41955e-05	0.40163	5.77989e-06	0.00358551	8.83511e-06	4.112e-05	1.23826e-05	1.10914e-05	7.161e-05	4.61375e-06	3.96989e-06
H19	0.00198059	9.46201e-05	2.48096e-05	0.0109597	0.000206743	0.0186955	2.56198e-05	0.465808	1.41675e-05	0.0276244	4.36915e-05	0.000158917	4.32676e-05	7.71641e-05	0.000341624	0.00499755	0.0011409	5.77989e-06	0.382206	1.66254e-06	4.64425e-05	2.94748e-06	0.00648697	0.00352071	0.000240275	3.93315e-06	8.75208e-06
H20	0.000681714	0.0282661	0.0105009	0.000154422	0.00541124	0.000154991	0.0255438	1.93717e-05	0.465374	4.24977e-05	0.000330766	0.000550055	0.000204997	0.000701554	0.000280219	2.48449e-05	5.53538e-05	0.00358551	1.66254e-06	0.373783	0.000189906	1.47805e-05	1.96958e-06	3.98338e-06	0.000111258	7.05079e-06	7.9143e-06
H21	2.9805e-05	0.00618	0.0310246	8.64342e-05	2.93856e-05	8.84955e-06	0.00013466	6.73738e-05	0.000342254	6.21445e-05	0.465515	0.0190553	0.00841409	5.3262e-06	4.40361e-05	2.91456e-06	1.01119e-06	8.83511e-06	4.64425e-05	0.000189906	0.397475	0.0148703	2.75591e-06	2.05335e-05	0.00139837	0.000798607	0.000466321
H22	4.98657e-05	0.00843763	0.0268777	0.000301941	4.19122e-05	1.12734e-05	0.000688806	3.06615e-06	0.000398289	2.04736e-06	0.463573	0.0180898	0.00676532	1.93433e-05	2.00775e-05	1.61161e-06	1.38051e-06	4.112e-05	2.94748e-06	1.47805e-05	0.0148703	0.401522	1.31931e-07	6.98075e-07	0.0043932	0.000491221	0.0043076
H23	0.000794868	3.78514e-05	4.80963e-06	0.000463987	0.000369531	0.00627034	5.2709e-05	0.0305619	1.45322e-05	0.481626	5.19971e-07	2.21859e-06	4.32082e-07	0.000134332	0.000652773	0.00387518	0.000475515	1.23826e-05	0.00648697	1.96958e-06	2.75591e-06	1.31931e-07	0.416645	0.0168719	6.90177e-06	2.17796e-07	4.9859e-08
H24	0.0013027	0.000207855	1.76515e-05	0.000278827	0.000159399	0.00633996	1.87833e-05	0.0298375	1.69683e-05	0.482694	1.21248e-05	2.43228e-06	2.01676e-06	1.53485e-05	0.000257594	0.000445981	0.000769912	1.10914e-05	0.00352071	3.98338e-06	2.05335e-05	6.98075e-07	0.0168719	0.405728	4.02551e-06	2.9345e-07	1.17709e-07
H25	0.00154601	0.00602168	0.00176756	0.0255068	0.000634176	0.000173248	0.00291678	0.000234684	0.00551609	9.9422e-05	0.0172179	0.449443	0.0258149	6.4963e-05	0.000310987	4.08373e-05	8.80683e-06	7.161e-05	0.000240275	0.000111258	0.00139837	0.0043932	6.90177e-06	4.02551e-06	0.345937	0.00329726	0.0060583
H26	0.000100521	0.000136537	0.00147263	0.0015012	1.06606e-05	3.95703e-05	4.89441e-05	3.38548e-06	8.17551e-05	2.13081e-06	0.00634746	0.0297542	0.482243	2.29408e-06	3.01224e-06	7.71876e-06	1.22704e-06	4.61375e-06	3.93315e-06	7.05079e-06	0.000798607	0.000491221	2.17796e-07	2.9345e-07	0.00329726	0.404402	0.0171319
H27	2.29136e-05	0.000318505	0.00112807	0.000345078	1.39201e-05	1.73487e-06	7.3364e-05	3.65803e-06	0.00013007	1.00882e-06	0.0064493	0.0311759	0.483139	1.82079e-06	9.09677e-06	3.08657e-07	2.73207e-07	3.96989e-06	8.75208e-06	7.9143e-06	0.000466321	0.0043076	4.9859e-08	1.17709e-07	0.0060583	0.0171319	0.424628
LDM — ajoene_z_33_LIDI_matrix
	S1	S2	S3	O4	C5	C6	C7	C8	C9	C10	C11	C12	C13	H14	H15	H16	H17	H18	H19	H20	H21	H22	H23	H24	H25	H26	H27
S1	12.8976	0.00217467	0.0021664	0.686923	0.4627	0.461799	0.0329199	0.0290525	0.0149714	0.0148181	0.00697744	0.000683677	0.000367291	0.0170248	0.0249955	0.0234222	0.0218318	0.00255015	0.00371977	0.00068629	0.0175268	0.000409107	0.000861224	0.000864601	8.36901e-05	2.0295e-05	3.67654e-05		92.3093	31.6911
S2	0.00217467	14.5685	0.640594	0.00113583	0.0184123	0.000344148	0.0509657	0.000721036	0.569142	0.00206695	0.0385345	0.00945509	0.00476835	0.0235928	0.00122576	4.55437e-05	7.72738e-05	0.00882857	4.64279e-05	0.02968	0.005214	0.00522084	0.00018389	0.000123354	0.000539829	0.000238914	0.000469699
S3	0.0021664	0.640594	14.6361	0.000385906	0.00178831	0.000221287	0.0214267	0.000591725	0.0457826	0.000475908	0.52781	0.0410462	0.0202292	0.00115462	0.000616964	3.77868e-05	3.82811e-05	0.00158073	0.000494423	0.00449621	0.0268295	0.0286612	2.86251e-05	0.000130761	0.0055085	0.00122586	0.00110078
O4	0.686923	0.00113583	0.000385906	8.37497	0.0635195	0.0623846	0.00740844	0.00910746	0.00246585	0.00543953	0.00103119	0.000108918	7.90874e-05	0.00729726	0.00865922	0.00427956	0.00642534	0.00479323	0.000563418	0.00014251	0.00217572	7.68299e-05	0.000325619	0.000576619	2.60786e-05	7.39732e-06	8.63518e-06
C5	0.4627	0.0184123	0.00178831	0.0635195	4.08098	0.0251404	0.519172	0.0059417	0.0341831	0.00468205	0.00125586	0.000161118	0.000106438	0.44872	0.459821	0.00646349	0.00404692	0.0183063	0.000340625	0.00547064	0.00257639	0.000131771	0.000826316	0.00012824	1.07807e-05	4.42183e-06	8.92453e-06
C6	0.461799	0.000344148	0.000221287	0.0623846	0.0251404	4.07083	0.00510534	0.519885	0.00244904	0.0369333	0.000343525	6.31412e-05	3.88851e-05	0.00348783	0.00348989	0.462975	0.462332	0.000189644	0.0194797	0.000205506	0.000788982	0.000244775	0.00609854	0.00632016	9.41193e-06	1.17124e-05	2.74442e-06
C7	0.0329199	0.0509657	0.0214267	0.00740844	0.519172	0.00510534	3.96348	0.000616932	0.884782	0.000448324	0.00196025	0.000448287	0.000568403	0.0164718	0.0191417	0.000632011	0.000987885	0.466864	2.40891e-05	0.0268638	0.00379555	0.00014065	0.000117589	1.28532e-05	1.82087e-05	2.08462e-05	3.37008e-05
C8	0.0290525	0.000721036	0.000591725	0.00910746	0.0059417	0.519885	0.000616932	3.97689	0.000162447	0.912355	0.0038807	0.000416474	0.000229373	0.00810239	0.000429918	0.0178045	0.0186676	0.000163945	0.471019	1.67921e-05	0.00174931	0.00547887	0.0298965	0.0298132	5.41653e-05	7.65664e-05	5.73702e-06
C9	0.0149714	0.569142	0.0457826	0.00246585	0.0341831	0.00244904	0.884782	0.000162447	4.08929	0.000371617	0.00396387	0.000604637	0.000289659	0.0038044	0.00894718	0.00023425	0.0005446	0.0285355	1.42239e-05	0.469187	0.00438106	0.000419162	2.83465e-05	1.74144e-05	6.77679e-05	2.27205e-05	3.38014e-05
C10	0.0148181	0.00206695	0.000475908	0.00543953	0.00468205	0.0369333	0.000448324	0.912355	0.000371617	4.07452	0.00270074	0.000227226	6.40601e-05	0.00914695	0.000309698	0.00589081	0.0092748	0.00016922	0.0290159	6.35319e-05	0.000784042	0.00540675	0.479597	0.482062	7.27889e-05	6.27204e-05	4.87305e-06
C11	0.00697744	0.0385345	0.52781	0.00103119	0.00125586	0.000343525	0.00196025	0.0038807	0.00396387	0.00270074	4.01211	0.515664	0.0376328	0.00127724	8.89919e-05	8.9821e-05	2.22849e-05	9.16418e-05	0.00189014	0.000324386	0.45075	0.460201	7.10096e-05	0.000489411	0.019503	0.00638882	0.00632988
C12	0.000683677	0.00945509	0.0410462	0.000108918	0.000161118	6.31412e-05	0.000448287	0.000416474	0.000604637	0.000227226	0.515664	3.97791	0.920683	0.000138494	4.0737e-05	2.37564e-05	6.25675e-06	2.336e-05	0.000746717	4.23676e-05	0.0185989	0.0178384	1.63352e-05	5.34338e-05	0.473154	0.0303793	0.0300931
C13	0.000367291	0.00476835	0.0202292	7.90874e-05	0.000106438	3.88851e-05	0.000568403	0.000229373	0.000289659	6.40601e-05	0.0376328	0.920683	4.08195	7.38237e-05	7.14941e-06	1.31353e-05	4.83658e-06	2.63255e-05	0.000692904	1.84229e-05	0.00873864	0.00645136	1.12445e-05	5.08119e-05	0.0293078	0.481115	0.483393
H14	0.0170248	0.0235928	0.00115462	0.00729726	0.44872	0.00348783	0.0164718	0.00810239	0.0038044	0.00914695	0.00127724	0.000138494	7.38237e-05	0.357727	0.0131632	0.000693518	0.000387564	0.00455659	0.000180432	0.000306578	0.0012323	0.000398761	0.00170071	0.000256203	1.12148e-05	3.77427e-06	6.4539e-06
H15	0.0249955	0.00122576	0.000616964	0.00865922	0.459821	0.00348989	0.0191417	0.000429918	0.00894718	0.000309698	8.89919e-05	4.0737e-05	7.14941e-06	0.0131632	0.382589	0.0034154	0.000203283	0.00120904	0.00011936	0.00066584	0.000342692	1.04855e-05	0.000110004	1.74639e-05	3.56592e-06	5.64757e-07	1.34538e-06
H16	0.0234222	4.55437e-05	3.77868e-05	0.00427956	0.00646349	0.462975	0.000632011	0.0178045	0.00023425	0.00589081	8.9821e-05	2.37564e-05	1.31353e-05	0.000693518	0.0034154	0.393825	0.0144466	2.93167e-05	0.00492971	2.949e-05	0.000178903	4.98564e-05	0.00361419	0.000416192	1.98499e-06	5.41953e-06	4.84102e-07
H17	0.0218318	7.72738e-05	3.82811e-05	0.00642534	0.00404692	0.462332	0.000987885	0.0186676	0.0005446	0.0092748	2.22849e-05	6.25675e-06	4.83658e-06	0.000387564	0.000203283	0.0144466	0.383873	1.85532e-05	0.00156851	5.3442e-05	2.54117e-05	4.42712e-05	0.000497004	0.000790968	7.42778e-07	8.31582e-07	2.0154e-07
H18	0.00255015	0.00882857	0.00158073	0.00479323	0.0183063	0.000189644	0.466864	0.000163945	0.0285355	0.00016922	9.16418e-05	2.336e-05	2.63255e-05	0.00455659	0.00120904	2.93167e-05	1.85532e-05	0.386838	4.31278e-06	0.00342095	8.87979e-05	1.32606e-05	2.93683e-05	5.42169e-06	1.58711e-06	1.17256e-06	1.2183e-06
H19	0.00371977	4.64279e-05	0.000494423	0.000563418	0.000340625	0.0194797	2.40891e-05	0.471019	1.42239e-05	0.0290159	0.00189014	0.000746717	0.000692904	0.000180432	0.00011936	0.00492971	0.00156851	4.31278e-06	0.404257	1.14871e-06	0.000721447	0.0017081	0.00671807	0.00366161	2.96654e-05	0.000152444	2.31973e-05
H20	0.00068629	0.02968	0.00449621	0.00014251	0.00547064	0.000205506	0.0268638	1.67921e-05	0.469187	6.35319e-05	0.000324386	4.23676e-05	1.84229e-05	0.000306578	0.00066584	2.949e-05	5.3442e-05	0.00342095	1.14871e-06	0.382136	9.08401e-05	0.000113557	5.03567e-06	3.25887e-06	1.09206e-05	2.18689e-06	2.55494e-06
H21	0.0175268	0.005214	0.0268295	0.00217572	0.00257639	0.000788982	0.00379555	0.00174931	0.00438106	0.000784042	0.45075	0.0185989	0.00873864	0.0012323	0.000342692	0.000178903	2.54117e-05	8.87979e-05	0.000721447	9.08401e-05	0.377252	0.0144654	3.52134e-05	6.20532e-05	0.00163121	0.000527289	0.000754697
H22	0.000409107	0.00522084	0.0286612	7.68299e-05	0.000131771	0.000244775	0.00014065	0.00547887	0.000419162	0.00540675	0.460201	0.0178384	0.00645136	0.000398761	1.04855e-05	4.98564e-05	4.42712e-05	1.32606e-05	0.0017081	0.000113557	0.0144654	0.393133	0.000170349	0.00123359	0.00492348	0.00406963	0.000466136
H23	0.000861224	0.00018389	2.86251e-05	0.000325619	0.000826316	0.00609854	0.000117589	0.0298965	2.83465e-05	0.479597	7.10096e-05	1.63352e-05	1.12445e-05	0.00170071	0.000110004	0.00361419	0.000497004	2.93683e-05	0.00671807	5.03567e-06	3.52134e-05	0.000170349	0.408907	0.0165204	1.35785e-06	5.54951e-06	2.20035e-07
H24	0.000864601	0.000123354	0.000130761	0.000576619	0.00012824	0.00632016	1.28532e-05	0.0298132	1.74144e-05	0.482062	0.000489411	5.34338e-05	5.08119e-05	0.000256203	1.74639e-05	0.000416192	0.000790968	5.42169e-06	0.00366161	3.25887e-06	6.20532e-05	0.00123359	0.0165204	0.405028	3.82868e-05	7.33646e-05	6.20995e-06
H25	8.36901e-05	0.000539829	0.0055085	2.60786e-05	1.07807e-05	9.41193e-06	1.82087e-05	5.41653e-05	6.77679e-05	7.27889e-05	0.019503	0.473154	0.0293078	1.12148e-05	3.56592e-06	1.98499e-06	7.42778e-07	1.58711e-06	2.96654e-05	1.09206e-05	0.00163121	0.00492348	1.35785e-06	3.82868e-05	0.407251	0.00676061	0.00361706
H26	2.0295e-05	0.000238914	0.00122586	7.39732e-06	4.42183e-06	1.17124e-05	2.08462e-05	7.65664e-05	2.27205e-05	6.27204e-05	0.00638882	0.0303793	0.481115	3.77427e-06	5.64757e-07	5.41953e-06	8.31582e-07	1.17256e-06	0.000152444	2.18689e-06	0.000527289	0.00406963	5.54951e-06	7.33646e-05	0.00676061	0.413186	0.0168106
H27	3.67654e-05	0.000469699	0.00110078	8.63518e-06	8.92453e-06	2.74442e-06	3.37008e-05	5.73702e-06	3.38014e-05	4.87305e-06	0.00632988	0.0300931	0.483393	6.4539e-06	1.34538e-06	4.84102e-07	2.0154e-07	1.2183e-06	2.31973e-05	2.55494e-06	0.000754697	0.000466136	2.20035e-07	6.20995e-06	0.00361706	0.0168106	0.408264
LDM — ajoene_z_34_LIDI_matrix
	S1	S2	S3	O4	C5	C6	C7	C8	C9	C10	C11	C12	C13	H14	H15	H16	H17	H18	H19	H20	H21	H22	H23	H24	H25	H26	H27
S1	12.9122	0.00246713	0.000764514	0.682979	0.467513	0.463297	0.0296737	0.027276	0.0115546	0.0166919	0.000292908	0.00240266	0.0105197	0.0239399	0.0187614	0.020026	0.0228083	0.00380011	0.00206603	0.000642057	6.18055e-05	1.82309e-05	0.00129973	0.0007613	0.000131598	0.000645585	0.011892		92.2789	31.7231
S2	0.00246713	14.5371	0.648755	0.0013766	0.0174011	0.000283208	0.0587199	6.64339e-05	0.57305	0.000117665	0.0380922	0.0125054	0.00764792	0.00155285	0.0209109	4.4057e-05	6.13531e-05	0.00878196	3.20515e-06	0.0290876	0.00857118	0.00502564	4.6507e-06	1.21044e-05	0.000594929	0.00133369	0.000271133
S3	0.000764514	0.648755	14.6415	0.000282861	0.00193555	8.12828e-05	0.0151431	2.4614e-05	0.0427806	5.53801e-05	0.528961	0.0379911	0.0204201	0.000467623	0.00137754	1.05967e-05	1.68303e-05	0.00145678	1.58948e-06	0.00880404	0.0270502	0.02971	2.31368e-06	4.28825e-06	0.00661191	0.00129717	0.00143537
O4	0.682979	0.0013766	0.000282861	8.3648	0.0615949	0.0612852	0.0117083	0.0135297	0.00212922	0.00317846	5.38741e-05	0.000319566	0.00103073	0.00483658	0.00776672	0.00844603	0.0035697	0.0119337	0.0108142	0.000146087	1.50657e-05	4.61401e-06	0.000291772	0.00048386	3.01416e-05	0.000110472	0.00116258
C5	0.467513	0.0174011	0.00193555	0.0615949	4.08128	0.024899	0.517589	0.00875413	0.0350612	0.00509526	0.000210281	0.00122499	0.0032629	0.450686	0.456291	0.00378662	0.00482184	0.017766	0.000221289	0.00552914	6.20866e-05	2.348e-05	0.000161848	0.00033397	7.09029e-05	0.000378812	0.00056335
C6	0.463297	0.000283208	8.12828e-05	0.0612852	0.024899	4.06819	0.00467868	0.517741	0.00150579	0.0373644	2.11292e-05	0.000142838	0.000466463	0.00399882	0.00285335	0.466082	0.464887	0.000317859	0.0186799	0.000195176	2.86135e-06	1.11141e-06	0.00634528	0.00626615	1.20933e-05	0.000125889	0.000535579
C7	0.0296737	0.0587199	0.0151431	0.0117083	0.517589	0.00467868	3.96209	0.000914162	0.884535	0.000530085	0.00159925	0.00377295	0.003501	0.018616	0.017131	0.000416562	0.00100327	0.461872	2.38592e-05	0.0261922	0.000629702	0.000111065	1.64288e-05	4.58322e-05	0.000735438	0.000187018	0.000244897
C8	0.027276	6.64339e-05	2.4614e-05	0.0135297	0.00875413	0.517741	0.000914162	3.97462	0.000418737	0.915559	3.85394e-06	2.32985e-05	7.82402e-05	0.0130155	0.000460172	0.0178455	0.0192444	4.20757e-05	0.465889	4.93496e-05	7.25817e-07	3.35831e-07	0.0299361	0.0305349	2.53639e-06	1.31911e-05	0.000108786
C9	0.0115546	0.57305	0.0427806	0.00212922	0.0350612	0.00150579	0.884535	0.000418737	4.09162	0.000771767	0.00219852	0.00763131	0.00393066	0.0100898	0.00436608	5.84162e-05	0.000439746	0.0281094	1.21778e-05	0.467309	0.000398098	0.00035892	2.64929e-05	2.59569e-05	0.00191043	0.000163028	0.000166039
C10	0.0166919	0.000117665	5.53801e-05	0.00317846	0.00509526	0.0373644	0.000530085	0.915559	0.000771767	4.08203	7.64562e-06	3.7641e-05	7.37503e-05	0.0102759	0.000346701	0.00599066	0.0100082	2.74845e-05	0.0276889	3.9444e-05	1.28067e-06	5.48442e-07	0.483087	0.481741	3.86966e-06	5.03339e-06	7.29845e-05
C11	0.000292908	0.0380922	0.528961	5.38741e-05	0.000210281	2.11292e-05	0.00159925	3.85394e-06	0.00219852	7.64562e-06	4.011	0.516843	0.0369144	4.65293e-05	0.000258128	3.21244e-06	3.42473e-06	9.45879e-05	2.85452e-07	0.000334074	0.46277	0.464289	4.37212e-07	4.20739e-07	0.0196579	0.00651802	0.00609002
C12	0.00240266	0.0125054	0.0379911	0.000319566	0.00122499	0.000142838	0.00377295	2.32985e-05	0.00763131	3.7641e-05	0.516843	3.96255	0.911537	0.000133264	0.00161383	5.03041e-05	4.8315e-06	9.1322e-05	3.78852e-06	0.000243249	0.0193206	0.0185393	3.33082e-06	1.90976e-06	0.471216	0.0304502	0.029181
C13	0.0105197	0.00764792	0.0204201	0.00103073	0.0032629	0.000466463	0.003501	7.82402e-05	0.00393066	7.37503e-05	0.0369144	0.911537	4.07727	0.000270767	0.00415076	0.000205206	1.83705e-05	9.59287e-05	1.1796e-05	7.72473e-05	0.00986014	0.00653169	6.94001e-06	4.78562e-06	0.0284055	0.480877	0.477732
H14	0.0239399	0.00155285	0.000467623	0.00483658	0.450686	0.00399882	0.018616	0.0130155	0.0100898	0.0102759	4.65293e-05	0.000133264	0.000270767	0.364703	0.0136769	0.000223294	0.00028722	0.000590306	0.000462804	0.000632479	1.41198e-05	4.4788e-06	0.000260503	0.000483428	2.68121e-05	3.06575e-05	0.000122309
H15	0.0187614	0.0209109	0.00137754	0.00776672	0.456291	0.00285335	0.017131	0.000460172	0.00436608	0.000346701	0.000258128	0.00161383	0.00415076	0.0136769	0.379511	0.00260449	0.000219866	0.0044924	7.15914e-05	0.000312402	7.14563e-05	4.09062e-05	1.6349e-05	0.000154661	6.15943e-05	0.000939253	0.000136657
H16	0.020026	4.4057e-05	1.05967e-05	0.00844603	0.00378662	0.466082	0.000416562	0.0178455	5.84162e-05	0.00599066	3.21244e-06	5.03041e-05	0.000205206	0.000223294	0.00260449	0.4025	0.0149528	0.000114765	0.00502045	8.16516e-06	1.10273e-06	8.47338e-07	0.000446324	0.00388487	8.87773e-06	0.000188242	3.24441e-05
H17	0.0228083	6.13531e-05	1.68303e-05	0.0035697	0.00482184	0.464887	0.00100327	0.0192444	0.000439746	0.0100082	3.42473e-06	4.8315e-06	1.83705e-05	0.00028722	0.000219866	0.0149528	0.392657	2.76721e-05	0.00109221	5.3291e-05	9.5306e-07	2.12144e-07	0.000771887	0.00047579	8.81129e-07	8.05088e-06	1.77813e-05
H18	0.00380011	0.00878196	0.00145678	0.0119337	0.017766	0.000317859	0.461872	4.20757e-05	0.0281094	2.74845e-05	9.45879e-05	9.1322e-05	9.59287e-05	0.000590306	0.0044924	0.000114765	2.76721e-05	0.373839	7.15136e-06	0.00344705	3.53537e-05	7.59382e-06	1.24127e-06	7.8867e-06	2.29093e-05	2.2484e-05	9.42145e-06
H19	0.00206603	3.20515e-06	1.58948e-06	0.0108142	0.000221289	0.0186799	2.38592e-05	0.465889	1.21778e-05	0.0276889	2.85452e-07	3.78852e-06	1.1796e-05	0.000462804	7.15914e-05	0.00502045	0.00109221	7.15136e-06	0.382419	1.14322e-06	1.1307e-07	1.82806e-08	0.00352623	0.006492	2.02018e-07	9.92204e-06	7.53511e-06
H20	0.000642057	0.0290876	0.00880404	0.000146087	0.00552914	0.000195176	0.0261922	4.93496e-05	0.467309	3.9444e-05	0.000334074	0.000243249	7.72473e-05	0.000632479	0.000312402	8.16516e-06	5.3291e-05	0.00344705	1.14322e-06	0.379578	1.69914e-05	0.000167693	1.04576e-06	1.73741e-06	0.000191523	2.41149e-05	6.51446e-06
H21	6.18055e-05	0.00857118	0.0270502	1.50657e-05	6.20866e-05	2.86135e-06	0.000629702	7.25817e-07	0.000398098	1.28067e-06	0.46277	0.0193206	0.00986014	1.41198e-05	7.14563e-05	1.10273e-06	9.5306e-07	3.53537e-05	1.1307e-07	1.69914e-05	0.395525	0.0146705	7.88351e-08	9.66575e-08	0.0012441	0.000508122	0.000778826
H22	1.82309e-05	0.00502564	0.02971	4.61401e-06	2.348e-05	1.11141e-06	0.000111065	3.35831e-07	0.00035892	5.48442e-07	0.464289	0.0185393	0.00653169	4.4788e-06	4.09062e-05	8.47338e-07	2.12144e-07	7.59382e-06	1.82806e-08	0.000167693	0.0146705	0.397667	2.84485e-08	5.26967e-08	0.00521312	0.0045404	0.000475539
H23	0.00129973	4.6507e-06	2.31368e-06	0.000291772	0.000161848	0.00634528	1.64288e-05	0.0299361	2.64929e-05	0.483087	4.37212e-07	3.33082e-06	6.94001e-06	0.000260503	1.6349e-05	0.000446324	0.000771887	1.24127e-06	0.00352623	1.04576e-06	7.88351e-08	2.84485e-08	0.407044	0.0169249	2.78229e-07	2.66385e-07	8.78926e-06
H24	0.0007613	1.21044e-05	4.28825e-06	0.00048386	0.00033397	0.00626615	4.58322e-05	0.0305349	2.59569e-05	0.481741	4.20739e-07	1.90976e-06	4.78562e-06	0.000483428	0.000154661	0.00388487	0.00047579	7.8867e-06	0.006492	1.73741e-06	9.66575e-08	5.26967e-08	0.0169249	0.416397	1.79673e-07	1.49086e-06	4.13478e-06
H25	0.000131598	0.000594929	0.00661191	3.01416e-05	7.09029e-05	1.20933e-05	0.000735438	2.53639e-06	0.00191043	3.86966e-06	0.0196579	0.471216	0.0284055	2.68121e-05	6.15943e-05	8.87773e-06	8.81129e-07	2.29093e-05	2.02018e-07	0.000191523	0.0012441	0.00521312	2.78229e-07	1.79673e-07	0.406714	0.00677066	0.00352849
H26	0.000645585	0.00133369	0.00129717	0.000110472	0.000378812	0.000125889	0.000187018	1.31911e-05	0.000163028	5.03339e-06	0.00651802	0.0304502	0.480877	3.06575e-05	0.000939253	0.000188242	8.05088e-06	2.2484e-05	9.92204e-06	2.41149e-05	0.000508122	0.0045404	2.66385e-07	1.49086e-06	0.00677066	0.417731	0.0167274
H27	0.011892	0.000271133	0.00143537	0.00116258	0.00056335	0.000535579	0.000244897	0.000108786	0.000166039	7.29845e-05	0.00609002	0.029181	0.477732	0.000122309	0.000136657	3.24441e-05	1.77813e-05	9.42145e-06	7.53511e-06	6.51446e-06	0.000778826	0.000475539	8.78926e-06	4.13478e-06	0.00352849	0.0167274	0.396453
LDM — ajoene_z_35_LIDI_matrix
	S1	S2	S3	O4	C5	C6	C7	C8	C9	C10	C11	C12	C13	H14	H15	H16	H17	H18	H19	H20	H21	H22	H23	H24	H25	H26	H27
S1	12.9223	0.00283855	0.000537868	0.685632	0.462835	0.463941	0.028293	0.0295648	0.0147651	0.0188518	0.000191729	2.32038e-05	2.93285e-05	0.0183471	0.0225371	0.0242442	0.0222807	0.00292321	0.00122179	0.00091405	5.56271e-05	0.000370717	0.00098904	0.000912684	5.49612e-06	2.18714e-06	4.34678e-06		92.2872	31.7111
S2	0.00283855	14.5322	0.646477	0.00142306	0.0152414	0.000715791	0.0611694	0.00615861	0.575101	0.00061218	0.0370862	0.00937417	0.0052074	0.0169947	0.00155385	0.000564105	0.000184496	0.00884093	0.0167473	0.0284019	0.00699127	0.0031585	0.000274339	0.000126359	0.000361583	0.000476007	0.000243209
S3	0.000537868	0.646477	14.6291	0.000293121	0.00180398	0.000168036	0.0129629	0.00070017	0.0429994	0.000179523	0.525856	0.0423151	0.0209232	0.00144718	0.000335949	0.000258952	1.65953e-05	0.00137413	0.000986212	0.0122271	0.0285319	0.0287762	1.30541e-05	6.71555e-05	0.00540069	0.00109251	0.00125416
O4	0.685632	0.00142306	0.000293121	8.36699	0.0622993	0.0630553	0.0141426	0.0101487	0.00285767	0.00627824	5.10911e-05	8.75776e-06	6.05235e-06	0.00798204	0.0040512	0.00666582	0.00433269	0.0139869	0.000407928	0.000234851	2.42629e-05	9.2155e-05	0.000372716	0.000544168	2.12176e-06	5.64244e-07	1.92777e-06
C5	0.462835	0.0152414	0.00180398	0.0622993	4.07395	0.0231462	0.518922	0.00692104	0.0345233	0.0018229	0.000139224	3.60215e-05	2.71151e-05	0.457327	0.462751	0.00263962	0.00494815	0.0176128	0.00386719	0.00549307	3.4843e-05	6.87647e-05	0.000144713	6.36658e-05	3.24854e-06	2.02667e-06	1.55018e-06
C6	0.463941	0.000715791	0.000168036	0.0630553	0.0231462	4.07159	0.00912728	0.520106	0.00368503	0.0375799	0.000359835	4.3042e-05	1.30876e-05	0.00147924	0.00495196	0.456675	0.464636	0.000391838	0.0184475	0.000119078	0.000282357	0.00113248	0.00617077	0.00635796	1.34392e-05	1.54511e-06	5.94582e-06
C7	0.028293	0.0611694	0.0129629	0.0141426	0.518922	0.00912728	3.96174	0.00118701	0.880052	0.000385387	0.00168454	0.000391263	0.000453748	0.0170256	0.0195642	0.0105874	0.00088372	0.459629	0.00117813	0.0255746	0.000142831	0.000932149	5.37622e-05	3.15126e-05	4.72668e-05	3.70678e-05	2.1769e-05
C8	0.0295648	0.00615861	0.00070017	0.0101487	0.00692104	0.520106	0.00118701	3.98306	0.00104565	0.916959	0.00388629	0.000305483	0.000149769	0.00730826	0.000682714	0.0178256	0.0180236	0.000112061	0.458917	4.1083e-05	0.00416277	0.00283454	0.0299903	0.0300554	4.09236e-05	1.24131e-05	1.58093e-05
C9	0.0147651	0.575101	0.0429994	0.00285767	0.0345233	0.00368503	0.880052	0.00104565	4.10577	0.000156383	0.00331637	0.000603308	0.000212901	0.00363818	0.00994173	0.00585717	0.000282481	0.0279304	0.0019237	0.465244	0.000319081	0.00292435	5.93055e-05	3.00114e-05	0.000160425	1.77776e-05	2.93644e-05
C10	0.0188518	0.00061218	0.000179523	0.00627824	0.0018229	0.0375799	0.000385387	0.916959	0.000156383	4.08153	0.000934757	6.82827e-05	3.70294e-05	0.001955	0.000121848	0.00797133	0.00657956	6.73151e-05	0.0280454	1.07713e-05	0.00140517	0.000753431	0.480866	0.483277	7.12878e-06	4.09924e-06	4.12105e-06
C11	0.000191729	0.0370862	0.525856	5.10911e-05	0.000139224	0.000359835	0.00168454	0.00388629	0.00331637	0.000934757	4.00703	0.515122	0.0374762	0.000102211	4.26432e-05	0.000715684	3.61416e-05	9.5774e-05	0.00536397	0.000356943	0.460059	0.461348	6.97745e-05	0.000145029	0.0196551	0.00632436	0.00631847
C12	2.32038e-05	0.00937417	0.0423151	8.75776e-06	3.60215e-05	4.3042e-05	0.000391263	0.000305483	0.000603308	6.82827e-05	0.515122	3.97901	0.920913	2.65717e-05	1.14666e-05	8.70501e-05	3.16147e-06	2.58113e-05	0.000510262	4.77389e-05	0.0186181	0.0179101	7.04588e-06	1.23461e-05	0.473379	0.0300723	0.0302088
C13	2.93285e-05	0.0052074	0.0209232	6.05235e-06	2.71151e-05	1.30876e-05	0.000453748	0.000149769	0.000212901	3.70294e-05	0.0374762	0.920913	4.07769	1.35583e-05	1.51754e-05	1.82874e-05	4.41541e-06	2.11035e-05	0.000245193	2.25158e-05	0.00875063	0.00645284	4.3949e-06	1.29483e-05	0.0293338	0.48301	0.480507
H14	0.0183471	0.0169947	0.00144718	0.00798204	0.457327	0.00147924	0.0170256	0.00730826	0.00363818	0.001955	0.000102211	2.65717e-05	1.35583e-05	0.379852	0.0142793	0.000115722	0.000190284	0.00465667	0.00552949	0.000245516	4.19953e-05	1.1187e-05	0.000129733	7.23939e-05	8.82513e-07	8.55088e-07	5.73829e-07
H15	0.0225371	0.00155385	0.000335949	0.0040512	0.462751	0.00495196	0.0195642	0.000682714	0.00994173	0.000121848	4.26432e-05	1.14666e-05	1.51754e-05	0.0142793	0.386231	0.00019523	0.00092511	0.000875401	0.000351281	0.000708147	4.37101e-06	2.77042e-05	2.06407e-05	8.19717e-06	1.33375e-06	1.21659e-06	6.72446e-07
H16	0.0242442	0.000564105	0.000258952	0.00666582	0.00263962	0.456675	0.0105874	0.0178256	0.00585717	0.00797133	0.000715684	8.70501e-05	1.82874e-05	0.000115722	0.00019523	0.377846	0.0142292	0.000890162	0.00165874	0.00015416	6.76597e-05	0.00143012	0.000453739	0.000793239	4.40364e-05	2.0074e-06	1.67904e-05
H17	0.0222807	0.000184496	1.65953e-05	0.00433269	0.00494815	0.464636	0.00088372	0.0180236	0.000282481	0.00657956	3.61416e-05	3.16147e-06	4.41541e-06	0.000190284	0.00092511	0.0142292	0.393294	2.95335e-05	0.00447552	9.6796e-06	6.42236e-05	5.18011e-05	0.00354755	0.000457068	3.84493e-07	3.04074e-07	4.05767e-07
H18	0.00292321	0.00884093	0.00137413	0.0139869	0.0176128	0.000391838	0.459629	0.000112061	0.0279304	6.73151e-05	9.5774e-05	2.58113e-05	2.11035e-05	0.00465667	0.000875401	0.000890162	2.95335e-05	0.367879	6.41731e-05	0.00347835	8.13308e-06	3.87338e-05	3.55181e-06	4.74354e-06	5.29672e-06	1.68541e-06	1.33532e-06
H19	0.00122179	0.0167473	0.000986212	0.000407928	0.00386719	0.0184475	0.00117813	0.458917	0.0019237	0.0280454	0.00536397	0.000510262	0.000245193	0.00552949	0.000351281	0.00165874	0.00447552	6.41731e-05	0.387527	0.000108794	0.0055912	0.00187878	0.00626178	0.00356818	4.16769e-05	2.28787e-05	1.33183e-05
H20	0.00091405	0.0284019	0.0122271	0.000234851	0.00549307	0.000119078	0.0255746	4.1083e-05	0.465244	1.07713e-05	0.000356943	4.77389e-05	2.25158e-05	0.000245516	0.000708147	0.00015416	9.6796e-06	0.00347835	0.000108794	0.373756	0.000142258	0.000233287	2.52386e-06	2.62862e-06	1.21538e-05	1.2131e-06	5.93089e-06
H21	5.56271e-05	0.00699127	0.0285319	2.42629e-05	3.4843e-05	0.000282357	0.000142831	0.00416277	0.000319081	0.00140517	0.460059	0.0186181	0.00875063	4.19953e-05	4.37101e-06	6.76597e-05	6.42236e-05	8.13308e-06	0.0055912	0.000142258	0.389916	0.0148019	9.37891e-05	0.000284346	0.0016561	0.000783208	0.000523604
H22	0.000370717	0.0031585	0.0287762	9.2155e-05	6.87647e-05	0.00113248	0.000932149	0.00283454	0.00292435	0.000753431	0.461348	0.0179101	0.00645284	1.1187e-05	2.77042e-05	0.00143012	5.18011e-05	3.87338e-05	0.00187878	0.000233287	0.0148019	0.395916	4.88354e-05	3.59891e-05	0.00491861	0.000468444	0.00403238
H23	0.00098904	0.000274339	1.30541e-05	0.000372716	0.000144713	0.00617077	5.37622e-05	0.0299903	5.93055e-05	0.480866	6.97745e-05	7.04588e-06	4.3949e-06	0.000129733	2.06407e-05	0.000453739	0.00354755	3.55181e-06	0.00626178	2.52386e-06	9.37891e-05	4.88354e-05	0.410006	0.0167252	7.38631e-07	3.63593e-07	3.53372e-07
H24	0.000912684	0.000126359	6.71555e-05	0.000544168	6.36658e-05	0.00635796	3.15126e-05	0.0300554	3.00114e-05	0.483277	0.000145029	1.23461e-05	1.29483e-05	7.23939e-05	8.19717e-06	0.000793239	0.000457068	4.74354e-06	0.00356818	2.62862e-06	0.000284346	3.59891e-05	0.0167252	0.408039	1.02555e-06	1.21737e-06	6.13897e-07
H25	5.49612e-06	0.000361583	0.00540069	2.12176e-06	3.24854e-06	1.34392e-05	4.72668e-05	4.09236e-05	0.000160425	7.12878e-06	0.0196551	0.473379	0.0293338	8.82513e-07	1.33375e-06	4.40364e-05	3.84493e-07	5.29672e-06	4.16769e-05	1.21538e-05	0.0016561	0.00491861	7.38631e-07	1.02555e-06	0.408075	0.0036228	0.00673906
H26	2.18714e-06	0.000476007	0.00109251	5.64244e-07	2.02667e-06	1.54511e-06	3.70678e-05	1.24131e-05	1.77776e-05	4.09924e-06	0.00632436	0.0300723	0.48301	8.55088e-07	1.21659e-06	2.0074e-06	3.04074e-07	1.68541e-06	2.28787e-05	1.2131e-06	0.000783208	0.000468444	3.63593e-07	1.21737e-06	0.0036228	0.406872	0.0166642
H27	4.34678e-06	0.000243209	0.00125416	1.92777e-06	1.55018e-06	5.94582e-06	2.1769e-05	1.58093e-05	2.93644e-05	4.12105e-06	0.00631847	0.0302088	0.480507	5.73829e-07	6.72446e-07	1.67904e-05	4.05767e-07	1.33532e-06	1.33183e-05	5.93089e-06	0.000523604	0.00403238	3.53372e-07	6.13897e-07	0.00673906	0.0166642	0.410089
LDM — ajoene_z_36_LIDI_matrix
	S1	S2	S3	O4	C5	C6	C7	C8	C9	C10	C11	C12	C13	H14	H15	H16	H17	H18	H19	H20	H21	H22	H23	H24	H25	H26	H27
S1	12.9336	0.00282617	0.000551988	0.686419	0.462819	0.463093	0.0281079	0.0318031	0.0140135	0.0169995	0.000225449	1.90996e-05	3.58714e-05	0.0182477	0.0221254	0.021942	0.0228296	0.00317474	0.00311407	0.000903174	0.000524368	4.19179e-05	0.000873777	0.000731595	2.74048e-06	1.41796e-06	2.17553e-06		92.2814	31.7183
S2	0.00282617	14.5263	0.644657	0.00142853	0.0153987	0.000611225	0.0617619	0.000953965	0.57601	0.00766539	0.0368399	0.00924822	0.00518432	0.0163717	0.00161354	6.44763e-05	0.00144324	0.00872942	0.000303618	0.0284049	0.00640455	0.0030273	0.000505397	0.0186409	0.000461746	0.000239799	0.000483466
S3	0.000551988	0.644657	14.6289	0.00032655	0.00182463	0.000184485	0.0132726	9.12546e-05	0.0430313	0.000521005	0.525953	0.0430483	0.0210341	0.00137094	0.000347189	1.4312e-05	0.000529	0.00135312	1.58508e-05	0.0125866	0.0277193	0.0291767	2.15952e-05	0.00107107	0.00594723	0.00126638	0.00109027
O4	0.686419	0.00142853	0.00032655	8.36178	0.0618211	0.0625524	0.017627	0.00936816	0.00287309	0.00596591	4.74675e-05	7.73084e-06	6.56886e-06	0.00755305	0.00312125	0.00729313	0.00359886	0.0171118	0.000527156	0.000263456	9.67617e-05	1.93908e-05	0.000566614	0.000294214	1.2256e-06	3.57563e-07	4.54401e-07
C5	0.462819	0.0153987	0.00182463	0.0618211	4.07596	0.0243825	0.518298	0.00511203	0.0346653	0.00485063	0.000149788	3.41611e-05	3.19195e-05	0.454843	0.464184	0.00399845	0.00509224	0.0174271	0.00028924	0.00549539	0.000127784	1.64796e-05	0.00012395	0.00107619	3.6683e-06	1.35825e-06	1.9767e-06
C6	0.463093	0.000611225	0.000184485	0.0625524	0.0243825	4.07392	0.00733157	0.520338	0.00343113	0.036882	0.000529117	4.89954e-05	3.62567e-05	0.00292338	0.00493842	0.463841	0.455485	0.000196223	0.0198068	0.000106704	0.00216593	6.16421e-05	0.00635009	0.00539613	2.31873e-06	1.87887e-06	5.23482e-06
C7	0.0281079	0.0617619	0.0132726	0.017627	0.518298	0.00733157	3.96217	0.000692475	0.879858	0.000435973	0.00177695	0.000351585	0.000532783	0.0166999	0.0197954	0.000516726	0.0110909	0.457408	0.000199183	0.0255263	0.00146663	0.000119349	1.84997e-05	0.00039784	1.73625e-05	1.98128e-05	3.10617e-05
C8	0.0318031	0.000953965	9.12546e-05	0.00936816	0.00511203	0.520338	0.000692475	3.98184	0.000330835	0.916116	0.000449829	4.12244e-05	1.21249e-05	0.00622751	0.000539915	0.0185259	0.0174925	9.62577e-05	0.47427	1.65674e-05	0.00047611	0.000755514	0.0300449	0.028545	8.40522e-06	2.72353e-06	1.80171e-06
C9	0.0140135	0.57601	0.0430313	0.00287309	0.0346653	0.00343113	0.879858	0.000330835	4.10722	0.000379988	0.00375677	0.000531933	0.000271433	0.00367653	0.0101066	0.000246303	0.00717135	0.0275442	0.000172323	0.465102	0.00436209	0.00037207	2.88917e-05	0.000755783	7.17893e-05	2.09198e-05	3.00382e-05
C10	0.0169995	0.00766539	0.000521005	0.00596591	0.00485063	0.036882	0.000435973	0.916116	0.000379988	4.08661	0.00257025	0.000225234	8.17347e-05	0.00891112	0.000464417	0.00808652	0.00551943	0.000127027	0.0296596	6.43045e-05	0.00144469	0.00338818	0.483332	0.466855	4.93299e-05	1.2988e-05	6.46596e-06
C11	0.000225449	0.0368399	0.525953	4.74675e-05	0.000149788	0.000529117	0.00177695	0.000449829	0.00375677	0.00257025	4.0083	0.515224	0.0376151	9.38468e-05	4.98525e-05	3.42483e-05	0.00214182	9.69009e-05	9.69196e-05	0.000376217	0.458461	0.462408	0.000134133	0.0056127	0.0196186	0.00632829	0.00632455
C12	1.90996e-05	0.00924822	0.0430483	7.73084e-06	3.41611e-05	4.89954e-05	0.000351585	4.12244e-05	0.000531933	0.000225234	0.515224	3.9787	0.920468	2.30288e-05	1.12534e-05	3.20577e-06	0.000169732	2.37374e-05	1.24621e-05	5.48766e-05	0.0185959	0.0179565	1.14309e-05	0.000571778	0.473123	0.0301919	0.0300413
C13	3.58714e-05	0.00518432	0.0210341	6.56886e-06	3.19195e-05	3.62567e-05	0.000532783	1.21249e-05	0.000271433	8.17347e-05	0.0376151	0.920468	4.07868	1.50492e-05	2.11328e-05	3.51043e-06	0.000152569	2.30698e-05	4.48932e-06	1.71574e-05	0.00880579	0.00644014	6.87725e-06	0.000150584	0.029188	0.480585	0.483022
H14	0.0182477	0.0163717	0.00137094	0.00755305	0.454843	0.00292338	0.0166999	0.00622751	0.00367653	0.00891112	9.38468e-05	2.30288e-05	1.50492e-05	0.371764	0.0142184	0.000343538	0.000491106	0.00447898	0.000141917	0.000243921	2.1643e-05	1.93683e-05	0.000249293	0.00251712	2.93993e-06	8.06022e-07	8.31576e-07
H15	0.0221254	0.00161354	0.000347189	0.00312125	0.464184	0.00493842	0.0197954	0.000539915	0.0101066	0.000464417	4.98525e-05	1.12534e-05	2.11328e-05	0.0142184	0.38928	0.00096313	0.000420708	0.000796867	1.66579e-05	0.000699491	5.14717e-05	2.89587e-06	1.6698e-05	0.000141901	5.25948e-07	7.66548e-07	1.1093e-06
H16	0.021942	6.44763e-05	1.4312e-05	0.00729313	0.00399845	0.463841	0.000516726	0.0185259	0.000246303	0.00808652	3.42483e-05	3.20577e-06	3.51043e-06	0.000343538	0.00096313	0.386113	0.0141685	1.69847e-05	0.00202615	6.12762e-06	0.000119915	1.29138e-05	0.000790918	0.000441982	1.255e-07	2.42388e-07	3.73764e-07
H17	0.0228296	0.00144324	0.000529	0.00359886	0.00509224	0.455485	0.0110909	0.0174925	0.00717135	0.00551943	0.00214182	0.000169732	0.000152569	0.000491106	0.000420708	0.0141685	0.380462	0.000352034	0.00447138	0.000151872	0.00455714	0.000104836	0.000357847	0.00249882	7.04643e-06	6.40102e-06	1.6357e-05
H18	0.00317474	0.00872942	0.00135312	0.0171118	0.0174271	0.000196223	0.457408	9.62577e-05	0.0275442	0.000127027	9.69009e-05	2.37374e-05	2.30698e-05	0.00447898	0.000796867	1.69847e-05	0.000352034	0.361982	7.69966e-06	0.00345842	4.95101e-05	7.89637e-06	3.98708e-06	2.9794e-05	2.35511e-06	1.04521e-06	1.26663e-06
H19	0.00311407	0.000303618	1.58508e-05	0.000527156	0.00028924	0.0198068	0.000199183	0.47427	0.000172323	0.0296596	9.69196e-05	1.24621e-05	4.48932e-06	0.000141917	1.66579e-05	0.00202615	0.00447138	7.69966e-06	0.410448	7.01573e-06	9.80037e-05	0.000110684	0.00374731	0.00627385	1.71259e-06	4.63323e-07	5.44683e-07
H20	0.000903174	0.0284049	0.0125866	0.000263456	0.00549539	0.000106704	0.0255263	1.65674e-05	0.465102	6.43045e-05	0.000376217	5.48766e-05	1.71574e-05	0.000243921	0.000699491	6.12762e-06	0.000151872	0.00345842	7.01573e-06	0.373973	0.000253425	0.000135705	3.6452e-06	0.000135951	2.92741e-05	3.74399e-06	1.44708e-06
H21	0.000524368	0.00640455	0.0277193	9.67617e-05	0.000127784	0.00216593	0.00146663	0.00047611	0.00436209	0.00144469	0.458461	0.0185959	0.00880579	2.1643e-05	5.14717e-05	0.000119915	0.00455714	4.95101e-05	9.80037e-05	0.000253425	0.389794	0.0148174	0.000119031	0.00232571	0.00167087	0.00052737	0.000779997
H22	4.19179e-05	0.0030273	0.0291767	1.93908e-05	1.64796e-05	6.16421e-05	0.000119349	0.000755514	0.00037207	0.00338818	0.462408	0.0179565	0.00644014	1.93683e-05	2.89587e-06	1.29138e-05	0.000104836	7.89637e-06	0.000110684	0.000135705	0.0148174	0.395654	0.000124049	0.00506601	0.00492508	0.00401769	0.000462816
H23	0.000873777	0.000505397	2.15952e-05	0.000566614	0.00012395	0.00635009	1.84997e-05	0.0300449	2.88917e-05	0.483332	0.000134133	1.14309e-05	6.87725e-06	0.000249293	1.6698e-05	0.000790918	0.000357847	3.98708e-06	0.00374731	3.6452e-06	0.000119031	0.000124049	0.407782	0.0157712	1.79673e-06	8.22625e-07	4.9633e-07
H24	0.000731595	0.0186409	0.00107107	0.000294214	0.00107619	0.00539613	0.00039784	0.028545	0.000755783	0.466855	0.0056127	0.000571778	0.000150584	0.00251712	0.000141901	0.000441982	0.00249882	2.9794e-05	0.00627385	0.000135951	0.00232571	0.00506601	0.0157712	0.385895	0.000111704	1.89101e-05	1.36813e-05
H25	2.74048e-06	0.000461746	0.00594723	1.2256e-06	3.6683e-06	2.31873e-06	1.73625e-05	8.40522e-06	7.17893e-05	4.93299e-05	0.0196186	0.473123	0.029188	2.93993e-06	5.25948e-07	1.255e-07	7.04643e-06	2.35511e-06	1.71259e-06	2.92741e-05	0.00167087	0.00492508	1.79673e-06	0.000111704	0.40755	0.00673163	0.00361377
H26	1.41796e-06	0.000239799	0.00126638	3.57563e-07	1.35825e-06	1.87887e-06	1.98128e-05	2.72353e-06	2.09198e-05	1.2988e-05	0.00632829	0.0301919	0.480585	8.06022e-07	7.66548e-07	2.42388e-07	6.40102e-06	1.04521e-06	4.63323e-07	3.74399e-06	0.00052737	0.00401769	8.22625e-07	1.89101e-05	0.00673163	0.409932	0.0166566
H27	2.17553e-06	0.000483466	0.00109027	4.54401e-07	1.9767e-06	5.23482e-06	3.10617e-05	1.80171e-06	3.00382e-05	6.46596e-06	0.00632455	0.0300413	0.483022	8.31576e-07	1.1093e-06	3.73764e-07	1.6357e-05	1.26663e-06	5.44683e-07	1.44708e-06	0.000779997	0.000462816	4.9633e-07	1.36813e-05	0.00361377	0.0166566	0.406768
LDM — ajoene_z_37_LIDI_matrix
	S1	S2	S3	O4	C5	C6	C7	C8	C9	C10	C11	C12	C13	H14	H15	H16	H17	H18	H19	H20	H21	H22	H23	H24	H25	H26	H27
S1	12.9158	0.00315236	0.00118199	0.685477	0.460589	0.467418	0.0279434	0.0318128	0.0173408	0.0166325	0.000106542	0.000134512	0.000337191	0.018491	0.0225428	0.0245125	0.0198886	0.00146151	0.00209816	0.00120699	2.60575e-05	9.60276e-05	0.000733894	0.000976186	1.06994e-05	1.21832e-05	0.000564207		92.2879	31.7128
S2	0.00315236	14.5226	0.641155	0.00127688	0.0172738	0.00590302	0.0559049	0.000617138	0.573274	0.00018495	0.0374602	0.0163781	0.0109597	0.0207459	0.00175826	0.00425556	0.00650788	0.00880632	0.000124947	0.0292162	0.00879573	0.00344214	2.819e-05	1.80621e-05	0.000629192	0.000321146	0.000692826
S3	0.00118199	0.641155	14.6371	0.000308204	0.00186515	0.000585452	0.0180355	9.76958e-05	0.0443523	2.87134e-05	0.528834	0.0395499	0.0215848	0.001326	0.000430717	0.000437329	0.00085666	0.00153201	2.223e-05	0.00813502	0.0268428	0.0291268	6.009e-06	4.06761e-06	0.00694826	0.00154444	0.00130265
O4	0.685477	0.00127688	0.000308204	8.37058	0.0627004	0.0623869	0.0137491	0.0100608	0.00345979	0.00287998	3.21306e-05	0.000101084	0.000254589	0.00771772	0.00374258	0.00587446	0.00846536	0.0075145	0.00693966	0.00022773	6.92425e-06	2.43838e-05	0.000419101	0.00020859	8.12734e-06	8.83742e-06	0.000321817
C5	0.460589	0.0172738	0.00186515	0.0627004	4.07623	0.0244158	0.519791	0.0049483	0.0337808	0.00207179	0.000262173	0.000800202	0.00366968	0.45313	0.464501	0.00322849	0.00322144	0.0179246	0.000215237	0.00538158	4.08576e-05	0.000242447	0.000110462	0.000241033	8.70648e-05	0.000129899	0.00458281
C6	0.467418	0.00590302	0.000585452	0.0623869	0.0244158	4.07351	0.00783519	0.517296	0.00521451	0.0382288	4.46992e-05	1.39712e-05	3.02547e-05	0.00328148	0.00472221	0.453177	0.463349	0.00017731	0.0190247	0.000118086	2.19641e-05	2.80179e-05	0.00636784	0.00641879	1.79062e-06	1.96902e-06	7.80936e-05
C7	0.0279434	0.0559049	0.0180355	0.0137491	0.519791	0.00783519	3.95288	0.000929402	0.873363	0.000361766	0.00226775	0.00033475	0.000639397	0.0168704	0.0199259	0.00995063	0.00041318	0.464815	2.97487e-05	0.0258997	0.00038017	0.00341556	2.21992e-05	5.61776e-05	9.82297e-05	4.73015e-05	0.000809425
C8	0.0318128	0.000617138	9.76958e-05	0.0100608	0.0049483	0.517296	0.000929402	3.98058	0.000528293	0.923342	5.94472e-06	1.69599e-06	5.63155e-06	0.000339336	0.00097912	0.0180831	0.0176281	2.38558e-05	0.469279	1.43599e-05	3.30253e-06	4.06866e-06	0.0307143	0.0302602	4.19067e-07	3.06987e-07	2.49995e-05
C9	0.0173408	0.573274	0.0443523	0.00345979	0.0337808	0.00521451	0.873363	0.000528293	4.09805	0.000789711	0.00502105	0.000740872	0.000445165	0.00393316	0.0081585	0.00989996	0.000410681	0.0282005	1.32202e-05	0.467349	0.000560309	0.00574679	2.96619e-05	4.60574e-05	0.000164893	2.44992e-05	0.000370279
C10	0.0166325	0.00018495	2.87134e-05	0.00287998	0.00207179	0.0382288	0.000361766	0.923342	0.000789711	4.08115	4.10357e-06	1.67216e-06	3.67431e-06	6.33104e-05	0.000558356	0.00917753	0.00629429	9.11262e-06	0.028323	2.42345e-05	5.46306e-07	6.37774e-06	0.481862	0.483497	2.75554e-07	3.29398e-07	1.31712e-05
C11	0.000106542	0.0374602	0.528834	3.21306e-05	0.000262173	4.46992e-05	0.00226775	5.94472e-06	0.00502105	4.10357e-06	4.01344	0.516901	0.0368717	0.000283286	8.43517e-05	8.40923e-05	4.00741e-05	0.000106355	6.94621e-07	0.000301954	0.463097	0.460974	3.86885e-07	4.29469e-07	0.0196843	0.00625828	0.00633638
C12	0.000134512	0.0163781	0.0395499	0.000101084	0.000800202	1.39712e-05	0.00033475	1.69599e-06	0.000740872	1.67216e-06	0.516901	3.96305	0.915066	0.00224631	0.000143436	7.91797e-06	1.77992e-05	2.63157e-05	4.99961e-07	0.000206319	0.0191834	0.0182714	2.06798e-07	1.63888e-07	0.472471	0.0300544	0.0299446
C13	0.000337191	0.0109597	0.0215848	0.000254589	0.00366968	3.02547e-05	0.000639397	5.63155e-06	0.000445165	3.67431e-06	0.0368717	0.915066	4.07938	0.00638485	0.000978988	1.07517e-05	2.35091e-05	7.2523e-05	8.61194e-07	0.000109198	0.00946276	0.00633398	3.32223e-07	5.50865e-07	0.028784	0.483511	0.477335
H14	0.018491	0.0207459	0.001326	0.00771772	0.45313	0.00328148	0.0168704	0.000339336	0.00393316	6.33104e-05	0.000283286	0.00224631	0.00638485	0.369318	0.0138531	0.000155348	0.0026431	0.00452814	9.79616e-05	0.00028899	8.20268e-05	4.6057e-05	1.15191e-05	6.67028e-06	8.34377e-05	0.000233357	0.00302594
H15	0.0225428	0.00175826	0.000430717	0.00374258	0.464501	0.00472221	0.0199259	0.00097912	0.0081585	0.000558356	8.43517e-05	0.000143436	0.000978988	0.0138531	0.394668	0.000202237	0.000250285	0.00168322	1.78904e-05	0.000527742	1.05221e-05	5.93936e-05	2.65256e-05	6.36777e-05	6.57136e-05	6.95923e-05	0.00206409
H16	0.0245125	0.00425556	0.000437329	0.00587446	0.00322849	0.453177	0.00995063	0.0180831	0.00989996	0.00917753	8.40923e-05	7.91797e-06	1.07517e-05	0.000155348	0.000202237	0.372634	0.0141228	0.000261234	0.00122476	0.000196699	3.0261e-05	3.50404e-05	0.000460883	0.000719322	9.37573e-07	4.66677e-07	1.04127e-05
H17	0.0198886	0.00650788	0.00085666	0.00846536	0.00322144	0.463349	0.00041318	0.0176281	0.000410681	0.00629429	4.00741e-05	1.77992e-05	2.35091e-05	0.0026431	0.000250285	0.0141228	0.398012	5.40683e-05	0.00494392	5.71722e-05	2.15292e-05	2.12994e-06	0.00401884	0.000462033	6.71065e-07	1.61374e-06	6.1495e-06
H18	0.00146151	0.00880632	0.00153201	0.0075145	0.0179246	0.00017731	0.464815	2.38558e-05	0.0282005	9.11262e-06	0.000106355	2.63157e-05	7.2523e-05	0.00452814	0.00168322	0.000261234	5.40683e-05	0.379155	3.33683e-06	0.00339313	1.75242e-05	9.21485e-05	8.4831e-07	1.38776e-06	4.28872e-06	2.29602e-06	2.74001e-05
H19	0.00209816	0.000124947	2.223e-05	0.00693966	0.000215237	0.0190247	2.97487e-05	0.469279	1.32202e-05	0.028323	6.94621e-07	4.99961e-07	8.61194e-07	9.79616e-05	1.78904e-05	0.00122476	0.00494392	3.33683e-06	0.392155	5.13224e-07	4.95915e-07	1.34247e-07	0.00660036	0.00358577	3.20692e-08	5.53928e-08	9.59006e-07
H20	0.00120699	0.0292162	0.00813502	0.00022773	0.00538158	0.000118086	0.0258997	1.43599e-05	0.467349	2.42345e-05	0.000301954	0.000206319	0.000109198	0.00028899	0.000527742	0.000196699	5.71722e-05	0.00339313	5.13224e-07	0.378172	1.79319e-05	0.000200487	1.0889e-06	1.01831e-06	1.72879e-05	5.38902e-06	1.18334e-05
H21	2.60575e-05	0.00879573	0.0268428	6.92425e-06	4.08576e-05	2.19641e-05	0.00038017	3.30253e-06	0.000560309	5.46306e-07	0.463097	0.0191834	0.00946276	8.20268e-05	1.05221e-05	3.0261e-05	2.15292e-05	1.75242e-05	4.95915e-07	1.79319e-05	0.39415	0.0144993	1.65812e-07	1.51362e-07	0.00130311	0.000779034	0.00049531
H22	9.60276e-05	0.00344214	0.0291268	2.43838e-05	0.000242447	2.80179e-05	0.00341556	4.06866e-06	0.00574679	6.37774e-06	0.460974	0.0182714	0.00633398	4.6057e-05	5.93936e-05	3.50404e-05	2.12994e-06	9.21485e-05	1.34247e-07	0.000200487	0.0144993	0.392016	2.64976e-07	4.73598e-07	0.00510249	0.000462895	0.0043015
H23	0.000733894	2.819e-05	6.009e-06	0.000419101	0.000110462	0.00636784	2.21992e-05	0.0307143	2.96619e-05	0.481862	3.86885e-07	2.06798e-07	3.32223e-07	1.15191e-05	2.65256e-05	0.000460883	0.00401884	8.4831e-07	0.00660036	1.0889e-06	1.65812e-07	2.64976e-07	0.416066	0.0169288	1.99137e-08	2.14422e-08	6.96538e-07
H24	0.000976186	1.80621e-05	4.06761e-06	0.00020859	0.000241033	0.00641879	5.61776e-05	0.0302602	4.60574e-05	0.483497	4.29469e-07	1.63888e-07	5.50865e-07	6.67028e-06	6.36777e-05	0.000719322	0.000462033	1.38776e-06	0.00358577	1.01831e-06	1.51362e-07	4.73598e-07	0.0169288	0.408907	4.49483e-08	3.55984e-08	2.0037e-06
H25	1.06994e-05	0.000629192	0.00694826	8.12734e-06	8.70648e-05	1.79062e-06	9.82297e-05	4.19067e-07	0.000164893	2.75554e-07	0.0196843	0.472471	0.028784	8.34377e-05	6.57136e-05	9.37573e-07	6.71065e-07	4.28872e-06	3.20692e-08	1.72879e-05	0.00130311	0.00510249	1.99137e-08	4.49483e-08	0.408325	0.00359291	0.00663408
H26	1.21832e-05	0.000321146	0.00154444	8.83742e-06	0.000129899	1.96902e-06	4.73015e-05	3.06987e-07	2.44992e-05	3.29398e-07	0.00625828	0.0300544	0.483511	0.000233357	6.95923e-05	4.66677e-07	1.61374e-06	2.29602e-06	5.53928e-08	5.38902e-06	0.000779034	0.000462895	2.14422e-08	3.55984e-08	0.00359291	0.409108	0.01677
H27	0.000564207	0.000692826	0.00130265	0.000321817	0.00458281	7.80936e-05	0.000809425	2.49995e-05	0.000370279	1.31712e-05	0.00633638	0.0299446	0.477335	0.00302594	0.00206409	1.04127e-05	6.1495e-06	2.74001e-05	9.59006e-07	1.18334e-05	0.00049531	0.0043015	6.96538e-07	2.0037e-06	0.00663408	0.01677	0.410903
LDM — ajoene_z_38_LIDI_matrix
	S1	S2	S3	O4	C5	C6	C7	C8	C9	C10	C11	C12	C13	H14	H15	H16	H17	H18	H19	H20	H21	H22	H23	H24	H25	H26	H27
S1	12.9349	0.00258389	0.000412597	0.685191	0.466346	0.46449	0.0278232	0.0293139	0.0115242	0.0160836	8.35377e-05	2.39378e-05	2.43925e-05	0.0184245	0.0226182	0.0222629	0.0235252	0.00415491	0.00315574	0.000950575	7.82616e-05	6.46251e-06	0.000768637	0.000886809	2.84146e-05	1.80703e-06	1.71947e-06		92.2688	31.7303
S2	0.00258389	14.5174	0.648759	0.00160866	0.0160485	0.00054132	0.0642301	0.00112659	0.576301	0.0053795	0.0377793	0.00731328	0.00159031	0.0160222	0.00204253	6.73535e-05	0.000748246	0.00875905	0.000146596	0.0277885	0.0061426	0.00846354	0.00867203	0.00023062	0.0094504	0.00042681	0.000205037
S3	0.000412597	0.648759	14.6249	0.000380016	0.00190031	8.5821e-05	0.0114281	6.40144e-05	0.0423263	0.000325573	0.530001	0.0421874	0.0199085	0.00140829	0.000281948	7.19996e-06	0.000140585	0.00136741	1.34112e-05	0.013665	0.0294599	0.0255139	0.000746984	3.00034e-05	0.00462247	0.000932416	0.0015115
O4	0.685191	0.00160866	0.000380016	8.36208	0.0615244	0.0628683	0.0159991	0.0095608	0.00252757	0.00577419	2.72401e-05	1.34379e-05	6.64103e-06	0.00777255	0.00344954	0.00639157	0.00445977	0.0187684	0.000599579	0.000285768	2.42782e-05	3.71948e-06	0.000297166	0.000569351	2.07684e-05	6.90487e-07	5.23078e-07
C5	0.466346	0.0160485	0.00190031	0.0615244	4.07915	0.0237922	0.516924	0.00609024	0.0350515	0.00519733	0.000132791	2.6902e-05	1.60194e-05	0.454468	0.462707	0.00440847	0.00404599	0.017295	0.00027269	0.0055242	6.67551e-05	2.97466e-05	0.000719347	0.000127905	3.08075e-05	2.2294e-06	1.6067e-06
C6	0.46449	0.00054132	8.5821e-05	0.0628683	0.0237922	4.07241	0.00825204	0.520445	0.00285515	0.037168	4.59103e-05	3.55116e-05	7.90161e-06	0.00217071	0.00503782	0.463787	0.456835	0.000552691	0.0196959	0.000107189	0.000131882	8.66292e-06	0.00590474	0.00628263	5.67221e-05	5.65732e-07	1.4958e-06
C7	0.0278232	0.0642301	0.0114281	0.0159991	0.516924	0.00825204	3.96771	0.000679283	0.881875	0.000808462	0.00182898	0.000234903	0.00024751	0.0168559	0.0195407	0.000645821	0.0120301	0.455909	0.000192888	0.0253665	0.00095615	0.000313803	0.00114732	6.29273e-05	0.000244332	2.55304e-05	1.90611e-05
C8	0.0293139	0.00112659	6.40144e-05	0.0095608	0.00609024	0.520445	0.000679283	3.98115	0.000298542	0.915094	0.000153213	0.000554002	0.000109351	0.0077332	0.000702449	0.0186432	0.0175443	0.000119567	0.474371	1.40019e-05	0.000345827	1.16038e-05	0.0286884	0.0296359	0.000666603	1.04614e-05	5.62763e-06
C9	0.0115242	0.576301	0.0423263	0.00252757	0.0350515	0.00285515	0.881875	0.000298542	4.11103	0.000898057	0.00314823	0.000574611	0.000274125	0.00441582	0.0108467	0.000202851	0.00522326	0.0275034	0.000155441	0.464784	0.00327584	0.000327632	0.00195732	9.32403e-05	0.000334734	2.8601e-05	3.0124e-05
C10	0.0160836	0.0053795	0.000325573	0.00577419	0.00519733	0.037168	0.000808462	0.915094	0.000898057	4.07488	0.00149595	0.00408777	0.00082377	0.00915556	0.000447933	0.00855085	0.00604127	9.84892e-05	0.0295817	3.90586e-05	0.00287947	0.000120288	0.468015	0.481643	0.00461137	8.08887e-05	4.56502e-05
C11	8.35377e-05	0.0377793	0.530001	2.72401e-05	0.000132791	4.59103e-05	0.00182898	0.000153213	0.00314823	0.00149595	4.01296	0.514832	0.036989	9.67094e-05	6.32955e-05	4.00955e-06	0.000112322	0.000101742	7.35868e-05	0.000371244	0.459294	0.463403	0.00425809	0.000167574	0.0190397	0.00631836	0.00630935
C12	2.39378e-05	0.00731328	0.0421874	1.34379e-05	2.6902e-05	3.55116e-05	0.000234903	0.000554002	0.000574611	0.00408777	0.514832	3.97109	0.922721	2.5227e-05	9.01555e-06	1.06496e-05	2.45438e-05	1.69307e-05	8.77445e-05	0.00017073	0.0187919	0.0180953	0.0052792	0.00125413	0.466243	0.0305662	0.0303914
C13	2.43925e-05	0.00159031	0.0199085	6.64103e-06	1.60194e-05	7.90161e-06	0.00024751	0.000109351	0.000274125	0.00082377	0.036989	0.922721	4.08125	1.20652e-05	7.37346e-06	3.72452e-06	1.76348e-05	1.14177e-05	1.44173e-05	8.89607e-05	0.00979687	0.00651146	0.00109365	0.000424921	0.0285772	0.481509	0.483565
H14	0.0184245	0.0160222	0.00140829	0.00777255	0.454468	0.00217071	0.0168559	0.0077332	0.00441582	0.00915556	9.67094e-05	2.5227e-05	1.20652e-05	0.37123	0.014202	0.000263958	0.00017449	0.0041328	0.000166388	0.00027389	2.10202e-05	1.65734e-05	0.0012769	0.000221683	4.11783e-05	1.56893e-06	1.44078e-06
H15	0.0226182	0.00204253	0.000281948	0.00344954	0.462707	0.00503782	0.0195407	0.000702449	0.0108467	0.000447933	6.32955e-05	9.01555e-06	7.37346e-06	0.014202	0.38656	0.000985184	0.000325234	0.000533638	1.67704e-05	0.000661975	3.83994e-05	1.30368e-05	9.45124e-05	9.76515e-06	1.26729e-05	9.80128e-07	6.11254e-07
H16	0.0222629	6.73535e-05	7.19996e-06	0.00639157	0.00440847	0.463787	0.000645821	0.0186432	0.000202851	0.00855085	4.00955e-06	1.06496e-05	3.72452e-06	0.000263958	0.000985184	0.38783	0.0141921	3.31314e-05	0.00180321	7.55985e-06	1.38993e-05	5.35037e-07	0.000481946	0.000804773	5.56575e-06	1.45645e-07	2.61477e-07
H17	0.0235252	0.000748246	0.000140585	0.00445977	0.00404599	0.456835	0.0120301	0.0175443	0.00522326	0.00604127	0.000112322	2.45438e-05	1.76348e-05	0.00017449	0.000325234	0.0141921	0.380639	0.00120697	0.0046437	0.000136842	0.000246472	1.38784e-05	0.0033294	0.000410495	1.09204e-05	8.98803e-07	1.45295e-06
H18	0.00415491	0.00875905	0.00136741	0.0187684	0.017295	0.000552691	0.455909	0.000119567	0.0275034	9.84892e-05	0.000101742	1.69307e-05	1.14177e-05	0.0041328	0.000533638	3.31314e-05	0.00120697	0.359329	2.69939e-05	0.00341092	4.15442e-05	1.66446e-05	2.78508e-05	3.26525e-06	1.39857e-05	1.3884e-06	1.10113e-06
H19	0.00315574	0.000146596	1.34112e-05	0.000599579	0.00027269	0.0196959	0.000192888	0.474371	0.000155441	0.0295817	7.35868e-05	8.77445e-05	1.44173e-05	0.000166388	1.67704e-05	0.00180321	0.0046437	2.69939e-05	0.409924	5.26308e-06	0.000154208	5.96327e-06	0.00630944	0.00363257	7.59703e-05	1.98055e-06	1.05569e-06
H20	0.000950575	0.0277885	0.013665	0.000285768	0.0055242	0.000107189	0.0253665	1.40019e-05	0.464784	3.90586e-05	0.000371244	0.00017073	8.89607e-05	0.00027389	0.000661975	7.55985e-06	0.000136842	0.00341092	5.26308e-06	0.372472	0.000286759	3.63048e-05	4.53947e-05	2.4869e-06	9.7328e-05	6.03593e-06	7.83541e-06
H21	7.82616e-05	0.0061426	0.0294599	2.42782e-05	6.67551e-05	0.000131882	0.00095615	0.000345827	0.00327584	0.00287947	0.459294	0.0187919	0.00979687	2.10202e-05	3.83994e-05	1.38993e-05	0.000246472	4.15442e-05	0.000154208	0.000286759	0.390476	0.0144244	0.0059524	0.000218689	0.000847704	0.00043319	0.00074873
H22	6.46251e-06	0.00846354	0.0255139	3.71948e-06	2.97466e-05	8.66292e-06	0.000313803	1.16038e-05	0.000327632	0.000120288	0.463403	0.0180953	0.00651146	1.65734e-05	1.30368e-05	5.35037e-07	1.38784e-05	1.66446e-05	5.96327e-06	3.63048e-05	0.0144244	0.395645	0.000286288	4.34115e-05	0.00505978	0.00424062	0.000487326
H23	0.000768637	0.00867203	0.000746984	0.000297166	0.000719347	0.00590474	0.00114732	0.0286884	0.00195732	0.468015	0.00425809	0.0052792	0.00109365	0.0012769	9.45124e-05	0.000481946	0.0033294	2.78508e-05	0.00630944	4.53947e-05	0.0059524	0.000286288	0.393717	0.0161231	0.004075	9.99158e-05	4.31401e-05
H24	0.000886809	0.00023062	3.00034e-05	0.000569351	0.000127905	0.00628263	6.29273e-05	0.0296359	9.32403e-05	0.481643	0.000167574	0.00125413	0.000424921	0.000221683	9.76515e-06	0.000804773	0.000410495	3.26525e-06	0.00363257	2.4869e-06	0.000218689	4.34115e-05	0.0161231	0.405425	0.00155311	3.05541e-05	3.46863e-05
H25	2.84146e-05	0.0094504	0.00462247	2.07684e-05	3.08075e-05	5.67221e-05	0.000244332	0.000666603	0.000334734	0.00461137	0.0190397	0.466243	0.0285772	4.11783e-05	1.26729e-05	5.56575e-06	1.09204e-05	1.39857e-05	7.59703e-05	9.7328e-05	0.000847704	0.00505978	0.004075	0.00155311	0.400302	0.00652066	0.00361026
H26	1.80703e-06	0.00042681	0.000932416	6.90487e-07	2.2294e-06	5.65732e-07	2.55304e-05	1.04614e-05	2.8601e-05	8.08887e-05	0.00631836	0.0305662	0.481509	1.56893e-06	9.80128e-07	1.45645e-07	8.98803e-07	1.3884e-06	1.98055e-06	6.03593e-06	0.00043319	0.00424062	9.99158e-05	3.05541e-05	0.00652066	0.414717	0.0168709
H27	1.71947e-06	0.000205037	0.0015115	5.23078e-07	1.6067e-06	1.4958e-06	1.90611e-05	5.62763e-06	3.0124e-05	4.56502e-05	0.00630935	0.0303914	0.483565	1.44078e-06	6.11254e-07	2.61477e-07	1.45295e-06	1.10113e-06	1.05569e-06	7.83541e-06	0.00074873	0.000487326	4.31401e-05	3.46863e-05	0.00361026	0.0168709	0.409556
LDM — ajoene_z_39_LIDI_matrix
	S1	S2	S3	O4	C5	C6	C7	C8	C9	C10	C11	C12	C13	H14	H15	H16	H17	H18	H19	H20	H21	H22	H23	H24	H25	H26	H27
S1	12.9374	0.0035426	0.000584346	0.682722	0.468124	0.464079	0.0296773	0.0276596	0.0123256	0.0168642	9.66379e-05	0.000160324	0.000789389	0.0227073	0.0215253	0.0199376	0.0228284	0.00609683	0.00209599	0.000687436	2.59848e-05	3.00528e-05	0.00130715	0.000767919	3.13387e-05	0.00126102	8.65114e-05		92.2643	31.734
S2	0.0035426	14.5166	0.652446	0.00168599	0.0172479	0.000351332	0.063548	0.000622055	0.576991	0.000782342	0.0382818	0.00661867	0.00534692	0.0207617	0.00183612	4.34226e-05	8.20005e-05	0.00934703	0.000120017	0.0274236	0.00798277	0.00953154	8.93883e-05	1.78371e-05	0.000473997	0.00264951	0.000285888
S3	0.000584346	0.652446	14.6421	0.000298051	0.00211162	8.29302e-05	0.0108942	4.22416e-05	0.0404053	0.000102741	0.525245	0.0415476	0.0232969	0.00191209	0.000269415	6.82883e-06	1.2123e-05	0.00145688	1.07401e-05	0.0119761	0.0273192	0.0289578	9.45408e-06	1.79832e-06	0.00506962	0.00112097	0.00148723
O4	0.682722	0.00168599	0.000298051	8.34559	0.0615351	0.061151	0.00998513	0.0134608	0.00379848	0.00313918	0.000174678	0.00176582	0.0129429	0.0046031	0.00871298	0.00844304	0.00379069	0.000928584	0.010944	0.000150045	2.68185e-05	0.000105259	0.000288838	0.000482407	0.00032607	0.0190712	0.00186638
C5	0.468124	0.0172479	0.00211162	0.0615351	4.07193	0.0246916	0.517862	0.00876685	0.0353053	0.00503147	0.000136002	0.000118616	0.000286714	0.447444	0.463394	0.00376292	0.00475782	0.0191265	0.000228412	0.00542122	4.14689e-05	4.03796e-05	0.000159917	0.000355122	1.42007e-05	0.000217166	1.77669e-05
C6	0.464079	0.000351332	8.29302e-05	0.061151	0.0246916	4.06566	0.00496869	0.517412	0.0017224	0.0374221	1.36392e-05	5.63745e-05	0.000189893	0.00308413	0.0039489	0.466125	0.464591	0.000364148	0.0187163	0.000168606	8.25458e-06	4.1756e-06	0.00634953	0.00627615	5.75549e-06	0.000186676	4.3106e-05
C7	0.0296773	0.063548	0.0108942	0.00998513	0.517862	0.00496869	3.95722	0.000910021	0.879202	0.000515541	0.0017063	0.0022305	0.00498943	0.0161565	0.0192544	0.000403882	0.00099248	0.470577	2.83138e-05	0.0248797	0.000669329	0.000200146	1.72752e-05	4.54469e-05	6.52402e-05	0.000564808	0.000299177
C8	0.0276596	0.000622055	4.22416e-05	0.0134608	0.00876685	0.517412	0.000910021	3.97475	0.000150109	0.916389	7.79492e-06	3.4873e-06	1.18754e-05	0.011631	0.000608569	0.0178337	0.019127	0.000262159	0.465972	1.80283e-05	9.32307e-07	6.3513e-06	0.0299299	0.0305989	8.44175e-07	3.29925e-05	3.57221e-06
C9	0.0123256	0.576991	0.0404053	0.00379848	0.0353053	0.0017224	0.879202	0.000150109	4.08315	0.000209374	0.00217129	0.0076902	0.0107297	0.00398424	0.0102904	0.000205321	0.000466603	0.029828	1.43229e-05	0.463952	0.000469505	0.00030867	1.23268e-05	1.84993e-05	0.00026911	0.00115655	0.000356711
C10	0.0168642	0.000782342	0.000102741	0.00313918	0.00503147	0.0374221	0.000515541	0.916389	0.000209374	4.08049	6.3352e-06	2.89668e-06	6.29095e-06	0.00905017	0.000547107	0.0059839	0.0100131	0.000258234	0.02769	2.4736e-05	1.49615e-06	5.49159e-06	0.482877	0.481798	4.9734e-07	1.54075e-05	2.24795e-06
C11	9.66379e-05	0.0382818	0.525245	0.000174678	0.000136002	1.36392e-05	0.0017063	7.79492e-06	0.00217129	6.3352e-06	4.01201	0.516519	0.0367112	0.000114479	4.52535e-05	1.80802e-06	2.99983e-06	0.000111006	5.95331e-06	0.000332827	0.465903	0.462114	7.95683e-07	2.45058e-07	0.0205547	0.00566108	0.00639222
C12	0.000160324	0.00661867	0.0415476	0.00176582	0.000118616	5.63745e-05	0.0022305	3.4873e-06	0.0076902	2.89668e-06	0.516519	3.98375	0.914569	1.64374e-05	5.33235e-05	8.89745e-06	5.17599e-06	8.80395e-05	4.26827e-06	0.00185946	0.0190088	0.0180487	2.1281e-07	2.42734e-07	0.475635	0.0270525	0.0304963
C13	0.000789389	0.00534692	0.0232969	0.0129429	0.000286714	0.000189893	0.00498943	1.18754e-05	0.0107297	6.29095e-06	0.0367112	0.914569	4.06769	5.2928e-05	9.4524e-05	3.91241e-05	9.7727e-06	0.00018526	1.83504e-05	0.00117834	0.00793969	0.00622339	6.07296e-07	1.02561e-06	0.0296286	0.46441	0.48213
H14	0.0227073	0.0207617	0.00191209	0.0046031	0.447444	0.00308413	0.0161565	0.011631	0.00398424	0.00905017	0.000114479	1.64374e-05	5.2928e-05	0.359266	0.0141447	0.000170778	0.000202949	0.00456603	0.000462056	0.00026564	1.84891e-05	4.92746e-05	0.000232283	0.000381097	5.34908e-06	8.96797e-05	5.41031e-06
H15	0.0215253	0.00183612	0.000269415	0.00871298	0.463394	0.0039489	0.0192544	0.000608569	0.0102904	0.000547107	4.52535e-05	5.33235e-05	9.4524e-05	0.0141447	0.400372	0.00340996	0.000316975	0.000939601	9.12129e-05	0.000674932	2.21903e-05	7.31238e-06	2.60184e-05	0.000250277	2.33615e-06	1.43392e-05	2.71063e-06
H16	0.0199376	4.34226e-05	6.82883e-06	0.00844304	0.00376292	0.466125	0.000403882	0.0178337	0.000205321	0.0059839	1.80802e-06	8.89745e-06	3.91241e-05	0.000170778	0.00340996	0.403062	0.0148949	1.2584e-05	0.00502536	2.19447e-05	7.51533e-07	6.42876e-07	0.000446676	0.00389276	1.31603e-06	4.37061e-05	6.18596e-06
H17	0.0228284	8.20005e-05	1.2123e-05	0.00379069	0.00475782	0.464591	0.00099248	0.019127	0.000466603	0.0100131	2.99983e-06	5.17599e-06	9.7727e-06	0.000202949	0.000316975	0.0148949	0.391766	1.51717e-05	0.00109488	5.70447e-05	1.18986e-06	4.68908e-07	0.000770913	0.000477531	3.45566e-07	6.96174e-06	1.46517e-06
H18	0.00609683	0.00934703	0.00145688	0.000928584	0.0191265	0.000364148	0.470577	0.000262159	0.029828	0.000258234	0.000111006	8.80395e-05	0.00018526	0.00456603	0.000939601	1.2584e-05	1.51717e-05	0.403609	7.0179e-06	0.00361831	4.36213e-05	1.09111e-05	1.1437e-05	9.26167e-06	6.68605e-06	1.56096e-05	3.81187e-05
H19	0.00209599	0.000120017	1.07401e-05	0.010944	0.000228412	0.0187163	2.83138e-05	0.465972	1.43229e-05	0.02769	5.95331e-06	4.26827e-06	1.83504e-05	0.000462056	9.12129e-05	0.00502536	0.00109488	7.0179e-06	0.383217	1.77164e-06	2.92555e-07	7.05037e-06	0.00352879	0.006498	3.12091e-06	4.54379e-05	4.0057e-06
H20	0.000687436	0.0274236	0.0119761	0.000150045	0.00542122	0.000168606	0.0248797	1.80283e-05	0.463952	2.4736e-05	0.000332827	0.00185946	0.00117834	0.00026564	0.000674932	2.19447e-05	5.70447e-05	0.00361831	1.77164e-06	0.371496	2.99504e-05	0.000167346	1.84952e-06	2.07248e-06	0.000209519	4.74354e-05	3.83216e-05
H21	2.59848e-05	0.00798277	0.0273192	2.68185e-05	4.14689e-05	8.25458e-06	0.000669329	9.32307e-07	0.000469505	1.49615e-06	0.465903	0.0190088	0.00793969	1.84891e-05	2.21903e-05	7.51533e-07	1.18986e-06	4.36213e-05	2.92555e-07	2.99504e-05	0.401993	0.0145119	1.00888e-07	8.61634e-08	0.00186022	0.000421389	0.000808519
H22	3.00528e-05	0.00953154	0.0289578	0.000105259	4.03796e-05	4.1756e-06	0.000200146	6.3513e-06	0.00030867	5.49159e-06	0.462114	0.0180487	0.00622339	4.92746e-05	7.31238e-06	6.42876e-07	4.68908e-07	1.09111e-05	7.05037e-06	0.000167346	0.0145119	0.388199	5.14971e-07	2.10959e-07	0.00497642	0.00338502	0.000430475
H23	0.00130715	8.93883e-05	9.45408e-06	0.000288838	0.000159917	0.00634953	1.72752e-05	0.0299299	1.23268e-05	0.482877	7.95683e-07	2.1281e-07	6.07296e-07	0.000232283	2.60184e-05	0.000446676	0.000770913	1.1437e-05	0.00352879	1.84952e-06	1.00888e-07	5.14971e-07	0.406407	0.016913	5.02549e-08	1.02472e-06	2.05151e-07
H24	0.000767919	1.78371e-05	1.79832e-06	0.000482407	0.000355122	0.00627615	4.54469e-05	0.0305989	1.84993e-05	0.481798	2.45058e-07	2.42734e-07	1.02561e-06	0.000381097	0.000250277	0.00389276	0.000477531	9.26167e-06	0.006498	2.07248e-06	8.61634e-08	2.10959e-07	0.016913	0.417194	3.80107e-08	2.06923e-06	2.51413e-07
H25	3.13387e-05	0.000473997	0.00506962	0.00032607	1.42007e-05	5.75549e-06	6.52402e-05	8.44175e-07	0.00026911	4.9734e-07	0.0205547	0.475635	0.0296286	5.34908e-06	2.33615e-06	1.31603e-06	3.45566e-07	6.68605e-06	3.12091e-06	0.000209519	0.00186022	0.00497642	5.02549e-08	3.80107e-08	0.421727	0.00630632	0.00378484
H26	0.00126102	0.00264951	0.00112097	0.0190712	0.000217166	0.000186676	0.000564808	3.29925e-05	0.00115655	1.54075e-05	0.00566108	0.0270525	0.46441	8.96797e-05	1.43392e-05	4.37061e-05	6.96174e-06	1.56096e-05	4.54379e-05	4.74354e-05	0.000421389	0.00338502	1.02472e-06	2.06923e-06	0.00630632	0.366459	0.0154295
H27	8.65114e-05	0.000285888	0.00148723	0.00186638	1.77669e-05	4.3106e-05	0.000299177	3.57221e-06	0.000356711	2.24795e-06	0.00639222	0.0304963	0.48213	5.41031e-06	2.71063e-06	6.18596e-06	1.46517e-06	3.81187e-05	4.0057e-06	3.83216e-05	0.000808519	0.000430475	2.05151e-07	2.51413e-07	0.00378484	0.0154295	0.41112
LDM — ajoene_z_40_LIDI_matrix
	S1	S2	S3	O4	C5	C6	C7	C8	C9	C10	C11	C12	C13	H14	H15	H16	H17	H18	H19	H20	H21	H22	H23	H24	H25	H26	H27
S1	12.9013	0.00250616	0.000771111	0.684562	0.466093	0.461837	0.0303235	0.0278852	0.0114161	0.0149057	0.000300087	0.00225719	0.0101048	0.0170379	0.0255895	0.0235427	0.0219157	0.00430043	0.00322826	0.000624071	5.67745e-05	1.97513e-05	0.000868879	0.0008797	0.000131302	0.000569786	0.012449		92.2689	31.7342
S2	0.00250616	14.5336	0.648472	0.0013365	0.0176894	0.000315573	0.0585293	0.00024107	0.573209	0.000819551	0.0380881	0.0121975	0.00762843	0.0207167	0.00160026	6.01839e-05	5.34218e-05	0.00889224	1.20097e-05	0.0290653	0.00853541	0.00525998	0.000154841	3.1977e-05	0.000564014	0.0013917	0.000276229
S3	0.000771111	0.648472	14.6417	0.000247435	0.00193571	0.000108371	0.0152941	4.88299e-05	0.0427622	9.63563e-05	0.528697	0.0382002	0.0207295	0.00132857	0.000495119	1.66805e-05	1.84637e-05	0.00149624	1.04496e-05	0.00850553	0.027018	0.0296719	2.44745e-05	7.66026e-06	0.00647569	0.00125363	0.00142701
O4	0.684562	0.0013365	0.000247435	8.37705	0.0630124	0.0626694	0.00848906	0.00922938	0.00185842	0.00548716	6.12972e-05	0.000378003	0.00110488	0.00759642	0.00777816	0.00471721	0.00634047	0.0080783	0.000553765	0.00013954	1.26195e-05	6.44228e-06	0.000328225	0.000580364	3.43875e-05	9.3181e-05	0.00136017
C5	0.466093	0.0176894	0.00193571	0.0630124	4.07674	0.025379	0.517472	0.00596799	0.0347934	0.00481145	0.000218654	0.00134738	0.00356691	0.44931	0.457922	0.00649638	0.00415248	0.0180053	0.000310224	0.00549857	6.61368e-05	2.4712e-05	0.00089259	0.000132417	6.84371e-05	0.000339254	0.000617602
C6	0.461837	0.000315573	0.000108371	0.0626694	0.025379	4.0695	0.00500295	0.520448	0.00192554	0.0369068	2.24693e-05	0.00010757	0.000444741	0.00261938	0.00473696	0.462149	0.462938	0.000281834	0.0196151	0.000198199	3.82983e-06	3.35975e-06	0.00609626	0.00632453	1.33931e-05	0.000245261	0.000528954
C7	0.0303235	0.0585293	0.0152941	0.00848906	0.517472	0.00500295	3.96042	0.000681355	0.884591	0.000457	0.00159838	0.00376319	0.0036848	0.0164389	0.0193367	0.000601491	0.000994965	0.464609	2.34054e-05	0.0261907	0.000649122	0.000107339	0.00012953	1.2181e-05	0.000612587	0.000177172	0.000265443
C8	0.0278852	0.00024107	4.88299e-05	0.00922938	0.00596799	0.520448	0.000681355	3.9751	0.000164222	0.913002	3.97274e-05	0.00063491	0.00416444	0.00781881	0.000409729	0.0178921	0.0188244	0.000159985	0.472118	1.40687e-05	1.29916e-05	1.89926e-05	0.0299303	0.0299903	8.38514e-05	0.00565639	0.000930994
C9	0.0114161	0.573209	0.0427622	0.00185842	0.0347934	0.00192554	0.884591	0.000164222	4.09042	0.000197933	0.00220612	0.0074707	0.00406766	0.00424283	0.0105183	0.000268027	0.000423573	0.028639	1.20481e-05	0.46742	0.000409825	0.000356262	2.55293e-05	7.1855e-06	0.00162266	0.000158649	0.000161516
C10	0.0149057	0.000819551	9.63563e-05	0.00548716	0.00481145	0.0369068	0.000457	0.913002	0.000197933	4.07643	5.56148e-05	0.00045653	0.0025128	0.00867025	0.000389289	0.00597777	0.0091926	0.00019346	0.0293192	2.93862e-05	8.19513e-06	3.96925e-05	0.479715	0.48276	8.75382e-05	0.00478805	0.000326426
C11	0.000300087	0.0380881	0.528697	6.12972e-05	0.000218654	2.24693e-05	0.00159838	3.97274e-05	0.00220612	5.56148e-05	4.0111	0.516912	0.0368599	0.000251576	4.931e-05	3.86834e-06	3.24278e-06	9.62522e-05	2.76233e-05	0.00033363	0.463152	0.464171	2.82216e-06	1.52955e-05	0.0196836	0.0063907	0.0060913
C12	0.00225719	0.0121975	0.0382002	0.000378003	0.00134738	0.00010757	0.00376319	0.00063491	0.0074707	0.00045653	0.516912	3.96339	0.910935	0.00157502	0.000156301	2.18715e-05	5.02913e-06	9.10785e-05	0.000313545	0.000231679	0.0192838	0.0185321	1.24817e-05	4.40163e-05	0.471658	0.0294826	0.0291781
C13	0.0101048	0.00762843	0.0207295	0.00110488	0.00356691	0.000444741	0.0036848	0.00416444	0.00406766	0.0025128	0.0368599	0.910935	4.07581	0.00418383	0.000304023	9.41191e-05	3.15641e-05	9.56793e-05	0.00207739	7.68061e-05	0.00966508	0.00651622	6.81758e-05	0.000277178	0.0284722	0.475845	0.476877
H14	0.0170379	0.0207167	0.00132857	0.00759642	0.44931	0.00261938	0.0164389	0.00781881	0.00424283	0.00867025	0.000251576	0.00157502	0.00418383	0.360444	0.0135482	0.000386572	0.000276907	0.00431178	0.000170194	0.000300641	6.71116e-05	4.15119e-05	0.00140006	0.000229011	5.29398e-05	0.000974876	0.000147927
H15	0.0255895	0.00160026	0.000495119	0.00777816	0.457922	0.00473696	0.0193367	0.000409729	0.0105183	0.000389289	4.931e-05	0.000156301	0.000304023	0.0135482	0.384347	0.00462661	0.000272054	0.000626404	0.000130228	0.000675939	1.47209e-05	4.43098e-06	0.000254045	2.72703e-05	2.48249e-05	2.95146e-05	0.000129046
H16	0.0235427	6.01839e-05	1.66805e-05	0.00471721	0.00649638	0.462149	0.000601491	0.0178921	0.000268027	0.00597777	3.86834e-06	2.18715e-05	9.41191e-05	0.000386572	0.00462661	0.393508	0.0145092	3.74251e-05	0.0049197	3.06767e-05	8.44279e-07	5.0201e-07	0.00361964	0.000421269	2.03694e-06	5.21619e-05	0.000149179
H17	0.0219157	5.34218e-05	1.84637e-05	0.00634047	0.00415248	0.462938	0.000994965	0.0188244	0.000423573	0.0091926	3.24278e-06	5.02913e-06	3.15641e-05	0.000276907	0.000272054	0.0145092	0.386032	2.611e-05	0.00164403	5.23367e-05	7.36672e-07	4.44119e-07	0.000499476	0.000799562	1.24548e-06	4.24035e-05	1.98193e-05
H18	0.00430043	0.00889224	0.00149624	0.0080783	0.0180053	0.000281834	0.464609	0.000159985	0.028639	0.00019346	9.62522e-05	9.10785e-05	9.56793e-05	0.00431178	0.000626404	3.74251e-05	2.611e-05	0.382066	4.35903e-06	0.00346687	3.69618e-05	7.58569e-06	2.81328e-05	6.5588e-06	1.93334e-05	1.44743e-05	1.04925e-05
H19	0.00322826	1.20097e-05	1.04496e-05	0.000553765	0.000310224	0.0196151	2.34054e-05	0.472118	1.20481e-05	0.0293192	2.76233e-05	0.000313545	0.00207739	0.000170194	0.000130228	0.0049197	0.00164403	4.35903e-06	0.408231	8.14306e-07	4.89041e-06	4.37888e-06	0.00675314	0.00369546	3.35008e-05	0.00168205	0.00100031
H20	0.000624071	0.0290653	0.00850553	0.00013954	0.00549857	0.000198199	0.0261907	1.40687e-05	0.46742	2.93862e-05	0.00033363	0.000231679	7.68061e-05	0.000300641	0.000675939	3.06767e-05	5.23367e-05	0.00346687	8.14306e-07	0.379708	1.76849e-05	0.000165362	4.82366e-06	1.14067e-06	0.000158371	2.24764e-05	6.10962e-06
H21	5.67745e-05	0.00853541	0.027018	1.26195e-05	6.61368e-05	3.82983e-06	0.000649122	1.29916e-05	0.000409825	8.19513e-06	0.463152	0.0192838	0.00966508	6.71116e-05	1.47209e-05	8.44279e-07	7.36672e-07	3.69618e-05	4.89041e-06	1.76849e-05	0.396018	0.0146634	3.23179e-07	7.22017e-07	0.00129727	0.000499264	0.00078218
H22	1.97513e-05	0.00525998	0.0296719	6.44228e-06	2.4712e-05	3.35975e-06	0.000107339	1.89926e-05	0.000356262	3.96925e-05	0.464171	0.0185321	0.00651622	4.15119e-05	4.43098e-06	5.0201e-07	4.44119e-07	7.58569e-06	4.37888e-06	0.000165362	0.0146634	0.397072	1.41705e-06	1.77372e-05	0.00520643	0.0044215	0.000474909
H23	0.000868879	0.000154841	2.44745e-05	0.000328225	0.00089259	0.00609626	0.00012953	0.0299303	2.55293e-05	0.479715	2.82216e-06	1.24817e-05	6.81758e-05	0.00140006	0.000254045	0.00361964	0.000499476	2.81328e-05	0.00675314	4.82366e-06	3.23179e-07	1.41705e-06	0.408965	0.0165968	1.40528e-06	0.000140329	3.38957e-05
H24	0.0008797	3.1977e-05	7.66026e-06	0.000580364	0.000132417	0.00632453	1.2181e-05	0.0299903	7.1855e-06	0.48276	1.52955e-05	4.40163e-05	0.000277178	0.000229011	2.72703e-05	0.000421269	0.000799562	6.5588e-06	0.00369546	1.14067e-06	7.22017e-07	1.77372e-05	0.0165968	0.40675	2.58176e-05	0.00073143	4.39679e-05
H25	0.000131302	0.000564014	0.00647569	3.43875e-05	6.84371e-05	1.33931e-05	0.000612587	8.38514e-05	0.00162266	8.75382e-05	0.0196836	0.471658	0.0284722	5.29398e-05	2.48249e-05	2.03694e-06	1.24548e-06	1.93334e-05	3.35008e-05	0.000158371	0.00129727	0.00520643	1.40528e-06	2.58176e-05	0.407992	0.00656454	0.00354825
H26	0.000569786	0.0013917	0.00125363	9.3181e-05	0.000339254	0.000245261	0.000177172	0.00565639	0.000158649	0.00478805	0.0063907	0.0294826	0.475845	0.000974876	2.95146e-05	5.21619e-05	4.24035e-05	1.44743e-05	0.00168205	2.24764e-05	0.000499264	0.0044215	0.000140329	0.00073143	0.00656454	0.406945	0.0165712
H27	0.012449	0.000276229	0.00142701	0.00136017	0.000617602	0.000528954	0.000265443	0.000930994	0.000161516	0.000326426	0.0060913	0.0291781	0.476877	0.000147927	0.000129046	0.000149179	1.98193e-05	1.04925e-05	0.00100031	6.10962e-06	0.00078218	0.000474909	3.38957e-05	4.39679e-05	0.00354825	0.0165712	0.398211
LDM — ajoene_z_41_LIDI_matrix
	S1	S2	S3	O4	C5	C6	C7	C8	C9	C10	C11	C12	C13	H14	H15	H16	H17	H18	H19	H20	H21	H22	H23	H24	H25	H26	H27
S1	12.9329	0.00295416	0.000614757	0.687185	0.461257	0.462345	0.0281377	0.0325939	0.0153559	0.0172874	0.000368148	3.7311e-05	3.99621e-05	0.0182767	0.0218918	0.0218619	0.0221151	0.0025924	0.00309238	0.000894477	0.000191209	0.000528335	0.000864873	0.00074692	9.13431e-06	2.61316e-06	2.65762e-06		92.2782	31.7252
S2	0.00295416	14.5271	0.644534	0.00131488	0.0150302	0.00136896	0.060648	0.000865432	0.574872	0.0083503	0.0367277	0.00929947	0.00528166	0.0159688	0.00150202	0.000147028	0.00326819	0.00877999	0.00035586	0.028456	0.00686111	0.00259619	0.000642736	0.0213772	0.00032807	0.000483397	0.00024536
S3	0.000614757	0.644534	14.6299	0.000311424	0.00177682	0.000226802	0.0137265	0.000143772	0.0430116	0.000604181	0.525856	0.0429131	0.0213172	0.00136668	0.000358233	2.46371e-05	0.000728391	0.00136089	2.03184e-05	0.0119186	0.0276954	0.0290894	2.97217e-05	0.00115948	0.0055115	0.00109092	0.00130064
O4	0.687185	0.00131488	0.000311424	8.362	0.0620855	0.0625472	0.018608	0.00927156	0.00320009	0.00602838	7.68925e-05	1.20687e-05	8.53234e-06	0.00749496	0.00299495	0.00762814	0.00333193	0.0150299	0.0004995	0.000250891	5.5954e-05	0.000125629	0.000561339	0.000303771	2.44308e-06	6.03993e-07	7.38552e-07
C5	0.461257	0.0150302	0.00177682	0.0620855	4.07405	0.024595	0.518449	0.00479356	0.0345452	0.00462127	0.000160017	3.76783e-05	2.81424e-05	0.455487	0.465142	0.00383427	0.00538366	0.0175388	0.000293929	0.00547803	3.95557e-05	0.000104937	0.000123125	0.00121668	3.77272e-06	1.98601e-06	1.40012e-06
C6	0.462345	0.00136896	0.000226802	0.0625472	0.024595	4.07567	0.00659607	0.520406	0.00364812	0.0366266	0.00143686	0.000141052	3.37499e-05	0.00336555	0.0048864	0.463999	0.45404	0.000165964	0.0198496	0.000105315	0.000960764	0.00212874	0.00633945	0.0052512	2.52035e-05	4.07692e-06	5.45529e-06
C7	0.0281377	0.060648	0.0137265	0.018608	0.518449	0.00659607	3.95703	0.000710326	0.880058	0.000437735	0.00171266	0.000358669	0.000489782	0.016671	0.0198591	0.00043416	0.00952229	0.459043	0.000188441	0.0255514	0.000107112	0.00121549	2.03235e-05	0.000358731	5.76729e-05	3.58479e-05	2.20128e-05
C8	0.0325939	0.000865432	0.000143772	0.00927156	0.00479356	0.520406	0.000710326	3.98155	0.000346251	0.915595	0.000656312	5.12221e-05	4.33638e-05	0.00564363	0.000484435	0.0185392	0.0173752	0.000101915	0.474205	1.70422e-05	0.00211679	0.000148882	0.0300246	0.0287519	4.14885e-06	5.2932e-06	2.41147e-06
C9	0.0153559	0.574872	0.0430116	0.00320009	0.0345452	0.00364812	0.880058	0.000346251	4.10563	0.000380244	0.00392381	0.000676003	0.000215971	0.00343629	0.00952709	0.000263056	0.00763707	0.027788	0.000172487	0.465123	0.000290149	0.00357789	2.71475e-05	0.000722308	0.000176408	1.85598e-05	2.98762e-05
C10	0.0172874	0.0083503	0.000604181	0.00602838	0.00462127	0.0366266	0.000437735	0.915595	0.000380244	4.0894	0.00216222	0.000156265	0.000170301	0.00852085	0.000457782	0.00792058	0.00521464	0.000135847	0.0296697	9.03742e-05	0.00640837	0.000105053	0.483291	0.466649	8.94876e-06	1.51485e-05	7.3122e-06
C11	0.000368148	0.0367277	0.525856	7.68925e-05	0.000160017	0.00143686	0.00171266	0.000656312	0.00392381	0.00216222	4.01076	0.51531	0.0376329	8.53721e-05	4.3822e-05	7.20135e-05	0.0043154	9.67388e-05	8.01066e-05	0.000411162	0.457511	0.461741	8.8149e-05	0.00345196	0.0196374	0.00633603	0.00632601
C12	3.7311e-05	0.00929947	0.0429131	1.20687e-05	3.76783e-05	0.000141052	0.000358669	5.12221e-05	0.000676003	0.000156265	0.51531	3.97862	0.920513	2.4941e-05	9.63959e-06	6.48272e-06	0.000448529	2.31455e-05	9.31635e-06	5.33828e-05	0.0183459	0.0180622	7.14557e-06	0.000267932	0.47333	0.0300542	0.0301805
C13	3.99621e-05	0.00528166	0.0213172	8.53234e-06	2.81424e-05	3.37499e-05	0.000489782	4.33638e-05	0.000215971	0.000170301	0.0376329	0.920513	4.0785	1.4572e-05	1.64057e-05	4.99428e-06	0.000104745	2.18778e-05	6.19101e-06	2.18988e-05	0.00854677	0.00648901	1.04793e-05	0.000226597	0.0292671	0.483036	0.480435
H14	0.0182767	0.0159688	0.00136668	0.00749496	0.455487	0.00336555	0.016671	0.00564363	0.00343629	0.00852085	8.53721e-05	2.4941e-05	1.4572e-05	0.373489	0.0142824	0.000393213	0.000732109	0.00456702	0.00013606	0.000227488	3.94782e-05	7.68816e-06	0.000252969	0.0029272	7.91167e-07	7.50352e-07	5.51255e-07
H15	0.0218918	0.00150202	0.000358233	0.00299495	0.465142	0.0048864	0.0198591	0.000484435	0.00952709	0.000457782	4.3822e-05	9.63959e-06	1.64057e-05	0.0142824	0.391001	0.000947221	0.000443428	0.00104739	1.69337e-05	0.000701333	4.72332e-06	3.99965e-05	1.86971e-05	0.000148947	1.59671e-06	1.11112e-06	6.24951e-07
H16	0.0218619	0.000147028	2.46371e-05	0.00762814	0.00383427	0.463999	0.00043416	0.0185392	0.000263056	0.00792058	7.20135e-05	6.48272e-06	4.99428e-06	0.000393213	0.000947221	0.386001	0.0141266	1.3838e-05	0.00210644	5.85418e-06	7.09661e-05	8.74061e-05	0.000780718	0.000429617	1.36127e-06	4.00426e-07	8.1343e-07
H17	0.0221151	0.00326819	0.000728391	0.00333193	0.00538366	0.45404	0.00952229	0.0173752	0.00763707	0.00521464	0.0043154	0.000448529	0.000104745	0.000732109	0.000443428	0.0141266	0.376055	0.000204581	0.00438233	0.000149258	0.0015955	0.0045555	0.000329567	0.00222451	9.5012e-05	9.7589e-06	1.81927e-05
H18	0.0025924	0.00877999	0.00136089	0.0150299	0.0175388	0.000165964	0.459043	0.000101915	0.027788	0.000135847	9.67388e-05	2.31455e-05	2.18778e-05	0.00456702	0.00104739	1.3838e-05	0.000204581	0.366012	5.46912e-06	0.00350047	6.17817e-06	4.52542e-05	4.5023e-06	4.01434e-05	5.26145e-06	1.54994e-06	1.30792e-06
H19	0.00309238	0.00035586	2.03184e-05	0.0004995	0.000293929	0.0198496	0.000188441	0.474205	0.000172487	0.0296697	8.01066e-05	9.31635e-06	6.19101e-06	0.00013606	1.69337e-05	0.00210644	0.00438233	5.46912e-06	0.410607	8.22097e-06	0.000150591	5.79837e-05	0.00377154	0.00630624	5.92409e-07	7.31892e-07	4.08154e-07
H20	0.000894477	0.028456	0.0119186	0.000250891	0.00547803	0.000105315	0.0255514	1.70422e-05	0.465123	9.03742e-05	0.000411162	5.33828e-05	2.18988e-05	0.000227488	0.000701333	5.85418e-06	0.000149258	0.00350047	8.22097e-06	0.374192	0.000111455	0.000352943	6.97564e-06	0.000207314	1.63305e-05	1.14276e-06	6.47222e-06
H21	0.000191209	0.00686111	0.0276954	5.5954e-05	3.95557e-05	0.000960764	0.000107112	0.00211679	0.000290149	0.00640837	0.457511	0.0183459	0.00854677	3.94782e-05	4.72332e-06	7.09661e-05	0.0015955	6.17817e-06	0.000150591	0.000111455	0.384127	0.014791	0.000274279	0.00689877	0.00166852	0.000764317	0.000516514
H22	0.000528335	0.00259619	0.0290894	0.000125629	0.000104937	0.00212874	0.00121549	0.000148882	0.00357789	0.000105053	0.461741	0.0180622	0.00648901	7.68816e-06	3.99965e-05	8.74061e-05	0.0045555	4.52542e-05	5.79837e-05	0.000352943	0.014791	0.396857	2.85196e-06	0.000160304	0.00490691	0.000469926	0.00403435
H23	0.000864873	0.000642736	2.97217e-05	0.000561339	0.000123125	0.00633945	2.03235e-05	0.0300246	2.71475e-05	0.483291	8.8149e-05	7.14557e-06	1.04793e-05	0.000252969	1.86971e-05	0.000780718	0.000329567	4.5023e-06	0.00377154	6.97564e-06	0.000274279	2.85196e-06	0.407416	0.0156004	3.12579e-07	8.10744e-07	4.32455e-07
H24	0.00074692	0.0213772	0.00115948	0.000303771	0.00121668	0.0052512	0.000358731	0.0287519	0.000722308	0.466649	0.00345196	0.000267932	0.000226597	0.0029272	0.000148947	0.000429617	0.00222451	4.01434e-05	0.00630624	0.000207314	0.00689877	0.000160304	0.0156004	0.385258	1.03286e-05	2.20569e-05	9.36323e-06
H25	9.13431e-06	0.00032807	0.0055115	2.44308e-06	3.77272e-06	2.52035e-05	5.76729e-05	4.14885e-06	0.000176408	8.94876e-06	0.0196374	0.47333	0.0292671	7.91167e-07	1.59671e-06	1.36127e-06	9.5012e-05	5.26145e-06	5.92409e-07	1.63305e-05	0.00166852	0.00490691	3.12579e-07	1.03286e-05	0.407798	0.00361361	0.00673134
H26	2.61316e-06	0.000483397	0.00109092	6.03993e-07	1.98601e-06	4.07692e-06	3.58479e-05	5.2932e-06	1.85598e-05	1.51485e-05	0.00633603	0.0300542	0.483036	7.50352e-07	1.11112e-06	4.00426e-07	9.7589e-06	1.54994e-06	7.31892e-07	1.14276e-06	0.000764317	0.000469926	8.10744e-07	2.20569e-05	0.00361361	0.406893	0.0166472
H27	2.65762e-06	0.00024536	0.00130064	7.38552e-07	1.40012e-06	5.45529e-06	2.20128e-05	2.41147e-06	2.98762e-05	7.3122e-06	0.00632601	0.0301805	0.480435	5.51255e-07	6.24951e-07	8.1343e-07	1.81927e-05	1.30792e-06	4.08154e-07	6.47222e-06	0.000516514	0.00403435	4.32455e-07	9.36323e-06	0.00673134	0.0166472	0.409381
LDM — ajoene_z_42_LIDI_matrix
	S1	S2	S3	O4	C5	C6	C7	C8	C9	C10	C11	C12	C13	H14	H15	H16	H17	H18	H19	H20	H21	H22	H23	H24	H25	H26	H27
S1	12.9153	0.00373392	0.000441355	0.686199	0.461439	0.465224	0.0278904	0.0317051	0.0137403	0.0175842	8.35191e-05	0.000205526	0.000439003	0.0237298	0.0217698	0.0184772	0.0250238	0.00354342	0.00180709	0.000685705	1.7972e-05	2.36149e-05	0.000961005	0.000786817	1.25046e-05	3.01239e-05	0.000383379		92.2553	31.7449
S2	0.00373392	14.5014	0.653412	0.00126896	0.0152112	0.00657711	0.0649633	0.000643737	0.575681	0.000249959	0.0385878	0.0101418	0.0063883	0.0160815	0.00167574	0.00433009	0.00769543	0.00957305	5.58061e-05	0.0265464	0.00663258	0.00839791	2.81063e-05	2.35538e-05	0.000553773	0.000235895	0.00114472
S3	0.000441355	0.653412	14.6219	0.000154423	0.00194053	0.000491193	0.0089327	5.27315e-05	0.0405148	5.03259e-05	0.528031	0.0396506	0.0208462	0.00177265	0.000219639	0.000411209	0.00057706	0.00141726	9.9241e-06	0.0147029	0.0289645	0.0269868	5.42955e-06	6.0249e-05	0.00667698	0.00149164	0.00121758
O4	0.686199	0.00126896	0.000154423	8.3765	0.0636031	0.0626118	0.0095729	0.0097109	0.00533435	0.00305222	3.66665e-05	0.000207065	0.00037204	0.00621328	0.00537644	0.00786728	0.00651381	0.000679745	0.00590013	0.000476581	7.78672e-06	1.57879e-05	0.000204236	0.000370232	1.50035e-05	3.02505e-05	0.000224801
C5	0.461439	0.0152112	0.00194053	0.0636031	4.06888	0.0245892	0.520909	0.00499237	0.0350518	0.00227049	0.00013444	8.83741e-05	0.000116609	0.457721	0.462973	0.00201214	0.00487072	0.0187769	0.000168968	0.00544813	2.38534e-05	5.71627e-05	0.000237303	0.000109671	2.63055e-05	8.576e-06	1.77679e-05
C6	0.465224	0.00657711	0.000491193	0.0626118	0.0245892	4.07268	0.00697763	0.518032	0.00457418	0.037762	0.000126928	0.00143821	0.00484703	0.00487762	0.00441101	0.451572	0.458843	0.000291027	0.0189598	0.000111043	3.45489e-05	3.94868e-05	0.00638511	0.00591232	7.93169e-05	0.000319337	0.00249981
C7	0.0278904	0.0649633	0.0089327	0.0095729	0.520909	0.00697763	3.96546	0.000765665	0.877127	0.000129039	0.0017208	0.000962541	0.00170433	0.0170001	0.0191139	0.00865854	0.000491782	0.471439	0.000195804	0.0245482	0.000212851	0.00044373	1.35611e-05	2.96839e-05	6.55568e-05	8.00056e-05	0.000118353
C8	0.0317051	0.000643737	5.27315e-05	0.0097109	0.00499237	0.518032	0.000765665	3.97811	0.000370919	0.920859	1.76787e-05	0.000142763	0.000993871	0.000423601	0.00103538	0.0167703	0.018674	2.10436e-05	0.470095	7.29857e-06	7.81873e-06	2.85567e-06	0.0300747	0.0305091	3.67113e-05	0.000238848	0.00210281
C9	0.0137403	0.575681	0.0405148	0.00533435	0.0350518	0.00457418	0.877127	0.000370919	4.09804	0.000268688	0.00208606	0.00632754	0.00470511	0.00394001	0.00859305	0.00740975	0.000451584	0.0303504	0.000159894	0.463059	0.000306527	0.00046514	1.73844e-05	2.41387e-05	0.000702542	0.000171178	0.000147976
C10	0.0175842	0.000249959	5.03259e-05	0.00305222	0.00227049	0.037762	0.000129039	0.920859	0.000268688	4.08323	3.43108e-05	0.000368818	0.00307855	0.000233411	0.000538769	0.00568634	0.00900626	1.21517e-05	0.0285641	1.07403e-05	1.03084e-05	3.35096e-06	0.483562	0.478303	6.04154e-05	0.00206338	0.00358254
C11	8.35191e-05	0.0385878	0.528031	3.66665e-05	0.00013444	0.000126928	0.0017208	1.76787e-05	0.00208606	3.43108e-05	4.01374	0.517022	0.0364829	0.000108527	4.33443e-05	0.000208231	8.45122e-05	0.000118669	3.48287e-06	0.000392731	0.463112	0.462752	2.62865e-06	0.000104613	0.0197676	0.00621756	0.00614135
C12	0.000205526	0.0101418	0.0396506	0.000207065	8.83741e-05	0.00143821	0.000962541	0.000142763	0.00632754	0.000368818	0.517022	3.96736	0.91175	1.62658e-05	1.98792e-05	0.00349049	5.20325e-05	5.43996e-05	5.6909e-05	0.00252126	0.0182597	0.0193748	2.50612e-05	0.000791196	0.472437	0.0299391	0.0287901
C13	0.000439003	0.0063883	0.0208462	0.00037204	0.000116609	0.00484703	0.00170433	0.000993871	0.00470511	0.00307855	0.0364829	0.91175	4.0753	1.98981e-05	4.83801e-05	0.0110969	0.000253085	6.29148e-05	0.000193367	0.000891923	0.0062423	0.00951413	0.000182009	0.00558519	0.0288854	0.480543	0.474093
H14	0.0237298	0.0160815	0.00177265	0.00621328	0.457721	0.00487762	0.0170001	0.000423601	0.00394001	0.000233411	0.000108527	1.62658e-05	1.98981e-05	0.384877	0.0144361	0.000173122	0.00390452	0.00480532	1.05909e-05	0.000228921	2.01591e-05	4.78676e-05	2.53786e-05	1.28902e-05	2.93227e-06	1.87589e-06	5.38259e-06
H15	0.0217698	0.00167574	0.000219639	0.00537644	0.462973	0.00441101	0.0191139	0.00103538	0.00859305	0.000538769	4.33443e-05	1.98792e-05	4.83801e-05	0.0144361	0.386515	0.000188847	0.000347237	0.00167991	1.7045e-05	0.000659295	6.37945e-06	1.65304e-05	6.61726e-05	2.46042e-05	9.67357e-07	2.17472e-06	6.61146e-06
H16	0.0184772	0.00433009	0.000411209	0.00786728	0.00201214	0.451572	0.00865854	0.0167703	0.00740975	0.00568634	0.000208231	0.00349049	0.0110969	0.000173122	0.000188847	0.371577	0.0137818	0.000223152	0.0045115	0.000148942	2.83546e-05	0.000101224	0.000398023	0.00319353	0.00012098	0.000992748	0.00318802
H17	0.0250238	0.00769543	0.00057706	0.00651381	0.00487072	0.458843	0.000491782	0.018674	0.000451584	0.00900626	8.45122e-05	5.20325e-05	0.000253085	0.00390452	0.000347237	0.0137818	0.386593	8.7362e-05	0.00146571	4.94994e-05	4.08958e-05	4.67493e-06	0.000766317	0.00046567	1.13867e-05	3.43791e-05	0.000246354
H18	0.00354342	0.00957305	0.00141726	0.000679745	0.0187769	0.000291027	0.471439	2.10436e-05	0.0303504	1.21517e-05	0.000118669	5.43996e-05	6.29148e-05	0.00480532	0.00167991	0.000223152	8.7362e-05	0.400332	3.77126e-06	0.00367533	1.31035e-05	3.95537e-05	7.2742e-07	1.70253e-06	1.57747e-05	4.81532e-06	4.77995e-06
H19	0.00180709	5.58061e-05	9.9241e-06	0.00590013	0.000168968	0.0189598	0.000195804	0.470095	0.000159894	0.0285641	3.48287e-06	5.6909e-05	0.000193367	1.05909e-05	1.7045e-05	0.0045115	0.00146571	3.77126e-06	0.39425	4.64225e-06	3.29452e-07	6.52295e-07	0.00359523	0.00646963	2.70535e-06	0.000133218	6.68186e-05
H20	0.000685705	0.0265464	0.0147029	0.000476581	0.00544813	0.000111043	0.0245482	7.29857e-06	0.463059	1.07403e-05	0.000392731	0.00252126	0.000891923	0.000228921	0.000659295	0.000148942	4.94994e-05	0.00367533	4.64225e-06	0.368843	0.000190622	3.7195e-05	5.87886e-07	9.3945e-07	0.00101345	3.33055e-05	4.02125e-05
H21	1.7972e-05	0.00663258	0.0289645	7.78672e-06	2.38534e-05	3.45489e-05	0.000212851	7.81873e-06	0.000306527	1.03084e-05	0.463112	0.0182597	0.0062423	2.01591e-05	6.37945e-06	2.83546e-05	4.08958e-05	1.31035e-05	3.29452e-07	0.000190622	0.390975	0.0143693	3.89857e-07	5.52607e-06	0.00517503	0.000456954	0.00406474
H22	2.36149e-05	0.00839791	0.0269868	1.57879e-05	5.71627e-05	3.94868e-05	0.00044373	2.85567e-06	0.00046514	3.35096e-06	0.462752	0.0193748	0.00951413	4.78676e-05	1.65304e-05	0.000101224	4.67493e-06	3.95537e-05	6.52295e-07	3.7195e-05	0.0143693	0.393615	2.11159e-07	1.08847e-05	0.00133812	0.000784059	0.000463187
H23	0.000961005	2.81063e-05	5.42955e-06	0.000204236	0.000237303	0.00638511	1.35611e-05	0.0300747	1.73844e-05	0.483562	2.62865e-06	2.50612e-05	0.000182009	2.53786e-05	6.61726e-05	0.000398023	0.000766317	7.2742e-07	0.00359523	5.87886e-07	3.89857e-07	2.11159e-07	0.409117	0.0166964	1.02018e-06	0.000191942	0.000125301
H24	0.000786817	2.35538e-05	6.0249e-05	0.000370232	0.000109671	0.00591232	2.96839e-05	0.0305091	2.41387e-05	0.478303	0.000104613	0.000791196	0.00558519	1.28902e-05	2.46042e-05	0.00319353	0.00046567	1.70253e-06	0.00646963	9.3945e-07	5.52607e-06	1.08847e-05	0.0166964	0.412978	4.71062e-05	0.00433123	0.00210213
H25	1.25046e-05	0.000553773	0.00667698	1.50035e-05	2.63055e-05	7.93169e-05	6.55568e-05	3.67113e-05	0.000702542	6.04154e-05	0.0197676	0.472437	0.0288854	2.93227e-06	9.67357e-07	0.00012098	1.13867e-05	1.57747e-05	2.70535e-06	0.00101345	0.00517503	0.00133812	1.02018e-06	4.71062e-05	0.411102	0.00366596	0.00654501
H26	3.01239e-05	0.000235895	0.00149164	3.02505e-05	8.576e-06	0.000319337	8.00056e-05	0.000238848	0.000171178	0.00206338	0.00621756	0.0299391	0.480543	1.87589e-06	2.17472e-06	0.000992748	3.43791e-05	4.81532e-06	0.000133218	3.33055e-05	0.000456954	0.000784059	0.000191942	0.00433123	0.00366596	0.40862	0.016602
H27	0.000383379	0.00114472	0.00121758	0.000224801	1.77679e-05	0.00249981	0.000118353	0.00210281	0.000147976	0.00358254	0.00614135	0.0287901	0.474093	5.38259e-06	6.61146e-06	0.00318802	0.000246354	4.77995e-06	6.68186e-05	4.02125e-05	0.00406474	0.000463187	0.000125301	0.00210213	0.00654501	0.016602	0.398001
LDM — ajoene_z_43_LIDI_matrix
	S1	S2	S3	O4	C5	C6	C7	C8	C9	C10	C11	C12	C13	H14	H15	H16	H17	H18	H19	H20	H21	H22	H23	H24	H25	H26	H27
S1	12.918	0.00305942	0.00104593	0.68527	0.461486	0.467256	0.0278813	0.0317059	0.0167786	0.0166114	0.000107954	0.000361547	0.000706292	0.018931	0.0223182	0.0244459	0.0199732	0.00152418	0.00210513	0.00121388	2.95029e-05	9.4758e-06	0.000734347	0.000977691	4.03881e-05	8.06343e-05	0.000148747		92.2888	31.7122
S2	0.00305942	14.5365	0.646263	0.00127315	0.0168923	0.00538014	0.0557165	0.000570347	0.570912	0.000176536	0.0381772	0.0115451	0.00681609	0.0210392	0.00176372	0.00405363	0.00589671	0.00879366	0.000115535	0.0292774	0.00852887	0.00539099	2.61506e-05	1.69596e-05	0.000566842	0.00125037	0.000266618
S3	0.00104593	0.646263	14.6378	0.000310928	0.00184817	0.000542423	0.0159645	8.72317e-05	0.0428667	2.84119e-05	0.52935	0.0381061	0.0201975	0.00123601	0.000455904	0.000412165	0.000813387	0.00153841	2.00704e-05	0.00774721	0.0269764	0.0295525	5.6723e-06	3.82658e-06	0.00669151	0.00126523	0.00150495
O4	0.68527	0.00127315	0.000310928	8.3711	0.0623857	0.0623407	0.0135907	0.0101808	0.00330215	0.00289031	3.24695e-05	0.000193858	0.000410982	0.00794548	0.00369414	0.0057575	0.00848604	0.00781489	0.00708244	0.000228146	9.50459e-06	3.31088e-06	0.000422962	0.000209635	1.44129e-05	6.63978e-05	4.18102e-05
C5	0.461486	0.0168923	0.00184817	0.0623857	4.06999	0.0244897	0.518495	0.00492312	0.0337182	0.00204562	0.000255146	0.00231965	0.00657775	0.455566	0.462612	0.00330459	0.00321236	0.0179149	0.00021616	0.00538244	8.18116e-05	2.56629e-05	0.000109574	0.00024025	9.64507e-05	0.000746829	0.001296
C6	0.467256	0.00538014	0.000542423	0.0623407	0.0244897	4.07285	0.00800733	0.517438	0.00506413	0.0382232	2.94222e-05	5.73485e-05	9.72371e-05	0.00329081	0.00470721	0.453131	0.463764	0.000178388	0.019001	0.000120049	1.54217e-05	5.71903e-06	0.00636164	0.00641866	8.11524e-06	5.66239e-06	4.5944e-05
C7	0.0278813	0.0557165	0.0159645	0.0135907	0.518495	0.00800733	3.94334	0.000924595	0.87446	0.000363195	0.00149469	0.00457748	0.0045307	0.0169033	0.0196638	0.0103652	0.000415027	0.464535	2.97228e-05	0.0259569	0.000620631	0.000104951	2.21347e-05	5.57194e-05	0.000755417	0.000226434	0.000376903
C8	0.0317059	0.000570347	8.72317e-05	0.0101808	0.00492312	0.517438	0.000924595	3.98048	0.000507568	0.923407	4.71067e-06	1.28991e-05	2.90346e-05	0.000342057	0.000979206	0.0180868	0.0177509	2.34862e-05	0.469199	1.45294e-05	1.7305e-06	8.16436e-07	0.0307738	0.0302824	1.06052e-06	8.71236e-07	1.40447e-05
C9	0.0167786	0.570912	0.0428667	0.00330215	0.0337182	0.00506413	0.87446	0.000507568	4.09222	0.000791832	0.00216753	0.00758892	0.00398004	0.00395096	0.00842669	0.0095968	0.000395253	0.0283448	1.27596e-05	0.46766	0.000395095	0.000355335	2.96679e-05	4.52795e-05	0.00177026	0.000172125	0.00017422
C10	0.0166114	0.000176536	2.84119e-05	0.00289031	0.00204562	0.0382232	0.000363195	0.923407	0.000791832	4.0815	2.36177e-06	1.08054e-05	1.57199e-05	6.33635e-05	0.000554296	0.00920887	0.00631127	9.22567e-06	0.0283166	2.46532e-05	3.30535e-07	6.88898e-07	0.481948	0.483556	2.39196e-06	7.9192e-07	6.6966e-06
C11	0.000107954	0.0381772	0.52935	3.24695e-05	0.000255146	2.94222e-05	0.00149469	4.71067e-06	0.00216753	2.36177e-06	4.01144	0.516674	0.0367892	0.000259866	0.000135774	6.53131e-05	3.50392e-05	8.73279e-05	6.34474e-07	0.000330184	0.462568	0.463976	3.00989e-07	2.71695e-07	0.0196602	0.00640218	0.0062646
C12	0.000361547	0.0115451	0.0381061	0.000193858	0.00231965	5.73485e-05	0.00457748	1.28991e-05	0.00758892	1.08054e-05	0.516674	3.96134	0.911724	0.00157726	0.000810501	4.22736e-05	6.57982e-06	9.2991e-05	7.77307e-07	0.00021947	0.0193436	0.0185331	6.47325e-07	1.30686e-06	0.471413	0.0301354	0.0299991
C13	0.000706292	0.00681609	0.0201975	0.000410982	0.00657775	9.72371e-05	0.0045307	2.90346e-05	0.00398004	1.57199e-05	0.0367892	0.911724	4.0737	0.0045219	0.00322448	4.00223e-05	1.38636e-05	0.000100696	1.58721e-06	7.90586e-05	0.0098823	0.00645465	9.5668e-07	2.28329e-06	0.0284835	0.479991	0.482308
H14	0.018931	0.0210392	0.00123601	0.00794548	0.455566	0.00329081	0.0169033	0.000342057	0.00395096	6.33635e-05	0.000259866	0.00157726	0.0045219	0.377003	0.0139772	0.000157809	0.00264236	0.00463045	9.94334e-05	0.000294571	6.46199e-05	5.00961e-05	1.16564e-05	6.62879e-06	6.76134e-05	0.00132288	0.000145374
H15	0.0223182	0.00176372	0.000455904	0.00369414	0.462612	0.00470721	0.0196638	0.000979206	0.00842669	0.000554296	0.000135774	0.000810501	0.00322448	0.0139772	0.391338	0.000206588	0.000252045	0.0016323	1.77694e-05	0.000526359	2.453e-05	7.73642e-06	2.63906e-05	6.36518e-05	3.79341e-05	0.000168706	0.00178544
H16	0.0244459	0.00405363	0.000412165	0.0057575	0.00330459	0.453131	0.0103652	0.0180868	0.0095968	0.00920887	6.53131e-05	4.22736e-05	4.00223e-05	0.000157809	0.000206588	0.372263	0.0141654	0.000285134	0.00121597	0.000195789	2.43076e-05	3.33052e-06	0.000461791	0.000719485	8.2843e-06	2.44652e-06	3.59838e-06
H17	0.0199732	0.00589671	0.000813387	0.00848604	0.00321236	0.463764	0.000415027	0.0177509	0.000395253	0.00631127	3.50392e-05	6.57982e-06	1.38636e-05	0.00264236	0.000252045	0.0141654	0.399743	5.3593e-05	0.00496562	5.04062e-05	1.7291e-05	1.01646e-05	0.00403867	0.000463988	1.34563e-06	3.61466e-06	1.21625e-06
H18	0.00152418	0.00879366	0.00153841	0.00781489	0.0179149	0.000178388	0.464535	2.34862e-05	0.0283448	9.22567e-06	8.73279e-05	9.2991e-05	0.000100696	0.00463045	0.0016323	0.000285134	5.3593e-05	0.37966	3.36002e-06	0.00343646	3.36407e-05	7.52071e-06	8.38655e-07	1.36411e-06	2.30966e-05	2.82801e-05	1.19857e-05
H19	0.00210513	0.000115535	2.00704e-05	0.00708244	0.00021616	0.019001	2.97228e-05	0.469199	1.27596e-05	0.0283166	6.34474e-07	7.77307e-07	1.58721e-06	9.94334e-05	1.77694e-05	0.00121597	0.00496562	3.36002e-06	0.391931	4.89047e-07	4.31641e-07	1.98791e-07	0.00660235	0.00358526	6.75066e-08	1.82495e-07	2.62125e-07
H20	0.00121388	0.0292774	0.00774721	0.000228146	0.00538244	0.000120049	0.0259569	1.45294e-05	0.46766	2.46532e-05	0.000330184	0.00021947	7.90586e-05	0.000294571	0.000526359	0.000195789	5.04062e-05	0.00343646	4.89047e-07	0.379636	1.93908e-05	0.000159405	1.08574e-06	1.03569e-06	0.000150879	2.32998e-05	7.28597e-06
H21	2.95029e-05	0.00852887	0.0269764	9.50459e-06	8.18116e-05	1.54217e-05	0.000620631	1.7305e-06	0.000395095	3.30535e-07	0.462568	0.0193436	0.0098823	6.46199e-05	2.453e-05	2.43076e-05	1.7291e-05	3.36407e-05	4.31641e-07	1.93908e-05	0.394657	0.0145837	1.21915e-07	5.01521e-08	0.00124505	0.00050094	0.000779288
H22	9.4758e-06	0.00539099	0.0295525	3.31088e-06	2.56629e-05	5.71903e-06	0.000104951	8.16436e-07	0.000355335	6.88898e-07	0.463976	0.0185331	0.00645465	5.00961e-05	7.73642e-06	3.33052e-06	1.01646e-05	7.52071e-06	1.98791e-07	0.000159405	0.0145837	0.396043	6.29758e-08	5.38837e-08	0.00520173	0.00441441	0.000474887
H23	0.000734347	2.61506e-05	5.6723e-06	0.000422962	0.000109574	0.00636164	2.21347e-05	0.0307738	2.96679e-05	0.481948	3.00989e-07	6.47325e-07	9.5668e-07	1.16564e-05	2.63906e-05	0.000461791	0.00403867	8.38655e-07	0.00660235	1.08574e-06	1.21915e-07	6.29758e-08	0.416536	0.0169514	9.04542e-08	5.721e-08	3.99247e-07
H24	0.000977691	1.69596e-05	3.82658e-06	0.000209635	0.00024025	0.00641866	5.57194e-05	0.0302824	4.52795e-05	0.483556	2.71695e-07	1.30686e-06	2.28329e-06	6.62879e-06	6.36518e-05	0.000719485	0.000463988	1.36411e-06	0.00358526	1.03569e-06	5.01521e-08	5.38837e-08	0.0169514	0.409133	1.31942e-07	7.86214e-08	1.05028e-06
H25	4.03881e-05	0.000566842	0.00669151	1.44129e-05	9.64507e-05	8.11524e-06	0.000755417	1.06052e-06	0.00177026	2.39196e-06	0.0196602	0.471413	0.0284835	6.76134e-05	3.79341e-05	8.2843e-06	1.34563e-06	2.30966e-05	6.75066e-08	0.000150879	0.00124505	0.00520173	9.04542e-08	1.31942e-07	0.40765	0.00672411	0.00360668
H26	8.06343e-05	0.00125037	0.00126523	6.63978e-05	0.000746829	5.66239e-06	0.000226434	8.71236e-07	0.000172125	7.9192e-07	0.00640218	0.0301354	0.479991	0.00132288	0.000168706	2.44652e-06	3.61466e-06	2.82801e-05	1.82495e-07	2.32998e-05	0.00050094	0.00441441	5.721e-08	7.86214e-08	0.00672411	0.412898	0.0168868
H27	0.000148747	0.000266618	0.00150495	4.18102e-05	0.001296	4.5944e-05	0.000376903	1.40447e-05	0.00017422	6.6966e-06	0.0062646	0.0299991	0.482308	0.000145374	0.00178544	3.59838e-06	1.21625e-06	1.19857e-05	2.62125e-07	7.28597e-06	0.000779288	0.000474887	3.99247e-07	1.05028e-06	0.00360668	0.0168868	0.410021
LDM — ajoene_z_44_LIDI_matrix
	S1	S2	S3	O4	C5	C6	C7	C8	C9	C10	C11	C12	C13	H14	H15	H16	H17	H18	H19	H20	H21	H22	H23	H24	H25	H26	H27
S1	12.9167	0.00378332	0.00117417	0.685031	0.465789	0.462833	0.0317945	0.0274804	0.0161779	0.0168029	0.000111298	0.000596384	0.0010842	0.0236756	0.0189015	0.0198864	0.022629	0.00156903	0.00208233	0.000885029	1.06306e-05	3.19526e-05	0.0013095	0.000756222	5.31839e-05	8.60767e-05	0.000414067		92.2933	31.7079
S2	0.00378332	14.5417	0.646721	0.00126399	0.017696	0.00038573	0.0554537	8.95215e-05	0.572154	0.000143189	0.038293	0.011241	0.00621986	0.00173305	0.0226396	0.000108181	8.11782e-05	0.00887951	1.05015e-05	0.0294182	0.00536557	0.00860353	6.71442e-06	1.01413e-05	0.00057043	0.00108113	0.000252163
S3	0.00117417	0.646721	14.6414	0.000391131	0.00195058	0.000101597	0.0169293	1.8726e-05	0.0435417	5.218e-05	0.529985	0.0378623	0.0197146	0.000462063	0.00131466	1.45362e-05	3.56758e-05	0.00155904	1.71168e-06	0.00717029	0.0296206	0.0270496	2.26447e-06	5.30572e-06	0.00678135	0.00126339	0.0014868
O4	0.685031	0.00126399	0.000391131	8.36975	0.0625708	0.0620514	0.010129	0.0131448	0.00291711	0.00320106	3.53048e-05	0.000266223	0.000470533	0.00565059	0.00791849	0.00850003	0.00380832	0.00524346	0.0106439	0.000151769	3.63363e-06	1.37991e-05	0.000297679	0.000481827	1.60033e-05	5.77956e-05	0.00011209
C5	0.465789	0.017696	0.00195058	0.0625708	4.07318	0.0247916	0.518194	0.00922045	0.0345156	0.00521067	0.000288917	0.00299323	0.00813474	0.450732	0.452849	0.00361781	0.00472506	0.0181426	0.000253692	0.00542101	2.80853e-05	0.00010063	0.000166569	0.000324793	0.000120093	0.000801898	0.00163395
C6	0.462833	0.00038573	0.000101597	0.0620514	0.0247916	4.06911	0.00499232	0.518237	0.00193495	0.0371944	1.20068e-05	1.95669e-05	4.44167e-05	0.00333842	0.00353453	0.466278	0.464492	0.000208919	0.0186746	0.000237017	1.75715e-06	4.09897e-06	0.00635713	0.00627124	4.03373e-06	1.94335e-05	3.61439e-05
C7	0.0317945	0.0554537	0.0169293	0.010129	0.518194	0.00499232	3.95057	0.00100595	0.880581	0.000531694	0.00147301	0.00477914	0.00428558	0.0184737	0.01691	0.000370996	0.00102323	0.466817	2.51522e-05	0.0262239	0.000103847	0.000617117	1.81515e-05	4.08687e-05	0.000945572	0.000230502	0.000328148
C8	0.0274804	8.95215e-05	1.8726e-05	0.0131448	0.00922045	0.518237	0.00100595	3.97356	0.00037319	0.915249	4.85201e-06	2.12066e-05	0.000185439	0.0124209	0.000570608	0.0179647	0.0192802	3.36089e-05	0.466023	4.78708e-05	4.57074e-07	1.1336e-06	0.030055	0.0306207	1.40038e-06	0.000104343	0.000293825
C9	0.0161779	0.572154	0.0435417	0.00291711	0.0345156	0.00193495	0.880581	0.00037319	4.09207	0.000735406	0.00219535	0.00725469	0.00340515	0.00780223	0.00435914	7.29311e-05	0.000550295	0.0286896	1.72458e-05	0.468155	0.000363075	0.000407249	2.71634e-05	2.6849e-05	0.00189661	0.000167243	0.000156519
C10	0.0168029	0.000143189	5.218e-05	0.00320106	0.00521067	0.0371944	0.000531694	0.915249	0.000735406	4.08344	2.55046e-05	0.000122532	0.000698473	0.00936527	0.00050615	0.00595559	0.0100195	2.33938e-05	0.0277485	3.55743e-05	1.56292e-06	4.16124e-06	0.483405	0.481729	6.89929e-06	0.000381029	0.000682789
C11	0.000111298	0.038293	0.529985	3.53048e-05	0.000288917	1.20068e-05	0.00147301	4.85201e-06	0.00219535	2.55046e-05	4.01134	0.516426	0.0367931	0.0001412	0.000314988	2.48458e-06	4.27364e-06	8.81113e-05	3.72319e-07	0.000331518	0.464177	0.462504	1.33836e-06	4.15502e-06	0.0195477	0.00645164	0.00623565
C12	0.000596384	0.011241	0.0378623	0.000266223	0.00299323	1.95669e-05	0.00477914	2.12066e-05	0.00725469	0.000122532	0.516426	3.96116	0.910883	0.000869595	0.00231204	4.88668e-06	4.87026e-06	0.00010232	1.03899e-06	0.000188972	0.0185594	0.019448	2.55315e-06	7.95245e-05	0.471241	0.0301382	0.0297438
C13	0.0010842	0.00621986	0.0197146	0.000470533	0.00813474	4.44167e-05	0.00428558	0.000185439	0.00340515	0.000698473	0.0367931	0.910883	4.07264	0.00371936	0.00630917	2.21583e-05	1.11708e-05	0.000109674	8.71357e-06	7.50327e-05	0.00651765	0.0100452	1.82361e-05	0.000393141	0.0284186	0.47988	0.481367
H14	0.0236756	0.00173305	0.000462063	0.00565059	0.450732	0.00333842	0.0184737	0.0124209	0.00780223	0.00936527	0.0001412	0.000869595	0.00371936	0.368403	0.0131648	0.000170546	0.000224819	0.00168634	0.000547926	0.000482509	8.08772e-06	2.49763e-05	0.000243155	0.000350843	4.06169e-05	0.000167646	0.00226175
H15	0.0189015	0.0226396	0.00131466	0.00791849	0.452849	0.00353453	0.01691	0.000570608	0.00435914	0.00050615	0.000314988	0.00231204	0.00630917	0.0131648	0.375386	0.00297596	0.000285775	0.00457188	8.14844e-05	0.000326219	6.0358e-05	8.36446e-05	2.3092e-05	0.000214603	8.69302e-05	0.00159934	0.000214721
H16	0.0198864	0.000108181	1.45362e-05	0.00850003	0.00361781	0.466278	0.000370996	0.0179647	7.29311e-05	0.00595559	2.48458e-06	4.88668e-06	2.21583e-05	0.000170546	0.00297596	0.40258	0.0148988	0.000103116	0.00503616	9.3823e-06	5.80456e-07	3.88812e-07	0.000445588	0.00388443	1.18305e-06	2.33641e-05	2.69337e-06
H17	0.022629	8.11782e-05	3.56758e-05	0.00380832	0.00472506	0.464492	0.00102323	0.0192802	0.000550295	0.0100195	4.27364e-06	4.87026e-06	1.11708e-05	0.000224819	0.000285775	0.0148988	0.391561	2.1323e-05	0.00109835	6.31168e-05	4.4847e-07	1.33806e-06	0.000779644	0.000478354	1.04953e-06	2.48599e-06	8.3952e-06
H18	0.00156903	0.00887951	0.00155904	0.00524346	0.0181426	0.000208919	0.466817	3.36089e-05	0.0286896	2.33938e-05	8.81113e-05	0.00010232	0.000109674	0.00168634	0.00457188	0.000103116	2.1323e-05	0.386003	3.08457e-06	0.00346171	7.85673e-06	3.43678e-05	1.04644e-06	7.56985e-06	2.84657e-05	3.22154e-05	1.05578e-05
H19	0.00208233	1.05015e-05	1.71168e-06	0.0106439	0.000253692	0.0186746	2.51522e-05	0.466023	1.72458e-05	0.0277485	3.72319e-07	1.03899e-06	8.71357e-06	0.000547926	8.14844e-05	0.00503616	0.00109835	3.08457e-06	0.383186	1.4851e-06	4.831e-08	8.3641e-08	0.00353388	0.00650527	1.22431e-07	2.05471e-05	9.09085e-06
H20	0.000885029	0.0294182	0.00717029	0.000151769	0.00542101	0.000237017	0.0262239	4.78708e-05	0.468155	3.55743e-05	0.000331518	0.000188972	7.50327e-05	0.000482509	0.000326219	9.3823e-06	6.31168e-05	0.00346171	1.4851e-06	0.380979	0.000153893	2.18369e-05	9.94885e-07	1.45431e-06	0.000123186	2.21061e-05	6.95337e-06
H21	1.06306e-05	0.00536557	0.0296206	3.63363e-06	2.80853e-05	1.75715e-06	0.000103847	4.57074e-07	0.000363075	1.56292e-06	0.464177	0.0185594	0.00651765	8.08772e-06	6.0358e-05	5.80456e-07	4.4847e-07	7.85673e-06	4.831e-08	0.000153893	0.397198	0.0146284	7.19145e-08	1.83427e-06	0.00520986	0.00449313	0.000480101
H22	3.19526e-05	0.00860353	0.0270496	1.37991e-05	0.00010063	4.09897e-06	0.000617117	1.1336e-06	0.000407249	4.16124e-06	0.462504	0.019448	0.0100452	2.49763e-05	8.36446e-05	3.88812e-07	1.33806e-06	3.43678e-05	8.3641e-08	2.18369e-05	0.0146284	0.394964	2.20411e-07	7.65125e-07	0.00120046	0.000504529	0.00077436
H23	0.0013095	6.71442e-06	2.26447e-06	0.000297679	0.000166569	0.00635713	1.81515e-05	0.030055	2.71634e-05	0.483405	1.33836e-06	2.55315e-06	1.82361e-05	0.000243155	2.3092e-05	0.000445588	0.000779644	1.04644e-06	0.00353388	9.94885e-07	7.19145e-08	2.20411e-07	0.408605	0.0170225	3.94507e-07	2.30352e-05	4.64529e-05
H24	0.000756222	1.01413e-05	5.30572e-06	0.000481827	0.000324793	0.00627124	4.08687e-05	0.0306207	2.6849e-05	0.481729	4.15502e-06	7.95245e-05	0.000393141	0.000350843	0.000214603	0.00388443	0.000478354	7.56985e-06	0.00650527	1.45431e-06	1.83427e-06	7.65125e-07	0.0170225	0.417649	1.77832e-05	0.000445574	7.86273e-05
H25	5.31839e-05	0.00057043	0.00678135	1.60033e-05	0.000120093	4.03373e-06	0.000945572	1.40038e-06	0.00189661	6.89929e-06	0.0195477	0.471241	0.0284186	4.06169e-05	8.69302e-05	1.18305e-06	1.04953e-06	2.84657e-05	1.22431e-07	0.000123186	0.00520986	0.00120046	3.94507e-07	1.77832e-05	0.407063	0.00673399	0.00358251
H26	8.60767e-05	0.00108113	0.00126339	5.77956e-05	0.000801898	1.94335e-05	0.000230502	0.000104343	0.000167243	0.000381029	0.00645164	0.0301382	0.47988	0.000167646	0.00159934	2.33641e-05	2.48599e-06	3.22154e-05	2.05471e-05	2.21061e-05	0.00449313	0.000504529	2.30352e-05	0.000445574	0.00673399	0.414979	0.0169017
H27	0.000414067	0.000252163	0.0014868	0.00011209	0.00163395	3.61439e-05	0.000328148	0.000293825	0.000156519	0.000682789	0.00623565	0.0297438	0.481367	0.00226175	0.000214721	2.69337e-06	8.3952e-06	1.05578e-05	9.09085e-06	6.95337e-06	0.000480101	0.00077436	4.64529e-05	7.86273e-05	0.00358251	0.0169017	0.408175
LDM — ajoene_z_45_LIDI_matrix
	S1	S2	S3	O4	C5	C6	C7	C8	C9	C10	C11	C12	C13	H14	H15	H16	H17	H18	H19	H20	H21	H22	H23	H24	H25	H26	H27
S1	12.9305	0.00264288	0.000445954	0.685089	0.465331	0.466339	0.028227	0.0282173	0.0133494	0.0143939	6.10943e-05	2.81958e-05	2.11055e-05	0.0229195	0.0190585	0.0227117	0.0236164	0.00342252	0.00453735	0.00120328	1.18478e-05	3.07251e-05	0.000794186	0.000927109	8.30652e-05	2.25324e-06	1.04633e-06		92.2823	31.7173
S2	0.00264288	14.5174	0.652241	0.0014997	0.0153945	0.000610376	0.0626002	0.00303596	0.572412	0.0125362	0.0380375	0.00636852	0.00159676	0.00183637	0.0148994	0.00011066	0.00071439	0.00879036	0.000264098	0.0275389	0.00841043	0.00801375	0.0143982	0.000654318	0.00569294	0.000320307	0.000168259
S3	0.000445954	0.652241	14.6276	0.000435529	0.00175264	6.60577e-05	0.0106557	0.0003643	0.0412204	0.000920002	0.528166	0.0408959	0.0218916	0.000223574	0.00158329	1.37405e-05	7.40514e-05	0.00137588	2.44285e-05	0.0131885	0.0301682	0.025912	0.000600552	3.54235e-05	0.00250209	0.0010031	0.00148821
O4	0.685089	0.0014997	0.000435529	8.36735	0.0618773	0.0626447	0.0149298	0.00943613	0.00274489	0.00525386	1.8175e-05	7.55436e-06	5.30645e-06	0.00386971	0.00804441	0.00582685	0.00484073	0.015859	0.000760359	0.000303872	4.11612e-06	1.18999e-05	0.000291321	0.000600205	1.66539e-05	6.55836e-07	4.76853e-07
C5	0.465331	0.0153945	0.00175264	0.0618773	4.0742	0.0235624	0.517016	0.00676426	0.0348428	0.00410708	0.00012122	8.91247e-05	4.00563e-05	0.462943	0.457706	0.00464194	0.00340865	0.0175163	0.000314007	0.00545641	2.95871e-05	3.69301e-05	0.000231171	0.000111043	0.000229458	5.23427e-06	2.12438e-06
C6	0.466339	0.000610376	6.60577e-05	0.0626447	0.0235624	4.07281	0.00858097	0.520247	0.00323667	0.037148	1.56508e-05	1.41693e-05	7.32964e-06	0.00504562	0.00193567	0.462805	0.456612	0.000412167	0.0199012	0.00010655	2.13516e-06	6.13549e-06	0.00587079	0.0063317	3.32551e-05	9.98156e-07	4.09202e-07
C7	0.028227	0.0626002	0.0106557	0.0149298	0.517016	0.00858097	3.96513	0.000849271	0.879618	0.000826708	0.00171711	0.00155605	0.000619626	0.0196618	0.0166961	0.000714669	0.0113775	0.458361	0.000177365	0.0249688	0.000210202	0.000642981	0.000876362	5.62421e-05	0.00397794	9.33117e-05	3.42739e-05
C8	0.0282173	0.00303596	0.0003643	0.00943613	0.00676426	0.520247	0.000849271	3.98574	0.000442084	0.915657	5.00298e-05	4.61595e-06	3.35195e-06	0.000745138	0.00824393	0.0188853	0.0172747	0.00011198	0.474182	1.24044e-05	4.39867e-06	1.87897e-05	0.0289335	0.030075	4.32944e-06	5.80669e-07	5.30549e-07
C9	0.0133494	0.572412	0.0412204	0.00274489	0.0348428	0.00323667	0.879618	0.000442084	4.10526	0.00139757	0.00205008	0.00603039	0.00101733	0.0104236	0.00368526	0.000241095	0.0058589	0.0278653	0.000147376	0.463525	0.000319139	0.000436623	0.00198184	0.000130962	0.00951471	0.000180131	8.11132e-05
C10	0.0143939	0.0125362	0.000920002	0.00525386	0.00410708	0.037148	0.000826708	0.915657	0.00139757	4.0768	0.000150556	1.47392e-05	8.51563e-06	0.000311152	0.00664285	0.00994082	0.00579324	7.23134e-05	0.0297031	5.40004e-05	1.21823e-05	4.70299e-05	0.472993	0.482894	1.24592e-05	1.64403e-06	1.42449e-06
C11	6.10943e-05	0.0380375	0.528166	1.8175e-05	0.00012122	1.56508e-05	0.00171711	5.00298e-05	0.00205008	0.000150556	4.01304	0.516028	0.037136	6.11824e-05	7.29703e-05	2.51074e-06	2.30023e-05	9.92279e-05	4.32581e-06	0.000347537	0.463261	0.46371	0.000229413	6.82187e-06	0.0190159	0.00636157	0.00632703
C12	2.81958e-05	0.00636852	0.0408959	7.55436e-06	8.91247e-05	1.41693e-05	0.00155605	4.61595e-06	0.00603039	1.47392e-05	0.516028	3.97492	0.922846	7.23802e-05	1.18404e-05	1.05935e-06	1.79351e-05	5.62136e-05	1.32904e-06	0.0013789	0.0191433	0.0182294	2.06861e-05	9.10143e-07	0.466976	0.0306054	0.0303169
C13	2.11055e-05	0.00159676	0.0218916	5.30645e-06	4.00563e-05	7.32964e-06	0.000619626	3.35195e-06	0.00101733	8.51563e-06	0.037136	0.922846	4.08256	3.38009e-05	4.91518e-06	6.3885e-07	8.62365e-06	3.53609e-05	3.55901e-07	0.000504691	0.00894785	0.00651671	1.26537e-05	3.88704e-07	0.0285883	0.481568	0.483597
H14	0.0229195	0.00183637	0.000223574	0.00386971	0.462943	0.00504562	0.0196618	0.000745138	0.0104236	0.000311152	6.11824e-05	7.23802e-05	3.38009e-05	0.389088	0.0142532	0.000987572	0.000256412	0.000713066	1.70713e-05	0.000534384	9.59187e-06	2.00533e-05	2.80085e-05	7.74545e-06	0.00013371	6.31959e-06	2.16695e-06
H15	0.0190585	0.0148994	0.00158329	0.00804441	0.457706	0.00193567	0.0166961	0.00824393	0.00368526	0.00664285	7.29703e-05	1.18404e-05	4.91518e-06	0.0142532	0.37697	0.000229818	0.000118493	0.00446557	0.000234785	0.000217953	2.91503e-05	1.7118e-05	0.000300002	0.000158311	1.63337e-05	6.26127e-07	3.48562e-07
H16	0.0227117	0.00011066	1.37405e-05	0.00582685	0.00464194	0.462805	0.000714669	0.0188853	0.000241095	0.00994082	2.51074e-06	1.05935e-06	6.3885e-07	0.000987572	0.000229818	0.388124	0.0140849	2.65242e-05	0.00135521	8.22628e-06	2.94433e-07	1.06634e-06	0.00047582	0.000784939	3.88241e-06	8.18312e-08	3.09627e-08
H17	0.0236164	0.00071439	7.40514e-05	0.00484073	0.00340865	0.456612	0.0113775	0.0172747	0.0058589	0.00579324	2.30023e-05	1.79351e-05	8.62365e-06	0.000256412	0.000118493	0.0140849	0.37852	0.000929361	0.0049507	0.000144676	2.65815e-06	8.88027e-06	0.0034365	0.000408796	3.8395e-05	1.27264e-06	4.48877e-07
H18	0.00342252	0.00879036	0.00137588	0.015859	0.0175163	0.000412167	0.458361	0.00011198	0.0278653	7.23134e-05	9.92279e-05	5.62136e-05	3.53609e-05	0.000713066	0.00446557	2.65242e-05	0.000929361	0.36488	2.58985e-05	0.00345266	1.0728e-05	3.87153e-05	2.84491e-05	4.3691e-06	9.75633e-05	3.29682e-06	2.20748e-06
H19	0.00453735	0.000264098	2.44285e-05	0.000760359	0.000314007	0.0199012	0.000177365	0.474182	0.000147376	0.0297031	4.32581e-06	1.32904e-06	3.55901e-07	1.70713e-05	0.000234785	0.00135521	0.0049507	2.58985e-05	0.41151	5.21673e-06	4.05827e-07	1.38939e-06	0.00651689	0.00371187	1.81786e-06	1.05502e-07	6.87598e-08
H20	0.00120328	0.0275389	0.0131885	0.000303872	0.00545641	0.00010655	0.0249688	1.24044e-05	0.463525	5.40004e-05	0.000347537	0.0013789	0.000504691	0.000534384	0.000217953	8.22628e-06	0.000144676	0.00345266	5.21673e-06	0.36919	0.000189038	2.71659e-05	3.82145e-05	6.12638e-06	0.000740888	1.98842e-05	1.88533e-05
H21	1.18478e-05	0.00841043	0.0301682	4.11612e-06	2.95871e-05	2.13516e-06	0.000210202	4.39867e-06	0.000319139	1.21823e-05	0.463261	0.0191433	0.00894785	9.59187e-06	2.91503e-05	2.94433e-07	2.65815e-06	1.0728e-05	4.05827e-07	0.000189038	0.389885	0.0144321	1.38792e-05	6.62772e-07	0.00124831	0.00045196	0.00078704
H22	3.07251e-05	0.00801375	0.025912	1.18999e-05	3.69301e-05	6.13549e-06	0.000642981	1.87897e-05	0.000436623	4.70299e-05	0.46371	0.0182294	0.00651671	2.00533e-05	1.7118e-05	1.06634e-06	8.88027e-06	3.87153e-05	1.38939e-06	2.71659e-05	0.0144321	0.398115	4.99177e-05	2.15151e-06	0.00492878	0.00429271	0.000485502
H23	0.000794186	0.0143982	0.000600552	0.000291321	0.000231171	0.00587079	0.000876362	0.0289335	0.00198184	0.472993	0.000229413	2.06861e-05	1.26537e-05	2.80085e-05	0.000300002	0.00047582	0.0034365	2.84491e-05	0.00651689	3.82145e-05	1.38792e-05	4.99177e-05	0.392752	0.0161543	2.10383e-05	2.46679e-06	2.01456e-06
H24	0.000927109	0.000654318	3.54235e-05	0.000600205	0.000111043	0.0063317	5.62421e-05	0.030075	0.000130962	0.482894	6.82187e-06	9.10143e-07	3.88704e-07	7.74545e-06	0.000158311	0.000784939	0.000408796	4.3691e-06	0.00371187	6.12638e-06	6.62772e-07	2.15151e-06	0.0161543	0.407349	9.96708e-07	8.45527e-08	6.81361e-08
H25	8.30652e-05	0.00569294	0.00250209	1.66539e-05	0.000229458	3.32551e-05	0.00397794	4.32944e-06	0.00951471	1.24592e-05	0.0190159	0.466976	0.0285883	0.00013371	1.63337e-05	3.88241e-06	3.8395e-05	9.75633e-05	1.81786e-06	0.000740888	0.00124831	0.00492878	2.10383e-05	9.96708e-07	0.397595	0.00652382	0.00358065
H26	2.25324e-06	0.000320307	0.0010031	6.55836e-07	5.23427e-06	9.98156e-07	9.33117e-05	5.80669e-07	0.000180131	1.64403e-06	0.00636157	0.0306054	0.481568	6.31959e-06	6.26127e-07	8.18312e-08	1.27264e-06	3.29682e-06	1.05502e-07	1.98842e-05	0.00045196	0.00429271	2.46679e-06	8.45527e-08	0.00652382	0.415633	0.0169096
H27	1.04633e-06	0.000168259	0.00148821	4.76853e-07	2.12438e-06	4.09202e-07	3.42739e-05	5.30549e-07	8.11132e-05	1.42449e-06	0.00632703	0.0303169	0.483597	2.16695e-06	3.48562e-07	3.09627e-08	4.48877e-07	2.20748e-06	6.87598e-08	1.88533e-05	0.00078704	0.000485502	2.01456e-06	6.81361e-08	0.00358065	0.0169096	0.409363
LDM — ajoene_z_46_LIDI_matrix
	S1	S2	S3	O4	C5	C6	C7	C8	C9	C10	C11	C12	C13	H14	H15	H16	H17	H18	H19	H20	H21	H22	H23	H24	H25	H26	H27
S1	12.8864	0.00234111	0.00126294	0.683374	0.462849	0.462837	0.0319504	0.0315968	0.0145449	0.0168416	0.00180843	0.000963491	0.00879074	0.0245538	0.0179592	0.0249772	0.0187229	0.00244752	0.0019172	0.000662423	0.00507226	0.000137643	0.00093662	0.00068333	0.000419775	0.0199321	0.000679713		92.279	31.7211
S2	0.00234111	14.5435	0.642882	0.00116407	0.0182834	0.000303515	0.0541829	6.3575e-05	0.571522	8.45171e-05	0.0382547	0.0142877	0.00750225	0.00132787	0.0232059	3.40367e-05	6.69053e-05	0.00878954	4.00701e-06	0.0293938	0.00382713	0.00904082	6.11312e-06	6.89849e-06	0.000708582	0.000335711	0.000256048
S3	0.00126294	0.642882	14.6332	0.000269074	0.00190513	0.000156386	0.0195808	3.31465e-05	0.0457105	6.11525e-05	0.531801	0.0393486	0.0186603	0.000572647	0.00141586	1.78319e-05	7.52179e-05	0.00152891	1.71977e-06	0.00675314	0.0282699	0.0271108	3.53909e-06	1.08927e-05	0.00878589	0.00116599	0.00155609
O4	0.683374	0.00116407	0.000269074	8.373	0.0624269	0.0622629	0.0097231	0.0086885	0.00238925	0.0028337	0.000209911	0.000135075	0.00138149	0.00625639	0.0075894	0.00676109	0.00824921	0.00733544	0.00548695	0.000126333	0.000627117	2.08668e-05	0.000202917	0.000368439	8.62635e-05	0.00238287	0.000138962
C5	0.462849	0.0182834	0.00190513	0.0624269	4.07757	0.0260947	0.518426	0.00490275	0.0346404	0.00221703	0.000365427	0.000561398	0.0019611	0.46048	0.453602	0.00494187	0.00426537	0.0180531	0.000212408	0.00548408	0.000537606	4.62708e-05	0.000228574	0.000108129	3.76648e-05	0.00147442	4.55373e-05
C6	0.462837	0.000303515	0.000156386	0.0622629	0.0260947	4.06804	0.00483578	0.517825	0.00206122	0.0381495	0.000103089	0.000337582	0.00207574	0.00525997	0.00372057	0.46098	0.462242	0.000228046	0.0190553	0.000194283	0.000338539	2.08937e-05	0.00639473	0.00627218	5.30485e-05	0.00319868	0.000223196
[truncated: 4,980 more rows]

## Sheet: Weighted_LDM
Weighted LDM — ajoene_z_1_LIDI_matrix (× 0.183991)
[truncated: 6,263 more rows]

[truncated: 1 more sheets: FD]
