# Supplementary material for: Comparative Analysis of Molecular Conformers Using Localization–Delocalization Matrices and Frobenius Distance
Source: Research Square preprint supplement (doi:10.21203/rs.3.rs-7999250/v1), 2025-11-18
Supplement: Supplementary file 7 [file de92ab5933c0a6745a58776f.xlsx]

## Sheet: Boltzman_distribution
Conformer ID	E (HF)	Delta E(HF)	HF Conversion	Boltzman distribution	Boltzman's weight	% (percentage)	Conformer_type	FD_R	FD_W	Nloc	Ndeloc
1	-1429.21	0	0	1	0.21767	0.21767	Acyclic	0	0.028397	71.9514	22.0485
2	-1429.21	0.000159	0.099773	0.845881	0.184123	0.184123	Acyclic	0.0577636	0.035541	71.9672	22.0322
3	-1429.21	0.000393	0.246609	0.661197	0.143923	0.143923	Acyclic	0.0424258	0.028646	71.959	22.041
4	-1429.21	0.001441	0.904232	0.219388	0.0477542	0.0477542	3 RCP	0.0568357	0.041816	71.951	22.0494
5	-1429.21	0.001562	0.98016	0.19315	0.042043	0.042043	Acyclic	0.0499636	0.030922	71.9967	22.0031
6	-1429.21	0.001652	1.03663	0.175691	0.0382427	0.0382427	Acyclic	0.0518582	0.034412	71.9968	22.0032
7	-1429.21	0.00168	1.05421	0.170588	0.0371319	0.0371319	Acyclic	0.0421246	0.033606	71.9968	22.0032
8	-1429.21	0.00171	1.07303	0.165285	0.0359776	0.0359776	Acyclic	0.0566772	0.044075	71.9861	22.0138
9	-1429.21	0.001855	1.16402	0.141887	0.0308846	0.0308846	Acyclic	0.0477242	0.037059	71.9837	22.0146
10	-1429.21	0.001943	1.21924	0.129334	0.0281521	0.0281521	Acyclic	0.0480785	0.039663	71.9879	22.012
11	-1429.21	0.001994	1.25124	0.122573	0.0266806	0.0266806	1 RCP	0.0440467	0.038696	71.9879	22.0128
12	-1429.21	0.00225	1.41188	0.0936181	0.0203779	0.0203779	1 RCP	0.0551747	0.047968	71.9753	22.0255
13	-1429.21	0.002318	1.45455	0.0871509	0.0189701	0.0189701	4 RCP	0.058415	0.048677	71.9754	22.0264
14	-1429.21	0.002383	1.49534	0.0813871	0.0177155	0.0177155	1 RCP	0.0704402	0.044812	71.9687	22.0309
15	-1429.21	0.002443	1.53299	0.0764056	0.0166312	0.0166312	3 RCP	0.0504965	0.041436	71.9687	22.0309
16	-1429.21	0.002978	1.8687	0.0435048	0.0094697	0.0094697	Acyclic	0.0592391	0.046657	71.9746	22.0249
17	-1429.21	0.003085	1.93585	0.0388705	0.00846094	0.00846094	Acyclic	0.0601676	0.046824	71.9515	22.0485
18	-1429.21	0.003138	1.9691	0.0367612	0.00800181	0.00800181	Acyclic	0.0712909	0.063953	71.9651	22.0345
19	-1429.21	0.003167	1.9873	0.0356559	0.00776123	0.00776123	Acyclic	0.0615066	0.037251	71.9712	22.0305
20	-1429.21	0.003167	1.9873	0.0356559	0.00776123	0.00776123	Acyclic	0.0590111	0.044039	72.0246	21.9746
21	-1429.21	0.003244	2.03562	0.0328798	0.00715695	0.00715695	Acyclic	0.0622412	0.047268	72.0258	21.9732
22	-1429.21	0.003286	2.06197	0.0314578	0.00684742	0.00684742	Acyclic	0.0633852	0.060859	71.9609	22.0387
23	-1429.21	0.003301	2.07139	0.030965	0.00674014	0.00674014	1 RCP	0.048706	0.050634	72.0261	21.9723
24	-1429.21	0.003445	2.16175	0.0266095	0.0057921	0.0057921	1 RCP	0.0574657	0.046361	72.0136	21.9876
25	-1429.21	0.003613	2.26717	0.0222963	0.00485323	0.00485323	1 RCP	0.0593601	0.049653	72.014	21.9861
26	-1429.21	0.003744	2.34937	0.0194242	0.00422806	0.00422806	1 RCP	0.0614276	0.050554	72.0009	22
27	-1429.21	0.003919	2.45918	0.0161561	0.0035167	0.0035167	2 RCP	0.0608171	0.034649	71.9773	22.0223
28	-1429.21	0.004203	2.6374	0.0119812	0.00260795	0.00260795	1 RCP	0.0520196	0.050395	72.0053	21.9951
29	-1429.21	0.004255	2.67003	0.011343	0.00246903	0.00246903	Acyclic	0.0664942	0.051667	72.0065	21.9929
30	-1429.21	0.004565	2.86455	0.00818471	0.00178157	0.00178157	Acyclic	0.0737361	0.051893	71.9939	22.0051
31	-1429.21	0.004655	2.92103	0.00744488	0.00162053	0.00162053	Acyclic	0.0762336	0.054891	71.986	22.013
32	-1429.21	0.004711	2.95617	0.00701869	0.00152776	0.00152776	1 RCP	0.0515163	0.044674	72.0028	21.9949
33	-1429.21	0.0048	3.01201	0.00639098	0.00139112	0.00139112	1 RCP	0.0530899	0.05395	71.9739	22.0261
34	-1429.2	0.005568	3.49394	0.00284746	0.000619808	0.000619808	1 RCP	0.0553829	0.064892	71.9895	22.0091
35	-1429.2	0.005604	3.51653	0.00274157	0.000596759	0.000596759	1 RCP	0.0551234	0.067071	71.9904	22.0087
36	-1429.2	0.005737	3.59998	0.00238339	0.000518794	0.000518794	1 RCP	0.0547512	0.045292	72.0073	21.9927
					1	1				71.9757	22.0242

## Sheet: LDM
LDM — diallyl_trisulfide_1_LIDI_matrix
	S1	S2	S3	C4	C5	C6	C7	C8	C9	H10	H11	H12	H13	H14	H15	H16	H17	H18	H19		Nloc	Ndeloc
S1	14.6093	0.0752902	0.651023	0.527515	0.0032836	0.0388879	0.0109714	0.0216744	0.00908262	0.0269272	0.0290763	0.00051514	0.00102328	0.00622198	0.00252935	0.00150643	0.00131165	0.000363614	0.000607856		71.9514	22.0485
S2	0.0752902	14.6092	0.650858	0.00328415	0.52727	0.0109693	0.0388612	0.00908051	0.0216587	0.00102242	0.00051537	0.0290385	0.0269219	0.00253433	0.00621945	0.000608104	0.000363308	0.00131059	0.00150612
S3	0.651023	0.650858	14.5774	0.0381038	0.0380958	0.0121985	0.0121808	0.00968636	0.00967709	0.00833321	0.00638372	0.00638083	0.00833228	0.000620906	0.000618631	0.000328807	0.00252173	0.00252199	0.000328892
C4	0.527515	0.00328415	0.0381038	4.01117	0.000645574	0.516993	0.000440561	0.0368076	0.000726992	0.463981	0.463845	0.000100633	0.000166497	0.0198351	6.79344e-05	0.00628056	0.0063586	5.69843e-05	4.69861e-05
C5	0.0032836	0.52727	0.0380958	0.000645574	4.01097	0.00044039	0.516938	0.000727113	0.0367886	0.00016645	0.000100796	0.463809	0.463968	6.7987e-05	0.0198013	4.70197e-05	5.70282e-05	0.00635876	0.00628038
C6	0.0388879	0.0109693	0.0121985	0.516993	0.00044039	3.96483	8.56791e-05	0.914335	8.68017e-05	0.0192964	0.0183879	0.000136105	2.25421e-05	0.472368	3.02361e-05	0.0302161	0.0299844	9.34171e-06	5.93503e-06
C7	0.0109714	0.0388612	0.0121808	0.000440561	0.516938	8.56791e-05	3.96483	8.68537e-05	0.914351	2.24993e-05	0.000136222	0.0183891	0.0192975	3.0273e-05	0.472368	5.94159e-06	9.3209e-06	0.0299808	0.0302177
C8	0.0216744	0.00908051	0.00968636	0.0368076	0.000727113	0.914335	8.68537e-05	4.07726	0.000153431	0.00934516	0.00635157	0.000124656	2.64062e-05	0.0287315	1.16596e-05	0.483574	0.480344	7.57478e-06	1.10719e-05
C9	0.00908262	0.0216587	0.00967709	0.000726992	0.0367886	8.68017e-05	0.914351	0.000153431	4.07726	2.63559e-05	0.000124696	0.00633701	0.00934482	1.1655e-05	0.0287431	1.108e-05	7.56038e-06	0.480316	0.483602
H10	0.0269272	0.00102242	0.00833321	0.463981	0.00016645	0.0192964	2.24993e-05	0.00934516	2.63559e-05	0.398104	0.0146833	2.45016e-05	4.34202e-05	0.00141689	4.52909e-06	0.000792043	0.000499927	8.08265e-06	1.35087e-06
H11	0.0290763	0.00051537	0.00638372	0.463845	0.000100796	0.0183879	0.000136222	0.00635157	0.000124696	0.0146833	0.395256	6.39698e-06	2.45491e-05	0.00517669	4.12697e-05	0.000460913	0.00426572	5.71353e-06	7.96932e-06
H12	0.00051514	0.0290385	0.00638083	0.000100633	0.463809	0.000136105	0.0183891	0.000124656	0.00633701	2.45016e-05	6.39698e-06	0.395239	0.0146825	4.13476e-05	0.00517633	7.97152e-06	5.70777e-06	0.00426288	0.000460528
H13	0.00102328	0.0269219	0.00833228	0.000166497	0.463968	2.25421e-05	0.0192975	2.64062e-05	0.00934482	4.34202e-05	2.45491e-05	0.0146825	0.398107	4.53086e-06	0.00141698	1.35194e-06	8.09288e-06	0.000499926	0.000792042
H14	0.00622198	0.00253433	0.000620906	0.0198351	6.7987e-05	0.472368	3.0273e-05	0.0287315	1.1655e-05	0.00141689	0.00517669	4.13476e-05	4.53086e-06	0.409909	2.0987e-05	0.00363192	0.00673941	1.77959e-06	8.04473e-07
H15	0.00252935	0.00621945	0.000618631	6.79344e-05	0.0198013	3.02361e-05	0.472368	1.16596e-05	0.0287431	4.52909e-06	4.12697e-05	0.00517633	0.00141698	2.0987e-05	0.409918	8.04204e-07	1.77781e-06	0.00673946	0.00363201
H16	0.00150643	0.000608104	0.000328807	0.00628056	4.70197e-05	0.0302161	5.94159e-06	0.483574	1.108e-05	0.000792043	0.000460913	7.97152e-06	1.35194e-06	0.00363192	8.04204e-07	0.410226	0.0167691	5.36209e-07	9.85947e-07
H17	0.00131165	0.000363308	0.00252173	0.0063586	5.70282e-05	0.0299844	9.3209e-06	0.480344	7.56038e-06	0.000499927	0.00426572	5.70777e-06	8.09288e-06	0.00673941	1.77781e-06	0.0167691	0.411081	1.69315e-06	5.3567e-07
H18	0.000363614	0.00131059	0.00252199	5.69843e-05	0.00635876	9.34171e-06	0.0299808	7.57478e-06	0.480316	8.08265e-06	5.71353e-06	0.00426288	0.000499926	1.77959e-06	0.00673946	5.36209e-07	1.69315e-06	0.411078	0.0167691
H19	0.000607856	0.00150612	0.000328892	4.69861e-05	0.00628038	5.93503e-06	0.0302177	1.10719e-05	0.483602	1.35087e-06	7.96932e-06	0.000460528	0.000792042	8.04473e-07	0.00363201	9.85947e-07	5.3567e-07	0.0167691	0.410223
																				0
LDM — diallyl_trisulfide_2_LIDI_matrix
	S1	S2	S3	C4	C5	C6	C7	C8	C9	H10	H11	H12	H13	H14	H15	H16	H17	H18	H19
S1	14.6308	0.0764659	0.650333	0.526509	0.00611613	0.0407034	0.000994798	0.0232909	0.000784656	0.0285243	0.0269326	0.000822683	0.00839914	0.00626364	0.000302557	0.00154766	0.00131508	0.000889778	5.1489e-05		71.9672	22.0322
S2	0.0764659	14.6308	0.650291	0.00612596	0.526485	0.000994633	0.0406847	0.000784436	0.0232814	0.00840177	0.000822662	0.0269284	0.0285302	0.000302582	0.00626298	5.14912e-05	0.000889559	0.0013143	0.00154734
S3	0.650333	0.650291	14.5519	0.0372958	0.0372673	0.0148159	0.0148222	0.0137425	0.0137405	0.00436654	0.00868767	0.0086874	0.00436152	0.000502888	0.000502687	0.000373673	0.00245695	0.00245192	0.000373053
C4	0.526509	0.00612596	0.0372958	4.01394	0.000563038	0.517502	0.00024725	0.0369006	0.000175011	0.461217	0.464399	4.49702e-05	0.000231997	0.0199768	1.24307e-05	0.00628289	0.00630471	6.50321e-05	4.84154e-06
C5	0.00611613	0.526485	0.0372673	0.000563038	4.01402	0.000246791	0.517613	0.000174772	0.0369196	0.000232213	4.494e-05	0.464437	0.46119	1.24185e-05	0.0199882	4.835e-06	6.5005e-05	0.00630378	0.00628322
C6	0.0407034	0.000994633	0.0148159	0.517502	0.000246791	3.96673	4.92054e-05	0.916715	3.53344e-05	0.0180587	0.0190759	5.02075e-05	0.000129808	0.473459	3.62135e-06	0.0302238	0.0299827	3.31287e-05	1.38446e-06
C7	0.000994798	0.0406847	0.0148222	0.00024725	0.517613	4.92054e-05	3.967	3.53302e-05	0.916789	0.000129904	5.02623e-05	0.0190921	0.0180649	3.62127e-06	0.47353	1.38456e-06	3.31304e-05	0.0299808	0.0302306
C8	0.0232909	0.000784436	0.0137425	0.0369006	0.000174772	0.916715	3.53302e-05	4.07605	3.13415e-05	0.00619677	0.00885256	3.14078e-05	0.000101708	0.0290443	2.44509e-06	0.483736	0.480069	3.48812e-05	8.51053e-07
C9	0.000784656	0.0232814	0.0137405	0.000175011	0.0369196	3.53344e-05	0.916789	3.13415e-05	4.07616	0.000101821	3.14199e-05	0.00885263	0.00619453	2.44584e-06	0.0290517	8.51443e-07	3.4881e-05	0.480066	0.483765
H10	0.0285243	0.00840177	0.00436654	0.461217	0.000232213	0.0180587	0.000129904	0.00619677	0.000101821	0.388876	0.0145848	1.48874e-05	5.5468e-05	0.00503105	1.02466e-05	0.000444703	0.00406202	8.30651e-06	6.57154e-06
H11	0.0269326	0.000822662	0.00868767	0.464399	4.494e-05	0.0190759	5.02623e-05	0.00885256	3.14199e-05	0.0145848	0.397628	5.78732e-06	1.4884e-05	0.00152921	2.6848e-06	0.000795258	0.00049078	1.98836e-06	6.5128e-07
H12	0.000822683	0.0269284	0.0086874	4.49702e-05	0.464437	5.02075e-05	0.0190921	3.14078e-05	0.00885263	1.48874e-05	5.78732e-06	0.397628	0.0145846	2.68464e-06	0.00152917	6.51324e-07	1.9884e-06	0.000490794	0.000795244
H13	0.00839914	0.0285302	0.00436152	0.000231997	0.46119	0.000129808	0.0180649	0.000101708	0.00619453	5.5468e-05	1.4884e-05	0.0145846	0.388872	1.02437e-05	0.00503093	6.56508e-06	8.30167e-06	0.00406118	0.000444568
H14	0.00626364	0.000302582	0.000502888	0.0199768	1.24185e-05	0.473459	3.62127e-06	0.0290443	2.44584e-06	0.00503105	0.00152921	2.68464e-06	1.02437e-05	0.412287	5.28375e-07	0.00364069	0.0067424	1.04e-06	1.94547e-07
H15	0.000302557	0.00626298	0.000502687	1.24307e-05	0.0199882	3.62135e-06	0.47353	2.44509e-06	0.0290517	1.02466e-05	2.6848e-06	0.00152917	0.00503093	5.28375e-07	0.412281	1.94514e-07	1.04004e-06	0.00674237	0.00364062
H16	0.00154766	5.14912e-05	0.000373673	0.00628289	4.835e-06	0.0302238	1.38456e-06	0.483736	8.51443e-07	0.000444703	0.000795258	6.51324e-07	6.56508e-06	0.00364069	1.94514e-07	0.410806	0.0167474	1.80917e-06	5.00961e-08
H17	0.00131508	0.000889559	0.00245695	0.00630471	6.5005e-05	0.0299827	3.31304e-05	0.480069	3.4881e-05	0.00406202	0.00049078	1.9884e-06	8.30167e-06	0.0067424	1.04004e-06	0.0167474	0.410356	2.11857e-06	1.80889e-06
H18	0.000889778	0.0013143	0.00245192	6.50321e-05	0.00630378	3.31287e-05	0.0299808	3.48812e-05	0.480066	8.30651e-06	1.98836e-06	0.000490794	0.00406118	1.04e-06	0.00674237	1.80917e-06	2.11857e-06	0.410353	0.0167472
H19	5.1489e-05	0.00154734	0.000373053	4.84154e-06	0.00628322	1.38446e-06	0.0302306	8.51053e-07	0.483765	6.57154e-06	6.5128e-07	0.000795244	0.000444568	1.94547e-07	0.00364062	5.00961e-08	1.80889e-06	0.0167472	0.410801
																				0
LDM — diallyl_trisulfide_3_LIDI_matrix
	S1	S2	S3	C4	C5	C6	C7	C8	C9	H10	H11	H12	H13	H14	H15	H16	H17	H18	H19
S1	14.6344	0.0764477	0.65337	0.527418	0.00479649	0.0382128	0.000981981	0.0214288	0.000642912	0.0293623	0.0269883	0.000792407	0.00560751	0.00614719	0.000271559	0.00151518	0.00129214	0.000470359	3.51087e-05		71.959	22.041
S2	0.0764477	14.6049	0.649079	0.00342858	0.526925	0.0122812	0.0404401	0.00951786	0.0230092	0.000521354	0.000994712	0.0269751	0.0286685	0.00321985	0.00636798	0.000659053	0.000362514	0.00131074	0.00154155
S3	0.65337	0.649079	14.5639	0.0378998	0.0376673	0.011874	0.0147979	0.009214	0.0135597	0.00590934	0.00836002	0.00867233	0.00482683	0.000625424	0.000518628	0.000315881	0.00222603	0.00262647	0.000374121
C4	0.527418	0.00342858	0.0378998	4.01132	0.000608708	0.517223	0.000231869	0.0370707	0.000146753	0.463744	0.46372	7.27006e-05	0.000233759	0.0198153	1.21103e-05	0.00628024	0.00639827	4.30705e-05	2.44632e-06
C5	0.00479649	0.526925	0.0376673	0.000608708	4.01256	0.000395159	0.517487	0.000662599	0.0368036	0.000121671	0.000129799	0.464372	0.462443	6.86112e-05	0.0199661	4.56078e-05	5.34644e-05	0.00631789	0.0062863
C6	0.0382128	0.0122812	0.011874	0.517223	0.000395159	3.96381	0.000166684	0.914225	0.000149623	0.0183668	0.0192296	1.78878e-05	5.62744e-05	0.472056	1.01312e-05	0.0301858	0.0300388	1.87585e-05	9.1214e-06
C7	0.000981981	0.0404401	0.0147979	0.000231869	0.517487	0.000166684	3.96711	0.000169572	0.917005	1.63011e-05	6.1513e-05	0.0192089	0.0182789	4.20129e-05	0.473425	1.12586e-05	1.14551e-05	0.0300432	0.0302756
C8	0.0214288	0.00951786	0.009214	0.0370707	0.000662599	0.914225	0.000169572	4.07639	0.000174655	0.00643251	0.00949123	1.65932e-05	3.88823e-05	0.0285839	5.80161e-06	0.483466	0.480407	2.01763e-05	1.21612e-05
C9	0.000642912	0.0230092	0.0135597	0.000146753	0.0368036	0.000149623	0.917005	0.000174655	4.07683	1.44755e-05	3.16588e-05	0.00894738	0.00622715	2.39846e-05	0.029077	1.20175e-05	9.49508e-06	0.480293	0.483827
H10	0.0293623	0.000521354	0.00590934	0.463744	0.000121671	0.0183668	1.63011e-05	0.00643251	1.44755e-05	0.394604	0.0146491	2.31744e-05	9.61266e-05	0.00517754	1.84901e-06	0.000466531	0.00432945	9.48169e-06	6.40501e-07
H11	0.0269883	0.000994712	0.00836002	0.46372	0.000129799	0.0192296	6.1513e-05	0.00949123	3.16588e-05	0.0146491	0.397172	1.90606e-05	1.87556e-05	0.00137464	3.59565e-06	0.000788811	0.000503233	2.56314e-06	8.48073e-07
H12	0.000792407	0.0269751	0.00867233	7.27006e-05	0.464372	1.78878e-05	0.0192089	1.65932e-05	0.00894738	2.31744e-05	1.90606e-05	0.398456	0.0146929	5.76725e-06	0.00152801	1.034e-06	6.68951e-06	0.000493733	0.000794068
H13	0.00560751	0.0286685	0.00482683	0.000233759	0.462443	5.62744e-05	0.0182789	3.88823e-05	0.00622715	9.61266e-05	1.87556e-05	0.0146929	0.392583	2.03472e-05	0.00508954	3.31717e-06	4.0153e-06	0.00410159	0.00044868
H14	0.00614719	0.00321985	0.000625424	0.0198153	6.86112e-05	0.472056	4.20129e-05	0.0285839	2.39846e-05	0.00517754	0.00137464	5.76725e-06	2.03472e-05	0.408881	3.40164e-06	0.0036196	0.00672479	1.80224e-06	1.94664e-06
H15	0.000271559	0.00636798	0.000518628	1.21103e-05	0.0199661	1.01312e-05	0.473425	5.80161e-06	0.029077	1.84901e-06	3.59565e-06	0.00152801	0.00508954	3.40164e-06	0.412578	4.68723e-07	4.00858e-07	0.00676349	0.00364957
H16	0.00151518	0.000659053	0.000315881	0.00628024	4.56078e-05	0.0301858	1.12586e-05	0.483466	1.20175e-05	0.000466531	0.000788811	1.034e-06	3.31717e-06	0.0036196	4.68723e-07	0.409807	0.0167595	1.26693e-06	8.83649e-07
H17	0.00129214	0.000362514	0.00222603	0.00639827	5.34644e-05	0.0300388	1.14551e-05	0.480407	9.49508e-06	0.00432945	0.000503233	6.68951e-06	4.0153e-06	0.00672479	4.00858e-07	0.0167595	0.411279	1.61678e-06	4.69045e-07
H18	0.000470359	0.00131074	0.00262647	4.30705e-05	0.00631789	1.87585e-05	0.0300432	2.01763e-05	0.480293	9.48169e-06	2.56314e-06	0.000493733	0.00410159	1.80224e-06	0.00676349	1.26693e-06	1.61678e-06	0.411161	0.0167923
H19	3.51087e-05	0.00154155	0.000374121	2.44632e-06	0.0062863	9.1214e-06	0.0302756	1.21612e-05	0.483827	6.40501e-07	8.48073e-07	0.000794068	0.00044868	1.94664e-06	0.00364957	8.83649e-07	4.69045e-07	0.0167923	0.411304
																				0
LDM — diallyl_trisulfide_4_LIDI_matrix
	S1	S2	S3	C4	C5	C6	C7	C8	C9	H10	H11	H12	H13	H14	H15	H16	H17	H18	H19
S1	14.6254	0.0775876	0.650281	0.527057	0.00427637	0.042525	0.00101999	0.0237684	0.00049188	0.0279028	0.0266398	0.000867128	0.00329623	0.00614803	0.000249298	0.001201	0.00154039	0.000449983	2.54313e-05		71.951	22.0494
S2	0.0775876	14.6162	0.653745	0.00367103	0.532173	0.0013641	0.0377235	0.00100278	0.0182006	0.000936293	0.000776181	0.0273594	0.0288425	0.000205467	0.00840578	0.000385271	5.00227e-05	0.00120417	0.00154564
S3	0.650281	0.653745	14.5671	0.0372741	0.0370708	0.0114551	0.015552	0.0111592	0.00667979	0.0057494	0.00827896	0.00883493	0.00274752	0.000440793	0.00117118	0.00249628	0.000322807	0.000293446	0.000261036
C4	0.527057	0.00367103	0.0372741	4.008	0.00141762	0.516439	0.000797253	0.0363801	0.00181161	0.458648	0.465105	0.000114483	0.00230397	0.0200085	7.4419e-05	0.00560046	0.00629332	0.00229116	9.05958e-05
C5	0.00427637	0.532173	0.0370708	0.00141762	4.01612	0.000159158	0.516101	0.000159831	0.0368852	0.0027702	0.000156586	0.461263	0.462481	4.89922e-05	0.019497	0.000236531	9.15618e-06	0.00619258	0.0062609
C6	0.042525	0.0013641	0.0114551	0.516439	0.000159158	3.97128	0.000162876	0.91796	0.000537041	0.0181421	0.0192351	2.93585e-05	0.000216386	0.473517	1.01774e-05	0.0293128	0.0304121	0.000292626	7.94324e-05
C7	0.00101999	0.0377235	0.015552	0.000797253	0.516101	0.000162876	3.96374	0.00163901	0.913967	0.00185683	5.54244e-05	0.0195359	0.0184256	0.000123457	0.471156	0.00421566	0.000152524	0.0301429	0.0299479
C8	0.0237684	0.00100278	0.0111592	0.0363801	0.000159831	0.91796	0.00163901	4.08135	0.00492328	0.00567938	0.00860052	7.28424e-05	5.04255e-05	0.0290545	5.75983e-05	0.472696	0.483995	0.00100094	0.000501087
C9	0.00049188	0.0182006	0.00667979	0.00181161	0.0368852	0.000537041	0.913967	0.00492328	4.07722	0.00526657	0.00011249	0.0106513	0.00631368	0.000252251	0.0285419	0.0126845	0.000391368	0.477765	0.482275
H10	0.0279028	0.000936293	0.0057494	0.458648	0.0027702	0.0181421	0.00185683	0.00567938	0.00526657	0.391048	0.0144811	0.000244945	0.00397104	0.00482604	0.00019041	0.00321087	0.000376473	0.00509884	0.000305835
H11	0.0266398	0.000776181	0.00827896	0.465105	0.000156586	0.0192351	5.54244e-05	0.00860052	0.00011249	0.0144811	0.398995	8.63879e-06	0.000117892	0.00164592	6.99673e-06	0.000447648	0.000793307	0.000102401	4.52991e-06
H12	0.000867128	0.0273594	0.00883493	0.000114483	0.461263	2.93585e-05	0.0195359	7.28424e-05	0.0106513	0.000244945	8.63879e-06	0.391165	0.0146503	4.78293e-06	0.000969252	0.00014405	6.58266e-06	0.000491976	0.000737807
H13	0.00329623	0.0288425	0.00274752	0.00230397	0.462481	0.000216386	0.0184256	5.04255e-05	0.00631368	0.00397104	0.000117892	0.0146503	0.397794	0.000105977	0.00511839	3.05032e-05	2.26098e-06	0.00406221	0.000462459
H14	0.00614803	0.000205467	0.000440793	0.0200085	4.89922e-05	0.473517	0.000123457	0.0290545	0.000252251	0.00482604	0.00164592	4.78293e-06	0.000105977	0.412554	7.0445e-06	0.00637768	0.00368173	0.000135601	3.41994e-05
H15	0.000249298	0.00840578	0.00117118	7.4419e-05	0.019497	1.01774e-05	0.471156	5.75983e-05	0.0285419	0.00019041	6.99673e-06	0.000969252	0.00511839	7.0445e-06	0.404457	0.000133107	6.02654e-06	0.00666101	0.00361719
H16	0.001201	0.000385271	0.00249628	0.00560046	0.000236531	0.0293128	0.00421566	0.472696	0.0126845	0.00321087	0.000447648	0.00014405	3.05032e-05	0.00637768	0.000133107	0.395914	0.0161064	0.0024127	0.00165158
H17	0.00154039	5.00227e-05	0.000322807	0.00629332	9.15618e-06	0.0304121	0.000152524	0.483995	0.000391368	0.000376473	0.000793307	6.58266e-06	2.26098e-06	0.00368173	6.02654e-06	0.0161064	0.411841	0.000102384	2.8654e-05
H18	0.000449983	0.00120417	0.000293446	0.00229116	0.00619258	0.000292626	0.0301429	0.00100094	0.477765	0.00509884	0.000102401	0.000491976	0.00406221	0.000135601	0.00666101	0.0024127	0.000102384	0.413245	0.0168221
H19	2.54313e-05	0.00154564	0.000261036	9.05958e-05	0.0062609	7.94324e-05	0.0299479	0.000501087	0.482275	0.000305835	4.52991e-06	0.000737807	0.000462459	3.41994e-05	0.00361719	0.00165158	2.8654e-05	0.0168221	0.407534
																				0
LDM — diallyl_trisulfide_5_LIDI_matrix
	S1	S2	S3	C4	C5	C6	C7	C8	C9	H10	H11	H12	H13	H14	H15	H16	H17	H18	H19
S1	14.6308	0.0763851	0.650357	0.526789	0.00540137	0.0407386	0.00120198	0.023324	0.000827909	0.0269671	0.0285653	0.000610404	0.00646838	0.00625528	0.000338693	0.00155017	0.00132071	5.29305e-05	7.28929e-05		71.9967	22.0031
S2	0.0763851	14.625	0.650899	0.00584717	0.525755	0.000978824	0.0424269	0.000760046	0.0207939	0.000825388	0.00789513	0.028753	0.0287853	0.000293176	0.00568213	4.86901e-05	0.000801635	0.00109741	0.00124115
S3	0.650357	0.650899	14.5794	0.0374595	0.0379762	0.0149062	0.00917576	0.0137789	0.00506268	0.00871504	0.00443792	0.010352	0.00312652	0.000507197	0.000330982	0.000375788	0.00248512	0.000480038	0.000240634
C4	0.526789	0.00584717	0.0374595	4.01453	0.000561176	0.517525	7.83875e-05	0.0369203	5.94905e-05	0.464512	0.461356	0.000158092	0.000187765	0.0199688	8.72022e-06	0.00628414	0.00630778	5.93865e-06	3.8663e-06
C5	0.00540137	0.525755	0.0379762	0.000561176	4.0133	0.000238404	0.515654	0.000166163	0.0374496	4.95254e-05	0.000248463	0.462975	0.463571	1.16903e-05	0.0196751	4.51344e-06	6.85187e-05	0.00634917	0.00633322
C6	0.0407386	0.000978824	0.0149062	0.517525	0.000238404	3.96714	5.34111e-05	0.916782	3.71344e-05	0.0190745	0.0180568	3.65879e-05	0.000110059	0.473503	3.88247e-06	0.0302335	0.0299606	4.27962e-06	2.09702e-06
C7	0.00120198	0.0424269	0.00917576	7.83875e-05	0.515654	5.34111e-05	3.97783	3.24865e-05	0.920991	1.35973e-05	3.70554e-05	0.0187083	0.0181433	4.05364e-06	0.473416	6.09976e-07	6.00985e-06	0.0301762	0.030195
C8	0.023324	0.000760046	0.0137789	0.0369203	0.000166163	0.916782	3.24865e-05	4.07636	2.09029e-05	0.00886264	0.00620048	2.40162e-05	9.05183e-05	0.0290496	3.13462e-06	0.483753	0.480078	2.31895e-06	1.44793e-06
C9	0.000827909	0.0207939	0.00506268	5.94905e-05	0.0374496	3.71344e-05	0.920991	2.09029e-05	4.08037	6.40541e-06	3.65556e-05	0.00899808	0.00638787	2.6965e-06	0.0293648	5.75805e-07	9.91066e-06	0.483454	0.480715
H10	0.0269671	0.000825388	0.00871504	0.464512	4.95254e-05	0.0190745	1.35973e-05	0.00886264	6.40541e-06	0.397441	0.0145914	2.63643e-05	1.22613e-05	0.00152887	1.78768e-06	0.00079485	0.000491006	7.67741e-07	5.73041e-07
H11	0.0285653	0.00789513	0.00443792	0.461356	0.000248463	0.0180568	3.70554e-05	0.00620048	3.65556e-05	0.0145914	0.388932	0.000103615	5.9231e-05	0.0050362	9.01163e-06	0.000444471	0.00405964	1.42656e-06	2.58062e-06
H12	0.000610404	0.028753	0.010352	0.000158092	0.462975	3.65879e-05	0.0187083	2.40162e-05	0.00899808	2.63643e-05	0.000103615	0.389654	0.0147194	2.32671e-06	0.00163914	9.668e-07	2.16001e-05	0.0008005	0.000522265
H13	0.00646838	0.0287853	0.00312652	0.000187765	0.463571	0.000110059	0.0181433	9.05183e-05	0.00638787	1.22613e-05	5.9231e-05	0.0147194	0.393955	7.97864e-06	0.00499381	5.78197e-06	6.6357e-06	0.00046678	0.00402205
H14	0.00625528	0.000293176	0.000507197	0.0199688	1.16903e-05	0.473503	4.05364e-06	0.0290496	2.6965e-06	0.00152887	0.0050362	2.32671e-06	7.97864e-06	0.412254	6.77258e-07	0.00364164	0.00674321	1.86532e-07	1.79124e-07
H15	0.000338693	0.00568213	0.000330982	8.72022e-06	0.0196751	3.88247e-06	0.473416	3.13462e-06	0.0293648	1.78768e-06	9.01163e-06	0.00163914	0.00499381	6.77258e-07	0.409108	1.59019e-07	5.35403e-07	0.00363302	0.00675924
H16	0.00155017	4.86901e-05	0.000375788	0.00628414	4.51344e-06	0.0302335	6.09976e-07	0.483753	5.75805e-07	0.00079485	0.000444471	9.668e-07	5.78197e-06	0.00364164	1.59019e-07	0.410752	0.0167428	5.73914e-08	4.97073e-08
H17	0.00132071	0.000801635	0.00248512	0.00630778	6.85187e-05	0.0299606	6.00985e-06	0.480078	9.91066e-06	0.000491006	0.00405964	2.16001e-05	6.6357e-06	0.00674321	5.35403e-07	0.0167428	0.410206	4.15752e-07	4.12557e-07
H18	5.29305e-05	0.00109741	0.000480038	5.93865e-06	0.00634917	4.27962e-06	0.0301762	2.31895e-06	0.483454	7.67741e-07	1.42656e-06	0.0008005	0.00046678	1.86532e-07	0.00363302	5.73914e-08	4.15752e-07	0.408957	0.0167565
H19	7.28929e-05	0.00124115	0.000240634	3.8663e-06	0.00633322	2.09702e-06	0.030195	1.44793e-06	0.480715	5.73041e-07	2.58062e-06	0.000522265	0.00402205	1.79124e-07	0.00675924	4.97073e-08	4.12557e-07	0.0167565	0.410635
																				0
LDM — diallyl_trisulfide_6_LIDI_matrix
	S1	S2	S3	C4	C5	C6	C7	C8	C9	H10	H11	H12	H13	H14	H15	H16	H17	H18	H19
S1	14.6296	0.0766365	0.649956	0.526636	0.00586962	0.0406606	0.00111318	0.0232985	0.000971991	0.0269386	0.0285474	0.00885808	0.00065473	0.00621026	0.000164467	0.00131715	0.0015461	5.61828e-05	6.35319e-05		71.9968	22.0032
S2	0.0766365	14.6251	0.649305	0.00614039	0.526194	0.000984334	0.0424472	0.000781366	0.0206467	0.000829689	0.00853816	0.0279302	0.0294637	0.000301896	0.0058246	0.000893757	5.19106e-05	0.00125644	0.00110252
S3	0.649956	0.649305	14.5823	0.0374231	0.0379759	0.0148301	0.00929286	0.0137458	0.00500193	0.00872409	0.00439664	0.00703884	0.00489589	0.000500969	0.000519651	0.00246512	0.000374141	0.000243068	0.000475461
C4	0.526636	0.00614039	0.0374231	4.01427	0.000583675	0.51764	7.3495e-05	0.0369404	6.15233e-05	0.464376	0.461053	0.000255015	0.000125208	0.019982	1.50018e-05	0.00629639	0.00628215	3.67845e-06	4.36266e-06
C5	0.00586962	0.526194	0.0379759	0.000583675	4.01316	0.000239124	0.515622	0.000170415	0.0374655	4.79774e-05	0.000271275	0.460676	0.465351	1.21789e-05	0.0196965	7.60523e-05	4.97257e-06	0.00633222	0.00634921
C6	0.0406606	0.000984334	0.0148301	0.51764	0.000239124	3.96711	5.21041e-05	0.916836	4.24769e-05	0.0190579	0.0180894	0.00015517	2.21752e-05	0.473477	3.61053e-06	0.0300145	0.0302237	2.28937e-06	4.42624e-06
C7	0.00111318	0.0424472	0.00929286	7.3495e-05	0.515622	5.21041e-05	3.978	3.22773e-05	0.921101	1.06059e-05	3.39749e-05	0.0187925	0.018173	3.42117e-06	0.473447	6.14061e-06	9.09363e-07	0.0302124	0.0302144
C8	0.0232985	0.000781366	0.0137458	0.0369404	0.000170415	0.916836	3.22773e-05	4.07614	2.2278e-05	0.00883981	0.00619539	0.00012857	1.31615e-05	0.0290409	2.54819e-06	0.480023	0.483713	1.20924e-06	2.59673e-06
C9	0.000971991	0.0206467	0.00500193	6.15233e-05	0.0374655	4.24769e-05	0.921101	2.2278e-05	4.0801	4.51656e-06	1.987e-05	0.0089324	0.00636238	2.3508e-06	0.0293899	7.5332e-06	1.08198e-06	0.480716	0.483471
H10	0.0269386	0.000829689	0.00872409	0.464376	4.79774e-05	0.0190579	1.06059e-05	0.00883981	4.51656e-06	0.397321	0.0145761	1.43508e-05	1.92756e-05	0.00153043	3.4632e-06	0.000490598	0.000794913	5.40018e-07	5.28904e-07
H11	0.0285474	0.00853816	0.00439664	0.461053	0.000271275	0.0180894	3.39749e-05	0.00619539	1.987e-05	0.0145761	0.38862	5.25251e-05	0.000134333	0.00502598	1.15905e-05	0.00405823	0.000444332	2.40634e-06	1.00494e-06
H12	0.00885808	0.0279302	0.00703884	0.000255015	0.460676	0.00015517	0.0187925	0.00012857	0.0089324	1.43508e-05	5.25251e-05	0.385979	0.0146441	1.10593e-05	0.00165105	1.12462e-05	7.62367e-06	0.000522877	0.000795915
H13	0.00065473	0.0294637	0.00489589	0.000125208	0.465351	2.21752e-05	0.018173	1.31615e-05	0.00636238	1.92756e-05	0.000134333	0.0146441	0.397122	2.16902e-06	0.00505079	1.9316e-05	9.96158e-07	0.00400228	0.000462507
H14	0.00621026	0.000301896	0.000500969	0.019982	1.21789e-05	0.473477	3.42117e-06	0.0290409	2.3508e-06	0.00153043	0.00502598	1.10593e-05	2.16902e-06	0.412164	2.97876e-07	0.00673955	0.00363886	1.37142e-07	1.84485e-07
H15	0.000164467	0.0058246	0.000519651	1.50018e-05	0.0196965	3.61053e-06	0.473447	2.54819e-06	0.0293899	3.4632e-06	1.15905e-05	0.00165105	0.00505079	2.97876e-07	0.409486	9.28339e-07	1.77367e-07	0.00676258	0.0036458
H16	0.00131715	0.000893757	0.00246512	0.00629639	7.60523e-05	0.0300145	6.14061e-06	0.480023	7.5332e-06	0.000490598	0.00405823	1.12462e-05	1.9316e-05	0.00673955	9.28339e-07	0.410109	0.0167328	3.56459e-07	3.72378e-07
H17	0.0015461	5.19106e-05	0.000374141	0.00628215	4.97257e-06	0.0302237	9.09363e-07	0.483713	1.08198e-06	0.000794913	0.000444332	7.62367e-06	9.96158e-07	0.00363886	1.77367e-07	0.0167328	0.41058	6.59714e-08	7.19291e-08
H18	5.61828e-05	0.00125644	0.000243068	3.67845e-06	0.00633222	2.28937e-06	0.0302124	1.20924e-06	0.480716	5.40018e-07	2.40634e-06	0.000522877	0.00400228	1.37142e-07	0.00676258	3.56459e-07	6.59714e-08	0.410616	0.0167524
H19	6.35319e-05	0.00110252	0.000475461	4.36266e-06	0.00634921	4.42624e-06	0.0302144	2.59673e-06	0.483471	5.28904e-07	1.00494e-06	0.000795915	0.000462507	1.84485e-07	0.0036458	3.72378e-07	7.19291e-08	0.0167524	0.409031
																				0
LDM — diallyl_trisulfide_7_LIDI_matrix
	S1	S2	S3	C4	C5	C6	C7	C8	C9	H10	H11	H12	H13	H14	H15	H16	H17	H18	H19
S1	14.6251	0.0766366	0.649305	0.526194	0.00614037	0.0424471	0.000984334	0.0206466	0.000781368	0.0294637	0.0279302	0.000829688	0.00853812	0.00582459	0.000301895	0.00110252	0.00125644	5.19106e-05	0.000893757		71.9968	22.0032
S2	0.0766366	14.6296	0.649956	0.0058696	0.526636	0.00111318	0.0406606	0.000971991	0.0232985	0.000654729	0.00885803	0.0269386	0.0285474	0.000164466	0.00621025	6.35318e-05	5.61827e-05	0.0015461	0.00131715
S3	0.649305	0.649956	14.5823	0.0379759	0.0374231	0.00929287	0.0148301	0.00500193	0.0137459	0.00489592	0.00703882	0.00872409	0.00439663	0.000519652	0.000500969	0.000475461	0.000243068	0.000374142	0.00246513
C4	0.526194	0.0058696	0.0379759	4.01316	0.000583675	0.515622	0.000239125	0.0374655	0.000170416	0.465351	0.460676	4.79775e-05	0.000271274	0.0196965	1.2179e-05	0.00634921	0.00633221	4.97246e-06	7.60523e-05
C5	0.00614037	0.526636	0.0374231	0.000583675	4.01427	7.34955e-05	0.51764	6.15235e-05	0.0369404	0.000125209	0.000255014	0.464376	0.461053	1.50018e-05	0.019982	4.36278e-06	3.67853e-06	0.00628215	0.00629639
C6	0.0424471	0.00111318	0.00929287	0.515622	7.34955e-05	3.978	5.21042e-05	0.921101	3.22773e-05	0.018173	0.0187925	1.06061e-05	3.39748e-05	0.473447	3.42146e-06	0.0302144	0.0302124	9.0924e-07	6.14052e-06
C7	0.000984334	0.0406606	0.0148301	0.000239125	0.51764	5.21042e-05	3.96711	4.24769e-05	0.916835	2.21751e-05	0.00015517	0.0190579	0.0180894	3.6104e-06	0.473477	4.42615e-06	2.28957e-06	0.0302237	0.0300145
C8	0.0206466	0.000971991	0.00500193	0.0374655	6.15235e-05	0.921101	4.24769e-05	4.0801	2.22782e-05	0.00636238	0.0089324	4.51678e-06	1.98702e-05	0.0293899	2.35087e-06	0.483471	0.480716	1.082e-06	7.53317e-06
C9	0.000781368	0.0232985	0.0137459	0.000170416	0.0369404	3.22773e-05	0.916835	2.22782e-05	4.07614	1.31617e-05	0.00012857	0.00883979	0.00619538	2.54839e-06	0.0290409	2.59645e-06	1.2094e-06	0.483713	0.480023
H10	0.0294637	0.000654729	0.00489592	0.465351	0.000125209	0.018173	2.21751e-05	0.00636238	1.31617e-05	0.397122	0.0146441	1.92757e-05	0.000134333	0.00505079	2.16901e-06	0.000462507	0.00400228	9.96108e-07	1.93161e-05
H11	0.0279302	0.00885803	0.00703882	0.460676	0.000255014	0.0187925	0.00015517	0.0089324	0.00012857	0.0146441	0.385979	1.43507e-05	5.25249e-05	0.00165105	1.10592e-05	0.000795915	0.000522877	7.62374e-06	1.12462e-05
H12	0.000829688	0.0269386	0.00872409	4.79775e-05	0.464376	1.06061e-05	0.0190579	4.51678e-06	0.00883979	1.92757e-05	1.43507e-05	0.397321	0.0145761	3.46314e-06	0.00153043	5.28967e-07	5.39968e-07	0.000794913	0.000490598
H13	0.00853812	0.0285474	0.00439663	0.000271274	0.461053	3.39748e-05	0.0180894	1.98702e-05	0.00619538	0.000134333	5.25249e-05	0.0145761	0.38862	1.15904e-05	0.00502598	1.00508e-06	2.40623e-06	0.000444332	0.00405822
H14	0.00582459	0.000164466	0.000519652	0.0196965	1.50018e-05	0.473447	3.6104e-06	0.0293899	2.54839e-06	0.00505079	0.00165105	3.46314e-06	1.15904e-05	0.409486	2.9792e-07	0.00364581	0.00676257	1.77423e-07	9.28398e-07
H15	0.000301895	0.00621025	0.000500969	1.2179e-05	0.019982	3.42146e-06	0.473477	2.35087e-06	0.0290409	2.16901e-06	1.10592e-05	0.00153043	0.00502598	2.9792e-07	0.412164	1.84479e-07	1.37172e-07	0.00363886	0.00673955
H16	0.00110252	6.35318e-05	0.000475461	0.00634921	4.36278e-06	0.0302144	4.42615e-06	0.483471	2.59645e-06	0.000462507	0.000795915	5.28967e-07	1.00508e-06	0.00364581	1.84479e-07	0.409031	0.0167524	7.18764e-08	3.72308e-07
H17	0.00125644	5.61827e-05	0.000243068	0.00633221	3.67853e-06	0.0302124	2.28957e-06	0.480716	1.2094e-06	0.00400228	0.000522877	5.39968e-07	2.40623e-06	0.00676257	1.37172e-07	0.0167524	0.410616	6.6003e-08	3.56532e-07
H18	5.19106e-05	0.0015461	0.000374142	4.97246e-06	0.00628215	9.0924e-07	0.0302237	1.082e-06	0.483713	9.96108e-07	7.62374e-06	0.000794913	0.000444332	1.77423e-07	0.00363886	7.18764e-08	6.6003e-08	0.41058	0.0167328
H19	0.000893757	0.00131715	0.00246513	7.60523e-05	0.00629639	6.14052e-06	0.0300145	7.53317e-06	0.480023	1.93161e-05	1.12462e-05	0.000490598	0.00405822	9.28398e-07	0.00673955	3.72308e-07	3.56532e-07	0.0167328	0.410109
																				0
LDM — diallyl_trisulfide_8_LIDI_matrix
	S1	S2	S3	C4	C5	C6	C7	C8	C9	H10	H11	H12	H13	H14	H15	H16	H17	H18	H19
S1	14.6002	0.076176	0.649618	0.525652	0.00337587	0.0426807	0.0120168	0.0208417	0.00939381	0.0283635	0.029008	0.000518233	0.000999532	0.00581312	0.00312826	0.00110001	0.00125088	0.000355867	0.000659752		71.9861	22.0138
S2	0.076176	14.6336	0.653688	0.00432005	0.527538	0.00119001	0.0384084	0.000839736	0.0215719	0.000595757	0.00438597	0.0293834	0.0269978	0.000303277	0.00614195	5.271e-05	6.40052e-05	0.00130051	0.00151418
S3	0.649618	0.653688	14.5915	0.0384068	0.0380708	0.00906703	0.0121875	0.00492067	0.00947907	0.0109294	0.00330037	0.00594295	0.00837759	0.000342959	0.00063416	0.000472894	0.000233681	0.00229131	0.000321377
C4	0.525652	0.00432005	0.0384068	4.01193	0.000602637	0.515603	0.000436866	0.0374228	0.000703013	0.462891	0.464565	0.000113085	0.000129464	0.0196182	7.38304e-05	0.00635281	0.00634192	5.31007e-05	4.99937e-05
C5	0.00337587	0.527538	0.0380708	0.000602637	4.01136	0.000106724	0.517108	7.83906e-05	0.0370469	0.000137861	0.000182347	0.463769	0.46377	9.42039e-06	0.0198102	9.01323e-06	4.52152e-06	0.00640096	0.00627873
C6	0.0426807	0.00119001	0.00906703	0.515603	0.000106724	3.97755	4.36891e-05	0.920932	5.08269e-05	0.018776	0.0183347	2.4046e-05	3.52197e-05	0.473347	9.91198e-06	0.0302025	0.030227	9.22337e-06	4.2419e-06
C7	0.0120168	0.0384084	0.0121875	0.000436866	0.517108	4.36891e-05	3.9642	4.56836e-05	0.914131	0.000139818	6.28979e-05	0.018321	0.019198	7.53385e-06	0.472033	2.13316e-06	3.13851e-06	0.0300103	0.0301435
C8	0.0208417	0.000839736	0.00492067	0.0374228	7.83906e-05	0.920932	4.56836e-05	4.08098	6.35846e-05	0.00905831	0.00641661	2.10194e-05	2.50034e-05	0.0293763	9.1845e-06	0.483574	0.480794	5.66385e-06	6.49327e-06
C9	0.00939381	0.0215719	0.00947907	0.000703013	0.0370469	5.08269e-05	0.914131	6.35846e-05	4.07629	0.000138375	3.94416e-05	0.00640912	0.00944774	2.70916e-06	0.0285722	3.26896e-06	3.48736e-06	0.480391	0.483368
H10	0.0283635	0.000595757	0.0109294	0.462891	0.000137861	0.018776	0.000139818	0.00905831	0.000138375	0.390331	0.0148305	1.23358e-05	2.85806e-05	0.00164334	3.70004e-05	0.000801783	0.000526573	7.70927e-06	1.09984e-05
H11	0.029008	0.00438597	0.00330037	0.464565	0.000182347	0.0183347	6.28979e-05	0.00641661	3.94416e-05	0.0148305	0.397373	8.05383e-05	1.27643e-05	0.00504059	2.52798e-05	0.000469148	0.0040565	3.21266e-06	3.2583e-06
H12	0.000518233	0.0293834	0.00594295	0.000113085	0.463769	2.4046e-05	0.018321	2.10194e-05	0.00640912	1.23358e-05	8.05383e-05	0.394758	0.0146522	2.17679e-06	0.00517202	2.02425e-06	1.19531e-06	0.00431823	0.000465358
H13	0.000999532	0.0269978	0.00837759	0.000129464	0.46377	3.52197e-05	0.019198	2.50034e-05	0.00944774	2.85806e-05	1.27643e-05	0.0146522	0.397096	2.93742e-06	0.00138152	2.62711e-06	1.52962e-06	0.000502403	0.000788004
H14	0.00581312	0.000303277	0.000342959	0.0196182	9.42039e-06	0.473347	7.53385e-06	0.0293763	2.70916e-06	0.00164334	0.00504059	2.17679e-06	2.93742e-06	0.409255	1.9367e-06	0.00363743	0.0067668	2.48717e-07	4.41719e-07
H15	0.00312826	0.00614195	0.00063416	7.38304e-05	0.0198102	9.91198e-06	0.472033	9.1845e-06	0.0285722	3.70004e-05	2.52798e-05	0.00517202	0.00138152	1.9367e-06	0.40847	4.7187e-07	1.11097e-06	0.00672338	0.00361733
H16	0.00110001	5.271e-05	0.000472894	0.00635281	9.01323e-06	0.0302025	2.13316e-06	0.483574	3.26896e-06	0.000801783	0.000469148	2.02425e-06	2.62711e-06	0.00363743	4.7187e-07	0.409429	0.0167859	6.50414e-07	2.67859e-07
H17	0.00125088	6.40052e-05	0.000233681	0.00634192	4.52152e-06	0.030227	3.13851e-06	0.480794	3.48736e-06	0.000526573	0.0040565	1.19531e-06	1.52962e-06	0.0067668	1.11097e-06	0.0167859	0.411102	3.27167e-07	2.98082e-07
H18	0.000355867	0.00130051	0.00229131	5.31007e-05	0.00640096	9.22337e-06	0.0300103	5.66385e-06	0.480391	7.70927e-06	3.21266e-06	0.00431823	0.000502403	2.48717e-07	0.00672338	6.50414e-07	3.27167e-07	0.411427	0.0167476
H19	0.000659752	0.00151418	0.000321377	4.99937e-05	0.00627873	4.2419e-06	0.0301435	6.49327e-06	0.483368	1.09984e-05	3.2583e-06	0.000465358	0.000788004	4.41719e-07	0.00361733	2.67859e-07	2.98082e-07	0.0167476	0.409232
																				0
LDM — diallyl_trisulfide_9_LIDI_matrix
	S1	S2	S3	C4	C5	C6	C7	C8	C9	H10	H11	H12	H13	H14	H15	H16	H17	H18	H19
S1	14.6284	0.0767719	0.649839	0.526568	0.00624794	0.040686	0.000899288	0.0233253	0.000428815	0.0285255	0.0269372	0.000786384	0.00941041	0.00619076	0.000398824	0.00154472	0.00131571	4.15959e-05	4.64333e-05		71.9837	22.0146
S2	0.0767719	14.6246	0.649157	0.00616022	0.529213	0.000995185	0.0416554	0.000782668	0.0211036	0.00860454	0.000832157	0.0258447	0.0292251	0.000303015	0.00369604	5.18311e-05	0.000896649	0.000962449	0.0015148
S3	0.649839	0.649157	14.5718	0.0372412	0.0370982	0.0149066	0.00868212	0.0138861	0.00173413	0.00441177	0.0086782	0.00849774	0.00593924	0.000502959	0.0116095	0.000374942	0.00248857	0.000440901	0.000204764
C4	0.526568	0.00616022	0.0372412	4.01415	0.000538411	0.517642	0.0001549	0.0370052	7.33261e-05	0.461025	0.464202	3.87934e-05	0.000261611	0.0199969	0.000183001	0.0062825	0.00630798	9.5625e-06	8.09158e-06
C5	0.00624794	0.529213	0.0370982	0.000538411	4.01574	0.000241143	0.515893	0.000170932	0.0372316	0.000239167	4.14066e-05	0.463955	0.460193	1.22324e-05	0.0191929	5.0211e-06	6.76446e-05	0.00638569	0.00633516
C6	0.040686	0.000995185	0.0149066	0.517642	0.000241143	3.96714	3.08163e-05	0.916713	1.45602e-05	0.018036	0.0190349	4.73242e-05	0.000152518	0.47349	3.43419e-05	0.0302003	0.029967	3.09986e-06	2.25828e-06
C7	0.000899288	0.0416554	0.00868212	0.0001549	0.515893	3.08163e-05	3.97268	1.93722e-05	0.924076	0.000136348	2.69017e-05	0.0181396	0.0188022	2.8157e-06	0.4695	1.07212e-06	2.36543e-05	0.0307371	0.0304371
C8	0.0233253	0.000782668	0.0138861	0.0370052	0.000170932	0.916713	1.93722e-05	4.07607	1.54561e-05	0.00621693	0.0088225	2.97811e-05	0.000123287	0.029034	2.52656e-05	0.483694	0.480059	2.05822e-06	1.50939e-06
C9	0.000428815	0.0211036	0.00173413	7.33261e-05	0.0372316	1.45602e-05	0.924076	1.54561e-05	4.08256	8.23114e-05	5.36381e-06	0.00647495	0.00921271	2.14846e-06	0.0287433	5.32301e-07	1.94555e-05	0.481872	0.483852
H10	0.0285255	0.00860454	0.00441177	0.461025	0.000239167	0.018036	0.000136348	0.00621693	8.23114e-05	0.38841	0.0145628	1.41315e-05	5.60317e-05	0.00502073	1.02445e-05	0.000444528	0.00405802	3.1483e-06	7.21024e-06
H11	0.0269372	0.000832157	0.0086782	0.464202	4.14066e-05	0.0190349	2.69017e-05	0.0088225	5.36381e-06	0.0145628	0.397034	4.89639e-06	1.54618e-05	0.00153111	4.00704e-05	0.000794348	0.000490528	1.90575e-06	1.29061e-06
H12	0.000786384	0.0258447	0.00849774	3.87934e-05	0.463955	4.73242e-05	0.0181396	2.97811e-05	0.00647495	1.41315e-05	4.89639e-06	0.398205	0.0144358	2.54007e-06	0.00509337	6.84129e-07	1.86394e-06	0.00431897	0.000488605
H13	0.00941041	0.0292251	0.00593924	0.000261611	0.460193	0.000152518	0.0188022	0.000123287	0.00921271	5.60317e-05	1.54618e-05	0.0144358	0.384413	1.15899e-05	0.00107397	7.63214e-06	1.0278e-05	0.000446714	0.00075689
H14	0.00619076	0.000303015	0.000502959	0.0199969	1.22324e-05	0.47349	2.8157e-06	0.029034	2.14846e-06	0.00502073	0.00153111	2.54007e-06	1.15899e-05	0.412081	7.53407e-07	0.00363688	0.00673752	1.78458e-07	1.99716e-07
H15	0.000398824	0.00369604	0.0116095	0.000183001	0.0191929	3.43419e-05	0.4695	2.52656e-05	0.0287433	1.02445e-05	4.00704e-05	0.00509337	0.00107397	7.53407e-07	0.401722	5.32412e-07	6.08853e-06	0.00661932	0.00360596
H16	0.00154472	5.18311e-05	0.000374942	0.0062825	5.0211e-06	0.0302003	1.07212e-06	0.483694	5.32301e-07	0.000444528	0.000794348	6.84129e-07	7.63214e-06	0.00363688	5.32412e-07	0.410416	0.0167258	4.60715e-08	4.78033e-08
H17	0.00131571	0.000896649	0.00248857	0.00630798	6.76446e-05	0.029967	2.36543e-05	0.480059	1.94555e-05	0.00405802	0.000490528	1.86394e-06	1.0278e-05	0.00673752	6.08853e-06	0.0167258	0.410095	7.10988e-07	1.30549e-06
H18	4.15959e-05	0.000962449	0.000440901	9.5625e-06	0.00638569	3.09986e-06	0.0307371	2.05822e-06	0.481872	3.1483e-06	1.90575e-06	0.00431897	0.000446714	1.78458e-07	0.00661932	4.60715e-08	7.10988e-07	0.417266	0.0170053
H19	4.64333e-05	0.0015148	0.000204764	8.09158e-06	0.00633516	2.25828e-06	0.0304371	1.50939e-06	0.483852	7.21024e-06	1.29061e-06	0.000488605	0.00075689	1.99716e-07	0.00360596	4.78033e-08	1.30549e-06	0.0170053	0.410963
																				0
LDM — diallyl_trisulfide_10_LIDI_matrix
	S1	S2	S3	C4	C5	C6	C7	C8	C9	H10	H11	H12	H13	H14	H15	H16	H17	H18	H19
S1	14.6337	0.0765515	0.653157	0.527596	0.00453728	0.0382901	0.00108221	0.0214842	0.00087629	0.0293745	0.0269904	0.00570852	0.000619941	0.00611452	0.000150137	0.00129311	0.00151273	4.98163e-05	5.64206e-05		71.9879	22.012
S2	0.0765515	14.5999	0.648268	0.00340581	0.525742	0.012284	0.0425926	0.00954918	0.0207372	0.000515993	0.00099983	0.0280736	0.0291612	0.00324541	0.00579856	0.000365136	0.00067564	0.00125737	0.00110184
S3	0.653157	0.648268	14.5936	0.0380095	0.0383843	0.012062	0.00933569	0.00938121	0.00498381	0.00588581	0.00839339	0.00758489	0.00503342	0.000631429	0.000528394	0.00225752	0.000319464	0.000243746	0.000470445
C4	0.527596	0.00340581	0.0380095	4.01158	0.000612334	0.517202	9.76825e-05	0.0370592	8.12386e-05	0.463776	0.463712	0.000250985	9.13954e-05	0.0198309	1.18652e-05	0.00639714	0.00627911	4.20734e-06	6.88774e-06
C5	0.00453728	0.525742	0.0383843	0.000612334	4.01104	0.000455141	0.515464	0.000724442	0.0374191	0.000114828	0.000130033	0.46218	0.465418	7.83276e-05	0.0196319	5.33254e-05	5.09362e-05	0.0063257	0.00635048
C6	0.0382901	0.012284	0.012062	0.517202	0.000455141	3.96434	3.80336e-05	0.914213	2.43317e-05	0.0183629	0.0191985	6.62769e-05	0.000149553	0.472105	1.10412e-05	0.0300416	0.030159	2.53683e-06	1.38083e-06
C7	0.00108221	0.0425926	0.00933569	9.76825e-05	0.515464	3.80336e-05	3.97781	3.96439e-05	0.921051	2.51126e-05	2.56599e-05	0.0189673	0.0182464	1.38871e-05	0.473458	8.25777e-06	3.99561e-06	0.0302141	0.0302221
C8	0.0214842	0.00954918	0.00938121	0.0370592	0.000724442	0.914213	3.96439e-05	4.07613	3.48044e-05	0.00641407	0.00946814	5.46545e-05	0.000138339	0.0285687	9.43544e-06	0.480375	0.48334	2.22581e-06	2.30617e-06
C9	0.00087629	0.0207372	0.00498381	8.12386e-05	0.0374191	2.43317e-05	0.921051	3.48044e-05	4.08045	2.57649e-05	1.63814e-05	0.00900862	0.00639732	5.21266e-06	0.0294315	4.49899e-06	4.32063e-06	0.480782	0.483561
H10	0.0293745	0.000515993	0.00588581	0.463776	0.000114828	0.0183629	2.51126e-05	0.00641407	2.57649e-05	0.39456	0.0146427	0.000101548	7.90639e-06	0.005174	2.98804e-06	0.0043227	0.000465804	1.20205e-06	2.19144e-06
H11	0.0269904	0.00099983	0.00839339	0.463712	0.000130033	0.0191985	2.56599e-05	0.00946814	1.63814e-05	0.0146427	0.39697	1.8615e-05	2.4175e-05	0.00137978	3.72219e-06	0.000502954	0.000788347	9.99832e-07	1.92269e-06
H12	0.00570852	0.0280736	0.00758489	0.000250985	0.46218	6.62769e-05	0.0189673	5.46545e-05	0.00900862	0.000101548	1.8615e-05	0.390101	0.0148278	1.79444e-05	0.0016638	5.38958e-06	4.66741e-06	0.000528291	0.000804167
H13	0.000619941	0.0291612	0.00503342	9.13954e-05	0.465418	0.000149553	0.0182464	0.000138339	0.00639732	7.90639e-06	2.4175e-05	0.0148278	0.398339	4.76631e-05	0.00505847	6.3851e-06	9.47034e-06	0.00401701	0.000464962
H14	0.00611452	0.00324541	0.000631429	0.0198309	7.83276e-05	0.472105	1.38871e-05	0.0285687	5.21266e-06	0.005174	0.00137978	1.79444e-05	4.76631e-05	0.408819	8.00456e-06	0.00672394	0.0036172	1.05745e-06	2.90625e-07
H15	0.000150137	0.00579856	0.000528394	1.18652e-05	0.0196319	1.10412e-05	0.473458	9.43544e-06	0.0294315	2.98804e-06	3.72219e-06	0.0016638	0.00505847	8.00456e-06	0.409827	6.65889e-07	7.54259e-07	0.00677023	0.00364997
H16	0.00129311	0.000365136	0.00225752	0.00639714	5.33254e-05	0.0300416	8.25777e-06	0.480375	4.49899e-06	0.0043227	0.000502954	5.38958e-06	6.3851e-06	0.00672394	6.65889e-07	0.411192	0.0167384	2.66274e-07	5.99138e-07
H17	0.00151273	0.00067564	0.000319464	0.00627911	5.09362e-05	0.030159	3.99561e-06	0.48334	4.32063e-06	0.000465804	0.000788347	4.66741e-06	9.47034e-06	0.0036172	7.54259e-07	0.0167384	0.409259	2.13303e-07	2.01254e-07
H18	4.98163e-05	0.00125737	0.000243746	4.20734e-06	0.0063257	2.53683e-06	0.0302141	2.22581e-06	0.480782	1.20205e-06	9.99832e-07	0.000528291	0.00401701	1.05745e-06	0.00677023	2.66274e-07	2.13303e-07	0.410887	0.0167772
H19	5.64206e-05	0.00110184	0.000470445	6.88774e-06	0.00635048	1.38083e-06	0.0302221	2.30617e-06	0.483561	2.19144e-06	1.92269e-06	0.000804167	0.000464962	2.90625e-07	0.00364997	5.99138e-07	2.01254e-07	0.0167772	0.409479
																				0
LDM — diallyl_trisulfide_11_LIDI_matrix
	S1	S2	S3	C4	C5	C6	C7	C8	C9	H10	H11	H12	H13	H14	H15	H16	H17	H18	H19
S1	14.6338	0.0765612	0.653348	0.527489	0.00453947	0.0382826	0.00108231	0.0214918	0.000876476	0.0294064	0.0269971	0.00570852	0.000620214	0.0061169	0.000150149	0.00151301	0.00129408	4.9829e-05	5.64582e-05		71.9879	22.0128
S2	0.0765612	14.5999	0.648381	0.00340327	0.525773	0.0122829	0.0425862	0.00954893	0.0207367	0.000516042	0.000999982	0.0280675	0.0291687	0.00324535	0.00579884	0.000675678	0.00036518	0.00125735	0.00110186
S3	0.653348	0.648381	14.5937	0.0380257	0.0384168	0.0120721	0.00933535	0.00937869	0.00498398	0.0058874	0.00839365	0.00758665	0.00503465	0.000635774	0.000528469	0.000319817	0.00225795	0.000243765	0.000470487
C4	0.527489	0.00340327	0.0380257	4.01129	0.000612846	0.517189	9.77083e-05	0.03705	8.12468e-05	0.463739	0.463655	0.000250833	9.13941e-05	0.0198198	1.18623e-05	0.00627823	0.00639657	4.20778e-06	6.89236e-06
C5	0.00453947	0.525773	0.0384168	0.000612846	4.01121	0.000455262	0.515487	0.000724325	0.0374175	0.000114899	0.000130057	0.462215	0.465445	7.83693e-05	0.0196555	5.09426e-05	5.3345e-05	0.00632644	0.00635034
C6	0.0382826	0.0122829	0.0120721	0.517189	0.000455262	3.96425	3.80512e-05	0.9142	2.43192e-05	0.0183726	0.0191972	6.62427e-05	0.000149627	0.472081	1.10556e-05	0.0301617	0.0300473	2.53759e-06	1.38103e-06
C7	0.00108231	0.0425862	0.00933535	9.77083e-05	0.515487	3.80512e-05	3.97778	3.9585e-05	0.921083	2.51231e-05	2.56548e-05	0.0189644	0.0182523	1.38806e-05	0.473443	3.99496e-06	8.2577e-06	0.0302184	0.0302252
C8	0.0214918	0.00954893	0.00937869	0.03705	0.000724325	0.9142	3.9585e-05	4.07607	3.47888e-05	0.00640951	0.00946769	5.46404e-05	0.000138326	0.0285701	9.43362e-06	0.483348	0.480347	2.22474e-06	2.30273e-06
C9	0.000876476	0.0207367	0.00498398	8.12468e-05	0.0374175	2.43192e-05	0.921083	3.47888e-05	4.08057	2.57743e-05	1.63815e-05	0.00901017	0.00640705	5.21307e-06	0.0294369	4.32112e-06	4.49937e-06	0.480803	0.483586
H10	0.0294064	0.000516042	0.0058874	0.463739	0.000114899	0.0183726	2.51231e-05	0.00640951	2.57743e-05	0.394556	0.0146426	0.000101543	7.9076e-06	0.00517406	2.98807e-06	0.000465839	0.00432274	1.20243e-06	2.19238e-06
H11	0.0269971	0.000999982	0.00839365	0.463655	0.000130057	0.0191972	2.56548e-05	0.00946769	1.63815e-05	0.0146426	0.396966	1.86145e-05	2.4175e-05	0.0013798	3.72219e-06	0.000788323	0.00050296	9.99845e-07	1.92262e-06
H12	0.00570852	0.0280675	0.00758665	0.000250833	0.462215	6.62427e-05	0.0189644	5.46404e-05	0.00901017	0.000101543	1.86145e-05	0.390099	0.0148279	1.79434e-05	0.00166382	4.66776e-06	5.38977e-06	0.000528281	0.000804157
H13	0.000620214	0.0291687	0.00503465	9.13941e-05	0.465445	0.000149627	0.0182523	0.000138326	0.00640705	7.9076e-06	2.4175e-05	0.0148279	0.398344	4.76638e-05	0.00505851	9.47124e-06	6.38523e-06	0.00401713	0.000464978
H14	0.0061169	0.00324535	0.000635774	0.0198198	7.83693e-05	0.472081	1.38806e-05	0.0285701	5.21307e-06	0.00517406	0.0013798	1.79434e-05	4.76638e-05	0.408821	8.00402e-06	0.0036174	0.00672392	1.05751e-06	2.90668e-07
H15	0.000150149	0.00579884	0.000528469	1.18623e-05	0.0196555	1.10556e-05	0.473443	9.43362e-06	0.0294369	2.98807e-06	3.72219e-06	0.00166382	0.00505851	8.00402e-06	0.409825	7.54297e-07	6.65975e-07	0.00677021	0.00364989
H16	0.00151301	0.000675678	0.000319817	0.00627823	5.09426e-05	0.0301617	3.99496e-06	0.483348	4.32112e-06	0.000465839	0.000788323	4.66776e-06	9.47124e-06	0.0036174	7.54297e-07	0.409259	0.0167382	2.13354e-07	2.01295e-07
H17	0.00129408	0.00036518	0.00225795	0.00639657	5.3345e-05	0.0300473	8.2577e-06	0.480347	4.49937e-06	0.00432274	0.00050296	5.38977e-06	6.38523e-06	0.00672392	6.65975e-07	0.0167382	0.411188	2.66252e-07	5.99205e-07
H18	4.9829e-05	0.00125735	0.000243765	4.20778e-06	0.00632644	2.53759e-06	0.0302184	2.22474e-06	0.480803	1.20243e-06	9.99845e-07	0.000528281	0.00401713	1.05751e-06	0.00677021	2.13354e-07	2.66252e-07	0.410889	0.016777
H19	5.64582e-05	0.00110186	0.000470487	6.89236e-06	0.00635034	1.38103e-06	0.0302252	2.30273e-06	0.483586	2.19238e-06	1.92262e-06	0.000804157	0.000464978	2.90668e-07	0.00364989	2.01295e-07	5.99205e-07	0.016777	0.409482
																				0
LDM — diallyl_trisulfide_12_LIDI_matrix
	S1	S2	S3	C4	C5	C6	C7	C8	C9	H10	H11	H12	H13	H14	H15	H16	H17	H18	H19
S1	14.5988	0.0768214	0.648804	0.529326	0.00341808	0.0414229	0.012253	0.0210331	0.00941644	0.0258989	0.0294277	0.000519758	0.00100627	0.0036637	0.00325954	0.000962964	0.0015057	0.00035982	0.000660588		71.9753	22.0255
S2	0.0768214	14.6327	0.652973	0.00485542	0.52738	0.000870703	0.0382102	0.000389545	0.0214751	0.000751672	0.00623272	0.0293628	0.0269946	0.00043427	0.00609516	4.25773e-05	4.2377e-05	0.00129272	0.00151367
S3	0.648804	0.652973	14.5832	0.0375357	0.0378081	0.00887653	0.0121321	0.00167838	0.00944443	0.00849741	0.00648691	0.00586041	0.00835116	0.0117438	0.000633775	0.000443519	0.000198356	0.00226382	0.000321456
C4	0.529326	0.00485542	0.0375357	4.01417	0.000577665	0.515854	0.000401105	0.0371482	0.000657711	0.463985	0.461731	0.000119478	0.000121398	0.0191881	6.98919e-05	0.00638312	0.00633476	5.17332e-05	4.58369e-05
C5	0.00341808	0.52738	0.0378081	0.000577665	4.01139	0.000128383	0.517176	5.33004e-05	0.0370909	6.46757e-05	0.000262374	0.463681	0.463612	0.000185647	0.0198109	9.99309e-06	6.48655e-06	0.00641216	0.00628149
C6	0.0414229	0.000870703	0.00887653	0.515854	0.000128383	3.97255	0.000157506	0.924089	0.000148237	0.0182369	0.0190259	1.13397e-05	3.4172e-05	0.469579	4.46726e-05	0.0307486	0.0304652	7.52845e-06	1.03007e-05
C7	0.012253	0.0382102	0.0121321	0.000401105	0.517176	0.000157506	3.96433	9.43852e-05	0.914171	1.70188e-05	6.42646e-05	0.018361	0.0191846	3.52094e-05	0.472049	4.27495e-06	7.93363e-06	0.0300335	0.0301608
C8	0.0210331	0.000389545	0.00167838	0.0371482	5.33004e-05	0.924089	9.43852e-05	4.08318	0.00013287	0.00652557	0.00926661	8.6275e-06	1.26936e-05	0.0288025	2.01774e-05	0.481947	0.483946	5.63904e-06	9.02657e-06
C9	0.00941644	0.0214751	0.00944443	0.000657711	0.0370909	0.000148237	0.914171	0.00013287	4.07612	1.43745e-05	4.78588e-05	0.00642536	0.00947504	1.6288e-05	0.0285531	6.45398e-06	1.20876e-05	0.480335	0.483362
H10	0.0258989	0.000751672	0.00849741	0.463985	6.46757e-05	0.0182369	1.70188e-05	0.00652557	1.43745e-05	0.39912	0.0145578	2.20478e-05	1.6189e-05	0.00510307	6.69934e-06	0.0043442	0.000491815	6.39043e-06	9.6823e-07
H11	0.0294277	0.00623272	0.00648691	0.461731	0.000262374	0.0190259	6.42646e-05	0.00926661	4.78588e-05	0.0145578	0.388474	0.00010753	2.02031e-05	0.00109325	2.07346e-05	0.000449023	0.000764973	4.89482e-06	4.04411e-06
H12	0.000519758	0.0293628	0.00586041	0.000119478	0.463681	1.13397e-05	0.018361	8.6275e-06	0.00642536	2.20478e-05	0.00010753	0.394383	0.0146321	1.01053e-05	0.00516973	1.14551e-06	1.01164e-06	0.00432815	0.000466448
H13	0.00100627	0.0269946	0.00835116	0.000121398	0.463612	3.4172e-05	0.0191846	1.26936e-05	0.00947504	1.6189e-05	2.02031e-05	0.0146321	0.396676	4.00728e-05	0.00137613	2.8893e-06	2.71656e-06	0.000503724	0.000787879
H14	0.0036637	0.00043427	0.0117438	0.0191881	0.000185647	0.469579	3.52094e-05	0.0288025	1.6288e-05	0.00510307	0.00109325	1.01053e-05	4.00728e-05	0.402511	1.84454e-06	0.00662907	0.00361319	4.73161e-06	5.76191e-07
H15	0.00325954	0.00609516	0.000633775	6.98919e-05	0.0198109	4.46726e-05	0.472049	2.01774e-05	0.0285531	6.69934e-06	2.07346e-05	0.00516973	0.00137613	1.84454e-06	0.408506	9.52461e-07	2.06492e-06	0.00671795	0.00361345
H16	0.000962964	4.25773e-05	0.000443519	0.00638312	9.99309e-06	0.0307486	4.27495e-06	0.481947	6.45398e-06	0.0043442	0.000449023	1.14551e-06	2.8893e-06	0.00662907	9.52461e-07	0.417494	0.0170279	6.19388e-07	3.83105e-07
H17	0.0015057	4.2377e-05	0.000198356	0.00633476	6.48655e-06	0.0304652	7.93363e-06	0.483946	1.20876e-05	0.000491815	0.000764973	1.01164e-06	2.71656e-06	0.00361319	2.06492e-06	0.0170279	0.411461	7.15957e-07	7.99413e-07
H18	0.00035982	0.00129272	0.00226382	5.17332e-05	0.00641216	7.52845e-06	0.0300335	5.63904e-06	0.480335	6.39043e-06	4.89482e-06	0.00432815	0.000503724	4.73161e-06	0.00671795	6.19388e-07	7.15957e-07	0.411023	0.0167347
H19	0.000660588	0.00151367	0.000321456	4.58369e-05	0.00628149	1.03007e-05	0.0301608	9.02657e-06	0.483362	9.6823e-07	4.04411e-06	0.000466448	0.000787879	5.76191e-07	0.00361345	3.83105e-07	7.99413e-07	0.0167347	0.409311
																				0
LDM — diallyl_trisulfide_13_LIDI_matrix
	S1	S2	S3	C4	C5	C6	C7	C8	C9	H10	H11	H12	H13	H14	H15	H16	H17	H18	H19
S1	14.5987	0.0768914	0.648662	0.529498	0.00342237	0.0413978	0.0122683	0.0210325	0.00941689	0.029441	0.0258934	0.000520485	0.00100622	0.00365944	0.00325949	0.00096279	0.0015059	0.000660543	0.000359736		71.9754	22.0264
S2	0.0768914	14.6329	0.653103	0.00486456	0.52758	0.000869998	0.038312	0.000389616	0.0215143	0.00623298	0.000752022	0.0293797	0.0270023	0.000434848	0.00609992	4.2609e-05	4.23947e-05	0.00151466	0.00129451
S3	0.648662	0.653103	14.5831	0.0375498	0.0378266	0.00885057	0.0121277	0.00167809	0.00942204	0.00649387	0.008498	0.00585846	0.00835113	0.011744	0.000632823	0.000443543	0.000198381	0.000321335	0.00226356
C4	0.529498	0.00486456	0.0375498	4.0143	0.000578306	0.51585	0.000402032	0.0371645	0.000657758	0.461801	0.463915	0.000119497	0.000121459	0.0192052	7.00425e-05	0.00637706	0.00633478	4.58488e-05	5.17339e-05
C5	0.00342237	0.52758	0.0378266	0.000578306	4.01154	0.000128013	0.51723	5.33216e-05	0.0370692	0.00026252	6.47426e-05	0.463702	0.463625	0.000185694	0.0198228	9.99636e-06	6.48933e-06	0.00628135	0.00640986
C6	0.0413978	0.000869998	0.00885057	0.51585	0.000128013	3.97238	0.000157696	0.924002	0.000148224	0.0190228	0.0181831	1.13022e-05	3.40983e-05	0.469555	4.46643e-05	0.0307043	0.0304567	1.02989e-05	7.51214e-06
C7	0.0122683	0.038312	0.0121277	0.000402032	0.51723	0.000157696	3.96443	9.45181e-05	0.914195	6.43467e-05	1.70251e-05	0.0183722	0.019184	3.52241e-05	0.472064	4.28004e-06	7.94698e-06	0.0301618	0.0300523
C8	0.0210325	0.000389616	0.00167809	0.0371645	5.33216e-05	0.924002	9.45181e-05	4.08314	0.000132897	0.00926617	0.00651814	8.62367e-06	1.26925e-05	0.0288074	2.01753e-05	0.481928	0.483947	9.02624e-06	5.63817e-06
C9	0.00941689	0.0215143	0.00942204	0.000657758	0.0370692	0.000148224	0.914195	0.000132897	4.07597	4.78257e-05	1.43349e-05	0.00640436	0.00947363	1.62415e-05	0.0285499	6.45195e-06	1.20897e-05	0.483366	0.480274
H10	0.029441	0.00623298	0.00649387	0.461801	0.00026252	0.0190228	6.43467e-05	0.00926617	4.78257e-05	0.388478	0.0145579	0.000107529	2.0203e-05	0.00109328	2.07342e-05	0.000449034	0.000764963	4.04422e-06	4.89454e-06
H11	0.0258934	0.000752022	0.008498	0.463915	6.47426e-05	0.0181831	1.70251e-05	0.00651814	1.43349e-05	0.0145579	0.399118	2.20355e-05	1.61887e-05	0.00510311	6.69918e-06	0.00434438	0.00049182	9.68232e-07	6.39022e-06
H12	0.000520485	0.0293797	0.00585846	0.000119497	0.463702	1.13022e-05	0.0183722	8.62367e-06	0.00640436	0.000107529	2.20355e-05	0.394385	0.0146322	1.01009e-05	0.0051697	1.14503e-06	1.01125e-06	0.000466403	0.0043279
H13	0.00100622	0.0270023	0.00835113	0.000121459	0.463625	3.40983e-05	0.019184	1.26925e-05	0.00947363	2.0203e-05	1.61887e-05	0.0146322	0.39668	4.00762e-05	0.00137614	2.88932e-06	2.71668e-06	0.000787909	0.000503711
H14	0.00365944	0.000434848	0.011744	0.0192052	0.000185694	0.469555	3.52241e-05	0.0288074	1.62415e-05	0.00109328	0.00510311	1.01009e-05	4.00762e-05	0.402513	1.84456e-06	0.00662913	0.00361319	5.76151e-07	4.73145e-06
H15	0.00325949	0.00609992	0.000632823	7.00425e-05	0.0198228	4.46643e-05	0.472064	2.01753e-05	0.0285499	2.07342e-05	6.69918e-06	0.0051697	0.00137614	1.84456e-06	0.408505	9.52573e-07	2.0647e-06	0.00361339	0.00671795
H16	0.00096279	4.2609e-05	0.000443543	0.00637706	9.99636e-06	0.0307043	4.28004e-06	0.481928	6.45195e-06	0.000449034	0.00434438	1.14503e-06	2.88932e-06	0.00662913	9.52573e-07	0.417492	0.0170281	3.83139e-07	6.19297e-07
H17	0.0015059	4.23947e-05	0.000198381	0.00633478	6.48933e-06	0.0304567	7.94698e-06	0.483947	1.20897e-05	0.000764963	0.00049182	1.01125e-06	2.71668e-06	0.00361319	2.0647e-06	0.0170281	0.411457	7.99448e-07	7.15905e-07
H18	0.000660543	0.00151466	0.000321335	4.58488e-05	0.00628135	1.02989e-05	0.0301618	9.02624e-06	0.483366	4.04422e-06	9.68232e-07	0.000466403	0.000787909	5.76151e-07	0.00361339	3.83139e-07	7.99448e-07	0.409311	0.0167348
H19	0.000359736	0.00129451	0.00226356	5.17339e-05	0.00640986	7.51214e-06	0.0300523	5.63817e-06	0.480274	4.89454e-06	6.39022e-06	0.0043279	0.000503711	4.73145e-06	0.00671795	6.19297e-07	7.15905e-07	0.0167348	0.411024
																				0
LDM — diallyl_trisulfide_14_LIDI_matrix
	S1	S2	S3	C4	C5	C6	C7	C8	C9	H10	H11	H12	H13	H14	H15	H16	H17	H18	H19
S1	14.5988	0.0752302	0.652898	0.528697	0.00330426	0.0413484	0.0118406	0.0209692	0.00959249	0.0259979	0.0293002	0.00100241	0.000500688	0.00307255	0.00287517	0.00146943	0.000990789	0.000364303	0.000668963		71.9687	22.0309
S2	0.0752302	14.6244	0.652185	0.00321464	0.527231	0.00608871	0.038534	0.00127154	0.021508	0.00119481	0.000544349	0.0270112	0.0292331	0.0106846	0.00618502	0.000109799	0.000236895	0.00130122	0.00151002
S3	0.652898	0.652185	14.5867	0.0382068	0.0379965	0.00538663	0.0120761	0.00176823	0.00930529	0.00762847	0.0106991	0.00837374	0.0060736	0.00474198	0.000619097	0.000200982	0.000314764	0.00226581	0.000324531
C4	0.528697	0.00321464	0.0382068	4.01348	0.000610933	0.515919	0.0004779	0.0372042	0.000757901	0.464111	0.462267	0.000159163	9.4116e-05	0.0191485	7.50583e-05	0.00633845	0.00642557	5.32842e-05	5.09111e-05
C5	0.00330426	0.527231	0.0379965	0.000610933	4.01151	0.000208786	0.517035	8.08178e-05	0.0370611	0.0001588	0.000146163	0.463592	0.463675	0.000542176	0.0197677	4.63329e-06	1.38362e-05	0.00639699	0.00628128
C6	0.0413484	0.00608871	0.00538663	0.515919	0.000208786	3.97181	7.9322e-05	0.923406	6.10206e-05	0.0184084	0.019068	1.72335e-05	8.25264e-05	0.468616	4.96418e-05	0.0304196	0.0307506	5.32705e-06	5.39622e-06
C7	0.0118406	0.038534	0.0120761	0.0004779	0.517035	7.9322e-05	3.96507	2.76756e-05	0.914259	3.13932e-05	0.000145841	0.0191681	0.0183397	6.1627e-05	0.471862	1.74809e-06	2.32364e-06	0.0300507	0.0301595
C8	0.0209692	0.00127154	0.00176823	0.0372042	8.08178e-05	0.923406	2.76756e-05	4.08413	5.39768e-05	0.00659272	0.00926423	7.71243e-06	2.7182e-05	0.0286588	1.26886e-05	0.483989	0.48189	3.13169e-06	5.87921e-06
C9	0.00959249	0.021508	0.00930529	0.000757901	0.0370611	6.10206e-05	0.914259	5.39768e-05	4.07678	3.37658e-05	0.000139271	0.00944837	0.00640123	4.54557e-05	0.0285171	2.86887e-06	3.44424e-06	0.480414	0.483368
H10	0.0259979	0.00119481	0.00762847	0.464111	0.0001588	0.0184084	3.13932e-05	0.00659272	3.37658e-05	0.399449	0.0144139	4.50518e-05	2.29071e-05	0.00505443	5.02132e-06	0.000493123	0.00443292	8.15632e-06	1.56478e-06
H11	0.0293002	0.000544349	0.0106991	0.462267	0.000146163	0.019068	0.000145841	0.00926423	0.000139271	0.0144139	0.388167	2.98788e-05	1.1146e-05	0.00116288	4.17615e-05	0.000771224	0.000451956	7.37538e-06	1.0518e-05
H12	0.00100241	0.0270112	0.00837374	0.000159163	0.463592	1.72335e-05	0.0191681	7.71243e-06	0.00944837	4.50518e-05	2.98788e-05	0.396574	0.0146199	1.3136e-05	0.00136771	6.24737e-07	1.59451e-06	0.000500438	0.00078684
H13	0.000500688	0.0292331	0.0060736	9.4116e-05	0.463675	8.25264e-05	0.0183397	2.7182e-05	0.00640123	2.29071e-05	1.1146e-05	0.0146199	0.394362	0.000174782	0.00515987	2.33632e-06	4.47274e-06	0.00431295	0.000464053
H14	0.00307255	0.0106846	0.00474198	0.0191485	0.000542176	0.468616	6.1627e-05	0.0286588	4.54557e-05	0.00505443	0.00116288	1.3136e-05	0.000174782	0.40091	1.88095e-05	0.00359758	0.00659786	4.47941e-06	2.89228e-06
H15	0.00287517	0.00618502	0.000619097	7.50583e-05	0.0197677	4.96418e-05	0.471862	1.26886e-05	0.0285171	5.02132e-06	4.17615e-05	0.00136771	0.00515987	1.88095e-05	0.407173	7.62367e-07	5.95911e-07	0.00671179	0.00360978
H16	0.00146943	0.000109799	0.000200982	0.00633845	4.63329e-06	0.0304196	1.74809e-06	0.483989	2.86887e-06	0.000493123	0.000771224	6.24737e-07	2.33632e-06	0.00359758	7.62367e-07	0.411403	0.0170306	2.38776e-07	3.71981e-07
H17	0.000990789	0.000236895	0.000314764	0.00642557	1.38362e-05	0.0307506	2.32364e-06	0.48189	3.44424e-06	0.00443292	0.000451956	1.59451e-06	4.47274e-06	0.00659786	5.95911e-07	0.0170306	0.417587	3.63893e-07	2.63165e-07
H18	0.000364303	0.00130122	0.00226581	5.32842e-05	0.00639699	5.32705e-06	0.0300507	3.13169e-06	0.480414	8.15632e-06	7.37538e-06	0.000500438	0.00431295	4.47941e-06	0.00671179	2.38776e-07	3.63893e-07	0.411271	0.016745
H19	0.000668963	0.00151002	0.000324531	5.09111e-05	0.00628128	5.39622e-06	0.0301595	5.87921e-06	0.483368	1.56478e-06	1.0518e-05	0.00078684	0.000464053	2.89228e-06	0.00360978	3.71981e-07	2.63165e-07	0.016745	0.40919
																				0
LDM — diallyl_trisulfide_15_LIDI_matrix
	S1	S2	S3	C4	C5	C6	C7	C8	C9	H10	H11	H12	H13	H14	H15	H16	H17	H18	H19
S1	14.6244	0.0752303	0.652184	0.527231	0.00321465	0.0385341	0.00608874	0.021508	0.00127155	0.0270112	0.029233	0.000544348	0.00119481	0.00618509	0.0106846	0.00151002	0.00130122	0.000236895	0.0001098		71.9687	22.0309
S2	0.0752303	14.5988	0.652899	0.00330397	0.528696	0.0118405	0.0413484	0.00959244	0.0209691	0.00100242	0.000500684	0.0293001	0.0259979	0.00287512	0.00307258	0.000668951	0.000364301	0.000990786	0.00146944
S3	0.652184	0.652899	14.5867	0.0379963	0.0382068	0.012076	0.00538674	0.00930515	0.00176824	0.00837373	0.00607368	0.010699	0.00762847	0.000619103	0.00474215	0.00032453	0.00226577	0.000314769	0.000200983
C4	0.527231	0.00330397	0.0379963	4.01151	0.00061092	0.517035	0.000208787	0.037061	8.08183e-05	0.463592	0.463675	0.000146155	0.000158799	0.0197677	0.000542181	0.00628127	0.00639697	1.38363e-05	4.63338e-06
C5	0.00321465	0.528696	0.0382068	0.00061092	4.01348	0.000477899	0.515919	0.000757899	0.0372043	0.000159164	9.41172e-05	0.462267	0.464111	7.50568e-05	0.0191485	5.09101e-05	5.32835e-05	0.00642558	0.00633845
C6	0.0385341	0.0118405	0.012076	0.517035	0.000477899	3.96507	7.93213e-05	0.914259	2.76752e-05	0.0191681	0.0183397	0.00014584	3.13924e-05	0.471862	6.16275e-05	0.0301595	0.0300507	2.32355e-06	1.74803e-06
C7	0.00608874	0.0413484	0.00538674	0.000208787	0.515919	7.93213e-05	3.97181	6.10205e-05	0.923406	1.72338e-05	8.2527e-05	0.019068	0.0184083	4.96402e-05	0.468616	5.39607e-06	5.32719e-06	0.0307505	0.0304196
C8	0.021508	0.00959244	0.00930515	0.037061	0.000757899	0.914259	6.10205e-05	4.07678	5.39771e-05	0.00944841	0.00640123	0.00013927	3.37652e-05	0.0285171	4.54565e-05	0.483368	0.480414	3.44418e-06	2.86884e-06
C9	0.00127155	0.0209691	0.00176824	8.08183e-05	0.0372043	2.76752e-05	0.923406	5.39771e-05	4.08413	7.71234e-06	2.71824e-05	0.00926428	0.0065927	1.26881e-05	0.0286588	5.8791e-06	3.13181e-06	0.481891	0.483989
H10	0.0270112	0.00100242	0.00837373	0.463592	0.000159164	0.0191681	1.72338e-05	0.00944841	7.71234e-06	0.396574	0.0146198	2.98786e-05	4.5052e-05	0.0013677	1.31363e-05	0.00078684	0.000500438	1.59438e-06	6.24643e-07
H11	0.029233	0.000500684	0.00607368	0.463675	9.41172e-05	0.0183397	8.2527e-05	0.00640123	2.71824e-05	0.0146198	0.394361	1.1146e-05	2.29071e-05	0.00515987	0.000174781	0.000464053	0.00431296	4.47291e-06	2.33638e-06
H12	0.000544348	0.0293001	0.010699	0.000146155	0.462267	0.00014584	0.019068	0.00013927	0.00926428	2.98786e-05	1.1146e-05	0.388167	0.0144139	4.17608e-05	0.00116286	1.05178e-05	7.3753e-06	0.000451956	0.000771223
H13	0.00119481	0.0259979	0.00762847	0.000158799	0.464111	3.13924e-05	0.0184083	3.37652e-05	0.0065927	4.5052e-05	2.29071e-05	0.0144139	0.399449	5.02116e-06	0.00505443	1.56466e-06	8.15608e-06	0.00443292	0.000493122
H14	0.00618509	0.00287512	0.000619103	0.0197677	7.50568e-05	0.471862	4.96402e-05	0.0285171	1.26881e-05	0.0013677	0.00515987	4.17608e-05	5.02116e-06	0.407173	1.88094e-05	0.00360978	0.00671179	5.95974e-07	7.62365e-07
H15	0.0106846	0.00307258	0.00474215	0.000542181	0.0191485	6.16275e-05	0.468616	4.54565e-05	0.0286588	1.31363e-05	0.000174781	0.00116286	0.00505443	1.88094e-05	0.40091	2.89237e-06	4.47969e-06	0.00659786	0.00359758
H16	0.00151002	0.000668951	0.00032453	0.00628127	5.09101e-05	0.0301595	5.39607e-06	0.483368	5.8791e-06	0.00078684	0.000464053	1.05178e-05	1.56466e-06	0.00360978	2.89237e-06	0.40919	0.016745	2.63116e-07	3.71907e-07
H17	0.00130122	0.000364301	0.00226577	0.00639697	5.32835e-05	0.0300507	5.32719e-06	0.480414	3.13181e-06	0.000500438	0.00431296	7.3753e-06	8.15608e-06	0.00671179	4.47969e-06	0.016745	0.411271	3.63899e-07	2.38771e-07
H18	0.000236895	0.000990786	0.000314769	1.38363e-05	0.00642558	2.32355e-06	0.0307505	3.44418e-06	0.481891	1.59438e-06	4.47291e-06	0.000451956	0.00443292	5.95974e-07	0.00659786	2.63116e-07	3.63899e-07	0.417587	0.0170306
H19	0.0001098	0.00146944	0.000200983	4.63338e-06	0.00633845	1.74803e-06	0.0304196	2.86884e-06	0.483989	6.24643e-07	2.33638e-06	0.000771223	0.000493122	7.62365e-07	0.00359758	3.71907e-07	2.38771e-07	0.0170306	0.411403
																				0
LDM — diallyl_trisulfide_16_LIDI_matrix
	S1	S2	S3	C4	C5	C6	C7	C8	C9	H10	H11	H12	H13	H14	H15	H16	H17	H18	H19
S1	14.6237	0.0763813	0.652967	0.530959	0.00344971	0.03893	0.00140784	0.0199593	0.0011136	0.0275911	0.028898	0.000739411	0.00103429	0.00686622	0.000213297	0.00151374	0.0012516	5.94057e-05	7.97813e-05		71.9746	22.0249
S2	0.0763813	14.6073	0.659506	0.00407597	0.525386	0.00192607	0.044337	0.00151994	0.0212054	0.00140473	0.00067679	0.0277781	0.0281702	0.00048275	0.00633666	0.000378137	0.000167706	0.00126735	0.00111985
S3	0.652967	0.659506	14.595	0.0373332	0.0363274	0.00821065	0.00828621	0.00502786	0.00482568	0.00805584	0.00712137	0.010981	0.00212628	0.000492695	0.000310652	0.000230738	0.00117664	0.000228269	0.000473374
C4	0.530959	0.00407597	0.0373332	4.01327	0.000722427	0.517526	8.08722e-05	0.0367976	5.44916e-05	0.462064	0.463258	0.00018333	0.000434945	0.0196777	1.71239e-05	0.00628961	0.0063888	6.4719e-06	6.04918e-06
C5	0.00344971	0.525386	0.0363274	0.000722427	4.01307	0.00558178	0.515696	0.00826638	0.0374996	0.000145238	7.81022e-05	0.460261	0.457904	0.00049171	0.0195587	0.000991187	0.00035781	0.00640756	0.00633786
C6	0.03893	0.00192607	0.00821065	0.517526	0.00558178	3.96623	0.000547504	0.911436	0.000146127	0.0196859	0.0184359	0.00170219	0.00847897	0.472095	0.00014882	0.0300967	0.0299623	3.19771e-05	1.20222e-05
C7	0.00140784	0.044337	0.00828621	8.08722e-05	0.515696	0.000547504	3.97726	0.000699875	0.920098	2.41936e-05	1.06323e-05	0.0184535	0.0176536	5.0548e-05	0.473152	7.48036e-05	2.75296e-05	0.0302672	0.0301214
C8	0.0199593	0.00151994	0.00502786	0.0367976	0.00826638	0.911436	0.000699875	4.07535	0.000184338	0.0100087	0.00644656	0.00420739	0.0105031	0.0289484	0.000136986	0.482515	0.480154	4.51054e-05	1.83212e-05
C9	0.0011136	0.0212054	0.00482568	5.44916e-05	0.0374996	0.000146127	0.920098	0.000184338	4.08238	1.40469e-05	7.92693e-06	0.00912872	0.00636757	1.79526e-05	0.0292095	3.75669e-05	2.8489e-05	0.481041	0.483569
H10	0.0275911	0.00140473	0.00805584	0.462064	0.000145238	0.0196859	2.41936e-05	0.0100087	1.40469e-05	0.393336	0.014535	5.82189e-05	0.000141961	0.00123086	7.7194e-06	0.000794062	0.000491636	1.59817e-06	8.79724e-07
H11	0.028898	0.00067679	0.00712137	0.463258	7.81022e-05	0.0184359	1.06323e-05	0.00644656	7.92693e-06	0.014535	0.39357	3.35321e-05	4.94282e-05	0.0052032	1.12904e-06	0.000469099	0.00435236	9.72896e-07	5.39952e-07
H12	0.000739411	0.0277781	0.010981	0.00018333	0.460261	0.00170219	0.0184535	0.00420739	0.00912872	5.82189e-05	3.35321e-05	0.387266	0.014446	8.8315e-05	0.00161593	0.00022729	0.000649164	0.000533341	0.000792846
H13	0.00103429	0.0281702	0.00212628	0.000434945	0.457904	0.00847897	0.0176536	0.0105031	0.00636757	0.000141961	4.94282e-05	0.014446	0.386228	0.00123997	0.004799	0.00192947	0.000264434	0.00407553	0.000459997
H14	0.00686622	0.00048275	0.000492695	0.0196777	0.00049171	0.472095	5.0548e-05	0.0289484	1.79526e-05	0.00123086	0.0052032	8.8315e-05	0.00123997	0.409792	2.77314e-05	0.00363488	0.00677869	1.24665e-05	1.40434e-06
H15	0.000213297	0.00633666	0.000310652	1.71239e-05	0.0195587	0.00014882	0.473152	0.000136986	0.0292095	7.7194e-06	1.12904e-06	0.00161593	0.004799	2.77314e-05	0.408385	2.7087e-05	4.08936e-06	0.00676821	0.0036151
H16	0.00151374	0.000378137	0.000230738	0.00628961	0.000991187	0.0300967	7.48036e-05	0.482515	3.75669e-05	0.000794062	0.000469099	0.00022729	0.00192947	0.00363488	2.7087e-05	0.41019	0.0167824	3.33645e-05	3.08848e-06
H17	0.0012516	0.000167706	0.00117664	0.0063888	0.00035781	0.0299623	2.75296e-05	0.480154	2.8489e-05	0.000491636	0.00435236	0.000649164	0.000264434	0.00677869	4.08936e-06	0.0167824	0.410905	2.99939e-06	1.85124e-06
H18	5.94057e-05	0.00126735	0.000228269	6.4719e-06	0.00640756	3.19771e-05	0.0302672	4.51054e-05	0.481041	1.59817e-06	9.72896e-07	0.000533341	0.00407553	1.24665e-05	0.00676821	3.33645e-05	2.99939e-06	0.412437	0.0168151
H19	7.97813e-05	0.00111985	0.000473374	6.04918e-06	0.00633786	1.20222e-05	0.0301214	1.83212e-05	0.483569	8.79724e-07	5.39952e-07	0.000792846	0.000459997	1.40434e-06	0.0036151	3.08848e-06	1.85124e-06	0.0168151	0.409071
																				0
LDM — diallyl_trisulfide_17_LIDI_matrix
	S1	S2	S3	C4	C5	C6	C7	C8	C9	H10	H11	H12	H13	H14	H15	H16	H17	H18	H19
S1	14.6227	0.0790401	0.654133	0.528152	0.00341344	0.0379726	0.0010366	0.0208735	0.000267735	0.0290357	0.0271256	0.000799128	0.00129527	0.00722826	0.000944188	0.00155027	0.00117621	6.20624e-05	4.69681e-05		71.9515	22.0485
S2	0.0790401	14.6176	0.653703	0.00351492	0.52959	0.00110052	0.0404041	0.000586009	0.0206685	0.00141653	0.000949641	0.0256874	0.0297522	0.000216613	0.00330138	2.92658e-05	0.000462389	0.00093367	0.0015285
S3	0.654133	0.653703	14.5659	0.0367141	0.0365597	0.0186228	0.0101386	0.0100442	0.00174344	0.00247337	0.0083608	0.00829655	0.00403856	0.00112311	0.0126706	0.000331956	0.000468143	0.000459931	0.000199227
C4	0.528152	0.00351492	0.0367141	4.0119	0.001948	0.516974	0.000212549	0.0368871	0.000134693	0.462742	0.462384	0.000190616	0.00406843	0.0196483	0.000233461	0.00627166	0.00601001	1.32111e-05	1.27731e-05
C5	0.00341344	0.52959	0.0365597	0.001948	4.00852	0.000573017	0.514866	0.00164129	0.0372719	0.00340592	0.0001929	0.463607	0.459435	8.90629e-05	0.0186898	0.00011278	0.00271173	0.00636004	0.00634084
C6	0.0379726	0.00110052	0.0186228	0.516974	0.000573017	3.96349	0.00112628	0.914217	0.000198678	0.0185214	0.019302	3.29786e-05	0.000853035	0.471898	0.00262821	0.0300408	0.0297036	4.43163e-05	1.67448e-05
C7	0.0010366	0.0404041	0.0101386	0.000212549	0.514866	0.00112628	3.9738	0.00491805	0.922922	0.000252604	6.12345e-05	0.0180641	0.0190911	9.38638e-05	0.464204	0.000186822	0.00390387	0.0306485	0.0303845
C8	0.0208735	0.000586009	0.0100442	0.0368871	0.00164129	0.914217	0.00491805	4.07573	0.000655795	0.00617806	0.00980586	0.00014188	0.00296664	0.0286745	0.00702889	0.48301	0.476292	0.000123153	4.27692e-05
C9	0.000267735	0.0206685	0.00174344	0.000134693	0.0372719	0.000198678	0.922922	0.000655795	4.08266	0.000269197	4.00135e-05	0.00649278	0.00949379	1.61756e-05	0.0280563	2.84959e-05	0.00120125	0.481738	0.483731
H10	0.0290357	0.00141653	0.00247337	0.462742	0.00340592	0.0185214	0.000252604	0.00617806	0.000269197	0.400875	0.0147063	0.000218236	0.0066788	0.00515301	1.86203e-05	0.000438692	0.00388397	1.09675e-05	2.08506e-05
H11	0.0271256	0.000949641	0.0083608	0.462384	0.0001929	0.019302	6.12345e-05	0.00980586	4.00135e-05	0.0147063	0.393161	1.30929e-05	0.000327603	0.00127526	8.49833e-05	0.000762783	0.000480115	2.66002e-06	2.06669e-06
H12	0.000799128	0.0256874	0.00829655	0.000190616	0.463607	3.29786e-05	0.0180641	0.00014188	0.00649278	0.000218236	1.30929e-05	0.397674	0.0145983	7.77706e-06	0.0049967	1.40491e-05	0.000146022	0.00428704	0.000491306
H13	0.00129527	0.0297522	0.00403856	0.00406843	0.459435	0.000853035	0.0190911	0.00296664	0.00949379	0.0066788	0.000327603	0.0145983	0.395793	0.000215183	0.000987055	0.000246405	0.00423377	0.000444986	0.000756845
H14	0.00722826	0.000216613	0.00112311	0.0196483	8.90629e-05	0.471898	9.38638e-05	0.0286745	1.61756e-05	0.00515301	0.00127526	7.77706e-06	0.000215183	0.407017	7.90617e-05	0.00362972	0.00659338	2.43953e-06	1.49767e-06
H15	0.000944188	0.00330138	0.0126706	0.000233461	0.0186898	0.00262821	0.464204	0.00702889	0.0280563	1.86203e-05	8.49833e-05	0.0049967	0.000987055	7.90617e-05	0.390893	0.000424534	0.00184441	0.00641813	0.00354068
H16	0.00155027	2.92658e-05	0.000331956	0.00627166	0.00011278	0.0300408	0.000186822	0.48301	2.84959e-05	0.000438692	0.000762783	1.40491e-05	0.000246405	0.00362972	0.000424534	0.40812	0.0165679	4.94109e-06	2.55876e-06
H17	0.00117621	0.000462389	0.000468143	0.00601001	0.00271173	0.0297036	0.00390387	0.476292	0.00120125	0.00388397	0.000480115	0.000146022	0.00423377	0.00659338	0.00184441	0.0165679	0.408697	5.24036e-05	3.89153e-05
H18	6.20624e-05	0.00093367	0.000459931	1.32111e-05	0.00636004	4.43163e-05	0.0306485	0.000123153	0.481738	1.09675e-05	2.66002e-06	0.00428704	0.000444986	2.43953e-06	0.00641813	4.94109e-06	5.24036e-05	0.416418	0.016979
H19	4.69681e-05	0.0015285	0.000199227	1.27731e-05	0.00634084	1.67448e-05	0.0303845	4.27692e-05	0.483731	2.08506e-05	2.06669e-06	0.000491306	0.000756845	1.49767e-06	0.00354068	2.55876e-06	3.89153e-05	0.016979	0.410618
																				0
LDM — diallyl_trisulfide_18_LIDI_matrix
	S1	S2	S3	C4	C5	C6	C7	C8	C9	H10	H11	H12	H13	H14	H15	H16	H17	H18	H19
S1	14.6144	0.0774749	0.658113	0.524125	0.00377046	0.0438178	0.00355471	0.0209991	0.00204616	0.0288537	0.0253699	0.00128454	0.000629909	0.00664834	0.00108234	0.00124152	0.00119832	0.000210362	0.000196939		71.9651	22.0345
S2	0.0774749	14.6176	0.654566	0.00376264	0.532308	0.000796152	0.0384654	0.000489606	0.0184228	0.00116762	0.00101436	0.0275477	0.0288095	0.000345118	0.00749497	4.6027e-05	4.53071e-05	0.00121829	0.00147347
S3	0.658113	0.654566	14.5911	0.0365632	0.0377506	0.00642893	0.00722867	0.00394759	0.00353802	0.00267077	0.0142511	0.00825634	0.00706195	0.000325345	0.000526817	0.000436001	0.000214515	0.000757353	0.000184874
C4	0.524125	0.00376264	0.0365632	4.02316	0.000657542	0.516386	0.00462056	0.0373671	0.0075733	0.466942	0.449763	0.000146557	7.46261e-05	0.0191126	0.000271016	0.0063671	0.00637175	0.000401316	0.000473677
C5	0.00377046	0.532308	0.0377506	0.000657542	4.0159	0.000204397	0.516723	8.44175e-05	0.0366927	5.2098e-05	0.000515075	0.461463	0.463281	0.000259077	0.0194931	8.79418e-06	6.82186e-06	0.00637345	0.00625022
C6	0.0438178	0.000796152	0.00642893	0.516386	0.000204397	3.9712	0.00252781	0.919806	0.00408677	0.0190147	0.0176757	4.19562e-05	2.33429e-05	0.468528	0.00115373	0.0302683	0.030376	0.000142891	0.00280358
C7	0.00355471	0.0384654	0.00722867	0.00462056	0.516723	0.00252781	3.96715	0.000248153	0.909773	0.000365654	0.00812013	0.0197938	0.0184208	0.00430113	0.470683	2.68267e-05	9.01826e-05	0.0301203	0.0297128
C8	0.0209991	0.000489606	0.00394759	0.0373671	8.44175e-05	0.919806	0.000248153	4.08626	0.000676479	0.00646052	0.0095778	1.39919e-05	1.03656e-05	0.0285622	0.000129725	0.48399	0.481368	7.56655e-05	0.000860883
C9	0.00204616	0.0184228	0.00353802	0.0075733	0.0366927	0.00408677	0.909773	0.000676479	4.07727	0.000409492	0.0153478	0.0104914	0.00643898	0.00392923	0.0285675	4.33456e-05	8.91623e-05	0.480034	0.480675
H10	0.0288537	0.00116762	0.00267077	0.466942	5.2098e-05	0.0190147	0.000365654	0.00646052	0.000409492	0.401864	0.0137412	1.95017e-05	5.10765e-06	0.00522504	6.82414e-05	0.000473979	0.00427851	1.44401e-05	3.37985e-05
H11	0.0253699	0.00101436	0.0142511	0.449763	0.000515075	0.0176757	0.00812013	0.0095778	0.0153478	0.0137412	0.362439	0.000203222	7.03062e-05	0.00131178	0.000207279	0.000734185	0.000474732	0.00140394	0.000792608
H12	0.00128454	0.0275477	0.00825634	0.000146557	0.461463	4.19562e-05	0.0197938	1.39919e-05	0.0104914	1.95017e-05	0.000203222	0.392066	0.0144681	3.52301e-05	0.00106854	1.43904e-06	1.91126e-06	0.00049664	0.00077304
H13	0.000629909	0.0288095	0.00706195	7.46261e-05	0.463281	2.33429e-05	0.0184208	1.03656e-05	0.00643898	5.10765e-06	7.03062e-05	0.0144681	0.393296	7.35927e-05	0.00514657	5.94468e-07	1.18999e-06	0.00432587	0.000468581
H14	0.00664834	0.000345118	0.000325345	0.0191126	0.000259077	0.468528	0.00430113	0.0285622	0.00392923	0.00522504	0.00131178	3.52301e-05	7.35927e-05	0.40493	0.00248685	0.00358358	0.00661667	0.000185559	0.00187007
H15	0.00108234	0.00749497	0.000526817	0.000271016	0.0194931	0.00115373	0.470683	0.000129725	0.0285675	6.82414e-05	0.000207279	0.00106854	0.00514657	0.00248685	0.406718	2.02868e-05	7.1763e-05	0.00676669	0.00359366
H16	0.00124152	4.6027e-05	0.000436001	0.0063671	8.79418e-06	0.0302683	2.68267e-05	0.48399	4.33456e-05	0.000473979	0.000734185	1.43904e-06	5.94468e-07	0.00358358	2.02868e-05	0.410662	0.016878	3.56773e-06	3.04559e-05
H17	0.00119832	4.53071e-05	0.000214515	0.00637175	6.82186e-06	0.030376	9.01826e-05	0.481368	8.91623e-05	0.00427851	0.000474732	1.91126e-06	1.18999e-06	0.00661667	7.1763e-05	0.016878	0.413158	4.38114e-06	5.13833e-05
H18	0.000210362	0.00121829	0.000757353	0.000401316	0.00637345	0.000142891	0.0301203	7.56655e-05	0.480034	1.44401e-05	0.00140394	0.00049664	0.00432587	0.000185559	0.00676669	3.56773e-06	4.38114e-06	0.411172	0.0166255
H19	0.000196939	0.00147347	0.000184874	0.000473677	0.00625022	0.00280358	0.0297128	0.000860883	0.480675	3.37985e-05	0.000792608	0.00077304	0.000468581	0.00187007	0.00359366	3.04559e-05	5.13833e-05	0.0166255	0.404775
																				0
LDM — diallyl_trisulfide_19_LIDI_matrix
	S1	S2	S3	C4	C5	C6	C7	C8	C9	H10	H11	H12	H13	H14	H15	H16	H17	H18	H19
S1	14.6172	0.0784895	0.653645	0.525896	0.00372875	0.0432166	0.00108758	0.0209896	0.000734725	0.0291791	0.0271167	0.000851426	0.00195938	0.0064739	0.000206048	0.00111421	0.00124621	0.000709068	3.24459e-05		71.9712	22.0305
S2	0.0784895	14.6196	0.655257	0.00320135	0.528544	0.00137109	0.0387098	0.00105304	0.0213934	0.000775206	0.000839186	0.0269527	0.028907	0.000224981	0.00716248	7.19144e-05	5.57901e-05	0.00124949	0.00155482
S3	0.653645	0.655257	14.5752	0.0374038	0.0372789	0.00802888	0.0172563	0.00446109	0.0111228	0.00214043	0.0120111	0.00857438	0.00297003	0.000305571	0.000826517	0.000460056	0.000213882	0.000641904	0.00033613
C4	0.525896	0.00320135	0.0374038	4.01032	0.00185171	0.515997	0.000738699	0.0375988	0.00252824	0.463243	0.457949	0.000182322	0.00353462	0.0195536	0.000100396	0.0063415	0.00636567	0.00402856	0.000119008
C5	0.00372875	0.528544	0.0372789	0.00185171	4.01188	0.000244185	0.517022	7.60825e-05	0.0369979	0.00303731	0.000247035	0.462752	0.462211	5.96638e-05	0.0197026	1.12103e-05	1.07308e-05	0.00615751	0.00626691
C6	0.0432166	0.00137109	0.00802888	0.515997	0.000244185	3.97746	7.51168e-05	0.920632	0.000206467	0.0184917	0.0181956	2.19046e-05	0.000413929	0.47269	1.7392e-05	0.030097	0.0303273	0.000327771	8.05812e-06
C7	0.00108758	0.0387098	0.0172563	0.000738699	0.517022	7.51168e-05	3.96367	6.05455e-05	0.916254	0.000322627	0.00137762	0.0192549	0.0184877	5.08367e-06	0.472197	5.43163e-06	3.89983e-06	0.0302016	0.0300342
C8	0.0209896	0.00105304	0.00446109	0.0375988	7.60825e-05	0.920632	6.05455e-05	4.08184	0.000141247	0.00659978	0.00910877	6.82333e-06	6.75936e-05	0.0290404	5.06294e-06	0.483368	0.481016	0.000124251	4.52773e-06
C9	0.000734725	0.0213934	0.0111228	0.00252824	0.0369979	0.000206467	0.916254	0.000141247	4.07901	0.00118725	0.00435905	0.00973332	0.00622655	1.53461e-05	0.0287584	1.22231e-05	7.8837e-06	0.478323	0.483413
H10	0.0291791	0.000775206	0.00214043	0.463243	0.00303731	0.0184917	0.000322627	0.00659978	0.00118725	0.405263	0.0148109	0.000234936	0.00554322	0.00501409	0.00018076	0.000478698	0.00425589	0.00231565	0.000126508
H11	0.0271167	0.000839186	0.0120111	0.457949	0.000247035	0.0181956	0.00137762	0.00910877	0.00435905	0.0148109	0.380747	4.54086e-05	0.00019528	0.00157621	8.64432e-05	0.000768801	0.000525757	0.00364573	0.000144217
H12	0.000851426	0.0269527	0.00857438	0.000182322	0.462752	2.19046e-05	0.0192549	6.82333e-06	0.00973332	0.000234936	4.54086e-05	0.394111	0.0146794	8.45269e-06	0.00129192	5.54768e-07	1.22606e-06	0.000488428	0.000767967
H13	0.00195938	0.028907	0.00297003	0.00353462	0.462211	0.000413929	0.0184877	6.75936e-05	0.00622655	0.00554322	0.00019528	0.0146794	0.398983	0.000150058	0.0051211	5.69098e-06	2.47784e-05	0.00400295	0.00044173
H14	0.0064739	0.000224981	0.000305571	0.0195536	5.96638e-05	0.47269	5.08367e-06	0.0290404	1.53461e-05	0.00501409	0.00157621	8.45269e-06	0.000150058	0.406669	2.86964e-06	0.0036053	0.0067496	4.41071e-05	1.40925e-06
H15	0.000206048	0.00716248	0.000826517	0.000100396	0.0197026	1.7392e-05	0.472197	5.06294e-06	0.0287584	0.00018076	8.64432e-05	0.00129192	0.0051211	2.86964e-06	0.407794	6.66261e-07	7.32144e-07	0.0066365	0.00361384
H16	0.00111421	7.19144e-05	0.000460056	0.0063415	1.12103e-05	0.030097	5.43163e-06	0.483368	1.22231e-05	0.000478698	0.000768801	5.54768e-07	5.69098e-06	0.0036053	6.66261e-07	0.407935	0.0167689	1.09649e-05	3.14613e-07
H17	0.00124621	5.57901e-05	0.000213882	0.00636567	1.07308e-05	0.0303273	3.89983e-06	0.481016	7.8837e-06	0.00425589	0.000525757	1.22606e-06	2.47784e-05	0.0067496	7.32144e-07	0.0167689	0.412407	1.26359e-05	4.33608e-07
H18	0.000709068	0.00124949	0.000641904	0.00402856	0.00615751	0.000327771	0.0302016	0.000124251	0.478323	0.00231565	0.00364573	0.000488428	0.00400295	4.41071e-05	0.0066365	1.09649e-05	1.26359e-05	0.412431	0.0166834
H19	3.24459e-05	0.00155482	0.00033613	0.000119008	0.00626691	8.05812e-06	0.0300342	4.52773e-06	0.483413	0.000126508	0.000144217	0.000767967	0.00044173	1.40925e-06	0.00361384	3.14613e-07	4.33608e-07	0.0166834	0.408664
																				0
LDM — diallyl_trisulfide_20_LIDI_matrix
	S1	S2	S3	C4	C5	C6	C7	C8	C9	H10	H11	H12	H13	H14	H15	H16	H17	H18	H19
S1	14.625	0.0762712	0.650971	0.526007	0.00515067	0.0425163	0.00119911	0.0208636	0.000854279	0.0288391	0.0287587	0.000599632	0.00603036	0.0056631	0.000328281	0.00109903	0.00124807	7.17099e-05	5.3783e-05		72.0246	21.9746
S2	0.0762712	14.6249	0.65088	0.0051413	0.526204	0.00119919	0.0425068	0.000854133	0.0208629	0.00603101	0.000599511	0.0287392	0.0288343	0.000328326	0.00566257	5.37666e-05	7.17066e-05	0.00124795	0.00109876
S3	0.650971	0.65088	14.6072	0.0381439	0.0381868	0.00919023	0.00919045	0.0050504	0.0050503	0.00316566	0.0104901	0.0104901	0.00316956	0.000332376	0.000332508	0.000479334	0.00023971	0.000239732	0.000479322
C4	0.526007	0.0051413	0.0381439	4.01334	0.000561206	0.515555	8.14103e-05	0.0373938	5.84195e-05	0.463724	0.462962	0.00015399	0.000200725	0.0196538	8.48076e-06	0.00634741	0.00632758	3.78055e-06	6.24972e-06
C5	0.00515067	0.526204	0.0381868	0.000561206	4.01336	8.153e-05	0.515788	5.85403e-05	0.037525	0.000201096	0.000154011	0.462938	0.463688	8.51773e-06	0.019706	6.25581e-06	3.78786e-06	0.00633382	0.00635093
C6	0.0425163	0.00119919	0.00919023	0.515555	8.153e-05	3.97796	2.41012e-05	0.921003	1.65486e-05	0.0181924	0.0187114	2.92166e-05	2.8231e-05	0.473437	3.60553e-06	0.0301825	0.0302171	1.08596e-06	1.65778e-06
C7	0.00119911	0.0425068	0.00919045	8.14103e-05	0.515788	2.41012e-05	3.97792	1.65498e-05	0.920964	2.82297e-05	2.92142e-05	0.0187075	0.01817	3.60545e-06	0.473438	1.65775e-06	1.086e-06	0.030196	0.0301813
C8	0.0208636	0.000854133	0.0050504	0.0373938	5.85403e-05	0.921003	1.65498e-05	4.08028	1.53101e-05	0.00638269	0.00898554	1.90082e-05	3.13053e-05	0.0293681	3.06839e-06	0.483465	0.480667	1.26616e-06	9.89359e-07
C9	0.000854279	0.0208629	0.0050503	5.84195e-05	0.037525	1.65486e-05	0.920964	1.53101e-05	4.08026	3.13112e-05	1.90067e-05	0.00898577	0.00638516	3.06882e-06	0.0293668	9.89492e-07	1.26638e-06	0.480671	0.483456
H10	0.0288391	0.00603101	0.00316566	0.463724	0.000201096	0.0181924	2.82297e-05	0.00638269	3.13112e-05	0.39392	0.0147282	8.86449e-05	5.95526e-05	0.00499464	7.10421e-06	0.000466552	0.00401727	2.18468e-06	1.1543e-06
H11	0.0287587	0.000599511	0.0104901	0.462962	0.000154011	0.0187114	2.92142e-05	0.00898554	1.90067e-05	0.0147282	0.389833	2.53853e-05	8.86334e-05	0.00164538	1.91185e-06	0.000800542	0.000522404	1.19231e-06	2.42316e-06
H12	0.000599632	0.0287392	0.0104901	0.00015399	0.462938	2.92166e-05	0.0187075	1.90082e-05	0.00898577	8.86449e-05	2.53853e-05	0.389832	0.0147282	1.91211e-06	0.00164538	2.42334e-06	1.19224e-06	0.00052239	0.000800561
H13	0.00603036	0.0288343	0.00316956	0.000200725	0.463688	2.8231e-05	0.01817	3.13053e-05	0.00638516	5.95526e-05	8.86334e-05	0.0147282	0.393919	7.1045e-06	0.00499468	1.15414e-06	2.18438e-06	0.0040175	0.000466589
H14	0.0056631	0.000328326	0.000332376	0.0196538	8.51773e-06	0.473437	3.60545e-06	0.0293681	3.06882e-06	0.00499464	0.00164538	1.91211e-06	7.1045e-06	0.409088	7.67025e-07	0.00363347	0.00675683	2.05047e-07	1.52523e-07
H15	0.000328281	0.00566257	0.000332508	8.48076e-06	0.019706	3.60553e-06	0.473438	3.06839e-06	0.0293668	7.10421e-06	1.91185e-06	0.00164538	0.00499468	7.67025e-07	0.409094	1.52509e-07	2.05066e-07	0.00675682	0.00363352
H16	0.00109903	5.37666e-05	0.000479334	0.00634741	6.25581e-06	0.0301825	1.65775e-06	0.483465	9.89492e-07	0.000466552	0.000800542	2.42334e-06	1.15414e-06	0.00363347	1.52509e-07	0.408913	0.0167493	9.00776e-08	1.26871e-07
H17	0.00124807	7.17066e-05	0.00023971	0.00632758	3.78786e-06	0.0302171	1.086e-06	0.480667	1.26638e-06	0.00401727	0.000522404	1.19224e-06	2.18438e-06	0.00675683	2.05066e-07	0.0167493	0.410449	1.10883e-07	9.00619e-08
H18	7.17099e-05	0.00124795	0.000239732	3.78055e-06	0.00633382	1.08596e-06	0.030196	1.26616e-06	0.480671	2.18468e-06	1.19231e-06	0.00052239	0.0040175	2.05047e-07	0.00675682	9.00776e-08	1.10883e-07	0.410447	0.0167491
H19	5.3783e-05	0.00109876	0.000479322	6.24972e-06	0.00635093	1.65778e-06	0.0301813	9.89359e-07	0.483456	1.1543e-06	2.42316e-06	0.000800561	0.000466589	1.52523e-07	0.00363352	1.26871e-07	9.00619e-08	0.0167491	0.408916
																				0
LDM — diallyl_trisulfide_21_LIDI_matrix
	S1	S2	S3	C4	C5	C6	C7	C8	C9	H10	H11	H12	H13	H14	H15	H16	H17	H18	H19
S1	14.6238	0.076563	0.650486	0.525798	0.00555222	0.0423837	0.00111153	0.020814	0.000976821	0.0287888	0.0287238	0.000636756	0.00821092	0.00563627	0.000159523	0.00109742	0.00124336	5.48564e-05	6.26562e-05		72.0258	21.9732
S2	0.076563	14.6252	0.649359	0.00535489	0.526253	0.00120338	0.0425222	0.000841639	0.0206941	0.00646938	0.000597708	0.0294547	0.0279596	0.000338469	0.00579748	5.34066e-05	7.51453e-05	0.00125641	0.00110318
S3	0.650486	0.649359	14.6098	0.0381356	0.0381755	0.00922798	0.00932947	0.00507974	0.00500135	0.00316889	0.0103227	0.00495908	0.00716419	0.000332612	0.00052045	0.000481286	0.000241318	0.000243001	0.00047565
C4	0.525798	0.00535489	0.0381356	4.01365	0.000581006	0.515627	7.69063e-05	0.0374749	6.16806e-05	0.463608	0.462975	0.000116311	0.000277231	0.0196653	1.37744e-05	0.00634961	0.00634793	3.61246e-06	4.78371e-06
C5	0.00555222	0.526253	0.0381755	0.000581006	4.01298	8.0391e-05	0.515596	5.92537e-05	0.0374757	0.000217859	0.000153154	0.465354	0.460902	8.96943e-06	0.0196691	6.14183e-06	4.00879e-06	0.00633364	0.0063494
C6	0.0423837	0.00120338	0.00922798	0.515627	8.0391e-05	3.97784	1.91205e-05	0.921029	1.44133e-05	0.0181502	0.0187038	2.23777e-05	3.77358e-05	0.473396	3.15109e-06	0.0301695	0.0302048	9.18352e-07	1.13973e-06
C7	0.00111153	0.0425222	0.00932947	7.69063e-05	0.515596	1.91205e-05	3.97804	1.09372e-05	0.921151	2.90481e-05	3.25783e-05	0.0182181	0.0188076	2.83465e-06	0.473425	1.21066e-06	1.04928e-06	0.0302527	0.0302116
C8	0.020814	0.000841639	0.00507974	0.0374749	5.92537e-05	0.921029	1.09372e-05	4.08019	9.32314e-06	0.00638771	0.00898478	1.83733e-05	3.92745e-05	0.0293708	4.27163e-06	0.483445	0.480691	5.61069e-07	6.27977e-07
C9	0.000976821	0.0206941	0.00500135	6.16806e-05	0.0374757	1.44133e-05	0.921151	9.32314e-06	4.08005	1.94602e-05	2.65835e-05	0.00638268	0.00892438	2.0478e-06	0.0293792	5.4619e-07	1.10985e-06	0.480745	0.483454
H10	0.0287888	0.00646938	0.00316889	0.463608	0.000217859	0.0181502	2.90481e-05	0.00638771	1.94602e-05	0.393717	0.0147171	0.000109562	5.69849e-05	0.00498994	9.51944e-06	0.000467058	0.00402267	2.00587e-06	8.69466e-07
H11	0.0287238	0.000597708	0.0103227	0.462975	0.000153154	0.0187038	3.25783e-05	0.00898478	2.65835e-05	0.0147171	0.389711	1.51108e-05	0.000119716	0.0016408	2.70241e-06	0.000800149	0.000521927	1.52187e-06	2.51343e-06
H12	0.000636756	0.0294547	0.00495908	0.000116311	0.465354	2.23777e-05	0.0182181	1.83733e-05	0.00638268	0.000109562	1.51108e-05	0.39728	0.0146671	2.82418e-06	0.00504516	1.85186e-06	1.21177e-06	0.00399925	0.000462751
H13	0.00821092	0.0279596	0.00716419	0.000277231	0.460902	3.77358e-05	0.0188076	3.92745e-05	0.00892438	5.69849e-05	0.000119716	0.0146671	0.386265	9.07284e-06	0.00165801	1.51716e-06	2.5998e-06	0.000523388	0.000796976
H14	0.00563627	0.000338469	0.000332612	0.0196653	8.96943e-06	0.473396	2.83465e-06	0.0293708	2.0478e-06	0.00498994	0.0016408	2.82418e-06	9.07284e-06	0.408999	2.24044e-07	0.00363172	0.00675656	1.14484e-07	1.35317e-07
H15	0.000159523	0.00579748	0.00052045	1.37744e-05	0.0196691	3.15109e-06	0.473425	4.27163e-06	0.0293792	9.51944e-06	2.70241e-06	0.00504516	0.00165801	2.24044e-07	0.409336	3.47562e-07	3.33253e-07	0.0067613	0.00364529
H16	0.00109742	5.34066e-05	0.000481286	0.00634961	6.14183e-06	0.0301695	1.21066e-06	0.483445	5.4619e-07	0.000467058	0.000800149	1.85186e-06	1.51716e-06	0.00363172	3.47562e-07	0.408754	0.0167474	4.99012e-08	7.92753e-08
H17	0.00124336	7.51453e-05	0.000241318	0.00634793	4.00879e-06	0.0302048	1.04928e-06	0.480691	1.10985e-06	0.00402267	0.000521927	1.21177e-06	2.5998e-06	0.00675656	3.33253e-07	0.0167474	0.4106	6.35443e-08	6.53276e-08
H18	5.48564e-05	0.00125641	0.000243001	3.61246e-06	0.00633364	9.18352e-07	0.0302527	5.61069e-07	0.480745	2.00587e-06	1.52187e-06	0.00399925	0.000523388	1.14484e-07	0.0067613	4.99012e-08	6.35443e-08	0.410613	0.01675
H19	6.26562e-05	0.00110318	0.00047565	4.78371e-06	0.0063494	1.13973e-06	0.0302116	6.27977e-07	0.483454	8.69466e-07	2.51343e-06	0.000462751	0.000796976	1.35317e-07	0.00364529	7.92753e-08	6.53276e-08	0.01675	0.408974
																				0
LDM — diallyl_trisulfide_22_LIDI_matrix
	S1	S2	S3	C4	C5	C6	C7	C8	C9	H10	H11	H12	H13	H14	H15	H16	H17	H18	H19
S1	14.6248	0.0763489	0.652321	0.526365	0.00621023	0.0406274	0.00093513	0.0233116	0.000653634	0.0284852	0.0269158	0.00918131	0.000808588	0.00621538	9.16039e-05	0.00131627	0.00154582	0.000542512	4.39901e-05		71.9609	22.0387
S2	0.0763489	14.6034	0.643294	0.00611279	0.538722	0.000994905	0.0328409	0.000779832	0.0192863	0.00847159	0.000801234	0.0289176	0.0267382	0.000305756	0.00832975	0.000891885	5.19924e-05	0.020565	0.00157976
S3	0.652321	0.643294	14.567	0.0374667	0.0376861	0.0149006	0.00919437	0.0137816	0.0092142	0.00433893	0.0086994	0.00635102	0.00870199	0.000505485	0.000694735	0.00243934	0.00037511	0.00430823	0.000270445
C4	0.526365	0.00611279	0.0374667	4.01479	0.000543209	0.517649	0.000166836	0.0369764	0.000160943	0.461168	0.464432	0.000254615	4.26427e-05	0.0199708	2.70049e-05	0.00631346	0.00628503	7.4923e-05	5.44789e-06
C5	0.00621023	0.538722	0.0376861	0.000543209	4.02417	0.000241343	0.51211	0.000172574	0.0347664	0.000246816	4.15929e-05	0.459398	0.462319	1.28069e-05	0.0205173	7.05597e-05	5.0792e-06	0.00447085	0.00649224
C6	0.0406274	0.000994905	0.0149006	0.517649	0.000241343	3.96673	3.28128e-05	0.916658	1.87267e-05	0.018037	0.019072	0.000152753	5.2119e-05	0.473469	5.0314e-06	0.0299769	0.0302151	6.89138e-06	8.35774e-07
C7	0.00093513	0.0328409	0.00919437	0.000166836	0.51211	3.28128e-05	3.98806	2.17019e-05	0.92809	0.00012683	3.22651e-05	0.0192691	0.0199199	2.55604e-06	0.473846	2.31221e-05	1.28798e-06	0.0293906	0.0313355
C8	0.0233116	0.000779832	0.0137816	0.0369764	0.000172574	0.916658	2.17019e-05	4.07625	2.0176e-05	0.00620398	0.00884445	0.000125085	3.31199e-05	0.029042	5.10603e-06	0.480113	0.48374	5.85439e-06	8.86976e-07
C9	0.000653634	0.0192863	0.0092142	0.000160943	0.0347664	1.87267e-05	0.92809	2.0176e-05	4.07593	3.86193e-05	3.79558e-05	0.00901316	0.0108652	1.32521e-06	0.0299589	7.31024e-06	9.79236e-07	0.472571	0.483761
H10	0.0284852	0.00847159	0.00433893	0.461168	0.000246816	0.018037	0.00012683	0.00620398	3.86193e-05	0.388686	0.0145798	5.3102e-05	1.64328e-05	0.00502506	2.5366e-05	0.00405283	0.00044403	3.37099e-05	2.27021e-06
H11	0.0269158	0.000801234	0.0086994	0.464432	4.15929e-05	0.019072	3.22651e-05	0.00884445	3.79558e-05	0.0145798	0.397472	1.30229e-05	4.98282e-06	0.00153299	3.1355e-06	0.000491306	0.000795458	2.53322e-05	1.35728e-06
H12	0.00918131	0.0289176	0.00635102	0.000254615	0.459398	0.000152753	0.0192691	0.000125085	0.00901316	5.3102e-05	1.30229e-05	0.38455	0.0149841	1.15047e-05	0.00162201	1.03236e-05	7.59611e-06	0.000483667	0.000696122
H13	0.000808588	0.0267382	0.00870199	4.26427e-05	0.462319	5.2119e-05	0.0199199	3.31199e-05	0.0108652	1.64328e-05	4.98282e-06	0.0149841	0.394064	2.80942e-06	0.000979252	2.03909e-06	7.9805e-07	0.000465377	0.000707013
H14	0.00621538	0.000305756	0.000505485	0.0199708	1.28069e-05	0.473469	2.55604e-06	0.029042	1.32521e-06	0.00502506	0.00153299	1.15047e-05	2.80942e-06	0.412164	5.55417e-07	0.006742	0.00363955	1.1217e-06	1.37001e-07
H15	9.16039e-05	0.00832975	0.000694735	2.70049e-05	0.0205173	5.0314e-06	0.473846	5.10603e-06	0.0299589	2.5366e-05	3.1355e-06	0.00162201	0.000979252	5.55417e-07	0.417252	7.46217e-06	1.49057e-07	0.0066615	0.00397352
H16	0.00131627	0.000891885	0.00243934	0.00631346	7.05597e-05	0.0299769	2.31221e-05	0.480113	7.31024e-06	0.00405283	0.000491306	1.03236e-05	2.03909e-06	0.006742	7.46217e-06	0.410399	0.0167477	2.84866e-06	2.50319e-07
H17	0.00154582	5.19924e-05	0.00037511	0.00628503	5.0792e-06	0.0302151	1.28798e-06	0.48374	9.79236e-07	0.00044403	0.000795458	7.59611e-06	7.9805e-07	0.00363955	1.49057e-07	0.0167477	0.410726	2.41946e-07	5.63882e-08
H18	0.000542512	0.020565	0.00430823	7.4923e-05	0.00447085	6.89138e-06	0.0293906	5.85439e-06	0.472571	3.37099e-05	2.53322e-05	0.000483667	0.000465377	1.1217e-06	0.0066615	2.84866e-06	2.41946e-07	0.392201	0.0159073
H19	4.39901e-05	0.00157976	0.000270445	5.44789e-06	0.00649224	8.35774e-07	0.0313355	8.86976e-07	0.483761	2.27021e-06	1.35728e-06	0.000696122	0.000707013	1.37001e-07	0.00397352	2.50319e-07	5.63882e-08	0.0159073	0.41231
																				0
LDM — diallyl_trisulfide_23_LIDI_matrix
	S1	S2	S3	C4	C5	C6	C7	C8	C9	H10	H11	H12	H13	H14	H15	H16	H17	H18	H19
S1	14.6238	0.0767683	0.649123	0.526164	0.00582818	0.0424835	0.00112051	0.0206632	0.000984866	0.0279255	0.0294903	0.000641509	0.00886964	0.00581218	0.000166861	0.00110218	0.00125472	5.59486e-05	6.38385e-05		72.0261	21.9723
S2	0.0767683	14.6238	0.649034	0.00583683	0.52613	0.00112042	0.0424726	0.000984889	0.0206613	0.00887165	0.000641737	0.0294621	0.02793	0.000166923	0.00581012	6.3823e-05	5.59506e-05	0.00125456	0.00110202
S3	0.649123	0.649034	14.6126	0.0381095	0.0380927	0.00933119	0.00933128	0.0050147	0.00501452	0.00709517	0.00490451	0.00490489	0.00709247	0.000518954	0.000518844	0.0004774	0.000243119	0.000243108	0.000477365
C4	0.526164	0.00583683	0.0381095	4.01336	0.000605124	0.515462	7.63177e-05	0.0374487	6.32734e-05	0.460748	0.465242	0.000121536	0.000300427	0.0196595	1.44631e-05	0.00634728	0.00632248	3.72986e-06	4.70941e-06
C5	0.00582818	0.52613	0.0380927	0.000605124	4.01334	7.63291e-05	0.515473	6.33059e-05	0.0374509	0.000300586	0.000121421	0.465335	0.460642	1.44661e-05	0.0196695	4.71259e-06	3.7302e-06	0.00632854	0.00634744
C6	0.0424835	0.00112042	0.00933119	0.515462	7.63291e-05	3.97798	1.61247e-05	0.921062	9.63121e-06	0.0187867	0.0181502	2.41336e-05	3.61235e-05	0.473423	4.31835e-06	0.0301936	0.0301918	8.76088e-07	9.22246e-07
C7	0.00112051	0.0424726	0.00933128	7.63177e-05	0.515473	1.61247e-05	3.97798	9.63418e-06	0.921057	3.6134e-05	2.41337e-05	0.0181447	0.0187897	4.31882e-06	0.473425	9.2196e-07	8.76051e-07	0.0301863	0.0301908
C8	0.0206632	0.000984889	0.0050147	0.0374487	6.33059e-05	0.921062	9.63418e-06	4.07992	2.61308e-06	0.00891593	0.00636745	2.6832e-05	2.09189e-05	0.0293813	5.23133e-06	0.483437	0.4807	4.67517e-07	3.46121e-07
C9	0.000984866	0.0206613	0.00501452	6.32734e-05	0.0374509	9.63121e-06	0.921057	2.61308e-06	4.07997	2.09169e-05	2.68323e-05	0.00637043	0.00891639	5.23206e-06	0.0293815	3.45953e-07	4.67341e-07	0.480704	0.483446
H10	0.0279255	0.00887165	0.00709517	0.460748	0.000300586	0.0187867	3.6134e-05	0.00891593	2.09169e-05	0.385908	0.0146409	0.00014753	4.95535e-05	0.00165666	1.10487e-05	0.00079561	0.000522846	2.45499e-06	1.04425e-06
H11	0.0294903	0.000641737	0.00490451	0.465242	0.000121421	0.0181502	2.41337e-05	0.00636745	2.68323e-05	0.0146409	0.396997	1.18882e-05	0.000147479	0.00504488	2.97303e-06	0.000462127	0.00399563	1.40208e-06	2.06429e-06
H12	0.000641509	0.0294621	0.00490489	0.000121536	0.465335	2.41336e-05	0.0181447	2.6832e-05	0.00637043	0.00014753	1.18882e-05	0.396997	0.0146407	2.97353e-06	0.00504492	2.06442e-06	1.4021e-06	0.00399601	0.000462186
H13	0.00886964	0.02793	0.00709247	0.000300427	0.460642	3.61235e-05	0.0187897	2.09189e-05	0.00891639	4.95535e-05	0.000147479	0.0146407	0.385907	1.10409e-05	0.00165605	1.04401e-06	2.4538e-06	0.000522751	0.000795596
H14	0.00581218	0.000166923	0.000518954	0.0196595	1.44661e-05	0.473423	4.31882e-06	0.0293813	5.23206e-06	0.00165666	0.00504488	2.97353e-06	1.10409e-05	0.409411	1.04282e-06	0.00364478	0.00676056	2.93748e-07	3.22828e-07
H15	0.000166861	0.00581012	0.000518844	1.44631e-05	0.0196695	4.31835e-06	0.473425	5.23133e-06	0.0293815	1.10487e-05	2.97303e-06	0.00504492	0.00165605	1.04282e-06	0.409406	3.22919e-07	2.9369e-07	0.00676049	0.00364472
H16	0.00110218	6.3823e-05	0.0004774	0.00634728	4.71259e-06	0.0301936	9.2196e-07	0.483437	3.45953e-07	0.00079561	0.000462127	2.06442e-06	1.04401e-06	0.00364478	3.22919e-07	0.408837	0.0167417	4.47673e-08	4.8231e-08
H17	0.00125472	5.59506e-05	0.000243119	0.00632248	3.7302e-06	0.0301918	8.76051e-07	0.4807	4.67341e-07	0.000522846	0.00399563	1.4021e-06	2.4538e-06	0.00676056	2.9369e-07	0.0167417	0.410503	4.40385e-08	4.47145e-08
H18	5.59486e-05	0.00125456	0.000243108	3.72986e-06	0.00632854	8.76088e-07	0.0301863	4.67517e-07	0.480704	2.45499e-06	1.40208e-06	0.00399601	0.000522751	2.93748e-07	0.00676049	4.47673e-08	4.40385e-08	0.410502	0.0167413
H19	6.38385e-05	0.00110202	0.000477365	4.70941e-06	0.00634744	9.22246e-07	0.0301908	3.46121e-07	0.483446	1.04425e-06	2.06429e-06	0.000462186	0.000795596	3.22828e-07	0.00364472	4.8231e-08	4.47145e-08	0.0167413	0.408837
																				0
LDM — diallyl_trisulfide_24_LIDI_matrix
	S1	S2	S3	C4	C5	C6	C7	C8	C9	H10	H11	H12	H13	H14	H15	H16	H17	H18	H19
S1	14.6227	0.0767472	0.650817	0.526011	0.00593464	0.0424555	0.000879951	0.0208218	0.00042363	0.0287829	0.0287861	0.000788787	0.00875474	0.00565092	0.000396533	0.00109849	0.00124066	4.13208e-05	4.47044e-05		72.0136	21.9876
S2	0.0767472	14.6246	0.649246	0.00538391	0.529654	0.00121224	0.0416307	0.0008488	0.0211131	0.000602697	0.00646289	0.0258738	0.0292591	0.000339182	0.00366752	5.38359e-05	7.4982e-05	0.000962643	0.00151664
S3	0.650817	0.649246	14.5994	0.03799	0.0373362	0.00917749	0.00874236	0.00506219	0.00173965	0.0103921	0.00311836	0.0085224	0.00606841	0.000329948	0.0116201	0.000478031	0.000240303	0.000441447	0.000203821
C4	0.526011	0.00538391	0.03799	4.01378	0.000539278	0.515708	0.000146976	0.0374905	6.66046e-05	0.462933	0.46356	4.40967e-05	0.000282028	0.0197105	0.00017668	0.00634827	0.00633406	9.29577e-06	7.33565e-06
C5	0.00593464	0.529654	0.0373362	0.000539278	4.01593	7.41606e-05	0.516042	5.58837e-05	0.0373108	0.000155929	0.00019016	0.463892	0.460418	8.69629e-06	0.0192192	5.49039e-06	3.81328e-06	0.00639074	0.0063376
C6	0.0424555	0.00121224	0.00917749	0.515708	7.41606e-05	3.97817	3.09143e-05	0.921043	9.55807e-06	0.0186799	0.0181582	1.19508e-05	4.03746e-05	0.473423	4.15083e-05	0.0301638	0.030203	2.04466e-06	1.3511e-06
C7	0.000879951	0.0416307	0.00874236	0.000146976	0.516042	3.09143e-05	3.9728	2.40618e-05	0.924101	2.09846e-05	0.0001097	0.0181422	0.0188246	3.48574e-06	0.469601	2.53025e-06	1.65681e-06	0.0307286	0.0304401
C8	0.0208218	0.0008488	0.00506219	0.0374905	5.58837e-05	0.921043	2.40618e-05	4.08	1.13526e-05	0.00898321	0.00638753	5.01527e-06	4.10997e-05	0.0293491	2.46681e-05	0.483385	0.480662	1.81783e-06	1.86234e-06
C9	0.00042363	0.0211131	0.00173965	6.66046e-05	0.0373108	9.55807e-06	0.924101	1.13526e-05	4.08244	7.49392e-06	6.74488e-05	0.00648214	0.00921255	2.39283e-06	0.0287698	7.17274e-07	1.08668e-06	0.481856	0.483833
H10	0.0287829	0.000602697	0.0103921	0.462933	0.000155929	0.0186799	2.09846e-05	0.00898321	7.49392e-06	0.389425	0.0147045	2.7386e-05	0.00011949	0.00163852	2.03587e-05	0.000799118	0.000520967	1.61448e-06	1.07093e-06
H11	0.0287861	0.00646289	0.00311836	0.46356	0.00019016	0.0181582	0.0001097	0.00638753	6.74488e-05	0.0147045	0.393615	1.22242e-05	6.09922e-05	0.00498846	7.35069e-06	0.000466847	0.0040189	2.4953e-06	5.61659e-06
H12	0.000788787	0.0258738	0.0085224	4.40967e-05	0.463892	1.19508e-05	0.0181422	5.01527e-06	0.00648214	2.7386e-05	1.22242e-05	0.398034	0.0144475	1.60062e-06	0.005092	6.45159e-07	4.96935e-07	0.00431868	0.00048889
H13	0.00875474	0.0292591	0.00606841	0.000282028	0.460418	4.03746e-05	0.0188246	4.10997e-05	0.00921255	0.00011949	6.09922e-05	0.0144475	0.384603	1.00097e-05	0.00107577	1.5563e-06	2.77061e-06	0.000446334	0.000757893
H14	0.00565092	0.000339182	0.000329948	0.0197105	8.69629e-06	0.473423	3.48574e-06	0.0293491	2.39283e-06	0.00163852	0.00498846	1.60062e-06	1.00097e-05	0.408896	8.19281e-07	0.00362997	0.00675294	1.16893e-07	1.8867e-07
H15	0.000396533	0.00366752	0.0116201	0.00017668	0.0192192	4.15083e-05	0.469601	2.46681e-05	0.0287698	2.03587e-05	7.35069e-06	0.005092	0.00107577	8.19281e-07	0.402062	3.41032e-06	1.26385e-06	0.00662144	0.00360952
H16	0.00109849	5.38359e-05	0.000478031	0.00634827	5.49039e-06	0.0301638	2.53025e-06	0.483385	7.17274e-07	0.000799118	0.000466847	6.45159e-07	1.5563e-06	0.00362997	3.41032e-06	0.408581	0.0167342	1.99564e-07	1.57396e-07
H17	0.00124066	7.4982e-05	0.000240303	0.00633406	3.81328e-06	0.030203	1.65681e-06	0.480662	1.08668e-06	0.000520967	0.0040189	4.96935e-07	2.77061e-06	0.00675294	1.26385e-06	0.0167342	0.410363	1.01599e-07	1.00601e-07
H18	4.13208e-05	0.000962643	0.000441447	9.29577e-06	0.00639074	2.04466e-06	0.0307286	1.81783e-06	0.481856	1.61448e-06	2.4953e-06	0.00431868	0.000446334	1.16893e-07	0.00662144	1.99564e-07	1.01599e-07	0.417153	0.017
H19	4.47044e-05	0.00151664	0.000203821	7.33565e-06	0.0063376	1.3511e-06	0.0304401	1.86234e-06	0.483833	1.07093e-06	5.61659e-06	0.00048889	0.000757893	1.8867e-07	0.00360952	1.57396e-07	1.00601e-07	0.017	0.410924
																				0
LDM — diallyl_trisulfide_25_LIDI_matrix
	S1	S2	S3	C4	C5	C6	C7	C8	C9	H10	H11	H12	H13	H14	H15	H16	H17	H18	H19
S1	14.6231	0.0770215	0.648968	0.529516	0.00587066	0.0416245	0.00112799	0.0210993	0.000991981	0.0292588	0.0258723	0.00895897	0.000652224	0.00367803	0.000166082	0.00151342	0.000962494	5.66867e-05	6.44999e-05		72.014	21.9861
S2	0.0770215	14.6225	0.648999	0.00623381	0.526051	0.000886535	0.0424851	0.000431111	0.0206839	0.00945982	0.000794853	0.0279164	0.0294327	0.000386791	0.00578645	4.5595e-05	4.11517e-05	0.00125559	0.00110211
S3	0.648968	0.648999	14.6024	0.0373057	0.0379552	0.00862375	0.00929022	0.00174191	0.00499711	0.00602081	0.00853378	0.00706031	0.00490793	0.011515	0.000515959	0.000203959	0.000439866	0.000242452	0.000473278
C4	0.529516	0.00623381	0.0373057	4.01632	0.000562512	0.515914	7.08148e-05	0.0372506	5.85161e-05	0.460169	0.463894	0.000261465	0.000125336	0.0192279	1.50782e-05	0.00633351	0.00638316	3.56225e-06	4.01616e-06
C5	0.00587066	0.526051	0.0379552	0.000562512	4.01347	0.000151028	0.515565	7.40308e-05	0.0375423	0.000306943	4.27693e-05	0.460626	0.465291	0.000173075	0.0196467	7.70358e-06	9.24632e-06	0.0063387	0.00634965
C6	0.0416245	0.000886535	0.00862375	0.515914	0.000151028	3.97285	3.17988e-05	0.924118	3.11634e-05	0.0187877	0.0181333	0.000153299	1.48349e-05	0.469606	2.98342e-06	0.0304296	0.0307332	1.66386e-06	2.66754e-06
C7	0.00112799	0.0424851	0.00929022	7.08148e-05	0.515565	3.17988e-05	3.97829	7.28693e-06	0.921119	3.7876e-05	9.52613e-06	0.0187712	0.0181714	4.18417e-05	0.473413	1.60275e-06	2.22129e-06	0.0302266	0.0301863
C8	0.0210993	0.000431111	0.00174191	0.0372506	7.40308e-05	0.924118	7.28693e-06	4.08242	1.274e-05	0.00919963	0.00649362	9.49095e-05	6.84544e-06	0.0287598	1.56132e-06	0.483814	0.481879	5.49457e-07	7.70108e-07
C9	0.000991981	0.0206839	0.00499711	5.85161e-05	0.0375423	3.11634e-05	0.921119	1.274e-05	4.07985	2.18675e-05	3.86685e-06	0.00890649	0.00637405	2.32307e-05	0.02935	2.58657e-06	2.15932e-06	0.480708	0.483385
H10	0.0292588	0.00945982	0.00602081	0.460169	0.000306943	0.0187877	3.7876e-05	0.00919963	2.18675e-05	0.384266	0.0144326	5.18979e-05	0.000152164	0.00107623	1.22631e-05	0.00075686	0.000446546	2.6298e-06	1.07716e-06
H11	0.0258723	0.000794853	0.00853378	0.463894	4.27693e-05	0.0181333	9.52613e-06	0.00649362	3.86685e-06	0.0144326	0.397898	1.35769e-05	1.97394e-05	0.00509125	3.63057e-06	0.000488585	0.00431988	5.5482e-07	4.52467e-07
H12	0.00895897	0.0279164	0.00706031	0.000261465	0.460626	0.000153299	0.0187712	9.49095e-05	0.00890649	5.18979e-05	1.35769e-05	0.385785	0.014628	1.64941e-05	0.00165625	7.97406e-06	3.63203e-06	0.000522366	0.000795064
H13	0.000652224	0.0294327	0.00490793	0.000125336	0.465291	1.48349e-05	0.0181714	6.84544e-06	0.00637405	0.000152164	1.97394e-05	0.014628	0.396765	9.78885e-06	0.00503925	9.87984e-07	1.02004e-06	0.00399463	0.000461952
H14	0.00367803	0.000386791	0.011515	0.0192279	0.000173075	0.469606	4.18417e-05	0.0287598	2.32307e-05	0.00107623	0.00509125	1.64941e-05	9.78885e-06	0.401957	1.00364e-06	0.00360713	0.00662085	1.23866e-06	3.31401e-06
H15	0.000166082	0.00578645	0.000515959	1.50782e-05	0.0196467	2.98342e-06	0.473413	1.56132e-06	0.02935	1.22631e-05	3.63057e-06	0.00165625	0.00503925	1.00364e-06	0.40909	1.48369e-07	1.55929e-07	0.0067567	0.00364128
H16	0.00151342	4.5595e-05	0.000203959	0.00633351	7.70358e-06	0.0304296	1.60275e-06	0.483814	2.58657e-06	0.00075686	0.000488585	7.97406e-06	9.87984e-07	0.00360713	1.48369e-07	0.410765	0.0169916	1.15187e-07	1.4744e-07
H17	0.000962494	4.11517e-05	0.000439866	0.00638316	9.24632e-06	0.0307332	2.22129e-06	0.481879	2.15932e-06	0.000446546	0.00431988	3.63203e-06	1.02004e-06	0.00662085	1.55929e-07	0.0169916	0.417091	1.05661e-07	1.88965e-07
H18	5.66867e-05	0.00125559	0.000242452	3.56225e-06	0.0063387	1.66386e-06	0.0302266	5.49457e-07	0.480708	2.6298e-06	5.5482e-07	0.000522366	0.00399463	1.23866e-06	0.0067567	1.15187e-07	1.05661e-07	0.410444	0.016734
H19	6.44999e-05	0.00110211	0.000473278	4.01616e-06	0.00634965	2.66754e-06	0.0301863	7.70108e-07	0.483385	1.07716e-06	4.52467e-07	0.000795064	0.000461952	3.31401e-06	0.00364128	1.4744e-07	1.88965e-07	0.016734	0.408649
																				0
LDM — diallyl_trisulfide_26_LIDI_matrix
	S1	S2	S3	C4	C5	C6	C7	C8	C9	H10	H11	H12	H13	H14	H15	H16	H17	H18	H19
S1	14.6221	0.0771879	0.649241	0.529546	0.00626218	0.0416555	0.000899807	0.021109	0.000428446	0.0258717	0.0292701	0.00953712	0.000799231	0.00369944	0.000389563	0.00151293	0.000962174	4.16917e-05	4.65722e-05		72.0009	22
S2	0.0771879	14.6218	0.648904	0.00626172	0.52925	0.000899439	0.0416167	0.000428886	0.0211065	0.000798567	0.00953831	0.02921	0.0258476	0.000387977	0.00367229	4.65891e-05	4.16536e-05	0.00096095	0.00151286
S3	0.649241	0.648904	14.5919	0.0371252	0.0370796	0.00871337	0.00872842	0.00174202	0.00174363	0.00849155	0.00598891	0.00597928	0.00849256	0.0116068	0.0116289	0.000204917	0.000440288	0.000440672	0.000204896
C4	0.529546	0.00626172	0.0371252	4.01647	0.000518032	0.516019	0.000155503	0.0372908	7.29767e-05	0.463913	0.460081	0.000268759	3.65181e-05	0.0192286	0.000175728	0.00633558	0.00638943	9.24779e-06	7.84887e-06
C5	0.00626218	0.52925	0.0370796	0.000518032	4.01614	0.000155159	0.51597	7.30074e-05	0.0372905	3.64601e-05	0.000268547	0.460088	0.463819	0.000175424	0.0191946	7.84191e-06	9.23645e-06	0.00638062	0.00633383
C6	0.0416555	0.000899439	0.00871337	0.516019	0.000155159	3.97296	2.1379e-05	0.924083	9.93204e-06	0.0181266	0.0187697	0.000156142	2.67766e-05	0.469528	1.62721e-05	0.0304231	0.0307416	1.60829e-06	1.38872e-06
C7	0.000899807	0.0416167	0.00872842	0.000155503	0.51597	2.1379e-05	3.97311	9.94747e-06	0.924237	2.6839e-05	0.000156188	0.0187759	0.0181611	1.6269e-05	0.469534	1.39089e-06	1.60993e-06	0.0307705	0.0304302
C8	0.021109	0.000428886	0.00174202	0.0372908	7.30074e-05	0.924083	9.94747e-06	4.08204	1.57808e-05	0.00646275	0.00919568	9.58508e-05	4.76382e-06	0.0287369	7.74189e-06	0.483752	0.481795	9.77487e-07	1.08467e-06
C9	0.000428446	0.0211065	0.00174363	7.29767e-05	0.0372905	9.93204e-06	0.924237	1.57808e-05	4.08237	4.76083e-06	9.58614e-05	0.00919722	0.00648163	7.73239e-06	0.0287518	1.08388e-06	9.77612e-07	0.481852	0.483809
H10	0.0258717	0.000798567	0.00849155	0.463913	3.64601e-05	0.0181266	2.6839e-05	0.00646275	4.76083e-06	0.397613	0.0144196	1.45024e-05	4.26737e-06	0.00508511	3.899e-05	0.000487659	0.00430913	1.90153e-06	1.26089e-06
H11	0.0292701	0.00953831	0.00598891	0.460081	0.000268547	0.0187697	0.000156188	0.00919568	9.58614e-05	0.0144196	0.384119	5.5188e-05	1.44911e-05	0.0010745	1.38996e-05	0.000756367	0.000446047	3.63227e-06	8.21752e-06
H12	0.00953712	0.02921	0.00597928	0.000268759	0.460088	0.000156142	0.0187759	9.58508e-05	0.00919722	1.45024e-05	5.5188e-05	0.38414	0.0144206	1.38669e-05	0.00107463	8.21525e-06	3.63161e-06	0.000446107	0.000756422
H13	0.000799231	0.0258476	0.00849256	3.65181e-05	0.463819	2.67766e-05	0.0181611	4.76382e-06	0.00648163	4.26737e-06	1.44911e-05	0.0144206	0.397606	3.8946e-05	0.00508476	1.25968e-06	1.89904e-06	0.00430896	0.000487644
H14	0.00369944	0.000387977	0.0116068	0.0192286	0.000175424	0.469528	1.6269e-05	0.0287369	7.73239e-06	0.00508511	0.0010745	1.38669e-05	3.8946e-05	0.40173	2.20792e-05	0.00360551	0.00661629	1.96542e-06	1.34289e-06
H15	0.000389563	0.00367229	0.0116289	0.000175728	0.0191946	1.62721e-05	0.469534	7.74189e-06	0.0287518	3.899e-05	1.38996e-05	0.00107463	0.00508476	2.20792e-05	0.401709	1.34481e-06	1.96638e-06	0.0066159	0.00360536
H16	0.00151293	4.65891e-05	0.000204917	0.00633558	7.84191e-06	0.0304231	1.39089e-06	0.483752	1.08388e-06	0.000487659	0.000756367	8.21525e-06	1.25968e-06	0.00360551	1.34481e-06	0.41062	0.0169831	9.84862e-08	7.39342e-08
H17	0.000962174	4.16536e-05	0.000440288	0.00638943	9.23645e-06	0.0307416	1.60993e-06	0.481795	9.77612e-07	0.00430913	0.000446047	3.63161e-06	1.89904e-06	0.00661629	1.96638e-06	0.0169831	0.416959	1.62798e-07	9.86182e-08
H18	4.16917e-05	0.00096095	0.000440672	9.24779e-06	0.00638062	1.60829e-06	0.0307705	9.77487e-07	0.481852	1.90153e-06	3.63227e-06	0.000446107	0.00430896	1.96542e-06	0.0066159	9.84862e-08	1.62798e-07	0.416956	0.0169834
H19	4.65722e-05	0.00151286	0.000204896	7.84887e-06	0.00633383	1.38872e-06	0.0304302	1.08467e-06	0.483809	1.26089e-06	8.21752e-06	0.000756422	0.000487644	1.34289e-06	0.00360536	7.39342e-08	9.86182e-08	0.0169834	0.410616
																				0
LDM — diallyl_trisulfide_27_LIDI_matrix
	S1	S2	S3	C4	C5	C6	C7	C8	C9	H10	H11	H12	H13	H14	H15	H16	H17	H18	H19
S1	14.6194	0.0785037	0.652803	0.525695	0.00362745	0.0422853	0.00110053	0.0207046	0.000649816	0.0291901	0.0279711	0.000904044	0.00172626	0.00568321	0.000206935	0.00109961	0.0012517	2.97747e-05	0.000608912		71.9773	22.0223
S2	0.0785037	14.6202	0.655284	0.00334396	0.527963	0.00110021	0.0388796	0.000800972	0.0216835	0.000710703	0.00103509	0.0270642	0.0289675	0.00012493	0.00722277	5.91794e-05	4.42947e-05	0.00156061	0.00124257
S3	0.652803	0.655284	14.5778	0.0373082	0.0369056	0.00914009	0.0171893	0.00496626	0.011542	0.00498177	0.00550513	0.00848133	0.00273531	0.000533838	0.000820966	0.000456122	0.000242174	0.000340301	0.00069496
C4	0.525695	0.00334396	0.0373082	4.00488	0.00175046	0.515408	0.000595222	0.0373244	0.00183483	0.464477	0.459019	0.000171842	0.0031348	0.0196769	9.53592e-05	0.00632891	0.00632225	9.75831e-05	0.00325524
C5	0.00362745	0.527963	0.0369056	0.00175046	4.01147	0.000196386	0.517212	0.000144078	0.0369166	0.000131379	0.003712	0.462722	0.462862	1.67464e-05	0.0197011	1.77668e-05	7.89564e-06	0.00626613	0.00606556
C6	0.0422853	0.00110021	0.00914009	0.515408	0.000196386	3.97909	5.73336e-05	0.921108	0.000163906	0.0181763	0.0189338	1.72497e-05	0.000224028	0.473439	1.12315e-05	0.030144	0.0302224	6.9075e-06	0.000255135
C7	0.00110053	0.0388796	0.0171893	0.000595222	0.517212	5.73336e-05	3.96378	4.41213e-05	0.916602	0.000193198	0.00103978	0.019246	0.0185365	4.54446e-06	0.472111	4.2951e-06	2.78605e-06	0.0300283	0.0303133
C8	0.0207046	0.000800972	0.00496626	0.0373244	0.000144078	0.921108	4.41213e-05	4.07901	0.000110219	0.00641267	0.00883604	1.60706e-05	0.000195486	0.0294104	5.57497e-06	0.483275	0.480598	8.11506e-06	0.000172672
C9	0.000649816	0.0216835	0.011542	0.00183483	0.0369166	0.000163906	0.916602	0.000110219	4.07749	0.000570804	0.00394948	0.00969097	0.00609026	1.34564e-05	0.0287781	1.03364e-05	5.87755e-06	0.483307	0.478661
H10	0.0291901	0.000710703	0.00498177	0.464477	0.000131379	0.0181763	0.000193198	0.00641267	0.000570804	0.396544	0.014963	3.1843e-05	0.000192956	0.00506666	1.53067e-05	0.000465539	0.0040271	1.42986e-05	0.000465742
H11	0.0279711	0.00103509	0.00550513	0.459019	0.003712	0.0189338	0.00103978	0.00883604	0.00394948	0.014963	0.394714	0.000298464	0.00605925	0.00165082	0.000235605	0.000776267	0.000519664	0.000297634	0.00566766
H12	0.000904044	0.0270642	0.00848133	0.000171842	0.462722	1.72497e-05	0.019246	1.60706e-05	0.00969097	3.1843e-05	0.000298464	0.393895	0.0147411	3.28439e-06	0.00132462	1.15916e-06	1.09398e-06	0.000767387	0.000492722
H13	0.00172626	0.0289675	0.00273531	0.0031348	0.462862	0.000224028	0.0185365	0.000195486	0.00609026	0.000192956	0.00605925	0.0147411	0.400955	2.33897e-05	0.00515101	2.18068e-05	1.09108e-05	0.000431598	0.00386841
H14	0.00568321	0.00012493	0.000533838	0.0196769	1.67464e-05	0.473439	4.54446e-06	0.0294104	1.34564e-05	0.00506666	0.00165082	3.28439e-06	2.33897e-05	0.409442	1.2601e-06	0.00363978	0.00675444	4.12532e-07	1.37803e-05
H15	0.000206935	0.00722277	0.000820966	9.53592e-05	0.0197011	1.12315e-05	0.472111	5.57497e-06	0.0287781	1.53067e-05	0.000235605	0.00132462	0.00515101	1.2601e-06	0.407781	9.9832e-07	4.08655e-07	0.00362841	0.00665684
H16	0.00109961	5.91794e-05	0.000456122	0.00632891	1.77668e-05	0.030144	4.2951e-06	0.483275	1.03364e-05	0.000465539	0.000776267	1.15916e-06	2.18068e-05	0.00363978	9.9832e-07	0.4081	0.0167058	6.68623e-07	1.55936e-05
H17	0.0012517	4.42947e-05	0.000242174	0.00632225	7.89564e-06	0.0302224	2.78605e-06	0.480598	5.87755e-06	0.0040271	0.000519664	1.09398e-06	1.09108e-05	0.00675444	4.08655e-07	0.0167058	0.410162	3.16401e-07	7.66003e-06
H18	2.97747e-05	0.00156061	0.000340301	9.75831e-05	0.00626613	6.9075e-06	0.0300283	8.11506e-06	0.483307	1.42986e-05	0.000297634	0.000767387	0.000431598	4.12532e-07	0.00362841	6.68623e-07	3.16401e-07	0.408465	0.0166744
H19	0.000608912	0.00124257	0.00069496	0.00325524	0.00606556	0.000255135	0.0303133	0.000172672	0.478661	0.000465742	0.00566766	0.000492722	0.00386841	1.37803e-05	0.00665684	1.55936e-05	7.66003e-06	0.0166744	0.414166
																				0
LDM — diallyl_trisulfide_28_LIDI_matrix
	S1	S2	S3	C4	C5	C6	C7	C8	C9	H10	H11	H12	H13	H14	H15	H16	H17	H18	H19
S1	14.6227	0.0752734	0.656352	0.528572	0.00498381	0.0416569	0.00120234	0.0207551	0.00087285	0.0292102	0.0260759	0.00563352	0.000601545	0.00335229	0.000317273	0.00145274	0.00100028	6.82658e-05	5.41265e-05		72.0053	21.9951
S2	0.0752734	14.616	0.649465	0.00329205	0.525822	0.00666274	0.0427022	0.00127085	0.0209315	0.000539244	0.00114364	0.0288811	0.0286397	0.0136043	0.0056973	0.000118148	0.000286611	0.00125625	0.00109903
S3	0.656352	0.649465	14.6	0.0384531	0.037984	0.00431973	0.00916094	0.00183088	0.00504292	0.0118773	0.00739864	0.00309417	0.0106943	0.00297622	0.000331825	0.000213231	0.000279126	0.000239118	0.000478102
C4	0.528572	0.00329205	0.0384531	4.01569	0.000540906	0.515875	9.05273e-05	0.0374346	7.01487e-05	0.461429	0.464351	0.000212931	0.000130906	0.019113	9.66968e-06	0.00635437	0.00648328	4.24433e-06	7.46035e-06
C5	0.00498381	0.525822	0.037984	0.000540906	4.01356	0.000191644	0.515625	5.74282e-05	0.0375585	0.000168223	0.000103059	0.463771	0.462791	0.000501851	0.0196545	3.90684e-06	1.15264e-05	0.00634164	0.00635269
C6	0.0416569	0.00666274	0.00431973	0.515875	0.000191644	3.97472	2.65011e-05	0.923666	2.80182e-05	0.0188824	0.0184371	7.29888e-05	7.01146e-05	0.467706	5.46403e-06	0.0303899	0.0307604	2.98601e-06	1.5409e-06
C7	0.00120234	0.0427022	0.00916094	9.05273e-05	0.515625	2.65011e-05	3.97816	1.11362e-05	0.920961	3.06111e-05	3.34203e-05	0.0181686	0.0186442	4.10709e-05	0.473418	8.68574e-07	1.98901e-06	0.0301722	0.0301817
C8	0.0207551	0.00127085	0.00183088	0.0374346	5.74282e-05	0.923666	1.11362e-05	4.08493	5.97395e-06	0.00936136	0.00665633	1.3843e-05	2.47029e-05	0.0283193	9.7683e-07	0.483918	0.481853	6.84669e-07	3.52078e-07
C9	0.00087285	0.0209315	0.00504292	7.01487e-05	0.0375585	2.80182e-05	0.920961	5.97395e-06	4.08022	1.88943e-05	2.6624e-05	0.00639552	0.00895437	4.69791e-05	0.0293357	6.74166e-07	2.01703e-06	0.48058	0.483431
H10	0.0292102	0.000539244	0.0118773	0.461429	0.000168223	0.0188824	3.06111e-05	0.00936136	1.88943e-05	0.385415	0.0142852	8.61876e-05	2.60443e-05	0.00112947	1.91443e-06	0.000762463	0.000450742	1.22732e-06	2.54279e-06
H11	0.0260759	0.00114364	0.00739864	0.464351	0.000103059	0.0184371	3.34203e-05	0.00665633	2.6624e-05	0.0142852	0.398696	2.56976e-05	2.28368e-05	0.00501984	5.10493e-06	0.000493986	0.00449849	1.44065e-06	2.27069e-06
H12	0.00563352	0.0288811	0.00309417	0.000212931	0.463771	7.29888e-05	0.0181686	1.3843e-05	0.00639552	8.61876e-05	2.56976e-05	0.393728	0.0147145	5.08403e-05	0.00498487	1.71115e-06	2.12239e-06	0.00400896	0.000465701
H13	0.000601545	0.0286397	0.0106943	0.000130906	0.462791	7.01146e-05	0.0186442	2.47029e-05	0.00895437	2.60443e-05	2.28368e-05	0.0147145	0.389384	0.000188752	0.00165218	2.42925e-06	4.38476e-06	0.000521908	0.000799226
H14	0.00335229	0.0136043	0.00297622	0.019113	0.000501851	0.467706	4.10709e-05	0.0283193	4.69791e-05	0.00112947	0.00501984	5.08403e-05	0.000188752	0.396231	6.64312e-06	0.00356124	0.00653984	3.56794e-06	1.61225e-06
H15	0.000317273	0.0056973	0.000331825	9.66968e-06	0.0196545	5.46403e-06	0.473418	9.7683e-07	0.0293357	1.91443e-06	5.10493e-06	0.00498487	0.00165218	6.64312e-06	0.4089	1.70823e-07	3.30289e-07	0.00674859	0.00362788
H16	0.00145274	0.000118148	0.000213231	0.00635437	3.90684e-06	0.0303899	8.68574e-07	0.483918	6.74166e-07	0.000762463	0.000493986	1.71115e-06	2.42925e-06	0.00356124	1.70823e-07	0.410899	0.0170102	1.22183e-07	5.95548e-08
H17	0.00100028	0.000286611	0.000279126	0.00648328	1.15264e-05	0.0307604	1.98901e-06	0.481853	2.01703e-06	0.000450742	0.00449849	2.12239e-06	4.38476e-06	0.00653984	3.30289e-07	0.0170102	0.417442	1.37022e-07	1.18168e-07
H18	6.82658e-05	0.00125625	0.000239118	4.24433e-06	0.00634164	2.98601e-06	0.0301722	6.84669e-07	0.48058	1.22732e-06	1.44065e-06	0.00400896	0.000521908	3.56794e-06	0.00674859	1.22183e-07	1.37022e-07	0.409855	0.0167273
H19	5.41265e-05	0.00109903	0.000478102	7.46035e-06	0.00635269	1.5409e-06	0.0301817	3.52078e-07	0.483431	2.54279e-06	2.27069e-06	0.000465701	0.000799226	1.61225e-06	0.00362788	5.95548e-08	1.18168e-07	0.0167273	0.40876
																				0
LDM — diallyl_trisulfide_29_LIDI_matrix
	S1	S2	S3	C4	C5	C6	C7	C8	C9	H10	H11	H12	H13	H14	H15	H16	H17	H18	H19
S1	14.6215	0.0755255	0.656332	0.52821	0.00536206	0.041502	0.00111214	0.0207605	0.00097995	0.0292069	0.0260636	0.000610173	0.00778087	0.00326422	0.000150175	0.00145259	0.000998456	5.31313e-05	6.19358e-05		72.0065	21.9929
S2	0.0755255	14.6163	0.647914	0.00331319	0.525978	0.00693093	0.0426797	0.00131466	0.0207412	0.000528869	0.00114378	0.0293423	0.0279926	0.0140027	0.00578191	0.00012252	0.000293573	0.00126313	0.00110378
S3	0.656332	0.647914	14.6029	0.0384033	0.0379527	0.00430301	0.0093171	0.0018348	0.0049984	0.0116707	0.00743823	0.00496924	0.00707577	0.00294538	0.000521249	0.000211952	0.000278012	0.000242704	0.000473841
C4	0.52821	0.00331319	0.0384033	4.01565	0.000555414	0.515864	8.1606e-05	0.0374158	7.4086e-05	0.461474	0.464268	8.67821e-05	0.000303955	0.0191122	1.3354e-05	0.00635537	0.00648373	3.75467e-06	5.7091e-06
C5	0.00536206	0.525978	0.0379527	0.000555414	4.013	0.000203293	0.515361	5.97886e-05	0.0375058	0.000167012	0.000102759	0.465291	0.461112	0.000522684	0.0196443	4.06833e-06	1.19313e-05	0.00633512	0.00635228
C6	0.041502	0.00693093	0.00430301	0.515864	0.000203293	3.97469	3.03997e-05	0.923634	2.03602e-05	0.0188812	0.0184184	8.27266e-05	7.28096e-05	0.467629	1.33773e-05	0.0303957	0.0307357	2.12906e-06	1.20024e-06
C7	0.00111214	0.0426797	0.0093171	8.1606e-05	0.515361	3.03997e-05	3.97819	1.23017e-05	0.921083	3.35219e-05	2.15716e-05	0.0181244	0.0187941	4.42862e-05	0.473305	1.13422e-06	1.67182e-06	0.0301997	0.0301883
C8	0.0207605	0.00131466	0.0018348	0.0374158	5.97886e-05	0.923634	1.23017e-05	4.0848	5.09331e-06	0.00934262	0.00665555	2.00451e-05	1.34344e-05	0.0283086	4.46833e-06	0.483934	0.481799	4.65025e-07	3.98346e-07
C9	0.00097995	0.0207412	0.0049984	7.4086e-05	0.0375058	2.03602e-05	0.921083	5.09331e-06	4.08001	2.62088e-05	1.7929e-05	0.00637123	0.00891513	1.76077e-05	0.0293218	3.52972e-07	9.77942e-07	0.480735	0.483435
H10	0.0292069	0.000528869	0.0116707	0.461474	0.000167012	0.0188812	3.35219e-05	0.00934262	2.62088e-05	0.385348	0.0142839	1.57634e-05	0.000113658	0.00113613	3.60785e-06	0.000763568	0.000450988	1.55004e-06	2.67506e-06
H11	0.0260636	0.00114378	0.00743823	0.464268	0.000102759	0.0184184	2.15716e-05	0.00665555	1.7929e-05	0.0142839	0.398522	2.16269e-05	3.77478e-05	0.00501177	2.30384e-06	0.000493886	0.00449864	9.68972e-07	1.52511e-06
H12	0.000610173	0.0293423	0.00496924	8.67821e-05	0.465291	8.27266e-05	0.0181244	2.00451e-05	0.00637123	1.57634e-05	2.16269e-05	0.396983	0.014676	0.000217144	0.0050285	1.96107e-06	4.91824e-06	0.00398826	0.000461509
H13	0.00778087	0.0279926	0.00707577	0.000303955	0.461112	7.28096e-05	0.0187941	1.34344e-05	0.00891513	0.000113658	3.77478e-05	0.014676	0.386449	3.06476e-05	0.00166163	1.64559e-06	1.8398e-06	0.000524059	0.000796338
H14	0.00326422	0.0140027	0.00294538	0.0191122	0.000522684	0.467629	4.42862e-05	0.0283086	1.76077e-05	0.00113613	0.00501177	0.000217144	3.06476e-05	0.396151	2.37169e-05	0.00356033	0.00653482	3.33665e-06	9.21285e-07
H15	0.000150175	0.00578191	0.000521249	1.3354e-05	0.0196443	1.33773e-05	0.473305	4.46833e-06	0.0293218	3.60785e-06	2.30384e-06	0.0050285	0.00166163	2.37169e-05	0.408479	5.64526e-07	2.94113e-07	0.00675185	0.00363759
H16	0.00145259	0.00012252	0.000211952	0.00635537	4.06833e-06	0.0303957	1.13422e-06	0.483934	3.52972e-07	0.000763568	0.000493886	1.96107e-06	1.64559e-06	0.00356033	5.64526e-07	0.41104	0.0170069	5.3179e-08	4.00285e-08
H17	0.000998456	0.000293573	0.000278012	0.00648373	1.19313e-05	0.0307357	1.67182e-06	0.481799	9.77942e-07	0.000450988	0.00449864	4.91824e-06	1.8398e-06	0.00653482	2.94113e-07	0.0170069	0.417231	7.62918e-08	7.33739e-08
H18	5.31313e-05	0.00126313	0.000242704	3.75467e-06	0.00633512	2.12906e-06	0.0301997	4.65025e-07	0.480735	1.55004e-06	9.68972e-07	0.00398826	0.000524059	3.33665e-06	0.00675185	5.3179e-08	7.62918e-08	0.410533	0.0167425
H19	6.19358e-05	0.00110378	0.000473841	5.7091e-06	0.00635228	1.20024e-06	0.0301883	3.98346e-07	0.483435	2.67506e-06	1.52511e-06	0.000461509	0.000796338	9.21285e-07	0.00363759	4.00285e-08	7.33739e-08	0.0167425	0.408775
																				0
LDM — diallyl_trisulfide_30_LIDI_matrix
	S1	S2	S3	C4	C5	C6	C7	C8	C9	H10	H11	H12	H13	H14	H15	H16	H17	H18	H19
S1	14.6205	0.0758622	0.656242	0.528105	0.00567252	0.0414854	0.000846248	0.0207827	0.000400164	0.0260687	0.029188	0.00813584	0.000787301	0.00328329	0.0004082	0.0014517	0.000998724	4.06163e-05	4.20573e-05		71.9939	22.0051
S2	0.0758622	14.6162	0.647901	0.00333177	0.529386	0.00683326	0.0415151	0.00130217	0.0210618	0.00115575	0.000530898	0.0293618	0.025951	0.013855	0.00365407	0.000121773	0.000291115	0.00095929	0.001511
S3	0.656242	0.647901	14.5918	0.0382717	0.0370794	0.00426631	0.00879049	0.00183257	0.00172256	0.00739533	0.0117222	0.00598942	0.00849005	0.00291782	0.0117387	0.000210948	0.000275695	0.000441954	0.000202524
C4	0.528105	0.00333177	0.0382717	4.01578	0.000524961	0.515917	0.000120779	0.0374729	5.09053e-05	0.46423	0.461412	0.000307927	5.19926e-05	0.0191429	0.000179409	0.00635328	0.00648837	9.16408e-06	6.23116e-06
C5	0.00567252	0.529386	0.0370794	0.000524961	4.01573	0.000179979	0.515837	5.57279e-05	0.0372344	9.79718e-05	0.00017	0.46061	0.463741	0.000452211	0.019187	3.41946e-06	1.01946e-05	0.00638217	0.00633205
C6	0.0414854	0.00683326	0.00426631	0.515917	0.000179979	3.97473	8.09158e-05	0.92362	5.41107e-05	0.0183748	0.0188531	8.02183e-05	1.53014e-05	0.467794	1.37063e-05	0.0303887	0.0307095	2.48021e-06	4.32699e-06
C7	0.000846248	0.0415151	0.00879049	0.000120779	0.515837	8.09158e-05	3.97282	2.04058e-05	0.924073	3.00478e-05	2.10726e-05	0.0188214	0.0181051	0.000212771	0.469502	2.47886e-06	5.35845e-06	0.030722	0.0304237
C8	0.0207827	0.00130217	0.00183257	0.0374729	5.57279e-05	0.92362	2.04058e-05	4.08462	1.4173e-05	0.00665958	0.00933657	1.43547e-05	8.04789e-06	0.0283369	9.97431e-06	0.483898	0.481792	1.51217e-06	1.49265e-06
C9	0.000400164	0.0210618	0.00172256	5.09053e-05	0.0372344	5.41107e-05	0.924073	1.4173e-05	4.08228	1.44092e-05	7.77453e-06	0.00921646	0.00648669	0.000144066	0.0287515	1.58729e-06	4.43246e-06	0.481829	0.483798
H10	0.0260687	0.00115575	0.00739533	0.46423	9.79718e-05	0.0183748	3.00478e-05	0.00665958	1.44092e-05	0.398296	0.0142695	4.09186e-05	1.39611e-05	0.0050134	3.28711e-05	0.000493433	0.00449424	2.38947e-06	2.2766e-06
H11	0.029188	0.000530898	0.0117222	0.461412	0.00017	0.0188531	2.10726e-05	0.00933657	7.77453e-06	0.0142695	0.385078	0.000112673	2.89004e-05	0.00113671	2.22138e-05	0.000762614	0.00045046	1.82418e-06	1.32148e-06
H12	0.00813584	0.0293618	0.00598942	0.000307927	0.46061	8.02183e-05	0.0188214	1.43547e-05	0.00921646	4.09186e-05	0.000112673	0.384755	0.0144387	3.25719e-05	0.00107007	1.79711e-06	1.90373e-06	0.000446298	0.000758196
H13	0.000787301	0.025951	0.00849005	5.19926e-05	0.463741	1.53014e-05	0.0181051	8.04789e-06	0.00648669	1.39611e-05	2.89004e-05	0.0144387	0.397377	1.42078e-05	0.0050841	5.08745e-07	8.59651e-07	0.00431623	0.000488747
H14	0.00328329	0.013855	0.00291782	0.0191429	0.000452211	0.467794	0.000212771	0.0283369	0.000144066	0.0050134	0.00113671	3.25719e-05	1.42078e-05	0.396497	1.11122e-05	0.00356068	0.00653705	5.05965e-06	1.19808e-05
H15	0.0004082	0.00365407	0.0117387	0.000179409	0.019187	1.37063e-05	0.469502	9.97431e-06	0.0287515	3.28711e-05	2.22138e-05	0.00107007	0.0050841	1.11122e-05	0.401812	1.87741e-06	1.81568e-06	0.00661428	0.00360574
H16	0.0014517	0.000121773	0.000210948	0.00635328	3.41946e-06	0.0303887	2.47886e-06	0.483898	1.58729e-06	0.000493433	0.000762614	1.79711e-06	5.08745e-07	0.00356068	1.87741e-06	0.410737	0.0169919	1.38752e-07	1.06056e-07
H17	0.000998724	0.000291115	0.000275695	0.00648837	1.01946e-05	0.0307095	5.35845e-06	0.481792	4.43246e-06	0.00449424	0.00045046	1.90373e-06	8.59651e-07	0.00653705	1.81568e-06	0.0169919	0.417098	2.32606e-07	3.30457e-07
H18	4.06163e-05	0.00095929	0.000441954	9.16408e-06	0.00638217	2.48021e-06	0.030722	1.51217e-06	0.481829	2.38947e-06	1.82418e-06	0.000446298	0.00431623	5.05965e-06	0.00661428	1.38752e-07	2.32606e-07	0.41697	0.0169895
H19	4.20573e-05	0.001511	0.000202524	6.23116e-06	0.00633205	4.32699e-06	0.0304237	1.49265e-06	0.483798	2.2766e-06	1.32148e-06	0.000758196	0.000488747	1.19808e-05	0.00360574	1.06056e-07	3.30457e-07	0.0169895	0.410761
																				0
LDM — diallyl_trisulfide_31_LIDI_matrix
	S1	S2	S3	C4	C5	C6	C7	C8	C9	H10	H11	H12	H13	H14	H15	H16	H17	H18	H19
S1	14.6149	0.0744818	0.65501	0.528164	0.00326797	0.0417939	0.00623484	0.0207285	0.00121144	0.0261039	0.029065	0.000553323	0.00113691	0.00349462	0.0132187	0.00144458	0.00100498	0.000282682	0.000114047		71.986	22.013
S2	0.0744818	14.6148	0.654868	0.00327714	0.52797	0.00622363	0.0417871	0.00121126	0.0207263	0.0011367	0.000552704	0.029032	0.0260969	0.0132201	0.00348407	0.000114034	0.000282709	0.00100437	0.00144451
S3	0.65501	0.654868	14.5917	0.0383196	0.0383194	0.00417496	0.00418601	0.0018465	0.00184772	0.00729426	0.0123468	0.0123478	0.00729437	0.00268698	0.00269295	0.000216936	0.000273437	0.00027367	0.000216989
C4	0.528164	0.00327714	0.0383196	4.01604	0.000518104	0.51588	0.000191852	0.0375091	5.63305e-05	0.464294	0.461092	0.000145956	0.000119971	0.0191451	0.000531137	0.00635256	0.00649513	1.24069e-05	3.73855e-06
C5	0.00326797	0.52797	0.0383194	0.000518104	4.01582	0.000191355	0.515838	5.62855e-05	0.0374985	0.000119918	0.00014594	0.461074	0.464233	0.000530821	0.0191378	3.73281e-06	1.24008e-05	0.00649531	0.00635214
C6	0.0417939	0.00622363	0.00417496	0.51588	0.000191355	3.97479	0.000134985	0.923654	3.00433e-05	0.0184315	0.0188109	7.24379e-05	2.0472e-05	0.467849	0.000133032	0.0303585	0.0307628	3.06706e-06	2.65572e-06
C7	0.00623484	0.0417871	0.00418601	0.000191852	0.515838	0.000134985	3.97475	3.0033e-05	0.923619	2.04868e-05	7.25423e-05	0.0188084	0.018411	0.000133246	0.467854	2.65666e-06	3.06978e-06	0.0307442	0.0303541
C8	0.0207285	0.00121126	0.0018465	0.0375091	5.62855e-05	0.923654	3.0033e-05	4.08441	6.53095e-06	0.00665696	0.00937455	2.78618e-05	6.81613e-06	0.0283046	3.92845e-05	0.483798	0.481837	1.09474e-06	1.03864e-06
C9	0.00121144	0.0207263	0.00184772	5.63305e-05	0.0374985	3.00433e-05	0.923619	6.53095e-06	4.08447	6.81568e-06	2.78578e-05	0.00937457	0.00665663	3.93288e-05	0.0283059	1.03819e-06	1.09498e-06	0.481838	0.483819
H10	0.0261039	0.0011367	0.00729426	0.464294	0.000119918	0.0184315	2.04868e-05	0.00665696	6.81568e-06	0.398269	0.014238	2.32141e-05	4.69386e-05	0.00502702	2.84251e-05	0.000493151	0.00450096	2.09708e-06	4.24028e-07
H11	0.029065	0.000552704	0.0123468	0.461092	0.00014594	0.0188109	7.25423e-05	0.00937455	2.78578e-05	0.014238	0.384583	2.72608e-05	2.32123e-05	0.00112061	0.000185361	0.000759226	0.000449872	4.33379e-06	2.59658e-06
H12	0.000553323	0.029032	0.0123478	0.000145956	0.461074	7.24379e-05	0.0188084	2.78618e-05	0.00937457	2.32141e-05	2.72608e-05	0.384579	0.014238	0.000185376	0.00112089	2.59657e-06	4.33394e-06	0.000449916	0.00075922
H13	0.00113691	0.0260969	0.00729437	0.000119971	0.464233	2.0472e-05	0.018411	6.81613e-06	0.00665663	4.69386e-05	2.32123e-05	0.014238	0.398262	2.84234e-05	0.00502698	4.24024e-07	2.09707e-06	0.00450095	0.00049316
H14	0.00349462	0.0132201	0.00268698	0.0191451	0.000530821	0.467849	0.000133246	0.0283046	3.93288e-05	0.00502702	0.00112061	0.000185376	2.84234e-05	0.396468	2.39665e-05	0.00355889	0.00654218	1.98721e-06	2.27721e-06
H15	0.0132187	0.00348407	0.00269295	0.000531137	0.0191378	0.000133032	0.467854	3.92845e-05	0.0283059	2.84251e-05	0.000185361	0.00112089	0.00502698	2.39665e-05	0.396467	2.2755e-06	1.98574e-06	0.00654209	0.00355888
H16	0.00144458	0.000114034	0.000216936	0.00635256	3.73281e-06	0.0303585	2.65666e-06	0.483798	1.03819e-06	0.000493151	0.000759226	2.59657e-06	4.24024e-07	0.00355889	2.2755e-06	0.410411	0.0169912	1.05809e-07	1.29668e-07
H17	0.00100498	0.000282709	0.000273437	0.00649513	1.24008e-05	0.0307628	3.06978e-06	0.481837	1.09498e-06	0.00450096	0.000449872	4.33394e-06	2.09707e-06	0.00654218	1.98574e-06	0.0169912	0.417391	1.56552e-07	1.05745e-07
H18	0.000282682	0.00100437	0.00027367	1.24069e-05	0.00649531	3.06706e-06	0.0307442	1.09474e-06	0.481838	2.09708e-06	4.33379e-06	0.000449916	0.00450095	1.98721e-06	0.00654209	1.05809e-07	1.56552e-07	0.417386	0.0169914
H19	0.000114047	0.00144451	0.000216989	3.73855e-06	0.00635214	2.65572e-06	0.0303541	1.03864e-06	0.483819	4.24028e-07	2.59658e-06	0.00075922	0.00049316	2.27721e-06	0.00355888	1.29668e-07	1.05745e-07	0.0169914	0.410415
LDM — diallyl_trisulfide_32_LIDI_matrix
	S1	S2	S3	C4	C5	C6	C7	C8	C9	H10	H11	H12	H13	H14	H15	H16	H17	H18	H19
S1	14.6142	0.078434	0.654069	0.526241	0.00325207	0.0430206	0.00128143	0.0209347	0.000996335	0.0291932	0.0280566	0.00109425	0.000829266	0.00617016	0.000232724	0.00109798	0.00125335	5.47704e-05	6.57658e-05		72.0028	21.9949
S2	0.078434	14.6142	0.654067	0.00325094	0.526128	0.00128127	0.0430157	0.000996372	0.0209362	0.00109178	0.000828603	0.0291876	0.0280621	0.000232565	0.00617022	6.57682e-05	5.47552e-05	0.00125337	0.00109801
S3	0.654069	0.654067	14.5986	0.0379159	0.0379199	0.00846498	0.0084643	0.00474207	0.00474252	0.00235147	0.0122128	0.00234971	0.0122137	0.000306173	0.000306151	0.000471843	0.000223886	0.000223905	0.000471883
C4	0.526241	0.00325094	0.0379159	4.01051	0.00209105	0.515575	0.000261483	0.0375032	8.85184e-05	0.463922	0.461988	0.00324987	0.000535206	0.0196018	5.68861e-05	0.00634424	0.0063498	1.11206e-05	1.16971e-05
C5	0.00325207	0.526128	0.0379199	0.00209105	4.01042	0.000262138	0.51556	8.84405e-05	0.0375394	0.00325623	0.000534625	0.463892	0.461997	5.70822e-05	0.019556	1.17003e-05	1.11429e-05	0.00635117	0.0063454
C6	0.0430206	0.00128127	0.00846498	0.515575	0.000262138	3.97781	4.13669e-05	0.92067	1.20775e-05	0.018414	0.0185941	0.000374543	5.33351e-05	0.472907	1.15469e-05	0.0300884	0.0302894	1.85542e-06	9.23682e-07
C7	0.00128143	0.0430157	0.0084643	0.000261483	0.51556	4.13669e-05	3.97781	1.20619e-05	0.920687	0.000375141	5.32375e-05	0.0184164	0.0185977	1.15499e-05	0.47292	9.23078e-07	1.85555e-06	0.0302916	0.0300867
C8	0.0209347	0.000996372	0.00474207	0.0375032	8.84405e-05	0.92067	1.20619e-05	4.0805	7.62011e-06	0.00654771	0.00915922	7.16246e-05	4.73646e-05	0.0290964	5.20441e-06	0.483255	0.480881	1.69311e-06	6.17444e-07
C9	0.000996335	0.0209362	0.00474252	8.85184e-05	0.0375394	1.20775e-05	0.920687	7.62011e-06	4.08066	7.17457e-05	4.73504e-05	0.00655458	0.00915976	5.2056e-06	0.0291111	6.17583e-07	1.69344e-06	0.480898	0.483296
H10	0.0291932	0.00109178	0.00235147	0.463922	0.00325623	0.018414	0.000375141	0.00654771	7.17457e-05	0.403055	0.0150148	0.00523272	0.000192236	0.00499002	0.000139065	0.000475746	0.0041794	2.51111e-05	5.53611e-06
H11	0.0280566	0.000828603	0.0122128	0.461988	0.000534625	0.0185941	5.32375e-05	0.00915922	4.73504e-05	0.0150148	0.389313	0.000191421	0.000509775	0.0016238	3.54608e-06	0.000790374	0.000532025	2.13853e-06	3.0858e-06
H12	0.00109425	0.0291876	0.00234971	0.00324987	0.463892	0.000374543	0.0184164	7.16246e-05	0.00655458	0.00523272	0.000191421	0.403051	0.0150149	0.000139001	0.00499005	5.52332e-06	2.5114e-05	0.00417925	0.000475699
H13	0.000829266	0.0280621	0.0122137	0.000535206	0.461997	5.33351e-05	0.0185977	4.73646e-05	0.00915976	0.000192236	0.000509775	0.0150149	0.389312	3.55939e-06	0.00162378	3.08793e-06	2.14085e-06	0.000532051	0.000790383
H14	0.00617016	0.000232565	0.000306173	0.0196018	5.70822e-05	0.472907	1.15499e-05	0.0290964	5.2056e-06	0.00499002	0.0016238	0.000139001	3.55939e-06	0.407054	3.14138e-06	0.00360877	0.00674906	5.65452e-07	3.7354e-07
H15	0.000232724	0.00617022	0.000306151	5.68861e-05	0.019556	1.15469e-05	0.47292	5.20441e-06	0.0291111	0.000139065	3.54608e-06	0.00499005	0.00162378	3.14138e-06	0.40706	3.73408e-07	5.65942e-07	0.00674905	0.00360883
H16	0.00109798	6.57682e-05	0.000471843	0.00634424	1.17003e-05	0.0300884	9.23078e-07	0.483255	6.17583e-07	0.000475746	0.000790374	5.52332e-06	3.08793e-06	0.00360877	3.73408e-07	0.407754	0.0167456	9.83913e-08	5.21254e-08
H17	0.00125335	5.47552e-05	0.000223886	0.0063498	1.11429e-05	0.0302894	1.85555e-06	0.480881	1.69344e-06	0.0041794	0.000532025	2.5114e-05	2.14085e-06	0.00674906	5.65942e-07	0.0167456	0.411887	3.34795e-07	9.83076e-08
H18	5.47704e-05	0.00125337	0.000223905	1.11206e-05	0.00635117	1.85542e-06	0.0302916	1.69311e-06	0.480898	2.51111e-05	2.13853e-06	0.00417925	0.000532051	5.65452e-07	0.00674905	9.83913e-08	3.34795e-07	0.411884	0.0167454
H19	6.57658e-05	0.00109801	0.000471883	1.16971e-05	0.0063454	9.23682e-07	0.0300867	6.17444e-07	0.483296	5.53611e-06	3.0858e-06	0.000475699	0.000790383	3.7354e-07	0.00360883	5.21254e-08	9.83076e-08	0.0167454	0.40775
																				0
LDM — diallyl_trisulfide_33_LIDI_matrix
	S1	S2	S3	C4	C5	C6	C7	C8	C9	H10	H11	H12	H13	H14	H15	H16	H17	H18	H19
S1	14.6281	0.0760102	0.650558	0.5266	0.00601349	0.0406619	0.000977231	0.0232962	0.000741074	0.0285144	0.0269407	0.00852693	0.000608397	0.00622183	0.000169365	0.00132205	0.00154548	9.51623e-05	0.000573142		71.9739	22.0261
S2	0.0760102	14.6073	0.648094	0.00596082	0.533168	0.000978326	0.0306751	0.000776592	0.0215859	0.00819487	0.000828147	0.0288589	0.0287976	0.000294719	0.0070892	0.000857855	5.09536e-05	0.00145117	0.0201831
S3	0.650558	0.648094	14.5754	0.0374655	0.0390912	0.0149093	0.00851621	0.0137916	0.00246387	0.00439055	0.00872182	0.00454508	0.00911316	0.000505426	0.00160476	0.00246063	0.000375126	0.000279295	0.00190746
C4	0.5266	0.00596082	0.0374655	4.01451	0.000569226	0.517638	6.88328e-05	0.0369475	3.75161e-05	0.46116	0.464266	0.000238211	0.000151646	0.0199934	2.50395e-05	0.00630712	0.00628161	4.30699e-06	2.49113e-05
C5	0.00601349	0.533168	0.0390912	0.000569226	4.02243	0.000240789	0.515086	0.000170038	0.0354379	0.000258499	4.77821e-05	0.460649	0.460972	1.21501e-05	0.0203352	7.49338e-05	5.03086e-06	0.00654772	0.00445915
C6	0.0406619	0.000978326	0.0149093	0.517638	0.000240789	3.96711	5.41965e-05	0.91674	1.05289e-05	0.0180473	0.0190544	0.000138731	3.24869e-05	0.473493	1.4682e-05	0.0299934	0.0302115	2.22544e-06	5.8588e-06
C7	0.000977231	0.0306751	0.00851621	6.88328e-05	0.515086	5.41965e-05	3.98404	3.40965e-05	0.927905	3.04815e-05	1.27685e-05	0.0197945	0.0197839	2.8542e-06	0.473274	5.15053e-06	7.7181e-07	0.0310117	0.0297501
C8	0.0232962	0.000776592	0.0137916	0.0369475	0.000170038	0.91674	3.40965e-05	4.07628	7.45798e-06	0.00619604	0.00884521	0.000114388	2.0675e-05	0.0290491	9.24464e-06	0.4801	0.483714	1.36649e-06	2.59212e-06
C9	0.000741074	0.0215859	0.00246387	3.75161e-05	0.0354379	1.05289e-05	0.927905	7.45798e-06	4.08075	2.49749e-05	5.02531e-06	0.00955834	0.0114267	2.08613e-06	0.0296616	3.513e-06	5.66681e-07	0.483415	0.474801
H10	0.0285144	0.00819487	0.00439055	0.46116	0.000258499	0.0180473	3.04815e-05	0.00619604	2.49749e-05	0.388321	0.0145657	6.04999e-05	0.000113074	0.00502734	7.05219e-06	0.00405368	0.000443695	1.77612e-06	2.09496e-05
H11	0.0269407	0.000828147	0.00872182	0.464266	4.77821e-05	0.0190544	1.27685e-05	0.00884521	5.02531e-06	0.0145657	0.397035	1.36154e-05	2.53679e-05	0.00152838	2.21009e-06	0.000490355	0.000794503	3.53261e-07	3.14456e-06
H12	0.00852693	0.0288589	0.00454508	0.000238211	0.460649	0.000138731	0.0197945	0.000114388	0.00955834	6.04999e-05	1.36154e-05	0.388269	0.0149892	1.02815e-05	0.00167886	8.2822e-06	7.12406e-06	0.000709518	0.000526158
H13	0.000608397	0.0287976	0.00911316	0.000151646	0.460972	3.24869e-05	0.0197839	2.0675e-05	0.0114267	0.000113074	2.53679e-05	0.0149892	0.3876	2.18743e-06	0.000993616	2.22632e-05	9.87247e-07	0.000710139	0.000588513
H14	0.00622183	0.000294719	0.000505426	0.0199934	1.21501e-05	0.473493	2.8542e-06	0.0290491	2.08613e-06	0.00502734	0.00152838	1.02815e-05	2.18743e-06	0.412125	5.71893e-07	0.00674177	0.00363846	3.11594e-07	1.82367e-06
H15	0.000169365	0.0070892	0.00160476	2.50395e-05	0.0203352	1.4682e-05	0.473274	9.24464e-06	0.0296616	7.05219e-06	2.21009e-06	0.00167886	0.000993616	5.71893e-07	0.413278	3.04227e-06	2.26411e-07	0.00404888	0.00662721
H16	0.00132205	0.000857855	0.00246063	0.00630712	7.49338e-05	0.0299934	5.15053e-06	0.4801	3.513e-06	0.00405368	0.000490355	8.2822e-06	2.22632e-05	0.00674177	3.04227e-06	0.41027	0.0167385	1.84267e-07	1.45813e-06
H17	0.00154548	5.09536e-05	0.000375126	0.00628161	5.03086e-06	0.0302115	7.7181e-07	0.483714	5.66681e-07	0.000443695	0.000794503	7.12406e-06	9.87247e-07	0.00363846	2.26411e-07	0.0167385	0.410548	5.04098e-08	1.39317e-07
H18	9.51623e-05	0.00145117	0.000279295	4.30699e-06	0.00654772	2.22544e-06	0.0310117	1.36649e-06	0.483415	1.77612e-06	3.53261e-07	0.000709518	0.000710139	3.11594e-07	0.00404888	1.84267e-07	5.04098e-08	0.410417	0.0160934
H19	0.000573142	0.0201831	0.00190746	2.49113e-05	0.00445915	5.8588e-06	0.0297501	2.59212e-06	0.474801	2.09496e-05	3.14456e-06	0.000526158	0.000588513	1.82367e-06	0.00662721	1.45813e-06	1.39317e-07	0.0160934	0.400153
																				0
LDM — diallyl_trisulfide_34_LIDI_matrix
	S1	S2	S3	C4	C5	C6	C7	C8	C9	H10	H11	H12	H13	H14	H15	H16	H17	H18	H19
S1	14.6188	0.0762934	0.652675	0.525694	0.00587041	0.0424131	0.000919573	0.0208523	0.000653477	0.0287155	0.028717	0.000810606	0.00846487	0.00563368	9.10542e-05	0.00124313	0.00109559	4.33547e-05	0.000550568		71.9895	22.0091
S2	0.0762934	14.6036	0.643288	0.00534433	0.539111	0.00117455	0.0329224	0.000797284	0.0193332	0.000599742	0.00642933	0.0267708	0.0289823	0.000335833	0.00833856	7.29621e-05	5.08885e-05	0.00158689	0.0206503
S3	0.652675	0.643288	14.5944	0.0382151	0.0379281	0.00920029	0.00923423	0.00508676	0.00921199	0.0103943	0.00312724	0.00872752	0.00653816	0.000330576	0.000692255	0.000241663	0.000480979	0.000269573	0.00427284
C4	0.525694	0.00534433	0.0382151	4.01371	0.000544502	0.515723	0.000158509	0.037486	0.000148601	0.462993	0.463557	4.82041e-05	0.000275291	0.019696	2.4397e-05	0.00632933	0.00634919	4.78756e-06	6.21113e-05
C5	0.00587041	0.539111	0.0379281	0.000544502	4.02422	7.4787e-05	0.512106	5.6922e-05	0.0347691	0.000156969	0.000198401	0.462285	0.4596	9.04885e-06	0.0204984	3.81807e-06	5.59052e-06	0.0064904	0.00446849
C6	0.0424131	0.00117455	0.00920029	0.515723	7.4787e-05	3.97797	3.56789e-05	0.920952	3.7988e-05	0.0186994	0.0181541	1.21683e-05	3.6243e-05	0.47343	3.85833e-06	0.0301918	0.0301714	1.20452e-06	2.59917e-05
C7	0.000919573	0.0329224	0.00923423	0.000158509	0.512106	3.56789e-05	3.98809	3.14409e-05	0.928037	2.25652e-05	0.00010221	0.0199232	0.0192776	3.23883e-06	0.473834	1.91032e-06	3.16225e-06	0.0313265	0.0294065
C8	0.0208523	0.000797284	0.00508676	0.037486	5.6922e-05	0.920952	3.14409e-05	4.0802	2.56902e-05	0.00897051	0.00638563	5.08405e-06	3.70348e-05	0.0293635	5.86182e-06	0.480686	0.483423	8.68366e-07	1.93162e-05
C9	0.000653477	0.0193332	0.00921199	0.000148601	0.0347691	3.7988e-05	0.928037	2.56902e-05	4.07625	1.4316e-05	3.21389e-05	0.0108787	0.00901395	2.31172e-06	0.029951	1.61097e-06	2.97429e-06	0.483774	0.472569
H10	0.0287155	0.000599742	0.0103943	0.462993	0.000156969	0.0186994	2.25652e-05	0.00897051	1.4316e-05	0.389771	0.0147203	3.05356e-05	0.000120263	0.00164709	2.3845e-06	0.000522091	0.000800482	5.79823e-07	5.03322e-06
H11	0.028717	0.00642933	0.00312724	0.463557	0.000198401	0.0181541	0.00010221	0.00638563	3.21389e-05	0.0147203	0.393827	1.46274e-05	5.91105e-05	0.00498684	2.03534e-05	0.00401343	0.000466485	2.04176e-06	2.60752e-05
H12	0.000810606	0.0267708	0.00872752	4.82041e-05	0.462285	1.21683e-05	0.0199232	5.08405e-06	0.0108787	3.05356e-05	1.46274e-05	0.393869	0.0149932	1.52893e-06	0.000976055	5.64728e-07	6.41493e-07	0.000706786	0.000465599
H13	0.00846487	0.0289823	0.00653816	0.000275291	0.4596	3.6243e-05	0.0192776	3.70348e-05	0.00901395	0.000120263	5.91105e-05	0.0149932	0.384785	9.58444e-06	0.00162379	2.63842e-06	1.31701e-06	0.000697313	0.000484584
H14	0.00563368	0.000335833	0.000330576	0.019696	9.04885e-06	0.47343	3.23883e-06	0.0293635	2.31172e-06	0.00164709	0.00498684	1.52893e-06	9.58444e-06	0.409027	5.53953e-07	0.00675747	0.00363203	1.6117e-07	2.20308e-06
H15	9.10542e-05	0.00833856	0.000692255	2.4397e-05	0.0204984	3.85833e-06	0.473834	5.86182e-06	0.029951	2.3845e-06	2.03534e-05	0.000976055	0.00162379	5.53953e-07	0.417094	2.65891e-07	4.65924e-07	0.00396878	0.00666238
H16	0.00124313	7.29621e-05	0.000241663	0.00632933	3.81807e-06	0.0301918	1.91032e-06	0.480686	1.61097e-06	0.000522091	0.00401343	5.64728e-07	2.63842e-06	0.00675747	2.65891e-07	0.410531	0.0167493	7.13045e-08	9.05519e-07
H17	0.00109559	5.08885e-05	0.000480979	0.00634919	5.59052e-06	0.0301714	3.16225e-06	0.483423	2.97429e-06	0.000800482	0.000466485	6.41493e-07	1.31701e-06	0.00363203	4.65924e-07	0.0167493	0.408829	9.75478e-08	1.66438e-06
H18	4.33547e-05	0.00158689	0.000269573	4.78756e-06	0.0064904	1.20452e-06	0.0313265	8.68366e-07	0.483774	5.79823e-07	2.04176e-06	0.000706786	0.000697313	1.6117e-07	0.00396878	7.13045e-08	9.75478e-08	0.41222	0.0159061
H19	0.000550568	0.0206503	0.00427284	6.21113e-05	0.00446849	2.59917e-05	0.0294065	1.93162e-05	0.472569	5.03322e-06	2.60752e-05	0.000465599	0.000484584	2.20308e-06	0.00666238	9.05519e-07	1.66438e-06	0.0159061	0.39228
																				0
LDM — diallyl_trisulfide_35_LIDI_matrix
	S1	S2	S3	C4	C5	C6	C7	C8	C9	H10	H11	H12	H13	H14	H15	H16	H17	H18	H19
S1	14.6188	0.0765474	0.651298	0.525886	0.0061957	0.0424559	0.000916832	0.0207118	0.000648654	0.0294163	0.0278773	0.000819674	0.00923397	0.0057643	8.9271e-05	0.00125935	0.00110108	4.39592e-05	0.000538354		71.9904	22.0087
S2	0.0765474	14.6022	0.642843	0.00582479	0.538936	0.00109385	0.0328247	0.000943411	0.0192766	0.00065809	0.00880824	0.0267471	0.0289293	0.000167754	0.00832839	5.49689e-05	6.18268e-05	0.00157978	0.020577
S3	0.651298	0.642843	14.5975	0.0381887	0.0378755	0.00931857	0.00915949	0.00502955	0.00911441	0.00495325	0.00700591	0.00873787	0.00642882	0.000518992	0.000691517	0.00024432	0.000476381	0.00026534	0.00420393
C4	0.525886	0.00582479	0.0381887	4.01336	0.000567674	0.515605	0.000160464	0.0374815	0.000149991	0.465315	0.4607	4.70037e-05	0.00030092	0.0196669	2.60536e-05	0.00632923	0.00634883	5.04634e-06	6.56361e-05
C5	0.0061957	0.538936	0.0378755	0.000567674	4.02472	7.00337e-05	0.512159	5.85704e-05	0.03481	0.000126707	0.000269913	0.462304	0.459355	1.48916e-05	0.0205215	3.52106e-06	4.05047e-06	0.00649278	0.0044749
C6	0.0424559	0.00109385	0.00931857	0.515605	7.00337e-05	3.97817	3.46387e-05	0.921092	3.55905e-05	0.0181792	0.0188037	1.01451e-05	3.60125e-05	0.473456	3.62811e-06	0.030219	0.0301962	1.28549e-06	2.46063e-05
C7	0.000916832	0.0328247	0.00915949	0.000160464	0.512159	3.46387e-05	3.98814	3.62902e-05	0.928068	1.6216e-05	0.000141088	0.0199028	0.0192553	3.0024e-06	0.473818	1.80549e-06	3.07337e-06	0.0313185	0.0294028
C8	0.0207118	0.000943411	0.00502955	0.0374815	5.85704e-05	0.921092	3.62902e-05	4.08009	2.31963e-05	0.00637612	0.00889976	4.12366e-06	1.85181e-05	0.0293885	7.33764e-06	0.480724	0.483458	9.61866e-07	1.88445e-05
C9	0.000648654	0.0192766	0.00911441	0.000149991	0.03481	3.55905e-05	0.928068	2.31963e-05	4.07597	8.5893e-06	4.40871e-05	0.0108794	0.00898336	1.50284e-06	0.0299402	1.23004e-06	3.04615e-06	0.483715	0.472623
H10	0.0294163	0.00065809	0.00495325	0.465315	0.000126707	0.0181792	1.6216e-05	0.00637612	8.5893e-06	0.39709	0.0146463	2.16908e-05	0.000151473	0.00504202	2.16363e-06	0.00399316	0.000462256	4.8406e-07	2.83692e-06
H11	0.0278773	0.00880824	0.00700591	0.4607	0.000269913	0.0188037	0.000141088	0.00889976	4.40871e-05	0.0146463	0.386054	1.59433e-05	4.90487e-05	0.00166046	2.88502e-05	0.000522467	0.000796256	2.27707e-06	3.58582e-05
H12	0.000819674	0.0267471	0.00873787	4.70037e-05	0.462304	1.01451e-05	0.0199028	4.12366e-06	0.0108794	2.16908e-05	1.59433e-05	0.393732	0.0149806	4.21365e-06	0.00097189	6.16841e-07	4.87516e-07	0.000705853	0.000465957
H13	0.00923397	0.0289293	0.00642882	0.00030092	0.459355	3.60125e-05	0.0192553	1.85181e-05	0.00898336	0.000151473	4.90487e-05	0.0149806	0.384428	1.21046e-05	0.00162745	2.47649e-06	8.61629e-07	0.000695839	0.000482782
H14	0.0057643	0.000167754	0.000518992	0.0196669	1.48916e-05	0.473456	3.0024e-06	0.0293885	1.50284e-06	0.00504202	0.00166046	4.21365e-06	1.21046e-05	0.409348	3.00764e-07	0.00676062	0.00364441	8.86237e-08	8.38876e-07
H15	8.9271e-05	0.00832839	0.000691517	2.60536e-05	0.0205215	3.62811e-06	0.473818	7.33764e-06	0.0299402	2.16363e-06	2.88502e-05	0.00097189	0.00162745	3.00764e-07	0.416983	2.82337e-07	4.0311e-07	0.00397047	0.00666085
H16	0.00125935	5.49689e-05	0.00024432	0.00632923	3.52106e-06	0.030219	1.80549e-06	0.480724	1.23004e-06	0.00399316	0.000522467	6.16841e-07	2.47649e-06	0.00676062	2.82337e-07	0.410543	0.0167458	5.91971e-08	8.28822e-07
H17	0.00110108	6.18268e-05	0.000476381	0.00634883	4.05047e-06	0.0301962	3.07337e-06	0.483458	3.04615e-06	0.000462256	0.000796256	4.87516e-07	8.61629e-07	0.00364441	4.0311e-07	0.0167458	0.4089	1.1345e-07	1.76707e-06
H18	4.39592e-05	0.00157978	0.00026534	5.04634e-06	0.00649278	1.28549e-06	0.0313185	9.61866e-07	0.483715	4.8406e-07	2.27707e-06	0.000705853	0.000695839	8.86237e-08	0.00397047	5.91971e-08	1.1345e-07	0.412083	0.0159051
H19	0.000538354	0.020577	0.00420393	6.56361e-05	0.0044749	2.46063e-05	0.0294028	1.88445e-05	0.472623	2.83692e-06	3.58582e-05	0.000465957	0.000482782	8.38876e-07	0.00666085	8.28822e-07	1.76707e-06	0.0159051	0.392301
																				0
LDM — diallyl_trisulfide_36_LIDI_matrix
	S1	S2	S3	C4	C5	C6	C7	C8	C9	H10	H11	H12	H13	H14	H15	H16	H17	H18	H19
S1	14.6141	0.0785645	0.654409	0.526034	0.00332103	0.0433478	0.00106386	0.0210624	0.000796842	0.0278603	0.0292536	0.000700312	0.00144175	0.00629436	0.000129082	0.00110465	0.00126102	4.41342e-05	5.60435e-05		72.0073	21.9927
S2	0.0785645	14.6171	0.653263	0.00326108	0.526101	0.00133998	0.0424177	0.00101212	0.0206716	0.000791877	0.00118974	0.0293577	0.0281279	0.00023842	0.00578006	6.84758e-05	5.72451e-05	0.00125179	0.00109782
S3	0.654409	0.653263	14.6015	0.0374737	0.0379601	0.00823636	0.00919525	0.00472602	0.00500596	0.0124676	0.00215227	0.00502277	0.00634639	0.000298199	0.000526184	0.000471549	0.000223248	0.000244193	0.000466101
C4	0.526034	0.00326108	0.0374737	4.01109	0.0020947	0.515707	0.000222757	0.0375967	0.000173941	0.46171	0.464273	0.000132569	0.00479663	0.0195838	1.67002e-05	0.00634543	0.00634949	8.73786e-06	1.97501e-05
C5	0.00332103	0.526101	0.0379601	0.0020947	4.00777	0.000248978	0.51535	7.95241e-05	0.0374267	0.000582946	0.00278888	0.465302	0.461491	5.29186e-05	0.0196819	1.10226e-05	1.0352e-05	0.0063428	0.00634243
C6	0.0433478	0.00133998	0.00823636	0.515707	0.000248978	3.97748	2.99148e-05	0.920539	2.25196e-05	0.0185074	0.0185353	2.5793e-05	0.000567615	0.47278	3.61501e-06	0.0300751	0.0302991	1.66876e-06	2.09233e-06
C7	0.00106386	0.0424177	0.00919525	0.000222757	0.51535	2.99148e-05	3.97909	1.6729e-05	0.921047	6.37905e-05	0.000194346	0.0182277	0.0190709	6.83457e-06	0.473431	1.40581e-06	1.67793e-06	0.0301887	0.030151
C8	0.0210624	0.00101212	0.00472602	0.0375967	7.95241e-05	0.920539	1.6729e-05	4.08089	5.42596e-06	0.00918112	0.0065828	1.54394e-05	0.000140108	0.0290533	2.55082e-06	0.483283	0.480858	3.71219e-07	5.8736e-07
C9	0.000796842	0.0206716	0.00500596	0.000173941	0.0374267	2.25196e-05	0.921047	5.42596e-06	4.07883	6.33014e-05	0.000183552	0.00641518	0.00899723	6.39816e-06	0.0293601	1.37477e-06	1.50211e-06	0.480572	0.48322
H10	0.0278603	0.000791877	0.0124676	0.46171	0.000582946	0.0185074	6.37905e-05	0.00918112	6.33014e-05	0.388509	0.015027	5.54216e-05	0.00104645	0.00162109	3.77222e-06	0.000786892	0.000531213	2.55056e-06	4.54859e-06
H11	0.0292536	0.00118974	0.00215227	0.464273	0.00278888	0.0185353	0.000194346	0.0065828	0.000183552	0.015027	0.404001	0.000168847	0.00537368	0.0050167	2.16259e-05	0.000477543	0.00420551	1.01664e-05	2.01248e-05
H12	0.000700312	0.0293577	0.00502277	0.000132569	0.465302	2.5793e-05	0.0182277	1.54394e-05	0.00641518	5.54216e-05	0.000168847	0.398048	0.0150009	3.67746e-06	0.00507283	9.9773e-07	1.18256e-06	0.00404149	0.000467465
H13	0.00144175	0.0281279	0.00634639	0.00479663	0.461491	0.000567615	0.0190709	0.000140108	0.00899723	0.00104645	0.00537368	0.0150009	0.395548	0.000147293	0.00164586	1.18733e-05	2.25567e-05	0.000523288	0.000788313
H14	0.00629436	0.00023842	0.000298199	0.0195838	5.29186e-05	0.47278	6.83457e-06	0.0290533	6.39816e-06	0.00162109	0.0050167	3.67746e-06	0.000147293	0.406831	1.24954e-06	0.00360403	0.00674408	3.28113e-07	6.93224e-07
H15	0.000129082	0.00578006	0.000526184	1.67002e-05	0.0196819	3.61501e-06	0.473431	2.55082e-06	0.0293601	3.77222e-06	2.16259e-05	0.00507283	0.00164586	1.24954e-06	0.409044	1.57072e-07	4.59444e-07	0.00674977	0.00363646
H16	0.00110465	6.84758e-05	0.000471549	0.00634543	1.10226e-05	0.0300751	1.40581e-06	0.483283	1.37477e-06	0.000786892	0.000477543	9.9773e-07	1.18733e-05	0.00360403	1.57072e-07	0.407677	0.0167359	8.34615e-08	7.79558e-08
H17	0.00126102	5.72451e-05	0.000223248	0.00634949	1.0352e-05	0.0302991	1.67793e-06	0.480858	1.50211e-06	0.000531213	0.00420551	1.18256e-06	2.25567e-05	0.00674408	4.59444e-07	0.0167359	0.411616	8.06881e-08	1.12864e-07
H18	4.41342e-05	0.00125179	0.000244193	8.73786e-06	0.0063428	1.66876e-06	0.0301887	3.71219e-07	0.480572	2.55056e-06	1.01664e-05	0.00404149	0.000523288	3.28113e-07	0.00674977	8.34615e-08	8.06881e-08	0.410185	0.0166999
H19	5.60435e-05	0.00109782	0.000466101	1.97501e-05	0.00634243	2.09233e-06	0.030151	5.8736e-07	0.48322	4.54859e-06	2.01248e-05	0.000467465	0.000788313	6.93224e-07	0.00363646	7.79558e-08	1.12864e-07	0.0166999	0.407962
																				0
Weighted Ensemble LDM (Σ w·LDM)
	S1	S2	S3	C4	C5	C6	C7	C8	C9	H10	H11	H12	H13	H14	H15	H16	H17	H18	H19
S1	14.6201	0.0763701	0.651789	0.527929	0.0042107	0.0402563	0.00405732	0.0212027	0.00316461	0.0280359	0.0281909	0.00126427	0.00292217	0.00608104	0.00110327	0.00136706	0.00129846	0.000248591	0.000261434		71.9757	22.0242
S2	0.0763701	14.6139	0.652654	0.00424037	0.527537	0.00465816	0.0407307	0.00365106	0.0211831	0.00215243	0.00168628	0.0280965	0.0280931	0.00132897	0.006325	0.0003322	0.000246432	0.0014335	0.00214687
S3	0.651789	0.652654	14.5855	0.0377108	0.0375085	0.0102813	0.0108711	0.00712525	0.0075847	0.00669189	0.00770427	0.0084068	0.00521752	0.00128543	0.000782626	0.000528265	0.00123848	0.00104659	0.000683385
C4	0.527929	0.00424037	0.0377108	4.01278	0.000712707	0.516767	0.000382569	0.0370183	0.000612451	0.463065	0.462817	0.000145329	0.000450146	0.0197022	5.28138e-05	0.00628249	0.00635434	0.00024346	4.43182e-05
C5	0.0042107	0.527537	0.0375085	0.000712707	4.01325	0.00150752	0.516179	0.00220135	0.0370424	0.000368677	0.000146253	0.46256	0.461809	0.000172362	0.0197307	0.00026016	0.00011968	0.0063396	0.00623589
C6	0.0402563	0.00465816	0.0102813	0.516767	0.00150752	3.96912	0.000261578	0.916345	0.000221516	0.0188837	0.0185991	0.000445425	0.00203656	0.472245	9.35322e-05	0.0301656	0.0301172	3.83708e-05	9.03364e-05
C7	0.00405732	0.0407307	0.0108711	0.000382569	0.516179	0.000261578	3.97188	0.000301993	0.918165	0.000127349	0.000330918	0.0187424	0.0184746	0.000154002	0.472699	0.000194811	3.84322e-05	0.0302046	0.0301294
C8	0.0212027	0.00365106	0.00712525	0.0370183	0.00220135	0.916345	0.000301993	4.07819	0.000324993	0.00809498	0.00764754	0.00102215	0.00249399	0.0289228	7.63588e-05	0.482485	0.481052	6.25929e-05	5.44111e-05
C9	0.00316461	0.0211831	0.0075847	0.000612451	0.0370424	0.000221516	0.918165	0.000324993	4.07904	0.000286338	0.000613457	0.00837222	0.00746113	0.000133344	0.0290397	0.000533438	3.5986e-05	0.480777	0.482712
H10	0.0280359	0.00215243	0.00669189	0.463065	0.000368677	0.0188837	0.000127349	0.00809498	0.000286338	0.394852	0.0145928	7.6933e-05	0.000422182	0.00304055	2.17496e-05	0.00109147	0.00168582	0.00027912	1.98755e-05
H11	0.0281909	0.00168628	0.00770427	0.462817	0.000146253	0.0185991	0.000330918	0.00764754	0.000613457	0.0145928	0.39273	2.99444e-05	6.58384e-05	0.00348149	2.43653e-05	0.000786099	0.0023771	0.000151204	3.49348e-05
H12	0.00126427	0.0280965	0.0084068	0.000145329	0.46256	0.000445425	0.0187424	0.00102215	0.00837222	7.6933e-05	2.99444e-05	0.392378	0.0146273	3.57923e-05	0.00267688	6.16382e-05	0.00015483	0.00163724	0.000769964
H13	0.00292217	0.0280931	0.00521752	0.000450146	0.461809	0.00203656	0.0184746	0.00249399	0.00746113	0.000422182	6.58384e-05	0.0146273	0.392581	0.000312297	0.00363691	0.000454027	8.5121e-05	0.00257371	0.000738828
H14	0.00608104	0.00132897	0.00128543	0.0197022	0.000172362	0.472245	0.000154002	0.0289228	0.000133344	0.00304055	0.00348149	3.57923e-05	0.000312297	0.408977	8.3745e-05	0.00420857	0.0061434	1.58323e-05	5.57394e-05
H15	0.00110327	0.006325	0.000782626	5.28138e-05	0.0197307	9.35322e-05	0.472699	7.63588e-05	0.0290397	2.17496e-05	2.43653e-05	0.00267688	0.00363691	8.3745e-05	0.409261	1.47461e-05	1.23718e-05	0.00637398	0.00400443
H16	0.00136706	0.0003322	0.000528265	0.00628249	0.00026016	0.0301656	0.000194811	0.482485	0.000533438	0.00109147	0.000786099	6.16382e-05	0.000454027	0.00420857	1.47461e-05	0.409842	0.0167592	0.000107275	6.95723e-05
H17	0.00129846	0.000246432	0.00123848	0.00635434	0.00011968	0.0301172	3.84322e-05	0.481052	3.5986e-05	0.00168582	0.0023771	0.00015483	8.5121e-05	0.0061434	1.23718e-05	0.0167592	0.411047	6.20686e-06	3.65905e-06
H18	0.000248591	0.0014335	0.00104659	0.00024346	0.0063396	3.83708e-05	0.0302046	6.25929e-05	0.480777	0.00027912	0.000151204	0.00163724	0.00257371	1.58323e-05	0.00637398	0.000107275	6.20686e-06	0.411436	0.0167345
H19	0.000261434	0.00214687	0.000683385	4.43182e-05	0.00623589	9.03364e-05	0.0301294	5.44111e-05	0.482712	1.98755e-05	3.49348e-05	0.000769964	0.000738828	5.57394e-05	0.00400443	6.95723e-05	3.65905e-06	0.0167345	0.408785
																				0

## Sheet: Weighted_LDM
Weighted LDM — diallyl_trisulfide_1_LIDI_matrix (× 0.197087)
	S1	S2	S3	C4	C5	C6	C7	C8	C9	H10	H11	H12	H13	H14	H15	H16	H17	H18	H19	Total
S1	2.87931	0.014839	0.128308	0.103966	0.000647	0.007664	0.002162	0.004272	0.00179	0.005307	0.005731	0.000102	0.000202	0.001226	0.000499	0.000297	0.000259	7.17e-05	0.00012	18.5261
S2	0.014839	2.87928	0.128276	0.000647	0.103918	0.002162	0.007659	0.00179	0.004269	0.000202	0.000102	0.005723	0.005306	0.000499	0.001226	0.00012	7.16e-05	0.000258	0.000297
S3	0.128308	0.128276	2.87301	0.00751	0.007508	0.002404	0.002401	0.001909	0.001907	0.001642	0.001258	0.001258	0.001642	0.000122	0.000122	6.48e-05	0.000497	0.000497	6.48e-05
C4	0.103966	0.000647	0.00751	0.790548	0.000127	0.101892	8.68e-05	0.007254	0.000143	0.091445	0.091418	1.98e-05	3.28e-05	0.003909	1.34e-05	0.001238	0.001253	1.12e-05	9.26e-06
C5	0.000647	0.103918	0.007508	0.000127	0.790509	8.68e-05	0.101882	0.000143	0.007251	3.28e-05	1.99e-05	0.091411	0.091442	1.34e-05	0.003903	9.27e-06	1.12e-05	0.001253	0.001238
C6	0.007664	0.002162	0.002404	0.101892	8.68e-05	0.781415	1.69e-05	0.180203	1.71e-05	0.003803	0.003624	2.68e-05	4.44e-06	0.093098	5.96e-06	0.005955	0.00591	1.84e-06	1.17e-06
C7	0.002162	0.007659	0.002401	8.68e-05	0.101882	1.69e-05	0.781416	1.71e-05	0.180207	4.43e-06	2.68e-05	0.003624	0.003803	5.97e-06	0.093097	1.17e-06	1.84e-06	0.005909	0.005956
C8	0.004272	0.00179	0.001909	0.007254	0.000143	0.180203	1.71e-05	0.803573	3.02e-05	0.001842	0.001252	2.46e-05	5.2e-06	0.005663	2.3e-06	0.095306	0.094669	1.49e-06	2.18e-06
C9	0.00179	0.004269	0.001907	0.000143	0.007251	1.71e-05	0.180207	3.02e-05	0.803575	5.19e-06	2.46e-05	0.001249	0.001842	2.3e-06	0.005665	2.18e-06	1.49e-06	0.094664	0.095311
H10	0.005307	0.000202	0.001642	0.091445	3.28e-05	0.003803	4.43e-06	0.001842	5.19e-06	0.078461	0.002894	4.83e-06	8.56e-06	0.000279	8.93e-07	0.000156	9.85e-05	1.59e-06	2.66e-07
H11	0.005731	0.000102	0.001258	0.091418	1.99e-05	0.003624	2.68e-05	0.001252	2.46e-05	0.002894	0.0779	1.26e-06	4.84e-06	0.00102	8.13e-06	9.08e-05	0.000841	1.13e-06	1.57e-06
H12	0.000102	0.005723	0.001258	1.98e-05	0.091411	2.68e-05	0.003624	2.46e-05	0.001249	4.83e-06	1.26e-06	0.077896	0.002894	8.15e-06	0.00102	1.57e-06	1.12e-06	0.00084	9.08e-05
H13	0.000202	0.005306	0.001642	3.28e-05	0.091442	4.44e-06	0.003803	5.2e-06	0.001842	8.56e-06	4.84e-06	0.002894	0.078462	8.93e-07	0.000279	2.66e-07	1.59e-06	9.85e-05	0.000156
H14	0.001226	0.000499	0.000122	0.003909	1.34e-05	0.093098	5.97e-06	0.005663	2.3e-06	0.000279	0.00102	8.15e-06	8.93e-07	0.080788	4.14e-06	0.000716	0.001328	3.51e-07	1.59e-07
H15	0.000499	0.001226	0.000122	1.34e-05	0.003903	5.96e-06	0.093097	2.3e-06	0.005665	8.93e-07	8.13e-06	0.00102	0.000279	4.14e-06	0.080789	1.58e-07	3.5e-07	0.001328	0.000716
H16	0.000297	0.00012	6.48e-05	0.001238	9.27e-06	0.005955	1.17e-06	0.095306	2.18e-06	0.000156	9.08e-05	1.57e-06	2.66e-07	0.000716	1.58e-07	0.08085	0.003305	1.06e-07	1.94e-07
H17	0.000259	7.16e-05	0.000497	0.001253	1.12e-05	0.00591	1.84e-06	0.094669	1.49e-06	9.85e-05	0.000841	1.12e-06	1.59e-06	0.001328	3.5e-07	0.003305	0.081019	3.34e-07	1.06e-07
H18	7.17e-05	0.000258	0.000497	1.12e-05	0.001253	1.84e-06	0.005909	1.49e-06	0.094664	1.59e-06	1.13e-06	0.00084	9.85e-05	3.51e-07	0.001328	1.06e-07	3.34e-07	0.081018	0.003305
H19	0.00012	0.000297	6.48e-05	9.26e-06	0.001238	1.17e-06	0.005956	2.18e-06	0.095311	2.66e-07	1.57e-06	9.08e-05	0.000156	1.59e-07	0.000716	1.94e-07	1.06e-07	0.003305	0.080849
Weighted LDM — diallyl_trisulfide_2_LIDI_matrix (× 0.0449842)
	S1	S2	S3	C4	C5	C6	C7	C8	C9	H10	H11	H12	H13	H14	H15	H16	H17	H18	H19	Total
S1	0.658155	0.00344	0.029255	0.023685	0.000275	0.001831	4.48e-05	0.001048	3.53e-05	0.001283	0.001212	3.7e-05	0.000378	0.000282	1.36e-05	6.96e-05	5.92e-05	4e-05	2.32e-06	4.22849
S2	0.00344	0.658153	0.029253	0.000276	0.023684	4.47e-05	0.00183	3.53e-05	0.001047	0.000378	3.7e-05	0.001211	0.001283	1.36e-05	0.000282	2.32e-06	4e-05	5.91e-05	6.96e-05
S3	0.029255	0.029253	0.654605	0.001678	0.001676	0.000666	0.000667	0.000618	0.000618	0.000196	0.000391	0.000391	0.000196	2.26e-05	2.26e-05	1.68e-05	0.000111	0.00011	1.68e-05
C4	0.023685	0.000276	0.001678	0.180564	2.53e-05	0.023279	1.11e-05	0.00166	7.87e-06	0.020747	0.020891	2.02e-06	1.04e-05	0.000899	5.59e-07	0.000283	0.000284	2.93e-06	2.18e-07
C5	0.000275	0.023684	0.001676	2.53e-05	0.180567	1.11e-05	0.023284	7.86e-06	0.001661	1.04e-05	2.02e-06	0.020892	0.020746	5.59e-07	0.000899	2.17e-07	2.92e-06	0.000284	0.000283
C6	0.001831	4.47e-05	0.000666	0.023279	1.11e-05	0.17844	2.21e-06	0.041238	1.59e-06	0.000812	0.000858	2.26e-06	5.84e-06	0.021298	1.63e-07	0.00136	0.001349	1.49e-06	6.23e-08
C7	4.48e-05	0.00183	0.000667	1.11e-05	0.023284	2.21e-06	0.178452	1.59e-06	0.041241	5.84e-06	2.26e-06	0.000859	0.000813	1.63e-07	0.021301	6.23e-08	1.49e-06	0.001349	0.00136
C8	0.001048	3.53e-05	0.000618	0.00166	7.86e-06	0.041238	1.59e-06	0.183358	1.41e-06	0.000279	0.000398	1.41e-06	4.58e-06	0.001307	1.1e-07	0.02176	0.021596	1.57e-06	3.83e-08
C9	3.53e-05	0.001047	0.000618	7.87e-06	0.001661	1.59e-06	0.041241	1.41e-06	0.183363	4.58e-06	1.41e-06	0.000398	0.000279	1.1e-07	0.001307	3.83e-08	1.57e-06	0.021595	0.021762
H10	0.001283	0.000378	0.000196	0.020747	1.04e-05	0.000812	5.84e-06	0.000279	4.58e-06	0.017493	0.000656	6.7e-07	2.5e-06	0.000226	4.61e-07	2e-05	0.000183	3.74e-07	2.96e-07
H11	0.001212	3.7e-05	0.000391	0.020891	2.02e-06	0.000858	2.26e-06	0.000398	1.41e-06	0.000656	0.017887	2.6e-07	6.7e-07	6.88e-05	1.21e-07	3.58e-05	2.21e-05	8.94e-08	2.93e-08
H12	3.7e-05	0.001211	0.000391	2.02e-06	0.020892	2.26e-06	0.000859	1.41e-06	0.000398	6.7e-07	2.6e-07	0.017887	0.000656	1.21e-07	6.88e-05	2.93e-08	8.94e-08	2.21e-05	3.58e-05
H13	0.000378	0.001283	0.000196	1.04e-05	0.020746	5.84e-06	0.000813	4.58e-06	0.000279	2.5e-06	6.7e-07	0.000656	0.017493	4.61e-07	0.000226	2.95e-07	3.73e-07	0.000183	2e-05
H14	0.000282	1.36e-05	2.26e-05	0.000899	5.59e-07	0.021298	1.63e-07	0.001307	1.1e-07	0.000226	6.88e-05	1.21e-07	4.61e-07	0.018546	2.38e-08	0.000164	0.000303	4.68e-08	8.75e-09
H15	1.36e-05	0.000282	2.26e-05	5.59e-07	0.000899	1.63e-07	0.021301	1.1e-07	0.001307	4.61e-07	1.21e-07	6.88e-05	0.000226	2.38e-08	0.018546	8.75e-09	4.68e-08	0.000303	0.000164
H16	6.96e-05	2.32e-06	1.68e-05	0.000283	2.17e-07	0.00136	6.23e-08	0.02176	3.83e-08	2e-05	3.58e-05	2.93e-08	2.95e-07	0.000164	8.75e-09	0.01848	0.000753	8.14e-08	2.25e-09
H17	5.92e-05	4e-05	0.000111	0.000284	2.92e-06	0.001349	1.49e-06	0.021596	1.57e-06	0.000183	2.21e-05	8.94e-08	3.73e-07	0.000303	4.68e-08	0.000753	0.01846	9.53e-08	8.14e-08
H18	4e-05	5.91e-05	0.00011	2.93e-06	0.000284	1.49e-06	0.001349	1.57e-06	0.021595	3.74e-07	8.94e-08	2.21e-05	0.000183	4.68e-08	0.000303	8.14e-08	9.53e-08	0.018459	0.000753
H19	2.32e-06	6.96e-05	1.68e-05	2.18e-07	0.000283	6.23e-08	0.00136	3.83e-08	0.021762	2.96e-07	2.93e-08	3.58e-05	2e-05	8.75e-09	0.000164	2.25e-09	8.14e-08	0.000753	0.01848
Weighted LDM — diallyl_trisulfide_3_LIDI_matrix (× 0.0409223)
	S1	S2	S3	C4	C5	C6	C7	C8	C9	H10	H11	H12	H13	H14	H15	H16	H17	H18	H19	Total
S1	0.598873	0.003128	0.026737	0.021583	0.000196	0.001564	4.02e-05	0.000877	2.63e-05	0.001202	0.001104	3.24e-05	0.000229	0.000252	1.11e-05	6.2e-05	5.29e-05	1.92e-05	1.44e-06	3.8467
S2	0.003128	0.597665	0.026562	0.00014	0.021563	0.000503	0.001655	0.000389	0.000942	2.13e-05	4.07e-05	0.001104	0.001173	0.000132	0.000261	2.7e-05	1.48e-05	5.36e-05	6.31e-05
S3	0.026737	0.026562	0.595988	0.001551	0.001541	0.000486	0.000606	0.000377	0.000555	0.000242	0.000342	0.000355	0.000198	2.56e-05	2.12e-05	1.29e-05	9.11e-05	0.000107	1.53e-05
C4	0.021583	0.00014	0.001551	0.164153	2.49e-05	0.021166	9.49e-06	0.001517	6.01e-06	0.018977	0.018976	2.98e-06	9.57e-06	0.000811	4.96e-07	0.000257	0.000262	1.76e-06	1e-07
C5	0.000196	0.021563	0.001541	2.49e-05	0.164203	1.62e-05	0.021177	2.71e-05	0.001506	4.98e-06	5.31e-06	0.019003	0.018924	2.81e-06	0.000817	1.87e-06	2.19e-06	0.000259	0.000257
C6	0.001564	0.000503	0.000486	0.021166	1.62e-05	0.162209	6.82e-06	0.037412	6.12e-06	0.000752	0.000787	7.32e-07	2.3e-06	0.019318	4.15e-07	0.001235	0.001229	7.68e-07	3.73e-07
C7	4.02e-05	0.001655	0.000606	9.49e-06	0.021177	6.82e-06	0.162343	6.94e-06	0.037526	6.67e-07	2.52e-06	0.000786	0.000748	1.72e-06	0.019374	4.61e-07	4.69e-07	0.001229	0.001239
C8	0.000877	0.000389	0.000377	0.001517	2.71e-05	0.037412	6.94e-06	0.166815	7.15e-06	0.000263	0.000388	6.79e-07	1.59e-06	0.00117	2.37e-07	0.019785	0.019659	8.26e-07	4.98e-07
C9	2.63e-05	0.000942	0.000555	6.01e-06	0.001506	6.12e-06	0.037526	7.15e-06	0.166833	5.92e-07	1.3e-06	0.000366	0.000255	9.82e-07	0.00119	4.92e-07	3.89e-07	0.019655	0.019799
H10	0.001202	2.13e-05	0.000242	0.018977	4.98e-06	0.000752	6.67e-07	0.000263	5.92e-07	0.016148	0.000599	9.48e-07	3.93e-06	0.000212	7.57e-08	1.91e-05	0.000177	3.88e-07	2.62e-08
H11	0.001104	4.07e-05	0.000342	0.018976	5.31e-06	0.000787	2.52e-06	0.000388	1.3e-06	0.000599	0.016253	7.8e-07	7.68e-07	5.63e-05	1.47e-07	3.23e-05	2.06e-05	1.05e-07	3.47e-08
H12	3.24e-05	0.001104	0.000355	2.98e-06	0.019003	7.32e-07	0.000786	6.79e-07	0.000366	9.48e-07	7.8e-07	0.016306	0.000601	2.36e-07	6.25e-05	4.23e-08	2.74e-07	2.02e-05	3.25e-05
H13	0.000229	0.001173	0.000198	9.57e-06	0.018924	2.3e-06	0.000748	1.59e-06	0.000255	3.93e-06	7.68e-07	0.000601	0.016065	8.33e-07	0.000208	1.36e-07	1.64e-07	0.000168	1.84e-05
H14	0.000252	0.000132	2.56e-05	0.000811	2.81e-06	0.019318	1.72e-06	0.00117	9.82e-07	0.000212	5.63e-05	2.36e-07	8.33e-07	0.016732	1.39e-07	0.000148	0.000275	7.38e-08	7.97e-08
H15	1.11e-05	0.000261	2.12e-05	4.96e-07	0.000817	4.15e-07	0.019374	2.37e-07	0.00119	7.57e-08	1.47e-07	6.25e-05	0.000208	1.39e-07	0.016884	1.92e-08	1.64e-08	0.000277	0.000149
H16	6.2e-05	2.7e-05	1.29e-05	0.000257	1.87e-06	0.001235	4.61e-07	0.019785	4.92e-07	1.91e-05	3.23e-05	4.23e-08	1.36e-07	0.000148	1.92e-08	0.01677	0.000686	5.18e-08	3.62e-08
H17	5.29e-05	1.48e-05	9.11e-05	0.000262	2.19e-06	0.001229	4.69e-07	0.019659	3.89e-07	0.000177	2.06e-05	2.74e-07	1.64e-07	0.000275	1.64e-08	0.000686	0.01683	6.62e-08	1.92e-08
H18	1.92e-05	5.36e-05	0.000107	1.76e-06	0.000259	7.68e-07	0.001229	8.26e-07	0.019655	3.88e-07	1.05e-07	2.02e-05	0.000168	7.38e-08	0.000277	5.18e-08	6.62e-08	0.016826	0.000687
H19	1.44e-06	6.31e-05	1.53e-05	1e-07	0.000257	3.73e-07	0.001239	4.98e-07	0.019799	2.62e-08	3.47e-08	3.25e-05	1.84e-05	7.97e-08	0.000149	3.62e-08	1.92e-08	0.000687	0.016832
Weighted LDM — diallyl_trisulfide_4_LIDI_matrix (× 0.0409223)
	S1	S2	S3	C4	C5	C6	C7	C8	C9	H10	H11	H12	H13	H14	H15	H16	H17	H18	H19	Total
S1	0.598504	0.003175	0.026611	0.021568	0.000175	0.00174	4.17e-05	0.000973	2.01e-05	0.001142	0.00109	3.55e-05	0.000135	0.000252	1.02e-05	4.91e-05	6.3e-05	1.84e-05	1.04e-06	3.84672
S2	0.003175	0.59813	0.026753	0.00015	0.021778	5.58e-05	0.001544	4.1e-05	0.000745	3.83e-05	3.18e-05	0.00112	0.00118	8.41e-06	0.000344	1.58e-05	2.05e-06	4.93e-05	6.33e-05
S3	0.026611	0.026753	0.596121	0.001525	0.001517	0.000469	0.000636	0.000457	0.000273	0.000235	0.000339	0.000362	0.000112	1.8e-05	4.79e-05	0.000102	1.32e-05	1.2e-05	1.07e-05
C4	0.021568	0.00015	0.001525	0.164017	5.8e-05	0.021134	3.26e-05	0.001489	7.41e-05	0.018769	0.019033	4.68e-06	9.43e-05	0.000819	3.05e-06	0.000229	0.000258	9.38e-05	3.71e-06
C5	0.000175	0.021778	0.001517	5.8e-05	0.164349	6.51e-06	0.02112	6.54e-06	0.001509	0.000113	6.41e-06	0.018876	0.018926	2e-06	0.000798	9.68e-06	3.75e-07	0.000253	0.000256
C6	0.00174	5.58e-05	0.000469	0.021134	6.51e-06	0.162514	6.67e-06	0.037565	2.2e-05	0.000742	0.000787	1.2e-06	8.86e-06	0.019377	4.16e-07	0.0012	0.001245	1.2e-05	3.25e-06
C7	4.17e-05	0.001544	0.000636	3.26e-05	0.02112	6.67e-06	0.162205	6.71e-05	0.037402	7.6e-05	2.27e-06	0.000799	0.000754	5.05e-06	0.019281	0.000173	6.24e-06	0.001234	0.001226
C8	0.000973	4.1e-05	0.000457	0.001489	6.54e-06	0.037565	6.71e-05	0.167019	0.000201	0.000232	0.000352	2.98e-06	2.06e-06	0.001189	2.36e-06	0.019344	0.019806	4.1e-05	2.05e-05
C9	2.01e-05	0.000745	0.000273	7.41e-05	0.001509	2.2e-05	0.037402	0.000201	0.166849	0.000216	4.6e-06	0.000436	0.000258	1.03e-05	0.001168	0.000519	1.6e-05	0.019551	0.019736
H10	0.001142	3.83e-05	0.000235	0.018769	0.000113	0.000742	7.6e-05	0.000232	0.000216	0.016003	0.000593	1e-05	0.000163	0.000197	7.79e-06	0.000131	1.54e-05	0.000209	1.25e-05
H11	0.00109	3.18e-05	0.000339	0.019033	6.41e-06	0.000787	2.27e-06	0.000352	4.6e-06	0.000593	0.016328	3.54e-07	4.82e-06	6.74e-05	2.86e-07	1.83e-05	3.25e-05	4.19e-06	1.85e-07
H12	3.55e-05	0.00112	0.000362	4.68e-06	0.018876	1.2e-06	0.000799	2.98e-06	0.000436	1e-05	3.54e-07	0.016007	0.0006	1.96e-07	3.97e-05	5.89e-06	2.69e-07	2.01e-05	3.02e-05
H13	0.000135	0.00118	0.000112	9.43e-05	0.018926	8.86e-06	0.000754	2.06e-06	0.000258	0.000163	4.82e-06	0.0006	0.016279	4.34e-06	0.000209	1.25e-06	9.25e-08	0.000166	1.89e-05
H14	0.000252	8.41e-06	1.8e-05	0.000819	2e-06	0.019377	5.05e-06	0.001189	1.03e-05	0.000197	6.74e-05	1.96e-07	4.34e-06	0.016883	2.88e-07	0.000261	0.000151	5.55e-06	1.4e-06
H15	1.02e-05	0.000344	4.79e-05	3.05e-06	0.000798	4.16e-07	0.019281	2.36e-06	0.001168	7.79e-06	2.86e-07	3.97e-05	0.000209	2.88e-07	0.016551	5.45e-06	2.47e-07	0.000273	0.000148
H16	4.91e-05	1.58e-05	0.000102	0.000229	9.68e-06	0.0012	0.000173	0.019344	0.000519	0.000131	1.83e-05	5.89e-06	1.25e-06	0.000261	5.45e-06	0.016202	0.000659	9.87e-05	6.76e-05
H17	6.3e-05	2.05e-06	1.32e-05	0.000258	3.75e-07	0.001245	6.24e-06	0.019806	1.6e-05	1.54e-05	3.25e-05	2.69e-07	9.25e-08	0.000151	2.47e-07	0.000659	0.016854	4.19e-06	1.17e-06
H18	1.84e-05	4.93e-05	1.2e-05	9.38e-05	0.000253	1.2e-05	0.001234	4.1e-05	0.019551	0.000209	4.19e-06	2.01e-05	0.000166	5.55e-06	0.000273	9.87e-05	4.19e-06	0.016911	0.000688
H19	1.04e-06	6.33e-05	1.07e-05	3.71e-06	0.000256	3.25e-06	0.001226	2.05e-05	0.019736	1.25e-05	1.85e-07	3.02e-05	1.89e-05	1.4e-06	0.000148	6.76e-05	1.17e-06	0.000688	0.016677
Weighted LDM — diallyl_trisulfide_5_LIDI_matrix (× 0.01013)
	S1	S2	S3	C4	C5	C6	C7	C8	C9	H10	H11	H12	H13	H14	H15	H16	H17	H18	H19	Total
S1	0.148211	0.000774	0.006588	0.005336	5.47e-05	0.000413	1.22e-05	0.000236	8.39e-06	0.000273	0.000289	6.18e-06	6.55e-05	6.34e-05	3.43e-06	1.57e-05	1.34e-05	5.36e-07	7.38e-07	0.952222
S2	0.000774	0.148152	0.006594	5.92e-05	0.005326	9.92e-06	0.00043	7.7e-06	0.000211	8.36e-06	8e-05	0.000291	0.000292	2.97e-06	5.76e-05	4.93e-07	8.12e-06	1.11e-05	1.26e-05
S3	0.006588	0.006594	0.14769	0.000379	0.000385	0.000151	9.3e-05	0.00014	5.13e-05	8.83e-05	4.5e-05	0.000105	3.17e-05	5.14e-06	3.35e-06	3.81e-06	2.52e-05	4.86e-06	2.44e-06
C4	0.005336	5.92e-05	0.000379	0.040667	5.68e-06	0.005243	7.94e-07	0.000374	6.03e-07	0.004706	0.004674	1.6e-06	1.9e-06	0.000202	8.83e-08	6.37e-05	6.39e-05	6.02e-08	3.92e-08
C5	5.47e-05	0.005326	0.000385	5.68e-06	0.040655	2.42e-06	0.005224	1.68e-06	0.000379	5.02e-07	2.52e-06	0.00469	0.004696	1.18e-07	0.000199	4.57e-08	6.94e-07	6.43e-05	6.42e-05
C6	0.000413	9.92e-06	0.000151	0.005243	2.42e-06	0.040187	5.41e-07	0.009287	3.76e-07	0.000193	0.000183	3.71e-07	1.11e-06	0.004797	3.93e-08	0.000306	0.000304	4.34e-08	2.12e-08
C7	1.22e-05	0.00043	9.3e-05	7.94e-07	0.005224	5.41e-07	0.040296	3.29e-07	0.00933	1.38e-07	3.75e-07	0.00019	0.000184	4.11e-08	0.004796	6.18e-09	6.09e-08	0.000306	0.000306
C8	0.000236	7.7e-06	0.00014	0.000374	1.68e-06	0.009287	3.29e-07	0.041294	2.12e-07	8.98e-05	6.28e-05	2.43e-07	9.17e-07	0.000294	3.18e-08	0.0049	0.004863	2.35e-08	1.47e-08
C9	8.39e-06	0.000211	5.13e-05	6.03e-07	0.000379	3.76e-07	0.00933	2.12e-07	0.041334	6.49e-08	3.7e-07	9.12e-05	6.47e-05	2.73e-08	0.000297	5.83e-09	1e-07	0.004897	0.00487
H10	0.000273	8.36e-06	8.83e-05	0.004706	5.02e-07	0.000193	1.38e-07	8.98e-05	6.49e-08	0.004026	0.000148	2.67e-07	1.24e-07	1.55e-05	1.81e-08	8.05e-06	4.97e-06	7.78e-09	5.8e-09
H11	0.000289	8e-05	4.5e-05	0.004674	2.52e-06	0.000183	3.75e-07	6.28e-05	3.7e-07	0.000148	0.00394	1.05e-06	6e-07	5.1e-05	9.13e-08	4.5e-06	4.11e-05	1.45e-08	2.61e-08
H12	6.18e-06	0.000291	0.000105	1.6e-06	0.00469	3.71e-07	0.00019	2.43e-07	9.12e-05	2.67e-07	1.05e-06	0.003947	0.000149	2.36e-08	1.66e-05	9.79e-09	2.19e-07	8.11e-06	5.29e-06
H13	6.55e-05	0.000292	3.17e-05	1.9e-06	0.004696	1.11e-06	0.000184	9.17e-07	6.47e-05	1.24e-07	6e-07	0.000149	0.003991	8.08e-08	5.06e-05	5.86e-08	6.72e-08	4.73e-06	4.07e-05
H14	6.34e-05	2.97e-06	5.14e-06	0.000202	1.18e-07	0.004797	4.11e-08	0.000294	2.73e-08	1.55e-05	5.1e-05	2.36e-08	8.08e-08	0.004176	6.86e-09	3.69e-05	6.83e-05	1.89e-09	1.81e-09
H15	3.43e-06	5.76e-05	3.35e-06	8.83e-08	0.000199	3.93e-08	0.004796	3.18e-08	0.000297	1.81e-08	9.13e-08	1.66e-05	5.06e-05	6.86e-09	0.004144	1.61e-09	5.42e-09	3.68e-05	6.85e-05
H16	1.57e-05	4.93e-07	3.81e-06	6.37e-05	4.57e-08	0.000306	6.18e-09	0.0049	5.83e-09	8.05e-06	4.5e-06	9.79e-09	5.86e-08	3.69e-05	1.61e-09	0.004161	0.00017	5.81e-10	5.04e-10
H17	1.34e-05	8.12e-06	2.52e-05	6.39e-05	6.94e-07	0.000304	6.09e-08	0.004863	1e-07	4.97e-06	4.11e-05	2.19e-07	6.72e-08	6.83e-05	5.42e-09	0.00017	0.004155	4.21e-09	4.18e-09
H18	5.36e-07	1.11e-05	4.86e-06	6.02e-08	6.43e-05	4.34e-08	0.000306	2.35e-08	0.004897	7.78e-09	1.45e-08	8.11e-06	4.73e-06	1.89e-09	3.68e-05	5.81e-10	4.21e-09	0.004143	0.00017
H19	7.38e-07	1.26e-05	2.44e-06	3.92e-08	6.42e-05	2.12e-08	0.000306	1.47e-08	0.00487	5.8e-09	2.61e-08	5.29e-06	4.07e-05	1.81e-09	6.85e-05	5.04e-10	4.18e-09	0.00017	0.00416
Weighted LDM — diallyl_trisulfide_6_LIDI_matrix (× 0.00905571)
	S1	S2	S3	C4	C5	C6	C7	C8	C9	H10	H11	H12	H13	H14	H15	H16	H17	H18	H19	Total
S1	0.132481	0.000694	0.005886	0.004769	5.32e-05	0.000368	1.01e-05	0.000211	8.8e-06	0.000244	0.000259	8.02e-05	5.93e-06	5.62e-05	1.49e-06	1.19e-05	1.4e-05	5.09e-07	5.75e-07	0.851236
S2	0.000694	0.13244	0.00588	5.56e-05	0.004765	8.91e-06	0.000384	7.08e-06	0.000187	7.51e-06	7.73e-05	0.000253	0.000267	2.73e-06	5.27e-05	8.09e-06	4.7e-07	1.14e-05	9.98e-06
S3	0.005886	0.00588	0.132053	0.000339	0.000344	0.000134	8.42e-05	0.000124	4.53e-05	7.9e-05	3.98e-05	6.37e-05	4.43e-05	4.54e-06	4.71e-06	2.23e-05	3.39e-06	2.2e-06	4.31e-06
C4	0.004769	5.56e-05	0.000339	0.036352	5.29e-06	0.004688	6.66e-07	0.000335	5.57e-07	0.004205	0.004175	2.31e-06	1.13e-06	0.000181	1.36e-07	5.7e-05	5.69e-05	3.33e-08	3.95e-08
C5	5.32e-05	0.004765	0.000344	5.29e-06	0.036342	2.17e-06	0.004669	1.54e-06	0.000339	4.34e-07	2.46e-06	0.004172	0.004214	1.1e-07	0.000178	6.89e-07	4.5e-08	5.73e-05	5.75e-05
C6	0.000368	8.91e-06	0.000134	0.004688	2.17e-06	0.035925	4.72e-07	0.008303	3.85e-07	0.000173	0.000164	1.41e-06	2.01e-07	0.004288	3.27e-08	0.000272	0.000274	2.07e-08	4.01e-08
C7	1.01e-05	0.000384	8.42e-05	6.66e-07	0.004669	4.72e-07	0.036024	2.92e-07	0.008341	9.6e-08	3.08e-07	0.00017	0.000165	3.1e-08	0.004287	5.56e-08	8.23e-09	0.000274	0.000274
C8	0.000211	7.08e-06	0.000124	0.000335	1.54e-06	0.008303	2.92e-07	0.036912	2.02e-07	8.01e-05	5.61e-05	1.16e-06	1.19e-07	0.000263	2.31e-08	0.004347	0.00438	1.1e-08	2.35e-08
C9	8.8e-06	0.000187	4.53e-05	5.57e-07	0.000339	3.85e-07	0.008341	2.02e-07	0.036948	4.09e-08	1.8e-07	8.09e-05	5.76e-05	2.13e-08	0.000266	6.82e-08	9.8e-09	0.004353	0.004378
H10	0.000244	7.51e-06	7.9e-05	0.004205	4.34e-07	0.000173	9.6e-08	8.01e-05	4.09e-08	0.003598	0.000132	1.3e-07	1.75e-07	1.39e-05	3.14e-08	4.44e-06	7.2e-06	4.89e-09	4.79e-09
H11	0.000259	7.73e-05	3.98e-05	0.004175	2.46e-06	0.000164	3.08e-07	5.61e-05	1.8e-07	0.000132	0.003519	4.76e-07	1.22e-06	4.55e-05	1.05e-07	3.68e-05	4.02e-06	2.18e-08	9.1e-09
H12	8.02e-05	0.000253	6.37e-05	2.31e-06	0.004172	1.41e-06	0.00017	1.16e-06	8.09e-05	1.3e-07	4.76e-07	0.003495	0.000133	1e-07	1.5e-05	1.02e-07	6.9e-08	4.74e-06	7.21e-06
H13	5.93e-06	0.000267	4.43e-05	1.13e-06	0.004214	2.01e-07	0.000165	1.19e-07	5.76e-05	1.75e-07	1.22e-06	0.000133	0.003596	1.96e-08	4.57e-05	1.75e-07	9.02e-09	3.62e-05	4.19e-06
H14	5.62e-05	2.73e-06	4.54e-06	0.000181	1.1e-07	0.004288	3.1e-08	0.000263	2.13e-08	1.39e-05	4.55e-05	1e-07	1.96e-08	0.003732	2.7e-09	6.1e-05	3.3e-05	1.24e-09	1.67e-09
H15	1.49e-06	5.27e-05	4.71e-06	1.36e-07	0.000178	3.27e-08	0.004287	2.31e-08	0.000266	3.14e-08	1.05e-07	1.5e-05	4.57e-05	2.7e-09	0.003708	8.41e-09	1.61e-09	6.12e-05	3.3e-05
H16	1.19e-05	8.09e-06	2.23e-05	5.7e-05	6.89e-07	0.000272	5.56e-08	0.004347	6.82e-08	4.44e-06	3.68e-05	1.02e-07	1.75e-07	6.1e-05	8.41e-09	0.003714	0.000152	3.23e-09	3.37e-09
H17	1.4e-05	4.7e-07	3.39e-06	5.69e-05	4.5e-08	0.000274	8.23e-09	0.00438	9.8e-09	7.2e-06	4.02e-06	6.9e-08	9.02e-09	3.3e-05	1.61e-09	0.000152	0.003718	5.97e-10	6.51e-10
H18	5.09e-07	1.14e-05	2.2e-06	3.33e-08	5.73e-05	2.07e-08	0.000274	1.1e-08	0.004353	4.89e-09	2.18e-08	4.74e-06	3.62e-05	1.24e-09	6.12e-05	3.23e-09	5.97e-10	0.003718	0.000152
H19	5.75e-07	9.98e-06	4.31e-06	3.95e-08	5.75e-05	4.01e-08	0.000274	2.35e-08	0.004378	4.79e-09	9.1e-09	7.21e-06	4.19e-06	1.67e-09	3.3e-05	3.37e-09	6.51e-10	0.000152	0.003704
Weighted LDM — diallyl_trisulfide_7_LIDI_matrix (× 0.0385026)
	S1	S2	S3	C4	C5	C6	C7	C8	C9	H10	H11	H12	H13	H14	H15	H16	H17	H18	H19	Total
S1	0.563104	0.002951	0.025	0.02026	0.000236	0.001634	3.79e-05	0.000795	3.01e-05	0.001134	0.001075	3.19e-05	0.000329	0.000224	1.16e-05	4.25e-05	4.84e-05	2e-06	3.44e-05	3.61924
S2	0.002951	0.563278	0.025025	0.000226	0.020277	4.29e-05	0.001566	3.74e-05	0.000897	2.52e-05	0.000341	0.001037	0.001099	6.33e-06	0.000239	2.45e-06	2.16e-06	5.95e-05	5.07e-05
S3	0.025	0.025025	0.561456	0.001462	0.001441	0.000358	0.000571	0.000193	0.000529	0.000189	0.000271	0.000336	0.000169	2e-05	1.93e-05	1.83e-05	9.36e-06	1.44e-05	9.49e-05
C4	0.02026	0.000226	0.001462	0.154517	2.25e-05	0.019853	9.21e-06	0.001443	6.56e-06	0.017917	0.017737	1.85e-06	1.04e-05	0.000758	4.69e-07	0.000244	0.000244	1.91e-07	2.93e-06
C5	0.000236	0.020277	0.001441	2.25e-05	0.15456	2.83e-06	0.019931	2.37e-06	0.001422	4.82e-06	9.82e-06	0.01788	0.017752	5.78e-07	0.000769	1.68e-07	1.42e-07	0.000242	0.000242
C6	0.001634	4.29e-05	0.000358	0.019853	2.83e-06	0.153163	2.01e-06	0.035465	1.24e-06	0.0007	0.000724	4.08e-07	1.31e-06	0.018229	1.32e-07	0.001163	0.001163	3.5e-08	2.36e-07
C7	3.79e-05	0.001566	0.000571	9.21e-06	0.019931	2.01e-06	0.152744	1.64e-06	0.035301	8.54e-07	5.97e-06	0.000734	0.000696	1.39e-07	0.01823	1.7e-07	8.82e-08	0.001164	0.001156
C8	0.000795	3.74e-05	0.000193	0.001443	2.37e-06	0.035465	1.64e-06	0.157094	8.58e-07	0.000245	0.000344	1.74e-07	7.65e-07	0.001132	9.05e-08	0.018615	0.018509	4.17e-08	2.9e-07
C9	3.01e-05	0.000897	0.000529	6.56e-06	0.001422	1.24e-06	0.035301	8.58e-07	0.156942	5.07e-07	4.95e-06	0.00034	0.000239	9.81e-08	0.001118	1e-07	4.66e-08	0.018624	0.018482
H10	0.001134	2.52e-05	0.000189	0.017917	4.82e-06	0.0007	8.54e-07	0.000245	5.07e-07	0.01529	0.000564	7.42e-07	5.17e-06	0.000194	8.35e-08	1.78e-05	0.000154	3.84e-08	7.44e-07
H11	0.001075	0.000341	0.000271	0.017737	9.82e-06	0.000724	5.97e-06	0.000344	4.95e-06	0.000564	0.014861	5.53e-07	2.02e-06	6.36e-05	4.26e-07	3.06e-05	2.01e-05	2.94e-07	4.33e-07
H12	3.19e-05	0.001037	0.000336	1.85e-06	0.01788	4.08e-07	0.000734	1.74e-07	0.00034	7.42e-07	5.53e-07	0.015298	0.000561	1.33e-07	5.89e-05	2.04e-08	2.08e-08	3.06e-05	1.89e-05
H13	0.000329	0.001099	0.000169	1.04e-05	0.017752	1.31e-06	0.000696	7.65e-07	0.000239	5.17e-06	2.02e-06	0.000561	0.014963	4.46e-07	0.000194	3.87e-08	9.26e-08	1.71e-05	0.000156
H14	0.000224	6.33e-06	2e-05	0.000758	5.78e-07	0.018229	1.39e-07	0.001132	9.81e-08	0.000194	6.36e-05	1.33e-07	4.46e-07	0.015766	1.15e-08	0.00014	0.00026	6.83e-09	3.57e-08
H15	1.16e-05	0.000239	1.93e-05	4.69e-07	0.000769	1.32e-07	0.01823	9.05e-08	0.001118	8.35e-08	4.26e-07	5.89e-05	0.000194	1.15e-08	0.015869	7.1e-09	5.28e-09	0.00014	0.000259
H16	4.25e-05	2.45e-06	1.83e-05	0.000244	1.68e-07	0.001163	1.7e-07	0.018615	1e-07	1.78e-05	3.06e-05	2.04e-08	3.87e-08	0.00014	7.1e-09	0.015749	0.000645	2.77e-09	1.43e-08
H17	4.84e-05	2.16e-06	9.36e-06	0.000244	1.42e-07	0.001163	8.82e-08	0.018509	4.66e-08	0.000154	2.01e-05	2.08e-08	9.26e-08	0.00026	5.28e-09	0.000645	0.01581	2.54e-09	1.37e-08
H18	2e-06	5.95e-05	1.44e-05	1.91e-07	0.000242	3.5e-08	0.001164	4.17e-08	0.018624	3.84e-08	2.94e-07	3.06e-05	1.71e-05	6.83e-09	0.00014	2.77e-09	2.54e-09	0.015808	0.000644
H19	3.44e-05	5.07e-05	9.49e-05	2.93e-06	0.000242	2.36e-07	0.001156	2.9e-07	0.018482	7.44e-07	4.33e-07	1.89e-05	0.000156	3.57e-08	0.000259	1.43e-08	1.37e-08	0.000644	0.01579
Weighted LDM — diallyl_trisulfide_8_LIDI_matrix (× 0.00830418)
	S1	S2	S3	C4	C5	C6	C7	C8	C9	H10	H11	H12	H13	H14	H15	H16	H17	H18	H19	Total
S1	0.121243	0.000633	0.005395	0.004365	2.8e-05	0.000354	9.98e-05	0.000173	7.8e-05	0.000236	0.000241	4.3e-06	8.3e-06	4.83e-05	2.6e-05	9.13e-06	1.04e-05	2.96e-06	5.48e-06	0.780592
S2	0.000633	0.12152	0.005428	3.59e-05	0.004381	9.88e-06	0.000319	6.97e-06	0.000179	4.95e-06	3.64e-05	0.000244	0.000224	2.52e-06	5.1e-05	4.38e-07	5.32e-07	1.08e-05	1.26e-05
S3	0.005395	0.005428	0.121171	0.000319	0.000316	7.53e-05	0.000101	4.09e-05	7.87e-05	9.08e-05	2.74e-05	4.94e-05	6.96e-05	2.85e-06	5.27e-06	3.93e-06	1.94e-06	1.9e-05	2.67e-06
C4	0.004365	3.59e-05	0.000319	0.033316	5e-06	0.004282	3.63e-06	0.000311	5.84e-06	0.003844	0.003858	9.39e-07	1.08e-06	0.000163	6.13e-07	5.28e-05	5.27e-05	4.41e-07	4.15e-07
C5	2.8e-05	0.004381	0.000316	5e-06	0.033311	8.86e-07	0.004294	6.51e-07	0.000308	1.14e-06	1.51e-06	0.003851	0.003851	7.82e-08	0.000165	7.48e-08	3.75e-08	5.32e-05	5.21e-05
C6	0.000354	9.88e-06	7.53e-05	0.004282	8.86e-07	0.03303	3.63e-07	0.007648	4.22e-07	0.000156	0.000152	2e-07	2.92e-07	0.003931	8.23e-08	0.000251	0.000251	7.66e-08	3.52e-08
C7	9.98e-05	0.000319	0.000101	3.63e-06	0.004294	3.63e-07	0.032919	3.79e-07	0.007591	1.16e-06	5.22e-07	0.000152	0.000159	6.26e-08	0.00392	1.77e-08	2.61e-08	0.000249	0.00025
C8	0.000173	6.97e-06	4.09e-05	0.000311	6.51e-07	0.007648	3.79e-07	0.033889	5.28e-07	7.52e-05	5.33e-05	1.75e-07	2.08e-07	0.000244	7.63e-08	0.004016	0.003993	4.7e-08	5.39e-08
C9	7.8e-05	0.000179	7.87e-05	5.84e-06	0.000308	4.22e-07	0.007591	5.28e-07	0.03385	1.15e-06	3.28e-07	5.32e-05	7.85e-05	2.25e-08	0.000237	2.71e-08	2.9e-08	0.003989	0.004014
H10	0.000236	4.95e-06	9.08e-05	0.003844	1.14e-06	0.000156	1.16e-06	7.52e-05	1.15e-06	0.003241	0.000123	1.02e-07	2.37e-07	1.36e-05	3.07e-07	6.66e-06	4.37e-06	6.4e-08	9.13e-08
H11	0.000241	3.64e-05	2.74e-05	0.003858	1.51e-06	0.000152	5.22e-07	5.33e-05	3.28e-07	0.000123	0.0033	6.69e-07	1.06e-07	4.19e-05	2.1e-07	3.9e-06	3.37e-05	2.67e-08	2.71e-08
H12	4.3e-06	0.000244	4.94e-05	9.39e-07	0.003851	2e-07	0.000152	1.75e-07	5.32e-05	1.02e-07	6.69e-07	0.003278	0.000122	1.81e-08	4.29e-05	1.68e-08	9.93e-09	3.59e-05	3.86e-06
H13	8.3e-06	0.000224	6.96e-05	1.08e-06	0.003851	2.92e-07	0.000159	2.08e-07	7.85e-05	2.37e-07	1.06e-07	0.000122	0.003298	2.44e-08	1.15e-05	2.18e-08	1.27e-08	4.17e-06	6.54e-06
H14	4.83e-05	2.52e-06	2.85e-06	0.000163	7.82e-08	0.003931	6.26e-08	0.000244	2.25e-08	1.36e-05	4.19e-05	1.81e-08	2.44e-08	0.003399	1.61e-08	3.02e-05	5.62e-05	2.07e-09	3.67e-09
H15	2.6e-05	5.1e-05	5.27e-06	6.13e-07	0.000165	8.23e-08	0.00392	7.63e-08	0.000237	3.07e-07	2.1e-07	4.29e-05	1.15e-05	1.61e-08	0.003392	3.92e-09	9.23e-09	5.58e-05	3e-05
H16	9.13e-06	4.38e-07	3.93e-06	5.28e-05	7.48e-08	0.000251	1.77e-08	0.004016	2.71e-08	6.66e-06	3.9e-06	1.68e-08	2.18e-08	3.02e-05	3.92e-09	0.0034	0.000139	5.4e-09	2.22e-09
H17	1.04e-05	5.32e-07	1.94e-06	5.27e-05	3.75e-08	0.000251	2.61e-08	0.003993	2.9e-08	4.37e-06	3.37e-05	9.93e-09	1.27e-08	5.62e-05	9.23e-09	0.000139	0.003414	2.72e-09	2.48e-09
H18	2.96e-06	1.08e-05	1.9e-05	4.41e-07	5.32e-05	7.66e-08	0.000249	4.7e-08	0.003989	6.4e-08	2.67e-08	3.59e-05	4.17e-06	2.07e-09	5.58e-05	5.4e-09	2.72e-09	0.003417	0.000139
H19	5.48e-06	1.26e-05	2.67e-06	4.15e-07	5.21e-05	3.52e-08	0.00025	5.39e-08	0.004014	9.13e-08	2.71e-08	3.86e-06	6.54e-06	3.67e-09	3e-05	2.22e-09	2.48e-09	0.000139	0.003398
Weighted LDM — diallyl_trisulfide_9_LIDI_matrix (× 0.00766005)
	S1	S2	S3	C4	C5	C6	C7	C8	C9	H10	H11	H12	H13	H14	H15	H16	H17	H18	H19	Total
S1	0.112054	0.000588	0.004978	0.004034	4.79e-05	0.000312	6.89e-06	0.000179	3.28e-06	0.000219	0.000206	6.02e-06	7.21e-05	4.74e-05	3.06e-06	1.18e-05	1.01e-05	3.19e-07	3.56e-07	0.720032
S2	0.000588	0.112025	0.004973	4.72e-05	0.004054	7.62e-06	0.000319	6e-06	0.000162	6.59e-05	6.37e-06	0.000198	0.000224	2.32e-06	2.83e-05	3.97e-07	6.87e-06	7.37e-06	1.16e-05
S3	0.004978	0.004973	0.11162	0.000285	0.000284	0.000114	6.65e-05	0.000106	1.33e-05	3.38e-05	6.65e-05	6.51e-05	4.55e-05	3.85e-06	8.89e-05	2.87e-06	1.91e-05	3.38e-06	1.57e-06
C4	0.004034	4.72e-05	0.000285	0.030749	4.12e-06	0.003965	1.19e-06	0.000283	5.62e-07	0.003531	0.003556	2.97e-07	2e-06	0.000153	1.4e-06	4.81e-05	4.83e-05	7.32e-08	6.2e-08
C5	4.79e-05	0.004054	0.000284	4.12e-06	0.030761	1.85e-06	0.003952	1.31e-06	0.000285	1.83e-06	3.17e-07	0.003554	0.003525	9.37e-08	0.000147	3.85e-08	5.18e-07	4.89e-05	4.85e-05
C6	0.000312	7.62e-06	0.000114	0.003965	1.85e-06	0.030389	2.36e-07	0.007022	1.12e-07	0.000138	0.000146	3.63e-07	1.17e-06	0.003627	2.63e-07	0.000231	0.00023	2.37e-08	1.73e-08
C7	6.89e-06	0.000319	6.65e-05	1.19e-06	0.003952	2.36e-07	0.030431	1.48e-07	0.007078	1.04e-06	2.06e-07	0.000139	0.000144	2.16e-08	0.003596	8.21e-09	1.81e-07	0.000235	0.000233
C8	0.000179	6e-06	0.000106	0.000283	1.31e-06	0.007022	1.48e-07	0.031223	1.18e-07	4.76e-05	6.76e-05	2.28e-07	9.44e-07	0.000222	1.94e-07	0.003705	0.003677	1.58e-08	1.16e-08
C9	3.28e-06	0.000162	1.33e-05	5.62e-07	0.000285	1.12e-07	0.007078	1.18e-07	0.031273	6.31e-07	4.11e-08	4.96e-05	7.06e-05	1.65e-08	0.00022	4.08e-09	1.49e-07	0.003691	0.003706
H10	0.000219	6.59e-05	3.38e-05	0.003531	1.83e-06	0.000138	1.04e-06	4.76e-05	6.31e-07	0.002975	0.000112	1.08e-07	4.29e-07	3.85e-05	7.85e-08	3.41e-06	3.11e-05	2.41e-08	5.52e-08
H11	0.000206	6.37e-06	6.65e-05	0.003556	3.17e-07	0.000146	2.06e-07	6.76e-05	4.11e-08	0.000112	0.003041	3.75e-08	1.18e-07	1.17e-05	3.07e-07	6.08e-06	3.76e-06	1.46e-08	9.89e-09
H12	6.02e-06	0.000198	6.51e-05	2.97e-07	0.003554	3.63e-07	0.000139	2.28e-07	4.96e-05	1.08e-07	3.75e-08	0.00305	0.000111	1.95e-08	3.9e-05	5.24e-09	1.43e-08	3.31e-05	3.74e-06
H13	7.21e-05	0.000224	4.55e-05	2e-06	0.003525	1.17e-06	0.000144	9.44e-07	7.06e-05	4.29e-07	1.18e-07	0.000111	0.002945	8.88e-08	8.23e-06	5.85e-08	7.87e-08	3.42e-06	5.8e-06
H14	4.74e-05	2.32e-06	3.85e-06	0.000153	9.37e-08	0.003627	2.16e-08	0.000222	1.65e-08	3.85e-05	1.17e-05	1.95e-08	8.88e-08	0.003157	5.77e-09	2.79e-05	5.16e-05	1.37e-09	1.53e-09
H15	3.06e-06	2.83e-05	8.89e-05	1.4e-06	0.000147	2.63e-07	0.003596	1.94e-07	0.00022	7.85e-08	3.07e-07	3.9e-05	8.23e-06	5.77e-09	0.003077	4.08e-09	4.66e-08	5.07e-05	2.76e-05
H16	1.18e-05	3.97e-07	2.87e-06	4.81e-05	3.85e-08	0.000231	8.21e-09	0.003705	4.08e-09	3.41e-06	6.08e-06	5.24e-09	5.85e-08	2.79e-05	4.08e-09	0.003144	0.000128	3.53e-10	3.66e-10
H17	1.01e-05	6.87e-06	1.91e-05	4.83e-05	5.18e-07	0.00023	1.81e-07	0.003677	1.49e-07	3.11e-05	3.76e-06	1.43e-08	7.87e-08	5.16e-05	4.66e-08	0.000128	0.003141	5.45e-09	1e-08
H18	3.19e-07	7.37e-06	3.38e-06	7.32e-08	4.89e-05	2.37e-08	0.000235	1.58e-08	0.003691	2.41e-08	1.46e-08	3.31e-05	3.42e-06	1.37e-09	5.07e-05	3.53e-10	5.45e-09	0.003196	0.00013
H19	3.56e-07	1.16e-05	1.57e-06	6.2e-08	4.85e-05	1.73e-08	0.000233	1.16e-08	0.003706	5.52e-08	9.89e-09	3.74e-06	5.8e-06	1.53e-09	2.76e-05	3.66e-10	1e-08	0.00013	0.003148
Weighted LDM — diallyl_trisulfide_10_LIDI_matrix (× 0.0330556)
	S1	S2	S3	C4	C5	C6	C7	C8	C9	H10	H11	H12	H13	H14	H15	H16	H17	H18	H19	Total
S1	0.483726	0.00253	0.021591	0.01744	0.00015	0.001266	3.58e-05	0.00071	2.9e-05	0.000971	0.000892	0.000189	2.05e-05	0.000202	4.96e-06	4.27e-05	5e-05	1.65e-06	1.87e-06	3.10723
S2	0.00253	0.482608	0.021429	0.000113	0.017379	0.000406	0.001408	0.000316	0.000685	1.71e-05	3.31e-05	0.000928	0.000964	0.000107	0.000192	1.21e-05	2.23e-05	4.16e-05	3.64e-05
S3	0.021591	0.021429	0.482401	0.001256	0.001269	0.000399	0.000309	0.00031	0.000165	0.000195	0.000277	0.000251	0.000166	2.09e-05	1.75e-05	7.46e-05	1.06e-05	8.06e-06	1.56e-05
C4	0.01744	0.000113	0.001256	0.132605	2.02e-05	0.017096	3.23e-06	0.001225	2.69e-06	0.01533	0.015328	8.3e-06	3.02e-06	0.000656	3.92e-07	0.000211	0.000208	1.39e-07	2.28e-07
C5	0.00015	0.017379	0.001269	2.02e-05	0.132588	1.5e-05	0.017039	2.39e-05	0.001237	3.8e-06	4.3e-06	0.015278	0.015385	2.59e-06	0.000649	1.76e-06	1.68e-06	0.000209	0.00021
C6	0.001266	0.000406	0.000399	0.017096	1.5e-05	0.131044	1.26e-06	0.03022	8.04e-07	0.000607	0.000635	2.19e-06	4.94e-06	0.015606	3.65e-07	0.000993	0.000997	8.39e-08	4.56e-08
C7	3.58e-05	0.001408	0.000309	3.23e-06	0.017039	1.26e-06	0.131489	1.31e-06	0.030446	8.3e-07	8.48e-07	0.000627	0.000603	4.59e-07	0.01565	2.73e-07	1.32e-07	0.000999	0.000999
C8	0.00071	0.000316	0.00031	0.001225	2.39e-05	0.03022	1.31e-06	0.134739	1.15e-06	0.000212	0.000313	1.81e-06	4.57e-06	0.000944	3.12e-07	0.015879	0.015977	7.36e-08	7.62e-08
C9	2.9e-05	0.000685	0.000165	2.69e-06	0.001237	8.04e-07	0.030446	1.15e-06	0.134882	8.52e-07	5.41e-07	0.000298	0.000211	1.72e-07	0.000973	1.49e-07	1.43e-07	0.015893	0.015984
H10	0.000971	1.71e-05	0.000195	0.01533	3.8e-06	0.000607	8.3e-07	0.000212	8.52e-07	0.013042	0.000484	3.36e-06	2.61e-07	0.000171	9.88e-08	0.000143	1.54e-05	3.97e-08	7.24e-08
H11	0.000892	3.31e-05	0.000277	0.015328	4.3e-06	0.000635	8.48e-07	0.000313	5.41e-07	0.000484	0.013122	6.15e-07	7.99e-07	4.56e-05	1.23e-07	1.66e-05	2.61e-05	3.31e-08	6.36e-08
H12	0.000189	0.000928	0.000251	8.3e-06	0.015278	2.19e-06	0.000627	1.81e-06	0.000298	3.36e-06	6.15e-07	0.012895	0.00049	5.93e-07	5.5e-05	1.78e-07	1.54e-07	1.75e-05	2.66e-05
H13	2.05e-05	0.000964	0.000166	3.02e-06	0.015385	4.94e-06	0.000603	4.57e-06	0.000211	2.61e-07	7.99e-07	0.00049	0.013167	1.58e-06	0.000167	2.11e-07	3.13e-07	0.000133	1.54e-05
H14	0.000202	0.000107	2.09e-05	0.000656	2.59e-06	0.015606	4.59e-07	0.000944	1.72e-07	0.000171	4.56e-05	5.93e-07	1.58e-06	0.013514	2.65e-07	0.000222	0.00012	3.5e-08	9.61e-09
H15	4.96e-06	0.000192	1.75e-05	3.92e-07	0.000649	3.65e-07	0.01565	3.12e-07	0.000973	9.88e-08	1.23e-07	5.5e-05	0.000167	2.65e-07	0.013547	2.2e-08	2.49e-08	0.000224	0.000121
H16	4.27e-05	1.21e-05	7.46e-05	0.000211	1.76e-06	0.000993	2.73e-07	0.015879	1.49e-07	0.000143	1.66e-05	1.78e-07	2.11e-07	0.000222	2.2e-08	0.013592	0.000553	8.8e-09	1.98e-08
H17	5e-05	2.23e-05	1.06e-05	0.000208	1.68e-06	0.000997	1.32e-07	0.015977	1.43e-07	1.54e-05	2.61e-05	1.54e-07	3.13e-07	0.00012	2.49e-08	0.000553	0.013528	7.05e-09	6.65e-09
H18	1.65e-06	4.16e-05	8.06e-06	1.39e-07	0.000209	8.39e-08	0.000999	7.36e-08	0.015893	3.97e-08	3.31e-08	1.75e-05	0.000133	3.5e-08	0.000224	8.8e-09	7.05e-09	0.013582	0.000555
H19	1.87e-06	3.64e-05	1.56e-05	2.28e-07	0.00021	4.56e-08	0.000999	7.62e-08	0.015984	7.24e-08	6.36e-08	2.66e-05	1.54e-05	9.61e-09	0.000121	1.98e-08	6.65e-09	0.000555	0.013536
Weighted LDM — diallyl_trisulfide_11_LIDI_matrix (× 0.0397296)
	S1	S2	S3	C4	C5	C6	C7	C8	C9	H10	H11	H12	H13	H14	H15	H16	H17	H18	H19	Total
S1	0.581394	0.003042	0.025957	0.020957	0.00018	0.001521	4.3e-05	0.000854	3.48e-05	0.001168	0.001073	0.000227	2.46e-05	0.000243	5.97e-06	6.01e-05	5.14e-05	1.98e-06	2.24e-06	3.73461
S2	0.003042	0.580046	0.02576	0.000135	0.020889	0.000488	0.001692	0.000379	0.000824	2.05e-05	3.97e-05	0.001115	0.001159	0.000129	0.00023	2.68e-05	1.45e-05	5e-05	4.38e-05
S3	0.025957	0.02576	0.5798	0.001511	0.001526	0.00048	0.000371	0.000373	0.000198	0.000234	0.000333	0.000301	0.0002	2.53e-05	2.1e-05	1.27e-05	8.97e-05	9.68e-06	1.87e-05
C4	0.020957	0.000135	0.001511	0.159367	2.43e-05	0.020548	3.88e-06	0.001472	3.23e-06	0.018424	0.018421	9.97e-06	3.63e-06	0.000787	4.71e-07	0.000249	0.000254	1.67e-07	2.74e-07
C5	0.00018	0.020889	0.001526	2.43e-05	0.159364	1.81e-05	0.02048	2.88e-05	0.001487	4.56e-06	5.17e-06	0.018364	0.018492	3.11e-06	0.000781	2.02e-06	2.12e-06	0.000251	0.000252
C6	0.001521	0.000488	0.00048	0.020548	1.81e-05	0.157498	1.51e-06	0.036321	9.66e-07	0.00073	0.000763	2.63e-06	5.94e-06	0.018756	4.39e-07	0.001198	0.001194	1.01e-07	5.49e-08
C7	4.3e-05	0.001692	0.000371	3.88e-06	0.02048	1.51e-06	0.158035	1.57e-06	0.036594	9.98e-07	1.02e-06	0.000753	0.000725	5.51e-07	0.01881	1.59e-07	3.28e-07	0.001201	0.001201
C8	0.000854	0.000379	0.000373	0.001472	2.88e-05	0.036321	1.57e-06	0.16194	1.38e-06	0.000255	0.000376	2.17e-06	5.5e-06	0.001135	3.75e-07	0.019203	0.019084	8.84e-08	9.15e-08
C9	3.48e-05	0.000824	0.000198	3.23e-06	0.001487	9.66e-07	0.036594	1.38e-06	0.162119	1.02e-06	6.51e-07	0.000358	0.000255	2.07e-07	0.00117	1.72e-07	1.79e-07	0.019102	0.019213
H10	0.001168	2.05e-05	0.000234	0.018424	4.56e-06	0.00073	9.98e-07	0.000255	1.02e-06	0.015676	0.000582	4.03e-06	3.14e-07	0.000206	1.19e-07	1.85e-05	0.000172	4.78e-08	8.71e-08
H11	0.001073	3.97e-05	0.000333	0.018421	5.17e-06	0.000763	1.02e-06	0.000376	6.51e-07	0.000582	0.015771	7.4e-07	9.6e-07	5.48e-05	1.48e-07	3.13e-05	2e-05	3.97e-08	7.64e-08
H12	0.000227	0.001115	0.000301	9.97e-06	0.018364	2.63e-06	0.000753	2.17e-06	0.000358	4.03e-06	7.4e-07	0.015498	0.000589	7.13e-07	6.61e-05	1.85e-07	2.14e-07	2.1e-05	3.19e-05
H13	2.46e-05	0.001159	0.0002	3.63e-06	0.018492	5.94e-06	0.000725	5.5e-06	0.000255	3.14e-07	9.6e-07	0.000589	0.015826	1.89e-06	0.000201	3.76e-07	2.54e-07	0.00016	1.85e-05
H14	0.000243	0.000129	2.53e-05	0.000787	3.11e-06	0.018756	5.51e-07	0.001135	2.07e-07	0.000206	5.48e-05	7.13e-07	1.89e-06	0.016242	3.18e-07	0.000144	0.000267	4.2e-08	1.15e-08
H15	5.97e-06	0.00023	2.1e-05	4.71e-07	0.000781	4.39e-07	0.01881	3.75e-07	0.00117	1.19e-07	1.48e-07	6.61e-05	0.000201	3.18e-07	0.016282	3e-08	2.65e-08	0.000269	0.000145
H16	6.01e-05	2.68e-05	1.27e-05	0.000249	2.02e-06	0.001198	1.59e-07	0.019203	1.72e-07	1.85e-05	3.13e-05	1.85e-07	3.76e-07	0.000144	3e-08	0.01626	0.000665	8.48e-09	8e-09
H17	5.14e-05	1.45e-05	8.97e-05	0.000254	2.12e-06	0.001194	3.28e-07	0.019084	1.79e-07	0.000172	2e-05	2.14e-07	2.54e-07	0.000267	2.65e-08	0.000665	0.016336	1.06e-08	2.38e-08
H18	1.98e-06	5e-05	9.68e-06	1.67e-07	0.000251	1.01e-07	0.001201	8.84e-08	0.019102	4.78e-08	3.97e-08	2.1e-05	0.00016	4.2e-08	0.000269	8.48e-09	1.06e-08	0.016324	0.000667
H19	2.24e-06	4.38e-05	1.87e-05	2.74e-07	0.000252	5.49e-08	0.001201	9.15e-08	0.019213	8.71e-08	7.64e-08	3.19e-05	1.85e-05	1.15e-08	0.000145	8e-09	2.38e-08	0.000667	0.016269
Weighted LDM — diallyl_trisulfide_12_LIDI_matrix (× 0.0301152)
	S1	S2	S3	C4	C5	C6	C7	C8	C9	H10	H11	H12	H13	H14	H15	H16	H17	H18	H19	Total
S1	0.439644	0.002313	0.019539	0.015941	0.000103	0.001247	0.000369	0.000633	0.000284	0.00078	0.000886	1.57e-05	3.03e-05	0.00011	9.82e-05	2.9e-05	4.53e-05	1.08e-05	1.99e-05	2.83085
S2	0.002313	0.440667	0.019664	0.000146	0.015882	2.62e-05	0.001151	1.17e-05	0.000647	2.26e-05	0.000188	0.000884	0.000813	1.31e-05	0.000184	1.28e-06	1.28e-06	3.89e-05	4.56e-05
S3	0.019539	0.019664	0.439175	0.00113	0.001139	0.000267	0.000365	5.05e-05	0.000284	0.000256	0.000195	0.000176	0.000251	0.000354	1.91e-05	1.34e-05	5.97e-06	6.82e-05	9.68e-06
C4	0.015941	0.000146	0.00113	0.120888	1.74e-05	0.015535	1.21e-05	0.001119	1.98e-05	0.013973	0.013905	3.6e-06	3.66e-06	0.000578	2.1e-06	0.000192	0.000191	1.56e-06	1.38e-06
C5	0.000103	0.015882	0.001139	1.74e-05	0.120804	3.87e-06	0.015575	1.61e-06	0.001117	1.95e-06	7.9e-06	0.013964	0.013962	5.59e-06	0.000597	3.01e-07	1.95e-07	0.000193	0.000189
C6	0.001247	2.62e-05	0.000267	0.015535	3.87e-06	0.119634	4.74e-06	0.027829	4.46e-06	0.000549	0.000573	3.41e-07	1.03e-06	0.014141	1.35e-06	0.000926	0.000917	2.27e-07	3.1e-07
C7	0.000369	0.001151	0.000365	1.21e-05	0.015575	4.74e-06	0.119387	2.84e-06	0.02753	5.13e-07	1.94e-06	0.000553	0.000578	1.06e-06	0.014216	1.29e-07	2.39e-07	0.000904	0.000908
C8	0.000633	1.17e-05	5.05e-05	0.001119	1.61e-06	0.027829	2.84e-06	0.122966	4e-06	0.000197	0.000279	2.6e-07	3.82e-07	0.000867	6.08e-07	0.014514	0.014574	1.7e-07	2.72e-07
C9	0.000284	0.000647	0.000284	1.98e-05	0.001117	4.46e-06	0.02753	4e-06	0.122753	4.33e-07	1.44e-06	0.000194	0.000285	4.91e-07	0.00086	1.94e-07	3.64e-07	0.014465	0.014557
H10	0.00078	2.26e-05	0.000256	0.013973	1.95e-06	0.000549	5.13e-07	0.000197	4.33e-07	0.01202	0.000438	6.64e-07	4.88e-07	0.000154	2.02e-07	0.000131	1.48e-05	1.92e-07	2.92e-08
H11	0.000886	0.000188	0.000195	0.013905	7.9e-06	0.000573	1.94e-06	0.000279	1.44e-06	0.000438	0.011699	3.24e-06	6.08e-07	3.29e-05	6.24e-07	1.35e-05	2.3e-05	1.47e-07	1.22e-07
H12	1.57e-05	0.000884	0.000176	3.6e-06	0.013964	3.41e-07	0.000553	2.6e-07	0.000194	6.64e-07	3.24e-06	0.011877	0.000441	3.04e-07	0.000156	3.45e-08	3.05e-08	0.00013	1.4e-05
H13	3.03e-05	0.000813	0.000251	3.66e-06	0.013962	1.03e-06	0.000578	3.82e-07	0.000285	4.88e-07	6.08e-07	0.000441	0.011946	1.21e-06	4.14e-05	8.7e-08	8.18e-08	1.52e-05	2.37e-05
H14	0.00011	1.31e-05	0.000354	0.000578	5.59e-06	0.014141	1.06e-06	0.000867	4.91e-07	0.000154	3.29e-05	3.04e-07	1.21e-06	0.012122	5.55e-08	0.0002	0.000109	1.42e-07	1.74e-08
H15	9.82e-05	0.000184	1.91e-05	2.1e-06	0.000597	1.35e-06	0.014216	6.08e-07	0.00086	2.02e-07	6.24e-07	0.000156	4.14e-05	5.55e-08	0.012302	2.87e-08	6.22e-08	0.000202	0.000109
H16	2.9e-05	1.28e-06	1.34e-05	0.000192	3.01e-07	0.000926	1.29e-07	0.014514	1.94e-07	0.000131	1.35e-05	3.45e-08	8.7e-08	0.0002	2.87e-08	0.012573	0.000513	1.87e-08	1.15e-08
H17	4.53e-05	1.28e-06	5.97e-06	0.000191	1.95e-07	0.000917	2.39e-07	0.014574	3.64e-07	1.48e-05	2.3e-05	3.05e-08	8.18e-08	0.000109	6.22e-08	0.000513	0.012391	2.16e-08	2.41e-08
H18	1.08e-05	3.89e-05	6.82e-05	1.56e-06	0.000193	2.27e-07	0.000904	1.7e-07	0.014465	1.92e-07	1.47e-07	0.00013	1.52e-05	1.42e-07	0.000202	1.87e-08	2.16e-08	0.012378	0.000504
H19	1.99e-05	4.56e-05	9.68e-06	1.38e-06	0.000189	3.1e-07	0.000908	2.72e-07	0.014557	2.92e-08	1.22e-07	1.4e-05	2.37e-05	1.74e-08	0.000109	1.15e-08	2.41e-08	0.000504	0.012326
Weighted LDM — diallyl_trisulfide_13_LIDI_matrix (× 0.0301152)
	S1	S2	S3	C4	C5	C6	C7	C8	C9	H10	H11	H12	H13	H14	H15	H16	H17	H18	H19	Total
S1	0.439644	0.002316	0.019535	0.015946	0.000103	0.001247	0.000369	0.000633	0.000284	0.000887	0.00078	1.57e-05	3.03e-05	0.00011	9.82e-05	2.9e-05	4.54e-05	1.99e-05	1.08e-05	2.83088
S2	0.002316	0.440673	0.019668	0.000146	0.015888	2.62e-05	0.001154	1.17e-05	0.000648	0.000188	2.26e-05	0.000885	0.000813	1.31e-05	0.000184	1.28e-06	1.28e-06	4.56e-05	3.9e-05
S3	0.019535	0.019668	0.439172	0.001131	0.001139	0.000267	0.000365	5.05e-05	0.000284	0.000196	0.000256	0.000176	0.000251	0.000354	1.91e-05	1.34e-05	5.97e-06	9.68e-06	6.82e-05
C4	0.015946	0.000146	0.001131	0.120891	1.74e-05	0.015535	1.21e-05	0.001119	1.98e-05	0.013907	0.013971	3.6e-06	3.66e-06	0.000578	2.11e-06	0.000192	0.000191	1.38e-06	1.56e-06
C5	0.000103	0.015888	0.001139	1.74e-05	0.120808	3.86e-06	0.015576	1.61e-06	0.001116	7.91e-06	1.95e-06	0.013964	0.013962	5.59e-06	0.000597	3.01e-07	1.95e-07	0.000189	0.000193
C6	0.001247	2.62e-05	0.000267	0.015535	3.86e-06	0.119629	4.75e-06	0.027827	4.46e-06	0.000573	0.000548	3.4e-07	1.03e-06	0.014141	1.35e-06	0.000925	0.000917	3.1e-07	2.26e-07
C7	0.000369	0.001154	0.000365	1.21e-05	0.015576	4.75e-06	0.11939	2.85e-06	0.027531	1.94e-06	5.13e-07	0.000553	0.000578	1.06e-06	0.014216	1.29e-07	2.39e-07	0.000908	0.000905
C8	0.000633	1.17e-05	5.05e-05	0.001119	1.61e-06	0.027827	2.85e-06	0.122965	4e-06	0.000279	0.000196	2.6e-07	3.82e-07	0.000868	6.08e-07	0.014513	0.014574	2.72e-07	1.7e-07
C9	0.000284	0.000648	0.000284	1.98e-05	0.001116	4.46e-06	0.027531	4e-06	0.122749	1.44e-06	4.32e-07	0.000193	0.000285	4.89e-07	0.00086	1.94e-07	3.64e-07	0.014557	0.014464
H10	0.000887	0.000188	0.000196	0.013907	7.91e-06	0.000573	1.94e-06	0.000279	1.44e-06	0.011699	0.000438	3.24e-06	6.08e-07	3.29e-05	6.24e-07	1.35e-05	2.3e-05	1.22e-07	1.47e-07
H11	0.00078	2.26e-05	0.000256	0.013971	1.95e-06	0.000548	5.13e-07	0.000196	4.32e-07	0.000438	0.01202	6.64e-07	4.88e-07	0.000154	2.02e-07	0.000131	1.48e-05	2.92e-08	1.92e-07
H12	1.57e-05	0.000885	0.000176	3.6e-06	0.013964	3.4e-07	0.000553	2.6e-07	0.000193	3.24e-06	6.64e-07	0.011877	0.000441	3.04e-07	0.000156	3.45e-08	3.05e-08	1.4e-05	0.00013
H13	3.03e-05	0.000813	0.000251	3.66e-06	0.013962	1.03e-06	0.000578	3.82e-07	0.000285	6.08e-07	4.88e-07	0.000441	0.011946	1.21e-06	4.14e-05	8.7e-08	8.18e-08	2.37e-05	1.52e-05
H14	0.00011	1.31e-05	0.000354	0.000578	5.59e-06	0.014141	1.06e-06	0.000868	4.89e-07	3.29e-05	0.000154	3.04e-07	1.21e-06	0.012122	5.55e-08	0.0002	0.000109	1.74e-08	1.42e-07
H15	9.82e-05	0.000184	1.91e-05	2.11e-06	0.000597	1.35e-06	0.014216	6.08e-07	0.00086	6.24e-07	2.02e-07	0.000156	4.14e-05	5.55e-08	0.012302	2.87e-08	6.22e-08	0.000109	0.000202
H16	2.9e-05	1.28e-06	1.34e-05	0.000192	3.01e-07	0.000925	1.29e-07	0.014513	1.94e-07	1.35e-05	0.000131	3.45e-08	8.7e-08	0.0002	2.87e-08	0.012573	0.000513	1.15e-08	1.87e-08
H17	4.54e-05	1.28e-06	5.97e-06	0.000191	1.95e-07	0.000917	2.39e-07	0.014574	3.64e-07	2.3e-05	1.48e-05	3.05e-08	8.18e-08	0.000109	6.22e-08	0.000513	0.012391	2.41e-08	2.16e-08
H18	1.99e-05	4.56e-05	9.68e-06	1.38e-06	0.000189	3.1e-07	0.000908	2.72e-07	0.014557	1.22e-07	2.92e-08	1.4e-05	2.37e-05	1.74e-08	0.000109	1.15e-08	2.41e-08	0.012326	0.000504
H19	1.08e-05	3.9e-05	6.82e-05	1.56e-06	0.000193	2.26e-07	0.000905	1.7e-07	0.014464	1.47e-07	1.92e-07	0.00013	1.52e-05	1.42e-07	0.000202	1.87e-08	2.16e-08	0.000504	0.012378
Weighted LDM — diallyl_trisulfide_14_LIDI_matrix (× 0.00519111)
	S1	S2	S3	C4	C5	C6	C7	C8	C9	H10	H11	H12	H13	H14	H15	H16	H17	H18	H19	Total
S1	0.075784	0.000391	0.003389	0.002745	1.72e-05	0.000215	6.15e-05	0.000109	4.98e-05	0.000135	0.000152	5.2e-06	2.6e-06	1.59e-05	1.49e-05	7.63e-06	5.14e-06	1.89e-06	3.47e-06	0.487963
S2	0.000391	0.075917	0.003386	1.67e-05	0.002737	3.16e-05	0.0002	6.6e-06	0.000112	6.2e-06	2.83e-06	0.00014	0.000152	5.55e-05	3.21e-05	5.7e-07	1.23e-06	6.75e-06	7.84e-06
S3	0.003389	0.003386	0.075721	0.000198	0.000197	2.8e-05	6.27e-05	9.18e-06	4.83e-05	3.96e-05	5.55e-05	4.35e-05	3.15e-05	2.46e-05	3.21e-06	1.04e-06	1.63e-06	1.18e-05	1.68e-06
C4	0.002745	1.67e-05	0.000198	0.020834	3.17e-06	0.002678	2.48e-06	0.000193	3.93e-06	0.002409	0.0024	8.26e-07	4.89e-07	9.94e-05	3.9e-07	3.29e-05	3.34e-05	2.77e-07	2.64e-07
C5	1.72e-05	0.002737	0.000197	3.17e-06	0.020824	1.08e-06	0.002684	4.2e-07	0.000192	8.24e-07	7.59e-07	0.002407	0.002407	2.81e-06	0.000103	2.41e-08	7.18e-08	3.32e-05	3.26e-05
C6	0.000215	3.16e-05	2.8e-05	0.002678	1.08e-06	0.020618	4.12e-07	0.004794	3.17e-07	9.56e-05	9.9e-05	8.95e-08	4.28e-07	0.002433	2.58e-07	0.000158	0.00016	2.77e-08	2.8e-08
C7	6.15e-05	0.0002	6.27e-05	2.48e-06	0.002684	4.12e-07	0.020583	1.44e-07	0.004746	1.63e-07	7.57e-07	9.95e-05	9.52e-05	3.2e-07	0.002449	9.07e-09	1.21e-08	0.000156	0.000157
C8	0.000109	6.6e-06	9.18e-06	0.000193	4.2e-07	0.004794	1.44e-07	0.021201	2.8e-07	3.42e-05	4.81e-05	4e-08	1.41e-07	0.000149	6.59e-08	0.002512	0.002502	1.63e-08	3.05e-08
C9	4.98e-05	0.000112	4.83e-05	3.93e-06	0.000192	3.17e-07	0.004746	2.8e-07	0.021163	1.75e-07	7.23e-07	4.9e-05	3.32e-05	2.36e-07	0.000148	1.49e-08	1.79e-08	0.002494	0.002509
H10	0.000135	6.2e-06	3.96e-05	0.002409	8.24e-07	9.56e-05	1.63e-07	3.42e-05	1.75e-07	0.002074	7.48e-05	2.34e-07	1.19e-07	2.62e-05	2.61e-08	2.56e-06	2.3e-05	4.23e-08	8.12e-09
H11	0.000152	2.83e-06	5.55e-05	0.0024	7.59e-07	9.9e-05	7.57e-07	4.81e-05	7.23e-07	7.48e-05	0.002015	1.55e-07	5.79e-08	6.04e-06	2.17e-07	4e-06	2.35e-06	3.83e-08	5.46e-08
H12	5.2e-06	0.00014	4.35e-05	8.26e-07	0.002407	8.95e-08	9.95e-05	4e-08	4.9e-05	2.34e-07	1.55e-07	0.002059	7.59e-05	6.82e-08	7.1e-06	3.24e-09	8.28e-09	2.6e-06	4.08e-06
H13	2.6e-06	0.000152	3.15e-05	4.89e-07	0.002407	4.28e-07	9.52e-05	1.41e-07	3.32e-05	1.19e-07	5.79e-08	7.59e-05	0.002047	9.07e-07	2.68e-05	1.21e-08	2.32e-08	2.24e-05	2.41e-06
H14	1.59e-05	5.55e-05	2.46e-05	9.94e-05	2.81e-06	0.002433	3.2e-07	0.000149	2.36e-07	2.62e-05	6.04e-06	6.82e-08	9.07e-07	0.002081	9.76e-08	1.87e-05	3.43e-05	2.33e-08	1.5e-08
H15	1.49e-05	3.21e-05	3.21e-06	3.9e-07	0.000103	2.58e-07	0.002449	6.59e-08	0.000148	2.61e-08	2.17e-07	7.1e-06	2.68e-05	9.76e-08	0.002114	3.96e-09	3.09e-09	3.48e-05	1.87e-05
H16	7.63e-06	5.7e-07	1.04e-06	3.29e-05	2.41e-08	0.000158	9.07e-09	0.002512	1.49e-08	2.56e-06	4e-06	3.24e-09	1.21e-08	1.87e-05	3.96e-09	0.002136	8.84e-05	1.24e-09	1.93e-09
H17	5.14e-06	1.23e-06	1.63e-06	3.34e-05	7.18e-08	0.00016	1.21e-08	0.002502	1.79e-08	2.3e-05	2.35e-06	8.28e-09	2.32e-08	3.43e-05	3.09e-09	8.84e-05	0.002168	1.89e-09	1.37e-09
H18	1.89e-06	6.75e-06	1.18e-05	2.77e-07	3.32e-05	2.77e-08	0.000156	1.63e-08	0.002494	4.23e-08	3.83e-08	2.6e-06	2.24e-05	2.33e-08	3.48e-05	1.24e-09	1.89e-09	0.002135	8.69e-05
H19	3.47e-06	7.84e-06	1.68e-06	2.64e-07	3.26e-05	2.8e-08	0.000157	3.05e-08	0.002509	8.12e-09	5.46e-08	4.08e-06	2.41e-06	1.5e-08	1.87e-05	1.93e-09	1.37e-09	8.69e-05	0.002124
Weighted LDM — diallyl_trisulfide_15_LIDI_matrix (× 0.006196)
	S1	S2	S3	C4	C5	C6	C7	C8	C9	H10	H11	H12	H13	H14	H15	H16	H17	H18	H19	Total
S1	0.090613	0.000466	0.004041	0.003267	1.99e-05	0.000239	3.77e-05	0.000133	7.88e-06	0.000167	0.000181	3.37e-06	7.4e-06	3.83e-05	6.62e-05	9.36e-06	8.06e-06	1.47e-06	6.8e-07	0.582422
S2	0.000466	0.090454	0.004045	2.05e-05	0.003276	7.34e-05	0.000256	5.94e-05	0.00013	6.21e-06	3.1e-06	0.000182	0.000161	1.78e-05	1.9e-05	4.14e-06	2.26e-06	6.14e-06	9.1e-06
S3	0.004041	0.004045	0.090379	0.000235	0.000237	7.48e-05	3.34e-05	5.77e-05	1.1e-05	5.19e-05	3.76e-05	6.63e-05	4.73e-05	3.84e-06	2.94e-05	2.01e-06	1.4e-05	1.95e-06	1.25e-06
C4	0.003267	2.05e-05	0.000235	0.024855	3.79e-06	0.003204	1.29e-06	0.00023	5.01e-07	0.002872	0.002873	9.06e-07	9.84e-07	0.000122	3.36e-06	3.89e-05	3.96e-05	8.57e-08	2.87e-08
C5	1.99e-05	0.003276	0.000237	3.79e-06	0.024867	2.96e-06	0.003197	4.7e-06	0.000231	9.86e-07	5.83e-07	0.002864	0.002876	4.65e-07	0.000119	3.15e-07	3.3e-07	3.98e-05	3.93e-05
C6	0.000239	7.34e-05	7.48e-05	0.003204	2.96e-06	0.024568	4.91e-07	0.005665	1.71e-07	0.000119	0.000114	9.04e-07	1.95e-07	0.002924	3.82e-07	0.000187	0.000186	1.44e-08	1.08e-08
C7	3.77e-05	0.000256	3.34e-05	1.29e-06	0.003197	4.91e-07	0.024609	3.78e-07	0.005721	1.07e-07	5.11e-07	0.000118	0.000114	3.08e-07	0.002904	3.34e-08	3.3e-08	0.000191	0.000188
C8	0.000133	5.94e-05	5.77e-05	0.00023	4.7e-06	0.005665	3.78e-07	0.02526	3.34e-07	5.85e-05	3.97e-05	8.63e-07	2.09e-07	0.000177	2.82e-07	0.002995	0.002977	2.13e-08	1.78e-08
C9	7.88e-06	0.00013	1.1e-05	5.01e-07	0.000231	1.71e-07	0.005721	3.34e-07	0.025305	4.78e-08	1.68e-07	5.74e-05	4.08e-05	7.86e-08	0.000178	3.64e-08	1.94e-08	0.002986	0.002999
H10	0.000167	6.21e-06	5.19e-05	0.002872	9.86e-07	0.000119	1.07e-07	5.85e-05	4.78e-08	0.002457	9.06e-05	1.85e-07	2.79e-07	8.47e-06	8.14e-08	4.88e-06	3.1e-06	9.88e-09	3.87e-09
H11	0.000181	3.1e-06	3.76e-05	0.002873	5.83e-07	0.000114	5.11e-07	3.97e-05	1.68e-07	9.06e-05	0.002443	6.91e-08	1.42e-07	3.2e-05	1.08e-06	2.88e-06	2.67e-05	2.77e-08	1.45e-08
H12	3.37e-06	0.000182	6.63e-05	9.06e-07	0.002864	9.04e-07	0.000118	8.63e-07	5.74e-05	1.85e-07	6.91e-08	0.002405	8.93e-05	2.59e-07	7.21e-06	6.52e-08	4.57e-08	2.8e-06	4.78e-06
H13	7.4e-06	0.000161	4.73e-05	9.84e-07	0.002876	1.95e-07	0.000114	2.09e-07	4.08e-05	2.79e-07	1.42e-07	8.93e-05	0.002475	3.11e-08	3.13e-05	9.69e-09	5.05e-08	2.75e-05	3.06e-06
H14	3.83e-05	1.78e-05	3.84e-06	0.000122	4.65e-07	0.002924	3.08e-07	0.000177	7.86e-08	8.47e-06	3.2e-05	2.59e-07	3.11e-08	0.002523	1.17e-07	2.24e-05	4.16e-05	3.69e-09	4.72e-09
H15	6.62e-05	1.9e-05	2.94e-05	3.36e-06	0.000119	3.82e-07	0.002904	2.82e-07	0.000178	8.14e-08	1.08e-06	7.21e-06	3.13e-05	1.17e-07	0.002484	1.79e-08	2.78e-08	4.09e-05	2.23e-05
H16	9.36e-06	4.14e-06	2.01e-06	3.89e-05	3.15e-07	0.000187	3.34e-08	0.002995	3.64e-08	4.88e-06	2.88e-06	6.52e-08	9.69e-09	2.24e-05	1.79e-08	0.002535	0.000104	1.63e-09	2.3e-09
H17	8.06e-06	2.26e-06	1.4e-05	3.96e-05	3.3e-07	0.000186	3.3e-08	0.002977	1.94e-08	3.1e-06	2.67e-05	4.57e-08	5.05e-08	4.16e-05	2.78e-08	0.000104	0.002548	2.25e-09	1.48e-09
H18	1.47e-06	6.14e-06	1.95e-06	8.57e-08	3.98e-05	1.44e-08	0.000191	2.13e-08	0.002986	9.88e-09	2.77e-08	2.8e-06	2.75e-05	3.69e-09	4.09e-05	1.63e-09	2.25e-09	0.002587	0.000106
H19	6.8e-07	9.1e-06	1.25e-06	2.87e-08	3.93e-05	1.08e-08	0.000188	1.78e-08	0.002999	3.87e-09	1.45e-08	4.78e-06	3.06e-06	4.72e-09	2.23e-05	2.3e-09	1.48e-09	0.000106	0.002549
Weighted LDM — diallyl_trisulfide_16_LIDI_matrix (× 0.232873)
	S1	S2	S3	C4	C5	C6	C7	C8	C9	H10	H11	H12	H13	H14	H15	H16	H17	H18	H19	Total
S1	3.40546	0.017787	0.152059	0.123646	0.000803	0.009066	0.000328	0.004648	0.000259	0.006425	0.00673	0.000172	0.000241	0.001599	4.97e-05	0.000353	0.000291	1.38e-05	1.86e-05	21.89
S2	0.017787	3.40164	0.153581	0.000949	0.122348	0.000449	0.010325	0.000354	0.004938	0.000327	0.000158	0.006469	0.00656	0.000112	0.001476	8.81e-05	3.91e-05	0.000295	0.000261
S3	0.152059	0.153581	3.39877	0.008694	0.00846	0.001912	0.00193	0.001171	0.001124	0.001876	0.001658	0.002557	0.000495	0.000115	7.23e-05	5.37e-05	0.000274	5.32e-05	0.00011
C4	0.123646	0.000949	0.008694	0.934584	0.000168	0.120518	1.88e-05	0.008569	1.27e-05	0.107602	0.10788	4.27e-05	0.000101	0.004582	3.99e-06	0.001465	0.001488	1.51e-06	1.41e-06
C5	0.000803	0.122348	0.00846	0.000168	0.934536	0.0013	0.120092	0.001925	0.008733	3.38e-05	1.82e-05	0.107182	0.106633	0.000115	0.004555	0.000231	8.33e-05	0.001492	0.001476
C6	0.009066	0.000449	0.001912	0.120518	0.0013	0.923627	0.000127	0.212249	3.4e-05	0.004584	0.004293	0.000396	0.001975	0.109938	3.47e-05	0.007009	0.006977	7.45e-06	2.8e-06
C7	0.000328	0.010325	0.00193	1.88e-05	0.120092	0.000127	0.926196	0.000163	0.214266	5.63e-06	2.48e-06	0.004297	0.004111	1.18e-05	0.110184	1.74e-05	6.41e-06	0.007048	0.007014
C8	0.004648	0.000354	0.001171	0.008569	0.001925	0.212249	0.000163	0.94904	4.29e-05	0.002331	0.001501	0.00098	0.002446	0.006741	3.19e-05	0.112365	0.111815	1.05e-05	4.27e-06
C9	0.000259	0.004938	0.001124	1.27e-05	0.008733	3.4e-05	0.214266	4.29e-05	0.950678	3.27e-06	1.85e-06	0.002126	0.001483	4.18e-06	0.006802	8.75e-06	6.63e-06	0.112022	0.11261
H10	0.006425	0.000327	0.001876	0.107602	3.38e-05	0.004584	5.63e-06	0.002331	3.27e-06	0.091597	0.003385	1.36e-05	3.31e-05	0.000287	1.8e-06	0.000185	0.000114	3.72e-07	2.05e-07
H11	0.00673	0.000158	0.001658	0.10788	1.82e-05	0.004293	2.48e-06	0.001501	1.85e-06	0.003385	0.091652	7.81e-06	1.15e-05	0.001212	2.63e-07	0.000109	0.001014	2.27e-07	1.26e-07
H12	0.000172	0.006469	0.002557	4.27e-05	0.107182	0.000396	0.004297	0.00098	0.002126	1.36e-05	7.81e-06	0.090184	0.003364	2.06e-05	0.000376	5.29e-05	0.000151	0.000124	0.000185
H13	0.000241	0.00656	0.000495	0.000101	0.106633	0.001975	0.004111	0.002446	0.001483	3.31e-05	1.15e-05	0.003364	0.089942	0.000289	0.001118	0.000449	6.16e-05	0.000949	0.000107
H14	0.001599	0.000112	0.000115	0.004582	0.000115	0.109938	1.18e-05	0.006741	4.18e-06	0.000287	0.001212	2.06e-05	0.000289	0.09543	6.46e-06	0.000846	0.001579	2.9e-06	3.27e-07
H15	4.97e-05	0.001476	7.23e-05	3.99e-06	0.004555	3.47e-05	0.110184	3.19e-05	0.006802	1.8e-06	2.63e-07	0.000376	0.001118	6.46e-06	0.095102	6.31e-06	9.52e-07	0.001576	0.000842
H16	0.000353	8.81e-05	5.37e-05	0.001465	0.000231	0.007009	1.74e-05	0.112365	8.75e-06	0.000185	0.000109	5.29e-05	0.000449	0.000846	6.31e-06	0.095522	0.003908	7.77e-06	7.19e-07
H17	0.000291	3.91e-05	0.000274	0.001488	8.33e-05	0.006977	6.41e-06	0.111815	6.63e-06	0.000114	0.001014	0.000151	6.16e-05	0.001579	9.52e-07	0.003908	0.095689	6.98e-07	4.31e-07
H18	1.38e-05	0.000295	5.32e-05	1.51e-06	0.001492	7.45e-06	0.007048	1.05e-05	0.112022	3.72e-07	2.27e-07	0.000124	0.000949	2.9e-06	0.001576	7.77e-06	6.98e-07	0.096046	0.003916
H19	1.86e-05	0.000261	0.00011	1.41e-06	0.001476	2.8e-06	0.007014	4.27e-06	0.11261	2.05e-07	1.26e-07	0.000185	0.000107	3.27e-07	0.000842	7.19e-07	4.31e-07	0.003916	0.095262
Weighted LDM — diallyl_trisulfide_17_LIDI_matrix (× 0.0045248)
	S1	S2	S3	C4	C5	C6	C7	C8	C9	H10	H11	H12	H13	H14	H15	H16	H17	H18	H19	Total
S1	0.066165	0.000358	0.00296	0.00239	1.54e-05	0.000172	4.69e-06	9.44e-05	1.21e-06	0.000131	0.000123	3.62e-06	5.86e-06	3.27e-05	4.27e-06	7.01e-06	5.32e-06	2.81e-07	2.13e-07	0.425331
S2	0.000358	0.066142	0.002958	1.59e-05	0.002396	4.98e-06	0.000183	2.65e-06	9.35e-05	6.41e-06	4.3e-06	0.000116	0.000135	9.8e-07	1.49e-05	1.32e-07	2.09e-06	4.22e-06	6.92e-06
S3	0.00296	0.002958	0.065908	0.000166	0.000165	8.43e-05	4.59e-05	4.54e-05	7.89e-06	1.12e-05	3.78e-05	3.75e-05	1.83e-05	5.08e-06	5.73e-05	1.5e-06	2.12e-06	2.08e-06	9.01e-07
C4	0.00239	1.59e-05	0.000166	0.018153	8.81e-06	0.002339	9.62e-07	0.000167	6.09e-07	0.002094	0.002092	8.62e-07	1.84e-05	8.89e-05	1.06e-06	2.84e-05	2.72e-05	5.98e-08	5.78e-08
C5	1.54e-05	0.002396	0.000165	8.81e-06	0.018138	2.59e-06	0.00233	7.43e-06	0.000169	1.54e-05	8.73e-07	0.002098	0.002079	4.03e-07	8.46e-05	5.1e-07	1.23e-05	2.88e-05	2.87e-05
C6	0.000172	4.98e-06	8.43e-05	0.002339	2.59e-06	0.017934	5.1e-06	0.004137	8.99e-07	8.38e-05	8.73e-05	1.49e-07	3.86e-06	0.002135	1.19e-05	0.000136	0.000134	2.01e-07	7.58e-08
C7	4.69e-06	0.000183	4.59e-05	9.62e-07	0.00233	5.1e-06	0.017981	2.23e-05	0.004176	1.14e-06	2.77e-07	8.17e-05	8.64e-05	4.25e-07	0.0021	8.45e-07	1.77e-05	0.000139	0.000137
C8	9.44e-05	2.65e-06	4.54e-05	0.000167	7.43e-06	0.004137	2.23e-05	0.018442	2.97e-06	2.8e-05	4.44e-05	6.42e-07	1.34e-05	0.00013	3.18e-05	0.002186	0.002155	5.57e-07	1.94e-07
C9	1.21e-06	9.35e-05	7.89e-06	6.09e-07	0.000169	8.99e-07	0.004176	2.97e-06	0.018473	1.22e-06	1.81e-07	2.94e-05	4.3e-05	7.32e-08	0.000127	1.29e-07	5.44e-06	0.00218	0.002189
H10	0.000131	6.41e-06	1.12e-05	0.002094	1.54e-05	8.38e-05	1.14e-06	2.8e-05	1.22e-06	0.001814	6.65e-05	9.87e-07	3.02e-05	2.33e-05	8.43e-08	1.98e-06	1.76e-05	4.96e-08	9.43e-08
H11	0.000123	4.3e-06	3.78e-05	0.002092	8.73e-07	8.73e-05	2.77e-07	4.44e-05	1.81e-07	6.65e-05	0.001779	5.92e-08	1.48e-06	5.77e-06	3.85e-07	3.45e-06	2.17e-06	1.2e-08	9.35e-09
H12	3.62e-06	0.000116	3.75e-05	8.62e-07	0.002098	1.49e-07	8.17e-05	6.42e-07	2.94e-05	9.87e-07	5.92e-08	0.001799	6.61e-05	3.52e-08	2.26e-05	6.36e-08	6.61e-07	1.94e-05	2.22e-06
H13	5.86e-06	0.000135	1.83e-05	1.84e-05	0.002079	3.86e-06	8.64e-05	1.34e-05	4.3e-05	3.02e-05	1.48e-06	6.61e-05	0.001791	9.74e-07	4.47e-06	1.11e-06	1.92e-05	2.01e-06	3.42e-06
H14	3.27e-05	9.8e-07	5.08e-06	8.89e-05	4.03e-07	0.002135	4.25e-07	0.00013	7.32e-08	2.33e-05	5.77e-06	3.52e-08	9.74e-07	0.001842	3.58e-07	1.64e-05	2.98e-05	1.1e-08	6.78e-09
H15	4.27e-06	1.49e-05	5.73e-05	1.06e-06	8.46e-05	1.19e-05	0.0021	3.18e-05	0.000127	8.43e-08	3.85e-07	2.26e-05	4.47e-06	3.58e-07	0.001769	1.92e-06	8.35e-06	2.9e-05	1.6e-05
H16	7.01e-06	1.32e-07	1.5e-06	2.84e-05	5.1e-07	0.000136	8.45e-07	0.002186	1.29e-07	1.98e-06	3.45e-06	6.36e-08	1.11e-06	1.64e-05	1.92e-06	0.001847	7.5e-05	2.24e-08	1.16e-08
H17	5.32e-06	2.09e-06	2.12e-06	2.72e-05	1.23e-05	0.000134	1.77e-05	0.002155	5.44e-06	1.76e-05	2.17e-06	6.61e-07	1.92e-05	2.98e-05	8.35e-06	7.5e-05	0.001849	2.37e-07	1.76e-07
H18	2.81e-07	4.22e-06	2.08e-06	5.98e-08	2.88e-05	2.01e-07	0.000139	5.57e-07	0.00218	4.96e-08	1.2e-08	1.94e-05	2.01e-06	1.1e-08	2.9e-05	2.24e-08	2.37e-07	0.001884	7.68e-05
H19	2.13e-07	6.92e-06	9.01e-07	5.78e-08	2.87e-05	7.58e-08	0.000137	1.94e-07	0.002189	9.43e-08	9.35e-09	2.22e-06	3.42e-06	6.78e-09	1.6e-05	1.16e-08	1.76e-07	7.68e-05	0.001858
Weighted LDM — diallyl_trisulfide_18_LIDI_matrix (× 0.028523)
	S1	S2	S3	C4	C5	C6	C7	C8	C9	H10	H11	H12	H13	H14	H15	H16	H17	H18	H19	Total
S1	0.416848	0.00221	0.018771	0.01495	0.000108	0.00125	0.000101	0.000599	5.84e-05	0.000823	0.000724	3.66e-05	1.8e-05	0.00019	3.09e-05	3.54e-05	3.42e-05	6e-06	5.62e-06	2.68115
S2	0.00221	0.416938	0.01867	0.000107	0.015183	2.27e-05	0.001097	1.4e-05	0.000525	3.33e-05	2.89e-05	0.000786	0.000822	9.84e-06	0.000214	1.31e-06	1.29e-06	3.47e-05	4.2e-05
S3	0.018771	0.01867	0.416182	0.001043	0.001077	0.000183	0.000206	0.000113	0.000101	7.62e-05	0.000406	0.000235	0.000201	9.28e-06	1.5e-05	1.24e-05	6.12e-06	2.16e-05	5.27e-06
C4	0.01495	0.000107	0.001043	0.114753	1.88e-05	0.014729	0.000132	0.001066	0.000216	0.013319	0.012829	4.18e-06	2.13e-06	0.000545	7.73e-06	0.000182	0.000182	1.14e-05	1.35e-05
C5	0.000108	0.015183	0.001077	1.88e-05	0.114545	5.83e-06	0.014739	2.41e-06	0.001047	1.49e-06	1.47e-05	0.013162	0.013214	7.39e-06	0.000556	2.51e-07	1.95e-07	0.000182	0.000178
C6	0.00125	2.27e-05	0.000183	0.014729	5.83e-06	0.113271	7.21e-05	0.026236	0.000117	0.000542	0.000504	1.2e-06	6.66e-07	0.013364	3.29e-05	0.000863	0.000866	4.08e-06	8e-05
C7	0.000101	0.001097	0.000206	0.000132	0.014739	7.21e-05	0.113155	7.08e-06	0.025949	1.04e-05	0.000232	0.000565	0.000525	0.000123	0.013425	7.65e-07	2.57e-06	0.000859	0.000848
C8	0.000599	1.4e-05	0.000113	0.001066	2.41e-06	0.026236	7.08e-06	0.116553	1.93e-05	0.000184	0.000273	3.99e-07	2.96e-07	0.000815	3.7e-06	0.013805	0.01373	2.16e-06	2.46e-05
C9	5.84e-05	0.000525	0.000101	0.000216	0.001047	0.000117	0.025949	1.93e-05	0.116296	1.17e-05	0.000438	0.000299	0.000184	0.000112	0.000815	1.24e-06	2.54e-06	0.013692	0.01371
H10	0.000823	3.33e-05	7.62e-05	0.013319	1.49e-06	0.000542	1.04e-05	0.000184	1.17e-05	0.011462	0.000392	5.56e-07	1.46e-07	0.000149	1.95e-06	1.35e-05	0.000122	4.12e-07	9.64e-07
H11	0.000724	2.89e-05	0.000406	0.012829	1.47e-05	0.000504	0.000232	0.000273	0.000438	0.000392	0.010338	5.8e-06	2.01e-06	3.74e-05	5.91e-06	2.09e-05	1.35e-05	4e-05	2.26e-05
H12	3.66e-05	0.000786	0.000235	4.18e-06	0.013162	1.2e-06	0.000565	3.99e-07	0.000299	5.56e-07	5.8e-06	0.011183	0.000413	1e-06	3.05e-05	4.1e-08	5.45e-08	1.42e-05	2.2e-05
H13	1.8e-05	0.000822	0.000201	2.13e-06	0.013214	6.66e-07	0.000525	2.96e-07	0.000184	1.46e-07	2.01e-06	0.000413	0.011218	2.1e-06	0.000147	1.7e-08	3.39e-08	0.000123	1.34e-05
H14	0.00019	9.84e-06	9.28e-06	0.000545	7.39e-06	0.013364	0.000123	0.000815	0.000112	0.000149	3.74e-05	1e-06	2.1e-06	0.01155	7.09e-05	0.000102	0.000189	5.29e-06	5.33e-05
H15	3.09e-05	0.000214	1.5e-05	7.73e-06	0.000556	3.29e-05	0.013425	3.7e-06	0.000815	1.95e-06	5.91e-06	3.05e-05	0.000147	7.09e-05	0.011601	5.79e-07	2.05e-06	0.000193	0.000103
H16	3.54e-05	1.31e-06	1.24e-05	0.000182	2.51e-07	0.000863	7.65e-07	0.013805	1.24e-06	1.35e-05	2.09e-05	4.1e-08	1.7e-08	0.000102	5.79e-07	0.011713	0.000481	1.02e-07	8.69e-07
H17	3.42e-05	1.29e-06	6.12e-06	0.000182	1.95e-07	0.000866	2.57e-06	0.01373	2.54e-06	0.000122	1.35e-05	5.45e-08	3.39e-08	0.000189	2.05e-06	0.000481	0.011785	1.25e-07	1.47e-06
H18	6e-06	3.47e-05	2.16e-05	1.14e-05	0.000182	4.08e-06	0.000859	2.16e-06	0.013692	4.12e-07	4e-05	1.42e-05	0.000123	5.29e-06	0.000193	1.02e-07	1.25e-07	0.011728	0.000474
H19	5.62e-06	4.2e-05	5.27e-06	1.35e-05	0.000178	8e-05	0.000848	2.46e-05	0.01371	9.64e-07	2.26e-05	2.2e-05	1.34e-05	5.33e-05	0.000103	8.69e-07	1.47e-06	0.000474	0.011545
Weighted LDM — diallyl_trisulfide_19_LIDI_matrix (× 0.0285441)
	S1	S2	S3	C4	C5	C6	C7	C8	C9	H10	H11	H12	H13	H14	H15	H16	H17	H18	H19	Total
S1	0.417233	0.00224	0.018658	0.015011	0.000106	0.001234	3.1e-05	0.000599	2.1e-05	0.000833	0.000774	2.43e-05	5.59e-05	0.000185	5.88e-06	3.18e-05	3.56e-05	2.02e-05	9.26e-07	2.68319
S2	0.00224	0.417301	0.018704	9.14e-05	0.015087	3.91e-05	0.001105	3.01e-05	0.000611	2.21e-05	2.4e-05	0.000769	0.000825	6.42e-06	0.000204	2.05e-06	1.59e-06	3.57e-05	4.44e-05
S3	0.018658	0.018704	0.416036	0.001068	0.001064	0.000229	0.000493	0.000127	0.000317	6.11e-05	0.000343	0.000245	8.48e-05	8.72e-06	2.36e-05	1.31e-05	6.11e-06	1.83e-05	9.59e-06
C4	0.015011	9.14e-05	0.001068	0.114471	5.29e-05	0.014729	2.11e-05	0.001073	7.22e-05	0.013223	0.013072	5.2e-06	0.000101	0.000558	2.87e-06	0.000181	0.000182	0.000115	3.4e-06
C5	0.000106	0.015087	0.001064	5.29e-05	0.114515	6.97e-06	0.014758	2.17e-06	0.001056	8.67e-05	7.05e-06	0.013209	0.013193	1.7e-06	0.000562	3.2e-07	3.06e-07	0.000176	0.000179
C6	0.001234	3.91e-05	0.000229	0.014729	6.97e-06	0.113533	2.14e-06	0.026279	5.89e-06	0.000528	0.000519	6.25e-07	1.18e-05	0.013492	4.96e-07	0.000859	0.000866	9.36e-06	2.3e-07
C7	3.1e-05	0.001105	0.000493	2.11e-05	0.014758	2.14e-06	0.113139	1.73e-06	0.026154	9.21e-06	3.93e-05	0.00055	0.000528	1.45e-07	0.013478	1.55e-07	1.11e-07	0.000862	0.000857
C8	0.000599	3.01e-05	0.000127	0.001073	2.17e-06	0.026279	1.73e-06	0.116512	4.03e-06	0.000188	0.00026	1.95e-07	1.93e-06	0.000829	1.45e-07	0.013797	0.01373	3.55e-06	1.29e-07
C9	2.1e-05	0.000611	0.000317	7.22e-05	0.001056	5.89e-06	0.026154	4.03e-06	0.116432	3.39e-05	0.000124	0.000278	0.000178	4.38e-07	0.000821	3.49e-07	2.25e-07	0.013653	0.013799
H10	0.000833	2.21e-05	6.11e-05	0.013223	8.67e-05	0.000528	9.21e-06	0.000188	3.39e-05	0.011568	0.000423	6.71e-06	0.000158	0.000143	5.16e-06	1.37e-05	0.000121	6.61e-05	3.61e-06
H11	0.000774	2.4e-05	0.000343	0.013072	7.05e-06	0.000519	3.93e-05	0.00026	0.000124	0.000423	0.010868	1.3e-06	5.57e-06	4.5e-05	2.47e-06	2.19e-05	1.5e-05	0.000104	4.12e-06
H12	2.43e-05	0.000769	0.000245	5.2e-06	0.013209	6.25e-07	0.00055	1.95e-07	0.000278	6.71e-06	1.3e-06	0.01125	0.000419	2.41e-07	3.69e-05	1.58e-08	3.5e-08	1.39e-05	2.19e-05
H13	5.59e-05	0.000825	8.48e-05	0.000101	0.013193	1.18e-05	0.000528	1.93e-06	0.000178	0.000158	5.57e-06	0.000419	0.011389	4.28e-06	0.000146	1.62e-07	7.07e-07	0.000114	1.26e-05
H14	0.000185	6.42e-06	8.72e-06	0.000558	1.7e-06	0.013492	1.45e-07	0.000829	4.38e-07	0.000143	4.5e-05	2.41e-07	4.28e-06	0.011608	8.19e-08	0.000103	0.000193	1.26e-06	4.02e-08
H15	5.88e-06	0.000204	2.36e-05	2.87e-06	0.000562	4.96e-07	0.013478	1.45e-07	0.000821	5.16e-06	2.47e-06	3.69e-05	0.000146	8.19e-08	0.01164	1.9e-08	2.09e-08	0.000189	0.000103
H16	3.18e-05	2.05e-06	1.31e-05	0.000181	3.2e-07	0.000859	1.55e-07	0.013797	3.49e-07	1.37e-05	2.19e-05	1.58e-08	1.62e-07	0.000103	1.9e-08	0.011644	0.000479	3.13e-07	8.98e-09
H17	3.56e-05	1.59e-06	6.11e-06	0.000182	3.06e-07	0.000866	1.11e-07	0.01373	2.25e-07	0.000121	1.5e-05	3.5e-08	7.07e-07	0.000193	2.09e-08	0.000479	0.011772	3.61e-07	1.24e-08
H18	2.02e-05	3.57e-05	1.83e-05	0.000115	0.000176	9.36e-06	0.000862	3.55e-06	0.013653	6.61e-05	0.000104	1.39e-05	0.000114	1.26e-06	0.000189	3.13e-07	3.61e-07	0.011772	0.000476
H19	9.26e-07	4.44e-05	9.59e-06	3.4e-06	0.000179	2.3e-07	0.000857	1.29e-07	0.013799	3.61e-06	4.12e-06	2.19e-05	1.26e-05	4.02e-08	0.000103	8.98e-09	1.24e-08	0.000476	0.011665
Weighted LDM — diallyl_trisulfide_20_LIDI_matrix (× 0.0511004)
	S1	S2	S3	C4	C5	C6	C7	C8	C9	H10	H11	H12	H13	H14	H15	H16	H17	H18	H19	Total
S1	0.747343	0.003897	0.033265	0.026879	0.000263	0.002173	6.13e-05	0.001066	4.37e-05	0.001474	0.00147	3.06e-05	0.000308	0.000289	1.68e-05	5.62e-05	6.38e-05	3.66e-06	2.75e-06	4.8034
S2	0.003897	0.747338	0.03326	0.000263	0.026889	6.13e-05	0.002172	4.36e-05	0.001066	0.000308	3.06e-05	0.001469	0.001473	1.68e-05	0.000289	2.75e-06	3.66e-06	6.38e-05	5.61e-05
S3	0.033265	0.03326	0.746431	0.001949	0.001951	0.00047	0.00047	0.000258	0.000258	0.000162	0.000536	0.000536	0.000162	1.7e-05	1.7e-05	2.45e-05	1.22e-05	1.23e-05	2.45e-05
C4	0.026879	0.000263	0.001949	0.205083	2.87e-05	0.026345	4.16e-06	0.001911	2.99e-06	0.023696	0.023658	7.87e-06	1.03e-05	0.001004	4.33e-07	0.000324	0.000323	1.93e-07	3.19e-07
C5	0.000263	0.026889	0.001951	2.87e-05	0.205084	4.17e-06	0.026357	2.99e-06	0.001918	1.03e-05	7.87e-06	0.023656	0.023695	4.35e-07	0.001007	3.2e-07	1.94e-07	0.000324	0.000325
C6	0.002173	6.13e-05	0.00047	0.026345	4.17e-06	0.203275	1.23e-06	0.047064	8.46e-07	0.00093	0.000956	1.49e-06	1.44e-06	0.024193	1.84e-07	0.001542	0.001544	5.55e-08	8.47e-08
C7	6.13e-05	0.002172	0.00047	4.16e-06	0.026357	1.23e-06	0.203273	8.46e-07	0.047062	1.44e-06	1.49e-06	0.000956	0.000928	1.84e-07	0.024193	8.47e-08	5.55e-08	0.001543	0.001542
C8	0.001066	4.36e-05	0.000258	0.001911	2.99e-06	0.047064	8.46e-07	0.208504	7.82e-07	0.000326	0.000459	9.71e-07	1.6e-06	0.001501	1.57e-07	0.024705	0.024562	6.47e-08	5.06e-08
C9	4.37e-05	0.001066	0.000258	2.99e-06	0.001918	8.46e-07	0.047062	7.82e-07	0.208503	1.6e-06	9.71e-07	0.000459	0.000326	1.57e-07	0.001501	5.06e-08	6.47e-08	0.024562	0.024705
H10	0.001474	0.000308	0.000162	0.023696	1.03e-05	0.00093	1.44e-06	0.000326	1.6e-06	0.020129	0.000753	4.53e-06	3.04e-06	0.000255	3.63e-07	2.38e-05	0.000205	1.12e-07	5.9e-08
H11	0.00147	3.06e-05	0.000536	0.023658	7.87e-06	0.000956	1.49e-06	0.000459	9.71e-07	0.000753	0.019921	1.3e-06	4.53e-06	8.41e-05	9.77e-08	4.09e-05	2.67e-05	6.09e-08	1.24e-07
H12	3.06e-05	0.001469	0.000536	7.87e-06	0.023656	1.49e-06	0.000956	9.71e-07	0.000459	4.53e-06	1.3e-06	0.019921	0.000753	9.77e-08	8.41e-05	1.24e-07	6.09e-08	2.67e-05	4.09e-05
H13	0.000308	0.001473	0.000162	1.03e-05	0.023695	1.44e-06	0.000928	1.6e-06	0.000326	3.04e-06	4.53e-06	0.000753	0.020129	3.63e-07	0.000255	5.9e-08	1.12e-07	0.000205	2.38e-05
H14	0.000289	1.68e-05	1.7e-05	0.001004	4.35e-07	0.024193	1.84e-07	0.001501	1.57e-07	0.000255	8.41e-05	9.77e-08	3.63e-07	0.020905	3.92e-08	0.000186	0.000345	1.05e-08	7.79e-09
H15	1.68e-05	0.000289	1.7e-05	4.33e-07	0.001007	1.84e-07	0.024193	1.57e-07	0.001501	3.63e-07	9.77e-08	8.41e-05	0.000255	3.92e-08	0.020905	7.79e-09	1.05e-08	0.000345	0.000186
H16	5.62e-05	2.75e-06	2.45e-05	0.000324	3.2e-07	0.001542	8.47e-08	0.024705	5.06e-08	2.38e-05	4.09e-05	1.24e-07	5.9e-08	0.000186	7.79e-09	0.020896	0.000856	4.6e-09	6.48e-09
H17	6.38e-05	3.66e-06	1.22e-05	0.000323	1.94e-07	0.001544	5.55e-08	0.024562	6.47e-08	0.000205	2.67e-05	6.09e-08	1.12e-07	0.000345	1.05e-08	0.000856	0.020974	5.67e-09	4.6e-09
H18	3.66e-06	6.38e-05	1.23e-05	1.93e-07	0.000324	5.55e-08	0.001543	6.47e-08	0.024562	1.12e-07	6.09e-08	2.67e-05	0.000205	1.05e-08	0.000345	4.6e-09	5.67e-09	0.020974	0.000856
H19	2.75e-06	5.61e-05	2.45e-05	3.19e-07	0.000325	8.47e-08	0.001542	5.06e-08	0.024705	5.9e-08	1.24e-07	4.09e-05	2.38e-05	7.79e-09	0.000186	6.48e-09	4.6e-09	0.000856	0.020896
Weighted LDM — diallyl_trisulfide_21_LIDI_matrix (× 0.0177984)
	S1	S2	S3	C4	C5	C6	C7	C8	C9	H10	H11	H12	H13	H14	H15	H16	H17	H18	H19	Total
S1	0.260281	0.001363	0.011578	0.009358	9.88e-05	0.000754	1.98e-05	0.00037	1.74e-05	0.000512	0.000511	1.13e-05	0.000146	0.0001	2.84e-06	1.95e-05	2.21e-05	9.76e-07	1.12e-06	1.67304
S2	0.001363	0.260305	0.011558	9.53e-05	0.009366	2.14e-05	0.000757	1.5e-05	0.000368	0.000115	1.06e-05	0.000524	0.000498	6.02e-06	0.000103	9.51e-07	1.34e-06	2.24e-05	1.96e-05
S3	0.011578	0.011558	0.260031	0.000679	0.000679	0.000164	0.000166	9.04e-05	8.9e-05	5.64e-05	0.000184	8.83e-05	0.000128	5.92e-06	9.26e-06	8.57e-06	4.3e-06	4.33e-06	8.47e-06
C4	0.009358	9.53e-05	0.000679	0.071437	1.03e-05	0.009177	1.37e-06	0.000667	1.1e-06	0.008251	0.00824	2.07e-06	4.93e-06	0.00035	2.45e-07	0.000113	0.000113	6.43e-08	8.51e-08
C5	9.88e-05	0.009366	0.000679	1.03e-05	0.071425	1.43e-06	0.009177	1.05e-06	0.000667	3.88e-06	2.73e-06	0.008283	0.008203	1.6e-07	0.00035	1.09e-07	7.14e-08	0.000113	0.000113
C6	0.000754	2.14e-05	0.000164	0.009177	1.43e-06	0.070799	3.4e-07	0.016393	2.57e-07	0.000323	0.000333	3.98e-07	6.72e-07	0.008426	5.61e-08	0.000537	0.000538	1.63e-08	2.03e-08
C7	1.98e-05	0.000757	0.000166	1.37e-06	0.009177	3.4e-07	0.070803	1.95e-07	0.016395	5.17e-07	5.8e-07	0.000324	0.000335	5.05e-08	0.008426	2.15e-08	1.87e-08	0.000538	0.000538
C8	0.00037	1.5e-05	9.04e-05	0.000667	1.05e-06	0.016393	1.95e-07	0.072621	1.66e-07	0.000114	0.00016	3.27e-07	6.99e-07	0.000523	7.6e-08	0.008605	0.008556	9.99e-09	1.12e-08
C9	1.74e-05	0.000368	8.9e-05	1.1e-06	0.000667	2.57e-07	0.016395	1.66e-07	0.072619	3.46e-07	4.73e-07	0.000114	0.000159	3.64e-08	0.000523	9.72e-09	1.98e-08	0.008557	0.008605
H10	0.000512	0.000115	5.64e-05	0.008251	3.88e-06	0.000323	5.17e-07	0.000114	3.46e-07	0.007008	0.000262	1.95e-06	1.01e-06	8.88e-05	1.69e-07	8.31e-06	7.16e-05	3.57e-08	1.55e-08
H11	0.000511	1.06e-05	0.000184	0.00824	2.73e-06	0.000333	5.8e-07	0.00016	4.73e-07	0.000262	0.006936	2.69e-07	2.13e-06	2.92e-05	4.81e-08	1.42e-05	9.29e-06	2.71e-08	4.47e-08
H12	1.13e-05	0.000524	8.83e-05	2.07e-06	0.008283	3.98e-07	0.000324	3.27e-07	0.000114	1.95e-06	2.69e-07	0.007071	0.000261	5.03e-08	8.98e-05	3.3e-08	2.16e-08	7.12e-05	8.24e-06
H13	0.000146	0.000498	0.000128	4.93e-06	0.008203	6.72e-07	0.000335	6.99e-07	0.000159	1.01e-06	2.13e-06	0.000261	0.006875	1.61e-07	2.95e-05	2.7e-08	4.63e-08	9.32e-06	1.42e-05
H14	0.0001	6.02e-06	5.92e-06	0.00035	1.6e-07	0.008426	5.05e-08	0.000523	3.64e-08	8.88e-05	2.92e-05	5.03e-08	1.61e-07	0.00728	3.99e-09	6.46e-05	0.00012	2.04e-09	2.41e-09
H15	2.84e-06	0.000103	9.26e-06	2.45e-07	0.00035	5.61e-08	0.008426	7.6e-08	0.000523	1.69e-07	4.81e-08	8.98e-05	2.95e-05	3.99e-09	0.007286	6.19e-09	5.93e-09	0.00012	6.49e-05
H16	1.95e-05	9.51e-07	8.57e-06	0.000113	1.09e-07	0.000537	2.15e-08	0.008605	9.72e-09	8.31e-06	1.42e-05	3.3e-08	2.7e-08	6.46e-05	6.19e-09	0.007275	0.000298	8.88e-10	1.41e-09
H17	2.21e-05	1.34e-06	4.3e-06	0.000113	7.14e-08	0.000538	1.87e-08	0.008556	1.98e-08	7.16e-05	9.29e-06	2.16e-08	4.63e-08	0.00012	5.93e-09	0.000298	0.007308	1.13e-09	1.16e-09
H18	9.76e-07	2.24e-05	4.33e-06	6.43e-08	0.000113	1.63e-08	0.000538	9.99e-09	0.008557	3.57e-08	2.71e-08	7.12e-05	9.32e-06	2.04e-09	0.00012	8.88e-10	1.13e-09	0.007308	0.000298
H19	1.12e-06	1.96e-05	8.47e-06	8.51e-08	0.000113	2.03e-08	0.000538	1.12e-08	0.008605	1.55e-08	4.47e-08	8.24e-06	1.42e-05	2.41e-09	6.49e-05	1.41e-09	1.16e-09	0.000298	0.007279
Weighted LDM — diallyl_trisulfide_22_LIDI_matrix (× 0.00721167)
	S1	S2	S3	C4	C5	C6	C7	C8	C9	H10	H11	H12	H13	H14	H15	H16	H17	H18	H19	Total
S1	0.105469	0.000551	0.004704	0.003796	4.48e-05	0.000293	6.74e-06	0.000168	4.71e-06	0.000205	0.000194	6.62e-05	5.83e-06	4.48e-05	6.61e-07	9.49e-06	1.11e-05	3.91e-06	3.17e-07	0.677894
S2	0.000551	0.105315	0.004639	4.41e-05	0.003885	7.17e-06	0.000237	5.62e-06	0.000139	6.11e-05	5.78e-06	0.000209	0.000193	2.21e-06	6.01e-05	6.43e-06	3.75e-07	0.000148	1.14e-05
S3	0.004704	0.004639	0.105052	0.00027	0.000272	0.000107	6.63e-05	9.94e-05	6.64e-05	3.13e-05	6.27e-05	4.58e-05	6.28e-05	3.65e-06	5.01e-06	1.76e-05	2.71e-06	3.11e-05	1.95e-06
C4	0.003796	4.41e-05	0.00027	0.028953	3.92e-06	0.003733	1.2e-06	0.000267	1.16e-06	0.003326	0.003349	1.84e-06	3.08e-07	0.000144	1.95e-07	4.55e-05	4.53e-05	5.4e-07	3.93e-08
C5	4.48e-05	0.003885	0.000272	3.92e-06	0.029021	1.74e-06	0.003693	1.24e-06	0.000251	1.78e-06	3e-07	0.003313	0.003334	9.24e-08	0.000148	5.09e-07	3.66e-08	3.22e-05	4.68e-05
C6	0.000293	7.17e-06	0.000107	0.003733	1.74e-06	0.028607	2.37e-07	0.006611	1.35e-07	0.00013	0.000138	1.1e-06	3.76e-07	0.003414	3.63e-08	0.000216	0.000218	4.97e-08	6.03e-09
C7	6.74e-06	0.000237	6.63e-05	1.2e-06	0.003693	2.37e-07	0.028761	1.57e-07	0.006693	9.15e-07	2.33e-07	0.000139	0.000144	1.84e-08	0.003417	1.67e-07	9.29e-09	0.000212	0.000226
C8	0.000168	5.62e-06	9.94e-05	0.000267	1.24e-06	0.006611	1.57e-07	0.029397	1.46e-07	4.47e-05	6.38e-05	9.02e-07	2.39e-07	0.000209	3.68e-08	0.003462	0.003489	4.22e-08	6.4e-09
C9	4.71e-06	0.000139	6.64e-05	1.16e-06	0.000251	1.35e-07	0.006693	1.46e-07	0.029394	2.79e-07	2.74e-07	6.5e-05	7.84e-05	9.56e-09	0.000216	5.27e-08	7.06e-09	0.003408	0.003489
H10	0.000205	6.11e-05	3.13e-05	0.003326	1.78e-06	0.00013	9.15e-07	4.47e-05	2.79e-07	0.002803	0.000105	3.83e-07	1.19e-07	3.62e-05	1.83e-07	2.92e-05	3.2e-06	2.43e-07	1.64e-08
H11	0.000194	5.78e-06	6.27e-05	0.003349	3e-07	0.000138	2.33e-07	6.38e-05	2.74e-07	0.000105	0.002866	9.39e-08	3.59e-08	1.11e-05	2.26e-08	3.54e-06	5.74e-06	1.83e-07	9.79e-09
H12	6.62e-05	0.000209	4.58e-05	1.84e-06	0.003313	1.1e-06	0.000139	9.02e-07	6.5e-05	3.83e-07	9.39e-08	0.002773	0.000108	8.3e-08	1.17e-05	7.45e-08	5.48e-08	3.49e-06	5.02e-06
H13	5.83e-06	0.000193	6.28e-05	3.08e-07	0.003334	3.76e-07	0.000144	2.39e-07	7.84e-05	1.19e-07	3.59e-08	0.000108	0.002842	2.03e-08	7.06e-06	1.47e-08	5.76e-09	3.36e-06	5.1e-06
H14	4.48e-05	2.21e-06	3.65e-06	0.000144	9.24e-08	0.003414	1.84e-08	0.000209	9.56e-09	3.62e-05	1.11e-05	8.3e-08	2.03e-08	0.002972	4.01e-09	4.86e-05	2.62e-05	8.09e-09	9.88e-10
H15	6.61e-07	6.01e-05	5.01e-06	1.95e-07	0.000148	3.63e-08	0.003417	3.68e-08	0.000216	1.83e-07	2.26e-08	1.17e-05	7.06e-06	4.01e-09	0.003009	5.38e-08	1.07e-09	4.8e-05	2.87e-05
H16	9.49e-06	6.43e-06	1.76e-05	4.55e-05	5.09e-07	0.000216	1.67e-07	0.003462	5.27e-08	2.92e-05	3.54e-06	7.45e-08	1.47e-08	4.86e-05	5.38e-08	0.00296	0.000121	2.05e-08	1.81e-09
H17	1.11e-05	3.75e-07	2.71e-06	4.53e-05	3.66e-08	0.000218	9.29e-09	0.003489	7.06e-09	3.2e-06	5.74e-06	5.48e-08	5.76e-09	2.62e-05	1.07e-09	0.000121	0.002962	1.74e-09	4.07e-10
H18	3.91e-06	0.000148	3.11e-05	5.4e-07	3.22e-05	4.97e-08	0.000212	4.22e-08	0.003408	2.43e-07	1.83e-07	3.49e-06	3.36e-06	8.09e-09	4.8e-05	2.05e-08	1.74e-09	0.002828	0.000115
H19	3.17e-07	1.14e-05	1.95e-06	3.93e-08	4.68e-05	6.03e-09	0.000226	6.4e-09	0.003489	1.64e-08	9.79e-09	5.02e-06	5.1e-06	9.88e-10	2.87e-05	1.81e-09	4.07e-10	0.000115	0.002973
Weighted LDM — diallyl_trisulfide_23_LIDI_matrix (× 0.0203015)
	S1	S2	S3	C4	C5	C6	C7	C8	C9	H10	H11	H12	H13	H14	H15	H16	H17	H18	H19	Total
S1	0.296886	0.001559	0.013178	0.010682	0.000118	0.000862	2.27e-05	0.000419	2e-05	0.000567	0.000599	1.3e-05	0.00018	0.000118	3.39e-06	2.24e-05	2.55e-05	1.14e-06	1.3e-06	1.90831
S2	0.001559	0.296885	0.013176	0.000118	0.010681	2.27e-05	0.000862	2e-05	0.000419	0.00018	1.3e-05	0.000598	0.000567	3.39e-06	0.000118	1.3e-06	1.14e-06	2.55e-05	2.24e-05
S3	0.013178	0.013176	0.296657	0.000774	0.000773	0.000189	0.000189	0.000102	0.000102	0.000144	9.96e-05	9.96e-05	0.000144	1.05e-05	1.05e-05	9.69e-06	4.94e-06	4.94e-06	9.69e-06
C4	0.010682	0.000118	0.000774	0.081477	1.23e-05	0.010465	1.55e-06	0.00076	1.28e-06	0.009354	0.009445	2.47e-06	6.1e-06	0.000399	2.94e-07	0.000129	0.000128	7.57e-08	9.56e-08
C5	0.000118	0.010681	0.000773	1.23e-05	0.081477	1.55e-06	0.010465	1.29e-06	0.00076	6.1e-06	2.47e-06	0.009447	0.009352	2.94e-07	0.000399	9.57e-08	7.57e-08	0.000128	0.000129
C6	0.000862	2.27e-05	0.000189	0.010465	1.55e-06	0.080759	3.27e-07	0.018699	1.96e-07	0.000381	0.000368	4.9e-07	7.33e-07	0.009611	8.77e-08	0.000613	0.000613	1.78e-08	1.87e-08
C7	2.27e-05	0.000862	0.000189	1.55e-06	0.010465	3.27e-07	0.080759	1.96e-07	0.018699	7.34e-07	4.9e-07	0.000368	0.000381	8.77e-08	0.009611	1.87e-08	1.78e-08	0.000613	0.000613
C8	0.000419	2e-05	0.000102	0.00076	1.29e-06	0.018699	1.96e-07	0.082829	5.3e-08	0.000181	0.000129	5.45e-07	4.25e-07	0.000596	1.06e-07	0.009814	0.009759	9.49e-09	7.03e-09
C9	2e-05	0.000419	0.000102	1.28e-06	0.00076	1.96e-07	0.018699	5.3e-08	0.08283	4.25e-07	5.45e-07	0.000129	0.000181	1.06e-07	0.000596	7.02e-09	9.49e-09	0.009759	0.009815
H10	0.000567	0.00018	0.000144	0.009354	6.1e-06	0.000381	7.34e-07	0.000181	4.25e-07	0.007835	0.000297	3e-06	1.01e-06	3.36e-05	2.24e-07	1.62e-05	1.06e-05	4.98e-08	2.12e-08
H11	0.000599	1.3e-05	9.96e-05	0.009445	2.47e-06	0.000368	4.9e-07	0.000129	5.45e-07	0.000297	0.00806	2.41e-07	2.99e-06	0.000102	6.04e-08	9.38e-06	8.11e-05	2.85e-08	4.19e-08
H12	1.3e-05	0.000598	9.96e-05	2.47e-06	0.009447	4.9e-07	0.000368	5.45e-07	0.000129	3e-06	2.41e-07	0.00806	0.000297	6.04e-08	0.000102	4.19e-08	2.85e-08	8.11e-05	9.38e-06
H13	0.00018	0.000567	0.000144	6.1e-06	0.009352	7.33e-07	0.000381	4.25e-07	0.000181	1.01e-06	2.99e-06	0.000297	0.007834	2.24e-07	3.36e-05	2.12e-08	4.98e-08	1.06e-05	1.62e-05
H14	0.000118	3.39e-06	1.05e-05	0.000399	2.94e-07	0.009611	8.77e-08	0.000596	1.06e-07	3.36e-05	0.000102	6.04e-08	2.24e-07	0.008312	2.12e-08	7.4e-05	0.000137	5.96e-09	6.55e-09
H15	3.39e-06	0.000118	1.05e-05	2.94e-07	0.000399	8.77e-08	0.009611	1.06e-07	0.000596	2.24e-07	6.04e-08	0.000102	3.36e-05	2.12e-08	0.008312	6.56e-09	5.96e-09	0.000137	7.4e-05
H16	2.24e-05	1.3e-06	9.69e-06	0.000129	9.57e-08	0.000613	1.87e-08	0.009814	7.02e-09	1.62e-05	9.38e-06	4.19e-08	2.12e-08	7.4e-05	6.56e-09	0.0083	0.00034	9.09e-10	9.79e-10
H17	2.55e-05	1.14e-06	4.94e-06	0.000128	7.57e-08	0.000613	1.78e-08	0.009759	9.49e-09	1.06e-05	8.11e-05	2.85e-08	4.98e-08	0.000137	5.96e-09	0.00034	0.008334	8.94e-10	9.08e-10
H18	1.14e-06	2.55e-05	4.94e-06	7.57e-08	0.000128	1.78e-08	0.000613	9.49e-09	0.009759	4.98e-08	2.85e-08	8.11e-05	1.06e-05	5.96e-09	0.000137	9.09e-10	8.94e-10	0.008334	0.00034
H19	1.3e-06	2.24e-05	9.69e-06	9.56e-08	0.000129	1.87e-08	0.000613	7.03e-09	0.009815	2.12e-08	4.19e-08	9.38e-06	1.62e-05	6.55e-09	7.4e-05	9.79e-10	9.08e-10	0.00034	0.0083
Weighted LDM — diallyl_trisulfide_24_LIDI_matrix (× 0.00376312)
	S1	S2	S3	C4	C5	C6	C7	C8	C9	H10	H11	H12	H13	H14	H15	H16	H17	H18	H19	Total
S1	0.055027	0.000289	0.002449	0.001979	2.23e-05	0.00016	3.31e-06	7.84e-05	1.59e-06	0.000108	0.000108	2.97e-06	3.29e-05	2.13e-05	1.49e-06	4.13e-06	4.67e-06	1.55e-07	1.68e-07	0.353738
S2	0.000289	0.055034	0.002443	2.03e-05	0.001993	4.56e-06	0.000157	3.19e-06	7.95e-05	2.27e-06	2.43e-05	9.74e-05	0.00011	1.28e-06	1.38e-05	2.03e-07	2.82e-07	3.62e-06	5.71e-06
S3	0.002449	0.002443	0.054939	0.000143	0.000141	3.45e-05	3.29e-05	1.9e-05	6.55e-06	3.91e-05	1.17e-05	3.21e-05	2.28e-05	1.24e-06	4.37e-05	1.8e-06	9.04e-07	1.66e-06	7.67e-07
C4	0.001979	2.03e-05	0.000143	0.015104	2.03e-06	0.001941	5.53e-07	0.000141	2.51e-07	0.001742	0.001744	1.66e-07	1.06e-06	7.42e-05	6.65e-07	2.39e-05	2.38e-05	3.5e-08	2.76e-08
C5	2.23e-05	0.001993	0.000141	2.03e-06	0.015112	2.79e-07	0.001942	2.1e-07	0.00014	5.87e-07	7.16e-07	0.001746	0.001733	3.27e-08	7.23e-05	2.07e-08	1.43e-08	2.4e-05	2.38e-05
C6	0.00016	4.56e-06	3.45e-05	0.001941	2.79e-07	0.01497	1.16e-07	0.003466	3.6e-08	7.03e-05	6.83e-05	4.5e-08	1.52e-07	0.001782	1.56e-07	0.000114	0.000114	7.69e-09	5.08e-09
C7	3.31e-06	0.000157	3.29e-05	5.53e-07	0.001942	1.16e-07	0.01495	9.05e-08	0.003478	7.9e-08	4.13e-07	6.83e-05	7.08e-05	1.31e-08	0.001767	9.52e-09	6.23e-09	0.000116	0.000115
C8	7.84e-05	3.19e-06	1.9e-05	0.000141	2.1e-07	0.003466	9.05e-08	0.015354	4.27e-08	3.38e-05	2.4e-05	1.89e-08	1.55e-07	0.00011	9.28e-08	0.001819	0.001809	6.84e-09	7.01e-09
C9	1.59e-06	7.95e-05	6.55e-06	2.51e-07	0.00014	3.6e-08	0.003478	4.27e-08	0.015363	2.82e-08	2.54e-07	2.44e-05	3.47e-05	9e-09	0.000108	2.7e-09	4.09e-09	0.001813	0.001821
H10	0.000108	2.27e-06	3.91e-05	0.001742	5.87e-07	7.03e-05	7.9e-08	3.38e-05	2.82e-08	0.001465	5.53e-05	1.03e-07	4.5e-07	6.17e-06	7.66e-08	3.01e-06	1.96e-06	6.08e-09	4.03e-09
H11	0.000108	2.43e-05	1.17e-05	0.001744	7.16e-07	6.83e-05	4.13e-07	2.4e-05	2.54e-07	5.53e-05	0.001481	4.6e-08	2.3e-07	1.88e-05	2.77e-08	1.76e-06	1.51e-05	9.39e-09	2.11e-08
H12	2.97e-06	9.74e-05	3.21e-05	1.66e-07	0.001746	4.5e-08	6.83e-05	1.89e-08	2.44e-05	1.03e-07	4.6e-08	0.001498	5.44e-05	6.02e-09	1.92e-05	2.43e-09	1.87e-09	1.63e-05	1.84e-06
H13	3.29e-05	0.00011	2.28e-05	1.06e-06	0.001733	1.52e-07	7.08e-05	1.55e-07	3.47e-05	4.5e-07	2.3e-07	5.44e-05	0.001447	3.77e-08	4.05e-06	5.86e-09	1.04e-08	1.68e-06	2.85e-06
H14	2.13e-05	1.28e-06	1.24e-06	7.42e-05	3.27e-08	0.001782	1.31e-08	0.00011	9e-09	6.17e-06	1.88e-05	6.02e-09	3.77e-08	0.001539	3.08e-09	1.37e-05	2.54e-05	4.4e-10	7.1e-10
H15	1.49e-06	1.38e-05	4.37e-05	6.65e-07	7.23e-05	1.56e-07	0.001767	9.28e-08	0.000108	7.66e-08	2.77e-08	1.92e-05	4.05e-06	3.08e-09	0.001513	1.28e-08	4.76e-09	2.49e-05	1.36e-05
H16	4.13e-06	2.03e-07	1.8e-06	2.39e-05	2.07e-08	0.000114	9.52e-09	0.001819	2.7e-09	3.01e-06	1.76e-06	2.43e-09	5.86e-09	1.37e-05	1.28e-08	0.001538	6.3e-05	7.51e-10	5.92e-10
H17	4.67e-06	2.82e-07	9.04e-07	2.38e-05	1.43e-08	0.000114	6.23e-09	0.001809	4.09e-09	1.96e-06	1.51e-05	1.87e-09	1.04e-08	2.54e-05	4.76e-09	6.3e-05	0.001544	3.82e-10	3.79e-10
H18	1.55e-07	3.62e-06	1.66e-06	3.5e-08	2.4e-05	7.69e-09	0.000116	6.84e-09	0.001813	6.08e-09	9.39e-09	1.63e-05	1.68e-06	4.4e-10	2.49e-05	7.51e-10	3.82e-10	0.00157	6.4e-05
H19	1.68e-07	5.71e-06	7.67e-07	2.76e-08	2.38e-05	5.08e-09	0.000115	7.01e-09	0.001821	4.03e-09	2.11e-08	1.84e-06	2.85e-06	7.1e-10	1.36e-05	5.92e-10	3.79e-10	6.4e-05	0.001546
Weighted LDM — diallyl_trisulfide_25_LIDI_matrix (× 0.00279216)
	S1	S2	S3	C4	C5	C6	C7	C8	C9	H10	H11	H12	H13	H14	H15	H16	H17	H18	H19	Total
S1	0.04083	0.000215	0.001812	0.001478	1.64e-05	0.000116	3.15e-06	5.89e-05	2.77e-06	8.17e-05	7.22e-05	2.5e-05	1.82e-06	1.03e-05	4.64e-07	4.23e-06	2.69e-06	1.58e-07	1.8e-07	0.262463
S2	0.000215	0.040828	0.001812	1.74e-05	0.001469	2.48e-06	0.000119	1.2e-06	5.78e-05	2.64e-05	2.22e-06	7.79e-05	8.22e-05	1.08e-06	1.62e-05	1.27e-07	1.15e-07	3.51e-06	3.08e-06
S3	0.001812	0.001812	0.040772	0.000104	0.000106	2.41e-05	2.59e-05	4.86e-06	1.4e-05	1.68e-05	2.38e-05	1.97e-05	1.37e-05	3.22e-05	1.44e-06	5.69e-07	1.23e-06	6.77e-07	1.32e-06
C4	0.001478	1.74e-05	0.000104	0.011214	1.57e-06	0.001441	1.98e-07	0.000104	1.63e-07	0.001285	0.001295	7.3e-07	3.5e-07	5.37e-05	4.21e-08	1.77e-05	1.78e-05	9.95e-09	1.12e-08
C5	1.64e-05	0.001469	0.000106	1.57e-06	0.011206	4.22e-07	0.00144	2.07e-07	0.000105	8.57e-07	1.19e-07	0.001286	0.001299	4.83e-07	5.49e-05	2.15e-08	2.58e-08	1.77e-05	1.77e-05
C6	0.000116	2.48e-06	2.41e-05	0.001441	4.22e-07	0.011093	8.88e-08	0.00258	8.7e-08	5.25e-05	5.06e-05	4.28e-07	4.14e-08	0.001311	8.33e-09	8.5e-05	8.58e-05	4.65e-09	7.45e-09
C7	3.15e-06	0.000119	2.59e-05	1.98e-07	0.00144	8.88e-08	0.011108	2.03e-08	0.002572	1.06e-07	2.66e-08	5.24e-05	5.07e-05	1.17e-07	0.001322	4.48e-09	6.2e-09	8.44e-05	8.43e-05
C8	5.89e-05	1.2e-06	4.86e-06	0.000104	2.07e-07	0.00258	2.03e-08	0.011399	3.56e-08	2.57e-05	1.81e-05	2.65e-07	1.91e-08	8.03e-05	4.36e-09	0.001351	0.001345	1.53e-09	2.15e-09
C9	2.77e-06	5.78e-05	1.4e-05	1.63e-07	0.000105	8.7e-08	0.002572	3.56e-08	0.011392	6.11e-08	1.08e-08	2.49e-05	1.78e-05	6.49e-08	8.19e-05	7.22e-09	6.03e-09	0.001342	0.00135
H10	8.17e-05	2.64e-05	1.68e-05	0.001285	8.57e-07	5.25e-05	1.06e-07	2.57e-05	6.11e-08	0.001073	4.03e-05	1.45e-07	4.25e-07	3.01e-06	3.42e-08	2.11e-06	1.25e-06	7.34e-09	3.01e-09
H11	7.22e-05	2.22e-06	2.38e-05	0.001295	1.19e-07	5.06e-05	2.66e-08	1.81e-05	1.08e-08	4.03e-05	0.001111	3.79e-08	5.51e-08	1.42e-05	1.01e-08	1.36e-06	1.21e-05	1.55e-09	1.26e-09
H12	2.5e-05	7.79e-05	1.97e-05	7.3e-07	0.001286	4.28e-07	5.24e-05	2.65e-07	2.49e-05	1.45e-07	3.79e-08	0.001077	4.08e-05	4.61e-08	4.62e-06	2.23e-08	1.01e-08	1.46e-06	2.22e-06
H13	1.82e-06	8.22e-05	1.37e-05	3.5e-07	0.001299	4.14e-08	5.07e-05	1.91e-08	1.78e-05	4.25e-07	5.51e-08	4.08e-05	0.001108	2.73e-08	1.41e-05	2.76e-09	2.85e-09	1.12e-05	1.29e-06
H14	1.03e-05	1.08e-06	3.22e-05	5.37e-05	4.83e-07	0.001311	1.17e-07	8.03e-05	6.49e-08	3.01e-06	1.42e-05	4.61e-08	2.73e-08	0.001122	2.8e-09	1.01e-05	1.85e-05	3.46e-09	9.25e-09
H15	4.64e-07	1.62e-05	1.44e-06	4.21e-08	5.49e-05	8.33e-09	0.001322	4.36e-09	8.19e-05	3.42e-08	1.01e-08	4.62e-06	1.41e-05	2.8e-09	0.001142	4.14e-10	4.35e-10	1.89e-05	1.02e-05
H16	4.23e-06	1.27e-07	5.69e-07	1.77e-05	2.15e-08	8.5e-05	4.48e-09	0.001351	7.22e-09	2.11e-06	1.36e-06	2.23e-08	2.76e-09	1.01e-05	4.14e-10	0.001147	4.74e-05	3.22e-10	4.12e-10
H17	2.69e-06	1.15e-07	1.23e-06	1.78e-05	2.58e-08	8.58e-05	6.2e-09	0.001345	6.03e-09	1.25e-06	1.21e-05	1.01e-08	2.85e-09	1.85e-05	4.35e-10	4.74e-05	0.001165	2.95e-10	5.28e-10
H18	1.58e-07	3.51e-06	6.77e-07	9.95e-09	1.77e-05	4.65e-09	8.44e-05	1.53e-09	0.001342	7.34e-09	1.55e-09	1.46e-06	1.12e-05	3.46e-09	1.89e-05	3.22e-10	2.95e-10	0.001146	4.67e-05
H19	1.8e-07	3.08e-06	1.32e-06	1.12e-08	1.77e-05	7.45e-09	8.43e-05	2.15e-09	0.00135	3.01e-09	1.26e-09	2.22e-06	1.29e-06	9.25e-09	1.02e-05	4.12e-10	5.28e-10	4.67e-05	0.001141
Weighted LDM — diallyl_trisulfide_26_LIDI_matrix (× 0.00163481)
	S1	S2	S3	C4	C5	C6	C7	C8	C9	H10	H11	H12	H13	H14	H15	H16	H17	H18	H19	Total
S1	0.023904	0.000126	0.001061	0.000866	1.02e-05	6.81e-05	1.47e-06	3.45e-05	7e-07	4.23e-05	4.79e-05	1.56e-05	1.31e-06	6.05e-06	6.37e-07	2.47e-06	1.57e-06	6.82e-08	7.61e-08	0.153673
S2	0.000126	0.023904	0.001061	1.02e-05	0.000865	1.47e-06	6.8e-05	7.01e-07	3.45e-05	1.31e-06	1.56e-05	4.78e-05	4.23e-05	6.34e-07	6e-06	7.62e-08	6.81e-08	1.57e-06	2.47e-06
S3	0.001061	0.001061	0.023855	6.07e-05	6.06e-05	1.42e-05	1.43e-05	2.85e-06	2.85e-06	1.39e-05	9.79e-06	9.77e-06	1.39e-05	1.9e-05	1.9e-05	3.35e-07	7.2e-07	7.2e-07	3.35e-07
C4	0.000866	1.02e-05	6.07e-05	0.006566	8.47e-07	0.000844	2.54e-07	6.1e-05	1.19e-07	0.000758	0.000752	4.39e-07	5.97e-08	3.14e-05	2.87e-07	1.04e-05	1.04e-05	1.51e-08	1.28e-08
C5	1.02e-05	0.000865	6.06e-05	8.47e-07	0.006566	2.54e-07	0.000844	1.19e-07	6.1e-05	5.96e-08	4.39e-07	0.000752	0.000758	2.87e-07	3.14e-05	1.28e-08	1.51e-08	1.04e-05	1.04e-05
C6	6.81e-05	1.47e-06	1.42e-05	0.000844	2.54e-07	0.006495	3.5e-08	0.001511	1.62e-08	2.96e-05	3.07e-05	2.55e-07	4.38e-08	0.000768	2.66e-08	4.97e-05	5.03e-05	2.63e-09	2.27e-09
C7	1.47e-06	6.8e-05	1.43e-05	2.54e-07	0.000844	3.5e-08	0.006495	1.63e-08	0.001511	4.39e-08	2.55e-07	3.07e-05	2.97e-05	2.66e-08	0.000768	2.27e-09	2.63e-09	5.03e-05	4.97e-05
C8	3.45e-05	7.01e-07	2.85e-06	6.1e-05	1.19e-07	0.001511	1.63e-08	0.006673	2.58e-08	1.06e-05	1.5e-05	1.57e-07	7.79e-09	4.7e-05	1.27e-08	0.000791	0.000788	1.6e-09	1.77e-09
C9	7e-07	3.45e-05	2.85e-06	1.19e-07	6.1e-05	1.62e-08	0.001511	2.58e-08	0.006674	7.78e-09	1.57e-07	1.5e-05	1.06e-05	1.26e-08	4.7e-05	1.77e-09	1.6e-09	0.000788	0.000791
H10	4.23e-05	1.31e-06	1.39e-05	0.000758	5.96e-08	2.96e-05	4.39e-08	1.06e-05	7.78e-09	0.00065	2.36e-05	2.37e-08	6.98e-09	8.31e-06	6.37e-08	7.97e-07	7.04e-06	3.11e-09	2.06e-09
H11	4.79e-05	1.56e-05	9.79e-06	0.000752	4.39e-07	3.07e-05	2.55e-07	1.5e-05	1.57e-07	2.36e-05	0.000628	9.02e-08	2.37e-08	1.76e-06	2.27e-08	1.24e-06	7.29e-07	5.94e-09	1.34e-08
H12	1.56e-05	4.78e-05	9.77e-06	4.39e-07	0.000752	2.55e-07	3.07e-05	1.57e-07	1.5e-05	2.37e-08	9.02e-08	0.000628	2.36e-05	2.27e-08	1.76e-06	1.34e-08	5.94e-09	7.29e-07	1.24e-06
H13	1.31e-06	4.23e-05	1.39e-05	5.97e-08	0.000758	4.38e-08	2.97e-05	7.79e-09	1.06e-05	6.98e-09	2.37e-08	2.36e-05	0.00065	6.37e-08	8.31e-06	2.06e-09	3.1e-09	7.04e-06	7.97e-07
H14	6.05e-06	6.34e-07	1.9e-05	3.14e-05	2.87e-07	0.000768	2.66e-08	4.7e-05	1.26e-08	8.31e-06	1.76e-06	2.27e-08	6.37e-08	0.000657	3.61e-08	5.89e-06	1.08e-05	3.21e-09	2.2e-09
H15	6.37e-07	6e-06	1.9e-05	2.87e-07	3.14e-05	2.66e-08	0.000768	1.27e-08	4.7e-05	6.37e-08	2.27e-08	1.76e-06	8.31e-06	3.61e-08	0.000657	2.2e-09	3.21e-09	1.08e-05	5.89e-06
H16	2.47e-06	7.62e-08	3.35e-07	1.04e-05	1.28e-08	4.97e-05	2.27e-09	0.000791	1.77e-09	7.97e-07	1.24e-06	1.34e-08	2.06e-09	5.89e-06	2.2e-09	0.000671	2.78e-05	1.61e-10	1.21e-10
H17	1.57e-06	6.81e-08	7.2e-07	1.04e-05	1.51e-08	5.03e-05	2.63e-09	0.000788	1.6e-09	7.04e-06	7.29e-07	5.94e-09	3.1e-09	1.08e-05	3.21e-09	2.78e-05	0.000682	2.66e-10	1.61e-10
H18	6.82e-08	1.57e-06	7.2e-07	1.51e-08	1.04e-05	2.63e-09	5.03e-05	1.6e-09	0.000788	3.11e-09	5.94e-09	7.29e-07	7.04e-06	3.21e-09	1.08e-05	1.61e-10	2.66e-10	0.000682	2.78e-05
H19	7.61e-08	2.47e-06	3.35e-07	1.28e-08	1.04e-05	2.27e-09	4.97e-05	1.77e-09	0.000791	2.06e-09	1.34e-08	1.24e-06	7.97e-07	2.2e-09	5.89e-06	1.21e-10	1.61e-10	2.78e-05	0.000671
Weighted LDM — diallyl_trisulfide_27_LIDI_matrix (× 0.000638372)
	S1	S2	S3	C4	C5	C6	C7	C8	C9	H10	H11	H12	H13	H14	H15	H16	H17	H18	H19	Total
S1	0.009333	5.01e-05	0.000417	0.000336	2.32e-06	2.7e-05	7.03e-07	1.32e-05	4.15e-07	1.86e-05	1.79e-05	5.77e-07	1.1e-06	3.63e-06	1.32e-07	7.02e-07	7.99e-07	1.9e-08	3.89e-07	0.060007
S2	5.01e-05	0.009333	0.000418	2.13e-06	0.000337	7.02e-07	2.48e-05	5.11e-07	1.38e-05	4.54e-07	6.61e-07	1.73e-05	1.85e-05	7.98e-08	4.61e-06	3.78e-08	2.83e-08	9.96e-07	7.93e-07
S3	0.000417	0.000418	0.009306	2.38e-05	2.36e-05	5.83e-06	1.1e-05	3.17e-06	7.37e-06	3.18e-06	3.51e-06	5.41e-06	1.75e-06	3.41e-07	5.24e-07	2.91e-07	1.55e-07	2.17e-07	4.44e-07
C4	0.000336	2.13e-06	2.38e-05	0.002557	1.12e-06	0.000329	3.8e-07	2.38e-05	1.17e-06	0.000297	0.000293	1.1e-07	2e-06	1.26e-05	6.09e-08	4.04e-06	4.04e-06	6.23e-08	2.08e-06
C5	2.32e-06	0.000337	2.36e-05	1.12e-06	0.002561	1.25e-07	0.00033	9.2e-08	2.36e-05	8.39e-08	2.37e-06	0.000295	0.000295	1.07e-08	1.26e-05	1.13e-08	5.04e-09	4e-06	3.87e-06
C6	2.7e-05	7.02e-07	5.83e-06	0.000329	1.25e-07	0.00254	3.66e-08	0.000588	1.05e-07	1.16e-05	1.21e-05	1.1e-08	1.43e-07	0.000302	7.17e-09	1.92e-05	1.93e-05	4.41e-09	1.63e-07
C7	7.03e-07	2.48e-05	1.1e-05	3.8e-07	0.00033	3.66e-08	0.00253	2.82e-08	0.000585	1.23e-07	6.64e-07	1.23e-05	1.18e-05	2.9e-09	0.000301	2.74e-09	1.78e-09	1.92e-05	1.94e-05
C8	1.32e-05	5.11e-07	3.17e-06	2.38e-05	9.2e-08	0.000588	2.82e-08	0.002604	7.04e-08	4.09e-06	5.64e-06	1.03e-08	1.25e-07	1.88e-05	3.56e-09	0.000309	0.000307	5.18e-09	1.1e-07
C9	4.15e-07	1.38e-05	7.37e-06	1.17e-06	2.36e-05	1.05e-07	0.000585	7.04e-08	0.002603	3.64e-07	2.52e-06	6.19e-06	3.89e-06	8.59e-09	1.84e-05	6.6e-09	3.75e-09	0.000309	0.000306
H10	1.86e-05	4.54e-07	3.18e-06	0.000297	8.39e-08	1.16e-05	1.23e-07	4.09e-06	3.64e-07	0.000253	9.55e-06	2.03e-08	1.23e-07	3.23e-06	9.77e-09	2.97e-07	2.57e-06	9.13e-09	2.97e-07
H11	1.79e-05	6.61e-07	3.51e-06	0.000293	2.37e-06	1.21e-05	6.64e-07	5.64e-06	2.52e-06	9.55e-06	0.000252	1.91e-07	3.87e-06	1.05e-06	1.5e-07	4.96e-07	3.32e-07	1.9e-07	3.62e-06
H12	5.77e-07	1.73e-05	5.41e-06	1.1e-07	0.000295	1.1e-08	1.23e-05	1.03e-08	6.19e-06	2.03e-08	1.91e-07	0.000251	9.41e-06	2.1e-09	8.46e-07	7.4e-10	6.98e-10	4.9e-07	3.15e-07
H13	1.1e-06	1.85e-05	1.75e-06	2e-06	0.000295	1.43e-07	1.18e-05	1.25e-07	3.89e-06	1.23e-07	3.87e-06	9.41e-06	0.000256	1.49e-08	3.29e-06	1.39e-08	6.97e-09	2.76e-07	2.47e-06
H14	3.63e-06	7.98e-08	3.41e-07	1.26e-05	1.07e-08	0.000302	2.9e-09	1.88e-05	8.59e-09	3.23e-06	1.05e-06	2.1e-09	1.49e-08	0.000261	8.04e-10	2.32e-06	4.31e-06	2.63e-10	8.8e-09
H15	1.32e-07	4.61e-06	5.24e-07	6.09e-08	1.26e-05	7.17e-09	0.000301	3.56e-09	1.84e-05	9.77e-09	1.5e-07	8.46e-07	3.29e-06	8.04e-10	0.00026	6.37e-10	2.61e-10	2.32e-06	4.25e-06
H16	7.02e-07	3.78e-08	2.91e-07	4.04e-06	1.13e-08	1.92e-05	2.74e-09	0.000309	6.6e-09	2.97e-07	4.96e-07	7.4e-10	1.39e-08	2.32e-06	6.37e-10	0.000261	1.07e-05	4.27e-10	9.95e-09
H17	7.99e-07	2.83e-08	1.55e-07	4.04e-06	5.04e-09	1.93e-05	1.78e-09	0.000307	3.75e-09	2.57e-06	3.32e-07	6.98e-10	6.97e-09	4.31e-06	2.61e-10	1.07e-05	0.000262	2.02e-10	4.89e-09
H18	1.9e-08	9.96e-07	2.17e-07	6.23e-08	4e-06	4.41e-09	1.92e-05	5.18e-09	0.000309	9.13e-09	1.9e-07	4.9e-07	2.76e-07	2.63e-10	2.32e-06	4.27e-10	2.02e-10	0.000261	1.06e-05
H19	3.89e-07	7.93e-07	4.44e-07	2.08e-06	3.87e-06	1.63e-07	1.94e-05	1.1e-07	0.000306	2.97e-07	3.62e-06	3.15e-07	2.47e-06	8.8e-09	4.25e-06	9.95e-09	4.89e-09	1.06e-05	0.000264
Weighted LDM — diallyl_trisulfide_28_LIDI_matrix (× 0.00148844)
	S1	S2	S3	C4	C5	C6	C7	C8	C9	H10	H11	H12	H13	H14	H15	H16	H17	H18	H19	Total
S1	0.021765	0.000112	0.000977	0.000787	7.42e-06	6.2e-05	1.79e-06	3.09e-05	1.3e-06	4.35e-05	3.88e-05	8.39e-06	8.95e-07	4.99e-06	4.72e-07	2.16e-06	1.49e-06	1.02e-07	8.06e-08	0.139914
S2	0.000112	0.021755	0.000967	4.9e-06	0.000783	9.92e-06	6.36e-05	1.89e-06	3.12e-05	8.03e-07	1.7e-06	4.3e-05	4.26e-05	2.02e-05	8.48e-06	1.76e-07	4.27e-07	1.87e-06	1.64e-06
S3	0.000977	0.000967	0.021731	5.72e-05	5.65e-05	6.43e-06	1.36e-05	2.73e-06	7.51e-06	1.77e-05	1.1e-05	4.61e-06	1.59e-05	4.43e-06	4.94e-07	3.17e-07	4.15e-07	3.56e-07	7.12e-07
C4	0.000787	4.9e-06	5.72e-05	0.005977	8.05e-07	0.000768	1.35e-07	5.57e-05	1.04e-07	0.000687	0.000691	3.17e-07	1.95e-07	2.84e-05	1.44e-08	9.46e-06	9.65e-06	6.32e-09	1.11e-08
C5	7.42e-06	0.000783	5.65e-05	8.05e-07	0.005974	2.85e-07	0.000767	8.55e-08	5.59e-05	2.5e-07	1.53e-07	0.00069	0.000689	7.47e-07	2.93e-05	5.82e-09	1.72e-08	9.44e-06	9.46e-06
C6	6.2e-05	9.92e-06	6.43e-06	0.000768	2.85e-07	0.005916	3.94e-08	0.001375	4.17e-08	2.81e-05	2.74e-05	1.09e-07	1.04e-07	0.000696	8.13e-09	4.52e-05	4.58e-05	4.44e-09	2.29e-09
C7	1.79e-06	6.36e-05	1.36e-05	1.35e-07	0.000767	3.94e-08	0.005921	1.66e-08	0.001371	4.56e-08	4.97e-08	2.7e-05	2.78e-05	6.11e-08	0.000705	1.29e-09	2.96e-09	4.49e-05	4.49e-05
C8	3.09e-05	1.89e-06	2.73e-06	5.57e-05	8.55e-08	0.001375	1.66e-08	0.00608	8.89e-09	1.39e-05	9.91e-06	2.06e-08	3.68e-08	4.22e-05	1.45e-09	0.00072	0.000717	1.02e-09	5.24e-10
C9	1.3e-06	3.12e-05	7.51e-06	1.04e-07	5.59e-05	4.17e-08	0.001371	8.89e-09	0.006073	2.81e-08	3.96e-08	9.52e-06	1.33e-05	6.99e-08	4.37e-05	1e-09	3e-09	0.000715	0.00072
H10	4.35e-05	8.03e-07	1.77e-05	0.000687	2.5e-07	2.81e-05	4.56e-08	1.39e-05	2.81e-08	0.000574	2.13e-05	1.28e-07	3.88e-08	1.68e-06	2.85e-09	1.13e-06	6.71e-07	1.83e-09	3.78e-09
H11	3.88e-05	1.7e-06	1.1e-05	0.000691	1.53e-07	2.74e-05	4.97e-08	9.91e-06	3.96e-08	2.13e-05	0.000593	3.82e-08	3.4e-08	7.47e-06	7.6e-09	7.35e-07	6.7e-06	2.14e-09	3.38e-09
H12	8.39e-06	4.3e-05	4.61e-06	3.17e-07	0.00069	1.09e-07	2.7e-05	2.06e-08	9.52e-06	1.28e-07	3.82e-08	0.000586	2.19e-05	7.57e-08	7.42e-06	2.55e-09	3.16e-09	5.97e-06	6.93e-07
H13	8.95e-07	4.26e-05	1.59e-05	1.95e-07	0.000689	1.04e-07	2.78e-05	3.68e-08	1.33e-05	3.88e-08	3.4e-08	2.19e-05	0.00058	2.81e-07	2.46e-06	3.62e-09	6.53e-09	7.77e-07	1.19e-06
H14	4.99e-06	2.02e-05	4.43e-06	2.84e-05	7.47e-07	0.000696	6.11e-08	4.22e-05	6.99e-08	1.68e-06	7.47e-06	7.57e-08	2.81e-07	0.00059	9.89e-09	5.3e-06	9.73e-06	5.31e-09	2.4e-09
H15	4.72e-07	8.48e-06	4.94e-07	1.44e-08	2.93e-05	8.13e-09	0.000705	1.45e-09	4.37e-05	2.85e-09	7.6e-09	7.42e-06	2.46e-06	9.89e-09	0.000609	2.54e-10	4.92e-10	1e-05	5.4e-06
H16	2.16e-06	1.76e-07	3.17e-07	9.46e-06	5.82e-09	4.52e-05	1.29e-09	0.00072	1e-09	1.13e-06	7.35e-07	2.55e-09	3.62e-09	5.3e-06	2.54e-10	0.000612	2.53e-05	1.82e-10	8.86e-11
H17	1.49e-06	4.27e-07	4.15e-07	9.65e-06	1.72e-08	4.58e-05	2.96e-09	0.000717	3e-09	6.71e-07	6.7e-06	3.16e-09	6.53e-09	9.73e-06	4.92e-10	2.53e-05	0.000621	2.04e-10	1.76e-10
H18	1.02e-07	1.87e-06	3.56e-07	6.32e-09	9.44e-06	4.44e-09	4.49e-05	1.02e-09	0.000715	1.83e-09	2.14e-09	5.97e-06	7.77e-07	5.31e-09	1e-05	1.82e-10	2.04e-10	0.00061	2.49e-05
H19	8.06e-08	1.64e-06	7.12e-07	1.11e-08	9.46e-06	2.29e-09	4.49e-05	5.24e-10	0.00072	3.78e-09	3.38e-09	6.93e-07	1.19e-06	2.4e-09	5.4e-06	8.86e-11	1.76e-10	2.49e-05	0.000608
Weighted LDM — diallyl_trisulfide_29_LIDI_matrix (× 0.000663517)
	S1	S2	S3	C4	C5	C6	C7	C8	C9	H10	H11	H12	H13	H14	H15	H16	H17	H18	H19	Total
S1	0.009702	5.01e-05	0.000435	0.00035	3.56e-06	2.75e-05	7.38e-07	1.38e-05	6.5e-07	1.94e-05	1.73e-05	4.05e-07	5.16e-06	2.17e-06	9.96e-08	9.64e-07	6.62e-07	3.53e-08	4.11e-08	0.06237
S2	5.01e-05	0.009698	0.00043	2.2e-06	0.000349	4.6e-06	2.83e-05	8.72e-07	1.38e-05	3.51e-07	7.59e-07	1.95e-05	1.86e-05	9.29e-06	3.84e-06	8.13e-08	1.95e-07	8.38e-07	7.32e-07
S3	0.000435	0.00043	0.009689	2.55e-05	2.52e-05	2.86e-06	6.18e-06	1.22e-06	3.32e-06	7.74e-06	4.94e-06	3.3e-06	4.69e-06	1.95e-06	3.46e-07	1.41e-07	1.84e-07	1.61e-07	3.14e-07
C4	0.00035	2.2e-06	2.55e-05	0.002664	3.69e-07	0.000342	5.41e-08	2.48e-05	4.92e-08	0.000306	0.000308	5.76e-08	2.02e-07	1.27e-05	8.86e-09	4.22e-06	4.3e-06	2.49e-09	3.79e-09
C5	3.56e-06	0.000349	2.52e-05	3.69e-07	0.002663	1.35e-07	0.000342	3.97e-08	2.49e-05	1.11e-07	6.82e-08	0.000309	0.000306	3.47e-07	1.3e-05	2.7e-09	7.92e-09	4.2e-06	4.21e-06
C6	2.75e-05	4.6e-06	2.86e-06	0.000342	1.35e-07	0.002637	2.02e-08	0.000613	1.35e-08	1.25e-05	1.22e-05	5.49e-08	4.83e-08	0.00031	8.88e-09	2.02e-05	2.04e-05	1.41e-09	7.96e-10
C7	7.38e-07	2.83e-05	6.18e-06	5.41e-08	0.000342	2.02e-08	0.00264	8.16e-09	0.000611	2.22e-08	1.43e-08	1.2e-05	1.25e-05	2.94e-08	0.000314	7.53e-10	1.11e-09	2e-05	2e-05
C8	1.38e-05	8.72e-07	1.22e-06	2.48e-05	3.97e-08	0.000613	8.16e-09	0.00271	3.38e-09	6.2e-06	4.42e-06	1.33e-08	8.91e-09	1.88e-05	2.96e-09	0.000321	0.00032	3.09e-10	2.64e-10
C9	6.5e-07	1.38e-05	3.32e-06	4.92e-08	2.49e-05	1.35e-08	0.000611	3.38e-09	0.002707	1.74e-08	1.19e-08	4.23e-06	5.92e-06	1.17e-08	1.95e-05	2.34e-10	6.49e-10	0.000319	0.000321
H10	1.94e-05	3.51e-07	7.74e-06	0.000306	1.11e-07	1.25e-05	2.22e-08	6.2e-06	1.74e-08	0.000256	9.48e-06	1.05e-08	7.54e-08	7.54e-07	2.39e-09	5.07e-07	2.99e-07	1.03e-09	1.77e-09
H11	1.73e-05	7.59e-07	4.94e-06	0.000308	6.82e-08	1.22e-05	1.43e-08	4.42e-06	1.19e-08	9.48e-06	0.000264	1.43e-08	2.5e-08	3.33e-06	1.53e-09	3.28e-07	2.98e-06	6.43e-10	1.01e-09
H12	4.05e-07	1.95e-05	3.3e-06	5.76e-08	0.000309	5.49e-08	1.2e-05	1.33e-08	4.23e-06	1.05e-08	1.43e-08	0.000263	9.74e-06	1.44e-07	3.34e-06	1.3e-09	3.26e-09	2.65e-06	3.06e-07
H13	5.16e-06	1.86e-05	4.69e-06	2.02e-07	0.000306	4.83e-08	1.25e-05	8.91e-09	5.92e-06	7.54e-08	2.5e-08	9.74e-06	0.000256	2.03e-08	1.1e-06	1.09e-09	1.22e-09	3.48e-07	5.28e-07
H14	2.17e-06	9.29e-06	1.95e-06	1.27e-05	3.47e-07	0.00031	2.94e-08	1.88e-05	1.17e-08	7.54e-07	3.33e-06	1.44e-07	2.03e-08	0.000263	1.57e-08	2.36e-06	4.34e-06	2.21e-09	6.11e-10
H15	9.96e-08	3.84e-06	3.46e-07	8.86e-09	1.3e-05	8.88e-09	0.000314	2.96e-09	1.95e-05	2.39e-09	1.53e-09	3.34e-06	1.1e-06	1.57e-08	0.000271	3.75e-10	1.95e-10	4.48e-06	2.41e-06
H16	9.64e-07	8.13e-08	1.41e-07	4.22e-06	2.7e-09	2.02e-05	7.53e-10	0.000321	2.34e-10	5.07e-07	3.28e-07	1.3e-09	1.09e-09	2.36e-06	3.75e-10	0.000273	1.13e-05	3.53e-11	2.66e-11
H17	6.62e-07	1.95e-07	1.84e-07	4.3e-06	7.92e-09	2.04e-05	1.11e-09	0.00032	6.49e-10	2.99e-07	2.98e-06	3.26e-09	1.22e-09	4.34e-06	1.95e-10	1.13e-05	0.000277	5.06e-11	4.87e-11
H18	3.53e-08	8.38e-07	1.61e-07	2.49e-09	4.2e-06	1.41e-09	2e-05	3.09e-10	0.000319	1.03e-09	6.43e-10	2.65e-06	3.48e-07	2.21e-09	4.48e-06	3.53e-11	5.06e-11	0.000272	1.11e-05
H19	4.11e-08	7.32e-07	3.14e-07	3.79e-09	4.21e-06	7.96e-10	2e-05	2.64e-10	0.000321	1.77e-09	1.01e-09	3.06e-07	5.28e-07	6.11e-10	2.41e-06	2.66e-11	4.87e-11	1.11e-05	0.000271
Weighted LDM — diallyl_trisulfide_30_LIDI_matrix (× 0.000554912)
	S1	S2	S3	C4	C5	C6	C7	C8	C9	H10	H11	H12	H13	H14	H15	H16	H17	H18	H19	Total
S1	0.008113	4.21e-05	0.000364	0.000293	3.15e-06	2.3e-05	4.7e-07	1.15e-05	2.22e-07	1.45e-05	1.62e-05	4.51e-06	4.37e-07	1.82e-06	2.27e-07	8.06e-07	5.54e-07	2.25e-08	2.33e-08	0.052161
S2	4.21e-05	0.008111	0.00036	1.85e-06	0.000294	3.79e-06	2.3e-05	7.23e-07	1.17e-05	6.41e-07	2.95e-07	1.63e-05	1.44e-05	7.69e-06	2.03e-06	6.76e-08	1.62e-07	5.32e-07	8.38e-07
S3	0.000364	0.00036	0.008097	2.12e-05	2.06e-05	2.37e-06	4.88e-06	1.02e-06	9.56e-07	4.1e-06	6.5e-06	3.32e-06	4.71e-06	1.62e-06	6.51e-06	1.17e-07	1.53e-07	2.45e-07	1.12e-07
C4	0.000293	1.85e-06	2.12e-05	0.002228	2.91e-07	0.000286	6.7e-08	2.08e-05	2.82e-08	0.000258	0.000256	1.71e-07	2.89e-08	1.06e-05	9.96e-08	3.53e-06	3.6e-06	5.09e-09	3.46e-09
C5	3.15e-06	0.000294	2.06e-05	2.91e-07	0.002228	9.99e-08	0.000286	3.09e-08	2.07e-05	5.44e-08	9.43e-08	0.000256	0.000257	2.51e-07	1.06e-05	1.9e-09	5.66e-09	3.54e-06	3.51e-06
C6	2.3e-05	3.79e-06	2.37e-06	0.000286	9.99e-08	0.002206	4.49e-08	0.000513	3e-08	1.02e-05	1.05e-05	4.45e-08	8.49e-09	0.00026	7.61e-09	1.69e-05	1.7e-05	1.38e-09	2.4e-09
C7	4.7e-07	2.3e-05	4.88e-06	6.7e-08	0.000286	4.49e-08	0.002205	1.13e-08	0.000513	1.67e-08	1.17e-08	1.04e-05	1e-05	1.18e-07	0.000261	1.38e-09	2.97e-09	1.7e-05	1.69e-05
C8	1.15e-05	7.23e-07	1.02e-06	2.08e-05	3.09e-08	0.000513	1.13e-08	0.002267	7.86e-09	3.7e-06	5.18e-06	7.97e-09	4.47e-09	1.57e-05	5.53e-09	0.000269	0.000267	8.39e-10	8.28e-10
C9	2.22e-07	1.17e-05	9.56e-07	2.82e-08	2.07e-05	3e-08	0.000513	7.86e-09	0.002265	8e-09	4.31e-09	5.11e-06	3.6e-06	7.99e-08	1.6e-05	8.81e-10	2.46e-09	0.000267	0.000268
H10	1.45e-05	6.41e-07	4.1e-06	0.000258	5.44e-08	1.02e-05	1.67e-08	3.7e-06	8e-09	0.000221	7.92e-06	2.27e-08	7.75e-09	2.78e-06	1.82e-08	2.74e-07	2.49e-06	1.33e-09	1.26e-09
H11	1.62e-05	2.95e-07	6.5e-06	0.000256	9.43e-08	1.05e-05	1.17e-08	5.18e-06	4.31e-09	7.92e-06	0.000214	6.25e-08	1.6e-08	6.31e-07	1.23e-08	4.23e-07	2.5e-07	1.01e-09	7.33e-10
H12	4.51e-06	1.63e-05	3.32e-06	1.71e-07	0.000256	4.45e-08	1.04e-05	7.97e-09	5.11e-06	2.27e-08	6.25e-08	0.000214	8.01e-06	1.81e-08	5.94e-07	9.97e-10	1.06e-09	2.48e-07	4.21e-07
H13	4.37e-07	1.44e-05	4.71e-06	2.89e-08	0.000257	8.49e-09	1e-05	4.47e-09	3.6e-06	7.75e-09	1.6e-08	8.01e-06	0.000221	7.88e-09	2.82e-06	2.82e-10	4.77e-10	2.4e-06	2.71e-07
H14	1.82e-06	7.69e-06	1.62e-06	1.06e-05	2.51e-07	0.00026	1.18e-07	1.57e-05	7.99e-08	2.78e-06	6.31e-07	1.81e-08	7.88e-09	0.00022	6.17e-09	1.98e-06	3.63e-06	2.81e-09	6.65e-09
H15	2.27e-07	2.03e-06	6.51e-06	9.96e-08	1.06e-05	7.61e-09	0.000261	5.53e-09	1.6e-05	1.82e-08	1.23e-08	5.94e-07	2.82e-06	6.17e-09	0.000223	1.04e-09	1.01e-09	3.67e-06	2e-06
H16	8.06e-07	6.76e-08	1.17e-07	3.53e-06	1.9e-09	1.69e-05	1.38e-09	0.000269	8.81e-10	2.74e-07	4.23e-07	9.97e-10	2.82e-10	1.98e-06	1.04e-09	0.000228	9.43e-06	7.7e-11	5.89e-11
H17	5.54e-07	1.62e-07	1.53e-07	3.6e-06	5.66e-09	1.7e-05	2.97e-09	0.000267	2.46e-09	2.49e-06	2.5e-07	1.06e-09	4.77e-10	3.63e-06	1.01e-09	9.43e-06	0.000231	1.29e-10	1.83e-10
H18	2.25e-08	5.32e-07	2.45e-07	5.09e-09	3.54e-06	1.38e-09	1.7e-05	8.39e-10	0.000267	1.33e-09	1.01e-09	2.48e-07	2.4e-06	2.81e-09	3.67e-06	7.7e-11	1.29e-10	0.000231	9.43e-06
H19	2.33e-08	8.38e-07	1.12e-07	3.46e-09	3.51e-06	2.4e-09	1.69e-05	8.28e-10	0.000268	1.26e-09	7.33e-10	4.21e-07	2.71e-07	6.65e-09	2e-06	5.89e-11	1.83e-10	9.43e-06	0.000228
Weighted LDM — diallyl_trisulfide_31_LIDI_matrix (× 0.0085616)
	S1	S2	S3	C4	C5	C6	C7	C8	C9	H10	H11	H12	H13	H14	H15	H16	H17	H18	H19	Total
S1	0.125127	0.000638	0.005608	0.004522	2.8e-05	0.000358	5.34e-05	0.000177	1.04e-05	0.000223	0.000249	4.74e-06	9.73e-06	2.99e-05	0.000113	1.24e-05	8.6e-06	2.42e-06	9.76e-07	0.804782
S2	0.000638	0.125126	0.005607	2.81e-05	0.00452	5.33e-05	0.000358	1.04e-05	0.000177	9.73e-06	4.73e-06	0.000249	0.000223	0.000113	2.98e-05	9.76e-07	2.42e-06	8.6e-06	1.24e-05
S3	0.005608	0.005607	0.124929	0.000328	0.000328	3.57e-05	3.58e-05	1.58e-05	1.58e-05	6.25e-05	0.000106	0.000106	6.25e-05	2.3e-05	2.31e-05	1.86e-06	2.34e-06	2.34e-06	1.86e-06
C4	0.004522	2.81e-05	0.000328	0.034384	4.44e-06	0.004417	1.64e-06	0.000321	4.82e-07	0.003975	0.003948	1.25e-06	1.03e-06	0.000164	4.55e-06	5.44e-05	5.56e-05	1.06e-07	3.2e-08
C5	2.8e-05	0.00452	0.000328	4.44e-06	0.034382	1.64e-06	0.004416	4.82e-07	0.000321	1.03e-06	1.25e-06	0.003948	0.003975	4.54e-06	0.000164	3.2e-08	1.06e-07	5.56e-05	5.44e-05
C6	0.000358	5.33e-05	3.57e-05	0.004417	1.64e-06	0.034031	1.16e-06	0.007908	2.57e-07	0.000158	0.000161	6.2e-07	1.75e-07	0.004006	1.14e-06	0.00026	0.000263	2.63e-08	2.27e-08
C7	5.34e-05	0.000358	3.58e-05	1.64e-06	0.004416	1.16e-06	0.03403	2.57e-07	0.007908	1.75e-07	6.21e-07	0.000161	0.000158	1.14e-06	0.004006	2.27e-08	2.63e-08	0.000263	0.00026
C8	0.000177	1.04e-05	1.58e-05	0.000321	4.82e-07	0.007908	2.57e-07	0.034969	5.59e-08	5.7e-05	8.03e-05	2.39e-07	5.84e-08	0.000242	3.36e-07	0.004142	0.004125	9.37e-09	8.89e-09
C9	1.04e-05	0.000177	1.58e-05	4.82e-07	0.000321	2.57e-07	0.007908	5.59e-08	0.03497	5.84e-08	2.39e-07	8.03e-05	5.7e-05	3.37e-07	0.000242	8.89e-09	9.37e-09	0.004125	0.004142
H10	0.000223	9.73e-06	6.25e-05	0.003975	1.03e-06	0.000158	1.75e-07	5.7e-05	5.84e-08	0.00341	0.000122	1.99e-07	4.02e-07	4.3e-05	2.43e-07	4.22e-06	3.85e-05	1.8e-08	3.63e-09
H11	0.000249	4.73e-06	0.000106	0.003948	1.25e-06	0.000161	6.21e-07	8.03e-05	2.39e-07	0.000122	0.003293	2.33e-07	1.99e-07	9.59e-06	1.59e-06	6.5e-06	3.85e-06	3.71e-08	2.22e-08
H12	4.74e-06	0.000249	0.000106	1.25e-06	0.003948	6.2e-07	0.000161	2.39e-07	8.03e-05	1.99e-07	2.33e-07	0.003293	0.000122	1.59e-06	9.6e-06	2.22e-08	3.71e-08	3.85e-06	6.5e-06
H13	9.73e-06	0.000223	6.25e-05	1.03e-06	0.003975	1.75e-07	0.000158	5.84e-08	5.7e-05	4.02e-07	1.99e-07	0.000122	0.00341	2.43e-07	4.3e-05	3.63e-09	1.8e-08	3.85e-05	4.22e-06
H14	2.99e-05	0.000113	2.3e-05	0.000164	4.54e-06	0.004006	1.14e-06	0.000242	3.37e-07	4.3e-05	9.59e-06	1.59e-06	2.43e-07	0.003394	2.05e-07	3.05e-05	5.6e-05	1.7e-08	1.95e-08
H15	0.000113	2.98e-05	2.31e-05	4.55e-06	0.000164	1.14e-06	0.004006	3.36e-07	0.000242	2.43e-07	1.59e-06	9.6e-06	4.3e-05	2.05e-07	0.003394	1.95e-08	1.7e-08	5.6e-05	3.05e-05
H16	1.24e-05	9.76e-07	1.86e-06	5.44e-05	3.2e-08	0.00026	2.27e-08	0.004142	8.89e-09	4.22e-06	6.5e-06	2.22e-08	3.63e-09	3.05e-05	1.95e-08	0.003514	0.000145	9.06e-10	1.11e-09
H17	8.6e-06	2.42e-06	2.34e-06	5.56e-05	1.06e-07	0.000263	2.63e-08	0.004125	9.37e-09	3.85e-05	3.85e-06	3.71e-08	1.8e-08	5.6e-05	1.7e-08	0.000145	0.003574	1.34e-09	9.05e-10
H18	2.42e-06	8.6e-06	2.34e-06	1.06e-07	5.56e-05	2.63e-08	0.000263	9.37e-09	0.004125	1.8e-08	3.71e-08	3.85e-06	3.85e-05	1.7e-08	5.6e-05	9.06e-10	1.34e-09	0.003573	0.000145
H19	9.76e-07	1.24e-05	1.86e-06	3.2e-08	5.44e-05	2.27e-08	0.00026	8.89e-09	0.004142	3.63e-09	2.22e-08	6.5e-06	4.22e-06	1.95e-08	3.05e-05	1.11e-09	9.05e-10	0.000145	0.003514
Weighted LDM — diallyl_trisulfide_32_LIDI_matrix (× 0.00264092)
	S1	S2	S3	C4	C5	C6	C7	C8	C9	H10	H11	H12	H13	H14	H15	H16	H17	H18	H19	Total
S1	0.038595	0.000207	0.001727	0.00139	8.59e-06	0.000114	3.38e-06	5.53e-05	2.63e-06	7.71e-05	7.41e-05	2.89e-06	2.19e-06	1.63e-05	6.15e-07	2.9e-06	3.31e-06	1.45e-07	1.74e-07	0.24824
S2	0.000207	0.038595	0.001727	8.59e-06	0.001389	3.38e-06	0.000114	2.63e-06	5.53e-05	2.88e-06	2.19e-06	7.71e-05	7.41e-05	6.14e-07	1.63e-05	1.74e-07	1.45e-07	3.31e-06	2.9e-06
S3	0.001727	0.001727	0.038554	0.0001	0.0001	2.24e-05	2.24e-05	1.25e-05	1.25e-05	6.21e-06	3.23e-05	6.21e-06	3.23e-05	8.09e-07	8.09e-07	1.25e-06	5.91e-07	5.91e-07	1.25e-06
C4	0.00139	8.59e-06	0.0001	0.010591	5.52e-06	0.001362	6.91e-07	9.9e-05	2.34e-07	0.001225	0.00122	8.58e-06	1.41e-06	5.18e-05	1.5e-07	1.68e-05	1.68e-05	2.94e-08	3.09e-08
C5	8.59e-06	0.001389	0.0001	5.52e-06	0.010591	6.92e-07	0.001362	2.34e-07	9.91e-05	8.6e-06	1.41e-06	0.001225	0.00122	1.51e-07	5.16e-05	3.09e-08	2.94e-08	1.68e-05	1.68e-05
C6	0.000114	3.38e-06	2.24e-05	0.001362	6.92e-07	0.010505	1.09e-07	0.002431	3.19e-08	4.86e-05	4.91e-05	9.89e-07	1.41e-07	0.001249	3.05e-08	7.95e-05	8e-05	4.9e-09	2.44e-09
C7	3.38e-06	0.000114	2.24e-05	6.91e-07	0.001362	1.09e-07	0.010505	3.19e-08	0.002431	9.91e-07	1.41e-07	4.86e-05	4.91e-05	3.05e-08	0.001249	2.44e-09	4.9e-09	8e-05	7.95e-05
C8	5.53e-05	2.63e-06	1.25e-05	9.9e-05	2.34e-07	0.002431	3.19e-08	0.010776	2.01e-08	1.73e-05	2.42e-05	1.89e-07	1.25e-07	7.68e-05	1.37e-08	0.001276	0.00127	4.47e-09	1.63e-09
C9	2.63e-06	5.53e-05	1.25e-05	2.34e-07	9.91e-05	3.19e-08	0.002431	2.01e-08	0.010777	1.89e-07	1.25e-07	1.73e-05	2.42e-05	1.37e-08	7.69e-05	1.63e-09	4.47e-09	0.00127	0.001276
H10	7.71e-05	2.88e-06	6.21e-06	0.001225	8.6e-06	4.86e-05	9.91e-07	1.73e-05	1.89e-07	0.001064	3.97e-05	1.38e-05	5.08e-07	1.32e-05	3.67e-07	1.26e-06	1.1e-05	6.63e-08	1.46e-08
H11	7.41e-05	2.19e-06	3.23e-05	0.00122	1.41e-06	4.91e-05	1.41e-07	2.42e-05	1.25e-07	3.97e-05	0.001028	5.06e-07	1.35e-06	4.29e-06	9.36e-09	2.09e-06	1.41e-06	5.65e-09	8.15e-09
H12	2.89e-06	7.71e-05	6.21e-06	8.58e-06	0.001225	9.89e-07	4.86e-05	1.89e-07	1.73e-05	1.38e-05	5.06e-07	0.001064	3.97e-05	3.67e-07	1.32e-05	1.46e-08	6.63e-08	1.1e-05	1.26e-06
H13	2.19e-06	7.41e-05	3.23e-05	1.41e-06	0.00122	1.41e-07	4.91e-05	1.25e-07	2.42e-05	5.08e-07	1.35e-06	3.97e-05	0.001028	9.4e-09	4.29e-06	8.15e-09	5.65e-09	1.41e-06	2.09e-06
H14	1.63e-05	6.14e-07	8.09e-07	5.18e-05	1.51e-07	0.001249	3.05e-08	7.68e-05	1.37e-08	1.32e-05	4.29e-06	3.67e-07	9.4e-09	0.001075	8.3e-09	9.53e-06	1.78e-05	1.49e-09	9.86e-10
H15	6.15e-07	1.63e-05	8.09e-07	1.5e-07	5.16e-05	3.05e-08	0.001249	1.37e-08	7.69e-05	3.67e-07	9.36e-09	1.32e-05	4.29e-06	8.3e-09	0.001075	9.86e-10	1.49e-09	1.78e-05	9.53e-06
H16	2.9e-06	1.74e-07	1.25e-06	1.68e-05	3.09e-08	7.95e-05	2.44e-09	0.001276	1.63e-09	1.26e-06	2.09e-06	1.46e-08	8.15e-09	9.53e-06	9.86e-10	0.001077	4.42e-05	2.6e-10	1.38e-10
H17	3.31e-06	1.45e-07	5.91e-07	1.68e-05	2.94e-08	8e-05	4.9e-09	0.00127	4.47e-09	1.1e-05	1.41e-06	6.63e-08	5.65e-09	1.78e-05	1.49e-09	4.42e-05	0.001088	8.84e-10	2.6e-10
H18	1.45e-07	3.31e-06	5.91e-07	2.94e-08	1.68e-05	4.9e-09	8e-05	4.47e-09	0.00127	6.63e-08	5.65e-09	1.1e-05	1.41e-06	1.49e-09	1.78e-05	2.6e-10	8.84e-10	0.001088	4.42e-05
H19	1.74e-07	2.9e-06	1.25e-06	3.09e-08	1.68e-05	2.44e-09	7.95e-05	1.63e-09	0.001276	1.46e-08	8.15e-09	1.26e-06	2.09e-06	9.86e-10	9.53e-06	1.38e-10	2.6e-10	4.42e-05	0.001077
Weighted LDM — diallyl_trisulfide_33_LIDI_matrix (× 0.0019056)
	S1	S2	S3	C4	C5	C6	C7	C8	C9	H10	H11	H12	H13	H14	H15	H16	H17	H18	H19	Total
S1	0.027875	0.000145	0.00124	0.001003	1.15e-05	7.75e-05	1.86e-06	4.44e-05	1.41e-06	5.43e-05	5.13e-05	1.62e-05	1.16e-06	1.19e-05	3.23e-07	2.52e-06	2.95e-06	1.81e-07	1.09e-06	0.179126
S2	0.000145	0.027836	0.001235	1.14e-05	0.001016	1.86e-06	5.85e-05	1.48e-06	4.11e-05	1.56e-05	1.58e-06	5.5e-05	5.49e-05	5.62e-07	1.35e-05	1.63e-06	9.71e-08	2.77e-06	3.85e-05
S3	0.00124	0.001235	0.027775	7.14e-05	7.45e-05	2.84e-05	1.62e-05	2.63e-05	4.7e-06	8.37e-06	1.66e-05	8.66e-06	1.74e-05	9.63e-07	3.06e-06	4.69e-06	7.15e-07	5.32e-07	3.63e-06
C4	0.001003	1.14e-05	7.14e-05	0.00765	1.08e-06	0.000986	1.31e-07	7.04e-05	7.15e-08	0.000879	0.000885	4.54e-07	2.89e-07	3.81e-05	4.77e-08	1.2e-05	1.2e-05	8.21e-09	4.75e-08
C5	1.15e-05	0.001016	7.45e-05	1.08e-06	0.007665	4.59e-07	0.000982	3.24e-07	6.75e-05	4.93e-07	9.11e-08	0.000878	0.000878	2.32e-08	3.88e-05	1.43e-07	9.59e-09	1.25e-05	8.5e-06
C6	7.75e-05	1.86e-06	2.84e-05	0.000986	4.59e-07	0.00756	1.03e-07	0.001747	2.01e-08	3.44e-05	3.63e-05	2.64e-07	6.19e-08	0.000902	2.8e-08	5.72e-05	5.76e-05	4.24e-09	1.12e-08
C7	1.86e-06	5.85e-05	1.62e-05	1.31e-07	0.000982	1.03e-07	0.007592	6.5e-08	0.001768	5.81e-08	2.43e-08	3.77e-05	3.77e-05	5.44e-09	0.000902	9.81e-09	1.47e-09	5.91e-05	5.67e-05
C8	4.44e-05	1.48e-06	2.63e-05	7.04e-05	3.24e-07	0.001747	6.5e-08	0.007768	1.42e-08	1.18e-05	1.69e-05	2.18e-07	3.94e-08	5.54e-05	1.76e-08	0.000915	0.000922	2.6e-09	4.94e-09
C9	1.41e-06	4.11e-05	4.7e-06	7.15e-08	6.75e-05	2.01e-08	0.001768	1.42e-08	0.007776	4.76e-08	9.58e-09	1.82e-05	2.18e-05	3.98e-09	5.65e-05	6.69e-09	1.08e-09	0.000921	0.000905
H10	5.43e-05	1.56e-05	8.37e-06	0.000879	4.93e-07	3.44e-05	5.81e-08	1.18e-05	4.76e-08	0.00074	2.78e-05	1.15e-07	2.15e-07	9.58e-06	1.34e-08	7.72e-06	8.46e-07	3.38e-09	3.99e-08
H11	5.13e-05	1.58e-06	1.66e-05	0.000885	9.11e-08	3.63e-05	2.43e-08	1.69e-05	9.58e-09	2.78e-05	0.000757	2.59e-08	4.83e-08	2.91e-06	4.21e-09	9.34e-07	1.51e-06	6.73e-10	5.99e-09
H12	1.62e-05	5.5e-05	8.66e-06	4.54e-07	0.000878	2.64e-07	3.77e-05	2.18e-07	1.82e-05	1.15e-07	2.59e-08	0.00074	2.86e-05	1.96e-08	3.2e-06	1.58e-08	1.36e-08	1.35e-06	1e-06
H13	1.16e-06	5.49e-05	1.74e-05	2.89e-07	0.000878	6.19e-08	3.77e-05	3.94e-08	2.18e-05	2.15e-07	4.83e-08	2.86e-05	0.000739	4.17e-09	1.89e-06	4.24e-08	1.88e-09	1.35e-06	1.12e-06
H14	1.19e-05	5.62e-07	9.63e-07	3.81e-05	2.32e-08	0.000902	5.44e-09	5.54e-05	3.98e-09	9.58e-06	2.91e-06	1.96e-08	4.17e-09	0.000785	1.09e-09	1.28e-05	6.93e-06	5.94e-10	3.48e-09
H15	3.23e-07	1.35e-05	3.06e-06	4.77e-08	3.88e-05	2.8e-08	0.000902	1.76e-08	5.65e-05	1.34e-08	4.21e-09	3.2e-06	1.89e-06	1.09e-09	0.000788	5.8e-09	4.31e-10	7.72e-06	1.26e-05
H16	2.52e-06	1.63e-06	4.69e-06	1.2e-05	1.43e-07	5.72e-05	9.81e-09	0.000915	6.69e-09	7.72e-06	9.34e-07	1.58e-08	4.24e-08	1.28e-05	5.8e-09	0.000782	3.19e-05	3.51e-10	2.78e-09
H17	2.95e-06	9.71e-08	7.15e-07	1.2e-05	9.59e-09	5.76e-05	1.47e-09	0.000922	1.08e-09	8.46e-07	1.51e-06	1.36e-08	1.88e-09	6.93e-06	4.31e-10	3.19e-05	0.000782	9.61e-11	2.65e-10
H18	1.81e-07	2.77e-06	5.32e-07	8.21e-09	1.25e-05	4.24e-09	5.91e-05	2.6e-09	0.000921	3.38e-09	6.73e-10	1.35e-06	1.35e-06	5.94e-10	7.72e-06	3.51e-10	9.61e-11	0.000782	3.07e-05
H19	1.09e-06	3.85e-05	3.63e-06	4.75e-08	8.5e-06	1.12e-08	5.67e-05	4.94e-09	0.000905	3.99e-08	5.99e-09	1e-06	1.12e-06	3.48e-09	1.26e-05	2.78e-09	2.65e-10	3.07e-05	0.000763
Weighted LDM — diallyl_trisulfide_34_LIDI_matrix (× 0.0189589)
	S1	S2	S3	C4	C5	C6	C7	C8	C9	H10	H11	H12	H13	H14	H15	H16	H17	H18	H19	Total
S1	0.277157	0.001446	0.012374	0.009967	0.000111	0.000804	1.74e-05	0.000395	1.24e-05	0.000544	0.000544	1.54e-05	0.00016	0.000107	1.73e-06	2.36e-05	2.08e-05	8.22e-07	1.04e-05	1.78211
S2	0.001446	0.276868	0.012196	0.000101	0.010221	2.23e-05	0.000624	1.51e-05	0.000367	1.14e-05	0.000122	0.000508	0.000549	6.37e-06	0.000158	1.38e-06	9.65e-07	3.01e-05	0.000392
S3	0.012374	0.012196	0.276692	0.000725	0.000719	0.000174	0.000175	9.64e-05	0.000175	0.000197	5.93e-05	0.000165	0.000124	6.27e-06	1.31e-05	4.58e-06	9.12e-06	5.11e-06	8.1e-05
C4	0.009967	0.000101	0.000725	0.076095	1.03e-05	0.009778	3.01e-06	0.000711	2.82e-06	0.008778	0.008789	9.14e-07	5.22e-06	0.000373	4.63e-07	0.00012	0.00012	9.08e-08	1.18e-06
C5	0.000111	0.010221	0.000719	1.03e-05	0.076295	1.42e-06	0.009709	1.08e-06	0.000659	2.98e-06	3.76e-06	0.008764	0.008714	1.72e-07	0.000389	7.24e-08	1.06e-07	0.000123	8.47e-05
C6	0.000804	2.23e-05	0.000174	0.009778	1.42e-06	0.075418	6.76e-07	0.01746	7.2e-07	0.000355	0.000344	2.31e-07	6.87e-07	0.008976	7.31e-08	0.000572	0.000572	2.28e-08	4.93e-07
C7	1.74e-05	0.000624	0.000175	3.01e-06	0.009709	6.76e-07	0.07561	5.96e-07	0.017595	4.28e-07	1.94e-06	0.000378	0.000365	6.14e-08	0.008983	3.62e-08	6e-08	0.000594	0.000558
C8	0.000395	1.51e-05	9.64e-05	0.000711	1.08e-06	0.01746	5.96e-07	0.077356	4.87e-07	0.00017	0.000121	9.64e-08	7.02e-07	0.000557	1.11e-07	0.009113	0.009165	1.65e-08	3.66e-07
C9	1.24e-05	0.000367	0.000175	2.82e-06	0.000659	7.2e-07	0.017595	4.87e-07	0.077281	2.71e-07	6.09e-07	0.000206	0.000171	4.38e-08	0.000568	3.05e-08	5.64e-08	0.009172	0.008959
H10	0.000544	1.14e-05	0.000197	0.008778	2.98e-06	0.000355	4.28e-07	0.00017	2.71e-07	0.00739	0.000279	5.79e-07	2.28e-06	3.12e-05	4.52e-08	9.9e-06	1.52e-05	1.1e-08	9.54e-08
H11	0.000544	0.000122	5.93e-05	0.008789	3.76e-06	0.000344	1.94e-06	0.000121	6.09e-07	0.000279	0.007467	2.77e-07	1.12e-06	9.45e-05	3.86e-07	7.61e-05	8.84e-06	3.87e-08	4.94e-07
H12	1.54e-05	0.000508	0.000165	9.14e-07	0.008764	2.31e-07	0.000378	9.64e-08	0.000206	5.79e-07	2.77e-07	0.007467	0.000284	2.9e-08	1.85e-05	1.07e-08	1.22e-08	1.34e-05	8.83e-06
H13	0.00016	0.000549	0.000124	5.22e-06	0.008714	6.87e-07	0.000365	7.02e-07	0.000171	2.28e-06	1.12e-06	0.000284	0.007295	1.82e-07	3.08e-05	5e-08	2.5e-08	1.32e-05	9.19e-06
H14	0.000107	6.37e-06	6.27e-06	0.000373	1.72e-07	0.008976	6.14e-08	0.000557	4.38e-08	3.12e-05	9.45e-05	2.9e-08	1.82e-07	0.007755	1.05e-08	0.000128	6.89e-05	3.06e-09	4.18e-08
H15	1.73e-06	0.000158	1.31e-05	4.63e-07	0.000389	7.31e-08	0.008983	1.11e-07	0.000568	4.52e-08	3.86e-07	1.85e-05	3.08e-05	1.05e-08	0.007908	5.04e-09	8.83e-09	7.52e-05	0.000126
H16	2.36e-05	1.38e-06	4.58e-06	0.00012	7.24e-08	0.000572	3.62e-08	0.009113	3.05e-08	9.9e-06	7.61e-05	1.07e-08	5e-08	0.000128	5.04e-09	0.007783	0.000318	1.35e-09	1.72e-08
H17	2.08e-05	9.65e-07	9.12e-06	0.00012	1.06e-07	0.000572	6e-08	0.009165	5.64e-08	1.52e-05	8.84e-06	1.22e-08	2.5e-08	6.89e-05	8.83e-09	0.000318	0.007751	1.85e-09	3.16e-08
H18	8.22e-07	3.01e-05	5.11e-06	9.08e-08	0.000123	2.28e-08	0.000594	1.65e-08	0.009172	1.1e-08	3.87e-08	1.34e-05	1.32e-05	3.06e-09	7.52e-05	1.35e-09	1.85e-09	0.007815	0.000302
H19	1.04e-05	0.000392	8.1e-05	1.18e-06	8.47e-05	4.93e-07	0.000558	3.66e-07	0.008959	9.54e-08	4.94e-07	8.83e-06	9.19e-06	4.18e-08	0.000126	1.72e-08	3.16e-08	0.000302	0.007437
Weighted LDM — diallyl_trisulfide_35_LIDI_matrix (× 0.0218149)
	S1	S2	S3	C4	C5	C6	C7	C8	C9	H10	H11	H12	H13	H14	H15	H16	H17	H18	H19	Total
S1	0.318907	0.00167	0.014208	0.011472	0.000135	0.000926	2e-05	0.000452	1.42e-05	0.000642	0.000608	1.79e-05	0.000201	0.000126	1.95e-06	2.75e-05	2.4e-05	9.59e-07	1.17e-05	2.05058
S2	0.00167	0.318547	0.014024	0.000127	0.011757	2.39e-05	0.000716	2.06e-05	0.000421	1.44e-05	0.000192	0.000583	0.000631	3.66e-06	0.000182	1.2e-06	1.35e-06	3.45e-05	0.000449
S3	0.014208	0.014024	0.318444	0.000833	0.000826	0.000203	0.0002	0.00011	0.000199	0.000108	0.000153	0.000191	0.00014	1.13e-05	1.51e-05	5.33e-06	1.04e-05	5.79e-06	9.17e-05
C4	0.011472	0.000127	0.000833	0.087551	1.24e-05	0.011248	3.5e-06	0.000818	3.27e-06	0.010151	0.01005	1.03e-06	6.56e-06	0.000429	5.68e-07	0.000138	0.000138	1.1e-07	1.43e-06
C5	0.000135	0.011757	0.000826	1.24e-05	0.087799	1.53e-06	0.011173	1.28e-06	0.000759	2.76e-06	5.89e-06	0.010085	0.010021	3.25e-07	0.000448	7.68e-08	8.84e-08	0.000142	9.76e-05
C6	0.000926	2.39e-05	0.000203	0.011248	1.53e-06	0.086783	7.56e-07	0.020094	7.76e-07	0.000397	0.00041	2.21e-07	7.86e-07	0.010328	7.91e-08	0.000659	0.000659	2.8e-08	5.37e-07
C7	2e-05	0.000716	0.0002	3.5e-06	0.011173	7.56e-07	0.087001	7.92e-07	0.020246	3.54e-07	3.08e-06	0.000434	0.00042	6.55e-08	0.010336	3.94e-08	6.7e-08	0.000683	0.000641
C8	0.000452	2.06e-05	0.00011	0.000818	1.28e-06	0.020094	7.92e-07	0.089007	5.06e-07	0.000139	0.000194	9e-08	4.04e-07	0.000641	1.6e-07	0.010487	0.010547	2.1e-08	4.11e-07
C9	1.42e-05	0.000421	0.000199	3.27e-06	0.000759	7.76e-07	0.020246	5.06e-07	0.088917	1.87e-07	9.62e-07	0.000237	0.000196	3.28e-08	0.000653	2.68e-08	6.65e-08	0.010552	0.01031
H10	0.000642	1.44e-05	0.000108	0.010151	2.76e-06	0.000397	3.54e-07	0.000139	1.87e-07	0.008662	0.00032	4.73e-07	3.3e-06	0.00011	4.72e-08	8.71e-05	1.01e-05	1.06e-08	6.19e-08
H11	0.000608	0.000192	0.000153	0.01005	5.89e-06	0.00041	3.08e-06	0.000194	9.62e-07	0.00032	0.008422	3.48e-07	1.07e-06	3.62e-05	6.29e-07	1.14e-05	1.74e-05	4.97e-08	7.82e-07
H12	1.79e-05	0.000583	0.000191	1.03e-06	0.010085	2.21e-07	0.000434	9e-08	0.000237	4.73e-07	3.48e-07	0.008589	0.000327	9.19e-08	2.12e-05	1.35e-08	1.06e-08	1.54e-05	1.02e-05
H13	0.000201	0.000631	0.00014	6.56e-06	0.010021	7.86e-07	0.00042	4.04e-07	0.000196	3.3e-06	1.07e-06	0.000327	0.008386	2.64e-07	3.55e-05	5.4e-08	1.88e-08	1.52e-05	1.05e-05
H14	0.000126	3.66e-06	1.13e-05	0.000429	3.25e-07	0.010328	6.55e-08	0.000641	3.28e-08	0.00011	3.62e-05	9.19e-08	2.64e-07	0.00893	6.56e-09	0.000147	7.95e-05	1.93e-09	1.83e-08
H15	1.95e-06	0.000182	1.51e-05	5.68e-07	0.000448	7.91e-08	0.010336	1.6e-07	0.000653	4.72e-08	6.29e-07	2.12e-05	3.55e-05	6.56e-09	0.009096	6.16e-09	8.79e-09	8.66e-05	0.000145
H16	2.75e-05	1.2e-06	5.33e-06	0.000138	7.68e-08	0.000659	3.94e-08	0.010487	2.68e-08	8.71e-05	1.14e-05	1.35e-08	5.4e-08	0.000147	6.16e-09	0.008956	0.000365	1.29e-09	1.81e-08
H17	2.4e-05	1.35e-06	1.04e-05	0.000138	8.84e-08	0.000659	6.7e-08	0.010547	6.65e-08	1.01e-05	1.74e-05	1.06e-08	1.88e-08	7.95e-05	8.79e-09	0.000365	0.00892	2.47e-09	3.85e-08
H18	9.59e-07	3.45e-05	5.79e-06	1.1e-07	0.000142	2.8e-08	0.000683	2.1e-08	0.010552	1.06e-08	4.97e-08	1.54e-05	1.52e-05	1.93e-09	8.66e-05	1.29e-09	2.47e-09	0.00899	0.000347
H19	1.17e-05	0.000449	9.17e-05	1.43e-06	9.76e-05	5.37e-07	0.000641	4.11e-07	0.01031	6.19e-08	7.82e-07	1.02e-05	1.05e-05	1.83e-08	0.000145	1.81e-08	3.85e-08	0.000347	0.008558
Weighted LDM — diallyl_trisulfide_36_LIDI_matrix (× 0.00173481)
	S1	S2	S3	C4	C5	C6	C7	C8	C9	H10	H11	H12	H13	H14	H15	H16	H17	H18	H19	Total
S1	0.025353	0.000136	0.001135	0.000913	5.76e-06	7.52e-05	1.85e-06	3.65e-05	1.38e-06	4.83e-05	5.07e-05	1.21e-06	2.5e-06	1.09e-05	2.24e-07	1.92e-06	2.19e-06	7.66e-08	9.72e-08	0.163072
S2	0.000136	0.025358	0.001133	5.66e-06	0.000913	2.32e-06	7.36e-05	1.76e-06	3.59e-05	1.37e-06	2.06e-06	5.09e-05	4.88e-05	4.14e-07	1e-05	1.19e-07	9.93e-08	2.17e-06	1.9e-06
S3	0.001135	0.001133	0.025331	6.5e-05	6.59e-05	1.43e-05	1.6e-05	8.2e-06	8.68e-06	2.16e-05	3.73e-06	8.71e-06	1.1e-05	5.17e-07	9.13e-07	8.18e-07	3.87e-07	4.24e-07	8.09e-07
C4	0.000913	5.66e-06	6.5e-05	0.006958	3.63e-06	0.000895	3.86e-07	6.52e-05	3.02e-07	0.000801	0.000805	2.3e-07	8.32e-06	3.4e-05	2.9e-08	1.1e-05	1.1e-05	1.52e-08	3.43e-08
C5	5.76e-06	0.000913	6.59e-05	3.63e-06	0.006953	4.32e-07	0.000894	1.38e-07	6.49e-05	1.01e-06	4.84e-06	0.000807	0.000801	9.18e-08	3.41e-05	1.91e-08	1.8e-08	1.1e-05	1.1e-05
C6	7.52e-05	2.32e-06	1.43e-05	0.000895	4.32e-07	0.0069	5.19e-08	0.001597	3.91e-08	3.21e-05	3.22e-05	4.47e-08	9.85e-07	0.00082	6.27e-09	5.22e-05	5.26e-05	2.89e-09	3.63e-09
C7	1.85e-06	7.36e-05	1.6e-05	3.86e-07	0.000894	5.19e-08	0.006903	2.9e-08	0.001598	1.11e-07	3.37e-07	3.16e-05	3.31e-05	1.19e-08	0.000821	2.44e-09	2.91e-09	5.24e-05	5.23e-05
C8	3.65e-05	1.76e-06	8.2e-06	6.52e-05	1.38e-07	0.001597	2.9e-08	0.00708	9.41e-09	1.59e-05	1.14e-05	2.68e-08	2.43e-07	5.04e-05	4.43e-09	0.000838	0.000834	6.44e-10	1.02e-09
C9	1.38e-06	3.59e-05	8.68e-06	3.02e-07	6.49e-05	3.91e-08	0.001598	9.41e-09	0.007076	1.1e-07	3.18e-07	1.11e-05	1.56e-05	1.11e-08	5.09e-05	2.38e-09	2.61e-09	0.000834	0.000838
H10	4.83e-05	1.37e-06	2.16e-05	0.000801	1.01e-06	3.21e-05	1.11e-07	1.59e-05	1.1e-07	0.000674	2.61e-05	9.61e-08	1.82e-06	2.81e-06	6.54e-09	1.37e-06	9.22e-07	4.42e-09	7.89e-09
H11	5.07e-05	2.06e-06	3.73e-06	0.000805	4.84e-06	3.22e-05	3.37e-07	1.14e-05	3.18e-07	2.61e-05	0.000701	2.93e-07	9.32e-06	8.7e-06	3.75e-08	8.28e-07	7.3e-06	1.76e-08	3.49e-08
H12	1.21e-06	5.09e-05	8.71e-06	2.3e-07	0.000807	4.47e-08	3.16e-05	2.68e-08	1.11e-05	9.61e-08	2.93e-07	0.000691	2.6e-05	6.38e-09	8.8e-06	1.73e-09	2.05e-09	7.01e-06	8.11e-07
H13	2.5e-06	4.88e-05	1.1e-05	8.32e-06	0.000801	9.85e-07	3.31e-05	2.43e-07	1.56e-05	1.82e-06	9.32e-06	2.6e-05	0.000686	2.56e-07	2.86e-06	2.06e-08	3.91e-08	9.08e-07	1.37e-06
H14	1.09e-05	4.14e-07	5.17e-07	3.4e-05	9.18e-08	0.00082	1.19e-08	5.04e-05	1.11e-08	2.81e-06	8.7e-06	6.38e-09	2.56e-07	0.000706	2.17e-09	6.25e-06	1.17e-05	5.69e-10	1.2e-09
H15	2.24e-07	1e-05	9.13e-07	2.9e-08	3.41e-05	6.27e-09	0.000821	4.43e-09	5.09e-05	6.54e-09	3.75e-08	8.8e-06	2.86e-06	2.17e-09	0.00071	2.72e-10	7.97e-10	1.17e-05	6.31e-06
H16	1.92e-06	1.19e-07	8.18e-07	1.1e-05	1.91e-08	5.22e-05	2.44e-09	0.000838	2.38e-09	1.37e-06	8.28e-07	1.73e-09	2.06e-08	6.25e-06	2.72e-10	0.000707	2.9e-05	1.45e-10	1.35e-10
H17	2.19e-06	9.93e-08	3.87e-07	1.1e-05	1.8e-08	5.26e-05	2.91e-09	0.000834	2.61e-09	9.22e-07	7.3e-06	2.05e-09	3.91e-08	1.17e-05	7.97e-10	2.9e-05	0.000714	1.4e-10	1.96e-10
H18	7.66e-08	2.17e-06	4.24e-07	1.52e-08	1.1e-05	2.89e-09	5.24e-05	6.44e-10	0.000834	4.42e-09	1.76e-08	7.01e-06	9.08e-07	5.69e-10	1.17e-05	1.45e-10	1.4e-10	0.000712	2.9e-05
H19	9.72e-08	1.9e-06	8.09e-07	3.43e-08	1.1e-05	3.63e-09	5.23e-05	1.02e-09	0.000838	7.89e-09	3.49e-08	8.11e-07	1.37e-06	1.2e-09	6.31e-06	1.35e-10	1.96e-10	2.9e-05	0.000708

## Sheet: FD
Frobenius_Distance_Full_MATRIX
Conformer_ID	1	2	3	4	5	6	7	8	9	10	11	12	13	14	15	16	17	18	19	20	21	22	23	24	25	26	27	28	29	30	31	32	33	34	35	36
1	0	0.0577636	0.0424258	0.0568357	0.0499636	0.0518582	0.0421246	0.0566772	0.0477242	0.0480785	0.0440467	0.0551747	0.058415	0.0704402	0.0504965	0.0592391	0.0601676	0.0712909	0.0615066	0.0590111	0.0622412	0.0633852	0.048706	0.0574657	0.0593601	0.0614276	0.0608171	0.0520196	0.0664942	0.0737361	0.0762336	0.0515163	0.0530899	0.0553829	0.0551234	0.0547512
2		0	0.0404765	0.0511068	0.0459935	0.0517941	0.066342	0.0408905	0.0666689	0.0680595	0.0683935	0.0692035	0.0576707	0.0824443	0.0535524	0.0654607	0.0681758	0.0681071	0.0712221	0.0672277	0.0699976	0.0719256	0.0514274	0.0750585	0.075406	0.0754998	0.0793807	0.0699218	0.0647327	0.0827221	0.085524	0.0707053	0.0671158	0.0675711	0.0707529	0.0646101
3			0	0.051467	0.0481018	0.0520847	0.0691495	0.050603	0.0415772	0.0705885	0.0632133	0.0582185	0.0566316	0.0771845	0.0503083	0.0624835	0.0657446	0.0660535	0.0695373	0.0652467	0.067771	0.0675393	0.0487485	0.0639872	0.0646847	0.0645121	0.0693387	0.0616619	0.0628491	0.0749027	0.0766937	0.0640537	0.0601019	0.0607946	0.0624422	0.0598075
4				0	0.0543716	0.0531992	0.0636474	0.0552049	0.0594682	0.0675237	0.0657044	0.0641798	0.0583735	0.0767168	0.0485877	0.0629814	0.0682725	0.0700104	0.0702865	0.0647812	0.0668971	0.0670962	0.0484427	0.0709311	0.0724551	0.0690883	0.071479	0.0648117	0.0643801	0.0768684	0.0792654	0.0635355	0.0592255	0.0593975	0.0635156	0.0595737
5					0	0.0241847	0.0552532	0.0407895	0.0471197	0.0601203	0.0613505	0.0481965	0.0528732	0.068221	0.0498678	0.042709	0.0479885	0.0662114	0.0504232	0.0445709	0.051747	0.0501642	0.0448727	0.0572036	0.0573955	0.0583456	0.0607933	0.0520381	0.0562159	0.0648658	0.066417	0.0495663	0.050657	0.049336	0.0492116	0.0530297
6						0	0.0557795	0.0468465	0.0428755	0.0593359	0.0612583	0.050405	0.0562864	0.0678916	0.0508509	0.0435777	0.0500285	0.0625706	0.0529222	0.0482934	0.0476178	0.0447207	0.0489616	0.0559532	0.0598058	0.0545641	0.0605508	0.0521726	0.0544644	0.0661913	0.0680505	0.0506187	0.0519229	0.0506859	0.0480624	0.0534502
7							0	0.0626885	0.0681526	0.0319175	0.0382401	0.0625383	0.069911	0.0707185	0.0535379	0.0512119	0.0511474	0.0838968	0.0500069	0.049035	0.0543813	0.0589137	0.0480949	0.0544535	0.0557471	0.0633804	0.0612429	0.050116	0.0764826	0.0743756	0.0780208	0.041818	0.0535644	0.053489	0.0484481	0.0558909
8								0	0.0570829	0.0668907	0.0671078	0.0586711	0.0408176	0.0774588	0.0578241	0.0524922	0.0510994	0.0674591	0.0538721	0.0416444	0.0594013	0.0558061	0.0553013	0.0628133	0.0616896	0.0598738	0.0656827	0.0556042	0.0548561	0.0718114	0.0739528	0.0576223	0.0463484	0.0445356	0.0593277	0.0509898
9									0	0.0715606	0.0645292	0.0464877	0.0621736	0.0737293	0.058891	0.0468499	0.0521959	0.064936	0.0548946	0.056571	0.0515115	0.0565001	0.0559912	0.050536	0.0532585	0.0529079	0.0585596	0.0508095	0.0570588	0.0668153	0.0669498	0.0509339	0.0529927	0.0518664	0.0464735	0.0569594
10										0	0.0321715	0.0690437	0.0699292	0.0661601	0.0514936	0.0583287	0.058567	0.0849916	0.0628184	0.0593712	0.0573617	0.0530725	0.0523868	0.0604792	0.0619464	0.0609703	0.0586361	0.0539399	0.0788165	0.0793675	0.0791744	0.0561525	0.0556259	0.0591227	0.0575069	0.0531435
11											0	0.0632327	0.0692351	0.0595299	0.0456835	0.0530531	0.0561607	0.0849384	0.0620216	0.0597016	0.055824	0.0543768	0.0497562	0.0512014	0.0521098	0.0478054	0.0444598	0.0494176	0.0786277	0.0774177	0.0773989	0.054637	0.0508745	0.0564027	0.0523069	0.0522988
12												0	0.0621058	0.0712145	0.0585209	0.047035	0.0518306	0.0762978	0.0518218	0.0522372	0.0525179	0.0588076	0.0570086	0.0543506	0.0550067	0.0596863	0.058867	0.0510081	0.0661821	0.0692655	0.0714195	0.0479152	0.0521757	0.0527481	0.0489014	0.0566204
13													0	0.0772144	0.0548734	0.065921	0.0674494	0.0767794	0.0728897	0.0582067	0.0720063	0.0606506	0.0569987	0.0729706	0.074068	0.0630493	0.0660656	0.0597297	0.0673421	0.0835469	0.0839618	0.0650959	0.044412	0.047481	0.0646468	0.0508729
14														0	0.0496607	0.0615005	0.0649354	0.0913943	0.0749803	0.0715182	0.0716379	0.063838	0.0626931	0.0726715	0.073838	0.062228	0.0617129	0.0594566	0.0836672	0.0836128	0.0785781	0.0737161	0.0600986	0.0663151	0.0671109	0.0698763
15															0	0.048998	0.0547895	0.0761379	0.0638938	0.0585241	0.0600472	0.0540127	0.0317959	0.0629577	0.0642808	0.0537051	0.0558982	0.0459891	0.0706162	0.0749875	0.0726815	0.0569361	0.0399681	0.0473478	0.0507165	0.0498562
16																0	0.0196029	0.0752177	0.0284159	0.0380703	0.0348268	0.0454818	0.0479287	0.0460058	0.0444256	0.0475762	0.0496955	0.0364651	0.0649415	0.0631822	0.0618875	0.039045	0.0407791	0.0396522	0.0301206	0.0524546
17																	0	0.0774845	0.0195905	0.0343331	0.040924	0.0503811	0.0535994	0.0437697	0.0406093	0.0522475	0.056297	0.030899	0.0658402	0.0628265	0.0613003	0.0375437	0.041432	0.040958	0.0339988	0.0550626
18																		0	0.0788732	0.0795746	0.0737205	0.0776479	0.0740791	0.0775362	0.0810478	0.0789939	0.08511	0.0765748	0.0536947	0.0715053	0.0732473	0.0764607	0.0762079	0.0760597	0.0773759	0.075746
19																			0	0.0320206	0.0377792	0.0554869	0.0583766	0.0414796	0.0377234	0.0587766	0.0626482	0.0412505	0.067221	0.0617579	0.0645733	0.0321453	0.0504834	0.0467713	0.0381879	0.0572969
20																				0	0.047005	0.0433798	0.0542115	0.0452544	0.0420495	0.0496647	0.0561322	0.0440833	0.0660686	0.0606792	0.0634862	0.0376484	0.038561	0.0329271	0.0435643	0.0469193
21																					0	0.0404443	0.0564728	0.0383622	0.0423638	0.0479211	0.0540346	0.0501281	0.0648669	0.0675227	0.0703227	0.0423245	0.0534549	0.0520294	0.0434564	0.0462372
22																						0	0.0556282	0.0508111	0.054773	0.0327784	0.0454198	0.0508456	0.0673488	0.0704157	0.0693123	0.0543874	0.0441404	0.0438368	0.0506277	0.039434
23																							0	0.0595347	0.0611074	0.0576668	0.0603127	0.0487412	0.0672443	0.0712757	0.0722758	0.047403	0.0452923	0.0423792	0.0446049	0.0499528
24																								0	0.0153439	0.0402042	0.0478378	0.0449281	0.0686027	0.0657147	0.0700274	0.037096	0.0527068	0.0531593	0.0458285	0.0510706
25																									0	0.0442728	0.0496622	0.0462619	0.0718551	0.0640083	0.0680247	0.0375232	0.0530262	0.0529039	0.0467577	0.0533507
26																										0	0.0316196	0.0494245	0.0697128	0.0723725	0.0716186	0.0557123	0.042505	0.0456772	0.0521143	0.0444993
27																											0	0.0515545	0.0756167	0.0764267	0.075569	0.0577611	0.0470218	0.0514689	0.0543903	0.0516216
28																												0	0.0656317	0.0654867	0.0632062	0.0369966	0.0310819	0.038054	0.0303106	0.0439804
29																													0	0.0462709	0.0485394	0.0670561	0.0650595	0.0644524	0.0677812	0.0661703
30																														0	0.0196294	0.0617523	0.0675755	0.0655906	0.0644488	0.0714726
31																															0	0.0671095	0.0654834	0.0650096	0.0650293	0.0733387
32																																0	0.0432648	0.0393866	0.0295136	0.048729
33																																	0	0.021386	0.0398941	0.0384235
34																																		0	0.0372726	0.0408082
35																																			0	0.0473434
36																																				0
