# Supplementary material for: Comparative Analysis of Molecular Conformers Using Localization–Delocalization Matrices and Frobenius Distance
Source: Research Square preprint supplement (doi:10.21203/rs.3.rs-7999250/v1), 2025-11-18
Supplement: Supplementary file 8 [file e401ab94e569d2d184f59533.xlsx]

## Sheet: Boltzmann_distribution
Conformer ID	E (HF)	Delta E(HF)	HF (kcal/mol)	Boltzman distribution	Boltzman's weight	% (percentage)	Conformer_type	FD_R	FD_W	NLOC	Ndeloc
1	-516.097	0	0	1	0.562423	0.562423	acylic	0	0.0120038	29.3151	10.6847
2	-516.095	0.0020483	1.28531	0.262909	0.147866	0.147866	acylic	0.02	0.0186762	29.3144	10.6845
3	-516.095	0.0020618	1.29379	0.260604	0.14657	0.14657	acylic	0.02	0.0142843	29.3198	10.6801
4	-516.095	0.0020981	1.31656	0.254507	0.143141	0.143141	acylic	0.06	0.0535445	29.2908	10.7084
				1.77802	1	1				29.3122	10.6874

## Sheet: LDM
LDM — allyl_mercaptan_1_LIDI_matrix
	S1	C2	C3	C4	H5	H6	H7	H8	H9	H10		NLOC	Ndeloc
S1	14.7578	0.544146	0.044616	0.0226409	0.0269312	0.0311658	0.00830319	0.00160375	0.00133464	0.546333		29.3151	10.6847	39.9998
C2	0.544146	4.0028	0.515879	0.036876	0.466092	0.46644	0.0196053	0.00635203	0.0064368	0.0212325
C3	0.044616	0.515879	3.97327	0.922313	0.0196226	0.0188632	0.472494	0.030426	0.0306583	0.00564592
C4	0.0226409	0.036876	0.922313	4.08987	0.00973738	0.00652079	0.0288883	0.484168	0.48177	0.00240453
H5	0.0269312	0.466092	0.0196226	0.00973738	0.398077	0.0151209	0.00134105	0.000806411	0.000514224	0.00550099
H6	0.0311658	0.46644	0.0188632	0.00652079	0.0151209	0.40244	0.00524369	0.000488048	0.00445689	0.00139227
H7	0.00830319	0.0196053	0.472494	0.0288883	0.00134105	0.00524369	0.408444	0.00362947	0.00680388	0.000299475
H8	0.00160375	0.00635203	0.030426	0.484168	0.000806411	0.000488048	0.00362947	0.41111	0.0169683	0.000119215
H9	0.00133464	0.0064368	0.0306583	0.48177	0.000514224	0.00445689	0.00680388	0.0169683	0.415827	0.000144769
H10	0.546333	0.0212325	0.00564592	0.00240453	0.00550099	0.00139227	0.000299475	0.000119215	0.000144769	0.455474
Toatl	15.9849	6.08586	6.03379	6.08519	0.943743	0.952132	0.955052	0.955672	0.964914	1.03855	39.9998
LDM — allyl_mercaptan_2_LIDI_matrix
	S1	C2	C3	C4	H5	H6	H7	H8	H9	H10
S1	14.7507	0.543624	0.0452224	0.0223584	0.0319546	0.0260547	0.00523527	0.00162533	0.00107956	0.549257		29.3144	10.6845
C2	0.543624	4.00227	0.514954	0.0364364	0.467141	0.46615	0.0199494	0.00630519	0.00631478	0.0212944
C3	0.0452224	0.514954	3.96818	0.924295	0.0199083	0.0184196	0.473963	0.0305466	0.0306316	0.00310133
C4	0.0223584	0.0364364	0.924295	4.08225	0.0091868	0.00650857	0.029771	0.483984	0.481527	0.000675422
H5	0.0319546	0.467141	0.0199083	0.0091868	0.400192	0.0151535	0.00122912	0.000795275	0.000470274	0.00196877
H6	0.0260547	0.46615	0.0184196	0.00650857	0.0151535	0.399401	0.00527842	0.000494932	0.00430843	0.00532341
H7	0.00523527	0.0199494	0.473963	0.029771	0.00122912	0.00527842	0.419076	0.0037271	0.00688223	0.00198155
H8	0.00162533	0.00630519	0.0305466	0.483984	0.000795275	0.000494932	0.0037271	0.411611	0.0169371	5.79165e-05
H9	0.00107956	0.00631478	0.0306316	0.481527	0.000470274	0.00430843	0.00688223	0.0169371	0.415532	0.000161829
H10	0.549257	0.0212944	0.00310133	0.000675422	0.00196877	0.00532341	0.00198155	5.79165e-05	0.000161829	0.465228
Toatl	15.9771	6.08444	6.02922	6.077	0.948	0.947092	0.967093	0.956085	0.963846	1.04905	39.9989
LDM — allyl_mercaptan_3_LIDI_matrix
	S1	C2	C3	C4	H5	H6	H7	H8	H9	H10
S1	14.7576	0.541665	0.0425826	0.0201233	0.0297812	0.0313139	0.00723089	0.00120426	0.00126953	0.549945		29.3198	10.6801
C2	0.541665	4.00181	0.51573	0.0374035	0.467268	0.467103	0.0196768	0.00641755	0.00637585	0.0205849
C3	0.0425826	0.51573	3.9749	0.923514	0.0199201	0.0187701	0.472778	0.0303981	0.0304191	0.00536478
C4	0.0201233	0.0374035	0.923514	4.08289	0.009835	0.00657062	0.0292178	0.483826	0.481157	0.00264844
H5	0.0297812	0.467268	0.0199201	0.009835	0.400871	0.0152857	0.00151428	0.000828409	0.000549136	0.00294292
H6	0.0313139	0.467103	0.0187701	0.00657062	0.0152857	0.404184	0.00521854	0.000491562	0.00433158	0.000908658
H7	0.00723089	0.0196768	0.472778	0.0292178	0.00151428	0.00521854	0.408905	0.00363959	0.00677198	0.000257136
H8	0.00120426	0.00641755	0.0303981	0.483826	0.000828409	0.000491562	0.00363959	0.410463	0.0168522	0.000238828
H9	0.00126953	0.00637585	0.0304191	0.481157	0.000549136	0.00433158	0.00677198	0.0168522	0.413019	0.000110974
H10	0.549945	0.0205849	0.00536478	0.00264844	0.00294292	0.000908658	0.000257136	0.000238828	0.000110974	0.465075
Toatl	15.9828	6.08403	6.03438	6.07719	0.948796	0.954178	0.95521	0.95436	0.960857	1.04808	39.9998
LDM — allyl_mercaptan_4_LIDI_matrix
	S1	C2	C3	C4	H5	H6	H7	H8	H9	H10
S1	14.7248	0.552457	0.0355129	0.0211759	0.031793	0.0267687	0.00876576	0.00168516	0.0229263	0.544658		29.2908	10.7084
C2	0.552457	4.01194	0.512808	0.0349115	0.465777	0.464443	0.0204712	0.00652605	0.00458077	0.0214053
C3	0.0355129	0.512808	3.99081	0.929359	0.0206116	0.0202636	0.474218	0.0314754	0.0293929	0.0031995
C4	0.0211759	0.0349115	0.929359	4.08497	0.00964602	0.0110037	0.0301238	0.484275	0.472775	0.00343066
H5	0.031793	0.465777	0.0206116	0.00964602	0.399948	0.0157113	0.00160655	0.000727779	0.000559577	0.00177968
H6	0.0267687	0.464443	0.0202636	0.0110037	0.0157113	0.395374	0.00109349	0.000736624	0.000510717	0.0055297
H7	0.00876576	0.0204712	0.474218	0.0301238	0.00160655	0.00109349	0.418906	0.00396118	0.00668836	0.000252689
H8	0.00168516	0.00652605	0.0314754	0.484275	0.000727779	0.000736624	0.00396118	0.413423	0.0159318	0.000159618
H9	0.0229263	0.00458077	0.0293929	0.472775	0.000559577	0.000510717	0.00668836	0.0159318	0.391666	0.00250341
H10	0.544658	0.0214053	0.0031995	0.00343066	0.00177968	0.0055297	0.000252689	0.000159618	0.00250341	0.458923
Toatl	15.9706	6.09532	6.04765	6.08167	0.948161	0.941434	0.966086	0.958902	0.947535	1.04184	39.9991
Weighted Ensemble LDM (Σ w·LDM)
	S1	C2	C3	C4	H5	H6	H7	H8	H9	H10
S1	14.752	0.544895	0.0431046	0.0220204	0.0287876	0.0298024	0.00775859	0.00156004	0.00437803	0.547055		29.3122	10.6874
C2	0.544895	4.00388	0.515281	0.0366071	0.466374	0.466208	0.0197906	0.00637962	0.00614415	0.0211715
C3	0.0431046	0.515281	3.97527	0.923791	0.01985	0.0189844	0.472999	0.0305899	0.0304382	0.00487827
C4	0.0220204	0.0366071	0.923791	4.08702	0.0096572	0.00716797	0.0292439	0.484106	0.480357	0.00233148
H5	0.0287876	0.466374	0.01985	0.0096572	0.399067	0.0152344	0.00138789	0.000796733	0.000519334	0.00407109
H6	0.0298024	0.466208	0.0189844	0.00716797	0.0152344	0.401235	0.00465107	0.000525162	0.00385171	0.0024949
H7	0.00775859	0.0197906	0.472999	0.0292439	0.00138789	0.00465107	0.411581	0.00369287	0.00679425	0.000535294
H8	0.00156004	0.00637962	0.0305899	0.484106	0.000796733	0.000525162	0.00369287	0.411421	0.0167983	0.000133466
H9	0.00437803	0.00614415	0.0304382	0.480357	0.000519334	0.00385171	0.00679425	0.0167983	0.411913	0.000479955
H10	0.547055	0.0211715	0.00487827	0.00233148	0.00407109	0.0024949	0.000535294	0.000133466	0.000479955	0.458817
Toatl	15.9814	6.08673	6.03518	6.0823	0.945745	0.950155	0.958435	0.956003	0.961674	1.04197	39.9996
individual
1
2
3
4

## Sheet: weighted_LDM
Weighted LDM — allyl_mercaptan_1_LIDI_matrix (× 0.562423)
	S1	C2	C3	C4	H5	H6	H7	H8	H9	H10	Total
S1	8.30012	0.306041	0.0250931	0.0127338	0.0151467	0.0175284	0.00466991	0.000901988	0.000750635	0.30727	22.4968
C2	0.306041	2.25127	0.290142	0.0207399	0.262141	0.262337	0.0110265	0.00357253	0.00362021	0.0119417
C3	0.0250931	0.290142	2.23466	0.51873	0.0110362	0.0106091	0.265741	0.0171123	0.0172429	0.00317539
C4	0.0127338	0.0207399	0.51873	2.30024	0.00547653	0.00366744	0.0162474	0.272307	0.270959	0.00135236
H5	0.0151467	0.262141	0.0110362	0.00547653	0.223888	0.00850434	0.000754236	0.000453544	0.000289211	0.00309389
H6	0.0175284	0.262337	0.0106091	0.00366744	0.00850434	0.226342	0.00294917	0.00027449	0.00250666	0.000783044
H7	0.00466991	0.0110265	0.265741	0.0162474	0.000754236	0.00294917	0.229719	0.0020413	0.00382666	0.000168432
H8	0.000901988	0.00357253	0.0171123	0.272307	0.000453544	0.00027449	0.0020413	0.231218	0.00954335	6.70492e-05
H9	0.000750635	0.00362021	0.0172429	0.270959	0.000289211	0.00250666	0.00382666	0.00954335	0.233871	8.14213e-05
H10	0.30727	0.0119417	0.00317539	0.00135236	0.00309389	0.000783044	0.000168432	6.70492e-05	8.14213e-05	0.256169
Weighted LDM — allyl_mercaptan_2_LIDI_matrix (× 0.147866)
	S1	C2	C3	C4	H5	H6	H7	H8	H9	H10	Total
S1	2.18113	0.0803836	0.00668686	0.00330605	0.00472501	0.0038526	0.000774119	0.000240331	0.000159631	0.0812165	5.91449
C2	0.0803836	0.5918	0.0761443	0.00538772	0.0690743	0.0689278	0.00294985	0.000932325	0.000933743	0.00314872
C3	0.00668686	0.0761443	0.586759	0.136672	0.00294376	0.00272363	0.0700832	0.00451681	0.00452939	0.000458582
C4	0.00330605	0.00538772	0.136672	0.603627	0.00135842	0.000962398	0.00440213	0.0715649	0.0712016	9.98722e-05
H5	0.00472501	0.0690743	0.00294376	0.00135842	0.0591749	0.00224069	0.000181746	0.000117594	6.95376e-05	0.000291115
H6	0.0038526	0.0689278	0.00272363	0.000962398	0.00224069	0.0590579	0.0007805	7.31837e-05	0.000637071	0.000787152
H7	0.000774119	0.00294985	0.0700832	0.00440213	0.000181746	0.0007805	0.0619671	0.000551113	0.00101765	0.000293004
H8	0.000240331	0.000932325	0.00451681	0.0715649	0.000117594	7.31837e-05	0.000551113	0.0608634	0.00250443	8.56389e-06
H9	0.000159631	0.000933743	0.00452939	0.0712016	6.95376e-05	0.000637071	0.00101765	0.00250443	0.0614432	2.3929e-05
H10	0.0812165	0.00314872	0.000458582	9.98722e-05	0.000291115	0.000787152	0.000293004	8.56389e-06	2.3929e-05	0.0687915
Weighted LDM — allyl_mercaptan_3_LIDI_matrix (× 0.14657)
	S1	C2	C3	C4	H5	H6	H7	H8	H9	H10	Total
S1	2.16303	0.0793918	0.00624133	0.00294947	0.00436502	0.00458968	0.00105983	0.000176508	0.000186075	0.0806055	5.86278
C2	0.0793918	0.586545	0.0755905	0.00548223	0.0684875	0.0684633	0.00288402	0.000940621	0.000934508	0.00301713
C3	0.00624133	0.0755905	0.582602	0.135359	0.00291969	0.00275113	0.069295	0.00445545	0.00445853	0.000786316
C4	0.00294947	0.00548223	0.135359	0.598429	0.00144152	0.000963055	0.00428246	0.0709144	0.0705232	0.000388182
H5	0.00436502	0.0684875	0.00291969	0.00144152	0.0587556	0.00224043	0.000221948	0.00012142	8.04869e-05	0.000431343
H6	0.00458968	0.0684633	0.00275113	0.000963055	0.00224043	0.0592412	0.000764881	7.20482e-05	0.000634879	0.000133182
H7	0.00105983	0.00288402	0.069295	0.00428246	0.000221948	0.000764881	0.0599332	0.000533455	0.000992569	3.76884e-05
H8	0.000176508	0.000940621	0.00445545	0.0709144	0.00012142	7.20482e-05	0.000533455	0.0601616	0.00247003	3.5005e-05
H9	0.000186075	0.000934508	0.00445853	0.0705232	8.04869e-05	0.000634879	0.000992569	0.00247003	0.0605362	1.62654e-05
H10	0.0806055	0.00301713	0.000786316	0.000388182	0.000431343	0.000133182	3.76884e-05	3.5005e-05	1.62654e-05	0.0681661
Weighted LDM — allyl_mercaptan_4_LIDI_matrix (× 0.143141)
	S1	C2	C3	C4	H5	H6	H7	H8	H9	H10	Total
S1	2.10772	0.0790789	0.00508334	0.00303114	0.00455087	0.00383169	0.00125474	0.000241214	0.00328169	0.0779627	5.7255
C2	0.0790789	0.574271	0.0734036	0.00499726	0.0666716	0.0664806	0.00293026	0.000934142	0.000655694	0.00306397
C3	0.00508334	0.0734036	0.571247	0.133029	0.00295036	0.00290054	0.0678798	0.0045054	0.00420731	0.000457978
C4	0.00303114	0.00499726	0.133029	0.584725	0.00138074	0.00157507	0.00431194	0.0693194	0.0676733	0.000491066
H5	0.00455087	0.0666716	0.00295036	0.00138074	0.0572488	0.00224892	0.000229962	0.000104175	8.00982e-05	0.000254744
H6	0.00383169	0.0664806	0.00290054	0.00157507	0.00224892	0.056594	0.000156523	0.000105441	7.31043e-05	0.000791525
H7	0.00125474	0.00293026	0.0678798	0.00431194	0.000229962	0.000156523	0.0599624	0.000567005	0.000957376	3.617e-05
H8	0.000241214	0.000934142	0.0045054	0.0693194	0.000104175	0.000105441	0.000567005	0.0591776	0.00228049	2.28478e-05
H9	0.00328169	0.000655694	0.00420731	0.0676733	8.00982e-05	7.31043e-05	0.000957376	0.00228049	0.0560633	0.000358339
H10	0.0779627	0.00306397	0.000457978	0.000491066	0.000254744	0.000791525	3.617e-05	2.28478e-05	0.000358339	0.0656905

## Sheet: FD
Conformer_ID	1	2	3	4
1	0	0.02	0.02	0.06
2		0	0.02	0.06
3			0	0.06
4				0
